# Supplementary material for: Pharmacological Activation of SIRT6 Suppresses Progression of Head and Neck and Esophagus Squamous Cell Carcinoma by Modulation of Cellular Metabolism and Protein Translation
Source: Research Square preprint supplement (doi:10.21203/rs.3.rs-5797433/v1), 2025-01-30
Supplement: Supplementary file 1 [file 9e001bb15ec86ffe9f5d351a.xlsx]

## Sheet: Combined
	SNU	SNU	SNU	SNU	SNU	KYSE	KYSE	KYSE	KYSE	KYSE
symbol	FDR	pval	rep.LogFC	direction	rank	FDR	pval	rep.LogFC	direction	rank
LOC100288069	3.62677e-26	4.69272e-30	-2.55683	down	-2.55683	3.91619e-11	5.07344e-15	-1.18381	down	-1.18381
LOC101928626	3.62677e-26	4.69272e-30	-2.55683	down	-2.55683	3.91619e-11	5.07344e-15	-1.18381	down	-1.18381
LOC105378947	3.62677e-26	4.69272e-30	-2.55683	down	-2.55683	3.91619e-11	5.07344e-15	-1.18381	down	-1.18381
OR4F16	3.62677e-26	4.69272e-30	-2.55683	down	-2.55683	3.91619e-11	5.07344e-15	-1.18381	down	-1.18381
LOC100288069	1.04773e-25	2.03351e-29	-2.55683	down	-2.55683	3.91619e-11	5.07344e-15	-1.18381	down	-1.18381
LOC101928626	1.04773e-25	2.03351e-29	-2.55683	down	-2.55683	3.91619e-11	5.07344e-15	-1.18381	down	-1.18381
LOC105378947	1.04773e-25	2.03351e-29	-2.55683	down	-2.55683	3.91619e-11	5.07344e-15	-1.18381	down	-1.18381
LINC00115	1.04773e-25	2.03351e-29	-2.55683	down	-2.55683	4.10267e-11	7.97255e-15	-1.18381	down	-1.18381
OR4F16	1.04773e-25	2.03351e-29	-2.55683	down	-2.55683	3.91619e-11	5.07344e-15	-1.18381	down	-1.18381
KIF5C-AS1	5.05005e-10	1.30686e-13	-2.18445	down	-2.18445
LOC112267944	3.25506e-08	1.26353e-11	-1.56008	down	-1.56008	0.0134317	0.000896146	-0.836863	down	-0.836863
ADAMTS19	3.25506e-08	1.26353e-11	-1.56008	down	-1.56008	0.00604399	0.000256042	-0.836863	down	-0.836863
RABL3	9.94634e-08	4.50439e-11	-1.26392	down	-1.26392	1.05116e-09	3.40444e-13	-1.28332	down	-1.28332
HGD	9.94634e-08	4.50439e-11	-1.26392	down	-1.26392	1.05116e-09	3.40444e-13	-1.28332	down	-1.28332
MIR1302-5	1.58634e-06	8.62923e-10	-2.56746	down	-2.56746
LINC02284	1.58634e-06	1.02629e-09	-1.41691	down	-1.41691	0.00920646	0.000474651	-0.682201	down	-0.682201
124903321	1.58634e-06	1.02629e-09	-1.41691	down	-1.41691	0.00920646	0.000474651	-0.682201	down	-0.682201
RIPOR3	1.58634e-06	8.62923e-10	-2.56746	down	-2.56746
DSTN	8.22615e-06	5.85415e-09	4.549	up	4.549	0.0917597	0.0209755	-0.855499	down	-0.855499
GMNN	1.39822e-05	1.0855e-08	-1.63746	down	-1.63746	1.03938e-07	6.73258e-11	-1.37764	down	-1.37764
MIR4256	2.04616e-05	1.84052e-08	-1.89835	down	-1.89835
SCAPER	2.04616e-05	1.85328e-08	-1.09409	down	-1.09409	1.03938e-07	6.56369e-11	-1.14321	down	-1.14321
HPCAL4	3.78609e-05	3.67415e-08	-1.94225	down	-1.94225	0.650982	0.476662	0.53366	up	0.53366
PLEKHG6	4.58196e-05	5.33579e-08	1.58218	up	1.58218	0.0368963	0.00462458	0.910468	up	0.910468
ZNF75A	4.58196e-05	5.19518e-08	2.0957	up	2.0957	0.00546446	0.00021517	0.818911	up	0.818911
TIGD7	4.58196e-05	5.19518e-08	2.0957	up	2.0957	0.00546446	0.00021517	0.818911	up	0.818911
AK8	5.37233e-05	6.60376e-08	-2.34552	down	-2.34552	0.292915	0.137412	0.867879	up	0.867879
POU2F3	6.124e-05	7.92392e-08	-2.12005	down	-2.12005
SLC38A2-AS1	6.49695e-05	9.24713e-08	1.61244	up	1.61244	0.279113	0.126833	0.790842	up	0.790842
SLC38A2	6.49695e-05	9.24713e-08	1.61244	up	1.61244	0.279113	0.126833	0.790842	up	0.790842
ERC1	6.64094e-05	9.88171e-08	-2.08991	down	-2.08991	0.322455	0.161269	0.980327	up	0.980327
WNT2B	7.11223e-05	1.10431e-07	-1.89835	down	-1.89835	0.130625	0.037475	0.965603	up	0.965603
MIR6124	9.46523e-05	1.55291e-07	-1.79352	down	-1.79352	0.0204834	0.00181907	-1.00628	down	-1.00628
PPIE	9.46523e-05	1.59213e-07	-1.94225	down	-1.94225	0.247602	0.104345	0.997238	up	0.997238
MICAL2	9.46523e-05	1.55291e-07	-1.79352	down	-1.79352	0.0204834	0.00181907	-1.00628	down	-1.00628
TMEM63C	0.000120541	2.10558e-07	-1.46815	down	-1.46815	0.00233405	5.54863e-05	-1.5101	down	-1.5101
CIPC	0.000120541	2.10558e-07	-1.46815	down	-1.46815	0.00233405	5.54863e-05	-1.5101	down	-1.5101
TLE6	0.000135721	2.45855e-07	1.85308	up	1.85308	0.50169	0.319869	0.480588	up	0.480588
ARL16	0.000220058	4.12866e-07	-1.2821	down	-1.2821	0.038081	0.00491674	-0.580421	down	-0.580421
ZMYM2	0.000270662	5.25318e-07	1.76737	up	1.76737	0.00152406	2.82343e-05	1.88446	up	1.88446
MIR6786	0.000308791	6.19299e-07	-1.2821	down	-1.2821	0.0554091	0.00901402	-0.580421	down	-0.580421
SLC25A10	0.000308791	6.19299e-07	-1.2821	down	-1.2821	0.0554091	0.00901402	-0.580421	down	-0.580421
MRPL12	0.000308791	6.19299e-07	-1.2821	down	-1.2821	0.0554091	0.00901402	-0.580421	down	-0.580421
HGS	0.000308791	6.19299e-07	-1.2821	down	-1.2821	0.0554091	0.00901402	-0.580421	down	-0.580421
LOC105372524	0.000356651	7.38361e-07	-1.08777	down	-1.08777	0.558552	0.375769	-0.351562	down	-0.351562
SNAP25	0.000356651	7.38361e-07	-1.08777	down	-1.08777	0.558552	0.375769	-0.351562	down	-0.351562
HEXIM1	0.000365026	7.79313e-07	1.77611	up	1.77611	0.00318623	8.87558e-05	1.19066	up	1.19066
DAPK2	0.000446065	9.81187e-07	-1.94726	down	-1.94726	0.38514	0.213767	0.658326	up	0.658326
CIAO2A	0.000446065	9.81187e-07	-1.94726	down	-1.94726	0.38514	0.213767	0.658326	up	0.658326
FBXW4P1	0.000448207	1.0149e-06	-1.85564	down	-1.85564	0.905615	0.805304	0.321286	up	0.321286
BCR	0.000448207	1.0149e-06	-1.85564	down	-1.85564	0.905615	0.805304	0.321286	up	0.321286
MIR6079	0.000576182	1.37923e-06	-1.94078	down	-1.94078	0.192261	0.070399	-0.740419	down	-0.740419
ST3GAL3	0.000576182	1.37923e-06	-1.94078	down	-1.94078	0.192261	0.070399	-0.740419	down	-0.740419
TBL1XR1	0.000576182	1.34259e-06	2.2831	up	2.2831	0.379538	0.209019	0.361654	mixed	0.361654
ARTN	0.000576182	1.37923e-06	-1.94078	down	-1.94078	0.192261	0.070399	-0.740419	down	-0.740419
KDM4A	0.000576182	1.37923e-06	-1.94078	down	-1.94078	0.192261	0.070399	-0.740419	down	-0.740419
UVRAG-DT	0.000614478	1.55041e-06	-1.54367	down	-1.54367	0.316936	0.157072	-0.677748	down	-0.677748
UVRAG	0.000614478	1.55041e-06	-1.54367	down	-1.54367	0.316936	0.157072	-0.677748	down	-0.677748
SLCO3A1	0.00063189	1.63522e-06	-2.13952	down	-2.13952	0.0491858	0.00739774	0.854094	up	0.854094
PIGU	0.000638158	1.72551e-06	1.69727	up	1.69727	0.0978877	0.0231727	-0.887312	mixed	-0.887312
NCOA6	0.000638158	1.72551e-06	1.69727	up	1.69727	0.0978877	0.0231727	-0.887312	mixed	-0.887312
TSPAN14	0.000638158	1.74689e-06	-1.82227	down	-1.82227	0.0161333	0.0012362	-1.22175	down	-1.22175
CDC7	0.000638158	1.7753e-06	-1.44572	down	-1.44572	0.0771287	0.0155204	-0.877668	down	-0.877668
SNAP25-AS1	0.000714743	2.08083e-06	-1.08777	down	-1.08777	0.804206	0.661354	-0.351562	mixed	-0.351562
MIR6079	0.000714743	2.036e-06	-1.94078	down	-1.94078	0.192261	0.070399	-0.740419	down	-0.740419
ST3GAL3	0.000714743	2.036e-06	-1.94078	down	-1.94078	0.192261	0.070399	-0.740419	down	-0.740419
ARTN	0.000714743	2.036e-06	-1.94078	down	-1.94078	0.192261	0.070399	-0.740419	down	-0.740419
KDM4A	0.000714743	2.036e-06	-1.94078	down	-1.94078	0.192261	0.070399	-0.740419	down	-0.740419
KCNK5	0.000725715	2.15973e-06	-1.71252	down	-1.71252	0.897561	0.792892	-0.263134	mixed	-0.263134
TET3	0.000790966	2.40508e-06	-1.57882	down	-1.57882	0.0203915	0.00180562	1.18302	up	1.18302
LINC00963	0.000997502	3.09763e-06	1.48253	up	1.48253	0.00233405	5.53584e-05	1.10756	up	1.10756
LOC124900275	0.000997502	3.09763e-06	1.48253	up	1.48253	0.00233405	5.53584e-05	1.10756	up	1.10756
TSPAN11-AS1	0.00112547	3.64175e-06	-1.60981	down	-1.60981
ZSWIM7	0.00112547	3.71348e-06	2.31642	up	2.31642	0.620164	0.443094	-0.515593	down	-0.515593
TTC19	0.00112547	3.71348e-06	2.31642	up	2.31642	0.620164	0.443094	-0.515593	down	-0.515593
LINC01126	0.00115827	4.04877e-06	1.43593	up	1.43593	0.342803	0.178219	0.784126	up	0.784126
FAM174A-DT	0.00115827	4.19637e-06	-1.32069	down	-1.32069	0.0626054	0.0109979	-1.22449	down	-1.22449
FAM174A	0.00115827	4.19637e-06	-1.32069	down	-1.32069	0.0626054	0.0109979	-1.22449	down	-1.22449
ZFP36L2	0.00115827	4.04877e-06	1.43593	up	1.43593	0.342803	0.178219	0.784126	up	0.784126
PRSS27	0.00115827	4.10431e-06	1.73298	up	1.73298	0.214563	0.0839268	-0.551107	mixed	-0.551107
FXYD6-FXYD2	0.00147574	5.4685e-06	-1.64952	down	-1.64952	0.57065	0.389379	-0.311388	down	-0.311388
FXYD2	0.00147574	5.4685e-06	-1.64952	down	-1.64952	0.57065	0.389379	-0.311388	down	-0.311388
DSCAML1	0.00147574	5.4685e-06	-1.64952	down	-1.64952	0.57065	0.389379	-0.311388	down	-0.311388
MTA3	0.00147574	5.5375e-06	1.48334	up	1.48334	0.000195352	1.267e-06	1.12847	up	1.12847
UBOX5	0.00153791	6.06926e-06	-0.903068	down	-0.903068	0.0554091	0.00904662	0.953525	up	0.953525
IVD	0.00153791	6.02619e-06	-1.19596	down	-1.19596	0.14405	0.0439856	-0.478915	down	-0.478915
FASTKD5	0.00153791	6.06926e-06	-0.903068	down	-0.903068	0.0554091	0.00904662	0.953525	up	0.953525
LZTS3	0.00153791	6.06926e-06	-0.903068	down	-0.903068	0.0554091	0.00904662	0.953525	up	0.953525
MAB21L3	0.00165726	6.64749e-06	-1.60409	down	-1.60409
LOC105370188	0.00182625	7.67979e-06	-1.41364	down	-1.41364	0.453359	0.274375	-0.47927	down	-0.47927
NUFIP1	0.00182625	7.67979e-06	-1.41364	down	-1.41364	0.453359	0.274375	-0.47927	down	-0.47927
GPALPP1	0.00182625	7.67979e-06	-1.41364	down	-1.41364	0.453359	0.274375	-0.47927	down	-0.47927
ZFAND3-DT	0.00184209	7.98475e-06	1.42484	up	1.42484	0.0285819	0.00313257	0.93977	up	0.93977
ZFAND3	0.00184209	7.98475e-06	1.42484	up	1.42484	0.0285819	0.00313257	0.93977	up	0.93977
LOC101927023	0.00198882	8.74943e-06	-1.36071	down	-1.36071
TP53RK	0.00206578	9.22163e-06	-0.916087	down	-0.916087	0.873354	0.755576	-0.0963477	mixed	-0.0963477
SLC13A3	0.00206578	9.22163e-06	-0.916087	down	-0.916087	0.873354	0.755576	-0.0963477	mixed	-0.0963477
EML5	0.00217423	9.84641e-06	-1.06564	down	-1.06564	0.286061	0.132691	-0.728871	down	-0.728871
ACBD4	0.0022508	1.03388e-05	1.83877	up	1.83877	0.4107	0.236579	0.577896	up	0.577896
POMT1	0.00228412	1.06396e-05	-1.23569	down	-1.23569	0.179158	0.0629195	1.0576	up	1.0576
PRRC2B	0.00228412	1.06396e-05	-1.23569	down	-1.23569	0.179158	0.0629195	1.0576	up	1.0576
TP53RK	0.00231026	1.11922e-05	1.77317	up	1.77317	0.873354	0.755576	-0.0963477	mixed	-0.0963477
GNG10	0.00231026	1.15087e-05	-1.90081	down	-1.90081	0.0876511	0.0192698	0.716231	mixed	0.716231
DNAJC25-GNG10	0.00231026	1.15087e-05	-1.90081	down	-1.90081	0.0705128	0.0133005	-0.779967	down	-0.779967
KDM3A	0.00231026	1.10589e-05	-1.25432	down	-1.25432	0.245659	0.103018	-0.818457	down	-0.818457
SLC13A3	0.00231026	1.11922e-05	1.77317	up	1.77317	0.873354	0.755576	-0.0963477	mixed	-0.0963477
SIGLEC1	0.00231026	1.14449e-05	-1.65128	down	-1.65128
TFAP4	0.00231026	1.13272e-05	1.43173	up	1.43173	0.461346	0.281685	-0.835442	down	-0.835442
MIR6784	0.00235923	1.19053e-05	1.83877	up	1.83877	0.521776	0.339097	0.577896	up	0.577896
PLCD3	0.00235923	1.19053e-05	1.83877	up	1.83877	0.521776	0.339097	0.577896	up	0.577896
HIF3A	0.00235945	1.2059e-05	-1.48344	down	-1.48344
SSBP2	0.00243838	1.26798e-05	1.37406	up	1.37406	0.0515345	0.00800157	0.875788	up	0.875788
SLC24A3	0.00243838	1.2778e-05	-1.75269	down	-1.75269
SKIDA1	0.00259287	1.37553e-05	2.05017	up	2.05017	0.282121	0.129322	-0.691249	down	-0.691249
INPP5F	0.00264244	1.41892e-05	-1.88262	down	-1.88262	0.0160085	0.00121757	-0.806295	down	-0.806295
MIR3654	0.0028217	1.53343e-05	-0.984578	down	-0.984578	0.913028	0.815436	-0.159907	mixed	-0.159907
CHCHD3	0.0028217	1.53343e-05	-0.984578	down	-0.984578	0.913028	0.815436	-0.159907	mixed	-0.159907
LOC124900718	0.00299018	1.66368e-05	-1.70119	down	-1.70119	0.0820281	0.0173217	-0.838296	down	-0.838296
NUP54	0.00299018	1.66368e-05	-1.70119	down	-1.70119	0.0820281	0.0173217	-0.838296	down	-0.838296
SCNN1A	0.00324172	1.82461e-05	1.88178	up	1.88178	0.00657514	0.000284931	-1.28341	down	-1.28341
MIR3973	0.00329347	1.95372e-05	2.06613	up	2.06613	0.253367	0.108452	-0.742882	down	-0.742882
SEMA4D	0.00329347	1.92749e-05	-1.14842	down	-1.14842	0.99056	0.965728	-0.362762	mixed	-0.362762
FBLN5	0.00329347	1.96027e-05	1.81738	up	1.81738	0.855357	0.72809	-0.165082	mixed	-0.165082
TC2N	0.00329347	1.96027e-05	1.81738	up	1.81738	0.855357	0.72809	-0.165082	mixed	-0.165082
LOC124903705	0.00329347	1.90452e-05	-1.56362	down	-1.56362	0.000146073	8.89417e-07	-1.25505	down	-1.25505
LDLRAD3	0.00329347	1.95372e-05	2.06613	up	2.06613	0.253367	0.108452	-0.742882	down	-0.742882
SMPD3	0.00329347	1.90452e-05	-1.56362	down	-1.56362	0.00018874	1.18589e-06	-1.25505	down	-1.25505
DEPTOR	0.0033504	2.01584e-05	-0.999814	down	-0.999814	0.329958	0.167544	-0.652533	down	-0.652533
MIR5092	0.00341745	2.07828e-05	-1.76997	down	-1.76997	0.0128788	0.000830055	0.681629	up	0.681629
SLC12A8	0.00341745	2.07828e-05	-1.76997	down	-1.76997	0.0128788	0.000830055	0.681629	up	0.681629
LINC01530	0.00345773	2.12515e-05	-1.13688	down	-1.13688	0.025628	0.00258909	-1.01776	down	-1.01776
LDLRAD1	0.00348085	2.16188e-05	-1.51614	down	-1.51614
ARHGAP33	0.00368147	2.31029e-05	-1.6045	down	-1.6045	0.0665875	0.0121158	-0.641931	down	-0.641931
CHEK2	0.00374614	2.42359e-05	-1.54407	down	-1.54407	0.607887	0.42999	-0.574174	down	-0.574174
HSCB	0.00374614	2.42359e-05	-1.54407	down	-1.54407	0.607887	0.42999	-0.574174	down	-0.574174
RIN2	0.00374614	2.40808e-05	1.64317	up	1.64317	0.514014	0.332088	0.772273	up	0.772273
GNG10	0.00378442	2.51753e-05	-1.90081	down	-1.90081	0.0876511	0.0192698	0.716231	mixed	0.716231
LTBR	0.00378442	2.48033e-05	1.88178	up	1.88178	0.0113427	0.000678881	0.728759	up	0.728759
DNAJC25	0.00378442	2.51753e-05	-1.90081	down	-1.90081	0.0705128	0.0133005	-0.779967	down	-0.779967
DNAJC25-GNG10	0.00378442	2.51753e-05	-1.90081	down	-1.90081	0.0705128	0.0133005	-0.779967	down	-0.779967
MLLT10	0.00378442	2.5218e-05	2.05017	up	2.05017	0.418285	0.243363	-0.604346	down	-0.604346
SLC46A1	0.00382967	2.62937e-05	-1.62776	down	-1.62776	0.978854	0.935168	-0.026435	mixed	-0.026435
HNRNPK	0.00382967	2.65106e-05	1.2513	up	1.2513	0.402659	0.229092	-0.827272	down	-0.827272
MIR7-1	0.00382967	2.65106e-05	1.2513	up	1.2513	0.402659	0.229092	-0.827272	down	-0.827272
RMI1	0.00382967	2.65106e-05	1.2513	up	1.2513	0.402659	0.229092	-0.827272	down	-0.827272
BCAR3	0.00382967	2.5782e-05	-1.78264	down	-1.78264	0.21258	0.0826745	-0.623869	mixed	-0.623869
LOC105374116	0.00389145	2.74418e-05	-1.02093	down	-1.02093	0.00239875	5.84227e-05	-0.694283	down	-0.694283
SRPRB	0.00389145	2.74418e-05	-1.02093	down	-1.02093	0.00239875	5.84227e-05	-0.694283	down	-0.694283
TF	0.00389145	2.74418e-05	-1.02093	down	-1.02093	0.00239875	5.84227e-05	-0.694283	down	-0.694283
ABALON	0.00401143	2.85474e-05	-1.85967	down	-1.85967	0.915281	0.818727	0.118606	mixed	0.118606
MIR4304	0.00406779	2.92116e-05	-1.75944	down	-1.75944	0.803314	0.659854	-0.277617	mixed	-0.277617
MPHOSPH9	0.00406779	2.92116e-05	-1.75944	down	-1.75944	0.803314	0.659854	-0.277617	mixed	-0.277617
ABCB9	0.00406779	2.92116e-05	-1.75944	down	-1.75944	0.482169	0.301185	-0.759852	down	-0.759852
PITPNM2	0.00406779	2.92116e-05	-1.75944	down	-1.75944	0.482169	0.301185	-0.759852	down	-0.759852
ZMIZ1	0.00412009	2.98538e-05	-1.6357	down	-1.6357	0.0247133	0.00244453	-1.27276	down	-1.27276
MIR4540	0.00441189	3.28245e-05	-1.63862	down	-1.63862	0.263096	0.115187	-0.637663	down	-0.637663
MIR4476	0.00441189	3.28245e-05	-1.63862	down	-1.63862	0.263096	0.115187	-0.637663	down	-0.637663
NRIR	0.00441189	3.27338e-05	-1.45023	down	-1.45023	0.000735996	9.77323e-06	-1.04827	down	-1.04827
CMPK2	0.00441189	3.27338e-05	-1.45023	down	-1.45023	0.000735996	9.77323e-06	-1.04827	down	-1.04827
PAX5	0.00441189	3.28245e-05	-1.63862	down	-1.63862	0.263096	0.115187	-0.637663	down	-0.637663
RSAD2	0.00441189	3.27338e-05	-1.45023	down	-1.45023	0.000735996	9.77323e-06	-1.04827	down	-1.04827
SH3YL1	0.00450892	3.44215e-05	1.48104	up	1.48104	0.0279061	0.00300928	-0.635465	down	-0.635465
ACP1	0.00450892	3.44215e-05	1.48104	up	1.48104	0.0279061	0.00300928	-0.635465	down	-0.635465
DYNC2I2	0.00450892	3.42267e-05	1.13408	up	1.13408	0.313444	0.15392	0.693316	up	0.693316
VTI1B	0.00467564	3.59967e-05	2.14997	up	2.14997	0.0194731	0.0016943	0.663533	mixed	0.663533
RDH11	0.00467564	3.59967e-05	2.14997	up	2.14997	0.0194731	0.0016943	0.663533	mixed	0.663533
TSFM	0.00470741	3.89822e-05	2.20894	up	2.20894	0.753042	0.598317	0.367349	mixed	0.367349
LOC105372562	0.00470741	3.84097e-05	-1.45127	down	-1.45127
LOC124902695	0.00470741	3.81513e-05	1.23406	up	1.23406	0.000255236	1.85106e-06	0.964449	up	0.964449
PIWIL4	0.00470741	3.78594e-05	1.24443	up	1.24443	0.575036	0.394308	-0.677113	down	-0.677113
CYP27B1	0.00470741	3.89822e-05	2.20894	up	2.20894	0.374876	0.205262	0.712675	up	0.712675
SLC37A2	0.00470741	3.82802e-05	-1.7857	down	-1.7857	0.442459	0.264736	0.539907	up	0.539907
KDM2A	0.00470741	3.81513e-05	1.23406	up	1.23406	0.000255236	1.85106e-06	0.964449	up	0.964449
FUT4	0.00470741	3.78594e-05	1.24443	up	1.24443	0.575036	0.394308	-0.677113	down	-0.677113
EEF1AKMT3	0.00470741	3.89822e-05	2.20894	up	2.20894	0.753042	0.598317	0.367349	mixed	0.367349
LOC284788	0.00470741	3.84097e-05	-1.45127	down	-1.45127
METTL1	0.00470741	3.89822e-05	2.20894	up	2.20894	0.374876	0.205262	0.712675	up	0.712675
CGN	0.00470741	3.66446e-05	-1.81356	down	-1.81356	0.131531	0.0378883	0.929441	up	0.929441
TUFT1	0.00470741	3.66446e-05	-1.81356	down	-1.81356	0.131531	0.0378883	0.929441	up	0.929441
AHNAK	0.00470741	3.75156e-05	1.89428	up	1.89428	0.227486	0.0913895	-0.938348	mixed	-0.938348
SYT7	0.00470741	3.78448e-05	1.9522	up	1.9522	0.413246	0.239012	-0.768955	down	-0.768955
TM4SF19-DYNLT2B	0.00472801	4.15998e-05	-0.922353	down	-0.922353	0.0549317	0.00889197	-0.72513	down	-0.72513
TM4SF19-AS1	0.00472801	4.15998e-05	-0.922353	down	-0.922353	0.0442028	0.00615598	-0.72513	down	-0.72513
LOC107985250	0.00472801	4.10168e-05	-1.14616	down	-1.14616	0.860013	0.736287	0.230007	mixed	0.230007
GLCCI1	0.00472801	3.97313e-05	-1.75276	down	-1.75276	0.00153514	2.85639e-05	-0.851906	down	-0.851906
TM4SF19	0.00472801	4.15998e-05	-0.922353	down	-0.922353	0.0549317	0.00889197	-0.72513	down	-0.72513
JDP2	0.00472801	4.04334e-05	-1.23505	down	-1.23505	0.535342	0.351555	-0.493917	mixed	-0.493917
PIWIL4	0.00472801	4.03833e-05	1.24443	up	1.24443	0.575036	0.394308	-0.677113	down	-0.677113
FUT4	0.00472801	4.03833e-05	1.24443	up	1.24443	0.575036	0.394308	-0.677113	down	-0.677113
SLC41A1	0.00472801	4.10168e-05	-1.14616	down	-1.14616	0.860013	0.736287	0.230007	mixed	0.230007
DYNLT2B	0.00472801	4.15998e-05	-0.922353	down	-0.922353	0.0549317	0.00889197	-0.72513	down	-0.72513
PM20D1-AS1	0.00472801	4.10168e-05	-1.14616	down	-1.14616	0.860013	0.736287	0.230007	mixed	0.230007
SLC35E2B	0.00472801	4.09814e-05	1.3297	up	1.3297	0.504551	0.322228	0.476749	up	0.476749
UMAD1	0.00472801	3.97313e-05	-1.75276	down	-1.75276	0.00153514	2.85639e-05	-0.851906	down	-0.851906
CDK11B	0.00472801	4.09814e-05	1.3297	up	1.3297	0.504551	0.322228	0.476749	up	0.476749
C1orf216	0.00475093	4.24163e-05	-1.03363	down	-1.03363	0.00514465	0.000192616	-1.40086	down	-1.40086
UBR2	0.00475093	4.21117e-05	1.72476	up	1.72476	0.00915937	0.000466334	1.00282	up	1.00282
CLSPN	0.00475093	4.24163e-05	-1.03363	down	-1.03363	0.00514465	0.000192616	-1.40086	down	-1.40086
CSNK2A1	0.00506384	4.55375e-05	-1.39954	down	-1.39954	0.262672	0.114934	-0.852198	down	-0.852198
FOS	0.00519405	4.70445e-05	0.880961	up	0.880961	0.0930362	0.0213999	0.864277	up	0.864277
TSFM	0.00520239	4.74566e-05	2.20894	up	2.20894	0.753042	0.598317	0.367349	mixed	0.367349
EEF1AKMT3	0.00520239	4.74566e-05	2.20894	up	2.20894	0.753042	0.598317	0.367349	mixed	0.367349
HOGA1	0.00536257	4.92648e-05	-1.15408	down	-1.15408	0.044718	0.00625669	-0.999342	down	-0.999342
ANKRD2	0.00536257	4.92648e-05	-1.15408	down	-1.15408	0.044718	0.00625669	-0.999342	down	-0.999342
C10orf62	0.00536257	4.92648e-05	-1.15408	down	-1.15408	0.044718	0.00625669	-0.999342	down	-0.999342
PI4K2A	0.00536257	4.92648e-05	-1.15408	down	-1.15408	0.044718	0.00625669	-0.999342	down	-0.999342
CANT1	0.0053987	4.99459e-05	-1.1859	down	-1.1859	0.0447118	0.00625293	-1.08076	down	-1.08076
ERCC6	0.00554195	5.16298e-05	-0.889103	down	-0.889103	0.390836	0.219063	-0.381042	down	-0.381042
COX6B2	0.00560108	5.29053e-05	1.32769	up	1.32769	0.607157	0.42888	-0.403644	mixed	-0.403644
GARIN5B	0.00560108	5.29053e-05	1.32769	up	1.32769	0.0530807	0.00837574	1.19232	up	1.19232
IL11	0.00560108	5.29053e-05	1.32769	up	1.32769	0.0530807	0.00837574	1.19232	up	1.19232
BCL2L1	0.00560108	5.27507e-05	-1.85967	down	-1.85967	0.973563	0.921317	0.0296129	mixed	0.0296129
GJA9-MYCBP	0.00580894	5.62841e-05	-0.92834	down	-0.92834	0.0192733	0.00166476	-0.896411	down	-0.896411
RBBP9	0.00580894	5.53384e-05	-0.782583	down	-0.782583	0.0361033	0.00448543	-0.76307	down	-0.76307
MYCBP	0.00580894	5.62841e-05	-0.92834	down	-0.92834	0.0192733	0.00166476	-0.896411	down	-0.896411
MXRA8	0.00580894	5.67477e-05	1.47231	up	1.47231
RRAGC	0.00580894	5.62841e-05	-0.92834	down	-0.92834	0.0192733	0.00166476	-0.896411	down	-0.896411
GJA9	0.00580894	5.62841e-05	-0.92834	down	-0.92834	0.0192733	0.00166476	-0.896411	down	-0.896411
GGH	0.00580894	5.64639e-05	-0.938381	down	-0.938381	0.520938	0.338114	-0.461462	down	-0.461462
POLQ	0.0062355	6.13183e-05	-1.27394	down	-1.27394	0.174755	0.0605268	0.833421	up	0.833421
LOC124902695	0.00633129	6.30326e-05	1.23406	up	1.23406	0.000255236	1.85106e-06	0.964449	up	0.964449
COX6B2	0.00633129	6.30794e-05	1.32769	up	1.32769	0.607157	0.42888	-0.403644	mixed	-0.403644
KDM2A	0.00633129	6.30326e-05	1.23406	up	1.23406	0.000255236	1.85106e-06	0.964449	up	0.964449
GARIN5B	0.00633129	6.30794e-05	1.32769	up	1.32769	0.0530807	0.00837574	1.19232	up	1.19232
IRX2-DT	0.00635639	6.37407e-05	-1.69413	down	-1.69413	0.906458	0.806641	-0.114437	mixed	-0.114437
TNFRSF18	0.0064405	6.50009e-05	1.86538	up	1.86538
SH3PXD2B	0.00644554	6.54687e-05	-1.48446	down	-1.48446	0.10297	0.025279	0.940352	up	0.940352
MIR6870	0.00663394	6.78115e-05	1.27082	up	1.27082	0.110532	0.0282738	-1.01952	down	-1.01952
JAG1	0.00663394	6.78115e-05	1.27082	up	1.27082	0.110532	0.0282738	-1.01952	down	-1.01952
APEX2	0.00669603	6.93126e-05	-1.13128	down	-1.13128	0.93247	0.844489	-0.0662272	down	-0.0662272
PFKFB1	0.00669603	6.93126e-05	-1.13128	down	-1.13128	0.93247	0.844489	-0.0662272	down	-0.0662272
LOC101927245	0.00678391	7.08757e-05	-1.49987	down	-1.49987	0.574936	0.394128	0.485295	mixed	0.485295
GLCCI1	0.00678391	7.15163e-05	-1.75276	down	-1.75276	0.00153514	2.85639e-05	-0.851906	down	-0.851906
ACSF3	0.00678391	7.15389e-05	-1.14205	down	-1.14205	0.0799511	0.0164998	1.12751	up	1.12751
LINC00304	0.00678391	7.15389e-05	-1.14205	down	-1.14205	0.0799511	0.0164998	1.12751	up	1.12751
LINC02138	0.00678391	7.15389e-05	-1.14205	down	-1.14205	0.0799511	0.0164998	1.12751	up	1.12751
UMAD1	0.00678391	7.15163e-05	-1.75276	down	-1.75276	0.00153514	2.85639e-05	-0.851906	down	-0.851906
IGF2BP3	0.00680533	7.22051e-05	-1.5191	down	-1.5191	0.147878	0.0459107	0.631672	mixed	0.631672
LOC105372217	0.00685818	7.32095e-05	1.74392	up	1.74392
LINC02983	0.00690522	7.59329e-05	1.61206	up	1.61206	0.0122001	0.000765245	0.777812	up	0.777812
LOC105377975	0.00690522	7.59454e-05	-1.45487	down	-1.45487	0.769549	0.618988	-0.174563	mixed	-0.174563
EFEMP2	0.00690522	7.447e-05	1.20159	up	1.20159	0.428904	0.252569	0.710728	up	0.710728
MAN1A1	0.00690522	7.59454e-05	-1.45487	down	-1.45487	0.769549	0.618988	-0.174563	mixed	-0.174563
PGM2	0.00690522	7.4842e-05	-1.34047	down	-1.34047	0.324498	0.162858	-0.642973	down	-0.642973
FBXL18	0.00690522	7.59329e-05	1.61206	up	1.61206	0.0122001	0.000765245	0.777812	up	0.777812
TNRC18	0.00690522	7.59329e-05	1.61206	up	1.61206	0.0122001	0.000765245	0.777812	up	0.777812
SDK1	0.00707482	7.82684e-05	-1.52281	down	-1.52281	0.0190099	0.00162342	-1.36177	down	-1.36177
RPL37A-DT	0.00718606	8.36832e-05	-1.01124	down	-1.01124	0.483909	0.303517	-0.391864	down	-0.391864
LOC101928156	0.00718606	8.36832e-05	-1.01124	down	-1.01124	0.483909	0.303517	-0.391864	down	-0.391864
LOC101928180	0.00718606	8.36832e-05	-1.01124	down	-1.01124	0.483909	0.303517	-0.391864	down	-0.391864
LOC105375846	0.00718606	8.17153e-05	-1.08182	down	-1.08182	0.101299	0.0246064	-0.954982	down	-0.954982
BLCAP	0.00718606	8.144e-05	0.87156	up	0.87156	0.259908	0.113001	0.523246	up	0.523246
TMEM68	0.00718606	8.17153e-05	-1.08182	down	-1.08182	0.101299	0.0246064	-0.954982	down	-0.954982
KLHDC2	0.00718606	8.35205e-05	1.42716	up	1.42716	0.572603	0.391681	-0.43569	down	-0.43569
OAS1	0.00718606	8.20532e-05	-1.39691	down	-1.39691
RPL37A	0.00718606	8.36832e-05	-1.01124	down	-1.01124	0.483909	0.303517	-0.391864	down	-0.391864
TGS1	0.00718606	8.17153e-05	-1.08182	down	-1.08182	0.101299	0.0246064	-0.954982	down	-0.954982
TRIM68	0.00722887	8.46494e-05	-0.877335	down	-0.877335	0.00245848	6.20694e-05	-1.15678	down	-1.15678
PDRG1	0.00732422	8.62398e-05	-0.792966	down	-0.792966	9.55409e-05	5.1985e-07	-1.1099	down	-1.1099
LOC124904962	0.00737252	8.82394e-05	1.66069	up	1.66069
LOC124904963	0.00737252	8.82394e-05	1.66069	up	1.66069
EPB41L4A	0.00737252	8.74943e-05	-1.36071	down	-1.36071	0.925589	0.832239	-0.243778	mixed	-0.243778
RBL1	0.00740274	8.908e-05	-0.951787	down	-0.951787	0.0450414	0.00633987	-0.879599	down	-0.879599
PAK1	0.00750997	9.08562e-05	-1.28996	down	-1.28996	0.155833	0.0500232	-0.856938	down	-0.856938
ZG16B	0.00764821	9.30234e-05	1.71845	up	1.71845	0.402807	0.229217	-0.607439	mixed	-0.607439
LOC124903628	0.00764821	9.30234e-05	1.71845	up	1.71845	0.402807	0.229217	-0.607439	mixed	-0.607439
AFG2B	0.007682	9.39314e-05	-1.11828	down	-1.11828	0.278227	0.125957	-0.486584	down	-0.486584
NPR2	0.00770882	9.4758e-05	1.3035	up	1.3035	0.0361738	0.00450814	1.2167	up	1.2167
RGP1	0.00770882	9.4758e-05	1.3035	up	1.3035	0.0361738	0.00450814	1.2167	up	1.2167
IRX2	0.0077125	9.56111e-05	-1.69413	down	-1.69413	0.756893	0.602896	-0.527724	mixed	-0.527724
EDEM1	0.0077125	9.58012e-05	-1.57923	down	-1.57923	0.08875	0.0196207	-0.911842	down	-0.911842
GJA9-MYCBP	0.00775499	9.84971e-05	-0.92834	down	-0.92834	0.0192733	0.00166476	-0.896411	down	-0.896411
LOC105378662	0.00775499	9.84971e-05	-0.92834	down	-0.92834	0.0243536	0.00239309	-0.896411	down	-0.896411
RRAGC-DT	0.00775499	9.84971e-05	-0.92834	down	-0.92834	0.0243536	0.00239309	-0.896411	down	-0.896411
MYCBP	0.00775499	9.84971e-05	-0.92834	down	-0.92834	0.0192733	0.00166476	-0.896411	down	-0.896411
MYO18A	0.00775499	9.74271e-05	1.57892	up	1.57892	0.476426	0.295737	0.637885	up	0.637885
RPS4X	0.00775499	9.88376e-05	-1.32815	down	-1.32815	0.154625	0.0493831	-0.607756	down	-0.607756
RRAGC	0.00775499	9.84971e-05	-0.92834	down	-0.92834	0.0192733	0.00166476	-0.896411	down	-0.896411
GJA9	0.00775499	9.84971e-05	-0.92834	down	-0.92834	0.0192733	0.00166476	-0.896411	down	-0.896411
GABARAPL2	0.00789159	0.0001016	2.24835	up	2.24835	0.837186	0.703421	0.465464	up	0.465464
GATM	0.00789159	0.000101547	-1.11828	down	-1.11828	0.278227	0.125957	-0.486584	down	-0.486584
TM4SF19-DYNLT2B	0.00790353	0.000102776	-0.922353	down	-0.922353	0.0549317	0.00889197	-0.72513	down	-0.72513
ATG14	0.00790353	0.000102466	1.46159	up	1.46159	0.364176	0.195558	0.37864	up	0.37864
DYNLT2B	0.00790353	0.000102776	-0.922353	down	-0.922353	0.0549317	0.00889197	-0.72513	down	-0.72513
TBPL2	0.00790353	0.000102466	1.46159	up	1.46159	0.364176	0.195558	0.37864	up	0.37864
PCYT1A	0.00790353	0.000102776	-0.922353	down	-0.922353	0.0775942	0.0157319	-0.72513	down	-0.72513
TRABD2B	0.00794451	0.000104337	1.37342	up	1.37342	0.71502	0.551387	0.314129	up	0.314129
GNG8	0.00794451	0.000104001	1.66515	up	1.66515	0.277353	0.125202	0.580458	up	0.580458
BAD	0.00804796	0.000106216	2.09862	up	2.09862	0.00225922	5.32673e-05	1.369	up	1.369
MEN1	0.0083229	0.000110383	1.81476	up	1.81476	0.0652891	0.0117739	1.0312	up	1.0312
MAP4K2	0.0083229	0.000110383	1.81476	up	1.81476	0.0652891	0.0117739	1.0312	up	1.0312
ARFGEF2	0.00840344	0.000111995	-1.25781	down	-1.25781	0.0341065	0.00412027	0.734595	up	0.734595
KCNK4-CATSPERZ	0.00874479	0.00011711	2.09862	up	2.09862	0.00242578	5.97898e-05	1.369	up	1.369
KCNK4	0.00874479	0.00011711	2.09862	up	2.09862	0.00242578	5.97898e-05	1.369	up	1.369
PLCB3	0.00874479	0.00011711	2.09862	up	2.09862	0.00242578	5.97898e-05	1.369	up	1.369
GPR137	0.00874479	0.00011711	2.09862	up	2.09862	0.00242578	5.97898e-05	1.369	up	1.369
LOC100271832	0.00916391	0.000123316	-1.58817	down	-1.58817	0.201896	0.0762841	0.550154	up	0.550154
LTBP1	0.00916391	0.000123316	-1.58817	down	-1.58817	0.201896	0.0762841	0.550154	up	0.550154
TRAFD1	0.00946787	0.000128019	1.62498	up	1.62498	0.280469	0.128135	-0.430597	mixed	-0.430597
VEGFA	0.00952653	0.000129428	-1.47605	down	-1.47605	0.535667	0.352056	-0.557485	down	-0.557485
DPEP1	0.00982419	0.000134743	1.84508	up	1.84508
DAZAP1	0.00982419	0.00013417	-1.16302	down	-1.16302	0.025727	0.00262469	1.31354	up	1.31354
RPS15	0.00982419	0.00013417	-1.16302	down	-1.16302	0.025727	0.00262469	1.31354	up	1.31354
LINC02983	0.00994016	0.000136977	1.61206	up	1.61206	0.0122001	0.000765245	0.777812	up	0.777812
TNRC18	0.00994016	0.000136977	1.61206	up	1.61206	0.0122001	0.000765245	0.777812	up	0.777812
ACTR3-AS1	0.00997912	0.00013816	-1.37974	down	-1.37974	0.96919	0.910366	0.0305668	mixed	0.0305668
LOC124906071	0.00997912	0.00013816	-1.37974	down	-1.37974	0.96919	0.910366	0.0305668	mixed	0.0305668
CRACDL	0.0100564	0.000139881	-1.47836	down	-1.47836	0.022985	0.00219011	-1.09472	down	-1.09472
LOC105376314	0.0101074	0.000141837	-1.35484	down	-1.35484
FBXO45	0.0101074	0.000143859	-0.994828	down	-0.994828	0.256317	0.110725	0.81188	up	0.81188
PPP1R16B	0.0101074	0.000142789	-1.30289	down	-1.30289
WDR53	0.0101074	0.000143859	-0.994828	down	-0.994828	0.256317	0.110725	0.81188	up	0.81188
PTPRF	0.0101074	0.000142113	-1.09992	down	-1.09992	0.188919	0.0684189	-0.716247	down	-0.716247
SUSD6	0.0103247	0.000147619	-1.58277	down	-1.58277	0.395487	0.223364	-0.701637	down	-0.701637
TOB1-AS1	0.010693	0.000153577	-1.72171	down	-1.72171	0.0819446	0.0172556	-0.893132	down	-0.893132
LOC107987011	0.01083	0.000156946	-0.778569	down	-0.778569	0.367359	0.198732	-0.407056	down	-0.407056
STX17-DT	0.01083	0.000156946	-0.778569	down	-0.778569	0.367359	0.198732	-0.407056	down	-0.407056
STX17	0.01083	0.000156946	-0.778569	down	-0.778569	0.367359	0.198732	-0.407056	down	-0.407056
LOC105376020	0.0108351	0.000158422	1.73061	up	1.73061
AQP7	0.0108351	0.000158422	1.73061	up	1.73061
MAP4K5	0.0111809	0.000164201	1.85086	up	1.85086	0.0674477	0.0123772	-0.921467	down	-0.921467
CDKL1	0.0111809	0.000164201	1.85086	up	1.85086	0.0674477	0.0123772	-0.921467	down	-0.921467
HMG20A	0.011258	0.000166791	-1.14238	down	-1.14238	0.611615	0.434248	0.594062	up	0.594062
PEAK1	0.011258	0.000166791	-1.14238	down	-1.14238	0.611615	0.434248	0.594062	up	0.594062
MGC15885	0.0115857	0.000172395	1.81997	up	1.81997
CAMTA1	0.0121686	0.000183431	-1.47748	down	-1.47748	0.125	0.0348391	-0.718212	down	-0.718212
ZMIZ1-AS1	0.0121686	0.000183189	1.63016	up	1.63016	0.25487	0.10951	-0.615331	down	-0.615331
GRHL2	0.0121686	0.000182177	1.02548	up	1.02548	0.180179	0.0635564	0.94725	up	0.94725
VAMP3	0.0121686	0.000183431	-1.47748	down	-1.47748	0.125	0.0348391	-0.718212	down	-0.718212
SNHG16	0.0121765	0.000184337	1.17267	up	1.17267	0.0299185	0.0033779	1.40154	up	1.40154
LOC105274304	0.0121765	0.000184337	1.17267	up	1.17267	0.0545832	0.00878253	1.40154	up	1.40154
ADAT1	0.0126971	0.000193039	2.24835	up	2.24835	0.118822	0.0319461	-0.666206	down	-0.666206
CHST5	0.0126971	0.000193039	2.24835	up	2.24835	0.675248	0.504421	-0.734931	down	-0.734931
TMEM231	0.0126971	0.000193039	2.24835	up	2.24835	0.118822	0.0319461	-0.666206	down	-0.666206
ZNF217	0.012742	0.000194547	1.06009	up	1.06009	0.112177	0.0290505	0.753328	up	0.753328
DLGAP1-AS1	0.0128207	0.000196579	1.702	up	1.702	0.0987178	0.02358	-1.04375	down	-1.04375
EVX1-AS	0.0129259	0.000200699	1.59375	up	1.59375
EVX1	0.0129259	0.000200699	1.59375	up	1.59375
SMAD7	0.0129259	0.000199847	1.45032	up	1.45032	0.0218205	0.00200929	1.33865	up	1.33865
FIGNL1	0.0132449	0.000206509	-1.00132	down	-1.00132	0.000503855	5.58099e-06	-1.20511	down	-1.20511
EPHX1	0.013515	0.000211595	-1.02311	down	-1.02311	0.407881	0.2334	0.51565	up	0.51565
MIR5688	0.0135265	0.000212651	-1.36645	down	-1.36645
CADM2	0.0135265	0.000212651	-1.36645	down	-1.36645
PCAT29	0.0137813	0.000221157	-1.29321	down	-1.29321	0.664054	0.491496	-0.312122	down	-0.312122
MAD2L2	0.0137813	0.000220175	-1.10092	down	-1.10092	0.363705	0.195257	-0.61471	mixed	-0.61471
ZNF460-AS1	0.0137813	0.000222006	1.93339	up	1.93339	0.0141121	0.000970789	0.823014	up	0.823014
ZNF460	0.0137813	0.000222006	1.93339	up	1.93339	0.0141121	0.000970789	0.823014	up	0.823014
LINC00618	0.0137813	0.000220264	-0.920604	down	-0.920604	0.0916487	0.0209015	-0.714734	down	-0.714734
DRAIC	0.0137813	0.000221157	-1.29321	down	-1.29321	0.664054	0.491496	-0.312122	down	-0.312122
DDX11	0.0137813	0.000221068	-1.19527	down	-1.19527	0.186997	0.0671609	-0.652221	down	-0.652221
LINC00593	0.0137813	0.000221157	-1.29321	down	-1.29321
VRK1	0.0137813	0.000220264	-0.920604	down	-0.920604	0.0916487	0.0209015	-0.714734	down	-0.714734
SAYSD1	0.0144917	0.000234388	-1.02036	down	-1.02036	0.682456	0.512748	-0.348321	down	-0.348321
PIGH	0.0145326	0.000235989	-0.804221	down	-0.804221	0.781079	0.633023	-0.143139	down	-0.143139
RASEF	0.0145329	0.000236935	-1.08218	down	-1.08218
MIR4296	0.0158091	0.000258763	-1.37621	down	-1.37621	0.206663	0.0787855	0.999557	mixed	0.999557
CTBP2	0.0158091	0.000258763	-1.37621	down	-1.37621	0.206663	0.0787855	0.999557	mixed	0.999557
CCDC93	0.0161147	0.000264807	-0.925457	down	-0.925457	0.736852	0.57815	0.250338	up	0.250338
PIN4	0.0162616	0.000268273	-1.32815	down	-1.32815	0.0378006	0.00485547	-1.13018	down	-1.13018
EMILIN1	0.0162954	0.000269885	-1.19225	down	-1.19225	0.138149	0.041477	0.583295	mixed	0.583295
KHK	0.0162954	0.000269885	-1.19225	down	-1.19225	0.138149	0.041477	0.583295	mixed	0.583295
RAD51-AS1	0.016333	0.000274735	-1.04735	down	-1.04735	0.000255236	1.85169e-06	-1.47352	down	-1.47352
BATF	0.016333	0.000273497	-1.1768	down	-1.1768
BACE1	0.016333	0.000273166	-0.966433	down	-0.966433	0.0230515	0.00220242	1.05129	up	1.05129
RAD51	0.016333	0.000274735	-1.04735	down	-1.04735	0.000255236	1.85169e-06	-1.47352	down	-1.47352
PCAT1	0.0167908	0.00028432	-1.53941	down	-1.53941	7.10444e-05	3.63551e-07	-1.72349	down	-1.72349
PRNCR1	0.0167908	0.00028432	-1.53941	down	-1.53941	0.023321	0.00224327	-1.38293	down	-1.38293
GTF2A1-AS1	0.0167908	0.000285694	1.4759	up	1.4759	0.322333	0.161188	-0.729713	down	-0.729713
CASC21	0.0167908	0.00028432	-1.53941	down	-1.53941	7.10444e-05	3.63551e-07	-1.72349	down	-1.72349
LOC105375751	0.0167908	0.00028432	-1.53941	down	-1.53941	0.000311806	2.72663e-06	-1.72349	down	-1.72349
GTF2A1	0.0167908	0.000285694	1.4759	up	1.4759	0.322333	0.161188	-0.729713	down	-0.729713
SNORA79	0.0167908	0.000285694	1.4759	up	1.4759	0.322333	0.161188	-0.729713	down	-0.729713
SNORD15B	0.0168385	0.000290344	-0.897221	down	-0.897221	0.256286	0.110581	-0.737565	down	-0.737565
FANCG	0.0168385	0.000290155	-1.21965	down	-1.21965	0.0535727	0.00849501	-0.801485	down	-0.801485
CPA4	0.0168385	0.000290863	1.63418	up	1.63418
SNORD15A	0.0168385	0.000290344	-0.897221	down	-0.897221	0.256286	0.110581	-0.737565	down	-0.737565
RPS3	0.0168385	0.000290344	-0.897221	down	-0.897221	0.256286	0.110581	-0.737565	down	-0.737565
VCP	0.0168385	0.000290155	-1.21965	down	-1.21965	0.0535727	0.00849501	-0.801485	down	-0.801485
RNASEH2C	0.0168638	0.000292392	-0.886856	down	-0.886856	0.265825	0.117209	0.511917	up	0.511917
RMRP	0.0172827	0.000301891	-1.56199	down	-1.56199	0.363698	0.1952	-0.475285	down	-0.475285
ASPSCR1	0.0172827	0.000301051	1.0054	up	1.0054	0.948709	0.873245	0.841087	up	0.841087
ARHGEF39	0.0172827	0.000301891	-1.56199	down	-1.56199	0.363698	0.1952	-0.475285	down	-0.475285
BUB1B-PAK6	0.0173676	0.000306745	1.83742	up	1.83742	0.192261	0.0704622	0.920659	up	0.920659
HSPBP1	0.0173676	0.000305054	-1.14987	down	-1.14987	0.0697804	0.0130395	-0.640817	down	-0.640817
PAK6	0.0173676	0.000306745	1.83742	up	1.83742	0.192261	0.0704622	0.920659	up	0.920659
BUB1B	0.0173676	0.000306745	1.83742	up	1.83742	0.192261	0.0704622	0.920659	up	0.920659
MOSPD2	0.017556	0.000315751	-0.954568	down	-0.954568	0.057982	0.00978761	-0.837757	down	-0.837757
FANCB	0.017556	0.000315751	-0.954568	down	-0.954568	0.057982	0.00978761	-0.837757	down	-0.837757
UNC5B	0.017556	0.00031318	-1.48394	down	-1.48394	0.224853	0.0898654	-0.656946	down	-0.656946
TSEN54	0.017556	0.000311423	-1.21088	down	-1.21088	0.104216	0.0257774	-0.893519	down	-0.893519
LLGL2	0.017556	0.000311423	-1.21088	down	-1.21088	0.104216	0.0257774	-0.893519	down	-0.893519
TCF15	0.017556	0.000314027	-1.30455	down	-1.30455	0.302938	0.145601	-0.529244	down	-0.529244
MICALL2-DT	0.0177744	0.000321272	1.12306	up	1.12306	0.155488	0.0498552	-0.661783	down	-0.661783
CA14	0.0177744	0.00032198	-1.33014	down	-1.33014	0.188476	0.0681851	-0.736666	down	-0.736666
PNKP	0.018107	0.000330549	1.29595	up	1.29595	0.0428048	0.00585657	0.783312	up	0.783312
PRPF6	0.018107	0.00033269	1.24941	up	1.24941	0.428352	0.252078	0.538734	up	0.538734
DHRS7B	0.018107	0.000329424	-0.968347	down	-0.968347	0.857805	0.731633	0.299077	mixed	0.299077
C20orf204	0.018107	0.00033269	1.24941	up	1.24941	0.428352	0.252078	0.538734	up	0.538734
CFAP73	0.018107	0.000332207	-1.46467	down	-1.46467	0.982755	0.946726	-0.0197436	down	-0.0197436
AKT1S1	0.018107	0.000330549	1.29595	up	1.29595	0.0428048	0.00585657	0.783312	up	0.783312
ZWINT	0.018138	0.000336805	-0.808325	down	-0.808325	0.0116898	0.000717075	-0.777899	down	-0.777899
LOC124902546	0.018138	0.000336805	-0.808325	down	-0.808325	0.0116898	0.000717075	-0.777899	down	-0.777899
PIGV	0.018138	0.00033487	1.0151	up	1.0151	0.54329	0.359941	0.432738	mixed	0.432738
YBX3	0.018138	0.000337953	1.01179	up	1.01179	0.157005	0.0507484	-0.563642	down	-0.563642
SPO11	0.0182391	0.000341017	-1.06603	down	-1.06603	0.0916693	0.0209294	-0.637317	down	-0.637317
ATG7	0.0188226	0.000353144	-1.0739	down	-1.0739	0.00904573	0.000459376	-0.859196	down	-0.859196
PRKAR2A-AS1	0.0188574	0.000358677	-1.44472	down	-1.44472	0.853945	0.726335	0.230148	mixed	0.230148
NKX2-8	0.0188574	0.000356661	1.63628	up	1.63628	0.890809	0.781867	0.270678	mixed	0.270678
PRKAR2A	0.0188574	0.000358677	-1.44472	down	-1.44472	0.853945	0.726335	0.230148	mixed	0.230148
SMOC1	0.0188574	0.000358471	-1.35982	down	-1.35982
HNRNPUL1	0.0188638	0.00036196	2.0136	up	2.0136	0.00407458	0.000132706	1.93303	up	1.93303
AXL	0.0188638	0.00036196	2.0136	up	2.0136	0.00407458	0.000132706	1.93303	up	1.93303
MICALL2	0.0188638	0.00036246	1.12306	up	1.12306	0.156817	0.0505679	-0.561538	mixed	-0.561538
BRSK1	0.0188638	0.000360518	-1.14987	down	-1.14987	0.0697804	0.0130395	-0.640817	down	-0.640817
CCDC97	0.0188638	0.00036196	2.0136	up	2.0136	0.00407458	0.000132706	1.93303	up	1.93303
TMEM246-AS1	0.0188756	0.000363908	-1.31575	down	-1.31575
LSR	0.018997	0.000367478	1.52541	up	1.52541	0.0920664	0.02106	0.513443	up	0.513443
HAMP	0.018997	0.000367478	1.52541	up	1.52541	0.113396	0.0295794	0.959423	up	0.959423
USF2	0.018997	0.000367478	1.52541	up	1.52541	0.0920664	0.02106	0.513443	up	0.513443
MCM3	0.0190156	0.000369068	-1.16434	down	-1.16434	0.000317538	2.82878e-06	-1.28321	down	-1.28321
SMG1P3	0.019322	0.000376272	1.11987	up	1.11987	0.205157	0.0779539	-0.867479	down	-0.867479
SLC7A5P2	0.019322	0.000376272	1.11987	up	1.11987	0.205157	0.0779539	-0.867479	down	-0.867479
SRSF5	0.019322	0.000377514	-1.24863	down	-1.24863	0.210446	0.081276	-0.567528	down	-0.567528
SCAF8	0.0194434	0.000381145	1.08719	up	1.08719	0.0279698	0.00302018	-1.30422	down	-1.30422
TIAM2	0.0194434	0.000381145	1.08719	up	1.08719	0.0279698	0.00302018	-1.30422	down	-1.30422
MIR1282	0.0195355	0.000384214	-1.19396	down	-1.19396	0.0672639	0.0123171	1.15949	up	1.15949
SERINC4	0.0195355	0.000384214	-1.19396	down	-1.19396	0.0672639	0.0123171	1.15949	up	1.15949
ELL3	0.0195355	0.000384214	-1.19396	down	-1.19396	0.0672639	0.0123171	1.15949	up	1.15949
KIF22	0.0198061	0.000390818	0.977761	up	0.977761	0.1493	0.0466914	0.915038	up	0.915038
MAZ	0.0198061	0.000390818	0.977761	up	0.977761	0.1493	0.0466914	0.915038	up	0.915038
ALDH18A1	0.0199687	0.000395317	1.09072	up	1.09072	0.0652123	0.0117347	0.94352	up	0.94352
HOXA1	0.0201331	0.000399874	1.55982	up	1.55982	0.110831	0.0284285	0.999474	up	0.999474
PRPSAP1	0.0201639	0.00040179	2.28862	up	2.28862	0.468758	0.288245	-0.41718	mixed	-0.41718
QRICH2	0.0201639	0.00040179	2.28862	up	2.28862	0.468758	0.288245	-0.41718	mixed	-0.41718
WARS2	0.0203241	0.000406298	-1.57926	down	-1.57926	0.0614913	0.0106907	-0.718364	down	-0.718364
ABHD17C	0.020415	0.000409437	-1.15638	down	-1.15638	0.927054	0.836199	-0.565278	down	-0.565278
HOTAIRM1	0.0204463	0.00041237	1.55982	up	1.55982	0.110831	0.0284285	0.999474	up	0.999474
C1QTNF3-AMACR	0.0204463	0.000422625	-0.92536	down	-0.92536	0.0568964	0.00947245	-0.766223	down	-0.766223
PTOV1-AS2	0.0204463	0.000418245	1.29595	up	1.29595	0.0476849	0.00702789	0.783312	up	0.783312
PTTG1IP2	0.0204463	0.000419729	-1.17531	down	-1.17531	0.0731802	0.0141315	-0.637193	down	-0.637193
PNKP	0.0204463	0.000418245	1.29595	up	1.29595	0.0428048	0.00585657	0.783312	up	0.783312
C1QTNF3	0.0204463	0.000422625	-0.92536	down	-0.92536	0.0568964	0.00947245	-0.766223	down	-0.766223
C2CD6	0.0204463	0.00042531	1.45279	up	1.45279	0.408877	0.234737	0.738969	up	0.738969
LOC158434	0.0204463	0.000414976	1.62052	up	1.62052
LOC158435	0.0204463	0.000414976	1.62052	up	1.62052	0.162925	0.0540024	-0.646323	down	-0.646323
AMACR	0.0204463	0.000422625	-0.92536	down	-0.92536	0.0568964	0.00947245	-0.766223	down	-0.766223
GLRX	0.0204463	0.00042555	1.69976	up	1.69976	0.280731	0.128273	-0.776394	down	-0.776394
WDR97	0.0204463	0.00042726	1.01298	up	1.01298	0.0752348	0.0148345	0.887579	up	0.887579
ERCC6L2	0.0204463	0.000414976	1.62052	up	1.62052	0.162925	0.0540024	-0.646323	down	-0.646323
SLC45A2	0.0204463	0.000422625	-0.92536	down	-0.92536	0.0568964	0.00947245	-0.766223	down	-0.766223
CDK14	0.0204463	0.000419729	-1.17531	down	-1.17531	0.0731802	0.0141315	-0.637193	down	-0.637193
MPP4	0.0204463	0.00042531	1.45279	up	1.45279	0.408877	0.234737	0.738969	up	0.738969
TMEM237	0.0204463	0.00042531	1.45279	up	1.45279	0.408877	0.234737	0.738969	up	0.738969
EVI5	0.0204463	0.000426501	-1.00607	down	-1.00607	0.0192733	0.00166782	-1.28564	down	-1.28564
SHARPIN	0.0204463	0.00042726	1.01298	up	1.01298	0.0752348	0.0148345	0.887579	up	0.887579
MAF1	0.0204463	0.00042726	1.01298	up	1.01298	0.0752348	0.0148345	0.887579	up	0.887579
AKT1S1	0.0204463	0.000418245	1.29595	up	1.29595	0.0428048	0.00585657	0.783312	up	0.783312
GTPBP10	0.0204463	0.000419729	-1.17531	down	-1.17531	0.0731802	0.0141315	-0.637193	down	-0.637193
CLDN12	0.0204463	0.000419729	-1.17531	down	-1.17531	0.0731802	0.0141315	-0.637193	down	-0.637193
SLC16A2	0.0206258	0.000432345	1.81613	up	1.81613	0.573922	0.393135	0.617133	up	0.617133
LOC105373164	0.0206854	0.000437023	-1.00884	down	-1.00884	0.0472903	0.0068739	-1.04857	down	-1.04857
LOC107987126	0.0206854	0.000435599	0.999133	up	0.999133	0.0039075	0.000123574	1.43579	up	1.43579
CRIP1	0.0206854	0.000437901	1.21058	up	1.21058	0.0755424	0.0149392	-0.638315	down	-0.638315
COG2	0.0206854	0.000437023	-1.00884	down	-1.00884	0.0472903	0.0068739	-1.04857	down	-1.04857
TEDC1	0.0206854	0.000437901	1.21058	up	1.21058	0.0755424	0.0149392	-0.638315	down	-0.638315
TBC1D15	0.0206854	0.000438948	-1.48364	down	-1.48364	0.0891967	0.0198237	-0.885879	down	-0.885879
FAM107A	0.0208201	0.000444211	-1.26425	down	-1.26425	0.8758	0.758846	0.154472	up	0.154472
WAC-AS1	0.0208201	0.00045416	-0.943378	down	-0.943378	0.408289	0.233871	-0.478565	down	-0.478565
CEP164	0.0208201	0.000455277	-0.966433	down	-0.966433	0.0317469	0.00367069	1.05129	up	1.05129
RNF19A	0.0208201	0.000451368	-1.13194	down	-1.13194	0.990813	0.966361	-0.0575074	mixed	-0.0575074
SNORA66	0.0208201	0.000450863	-0.862708	down	-0.862708	0.0985368	0.0234805	-1.01674	down	-1.01674
MAFG	0.0208201	0.00045231	-1.34513	down	-1.34513	0.0490618	0.00736976	1.03963	up	1.03963
PHF20L1	0.0208201	0.000447838	-0.984048	down	-0.984048	0.0470223	0.00681363	0.767748	up	0.767748
WAC	0.0208201	0.00045416	-0.943378	down	-0.943378	0.408289	0.233871	-0.478565	down	-0.478565
SIRT7	0.0208201	0.00045231	-1.34513	down	-1.34513	0.0490618	0.00736976	1.03963	up	1.03963
EBF4	0.0208201	0.000446255	-1.48202	down	-1.48202	0.587291	0.407809	0.400973	up	0.400973
PCYT2	0.0208201	0.00045231	-1.34513	down	-1.34513	0.0865643	0.0188739	1.33282	up	1.33282
SNORD21	0.0208201	0.000450863	-0.862708	down	-0.862708	0.0985368	0.0234805	-1.01674	down	-1.01674
RPL5	0.0208201	0.000450863	-0.862708	down	-0.862708	0.0985368	0.0234805	-1.01674	down	-1.01674
CYTH1	0.0208201	0.000448593	-0.929193	down	-0.929193	0.143019	0.0434858	-0.64731	down	-0.64731
ZNF605	0.0211389	0.000467404	1.70566	up	1.70566	0.0528876	0.00831292	1.26472	up	1.26472
TSKU-AS1	0.0211389	0.000467717	1.57344	up	1.57344	0.393158	0.221271	0.611219	up	0.611219
LOC124903064	0.0211389	0.000467404	1.70566	up	1.70566	0.995703	0.984816	0.00412157	mixed	0.00412157
CYP2F1	0.0211389	0.000464067	-1.02531	down	-1.02531	0.0366563	0.00458738	-0.694364	down	-0.694364
CHFR	0.0211389	0.000467404	1.70566	up	1.70566	0.0528876	0.00831292	1.26472	up	1.26472
INPP5B	0.0214238	0.000475408	-1.09441	down	-1.09441	0.0184062	0.00155114	-0.915149	down	-0.915149
MTF1	0.0214238	0.000475408	-1.09441	down	-1.09441	0.0184062	0.00155114	-0.915149	down	-0.915149
MRM2	0.0214705	0.000477832	-1.04506	down	-1.04506	0.0871773	0.0191148	-0.714684	down	-0.714684
MAD1L1	0.0214705	0.000477832	-1.04506	down	-1.04506	0.0871773	0.0191148	-0.714684	down	-0.714684
TRIM65	0.0216292	0.000482764	1.32118	up	1.32118	0.364648	0.196095	0.453388	up	0.453388
MRPL38	0.0216292	0.000482764	1.32118	up	1.32118	0.364648	0.196095	0.453388	up	0.453388
FBF1	0.0216292	0.000482764	1.32118	up	1.32118	0.0469698	0.00680221	1.41026	up	1.41026
TRIM47	0.0216292	0.000482764	1.32118	up	1.32118	0.586978	0.40564	0.464359	up	0.464359
LOC105374002	0.0218613	0.000490772	-1.06788	down	-1.06788	0.041102	0.00550317	-0.707575	down	-0.707575
LINC00973	0.0218613	0.000490772	-1.06788	down	-1.06788	0.041102	0.00550317	-0.707575	down	-0.707575
LOC124906343	0.0218613	0.000490772	-1.06788	down	-1.06788	0.041102	0.00550317	-0.707575	down	-0.707575
DCBLD2	0.0218613	0.000490772	-1.06788	down	-1.06788	0.041102	0.00550317	-0.707575	down	-0.707575
STEAP3	0.0219803	0.000494867	-1.23145	down	-1.23145	0.352178	0.18551	-0.753399	down	-0.753399
ZMYM5	0.0225009	0.000508043	1.27552	up	1.27552	0.101268	0.0245809	-0.579335	mixed	-0.579335
C1QTNF6	0.0226394	0.000512634	1.88959	up	1.88959	0.393436	0.221566	0.859972	up	0.859972
LOC105370664	0.0228999	0.00052446	-1.46027	down	-1.46027	0.201205	0.0757485	0.861128	up	0.861128
LOC124903383	0.0228999	0.00052446	-1.46027	down	-1.46027	0.201205	0.0757485	0.861128	up	0.861128
BIRC2	0.0228999	0.000524353	-0.960401	down	-0.960401	0.929264	0.840032	0.147289	mixed	0.147289
H1-10-AS1	0.0228999	0.0005223	1.55518	up	1.55518	0.000737001	9.88206e-06	1.51076	up	1.51076
WDR25	0.0228999	0.00052446	-1.46027	down	-1.46027	0.201205	0.0757485	0.861128	up	0.861128
H1-10	0.0228999	0.0005223	1.55518	up	1.55518	0.000737001	9.88206e-06	1.51076	up	1.51076
LINC01723	0.0229403	0.000527773	-1.27499	down	-1.27499
LINC01525	0.0229403	0.00053132	-1.14455	down	-1.14455
CFL2	0.0229403	0.000530854	0.880941	up	0.880941	0.292343	0.136836	0.9173	up	0.9173
TSKU	0.0229403	0.00053008	1.57344	up	1.57344	0.393158	0.221271	0.611219	up	0.611219
SPTLC3	0.0229403	0.000527773	-1.27499	down	-1.27499
MRPL2	0.0231591	0.000537886	1.44209	up	1.44209	0.00172029	3.39413e-05	1.55009	up	1.55009
CUL7	0.0231591	0.000537886	1.44209	up	1.44209	0.00172029	3.39413e-05	1.55009	up	1.55009
OTUD6B-AS1	0.0235508	0.000553078	-0.788758	down	-0.788758	0.000543681	6.1982e-06	-0.86821	down	-0.86821
PAX9	0.0235508	0.000548861	1.21049	up	1.21049	0.37752	0.207223	-0.492928	down	-0.492928
OTUD6B	0.0235508	0.000553078	-0.788758	down	-0.788758	0.000543681	6.1982e-06	-0.86821	down	-0.86821
RPL11	0.0235508	0.000551413	-1.27528	down	-1.27528	0.3117	0.15266	-0.749325	down	-0.749325
LINC03062	0.0237376	0.000560538	-1.38521	down	-1.38521
CPLX3	0.0237376	0.000559059	1.13913	up	1.13913
LMAN1L	0.0237376	0.000559059	1.13913	up	1.13913
MIR3646	0.0240196	0.000568751	-1.013	down	-1.013
HNF4A	0.0240196	0.000568751	-1.013	down	-1.013
LINC00963	0.0244236	0.000579896	1.0464	up	1.0464	0.00233405	5.53584e-05	1.10756	up	1.10756
LOC124900275	0.0244236	0.000579896	1.0464	up	1.0464	0.00233405	5.53584e-05	1.10756	up	1.10756
LOC102724482	0.0245669	0.000591245	1.5258	up	1.5258	0.0921101	0.0210914	-0.815327	down	-0.815327
LOC107983950	0.0245669	0.000589849	1.9253	up	1.9253	0.195089	0.0723844	-0.563213	down	-0.563213
GALNS	0.0245669	0.000589849	1.9253	up	1.9253	0.132533	0.0383949	1.03639	mixed	1.03639
DNTTIP2	0.0245669	0.00058519	-1.17066	down	-1.17066	0.284699	0.131469	0.842283	up	0.842283
APRT	0.0245669	0.000589849	1.9253	up	1.9253	0.132533	0.0383949	1.03639	mixed	1.03639
TRAPPC2L	0.0245669	0.000589849	1.9253	up	1.9253	0.195089	0.0723844	-0.563213	down	-0.563213
GDPD1	0.0253811	0.000612483	-1.36808	down	-1.36808	0.655771	0.481527	-0.242211	mixed	-0.242211
LOC101928438	0.0254281	0.000618553	-0.778569	down	-0.778569	0.452867	0.273738	-0.421511	down	-0.421511
IRAIN	0.0254281	0.000618211	1.31869	up	1.31869	0.280256	0.127947	-0.837098	down	-0.837098
LOC107987011	0.0254281	0.000618553	-0.778569	down	-0.778569	0.367359	0.198732	-0.407056	down	-0.407056
RPL35	0.0254281	0.000617416	-0.898162	down	-0.898162	0.0237238	0.0023002	-0.900221	down	-0.900221
LOC124902236	0.0254281	0.000618553	-0.778569	down	-0.778569	0.452867	0.273738	-0.421511	down	-0.421511
STX17-DT	0.0254281	0.000618553	-0.778569	down	-0.778569	0.367359	0.198732	-0.407056	down	-0.407056
ASCC2	0.0262755	0.000640865	-1.13137	down	-1.13137	0.0724465	0.0139093	-0.699596	down	-0.699596
LOC105370664	0.026395	0.000645489	-1.46027	down	-1.46027	0.201205	0.0757485	0.861128	up	0.861128
LOC124903383	0.026395	0.000645489	-1.46027	down	-1.46027	0.201205	0.0757485	0.861128	up	0.861128
WDR25	0.026395	0.000645489	-1.46027	down	-1.46027	0.201205	0.0757485	0.861128	up	0.861128
KCNIP1-OT1	0.0264091	0.000649249	1.50604	up	1.50604
ACTL10	0.0264091	0.000647639	-1.56322	down	-1.56322	0.202818	0.076763	0.845464	up	0.845464
KCNIP1	0.0264091	0.000649249	1.50604	up	1.50604
GPS1	0.0266264	0.000661483	-1.1249	down	-1.1249	0.129742	0.0370536	0.674751	up	0.674751
RFNG	0.0266264	0.000661483	-1.1249	down	-1.1249	0.129742	0.0370536	0.674751	up	0.674751
VPS16	0.0266264	0.000660758	-1.16579	down	-1.16579	0.740705	0.582819	0.379603	up	0.379603
PCED1A	0.0266264	0.000660758	-1.16579	down	-1.16579	0.740705	0.582819	0.379603	up	0.379603
ADRM1	0.0267881	0.000667859	1.95409	up	1.95409	0.399065	0.226338	0.647995	up	0.647995
NUDT1	0.0267881	0.000668965	-1.04506	down	-1.04506	0.530321	0.347261	-0.385434	down	-0.385434
CST13P	0.0268811	0.000673027	1.42986	up	1.42986
EXT2	0.0268906	0.000675006	-0.78907	down	-0.78907	0.0117763	0.000724672	-1.17401	down	-1.17401
LOC100287290	0.0277413	0.000709682	-1.06415	down	-1.06415	0.568967	0.386976	-0.384079	down	-0.384079
NCR3LG1	0.0277413	0.000710717	-1.21173	down	-1.21173	0.179076	0.0628006	-0.823149	down	-0.823149
EPCAM	0.0277413	0.000703172	-1.02972	down	-1.02972	0.083583	0.0178287	0.630276	up	0.630276
NUCB2	0.0277413	0.000710717	-1.21173	down	-1.21173	0.179076	0.0628006	-0.823149	down	-0.823149
BCAS4	0.0277413	0.000706953	-1.14299	down	-1.14299	0.596263	0.4174	0.550423	mixed	0.550423
MFSD1	0.0277413	0.000709682	-1.06415	down	-1.06415	0.568967	0.386976	-0.384079	down	-0.384079
MIR559	0.0277413	0.000703172	-1.02972	down	-1.02972	0.083583	0.0178287	0.630276	up	0.630276
ZNF140	0.0277413	0.00070866	1.80813	up	1.80813	0.00379217	0.000117914	1.27561	up	1.27561
LINGO1	0.0277413	0.000706711	-1.23878	down	-1.23878	0.594378	0.415387	0.409591	up	0.409591
MIDEAS	0.0277413	0.000710339	-1.42117	down	-1.42117	0.673426	0.502299	-0.553679	down	-0.553679
PNMA1	0.0277413	0.000710339	-1.42117	down	-1.42117	0.673426	0.502299	-0.553679	down	-0.553679
DDRGK1	0.0279322	0.000717416	-0.926254	down	-0.926254	0.167182	0.0562795	0.804643	up	0.804643
NR6A1	0.028047	0.000722178	0.999133	up	0.999133	0.00538863	0.000208798	1.43579	up	1.43579
POLR2C	0.0283108	0.000730802	-1.10038	down	-1.10038	0.844911	0.71482	0.124661	mixed	0.124661
COQ9	0.0283108	0.000730802	-1.10038	down	-1.10038	0.844911	0.71482	0.124661	mixed	0.124661
CAND1.11	0.0283355	0.000735804	1.71479	up	1.71479	0.278393	0.126066	-0.753459	mixed	-0.753459
MIR6875	0.0283355	0.000739393	1.484	up	1.484	0.0622698	0.0108704	0.90304	mixed	0.90304
ADM	0.0283355	0.000735804	1.71479	up	1.71479	0.278393	0.126066	-0.753459	mixed	-0.753459
LGALS9	0.0283355	0.000740605	-1.22658	down	-1.22658	0.102779	0.0251873	-0.786985	down	-0.786985
NF2	0.0283355	0.000740027	1.24036	up	1.24036	0.217232	0.0852963	-0.671605	mixed	-0.671605
SRRT	0.0283355	0.000739393	1.484	up	1.484	0.322862	0.161659	0.615093	mixed	0.615093
SLC12A9	0.0283355	0.000739393	1.484	up	1.484	0.0622698	0.0108704	0.90304	mixed	0.90304
TRIP6	0.0283355	0.000739393	1.484	up	1.484	0.0622698	0.0108704	0.90304	mixed	0.90304
KSR1	0.0283355	0.000740605	-1.22658	down	-1.22658	0.102779	0.0251873	-0.786985	down	-0.786985
MIR4667	0.0286164	0.000759128	1.1757	up	1.1757	0.0799958	0.0166334	-0.741466	down	-0.741466
VTI1B	0.0286164	0.000752607	-0.723587	down	-0.723587	0.0194731	0.0016943	0.663533	mixed	0.663533
FAM135A-AS1	0.0286164	0.000757735	-1.29002	down	-1.29002	0.473377	0.293109	-0.571486	down	-0.571486
CPT2	0.0286164	0.000758795	-0.76593	down	-0.76593	0.395808	0.223671	0.660654	up	0.660654
MACROD2	0.0286164	0.000753624	-1.47384	down	-1.47384	0.0162868	0.00125754	-0.920931	down	-0.920931
MACROD2-IT1	0.0286164	0.000753624	-1.47384	down	-1.47384	0.0162868	0.00125754	-0.920931	down	-0.920931
RDH11	0.0286164	0.000752607	-0.723587	down	-0.723587	0.0194731	0.0016943	0.663533	mixed	0.663533
FAM135A	0.0286164	0.000757735	-1.29002	down	-1.29002	0.473377	0.293109	-0.571486	down	-0.571486
TESK1	0.0286164	0.000759128	1.1757	up	1.1757	0.0799958	0.0166334	-0.741466	down	-0.741466
ZNF469	0.0286164	0.000760906	1.17617	up	1.17617	0.657205	0.483234	0.25142	up	0.25142
XPO6	0.0287262	0.000765685	1.38658	up	1.38658	0.00480545	0.000176493	1.39791	up	1.39791
C5	0.02888	0.000772415	-1.27368	down	-1.27368	0.205908	0.0783458	-0.744531	down	-0.744531
CCDC77	0.02888	0.000773522	-0.974858	down	-0.974858	0.151187	0.0478261	-0.839136	down	-0.839136
LOC102724389	0.0291205	0.000785614	-1.16201	down	-1.16201	0.546791	0.36343	0.34932	mixed	0.34932
LOC107985892	0.0291205	0.000785614	-1.16201	down	-1.16201	0.546791	0.36343	0.34932	mixed	0.34932
DNAAF10	0.0291205	0.000785614	-1.16201	down	-1.16201	0.546791	0.36343	0.34932	mixed	0.34932
PPP3R1	0.0291205	0.000785614	-1.16201	down	-1.16201	0.546791	0.36343	0.34932	mixed	0.34932
MIR7114	0.0291945	0.000789499	1.2912	up	1.2912	0.62974	0.452746	0.397279	mixed	0.397279
NSMF	0.0291945	0.000789499	1.2912	up	1.2912	0.62974	0.452746	0.397279	mixed	0.397279
PNPLA7	0.0291945	0.000789499	1.2912	up	1.2912	0.62974	0.452746	0.397279	mixed	0.397279
MIR3646	0.0293739	0.000796252	-1.013	down	-1.013
HNF4A	0.0293739	0.000796252	-1.013	down	-1.013
TCN2	0.0295109	0.000801876	-1.24587	down	-1.24587
TRIM59-IFT80	0.0299216	0.000822127	-1.4065	down	-1.4065	0.000668788	8.57754e-06	-1.53458	down	-1.53458
RARA-AS1	0.0299216	0.000822714	1.15463	up	1.15463
ZNF638	0.0299216	0.000817554	-1.11418	down	-1.11418	0.529038	0.345713	0.469498	mixed	0.469498
TRIM59	0.0299216	0.000822127	-1.4065	down	-1.4065	0.00157048	2.99487e-05	-0.918278	down	-0.918278
SNRPB	0.0299216	0.000821413	-0.69449	down	-0.69449	0.186069	0.066615	-0.715973	down	-0.715973
ZNF343	0.0299216	0.000821413	-0.69449	down	-0.69449	0.186069	0.066615	-0.715973	down	-0.715973
RAB36	0.0299216	0.000819218	1.58118	up	1.58118
SOX12	0.0302079	0.00083254	1.21734	up	1.21734	0.510775	0.328473	-0.589756	down	-0.589756
CCDC14	0.0302348	0.000835238	-0.860142	down	-0.860142	0.00407458	0.000133814	-0.672598	down	-0.672598
CACTIN	0.0304029	0.000841848	1.52557	up	1.52557	0.292599	0.137129	0.525421	mixed	0.525421
NRARP	0.0305939	0.000849117	1.11573	up	1.11573	0.59504	0.416119	0.631562	up	0.631562
ARL8A	0.0307455	0.000859906	-1.41279	down	-1.41279	0.0799677	0.016586	-0.83921	down	-0.83921
CHAMP1	0.0307455	0.000860549	-1.06638	down	-1.06638	0.247954	0.104681	-0.667568	down	-0.667568
GPR132	0.0307455	0.000861207	1.69356	up	1.69356
PTPN7	0.0307455	0.000859906	-1.41279	down	-1.41279	0.0799677	0.016586	-0.83921	down	-0.83921
TGFB1I1	0.0307455	0.00086128	1.19875	up	1.19875	0.029555	0.00331005	-0.983136	down	-0.983136
GABARAP	0.0311056	0.000873939	1.61334	up	1.61334	0.00126452	2.15422e-05	1.31578	up	1.31578
CLDN7	0.0311056	0.000873939	1.61334	up	1.61334	0.00126452	2.15422e-05	1.31578	up	1.31578
ZNF746	0.0311056	0.000875393	-1.40162	down	-1.40162	0.991564	0.968212	-0.0100258	mixed	-0.0100258
CTDNEP1	0.0311056	0.000873939	1.61334	up	1.61334	0.00126452	2.15422e-05	1.31578	up	1.31578
PLB1	0.0311881	0.000881981	1.7539	up	1.7539	0.19226	0.0703261	-0.669942	down	-0.669942
NRAS	0.0311881	0.000883408	1.03225	up	1.03225	0.0293776	0.00327612	1.03885	up	1.03885
SPAG4	0.0311881	0.000883767	1.11933	up	1.11933	0.81653	0.676157	0.498108	up	0.498108
CSDE1	0.0311881	0.000883408	1.03225	up	1.03225	0.0293776	0.00327612	1.03885	up	1.03885
CENPB	0.0312651	0.000887971	-1.32166	down	-1.32166	0.354403	0.187693	-0.655472	down	-0.655472
SPEF1	0.0312651	0.000887971	-1.32166	down	-1.32166	0.354403	0.187693	-0.655472	down	-0.655472
PET117	0.0317496	0.00090584	0.960688	up	0.960688	0.0764673	0.0152557	1.22737	up	1.22737
KAT14	0.0317496	0.00090584	0.960688	up	0.960688	0.0764673	0.0152557	1.22737	up	1.22737
APLP2	0.0318819	0.000911678	1.33717	up	1.33717	0.55013	0.366682	0.7166	up	0.7166
SLC34A3	0.0320708	0.000919812	1.37091	up	1.37091	0.0531248	0.00840002	1.13494	up	1.13494
NIPSNAP3B	0.0320708	0.00092123	-1.11134	down	-1.11134	0.926657	0.835169	0.31594	mixed	0.31594
RNF224	0.0320708	0.000919812	1.37091	up	1.37091	0.0531248	0.00840002	1.13494	up	1.13494
CARF	0.0321735	0.000926259	1.3862	up	1.3862	0.324912	0.163311	-0.538228	mixed	-0.538228
LOC100130587	0.0328008	0.000950687	-1.2233	down	-1.2233
HOXA10-HOXA9	0.0328008	0.000949484	1.2794	up	1.2794	0.169025	0.0573162	0.864468	up	0.864468
CHRNA4	0.0328008	0.000950687	-1.2233	down	-1.2233
HOXA9	0.0328008	0.000949484	1.2794	up	1.2794	0.169025	0.0573162	0.864468	up	0.864468
HOXA10	0.0328008	0.000949484	1.2794	up	1.2794	0.169025	0.0573162	0.864468	up	0.864468
MIR196B	0.0328008	0.000949484	1.2794	up	1.2794	0.169025	0.0573162	0.864468	up	0.864468
EEF1A1	0.0330406	0.000959774	1.74965	up	1.74965	0.738657	0.580384	-0.377612	down	-0.377612
LOC105371729	0.0340989	0.00100155	-1.12257	down	-1.12257	0.879803	0.764798	-0.224253	mixed	-0.224253
ARHGEF2-AS1	0.0340989	0.00100155	-1.12257	down	-1.12257	0.879803	0.764798	-0.224253	mixed	-0.224253
POU2AF3	0.0340989	0.000998585	-1.4008	down	-1.4008	0.0221987	0.00208878	-0.801128	down	-0.801128
SIRPA	0.0340989	0.00100111	-1.51752	down	-1.51752	0.573922	0.39312	0.492366	up	0.492366
COLCA1	0.0340989	0.000998585	-1.4008	down	-1.4008	0.0221987	0.00208878	-0.801128	down	-0.801128
SSR2	0.0340989	0.00100155	-1.12257	down	-1.12257	0.879803	0.764798	-0.224253	mixed	-0.224253
HBEGF	0.0341988	0.00100669	-1.25289	down	-1.25289	0.505676	0.323622	-0.69194	down	-0.69194
EDAR	0.0346067	0.00102094	1.81921	up	1.81921	0.404557	0.230633	-0.656704	down	-0.656704
ARVCF	0.0347927	0.00102868	1.55419	up	1.55419	0.0353159	0.00433956	1.06686	up	1.06686
CDC42EP3	0.0348833	0.00103361	1.91959	up	1.91959	0.104216	0.0257805	1.17611	up	1.17611
FAM111B	0.0350471	0.00104073	-1.02712	down	-1.02712
PCAT29	0.0352822	0.00105049	-1.29321	down	-1.29321	0.664054	0.491496	-0.312122	down	-0.312122
MIR200CHG	0.0352822	0.00106063	1.41671	up	1.41671	0.00407458	0.000133452	1.46082	up	1.46082
LOC105377473	0.0352822	0.00105541	-1.00217	down	-1.00217
DRAIC	0.0352822	0.00105049	-1.29321	down	-1.29321	0.664054	0.491496	-0.312122	down	-0.312122
C9orf163	0.0352822	0.00106369	1.52904	up	1.52904	0.0229546	0.0021806	0.942345	up	0.942345
MIR141	0.0352822	0.00106063	1.41671	up	1.41671	0.00407458	0.000133452	1.46082	up	1.46082
MIR200C	0.0352822	0.00106063	1.41671	up	1.41671	0.00407458	0.000133452	1.46082	up	1.46082
INPP5E	0.0352822	0.00106369	1.52904	up	1.52904	0.0229546	0.0021806	0.942345	up	0.942345
PTPN6	0.0352822	0.00106063	1.41671	up	1.41671	0.00407458	0.000133452	1.46082	up	1.46082
TTC29	0.0352822	0.00105541	-1.00217	down	-1.00217
PLAA	0.0352822	0.00106081	-1.42455	down	-1.42455	0.365493	0.196904	-0.635269	down	-0.635269
SEC16A	0.0352822	0.00106369	1.52904	up	1.52904	0.0229546	0.0021806	0.942345	up	0.942345
UBE4B	0.0354376	0.00107067	-1.10367	down	-1.10367	0.484261	0.303872	-0.510992	mixed	-0.510992
LINC02106	0.0354493	0.00111689	-1.18932	down	-1.18932
SH3BP5-AS1	0.0354493	0.00111519	-0.9752	down	-0.9752	0.745352	0.589034	-0.451997	down	-0.451997
LOC101928953	0.0354493	0.00107643	1.57415	up	1.57415	0.759485	0.6061	0.364019	up	0.364019
LOC102724497	0.0354493	0.00108395	1.5258	up	1.5258	0.0289924	0.00321136	0.979211	up	0.979211
DEPP1	0.0354493	0.00111305	1.64249	up	1.64249	0.568967	0.386914	0.304946	up	0.304946
TOPBP1	0.0354493	0.00109727	-0.851232	down	-0.851232	0.0052266	0.000197814	-0.721724	down	-0.721724
LOC124901181	0.0354493	0.00111689	-1.18932	down	-1.18932
LOC124902884	0.0354493	0.00109452	1.09998	up	1.09998	0.982217	0.945315	0.0202892	mixed	0.0202892
LOC124909437	0.0354493	0.00109727	-0.851232	down	-0.851232	0.0052266	0.000197814	-0.721724	down	-0.721724
CAPN7	0.0354493	0.00111519	-0.9752	down	-0.9752	0.745352	0.589034	-0.451997	down	-0.451997
KLHL35	0.0354493	0.00110305	-1.14043	down	-1.14043	0.0920664	0.0210686	-0.848795	down	-0.848795
COL6A4P1	0.0354493	0.00111519	-0.9752	down	-0.9752	0.745352	0.589034	-0.451997	down	-0.451997
NIPAL3	0.0354493	0.00108762	-1.30221	down	-1.30221	0.00673875	0.000297259	-1.38441	down	-1.38441
MRS2	0.0354493	0.00110614	-0.870348	down	-0.870348	0.0133146	0.000874529	-0.661321	down	-0.661321
KIAA1614	0.0354493	0.00107874	-1.21312	down	-1.21312	0.120974	0.0328411	-0.723182	down	-0.723182
SRPRB	0.0354493	0.00109727	-0.851232	down	-0.851232	0.00239875	5.84227e-05	-0.694283	down	-0.694283
ZNF106	0.0354493	0.00108867	1.72378	up	1.72378	0.642358	0.467173	0.325213	up	0.325213
SLC1A5	0.0354493	0.00111578	1.52316	up	1.52316	0.000826235	1.16673e-05	2.0188	up	2.0188
TF	0.0354493	0.00109727	-0.851232	down	-0.851232	0.00239875	5.84227e-05	-0.694283	down	-0.694283
ZNF16	0.0354493	0.0011164	1.24722	up	1.24722	0.120107	0.0324632	-0.675257	down	-0.675257
CA4	0.0354493	0.00111377	-1.27901	down	-1.27901
PCNX2	0.0354493	0.00111069	-1.35786	down	-1.35786	0.119143	0.032078	-0.997059	down	-0.997059
GDPD5	0.0354493	0.00110305	-1.14043	down	-1.14043	0.0920664	0.0210686	-0.848795	down	-0.848795
RBM4B	0.0354493	0.00108485	-1.05165	down	-1.05165	0.804969	0.662464	0.367766	mixed	0.367766
STPG1	0.0354493	0.00108762	-1.30221	down	-1.30221	0.00673875	0.000297259	-1.38441	down	-1.38441
LOC124909464	0.0356999	0.0011271	-1.17279	down	-1.17279	0.000765558	1.03641e-05	-0.740207	down	-0.740207
NDUFB5	0.0356999	0.0011271	-1.17279	down	-1.17279	0.000393245	3.94824e-06	-0.740207	down	-0.740207
USP13	0.0356999	0.0011271	-1.17279	down	-1.17279	0.000393245	3.94824e-06	-0.740207	down	-0.740207
LNPK	0.0357474	0.00113091	-0.839498	down	-0.839498	0.137264	0.0410608	-0.856372	down	-0.856372
WHAMMP4	0.0359271	0.00117129	-0.639654	down	-0.639654	0.169566	0.0576095	-0.34014	down	-0.34014
ZNF605	0.0359271	0.00116851	1.70566	up	1.70566	0.0528876	0.00831292	1.26472	up	1.26472
MIR4779	0.0359271	0.0011612	-0.881155	down	-0.881155	0.211588	0.0819463	-0.615727	down	-0.615727
MIR4714	0.0359271	0.00114235	1.31869	up	1.31869	0.161799	0.053409	-1.20463	down	-1.20463
GOLGA8R	0.0359271	0.00117129	-0.639654	down	-0.639654	0.169566	0.0576095	-0.34014	down	-0.34014
LOC105376704	0.0359271	0.00117129	-0.639654	down	-0.639654	0.169566	0.0576095	-0.34014	down	-0.34014
IMMT	0.0359271	0.0011612	-0.881155	down	-0.881155	0.211588	0.0819463	-0.615727	down	-0.615727
LOC124903452	0.0359271	0.00117129	-0.639654	down	-0.639654	0.169566	0.0576095	-0.34014	down	-0.34014
LOC124905170	0.0359271	0.00117031	1.58118	up	1.58118	0.377725	0.207482	-0.432659	down	-0.432659
CRIP1	0.0359271	0.00116357	1.21058	up	1.21058	0.0755424	0.0149392	-0.638315	down	-0.638315
E2F1	0.0359271	0.00116194	-1.56322	down	-1.56322	0.164013	0.0546711	-0.705102	down	-0.705102
SNORD82	0.0359271	0.00116671	-1.29918	down	-1.29918	0.00195412	4.13912e-05	-0.998569	down	-0.998569
RSPH14	0.0359271	0.00117031	1.58118	up	1.58118	0.377725	0.207482	-0.432659	down	-0.432659
GOLGA3	0.0359271	0.00116851	1.70566	up	1.70566	0.0528876	0.00831292	1.26472	up	1.26472
TEDC1	0.0359271	0.00116357	1.21058	up	1.21058	0.0755424	0.0149392	-0.638315	down	-0.638315
SMG7-AS1	0.0359271	0.00116072	1.62411	up	1.62411	0.132257	0.0382345	0.980896	mixed	0.980896
IGF1R	0.0359271	0.00114235	1.31869	up	1.31869	0.161799	0.053409	-1.20463	down	-1.20463
MAP2	0.0359271	0.00117146	-1.33666	down	-1.33666	0.0328875	0.00391335	-1.09314	down	-1.09314
NCL	0.0359271	0.00116671	-1.29918	down	-1.29918	0.00195412	4.13912e-05	-0.998569	down	-0.998569
CYCS	0.0359271	0.00114374	-0.841415	down	-0.841415	0.279612	0.127418	-0.508971	mixed	-0.508971
CHFR	0.0359271	0.00116851	1.70566	up	1.70566	0.0528876	0.00831292	1.26472	up	1.26472
SNORD20	0.0359271	0.00116671	-1.29918	down	-1.29918	0.00195412	4.13912e-05	-0.998569	down	-0.998569
NECAB3	0.0359271	0.00116194	-1.56322	down	-1.56322	0.164013	0.0546711	-0.705102	down	-0.705102
SNORA75	0.0359271	0.00116671	-1.29918	down	-1.29918	0.00195412	4.13912e-05	-0.998569	down	-0.998569
TMEM117	0.0359271	0.00115502	-0.932107	down	-0.932107	0.228544	0.0923649	1.0106	up	1.0106
SMG7	0.0359271	0.00116072	1.62411	up	1.62411	0.132257	0.0382345	0.980896	mixed	0.980896
ZNF567-DT	0.0362264	0.00118591	1.4025	up	1.4025
ZNF567	0.0362264	0.00118591	1.4025	up	1.4025
KIF7	0.0362561	0.00118922	-1.27939	down	-1.27939	0.975656	0.925649	0.0260381	mixed	0.0260381
PLIN1	0.0362561	0.00118922	-1.27939	down	-1.27939	0.217963	0.0858837	0.793268	up	0.793268
CHCHD6	0.0364522	0.00119801	-1.14637	down	-1.14637	0.00124881	2.07555e-05	-1.68921	down	-1.68921
SPTLC2	0.0364905	0.00120163	-0.715655	down	-0.715655	4.27157e-08	1.93684e-11	-1.79092	down	-1.79092
FARSB	0.0365389	0.00120695	-0.787012	down	-0.787012	0.000243247	1.71744e-06	-1.10437	down	-1.10437
MBP	0.0365389	0.00120796	1.74392	up	1.74392	0.973648	0.921982	-0.0667295	mixed	-0.0667295
RN7SL3	0.0367944	0.00121878	-0.776119	down	-0.776119	0.942399	0.86175	-0.0300676	mixed	-0.0300676
NEMF	0.0367944	0.00121878	-0.776119	down	-0.776119	0.942399	0.86175	-0.0300676	mixed	-0.0300676
ATP8B1-AS1	0.0368841	0.00122937	1.31861	up	1.31861	0.657997	0.484316	0.419426	up	0.419426
MIR4633	0.0368841	0.0012313	-0.856233	down	-0.856233	0.0290034	0.00321446	-0.863985	down	-0.863985
LOC105372141	0.0368841	0.00122937	1.31861	up	1.31861	0.657997	0.484316	0.419426	up	0.419426
DNAAF10	0.0368841	0.00122878	-1.16201	down	-1.16201	0.546791	0.36343	0.34932	mixed	0.34932
TTLL6	0.0368841	0.0012305	-1.11395	down	-1.11395	0.264602	0.116241	-0.529104	down	-0.529104
ISOC1	0.0368841	0.0012313	-0.856233	down	-0.856233	0.0290034	0.00321446	-0.863985	down	-0.863985
PPP3R1	0.0368841	0.00122878	-1.16201	down	-1.16201	0.546791	0.36343	0.34932	mixed	0.34932
ZCCHC17	0.0369921	0.00123969	-0.91411	down	-0.91411	0.168506	0.0570144	-0.806351	down	-0.806351
SNRNP40	0.0369921	0.00123969	-0.91411	down	-0.91411	0.168506	0.0570144	-0.806351	down	-0.806351
MIR4655	0.0371817	0.00127422	-1.04506	down	-1.04506	0.0871773	0.0191148	-0.714684	down	-0.714684
CEBPB-AS1	0.0371817	0.00127491	1.00253	up	1.00253	0.000555837	6.55282e-06	2.00894	up	2.00894
MIR6779	0.0371817	0.00126818	1.92632	up	1.92632	0.0856609	0.0185281	0.976511	up	0.976511
MIR200CHG	0.0371817	0.00126686	1.41671	up	1.41671	0.00407458	0.000133452	1.46082	up	1.46082
CNGA4	0.0371817	0.0012524	-0.8253	down	-0.8253	0.000475555	5.1135e-06	-1.60134	down	-1.60134
MRM2	0.0371817	0.00127422	-1.04506	down	-1.04506	0.0871773	0.0191148	-0.714684	down	-0.714684
HSF4	0.0371817	0.00125701	1.52111	up	1.52111	0.642866	0.467721	0.817642	up	0.817642
LASP1	0.0371817	0.00126818	1.92632	up	1.92632	0.0856609	0.0185281	0.976511	up	0.976511
EEF1AKMT2	0.0371817	0.00126095	-1.54454	down	-1.54454	0.180068	0.0634369	-0.941766	down	-0.941766
MIR141	0.0371817	0.00126686	1.41671	up	1.41671	0.00407458	0.000133452	1.46082	up	1.46082
MIR200C	0.0371817	0.00126686	1.41671	up	1.41671	0.00407458	0.000133452	1.46082	up	1.46082
MRPL2	0.0371817	0.00127137	1.44209	up	1.44209	0.00172029	3.39413e-05	1.55009	up	1.55009
PTK7	0.0371817	0.00127137	1.44209	up	1.44209	0.00257506	6.5886e-05	1.55009	up	1.55009
PTPN6	0.0371817	0.00126686	1.41671	up	1.41671	0.00407458	0.000133452	1.46082	up	1.46082
MCTP1	0.0371817	0.00126558	-1.31248	down	-1.31248
MAD1L1	0.0371817	0.00127422	-1.04506	down	-1.04506	0.0871773	0.0191148	-0.714684	down	-0.714684
FHIP1B	0.0371817	0.0012524	-0.8253	down	-0.8253	0.000475555	5.1135e-06	-1.60134	down	-1.60134
KLC4	0.0371817	0.00127137	1.44209	up	1.44209	0.00257506	6.5886e-05	1.55009	up	1.55009
NOL3	0.0371817	0.00125701	1.52111	up	1.52111	0.926657	0.834485	-0.178365	down	-0.178365
FAM53B	0.0371817	0.00126095	-1.54454	down	-1.54454	0.180068	0.0634369	-0.941766	down	-0.941766
CUL7	0.0371817	0.00127137	1.44209	up	1.44209	0.00172029	3.39413e-05	1.55009	up	1.55009
MIR6716	0.0373124	0.00128422	1.87939	up	1.87939	0.163449	0.0542606	0.857266	up	0.857266
FSTL3	0.0373124	0.00128259	1.48453	up	1.48453	0.303239	0.145943	0.872774	up	0.872774
PHLDB1	0.0373124	0.00128422	1.87939	up	1.87939	0.163449	0.0542606	0.857266	up	0.857266
LINC00677	0.0375295	0.00129562	1.3453	up	1.3453	0.542771	0.359562	-0.748356	down	-0.748356
IFT74	0.0375295	0.00129655	-1.42455	down	-1.42455	0.368608	0.1998	-0.635269	mixed	-0.635269
MIR147B	0.0375632	0.00131022	-1.2176	down	-1.2176
MROH7-TTC4	0.0375632	0.0013306	-0.952255	down	-0.952255	0.000773205	1.05678e-05	-0.894262	down	-0.894262
SERF2-C15ORF63	0.0375632	0.00132341	-1.19396	down	-1.19396	0.0371863	0.00469224	1.15949	up	1.15949
SERF2	0.0375632	0.00132341	-1.19396	down	-1.19396	0.0371863	0.00469224	1.15949	up	1.15949
LINC02202	0.0375632	0.00133275	-1.18953	down	-1.18953
SLC30A4-AS1	0.0375632	0.00131022	-1.2176	down	-1.2176	0.067525	0.0124174	-0.934545	down	-0.934545
LOC107986467	0.0375632	0.00133275	-1.18953	down	-1.18953
LYPLA2	0.0375632	0.00133651	-1.28995	down	-1.28995	0.458117	0.279007	-0.357228	down	-0.357228
CTSD	0.0375632	0.00133039	1.76982	up	1.76982	0.871756	0.753301	0.23857	up	0.23857
EBF1	0.0375632	0.00133275	-1.18953	down	-1.18953
TMEM9	0.0375632	0.00133559	1.73214	up	1.73214	0.00735069	0.000337109	1.15654	up	1.15654
HYPK	0.0375632	0.00132341	-1.19396	down	-1.19396	0.0371863	0.00469224	1.15949	up	1.15949
ACOT11	0.0375632	0.0013306	-0.952255	down	-0.952255	0.000773205	1.05678e-05	-0.894262	down	-0.894262
MROH7	0.0375632	0.0013306	-0.952255	down	-0.952255	0.000773205	1.05678e-05	-0.894262	down	-0.894262
LINC01376	0.0375632	0.00130506	-1.4822	down	-1.4822	0.191472	0.0697773	-0.540865	down	-0.540865
IFITM10	0.0375632	0.00133039	1.76982	up	1.76982	0.871756	0.753301	0.23857	up	0.23857
FCF1	0.0375632	0.00132162	-1.00644	down	-1.00644	0.201778	0.0761603	-0.690828	down	-0.690828
PITHD1	0.0375632	0.00133651	-1.28995	down	-1.28995	0.458117	0.279007	-0.357228	down	-0.357228
ABCD3	0.0375632	0.00132445	-0.900552	down	-0.900552	0.482292	0.301409	-0.398753	down	-0.398753
TGM2	0.0375632	0.0013366	-1.41958	down	-1.41958
TTC4	0.0375632	0.0013306	-0.952255	down	-0.952255	0.849083	0.720714	-0.403681	down	-0.403681
C15orf48	0.0375632	0.00131022	-1.2176	down	-1.2176
AP3D1	0.0375632	0.00132508	1.36095	up	1.36095	0.000622785	7.70178e-06	1.05132	up	1.05132
AREL1	0.0375632	0.00132162	-1.00644	down	-1.00644	0.201778	0.0761603	-0.690828	down	-0.690828
SMARCAD1-DT	0.038096	0.00138266	1.56049	up	1.56049	0.993185	0.973516	-0.00972379	mixed	-0.00972379
MIR6847	0.038096	0.00138143	-0.863626	down	-0.863626	0.294546	0.138764	-0.543029	down	-0.543029
MIR6875	0.038096	0.00136204	1.484	up	1.484	0.0622698	0.0108704	0.90304	mixed	0.90304
PAUPAR	0.038096	0.00137987	1.3299	up	1.3299	0.469301	0.289065	-0.364891	down	-0.364891
LOC105373311	0.038096	0.00137851	1.50848	up	1.50848	0.442327	0.264418	-0.639115	down	-0.639115
LOC124902657	0.038096	0.00137987	1.3299	up	1.3299	0.469301	0.289065	-0.364891	down	-0.364891
LOC124902847	0.038096	0.00137987	1.3299	up	1.3299	0.766442	0.615409	0.242463	mixed	0.242463
CYC1	0.038096	0.00138143	-0.863626	down	-0.863626	0.3682	0.19946	-0.566706	down	-0.566706
EWSR1	0.038096	0.00136766	0.909357	up	0.909357	0.220648	0.0874419	0.762272	up	0.762272
ACSL4	0.038096	0.00137851	1.50848	up	1.50848	0.442327	0.264418	-0.639115	down	-0.639115
RHBDD3	0.038096	0.00136766	0.909357	up	0.909357	0.220648	0.0874419	0.762272	up	0.762272
PAX6-AS1	0.038096	0.00137987	1.3299	up	1.3299	0.469301	0.289065	-0.364891	down	-0.364891
CYB5R1	0.038096	0.00135911	1.54751	up	1.54751
EXOSC4	0.038096	0.00138143	-0.863626	down	-0.863626	0.294546	0.138764	-0.543029	down	-0.543029
ATF7IP	0.038096	0.00136815	1.09998	up	1.09998	0.982217	0.945315	0.0202892	mixed	0.0202892
SMARCAD1	0.038096	0.00138266	1.56049	up	1.56049	0.993185	0.973516	-0.00972379	mixed	-0.00972379
SLC12A9	0.038096	0.00136204	1.484	up	1.484	0.0622698	0.0108704	0.90304	mixed	0.90304
RCN1	0.038096	0.00137987	1.3299	up	1.3299	0.469301	0.289065	-0.364891	down	-0.364891
TRIP6	0.038096	0.00136204	1.484	up	1.484	0.0622698	0.0108704	0.90304	mixed	0.90304
GPAA1	0.038096	0.00138143	-0.863626	down	-0.863626	0.294546	0.138764	-0.543029	down	-0.543029
ARK2N	0.0382361	0.00139392	-1.06476	down	-1.06476	0.162429	0.0536906	-0.958329	down	-0.958329
MAFG	0.0382361	0.00139172	-1.34513	down	-1.34513	0.0490618	0.00736976	1.03963	up	1.03963
SIRT7	0.0382361	0.00139172	-1.34513	down	-1.34513	0.0490618	0.00736976	1.03963	up	1.03963
EI24	0.0382361	0.00139517	-0.74401	down	-0.74401	0.665904	0.493621	-0.385275	down	-0.385275
CLK4	0.0383246	0.00140088	1.72502	up	1.72502	0.541788	0.358349	-0.370842	down	-0.370842
IFT122	0.0384446	0.00140775	1.67821	up	1.67821	0.000266352	1.96685e-06	-0.970464	down	-0.970464
SNORD58C	0.0384946	0.00141457	-0.951873	down	-0.951873	0.104133	0.0257263	-0.784178	down	-0.784178
MIR1539	0.0384946	0.00141457	-0.951873	down	-0.951873	0.104133	0.0257263	-0.784178	down	-0.784178
RPL17-C18orf32	0.0384946	0.00141457	-0.951873	down	-0.951873	0.104133	0.0257263	-0.784178	down	-0.784178
C18orf32	0.0384946	0.00141457	-0.951873	down	-0.951873	0.104133	0.0257263	-0.784178	down	-0.784178
RPL17	0.0384946	0.00141457	-0.951873	down	-0.951873	0.104133	0.0257263	-0.784178	down	-0.784178
MAP6	0.0386539	0.00142292	-1.0846	down	-1.0846
CRIP2	0.0388016	0.001433	0.903516	up	0.903516	0.373015	0.203752	0.601924	up	0.601924
TAF11L4	0.0388016	0.00143338	-1.27273	down	-1.27273
TAF11L5	0.0388016	0.00143338	-1.27273	down	-1.27273
TAF11L3	0.0388016	0.00143338	-1.27273	down	-1.27273
MTA1	0.0388016	0.001433	0.903516	up	0.903516	0.373015	0.203752	0.601924	up	0.601924
NUDC	0.0393368	0.00145569	-0.802124	down	-0.802124	0.038081	0.00492355	-0.782139	down	-0.782139
MYADML2	0.0394278	0.00146161	1.03138	up	1.03138	0.457216	0.277915	0.457644	up	0.457644
PYCR1	0.0394278	0.00146161	1.03138	up	1.03138	0.457216	0.277915	0.457644	up	0.457644
YLPM1	0.0394284	0.00146418	-1.03684	down	-1.03684	0.0558399	0.00914027	-0.635302	down	-0.635302
SBF2	0.0395594	0.00147161	1.71479	up	1.71479	0.156919	0.0506793	-0.861564	down	-0.861564
ZC3H4	0.0396456	0.00147994	1.53282	up	1.53282	0.156468	0.0503407	0.777425	up	0.777425
FBRS	0.0396456	0.00147902	1.25603	up	1.25603	0.0112002	0.000659662	1.18466	up	1.18466
PRR14	0.0396456	0.00147902	1.25603	up	1.25603	0.0112002	0.000659662	1.18466	up	1.18466
PHF19	0.0399015	0.00149208	-0.725892	down	-0.725892	0.413904	0.239541	-0.681247	mixed	-0.681247
SPINK4	0.0403127	0.00151006	-0.912481	down	-0.912481
MIR4520-1	0.0404645	0.00152188	1.46064	up	1.46064	0.0838661	0.0179162	-0.663628	down	-0.663628
MIR4520-2	0.0404645	0.00152188	1.46064	up	1.46064	0.0838661	0.0179162	-0.663628	down	-0.663628
IRS1	0.0404645	0.00152636	0.926544	up	0.926544	0.633055	0.456482	-0.538752	down	-0.538752
C17orf100	0.0404645	0.00152188	1.46064	up	1.46064	0.0838661	0.0179162	-0.663628	down	-0.663628
MED31	0.0404645	0.00152188	1.46064	up	1.46064	0.0838661	0.0179162	-0.663628	down	-0.663628
TRPS1	0.0404645	0.00152673	-1.06131	down	-1.06131	0.0472428	0.0068638	-1.05072	down	-1.05072
ARPC5L	0.0404645	0.00152884	-0.898162	down	-0.898162	0.041102	0.00549493	-0.900221	down	-0.900221
KIAA0753	0.0404645	0.00152188	1.46064	up	1.46064	0.0838661	0.0179162	-0.663628	down	-0.663628
SATB1	0.040713	0.00154086	-1.04284	down	-1.04284	0.000147595	9.08248e-07	-1.45931	down	-1.45931
TBC1D5	0.040713	0.00154086	-1.04284	down	-1.04284	0.000147595	9.08248e-07	-1.45931	down	-1.45931
KMT5B	0.040876	0.00154968	1.08578	up	1.08578	0.0256801	0.0026066	0.723918	up	0.723918
SRSF10	0.0410761	0.00155992	-0.933796	down	-0.933796	0.0401517	0.00532391	-1.03372	down	-1.03372
MFSD3	0.0414997	0.00157869	0.871886	up	0.871886	0.697142	0.52897	0.226453	up	0.226453
GPT	0.0414997	0.00157869	0.871886	up	0.871886	0.697142	0.52897	0.226453	up	0.226453
TRPM6	0.0417372	0.00159043	-1.24218	down	-1.24218	0.822482	0.68375	-0.346279	down	-0.346279
NRSN2-AS1	0.0418294	0.00159935	1.21734	up	1.21734	0.875929	0.759104	0.148357	mixed	0.148357
BANF2	0.0418294	0.00159928	-1.24498	down	-1.24498
CDS2	0.0421089	0.00161276	0.938768	up	0.938768	0.0543299	0.00871362	-0.722991	down	-0.722991
KRT18	0.0423714	0.00162556	1.36966	up	1.36966	0.0447365	0.00626218	0.988098	up	0.988098
CEP295NL	0.0424915	0.00163292	1.93055	up	1.93055	0.322784	0.161498	-0.484125	down	-0.484125
TIMP2	0.0424915	0.00163292	1.93055	up	1.93055	0.322784	0.161498	-0.484125	down	-0.484125
LINC01127	0.0426319	0.00165111	1.39825	up	1.39825
SAE1	0.0426319	0.00164908	1.53282	up	1.53282	0.160096	0.052629	0.777425	up	0.777425
C5orf34-AS1	0.0426319	0.00164872	-0.775414	down	-0.775414	0.483909	0.303375	-0.415952	mixed	-0.415952
VPS26B	0.0426319	0.00165486	-1.10644	down	-1.10644	0.132605	0.038605	-0.785858	down	-0.785858
LOC124900190	0.0426319	0.00164872	-0.775414	down	-0.775414	0.483909	0.303375	-0.415952	mixed	-0.415952
NCAPD3	0.0426319	0.00165486	-1.10644	down	-1.10644	0.132605	0.038605	-0.785858	down	-0.785858
C5orf34	0.0426319	0.00164872	-0.775414	down	-0.775414	0.483909	0.303375	-0.415952	mixed	-0.415952
TMEM267	0.0426319	0.00164872	-0.775414	down	-0.775414	0.483909	0.303375	-0.415952	mixed	-0.415952
SNORD121A	0.0426718	0.0017139	1.66451	up	1.66451	0.0888284	0.0196495	-0.856347	down	-0.856347
LINC00941	0.0426718	0.00171473	1.19619	up	1.19619	0.38167	0.210786	0.625573	up	0.625573
MRPS30-DT	0.0426718	0.0016842	-0.966378	down	-0.966378	0.0119681	0.000743455	-0.964785	down	-0.964785
BMPR1B-DT	0.0426718	0.00172266	1.20724	up	1.20724	0.0438388	0.00609961	1.30504	up	1.30504
SNORD121B	0.0426718	0.0017139	1.66451	up	1.66451	0.0888284	0.0196495	-0.856347	down	-0.856347
WDR35-DT	0.0426718	0.0016915	-1.23873	down	-1.23873	0.976947	0.931584	-0.0286033	down	-0.0286033
SLC30A4-AS1	0.0426718	0.00170082	-1.08291	down	-1.08291	0.067525	0.0124174	-0.934545	down	-0.934545
MRPS30	0.0426718	0.0016842	-0.966378	down	-0.966378	0.0119681	0.000743455	-0.964785	down	-0.964785
ADIRF	0.0426718	0.00171838	1.84642	up	1.84642	0.187847	0.0677748	0.764287	up	0.764287
AGAP11	0.0426718	0.00171838	1.84642	up	1.84642	0.187847	0.0677748	0.764287	up	0.764287
LOC124903189	0.0426718	0.00171861	-0.886126	down	-0.886126	0.00220603	5.0871e-05	-1.23719	down	-1.23719
NT5C2	0.0426718	0.00171075	1.83474	up	1.83474	0.0349301	0.00425509	1.39375	up	1.39375
KAZN	0.0426718	0.00166503	-1.3685	down	-1.3685	0.0165276	0.00128256	1.42614	up	1.42614
HMGN2P46	0.0426718	0.00170082	-1.08291	down	-1.08291	0.067525	0.0124174	-0.934545	down	-0.934545
ZNF181	0.0426718	0.00169294	1.32082	up	1.32082	0.237084	0.0979368	1.0416	up	1.0416
ZNF517	0.0426718	0.00167011	1.43279	up	1.43279	0.0883099	0.0194779	-0.678715	down	-0.678715
MIR17	0.0426718	0.00171861	-0.886126	down	-0.886126	0.00220603	5.0871e-05	-1.23719	down	-1.23719
MIR18A	0.0426718	0.00171861	-0.886126	down	-0.886126	0.00220603	5.0871e-05	-1.23719	down	-1.23719
MIR19A	0.0426718	0.00171861	-0.886126	down	-0.886126	0.00220603	5.0871e-05	-1.23719	down	-1.23719
MIR19B1	0.0426718	0.00171861	-0.886126	down	-0.886126	0.00220603	5.0871e-05	-1.23719	down	-1.23719
MIR20A	0.0426718	0.00171861	-0.886126	down	-0.886126	0.00220603	5.0871e-05	-1.23719	down	-1.23719
MIR92A1	0.0426718	0.00171861	-0.886126	down	-0.886126	0.00220603	5.0871e-05	-1.23719	down	-1.23719
MIR17HG	0.0426718	0.00171861	-0.886126	down	-0.886126	0.00220603	5.0871e-05	-1.23719	down	-1.23719
UBAP2	0.0426718	0.0017139	1.66451	up	1.66451	0.0888284	0.0196495	-0.856347	down	-0.856347
JPH2	0.0426718	0.00166554	-0.97479	down	-0.97479
FAM25A	0.0426718	0.00171838	1.84642	up	1.84642	0.187847	0.0677748	0.764287	up	0.764287
LOC645485	0.0426718	0.00171473	1.19619	up	1.19619	0.38167	0.210786	0.625573	up	0.625573
SNORA5A	0.0426718	0.00169811	-0.785043	down	-0.785043	0.721147	0.560082	-0.43696	down	-0.43696
BMPR1B	0.0426718	0.00172266	1.20724	up	1.20724	0.0438388	0.00609961	1.30504	up	1.30504
CAPRIN2	0.0426718	0.00171473	1.19619	up	1.19619	0.38167	0.210786	0.625573	up	0.625573
SNORA5B	0.0426718	0.00169811	-0.785043	down	-0.785043	0.721147	0.560082	-0.43696	down	-0.43696
SNORA5C	0.0426718	0.00169811	-0.785043	down	-0.785043	0.721147	0.560082	-0.43696	down	-0.43696
TRPC1	0.0426718	0.00169408	-0.888053	down	-0.888053	0.234277	0.0959234	0.837575	up	0.837575
C15orf48	0.0426718	0.00170082	-1.08291	down	-1.08291
STON2	0.0426718	0.00170304	-1.23077	down	-1.23077	0.793923	0.648849	0.326813	mixed	0.326813
LDB1	0.0426718	0.00166326	-1.32715	down	-1.32715	0.00379217	0.000117852	1.18054	up	1.18054
TBRG4	0.0426718	0.00169811	-0.785043	down	-0.785043	0.721147	0.560082	-0.43696	down	-0.43696
TCAF1	0.0426718	0.00168025	-1.04965	down	-1.04965	0.0229041	0.00216905	-0.872821	down	-0.872821
RBAK-RBAKDN	0.042674	0.00173818	-0.844161	down	-0.844161	0.160795	0.0530358	0.542151	up	0.542151
ANO3-AS1	0.042674	0.00174208	-1.16019	down	-1.16019
STK35	0.042674	0.00174186	-0.970184	down	-0.970184	0.249528	0.106015	1.07241	up	1.07241
RBAKDN	0.042674	0.00173818	-0.844161	down	-0.844161	0.160795	0.0530358	0.542151	up	0.542151
RNF216P1	0.042674	0.00173818	-0.844161	down	-0.844161	0.160795	0.0530358	0.542151	up	0.542151
CSNK1G1	0.042674	0.00173007	-1.39064	down	-1.39064	0.0694463	0.012953	-1.00978	down	-1.00978
PPIB	0.042674	0.00173007	-1.39064	down	-1.39064	0.704919	0.538199	0.266334	mixed	0.266334
RBAK	0.042674	0.00173818	-0.844161	down	-0.844161	0.160795	0.0530358	0.542151	up	0.542151
ANO3	0.042674	0.00174208	-1.16019	down	-1.16019
ANTKMT	0.042674	0.00173154	1.79238	up	1.79238	0.00595369	0.000246835	1.41711	up	1.41711
METRN	0.042674	0.00173154	1.79238	up	1.79238	0.00595369	0.000246835	1.41711	up	1.41711
PCLAF	0.042674	0.00173007	-1.39064	down	-1.39064	0.0694463	0.012953	-1.00978	down	-1.00978
MZF1-AS1	0.0428819	0.00176247	1.09352	up	1.09352	0.300707	0.143867	-0.984899	down	-0.984899
CEBPB	0.0428819	0.00176721	1.09757	up	1.09757	0.05307	0.00836374	1.31185	up	1.31185
BCL2L1-AS1	0.0428819	0.00175402	1.63447	up	1.63447
LOC107987272	0.0428819	0.00176247	1.09352	up	1.09352	0.490399	0.309684	-0.42665	mixed	-0.42665
GCDH	0.0428819	0.00176033	-1.30013	down	-1.30013	0.993185	0.97379	0.0113761	mixed	0.0113761
ANKRD33B	0.0428819	0.00176539	1.56158	up	1.56158	0.208996	0.0803158	-0.881047	down	-0.881047
CENPBD2P	0.0428819	0.00176247	1.09352	up	1.09352	0.300707	0.143867	-0.984899	down	-0.984899
TNFAIP2	0.0428819	0.00176676	1.3453	up	1.3453	0.542771	0.359562	-0.748356	down	-0.748356
LOC105369728	0.0429746	0.00177381	1.27833	up	1.27833	0.0906715	0.0203861	-0.687764	down	-0.687764
MED8	0.043025	0.00177868	-0.837748	down	-0.837748	0.365961	0.197378	0.615291	up	0.615291
PACS2	0.0431165	0.00178525	1.00318	up	1.00318	0.373015	0.203752	0.601924	up	0.601924
TEX22	0.0431165	0.00178525	1.00318	up	1.00318	0.373015	0.203752	0.601924	up	0.601924
MTA1	0.0431165	0.00178525	1.00318	up	1.00318	0.373015	0.203752	0.601924	up	0.601924
MIR4633	0.0435474	0.00180591	-0.856233	down	-0.856233	0.0290034	0.00321446	-0.863985	down	-0.863985
ISOC1	0.0435474	0.00180591	-0.856233	down	-0.856233	0.0290034	0.00321446	-0.863985	down	-0.863985
LOC105374800	0.0436129	0.00181432	-1.25343	down	-1.25343	0.217232	0.0853141	0.553299	up	0.553299
RAB11FIP5	0.0436129	0.00181432	-1.25343	down	-1.25343	0.217232	0.0853141	0.553299	up	0.553299
BCOR	0.0436129	0.00181709	1.8319	up	1.8319	0.387099	0.215377	-0.952443	down	-0.952443
SFXN5	0.0436129	0.00181432	-1.25343	down	-1.25343	0.217232	0.0853141	0.553299	up	0.553299
UQCC4	0.043734	0.00182496	1.12086	up	1.12086	8.47463e-06	1.81152e-08	2.33257	up	2.33257
LINC01344	0.0437915	0.00183019	-1.07106	down	-1.07106	2.2246e-06	2.73789e-09	-2.26948	down	-2.26948
MALT1-AS1	0.0438385	0.00183783	-0.877639	down	-0.877639	0.499605	0.318054	0.725831	up	0.725831
LOC105372146	0.0438385	0.00183783	-0.877639	down	-0.877639	0.499605	0.318054	0.725831	up	0.725831
MALT1	0.0438385	0.00183783	-0.877639	down	-0.877639	0.499605	0.318054	0.725831	up	0.725831
LOC105369370	0.0439017	0.00185184	1.39219	up	1.39219	0.71502	0.551369	-0.210574	mixed	-0.210574
MYEOV	0.0439017	0.00185184	1.39219	up	1.39219	0.71502	0.551369	-0.210574	mixed	-0.210574
LOC442028	0.0439017	0.00184805	-1.01504	down	-1.01504	0.014353	0.00100503	-1.08929	down	-1.08929
ULK1	0.0439017	0.00184926	1.08366	up	1.08366	0.478806	0.298083	0.794611	up	0.794611
KLRG1	0.0440928	0.00186561	-0.81369	down	-0.81369	0.217724	0.0857055	-0.925218	down	-0.925218
M6PR	0.0440928	0.00186561	-0.81369	down	-0.81369	0.217724	0.0857055	-0.925218	down	-0.925218
TBCA	0.0441221	0.0018697	-0.861323	down	-0.861323	0.714816	0.551125	0.205592	mixed	0.205592
FZD4-DT	0.044174	0.00187948	-0.870349	down	-0.870349	0.251251	0.107137	0.855169	up	0.855169
PRSS23	0.044174	0.00187948	-0.870349	down	-0.870349	0.251251	0.107137	0.855169	up	0.855169
RGS17	0.044174	0.00188095	-0.990146	down	-0.990146	0.00834292	0.000410715	-1.25091	down	-1.25091
MTRF1L	0.044174	0.00188095	-0.990146	down	-0.990146	0.00834292	0.000410715	-1.25091	down	-1.25091
FZD4	0.044174	0.00187948	-0.870349	down	-0.870349	0.251251	0.107137	0.855169	up	0.855169
CD164	0.044174	0.00188333	1.14613	up	1.14613	0.407845	0.233326	-0.69409	down	-0.69409
ALKBH8	0.0442205	0.00188817	-1.26119	down	-1.26119	0.94722	0.870914	-0.16322	mixed	-0.16322
GARIN2	0.0443367	0.001896	-1.13311	down	-1.13311
SNORD16	0.0444776	0.00190491	1.26152	up	1.26152	0.144554	0.0442896	-0.972363	down	-0.972363
SNORD18A	0.0444776	0.00190491	1.26152	up	1.26152	0.144554	0.0442896	-0.972363	down	-0.972363
SNORD18B	0.0444776	0.00190491	1.26152	up	1.26152	0.144554	0.0442896	-0.972363	down	-0.972363
SNORD18C	0.0444776	0.00190491	1.26152	up	1.26152	0.144554	0.0442896	-0.972363	down	-0.972363
RPL4	0.0444776	0.00190491	1.26152	up	1.26152	0.144554	0.0442896	-0.972363	down	-0.972363
CSNK1G1	0.0446948	0.0019171	-1.39064	down	-1.39064	0.0694463	0.012953	-1.00978	down	-1.00978
PCLAF	0.0446948	0.0019171	-1.39064	down	-1.39064	0.0694463	0.012953	-1.00978	down	-1.00978
LOC105371062	0.0447543	0.00192255	1.30517	up	1.30517	0.458117	0.279031	0.322192	mixed	0.322192
SNAP23	0.0447696	0.0019261	1.72378	up	1.72378	0.219031	0.0864602	-0.570447	down	-0.570447
ZSCAN16	0.0449485	0.00193671	-1.28856	down	-1.28856	0.317288	0.157457	-0.532084	down	-0.532084
MIR4678	0.0452775	0.00195966	-1.31102	down	-1.31102	0.973139	0.920252	-0.299002	mixed	-0.299002
MIR6751	0.0452775	0.00195967	1.29798	up	1.29798	0.300115	0.143409	-0.593642	down	-0.593642
LOC112268064	0.0452775	0.00195966	-1.31102	down	-1.31102	0.973139	0.920252	-0.299002	mixed	-0.299002
FAU	0.0452775	0.00195967	1.29798	up	1.29798	0.300115	0.143409	-0.593642	down	-0.593642
SYVN1	0.0452775	0.00195967	1.29798	up	1.29798	0.300115	0.143409	-0.593642	down	-0.593642
MINPP1	0.0452775	0.00195966	-1.31102	down	-1.31102	0.973139	0.920252	-0.299002	mixed	-0.299002
PLCB1-IT1	0.045542	0.00197562	-1.28053	down	-1.28053	0.905369	0.804792	-0.0796373	mixed	-0.0796373
LOC105372522	0.045542	0.00197562	-1.28053	down	-1.28053	0.905369	0.804792	-0.0796373	mixed	-0.0796373
FAT3	0.045542	0.00197701	1.14551	up	1.14551
PLCB1	0.045542	0.00197562	-1.28053	down	-1.28053	0.905369	0.804792	-0.0796373	mixed	-0.0796373
RNU105B	0.045542	0.00197562	-1.28053	down	-1.28053	0.905369	0.804792	-0.0796373	mixed	-0.0796373
KCNH4	0.0458831	0.00199479	-1.19266	down	-1.19266	0.093862	0.0217418	1.15437	up	1.15437
HCRT	0.0458831	0.00199479	-1.19266	down	-1.19266	0.97414	0.923029	-0.0330192	mixed	-0.0330192
RAB5C	0.0458831	0.00199479	-1.19266	down	-1.19266	0.0776712	0.0157576	-0.679354	down	-0.679354
OSBPL7	0.0459044	0.00200121	-1.37082	down	-1.37082	0.193445	0.0713235	-0.452673	down	-0.452673
MRPL10	0.0459044	0.00200121	-1.37082	down	-1.37082	0.193445	0.0713235	-0.452673	down	-0.452673
RHOQ	0.0459044	0.00200165	1.47713	up	1.47713	0.2451	0.102673	0.780561	up	0.780561
LOC124903189	0.0459141	0.00200505	-0.886126	down	-0.886126	0.00220603	5.0871e-05	-1.23719	down	-1.23719
MIR17	0.0459141	0.00200505	-0.886126	down	-0.886126	0.00220603	5.0871e-05	-1.23719	down	-1.23719
MIR18A	0.0459141	0.00200505	-0.886126	down	-0.886126	0.00220603	5.0871e-05	-1.23719	down	-1.23719
MIR19A	0.0459141	0.00200505	-0.886126	down	-0.886126	0.00220603	5.0871e-05	-1.23719	down	-1.23719
MIR19B1	0.0459141	0.00200505	-0.886126	down	-0.886126	0.00220603	5.0871e-05	-1.23719	down	-1.23719
MIR20A	0.0459141	0.00200505	-0.886126	down	-0.886126	0.00220603	5.0871e-05	-1.23719	down	-1.23719
MIR92A1	0.0459141	0.00200505	-0.886126	down	-0.886126	0.00220603	5.0871e-05	-1.23719	down	-1.23719
MIR17HG	0.0459141	0.00200505	-0.886126	down	-0.886126	0.00220603	5.0871e-05	-1.23719	down	-1.23719
SPATA4	0.046029	0.0020141	-1.07884	down	-1.07884	0.0218288	0.00201914	-1.25111	down	-1.25111
SPAAR	0.046029	0.00201602	-1.21693	down	-1.21693
HRCT1	0.046029	0.00201602	-1.21693	down	-1.21693
PPP1R14B-AS1	0.046074	0.00202798	1.00847	up	1.00847	0.00205907	4.56148e-05	1.48768	up	1.48768
LOC114841035	0.046074	0.00202798	1.00847	up	1.00847	0.00205907	4.56148e-05	1.48768	up	1.48768
C1orf21-DT	0.046074	0.00202991	-1.16744	down	-1.16744	0.0838569	0.0179034	-0.964428	down	-0.964428
FKBP2	0.046074	0.00202798	1.00847	up	1.00847	0.00205907	4.56148e-05	1.48768	up	1.48768
VEGFB	0.046074	0.00202798	1.00847	up	1.00847	0.00124881	2.08221e-05	1.02972	up	1.02972
C1orf21	0.046074	0.00202991	-1.16744	down	-1.16744	0.0838569	0.0179034	-0.964428	down	-0.964428
UBOX5	0.0466063	0.00205638	-1.23984	down	-1.23984	0.0554091	0.00904662	0.953525	up	0.953525
FASTKD5	0.0466063	0.00205638	-1.23984	down	-1.23984	0.0554091	0.00904662	0.953525	up	0.953525
LZTS3	0.0466063	0.00205638	-1.23984	down	-1.23984	0.0554091	0.00904662	0.953525	up	0.953525
LINC00534	0.0468492	0.00207887	-1.03613	down	-1.03613	0.141762	0.0429381	-0.836937	down	-0.836937
LOC105375633	0.0468492	0.00207887	-1.03613	down	-1.03613	0.141762	0.0429381	-0.836937	down	-0.836937
RBM12B-DT	0.0468492	0.00208529	-0.774416	down	-0.774416	0.103494	0.0255014	-0.682559	down	-0.682559
TMEM64	0.0468492	0.00207887	-1.03613	down	-1.03613	0.141762	0.0429381	-0.836937	down	-0.836937
ZNF330	0.0468492	0.00208388	-1.19	down	-1.19	0.0286155	0.00314399	-1.08154	down	-1.08154
RBM12B	0.0468492	0.00208529	-0.774416	down	-0.774416	0.103494	0.0255014	-0.682559	down	-0.682559
RBM12B-AS1	0.0468492	0.00208529	-0.774416	down	-0.774416	0.103494	0.0255014	-0.682559	down	-0.682559
SET	0.0468492	0.00208078	1.25835	up	1.25835	0.189628	0.0688834	0.93773	up	0.93773
CLVS1	0.0469813	0.00209671	-1.21881	down	-1.21881
PTPRE	0.0469813	0.00209725	-0.948979	down	-0.948979	0.431467	0.255196	-0.561797	down	-0.561797
C14orf28	0.0470157	0.00210486	-0.767476	down	-0.767476	0.0152909	0.00111886	-0.878251	down	-0.878251
RASSF4	0.0470157	0.00210242	1.64249	up	1.64249	0.108719	0.0276834	-0.786606	down	-0.786606
SERINC5	0.0470497	0.00210943	-1.00717	down	-1.00717	0.995069	0.982178	-0.00780987	mixed	-0.00780987
MATN3	0.0470922	0.00211438	-1.23873	down	-1.23873	0.367359	0.198673	-0.701119	down	-0.701119
WDR35	0.0470922	0.00211438	-1.23873	down	-1.23873	0.367359	0.198673	-0.701119	down	-0.701119
LOXL1-AS1	0.0470937	0.00211749	1.11166	up	1.11166	0.996053	0.987214	-0.00387388	mixed	-0.00387388
TRAF1	0.0472145	0.00212598	1.76996	up	1.76996	0.283772	0.130472	0.567512	mixed	0.567512
GPN1	0.0472607	0.00213418	-1.11527	down	-1.11527	0.0112002	0.000660199	-0.951945	down	-0.951945
CCDC121	0.0472607	0.00213418	-1.11527	down	-1.11527	0.0112002	0.000660199	-0.951945	down	-0.951945
ZNF512	0.0472607	0.00213418	-1.11527	down	-1.11527	0.0112002	0.000660199	-0.951945	down	-0.951945
FOXN3	0.0474524	0.00215582	-1.17454	down	-1.17454	0.055195	0.00895737	-0.801399	down	-0.801399
LINC00294	0.0474524	0.00215818	0.920888	up	0.920888	0.159096	0.0520328	0.59419	up	0.59419
MIR190A	0.0474524	0.00215494	1.81997	up	1.81997	0.89975	0.796592	0.319123	mixed	0.319123
RNF138	0.0474524	0.00214812	-1.19089	down	-1.19089	0.0215399	0.00196451	-0.702262	down	-0.702262
RNF125	0.0474524	0.00214812	-1.19089	down	-1.19089	0.0215399	0.00196451	-0.702262	down	-0.702262
TCP11L1	0.0474524	0.00215818	0.920888	up	0.920888	0.159096	0.0520328	0.59419	up	0.59419
TDP1	0.0474524	0.00215582	-1.17454	down	-1.17454	0.055195	0.00895737	-0.801399	down	-0.801399
TLN2	0.0474524	0.00215494	1.81997	up	1.81997	0.89975	0.796592	0.319123	mixed	0.319123
EFCAB11	0.0474524	0.00215582	-1.17454	down	-1.17454	0.055195	0.00895737	-0.801399	down	-0.801399
LINC01730	0.0475709	0.00216665	-1.32166	down	-1.32166	0.0644652	0.0115501	-1.13802	down	-1.13802
CDC25B	0.0475709	0.00216665	-1.32166	down	-1.32166	0.0644652	0.0115501	-1.13802	down	-1.13802
RPL36A-HNRNPH2	0.0479467	0.00219307	-1.18981	down	-1.18981	0.147162	0.0454171	-0.663844	down	-0.663844
TIMM8A	0.0479467	0.00219307	-1.18981	down	-1.18981	0.130983	0.0376454	-0.668875	down	-0.668875
GLA	0.0479467	0.00219307	-1.18981	down	-1.18981	0.147162	0.0454171	-0.663844	down	-0.663844
HPF1	0.0479467	0.00218943	-1.19137	down	-1.19137	0.146856	0.045261	-0.652349	down	-0.652349
RPL36A	0.0479467	0.00219307	-1.18981	down	-1.18981	0.147162	0.0454171	-0.663844	down	-0.663844
BTK	0.0479467	0.00219307	-1.18981	down	-1.18981	0.130983	0.0376454	-0.668875	down	-0.668875
ENOX2	0.0479711	0.00219729	-1.23873	down	-1.23873	0.665179	0.492701	-0.404929	down	-0.404929
SLC22A20P	0.0488572	0.00224736	1.33432	up	1.33432	0.0957564	0.0224784	0.951433	up	0.951433
CAPN1-AS1	0.0488572	0.00224736	1.33432	up	1.33432	0.0957564	0.0224784	0.951433	up	0.951433
CAPN1	0.0488572	0.00224736	1.33432	up	1.33432	0.0957564	0.0224784	0.951433	up	0.951433
PSMG3	0.0488572	0.00224252	0.836932	up	0.836932	0.961623	0.892994	-0.139701	mixed	-0.139701
CD247	0.049006	0.00225738	1.83599	up	1.83599	0.598095	0.419496	0.468404	mixed	0.468404
AHNAK2	0.049113	0.00226548	1.22373	up	1.22373	0.746562	0.590605	0.487747	mixed	0.487747
TENT4A	0.0492353	0.00227431	-0.807382	down	-0.807382	0.00035265	3.4036e-06	-0.84392	down	-0.84392
LOC101929609	0.0495309	0.00230078	0.784989	up	0.784989	0.454857	0.275984	0.463678	up	0.463678
LOC124903189	0.0495309	0.00229148	-0.886126	down	-0.886126	0.00220603	5.0871e-05	-1.23719	down	-1.23719
DPH2	0.0495309	0.00230078	0.784989	up	0.784989	0.0243715	0.00239642	-0.907853	down	-0.907853
MIR17	0.0495309	0.00229148	-0.886126	down	-0.886126	0.00220603	5.0871e-05	-1.23719	down	-1.23719
MIR18A	0.0495309	0.00229148	-0.886126	down	-0.886126	0.00220603	5.0871e-05	-1.23719	down	-1.23719
MIR19A	0.0495309	0.00229148	-0.886126	down	-0.886126	0.00220603	5.0871e-05	-1.23719	down	-1.23719
MIR19B1	0.0495309	0.00229148	-0.886126	down	-0.886126	0.00220603	5.0871e-05	-1.23719	down	-1.23719
MIR20A	0.0495309	0.00229148	-0.886126	down	-0.886126	0.00220603	5.0871e-05	-1.23719	down	-1.23719
MIR92A1	0.0495309	0.00229148	-0.886126	down	-0.886126	0.00220603	5.0871e-05	-1.23719	down	-1.23719
MIR17HG	0.0495309	0.00229148	-0.886126	down	-0.886126	0.00220603	5.0871e-05	-1.23719	down	-1.23719
GFRA4	0.0495309	0.00229938	-1.09602	down	-1.09602
IPO13	0.0495309	0.00230078	0.784989	up	0.784989	0.0243715	0.00239642	-0.907853	down	-0.907853
GPR84-AS1	0.0495383	0.00230754	-0.986968	down	-0.986968	0.129375	0.0368063	0.932889	mixed	0.932889
COPZ1	0.0495383	0.00230754	-0.986968	down	-0.986968	0.129375	0.0368063	0.932889	mixed	0.932889
NMNAT2	0.0495383	0.00230452	-1.13036	down	-1.13036	0.278029	0.125675	-0.602695	down	-0.602695
MIR148B	0.0495383	0.00230754	-0.986968	down	-0.986968	0.39776	0.225366	0.61484	up	0.61484
DNM1P35	0.0498859	0.00232695	-0.927768	down	-0.927768	0.140305	0.0424418	-0.748309	down	-0.748309
RHOBTB3	0.0501073	0.00234052	1.69976	up	1.69976	0.584529	0.403143	-0.776394	down	-0.776394
MAGED1	0.0506723	0.0023702	-1.16781	down	-1.16781
SESN3	0.0507479	0.00237701	-1.06415	down	-1.06415	0.34175	0.177272	0.609982	mixed	0.609982
MIR1282	0.050969	0.00239067	-1.19396	down	-1.19396	0.0672639	0.0123171	1.15949	up	1.15949
SERINC4	0.050969	0.00239067	-1.19396	down	-1.19396	0.0672639	0.0123171	1.15949	up	1.15949
ELL3	0.050969	0.00239067	-1.19396	down	-1.19396	0.0672639	0.0123171	1.15949	up	1.15949
TRIM59-IFT80	0.0509868	0.00239787	-1.4065	down	-1.4065	0.000668788	8.57754e-06	-1.53458	down	-1.53458
KCTD21-AS1	0.0509868	0.0024131	-0.737065	down	-0.737065	0.35497	0.188223	0.607388	up	0.607388
IL12A-AS1	0.0509868	0.00239787	-1.4065	down	-1.4065	0.000668788	8.57754e-06	-1.53458	down	-1.53458
VOPP1-DT	0.0509868	0.00240736	-1.00081	down	-1.00081	0.100634	0.0242492	-0.684858	down	-0.684858
GADD45A	0.0509868	0.00240641	-0.932968	down	-0.932968	0.000621145	7.57723e-06	-1.07968	down	-1.07968
TRIM59	0.0509868	0.00239787	-1.4065	down	-1.4065	0.00157048	2.99487e-05	-0.918278	down	-0.918278
ARK2C	0.0509868	0.00241051	-1.1303	down	-1.1303	0.862343	0.739802	0.106839	up	0.106839
IFT80	0.0509868	0.00239787	-1.4065	down	-1.4065	0.00362626	0.000107815	-0.918278	down	-0.918278
ALG8	0.0509868	0.0024131	-0.737065	down	-0.737065	0.35497	0.188223	0.607388	up	0.607388
PRSS12	0.0509868	0.00241459	-1.39452	down	-1.39452	0.40698	0.232673	-0.76063	down	-0.76063
RNFT1-DT	0.0509972	0.00243818	-0.771545	down	-0.771545	0.0568964	0.00948273	1.28738	up	1.28738
MRPL58	0.0509972	0.00241992	-0.819284	down	-0.819284	0.0637576	0.0113289	1.06455	up	1.06455
TUBD1	0.0509972	0.00243818	-0.771545	down	-0.771545	0.36208	0.19401	0.680137	mixed	0.680137
KIZ	0.0509972	0.00243409	-0.6558	down	-0.6558	0.132236	0.0382092	-0.714746	down	-0.714746
RHBG	0.0509972	0.00243288	-1.01263	down	-1.01263	0.978211	0.934335	0.0276865	mixed	0.0276865
KCNT1	0.0509972	0.00242479	-1.18938	down	-1.18938	0.0161333	0.00123607	1.17258	up	1.17258
RPS6KB1	0.0509972	0.00243818	-0.771545	down	-0.771545	0.0568964	0.00948273	1.28738	up	1.28738
ILKAP	0.0509972	0.00243258	-0.801659	down	-0.801659	0.840596	0.708556	-0.113212	mixed	-0.113212
ARL13B	0.0511805	0.00245741	-1.10791	down	-1.10791	0.138819	0.0417969	-0.699432	down	-0.699432
KRCC1	0.0511805	0.00245669	1.0893	up	1.0893	0.209821	0.0808124	0.643898	up	0.643898
SCRN3	0.0511805	0.00246018	1.41198	up	1.41198	0.0952489	0.0222692	-0.954451	down	-0.954451
CIR1	0.0511805	0.00246018	1.41198	up	1.41198	0.0952489	0.0222692	-0.954451	down	-0.954451
PHC3	0.0511849	0.00246371	1.1758	up	1.1758	0.00242578	5.92835e-05	0.689992	up	0.689992
MEIS3	0.0514375	0.00247919	1.12541	up	1.12541	0.067525	0.0124042	0.917142	up	0.917142
H6PD	0.0514424	0.00248276	1.53876	up	1.53876	0.975783	0.929516	-0.0183852	mixed	-0.0183852
MIR6847	0.0514525	0.00248657	-0.863626	down	-0.863626	0.294546	0.138764	-0.543029	down	-0.543029
EXOSC4	0.0514525	0.00248657	-0.863626	down	-0.863626	0.294546	0.138764	-0.543029	down	-0.543029
GPAA1	0.0514525	0.00248657	-0.863626	down	-0.863626	0.294546	0.138764	-0.543029	down	-0.543029
BLOC1S5-TXNDC5	0.0515988	0.00249699	-1.01103	down	-1.01103	0.0909222	0.0205035	-0.802064	down	-0.802064
TXNDC5	0.0515988	0.00249699	-1.01103	down	-1.01103	0.132036	0.0381107	-0.711521	down	-0.711521
SMG8	0.05178	0.0025091	-1.32392	down	-1.32392	0.0136378	0.000913516	-1.33503	down	-1.33503
PRR11	0.05178	0.0025091	-1.32392	down	-1.32392	0.0136378	0.000913516	-1.33503	down	-1.33503
SNORD58C	0.0518136	0.00251478	-0.951873	down	-0.951873	0.104133	0.0257263	-0.784178	down	-0.784178
RPL17-C18orf32	0.0518136	0.00251478	-0.951873	down	-0.951873	0.104133	0.0257263	-0.784178	down	-0.784178
LOC124906290	0.0518136	0.00252102	-0.83055	down	-0.83055	0.262033	0.114411	-0.450738	down	-0.450738
SNORD58B	0.0518136	0.00251478	-0.951873	down	-0.951873	0.181485	0.0643157	-0.784178	down	-0.784178
SNORD58A	0.0518136	0.00251478	-0.951873	down	-0.951873	0.181485	0.0643157	-0.784178	down	-0.784178
C18orf32	0.0518136	0.00251478	-0.951873	down	-0.951873	0.104133	0.0257263	-0.784178	down	-0.784178
MRPS22	0.0518136	0.00252102	-0.83055	down	-0.83055	0.262033	0.114411	-0.450738	down	-0.450738
RAB3IL1	0.0518136	0.00252266	1.26513	up	1.26513	0.229224	0.092741	0.876896	up	0.876896
BPESC1	0.0518136	0.00252102	-0.83055	down	-0.83055	0.386031	0.21452	-0.450738	down	-0.450738
RPL17	0.0518136	0.00251478	-0.951873	down	-0.951873	0.104133	0.0257263	-0.784178	down	-0.784178
SSRP1	0.0518136	0.00252414	-1.26877	mixed	-1.26877	0.155331	0.0497838	0.790783	up	0.790783
TNKS1BP1	0.0518136	0.00252414	-1.26877	mixed	-1.26877	0.155331	0.0497838	0.790783	up	0.790783
ECE1-AS1	0.0519126	0.00253232	1.27845	up	1.27845	0.0260677	0.00268648	1.32379	up	1.32379
NOL4L-DT	0.0520262	0.00255098	1.22114	up	1.22114
SAMD15	0.0520262	0.00254892	-1.21692	down	-1.21692	0.873354	0.755685	0.37454	mixed	0.37454
TMED8	0.0520262	0.00254892	-1.21692	down	-1.21692	0.873354	0.755685	0.37454	mixed	0.37454
PLEC	0.0520262	0.00255133	1.48381	up	1.48381	0.898477	0.795348	-0.321194	mixed	-0.321194
MIR661	0.0520262	0.00255133	1.48381	up	1.48381	0.907149	0.80755	-0.311656	mixed	-0.311656
PARP10	0.0520262	0.00255133	1.48381	up	1.48381	0.898477	0.795348	-0.321194	mixed	-0.321194
SETBP1	0.0521965	0.00257163	1.21619	up	1.21619	0.536826	0.353364	-0.75582	down	-0.75582
KLC1	0.0521965	0.00257656	-0.767971	down	-0.767971	0.0668526	0.0121814	1.06204	up	1.06204
UBE2R2	0.0521965	0.00256741	1.65407	up	1.65407	0.00286112	7.69117e-05	1.55107	up	1.55107
COA8	0.0521965	0.00257656	-0.767971	down	-0.767971	0.0668526	0.0121814	1.06204	up	1.06204
NIPSNAP1	0.0521965	0.00257009	-1.16952	down	-1.16952	0.0562651	0.00926454	-0.977551	down	-0.977551
THOC5	0.0521965	0.00257009	-1.16952	down	-1.16952	0.0562651	0.00926454	-0.977551	down	-0.977551
BAG5	0.0521965	0.00257656	-0.767971	down	-0.767971	0.172146	0.0591386	-0.545243	down	-0.545243
KANK4	0.0524794	0.00259541	-1.03102	down	-1.03102	0.803261	0.659605	-0.22293	down	-0.22293
TMPRSS6	0.0524794	0.00259732	-1.10404	down	-1.10404
UBE2R2-AS1	0.0527468	0.00263498	1.65407	up	1.65407	0.00286112	7.69117e-05	1.55107	up	1.55107
ZNF133-AS1	0.0527468	0.00262206	1.12317	up	1.12317
LOC105377223	0.0527468	0.00264126	-1.09532	down	-1.09532
GLRX3	0.0527468	0.00263336	1.54124	up	1.54124	0.17217	0.0591747	-1.01104	down	-1.01104
LOC124902561	0.0527468	0.00263336	1.54124	up	1.54124	0.17217	0.0591747	-1.01104	down	-1.01104
TXLNGY	0.0527468	0.00264126	-1.09532	down	-1.09532
GLI1	0.0527468	0.00262764	1.44106	up	1.44106	0.519628	0.336994	0.345341	up	0.345341
BCORP1	0.0527468	0.00264126	-1.09532	down	-1.09532
INHBC	0.0527468	0.00262764	1.44106	up	1.44106	0.519628	0.336994	0.345341	up	0.345341
NSMCE4A	0.0527468	0.00262409	-0.935379	down	-0.935379	0.820068	0.680787	-0.328788	mixed	-0.328788
INHBE	0.0527468	0.00262764	1.44106	up	1.44106	0.519628	0.336994	0.345341	up	0.345341
MILIP	0.0527468	0.00261651	1.20744	up	1.20744	0.035722	0.00442186	1.03963	up	1.03963
HOXA10-AS	0.0529074	0.00265855	1.2794	up	1.2794	0.931962	0.843704	-0.0649406	down	-0.0649406
LOC100996437	0.0529074	0.00266124	-1.05041	down	-1.05041	0.329705	0.167373	1.09181	up	1.09181
ICA1L	0.0529074	0.002663	1.3862	up	1.3862	0.278012	0.125644	-0.587036	down	-0.587036
KCTD7	0.0529074	0.00266124	-1.05041	down	-1.05041	0.329705	0.167373	1.09181	up	1.09181
RABGEF1	0.0529074	0.00266124	-1.05041	down	-1.05041	0.329705	0.167373	1.09181	up	1.09181
WDR12	0.0529074	0.002663	1.3862	up	1.3862	0.278012	0.125644	-0.587036	down	-0.587036
DYSF	0.0529074	0.00265342	1.21289	up	1.21289	0.116016	0.030661	-0.946405	down	-0.946405
LOC105376892	0.0529289	0.0026675	0.905772	up	0.905772	0.858777	0.734305	-0.258883	mixed	-0.258883
MZF1	0.0529915	0.00267409	1.09352	up	1.09352	0.236755	0.0976243	-0.984899	down	-0.984899
UBE2M	0.0529915	0.00267409	1.09352	up	1.09352	0.236755	0.0976243	-0.984899	down	-0.984899
MCTS2	0.0532795	0.00269207	1.91388	up	1.91388	0.20485	0.0777841	0.488319	up	0.488319
LOC107985416	0.0532795	0.00269207	1.91388	up	1.91388	0.0813165	0.0170488	-0.743056	down	-0.743056
HM13	0.0532795	0.00269207	1.91388	up	1.91388	0.0813165	0.0170488	-0.743056	down	-0.743056
MIR4466	0.0534932	0.00270632	1.0011	up	1.0011	0.0147544	0.00105225	1.25731	up	1.25731
LOC115308161	0.0534932	0.00270632	1.0011	up	1.0011	0.0147544	0.00105225	1.25731	up	1.25731
MIR4503	0.0536654	0.00272198	-1.36384	down	-1.36384	0.0869594	0.0190277	-0.583019	down	-0.583019
LOC124903189	0.0536654	0.00272113	-0.886126	down	-0.886126	0.00220603	5.0871e-05	-1.23719	down	-1.23719
MIR17	0.0536654	0.00272113	-0.886126	down	-0.886126	0.00220603	5.0871e-05	-1.23719	down	-1.23719
MIR18A	0.0536654	0.00272113	-0.886126	down	-0.886126	0.00220603	5.0871e-05	-1.23719	down	-1.23719
MIR19A	0.0536654	0.00272113	-0.886126	down	-0.886126	0.00220603	5.0871e-05	-1.23719	down	-1.23719
MIR19B1	0.0536654	0.00272113	-0.886126	down	-0.886126	0.00220603	5.0871e-05	-1.23719	down	-1.23719
MIR20A	0.0536654	0.00272113	-0.886126	down	-0.886126	0.00220603	5.0871e-05	-1.23719	down	-1.23719
MIR92A1	0.0536654	0.00272113	-0.886126	down	-0.886126	0.00220603	5.0871e-05	-1.23719	down	-1.23719
MIR17HG	0.0536654	0.00272113	-0.886126	down	-0.886126	0.00220603	5.0871e-05	-1.23719	down	-1.23719
SLC25A21	0.0536654	0.00272198	-1.36384	down	-1.36384	0.0869594	0.0190277	-0.583019	down	-0.583019
DPH2	0.0537159	0.00272802	-0.825967	down	-0.825967	0.0243715	0.00239642	-0.907853	down	-0.907853
ATP6V0B	0.0537159	0.00272802	-0.825967	down	-0.825967	0.0243715	0.00239642	-0.907853	down	-0.907853
IPO13	0.0537159	0.00272802	-0.825967	down	-0.825967	0.0243715	0.00239642	-0.907853	down	-0.907853
C5orf24	0.0537263	0.00273202	-0.873557	down	-0.873557	0.182106	0.0646182	-0.542248	down	-0.542248
DDX46	0.0537263	0.00273202	-0.873557	down	-0.873557	0.182106	0.0646182	-0.542248	down	-0.542248
FBXW2	0.0543002	0.00276472	1.4083	up	1.4083	0.949262	0.874203	0.0307087	mixed	0.0307087
FOSB	0.0543326	0.00276988	1.42626	up	1.42626	0.147342	0.0455539	1.0659	up	1.0659
MIR3605	0.0543435	0.00278652	-1.15462	down	-1.15462	0.376015	0.206129	-0.573781	down	-0.573781
PLCG1-AS1	0.0543435	0.00279154	-0.78552	down	-0.78552	0.545385	0.361788	-0.669017	mixed	-0.669017
MIR6871	0.0543435	0.00279154	-0.78552	down	-0.78552	0.545385	0.361788	-0.669017	mixed	-0.669017
LOC107984942	0.0543435	0.00278569	-1.08382	down	-1.08382	0.674502	0.503626	-0.534697	down	-0.534697
LOC124904903	0.0543435	0.00279154	-0.78552	down	-0.78552	0.545385	0.361788	-0.669017	mixed	-0.669017
A3GALT2	0.0543435	0.00278652	-1.15462	down	-1.15462	0.376015	0.206129	-0.573781	down	-0.573781
PHC2	0.0543435	0.00278652	-1.15462	down	-1.15462	0.376015	0.206129	-0.573781	down	-0.573781
PLCG1	0.0543435	0.00279154	-0.78552	down	-0.78552	0.545385	0.361788	-0.669017	mixed	-0.669017
LITATS1	0.0543435	0.00278569	-1.08382	down	-1.08382	0.674502	0.503626	-0.534697	down	-0.534697
PSMG3-AS1	0.0545011	0.00280315	0.836932	up	0.836932	0.961623	0.892994	-0.139701	mixed	-0.139701
ANKRD23	0.0545274	0.00280804	-1.35108	down	-1.35108	0.113111	0.0294756	0.912266	up	0.912266
ANKRD39	0.0545274	0.00280804	-1.35108	down	-1.35108	0.113111	0.0294756	0.912266	up	0.912266
SEMA4C	0.0545274	0.00280804	-1.35108	down	-1.35108	0.113111	0.0294756	0.912266	up	0.912266
ADIRF-AS1	0.0545867	0.00281815	1.84642	up	1.84642	0.187847	0.0677748	0.764287	up	0.764287
MMRN2	0.0545867	0.00281815	1.84642	up	1.84642	0.187847	0.0677748	0.764287	up	0.764287
ARF4-AS1	0.0547534	0.00283477	-0.955429	down	-0.955429	0.762324	0.609938	-0.418081	down	-0.418081
PDE12	0.0547534	0.00283477	-0.955429	down	-0.955429	0.762324	0.609938	-0.418081	down	-0.418081
CTNNBIP1	0.0547534	0.00283739	-1.39097	down	-1.39097	0.0654823	0.0118554	-0.97953	down	-0.97953
ATP6V1E2	0.0547534	0.00283568	1.47713	up	1.47713	0.306497	0.148305	0.780561	up	0.780561
CDC27	0.0550882	0.0028583	-1.40213	down	-1.40213	0.282435	0.129582	0.539501	up	0.539501
PRR35	0.0552414	0.00286982	1.15827	up	1.15827	0.0200073	0.00176253	1.52974	up	1.52974
NHLRC4	0.0552414	0.00286982	1.15827	up	1.15827	0.0200073	0.00176253	1.52974	up	1.52974
PIGQ	0.0552414	0.00286982	1.15827	up	1.15827	0.0200073	0.00176253	1.52974	up	1.52974
MIR6756	0.0552578	0.00288498	1.16084	up	1.16084	0.00472814	0.000172126	1.10502	up	1.10502
LOC124904890	0.0552578	0.00288317	0.937589	up	0.937589	0.177971	0.0620905	0.933714	up	0.933714
FBXL13	0.0552578	0.00288432	-0.912847	down	-0.912847	0.302685	0.145362	-0.604551	down	-0.604551
MCAM	0.0552578	0.00288498	1.16084	up	1.16084	0.00472814	0.000172126	1.10502	up	1.10502
CEP85	0.0552578	0.00288053	-0.978231	down	-0.978231	0.057661	0.00969006	-0.962363	down	-0.962363
SH3BGRL3	0.0552578	0.00288053	-0.978231	down	-0.978231	0.057661	0.00969006	-0.962363	down	-0.962363
STAT4-AS1	0.0555808	0.00290559	-1.19305	down	-1.19305	0.0190567	0.00163434	-1.28731	down	-1.28731
LOC105378448	0.0555808	0.00291263	1.13796	up	1.13796	0.687856	0.518098	-0.407697	down	-0.407697
FRAT2	0.0555808	0.00291263	1.13796	up	1.13796	0.687856	0.518098	-0.407697	down	-0.407697
PCNX4-DT	0.0557149	0.00292325	-0.73508	down	-0.73508	3.72567e-05	1.30319e-07	-0.948002	down	-0.948002
MIR548O2	0.0558637	0.00293606	-0.737945	down	-0.737945	0.00967767	0.000524693	-0.99868	down	-0.99868
LOC105371910	0.0558637	0.00293979	1.25964	up	1.25964	0.255944	0.110232	-0.60243	mixed	-0.60243
HEXIM2	0.0558637	0.0029522	0.853589	up	0.853589	0.00825002	0.000404538	0.988669	up	0.988669
LOC124902654	0.0558637	0.00295636	1.04856	up	1.04856	0.347516	0.181772	-0.56725	down	-0.56725
ADIG	0.0558637	0.00293606	-0.737945	down	-0.737945	0.00967767	0.000524693	-0.99868	down	-0.99868
METTL15	0.0558637	0.00295636	1.04856	up	1.04856	0.347516	0.181772	-0.56725	down	-0.56725
AHCYL2	0.0558637	0.00294309	-0.960553	down	-0.960553	0.372149	0.202885	-0.632673	down	-0.632673
LOC374443	0.0558637	0.00295635	1.27833	up	1.27833	0.104257	0.0258224	-0.687764	down	-0.687764
LOC408186	0.0558637	0.00295635	1.27833	up	1.27833	0.104257	0.0258224	-0.687764	down	-0.687764
RALGAPB	0.0558637	0.00293606	-0.737945	down	-0.737945	0.00967767	0.000524693	-0.99868	down	-0.99868
KIF18A	0.0558637	0.00295636	1.04856	up	1.04856	0.347516	0.181772	-0.56725	down	-0.56725
LOXL1	0.0559489	0.00296449	1.11166	up	1.11166	0.996053	0.987214	-0.00387388	mixed	-0.00387388
KRT8	0.0560933	0.00298019	1.36966	up	1.36966	0.0592225	0.0100891	0.988098	up	0.988098
HAUS6	0.0560933	0.00297816	-0.897591	down	-0.897591	0.209455	0.0805773	-0.425707	down	-0.425707
SNRPB	0.0560933	0.00298303	-0.69449	down	-0.69449	0.186069	0.066615	-0.715973	down	-0.715973
SCARNA8	0.0560933	0.00297816	-0.897591	down	-0.897591	0.209455	0.0805773	-0.425707	down	-0.425707
ZNF343	0.0560933	0.00298303	-0.69449	down	-0.69449	0.186069	0.066615	-0.715973	down	-0.715973
NUDCD3	0.0561237	0.00298828	-1.00043	down	-1.00043	0.117012	0.031091	0.965164	up	0.965164
HYI-AS1	0.0563039	0.00300151	-0.837748	down	-0.837748	0.391138	0.219309	0.615291	up	0.615291
MIR6735	0.0563039	0.00300151	-0.837748	down	-0.837748	0.391138	0.219309	0.615291	up	0.615291
MED8-AS1	0.0563039	0.00300151	-0.837748	down	-0.837748	0.391138	0.219309	0.615291	up	0.615291
SZT2	0.0563039	0.00300151	-0.837748	down	-0.837748	0.391138	0.219309	0.615291	up	0.615291
NSUN2	0.0570038	0.0030462	-0.782697	down	-0.782697	0.134056	0.0393711	-0.52716	down	-0.52716
SRD5A1	0.0570038	0.0030462	-0.782697	down	-0.782697	0.134056	0.0393711	-0.52716	down	-0.52716
KIF4A	0.0571541	0.00306462	-0.848222	down	-0.848222	0.038081	0.00491325	-0.760707	down	-0.760707
PDZD11	0.0571541	0.00306462	-0.848222	down	-0.848222	0.038081	0.00491325	-0.760707	down	-0.760707
GDPD2	0.0571541	0.00306462	-0.848222	down	-0.848222	0.038081	0.00491325	-0.760707	down	-0.760707
CSGALNACT2	0.0571541	0.00306533	-1.03525	down	-1.03525	0.0949187	0.022143	-0.968267	down	-0.968267
LUC7L	0.0573597	0.00308006	-0.838014	down	-0.838014	0.384691	0.213401	-0.461996	down	-0.461996
VSX1	0.05736	0.00308379	-1.05451	down	-1.05451
TMCC2	0.0576449	0.00310284	-1.16701	down	-1.16701	0.0204375	0.00181102	-0.906923	down	-0.906923
VOPP1	0.0576995	0.00310951	-1.00081	down	-1.00081	0.100634	0.0242492	-0.684858	down	-0.684858
EHF	0.0580213	0.00313061	-1.2715	down	-1.2715
AKAP6	0.0582067	0.00314438	-1.16691	down	-1.16691	0.0404652	0.00537072	-0.993691	down	-0.993691
MZF1-AS1	0.0584313	0.00316029	1.09352	up	1.09352	0.300707	0.143867	-0.984899	down	-0.984899
CENPBD2P	0.0584313	0.00316029	1.09352	up	1.09352	0.300707	0.143867	-0.984899	down	-0.984899
KCMF1	0.0586695	0.00317697	1.64614	up	1.64614	0.0219056	0.00203205	0.998478	up	0.998478
LOC105370616	0.0588512	0.00319061	-1.17454	down	-1.17454	0.0928503	0.0213271	-0.801399	down	-0.801399
FOXN3	0.0588512	0.00319061	-1.17454	down	-1.17454	0.055195	0.00895737	-0.801399	down	-0.801399
LOC124903357	0.0588512	0.00319061	-1.17454	down	-1.17454	0.0928503	0.0213271	-0.801399	down	-0.801399
EFCAB11	0.0588512	0.00319061	-1.17454	down	-1.17454	0.055195	0.00895737	-0.801399	down	-0.801399
MAST4	0.0588814	0.00319606	1.41549	up	1.41549	0.110723	0.0283585	-0.909499	down	-0.909499
SLC66A1	0.0591701	0.00321938	-1.2452	down	-1.2452	0.0873071	0.0191716	-0.923765	down	-0.923765
AKR7A2	0.0591701	0.00321938	-1.2452	down	-1.2452	0.0873071	0.0191716	-0.923765	down	-0.923765
KBTBD12	0.0592174	0.00322962	1.19688	up	1.19688
TMCO4	0.0592174	0.00322876	1.03685	up	1.03685	0.906992	0.807292	-0.19086	mixed	-0.19086
VSIG2	0.0592868	0.00323724	1.14938	up	1.14938	0.806035	0.664178	0.154453	up	0.154453
ESAM	0.0592868	0.00323724	1.14938	up	1.14938	0.806035	0.664178	0.154453	up	0.154453
MIR6769A	0.0593849	0.00325029	1.14948	up	1.14948	0.402659	0.229107	-0.559036	mixed	-0.559036
MGRN1	0.0593849	0.00325029	1.14948	up	1.14948	0.402659	0.229107	-0.559036	mixed	-0.559036
NUDT16L1	0.0593849	0.00325029	1.14948	up	1.14948	0.402659	0.229107	-0.559036	mixed	-0.559036
KMT5C	0.0593849	0.00324684	1.03417	up	1.03417	0.539239	0.35586	0.744727	up	0.744727
MIR4750	0.0596583	0.00327883	1.09916	up	1.09916	0.0382136	0.00494317	0.827044	up	0.827044
LOC124902947	0.0596583	0.00328455	1.44106	up	1.44106	0.608927	0.431353	0.345341	up	0.345341
GLI1	0.0596583	0.00328455	1.44106	up	1.44106	0.519628	0.336994	0.345341	up	0.345341
HAPSTR1	0.0596583	0.00327502	1.18246	up	1.18246	0.0491858	0.00740726	0.931766	up	0.931766
TBC1D17	0.0596583	0.00327883	1.09916	up	1.09916	0.0382136	0.00494317	0.827044	up	0.827044
INHBE	0.0596583	0.00328455	1.44106	up	1.44106	0.519628	0.336994	0.345341	up	0.345341
BUB3	0.0596583	0.00327818	-0.898536	down	-0.898536	0.0419861	0.00568137	-0.994461	down	-0.994461
TFAP2A-AS1	0.0597985	0.00329613	1.30089	up	1.30089	0.113711	0.0296909	1.26318	up	1.26318
TFAP2A-AS2	0.0597985	0.00329613	1.30089	up	1.30089	0.113711	0.0296909	1.26318	up	1.26318
FHIP2A	0.0604098	0.00333764	0.908968	up	0.908968	0.14892	0.0465241	0.517845	up	0.517845
KLF10	0.0604098	0.0033347	-1.34222	down	-1.34222	0.574936	0.394128	0.485295	mixed	0.485295
CRAT	0.0604574	0.00334419	1.64684	up	1.64684	0.374744	0.205117	0.772566	up	0.772566
FAM199X	0.0606924	0.00336111	-1.26383	down	-1.26383	0.0193877	0.00168032	-0.985556	down	-0.985556
UXT-AS1	0.0607327	0.0033712	-1.21138	down	-1.21138
ELK1	0.0607327	0.0033712	-1.21138	down	-1.21138	0.200097	0.0750461	-0.780653	down	-0.780653
UXT	0.0607327	0.0033712	-1.21138	down	-1.21138	0.200097	0.0750461	-0.780653	down	-0.780653
CNNM3	0.061055	0.00339304	-1.35108	down	-1.35108	0.992905	0.970785	-0.0102771	mixed	-0.0102771
ACTB	0.0618894	0.00344342	1.35336	up	1.35336	0.0890727	0.0197497	1.08057	up	1.08057
GNA14-AS1	0.0622183	0.00347782	-1.074	down	-1.074
LSP1P5	0.0622183	0.00347688	-1.01448	down	-1.01448
COL23A1	0.0622183	0.00346701	-1.04118	down	-1.04118	0.103396	0.0254438	0.911144	up	0.911144
GNA14	0.0622183	0.00347782	-1.074	down	-1.074
CDKN1B	0.0624263	0.00349717	1.37246	up	1.37246	0.118869	0.0319696	-0.798256	down	-0.798256
UPK2	0.0624263	0.00349752	1.45542	up	1.45542	0.03551	0.00437952	1.31123	up	1.31123
LOC100335030	0.0628574	0.00352574	-0.977112	down	-0.977112	0.0948171	0.022043	-0.741557	down	-0.741557
SPATS2	0.0628574	0.00352574	-0.977112	down	-0.977112	0.0948171	0.022043	-0.741557	down	-0.741557
NUDT15	0.0628826	0.00353122	-1.07575	down	-1.07575	0.0182261	0.00152086	-0.888552	down	-0.888552
LOC100996660	0.0628938	0.00354304	-1.0514	down	-1.0514	0.000963874	1.44225e-05	-0.916706	down	-0.916706
NXT1-AS1	0.0628938	0.00354678	0.760012	up	0.760012	0.093142	0.0214363	-0.898764	down	-0.898764
CIMIP3	0.0628938	0.00356484	-0.982262	down	-0.982262	0.0799677	0.0165817	-0.850952	down	-0.850952
GUCA1ANB-GUCA1A	0.0628938	0.00356484	-0.982262	down	-0.982262	0.0799677	0.0165817	-0.850952	down	-0.850952
NXT1	0.0628938	0.00354678	0.760012	up	0.760012	0.093142	0.0214363	-0.898764	down	-0.898764
GUCA1A	0.0628938	0.00356484	-0.982262	down	-0.982262	0.0799677	0.0165817	-0.850952	down	-0.850952
IDH3B	0.0628938	0.00356546	-0.901457	down	-0.901457	0.144236	0.0440892	-0.744651	down	-0.744651
MYLK	0.0628938	0.00356847	1.31966	up	1.31966	0.0105217	0.000597714	-1.39806	down	-1.39806
MIOX	0.0628938	0.00355485	1.55657	up	1.55657	0.0130626	0.000846982	1.4561	up	1.4561
ADM2	0.0628938	0.00355485	1.55657	up	1.55657	0.0130626	0.000846982	1.4561	up	1.4561
CAPN2	0.0628938	0.00355527	1.70587	up	1.70587	0.289268	0.134984	-0.975771	down	-0.975771
LOC124903189	0.0629547	0.00358044	-0.886126	down	-0.886126	0.00220603	5.0871e-05	-1.23719	down	-1.23719
GPC5	0.0629547	0.00358044	-0.886126	down	-0.886126	0.00330203	9.41114e-05	-1.23719	down	-1.23719
KDM4B	0.0629547	0.00358415	1.0947	up	1.0947	0.171768	0.0588184	1.10454	up	1.10454
MIR17	0.0629547	0.00358044	-0.886126	down	-0.886126	0.00220603	5.0871e-05	-1.23719	down	-1.23719
MIR18A	0.0629547	0.00358044	-0.886126	down	-0.886126	0.00220603	5.0871e-05	-1.23719	down	-1.23719
MIR19A	0.0629547	0.00358044	-0.886126	down	-0.886126	0.00220603	5.0871e-05	-1.23719	down	-1.23719
MIR19B1	0.0629547	0.00358044	-0.886126	down	-0.886126	0.00220603	5.0871e-05	-1.23719	down	-1.23719
MIR20A	0.0629547	0.00358044	-0.886126	down	-0.886126	0.00220603	5.0871e-05	-1.23719	down	-1.23719
MIR92A1	0.0629547	0.00358044	-0.886126	down	-0.886126	0.00220603	5.0871e-05	-1.23719	down	-1.23719
MIR17HG	0.0629547	0.00358044	-0.886126	down	-0.886126	0.00220603	5.0871e-05	-1.23719	down	-1.23719
MIR7855	0.0631773	0.00361317	1.49457	up	1.49457	0.0457538	0.00649646	-1.22774	down	-1.22774
CHD3	0.0631773	0.00361192	1.49466	up	1.49466	0.0359064	0.00445359	1.45176	up	1.45176
LIPH	0.0631773	0.00361306	1.27906	up	1.27906	0.0595337	0.010148	-1.1268	down	-1.1268
PROS1	0.0631773	0.0036042	-1.10791	down	-1.10791	0.186522	0.066875	-0.699432	down	-0.699432
SPTB	0.0631773	0.00361317	1.49457	up	1.49457	0.0457538	0.00649646	-1.22774	down	-1.22774
SCARNA21	0.0631773	0.00361192	1.49466	up	1.49466	0.0359064	0.00445359	1.45176	up	1.45176
ASMER1	0.0632786	0.00363533	1.69999	up	1.69999	0.993185	0.972847	-0.29155	mixed	-0.29155
ZNF507	0.0632786	0.0036339	1.2591	up	1.2591	0.197958	0.0739441	0.44415	up	0.44415
TNRC6A	0.0632786	0.00362736	1.02238	up	1.02238	0.762287	0.609724	0.207943	mixed	0.207943
LYN	0.0632786	0.00362439	1.49153	up	1.49153	0.992926	0.970986	0.00880523	mixed	0.00880523
NRIP1	0.0632786	0.00363533	1.69999	up	1.69999	0.993185	0.972847	-0.29155	mixed	-0.29155
DIP2A-IT1	0.0633476	0.0036475	-1.03839	down	-1.03839	0.136497	0.0407244	-0.502645	down	-0.502645
LOC124905046	0.0633476	0.0036475	-1.03839	down	-1.03839	0.136497	0.0407244	-0.502645	down	-0.502645
DIP2A	0.0633476	0.0036475	-1.03839	down	-1.03839	0.136497	0.0407244	-0.502645	down	-0.502645
AGO3	0.0635564	0.00366363	-1.09608	down	-1.09608	0.0899339	0.0201201	-0.653214	down	-0.653214
AGO1	0.0635564	0.00366363	-1.09608	down	-1.09608	0.0899339	0.0201201	-0.653214	down	-0.653214
LOC124902767	0.0636615	0.00367793	1.19311	up	1.19311
CXCR5	0.0636615	0.00367793	1.19311	up	1.19311
FOLR2	0.0636778	0.00368711	-0.959241	down	-0.959241	0.0269113	0.00283616	0.858144	up	0.858144
LRIG1	0.0636778	0.00368558	-1.14122	down	-1.14122	0.228822	0.0925486	0.90157	up	0.90157
INPPL1	0.0636778	0.00368711	-0.959241	down	-0.959241	0.0269113	0.00283616	0.858144	up	0.858144
SPATA46	0.064087	0.00371909	1.17948	up	1.17948
C1orf226	0.064087	0.00371909	1.17948	up	1.17948	0.0236305	0.00228693	-1.05024	down	-1.05024
NOS1AP	0.064087	0.00371909	1.17948	up	1.17948	0.0236305	0.00228693	-1.05024	down	-1.05024
MIR1276	0.0645628	0.00375088	-0.812423	down	-0.812423	0.00431558	0.000147599	-1.07267	down	-1.07267
KLHL25	0.0645628	0.00375088	-0.812423	down	-0.812423	0.00431558	0.000147599	-1.07267	down	-1.07267
PARP1	0.0647773	0.00376754	-1.08658	down	-1.08658	0.0424043	0.00575011	-0.92587	down	-0.92587
FANCG	0.06511	0.00379531	-0.691581	down	-0.691581	0.0535727	0.00849501	-0.801485	down	-0.801485
GLRB	0.06511	0.00379491	-1.19304	down	-1.19304	0.99551	0.982742	0.145142	mixed	0.145142
VCP	0.06511	0.00379531	-0.691581	down	-0.691581	0.0535727	0.00849501	-0.801485	down	-0.801485
SP1	0.0653637	0.00381433	1.44884	up	1.44884	0.873758	0.756374	-0.539145	down	-0.539145
EGFR	0.0655325	0.00382842	1.57035	up	1.57035	0.000239671	1.66115e-06	-2.07105	down	-2.07105
STT3A-AS1	0.0656019	0.00383672	-0.74401	down	-0.74401	0.308422	0.149761	0.617667	mixed	0.617667
FEZ1	0.0656019	0.00383672	-0.74401	down	-0.74401	0.308422	0.149761	0.617667	mixed	0.617667
PRKG1-AS1	0.0657066	0.00386409	1.35887	up	1.35887	0.986104	0.955897	-0.018097	mixed	-0.018097
SNORA22B	0.0657066	0.00384906	-0.718993	down	-0.718993	0.118536	0.0317034	0.849986	up	0.849986
BAZ2A	0.0657066	0.00386338	1.58922	up	1.58922	0.123153	0.0339831	0.769733	up	0.769733
LOC124902425	0.0657066	0.00386409	1.35887	up	1.35887	0.986104	0.955897	-0.018097	mixed	-0.018097
DKK1	0.0657066	0.00386409	1.35887	up	1.35887	0.986104	0.955897	-0.018097	mixed	-0.018097
NCS1	0.0657066	0.0038557	-1.34915	down	-1.34915	0.000301265	2.45883e-06	-1.99959	down	-1.99959
SUMF2	0.0657066	0.00384906	-0.718993	down	-0.718993	0.192229	0.0703022	0.575542	up	0.575542
ATP5F1B	0.0657066	0.00386338	1.58922	up	1.58922	0.123153	0.0339831	0.769733	up	0.769733
SNORA15	0.0657066	0.00384906	-0.718993	down	-0.718993	0.192229	0.0703022	0.575542	up	0.575542
CCT6A	0.0657066	0.00384906	-0.718993	down	-0.718993	0.118536	0.0317034	0.849986	up	0.849986
EFCAB6-DT	0.065814	0.00388318	-1.17622	down	-1.17622	0.0703948	0.0132281	-0.850073	down	-0.850073
LOC105375724	0.065814	0.00388072	0.917479	up	0.917479
EFCAB6	0.065814	0.00388318	-1.17622	down	-1.17622	0.073504	0.0142456	-0.850073	down	-0.850073
NOD1	0.0658646	0.00389043	0.975751	up	0.975751	0.647697	0.47262	-0.352597	down	-0.352597
HNRNPA0	0.0663026	0.00392059	1.1253	up	1.1253	0.00533542	0.000202523	-1.10824	down	-1.10824
HOXA10-HOXA9	0.066366	0.00395095	0.983535	up	0.983535	0.169025	0.0573162	0.864468	up	0.864468
LINC01151	0.066366	0.00393749	-1.21979	down	-1.21979
SEC23B	0.066366	0.00394027	-0.757218	down	-0.757218	0.343725	0.17896	0.591856	mixed	0.591856
LOC105369149	0.066366	0.00395869	1.08164	up	1.08164	0.975656	0.929121	-0.0303889	mixed	-0.0303889
LOC107986972	0.066366	0.00393749	-1.21979	down	-1.21979
SBF2-AS1	0.066366	0.00395869	1.08164	up	1.08164	0.975656	0.929121	-0.0303889	mixed	-0.0303889
HOXA9	0.066366	0.00395095	0.983535	up	0.983535	0.169025	0.0573162	0.864468	up	0.864468
HOXA10	0.066366	0.00395095	0.983535	up	0.983535	0.169025	0.0573162	0.864468	up	0.864468
HOXA11	0.066366	0.00395095	0.983535	up	0.983535	0.178757	0.0625268	0.864468	up	0.864468
LINC02709	0.066366	0.00395869	1.08164	up	1.08164	0.975656	0.929121	-0.0303889	mixed	-0.0303889
MIR196B	0.066366	0.00395095	0.983535	up	0.983535	0.169025	0.0573162	0.864468	up	0.864468
PRMT7	0.066366	0.00394163	-0.965252	down	-0.965252	0.186912	0.0670744	-0.539331	down	-0.539331
SLC7A6OS	0.066366	0.00394163	-0.965252	down	-0.965252	0.168681	0.0571375	-0.539331	down	-0.539331
GGACT	0.0666796	0.00398171	-1.25076	down	-1.25076	0.00033275	3.0391e-06	-1.89193	down	-1.89193
RARA	0.0670929	0.00401073	1.15463	up	1.15463	0.963487	0.897551	0.0320563	mixed	0.0320563
SOSTDC1	0.0671372	0.00402154	0.925057	up	0.925057	0.0246118	0.00243029	-0.820637	down	-0.820637
BCAS3	0.0671372	0.00402206	-0.895399	down	-0.895399	0.0899475	0.0201314	0.723796	up	0.723796
CRPPA	0.0671372	0.00402154	0.925057	up	0.925057	0.0246118	0.00243029	-0.820637	down	-0.820637
ZNF622	0.0672705	0.0040344	-0.915563	down	-0.915563	0.554585	0.371807	-0.410116	down	-0.410116
RAD50	0.0678667	0.00407455	0.961504	up	0.961504	0.0530703	0.00837035	-1.21231	down	-1.21231
CARINH	0.0678667	0.00407455	0.961504	up	0.961504	0.0530703	0.00837035	-1.21231	down	-1.21231
HNRNPLL	0.0681598	0.00409655	0.716441	up	0.716441	0.180179	0.0635423	0.882937	up	0.882937
SUB1	0.0681945	0.00410747	-0.771445	down	-0.771445	0.01129	0.000668446	-0.674509	down	-0.674509
PLXNB2	0.0681945	0.00410307	1.49883	up	1.49883	0.115643	0.0304875	1.06029	up	1.06029
DENND6B	0.0681945	0.00410307	1.49883	up	1.49883	0.115643	0.0304875	1.06029	up	1.06029
FAM111A-DT	0.0682764	0.00412565	-1.30447	down	-1.30447	0.0948171	0.0220506	-0.949779	down	-0.949779
FAM111A	0.0682764	0.00412565	-1.30447	down	-1.30447	0.0948171	0.0220506	-0.949779	down	-0.949779
ZNF414	0.0682764	0.00411996	1.01612	up	1.01612	0.420394	0.24508	-0.565543	down	-0.565543
USP40	0.0685591	0.00414717	1.31833	up	1.31833	0.887869	0.778221	0.418788	up	0.418788
TGIF2-RAB5IF	0.0686467	0.0041918	-1.29082	down	-1.29082	0.329705	0.167394	0.716596	up	0.716596
HOXA10-HOXA9	0.0686467	0.00417773	1.2794	up	1.2794	0.169025	0.0573162	0.864468	up	0.864468
MIR6732	0.0686467	0.00417853	-1.08382	down	-1.08382	0.548127	0.364779	0.315928	up	0.315928
LOC105378626	0.0686467	0.00419319	1.46505	up	1.46505	0.372642	0.203362	0.858638	up	0.858638
LOC124903917	0.0686467	0.00419319	1.46505	up	1.46505	0.372642	0.203362	0.858638	up	0.858638
LDC1P	0.0686467	0.00419319	1.46505	up	1.46505	0.372642	0.203362	0.858638	up	0.858638
LINC01226	0.0686467	0.00419319	1.46505	up	1.46505	0.372642	0.203362	0.858638	up	0.858638
HOXA9	0.0686467	0.00417773	1.2794	up	1.2794	0.169025	0.0573162	0.864468	up	0.864468
HOXA10	0.0686467	0.00417773	1.2794	up	1.2794	0.169025	0.0573162	0.864468	up	0.864468
HOXA11	0.0686467	0.00417773	1.2794	up	1.2794	0.178757	0.0625268	0.864468	up	0.864468
RND3	0.0686467	0.00419169	-1.35898	down	-1.35898	0.222457	0.0886341	-0.908396	down	-0.908396
LOC442497	0.0686467	0.00418122	1.20873	up	1.20873	0.255418	0.109923	0.762074	up	0.762074
MIR196B	0.0686467	0.00417773	1.2794	up	1.2794	0.169025	0.0573162	0.864468	up	0.864468
TGIF2	0.0686467	0.0041918	-1.29082	down	-1.29082	0.329705	0.167394	0.716596	up	0.716596
TINAGL1	0.0686467	0.00419319	1.46505	up	1.46505	0.372642	0.203362	0.858638	up	0.858638
ZC3H12A	0.0686467	0.00417853	-1.08382	down	-1.08382	0.548127	0.364779	0.315928	up	0.315928
LAS1L	0.0686467	0.00419688	-0.898021	down	-0.898021	0.0569277	0.00949901	-0.670574	down	-0.670574
LINC01220	0.0688259	0.00421229	1.23855	up	1.23855	0.387747	0.216114	0.812344	up	0.812344
CYP46A1	0.0696236	0.00427012	1.16939	up	1.16939	0.954478	0.881399	-0.0529478	down	-0.0529478
GPN1	0.0696236	0.00426835	-1.11527	down	-1.11527	0.0112002	0.000660199	-0.951945	down	-0.951945
SPATA31H1	0.0696236	0.00426835	-1.11527	down	-1.11527	0.0113242	0.000675773	-1.11586	down	-1.11586
ZNF512	0.0696236	0.00426835	-1.11527	down	-1.11527	0.0112002	0.000660199	-0.951945	down	-0.951945
SCLT1	0.0696486	0.00428066	-1.15219	down	-1.15219	0.281239	0.128778	-0.830481	down	-0.830481
C4orf33	0.0696486	0.00428066	-1.15219	down	-1.15219	0.281239	0.128778	-0.830481	down	-0.830481
SLC9A8	0.06981	0.0042951	1.19931	up	1.19931	0.896877	0.792015	-0.0923744	down	-0.0923744
TMEM38B	0.0698986	0.00430507	-0.950839	down	-0.950839	1.60437e-05	4.15694e-08	-1.4228	down	-1.4228
MIR3181	0.070005	0.00433264	-1.2176	down	-1.2176	0.000308775	2.68013e-06	-0.93244	down	-0.93244
LOC101926994	0.070005	0.00433462	1.03809	up	1.03809	0.022094	0.00206371	-1.26771	down	-1.26771
SEPTIN7-DT	0.070005	0.00435239	1.57057	up	1.57057	0.0161844	0.00124534	0.854732	up	0.854732
CYLD-AS1	0.070005	0.00433264	-1.2176	down	-1.2176	0.00036535	3.57351e-06	-0.93244	down	-0.93244
DYRK3-AS1	0.070005	0.00434042	-1.04277	down	-1.04277	0.136422	0.0406704	-0.675221	down	-0.675221
LINC02786	0.070005	0.00433672	-0.91659	down	-0.91659
LOC124903558	0.070005	0.00433462	1.03809	up	1.03809	0.022094	0.00206371	-1.26771	down	-1.26771
CYLD	0.070005	0.00433264	-1.2176	down	-1.2176	0.000308775	2.68013e-06	-0.93244	down	-0.93244
FAM174B	0.070005	0.00433462	1.03809	up	1.03809	0.022094	0.00206371	-1.26771	down	-1.26771
EIF3B	0.070005	0.00434822	0.798078	up	0.798078	0.838004	0.705556	-0.324819	mixed	-0.324819
SEPTIN7	0.070005	0.00435239	1.57057	up	1.57057	0.0161844	0.00124534	0.854732	up	0.854732
LOC124902280	0.0706546	0.00440654	-0.885572	down	-0.885572	0.620947	0.444033	-0.263873	mixed	-0.263873
EEIG1	0.0706546	0.00440654	-0.885572	down	-0.885572	0.0737336	0.0143809	-1.05913	mixed	-1.05913
BICD1	0.0706546	0.00440262	-1.17393	down	-1.17393	0.108354	0.027474	1.18801	up	1.18801
ATOH8	0.0706546	0.00441106	-1.15022	down	-1.15022
DPM2	0.0706546	0.00440654	-0.885572	down	-0.885572	0.0737336	0.0143809	-1.05913	mixed	-1.05913
TEKT3	0.0707679	0.00442271	-1.04472	down	-1.04472
DGKG	0.0712312	0.00446088	-0.905845	down	-0.905845	0.00815258	0.000393951	-1.07499	down	-1.07499
ETV5	0.0712312	0.00446088	-0.905845	down	-0.905845	0.00815258	0.000393951	-1.07499	down	-1.07499
UBC	0.0712312	0.0044567	1.03468	up	1.03468	0.0260149	0.00267428	0.920541	up	0.920541
MIR4512	0.0717724	0.00452415	1.26152	up	1.26152	0.242328	0.101233	-0.972363	down	-0.972363
SNAPC5	0.0717724	0.00452415	1.26152	up	1.26152	0.242328	0.101233	-0.972363	down	-0.972363
KLHL41	0.0717724	0.00452727	-0.994684	down	-0.994684	0.382558	0.211624	-0.599137	down	-0.599137
BBS5	0.0717724	0.00452727	-0.994684	down	-0.994684	0.382558	0.211624	-0.599137	down	-0.599137
ZWILCH	0.0717724	0.00452415	1.26152	up	1.26152	0.242328	0.101233	-0.972363	down	-0.972363
CAND1	0.0717724	0.00452248	1.38107	up	1.38107	0.86909	0.749293	-0.299302	mixed	-0.299302
SNORD16	0.0717724	0.00452415	1.26152	up	1.26152	0.144554	0.0442896	-0.972363	down	-0.972363
SNORD18A	0.0717724	0.00452415	1.26152	up	1.26152	0.144554	0.0442896	-0.972363	down	-0.972363
SNORD18B	0.0717724	0.00452415	1.26152	up	1.26152	0.144554	0.0442896	-0.972363	down	-0.972363
SNORD18C	0.0717724	0.00452415	1.26152	up	1.26152	0.144554	0.0442896	-0.972363	down	-0.972363
RPL4	0.0717724	0.00452415	1.26152	up	1.26152	0.144554	0.0442896	-0.972363	down	-0.972363
DLGAP1	0.0717724	0.00452131	1.702	up	1.702	0.0237238	0.00230199	-1.36691	down	-1.36691
IFI30	0.0718644	0.00453773	-1.32767	down	-1.32767	0.151285	0.0478805	-1.03568	mixed	-1.03568
MAST3	0.0718644	0.00453773	-1.32767	down	-1.32767	0.151285	0.0478805	-1.03568	mixed	-1.03568
PIK3R2	0.0718644	0.00453773	-1.32767	down	-1.32767	0.151285	0.0478805	-1.03568	mixed	-1.03568
HTRA4	0.0718854	0.00454371	1.61502	up	1.61502	0.192196	0.0702652	-1.02273	down	-1.02273
PLEKHA2	0.0718854	0.00454371	1.61502	up	1.61502	0.192196	0.0702652	-1.02273	down	-1.02273
LINC00682	0.072061	0.00456413	-1.19283	down	-1.19283	0.172046	0.0589867	-0.952308	down	-0.952308
LOC105374426	0.072061	0.00456413	-1.19283	down	-1.19283	0.172046	0.0589867	-0.952308	down	-0.952308
LOC124900696	0.072061	0.00456413	-1.19283	down	-1.19283	0.172046	0.0589867	-0.952308	down	-0.952308
TMEM33	0.072061	0.00456413	-1.19283	down	-1.19283	0.172046	0.0589867	-0.952308	down	-0.952308
RBFADN	0.0721462	0.00457886	-1.29246	down	-1.29246	0.0281423	0.00305673	-0.94585	down	-0.94585
RBFA	0.0721462	0.00457886	-1.29246	down	-1.29246	0.0281423	0.00305673	-0.94585	down	-0.94585
TMEM92	0.0721773	0.0045855	1.3805	up	1.3805	0.0349301	0.00425893	0.976926	up	0.976926
SRR	0.0721964	0.00459139	1.14963	up	1.14963	0.583308	0.401907	0.261495	up	0.261495
MITF	0.072522	0.00461679	-1.0962	down	-1.0962	0.0723259	0.0138704	-0.772763	down	-0.772763
UBE2S	0.0725641	0.00462416	-1.14899	down	-1.14899	0.00538863	0.000208134	-0.981031	down	-0.981031
MYL4	0.0729707	0.00465479	-1.06131	down	-1.06131
FNBP1	0.0730969	0.00466757	-0.82213	mixed	-0.82213	0.60213	0.424042	0.577108	up	0.577108
CAMK2B	0.0733672	0.00468958	-1.24411	down	-1.24411	0.00129663	2.22572e-05	-1.24623	down	-1.24623
GABARAPL1	0.0734118	0.00469718	1.12252	up	1.12252	0.250557	0.106647	-0.447282	down	-0.447282
KLRD1	0.0734118	0.00469718	1.12252	up	1.12252	0.250557	0.106647	-0.447282	down	-0.447282
LOC100128966	0.0739215	0.00474892	0.841065	up	0.841065	0.00427396	0.00014538	-0.800957	down	-0.800957
ORC3	0.0739215	0.0047486	-0.614239	down	-0.614239	0.000350143	3.32567e-06	-0.905684	down	-0.905684
FAM53C	0.0739215	0.00474892	0.841065	up	0.841065	0.00427396	0.00014538	-0.800957	down	-0.800957
KDM3B	0.0739215	0.00474892	0.841065	up	0.841065	0.00839335	0.000415372	-0.800957	down	-0.800957
RARS2	0.0739215	0.0047486	-0.614239	down	-0.614239	0.000350143	3.32567e-06	-0.905684	down	-0.905684
CDC25C	0.0739215	0.00474892	0.841065	up	0.841065	0.00839335	0.000415372	-0.800957	down	-0.800957
BLOC1S5-TXNDC5	0.0739598	0.00475617	-1.01103	down	-1.01103	0.0909222	0.0205035	-0.802064	down	-0.802064
EEF1E1-BLOC1S5	0.0739598	0.00475617	-1.01103	down	-1.01103	0.0648997	0.0116658	-0.802064	down	-0.802064
BLOC1S5	0.0739598	0.00475617	-1.01103	down	-1.01103	0.0909222	0.0205035	-0.802064	down	-0.802064
TXNDC5	0.0739598	0.00475617	-1.01103	down	-1.01103	0.132036	0.0381107	-0.711521	down	-0.711521
CBLC	0.0740566	0.00476718	1.2704	up	1.2704	0.719436	0.556781	0.18195	mixed	0.18195
ZNF341	0.0740593	0.00477215	0.937589	up	0.937589	0.184571	0.0659711	0.933714	up	0.933714
LOC105376289	0.0742397	0.00479818	1.64684	up	1.64684	0.0150973	0.0010943	1.01221	up	1.01221
IER5L-AS1	0.0742397	0.00479818	1.64684	up	1.64684	0.0150973	0.0010943	1.01221	up	1.01221
CLN6	0.0742397	0.00479597	-0.930041	down	-0.930041	0.936864	0.853725	-0.208477	mixed	-0.208477
PTPA	0.0742397	0.00479818	1.64684	up	1.64684	0.0150973	0.0010943	1.01221	up	1.01221
CALML4	0.0742397	0.00479597	-0.930041	down	-0.930041	0.936864	0.853725	-0.208477	mixed	-0.208477
CBLL1-AS1	0.0742403	0.00482224	-0.993471	down	-0.993471	0.481722	0.300709	-0.573073	down	-0.573073
LOC107986075	0.0742403	0.00482135	1.20679	up	1.20679	0.713713	0.549177	-0.564004	mixed	-0.564004
RPSA	0.0742403	0.00482135	1.20679	up	1.20679	0.713713	0.549177	-0.564004	mixed	-0.564004
SNORA6	0.0742403	0.00482135	1.20679	up	1.20679	0.713713	0.549177	-0.564004	mixed	-0.564004
SNORA62	0.0742403	0.00482135	1.20679	up	1.20679	0.713713	0.549177	-0.564004	mixed	-0.564004
CBLL1	0.0742403	0.00482224	-0.993471	down	-0.993471	0.481722	0.300709	-0.573073	down	-0.573073
COPS3	0.0743689	0.0048354	-0.94636	down	-0.94636	0.18111	0.0641007	-0.686483	down	-0.686483
LINC01358	0.0745457	0.00485654	-1.08926	down	-1.08926
FRMPD2	0.0745457	0.00485449	-1.2154	down	-1.2154
UBXN7-AS1	0.0745881	0.00486584	1.54178	mixed	1.54178	0.595596	0.41669	0.434355	mixed	0.434355
NARF-AS2	0.0745881	0.00486895	-0.882964	down	-0.882964	0.57683	0.395901	-0.471817	mixed	-0.471817
CYBC1	0.0745881	0.00486895	-0.882964	down	-0.882964	0.57683	0.395901	-0.471817	mixed	-0.471817
CEMIP2	0.0746728	0.00488897	1.50419	up	1.50419	0.805595	0.663419	0.247049	mixed	0.247049
CUTALP	0.0746728	0.0048853	-0.898143	down	-0.898143	0.548173	0.36488	-0.447221	down	-0.447221
PSMD5	0.0746728	0.0048853	-0.898143	down	-0.898143	0.548173	0.36488	-0.447221	down	-0.447221
LOC105372672	0.0748	0.00490214	1.18559	up	1.18559	0.238333	0.0987343	0.642352	up	0.642352
LINC01151	0.0749529	0.00492186	-1.21979	down	-1.21979
LOC107986904	0.0749529	0.00492186	-1.21979	down	-1.21979
LOC107986972	0.0749529	0.00492186	-1.21979	down	-1.21979
KDM5A	0.0749529	0.0049201	1.45927	up	1.45927	0.285157	0.131958	0.650908	up	0.650908
UBXN7	0.0749832	0.00493565	-0.93871	mixed	-0.93871	0.641344	0.466136	-0.504648	mixed	-0.504648
PSCA	0.0749832	0.00493841	-1.10955	down	-1.10955	0.209956	0.0809461	1.00802	up	1.00802
JRK	0.0749832	0.00493841	-1.10955	down	-1.10955	0.209956	0.0809461	1.00802	up	1.00802
LINC01023	0.075021	0.00494574	-0.810478	down	-0.810478	0.90539	0.804975	-0.238649	down	-0.238649
MYOCD	0.0750925	0.00495532	-1.19736	down	-1.19736
AHI1-DT	0.0761021	0.00504619	-0.770449	down	-0.770449	0.00665741	0.00028979	-0.847192	down	-0.847192
NKX2-1-AS1	0.0761021	0.00505148	0.986506	up	0.986506	0.983971	0.949298	0.0201882	mixed	0.0201882
SFTA3	0.0761021	0.00505148	0.986506	up	0.986506	0.983971	0.949298	0.0201882	mixed	0.0201882
AHI1	0.0761021	0.00504619	-0.770449	down	-0.770449	0.00665741	0.00028979	-0.847192	down	-0.847192
RNF213	0.0761021	0.00504225	1.14458	up	1.14458	0.0426036	0.00580065	0.727641	up	0.727641
NKX2-1	0.0761021	0.00505148	0.986506	up	0.986506	0.983971	0.949298	0.0201882	mixed	0.0201882
LINC02926	0.0761553	0.00508457	1.42282	up	1.42282	0.569602	0.387962	0.854444	up	0.854444
LOC105372279	0.0761553	0.00508457	1.42282	up	1.42282	0.569602	0.387962	0.854444	up	0.854444
ZNF564	0.0761553	0.00508457	1.42282	up	1.42282	0.569602	0.387962	0.854444	up	0.854444
ZNF709	0.0761553	0.00508457	1.42282	up	1.42282	0.415101	0.24065	0.685621	up	0.685621
KRT7	0.0761553	0.00507007	-1.19228	down	-1.19228	0.151187	0.0478018	-0.698529	down	-0.698529
KRT86	0.0761553	0.00507007	-1.19228	down	-1.19228	0.151187	0.0478018	-0.698529	down	-0.698529
ZNF490	0.0761553	0.00508457	1.42282	up	1.42282	0.569602	0.387962	0.854444	up	0.854444
DYRK3	0.0761553	0.00506382	-1.04277	down	-1.04277	0.136422	0.0406704	-0.675221	down	-0.675221
MAP7	0.0761553	0.00507144	-1.05665	down	-1.05665	0.0764673	0.0152422	1.02397	up	1.02397
MAPKAPK2	0.0761553	0.00506382	-1.04277	down	-1.04277	0.136422	0.0406704	-0.675221	down	-0.675221
ISG15	0.0761553	0.00508257	1.16626	up	1.16626	0.0186694	0.00158299	1.44897	up	1.44897
LOC124902267	0.0762317	0.00509461	1.13031	up	1.13031	0.712725	0.54762	-0.573427	down	-0.573427
PSMB7	0.0762317	0.00509461	1.13031	up	1.13031	0.712725	0.54762	-0.573427	down	-0.573427
RYR3-DT	0.076371	0.00510886	1.2015	up	1.2015
NSMAF	0.0764905	0.0051218	-1.15041	down	-1.15041	0.429827	0.253336	-0.649704	down	-0.649704
LOC105371855	0.0766612	0.00515327	1.052	up	1.052	0.137047	0.0409685	0.792692	up	0.792692
LOC124901485	0.0766612	0.00515916	1.30089	up	1.30089	0.201181	0.0756357	-0.738749	down	-0.738749
GARIN3	0.0766612	0.00517291	-0.889058	down	-0.889058	0.256286	0.110679	-0.426488	down	-0.426488
SENP5	0.0766612	0.00516519	-0.65636	down	-0.65636	0.323456	0.162063	0.56593	up	0.56593
ITK	0.0766612	0.00517291	-0.889058	down	-0.889058	0.256286	0.110679	-0.426488	down	-0.426488
UQCC1	0.0766612	0.00514443	0.862914	up	0.862914	0.42521	0.24954	-0.585166	down	-0.585166
TFAP2A	0.0766612	0.00515916	1.30089	up	1.30089	0.201181	0.0756357	-0.738749	down	-0.738749
CIMIP2B	0.0766612	0.00514254	-0.99805	down	-0.99805
HAVCR2	0.0766612	0.00517291	-0.889058	down	-0.889058	0.256286	0.110679	-0.426488	down	-0.426488
MED7	0.0766612	0.00517291	-0.889058	down	-0.889058	0.256286	0.110679	-0.426488	down	-0.426488
MIR4662A	0.0769923	0.00523141	-0.944118	down	-0.944118	0.0469698	0.00680299	-0.945523	down	-0.945523
MIR4662B	0.0769923	0.00523141	-0.944118	down	-0.944118	0.0469698	0.00680299	-0.945523	down	-0.945523
DLGAP4-AS1	0.0769923	0.00520361	-1.29082	down	-1.29082	0.329705	0.167394	0.716596	up	0.716596
LOC101926994	0.0769923	0.00524717	1.03809	up	1.03809	0.022094	0.00206371	-1.26771	down	-1.26771
LINC01800	0.0769923	0.00525004	1.37039	up	1.37039	0.25497	0.109632	0.639194	up	0.639194
LOC105375743	0.0769923	0.00523141	-0.944118	down	-0.944118	0.0469698	0.00680299	-0.945523	down	-0.945523
LOC124903558	0.0769923	0.00524717	1.03809	up	1.03809	0.022094	0.00206371	-1.26771	down	-1.26771
LINC00964	0.0769923	0.00523141	-0.944118	down	-0.944118	0.0469698	0.00680299	-0.945523	down	-0.945523
SMG6	0.0769923	0.0052473	1.14963	up	1.14963	0.477968	0.297252	-0.924085	down	-0.924085
IL1RN	0.0769923	0.00523341	-1.10723	down	-1.10723
FAM174B	0.0769923	0.00524717	1.03809	up	1.03809	0.022094	0.00206371	-1.26771	down	-1.26771
MIR629	0.0769923	0.00520936	0.937633	up	0.937633	0.990711	0.96599	-0.0536226	mixed	-0.0536226
TLE3	0.0769923	0.00520936	0.937633	up	0.937633	0.990711	0.96599	-0.0536226	mixed	-0.0536226
PGAP4	0.0769923	0.00521601	-1.31575	down	-1.31575	0.00627279	0.000269365	-1.13163	down	-1.13163
TAF1B	0.0769923	0.0052274	-1.21565	down	-1.21565	0.0194564	0.00168943	-0.760747	down	-0.760747
NR1D1	0.0769923	0.00523765	1.29027	up	1.29027	0.0856609	0.0185171	-0.940736	down	-0.940736
FRMD3	0.0771517	0.0052659	1.45687	up	1.45687	0.797529	0.652468	0.602621	up	0.602621
FGD2	0.0772804	0.00527968	1.39296	up	1.39296
MSANTD3-TMEFF1	0.0775374	0.00530226	-1.11457	down	-1.11457	0.994851	0.980474	0.00626458	mixed	0.00626458
CAVIN4	0.0775374	0.00530226	-1.11457	down	-1.11457	0.99552	0.983461	0.00522133	mixed	0.00522133
TMEFF1	0.0775374	0.00530226	-1.11457	down	-1.11457	0.99552	0.983461	0.00522133	mixed	0.00522133
PPP2R5E	0.0775754	0.00530988	-1.34483	down	-1.34483	0.102933	0.0252633	-0.602147	down	-0.602147
C16orf95	0.0776099	0.00535073	-1.06907	down	-1.06907	0.395028	0.222974	0.397684	mixed	0.397684
MIR7156	0.0776099	0.00536005	-0.972173	down	-0.972173
LOC105374764	0.0776099	0.00536935	-1.36028	down	-1.36028	0.959855	0.889659	0.114359	mixed	0.114359
RN7SL832P	0.0776099	0.00536994	-1.06239	down	-1.06239	0.233175	0.0951914	0.936909	up	0.936909
ATPSCKMT	0.0776099	0.00536339	-0.856749	down	-0.856749	0.317288	0.157473	-0.342762	down	-0.342762
GLIS1	0.0776099	0.00534038	-1.13749	down	-1.13749	0.577602	0.396591	0.764462	up	0.764462
CCT5	0.0776099	0.00536339	-0.856749	down	-0.856749	0.317288	0.157473	-0.342762	down	-0.342762
LGALS9	0.0776099	0.00532987	-1.11291	down	-1.11291	0.102779	0.0251873	-0.786985	down	-0.786985
CHST7	0.0776099	0.00537249	-1.18973	down	-1.18973
FBXO31	0.0776099	0.00535073	-1.06907	down	-1.06907	0.395028	0.222974	0.397684	mixed	0.397684
NOL10	0.0776099	0.00536994	-1.06239	down	-1.06239	0.233175	0.0951914	0.936909	up	0.936909
MAP1LC3B	0.0776099	0.00535073	-1.06907	down	-1.06907	0.395028	0.222974	0.397684	mixed	0.397684
ST6GALNAC5	0.0776099	0.00536005	-0.972173	down	-0.972173
KSR1	0.0776099	0.00532987	-1.11291	down	-1.11291	0.102779	0.0251873	-0.786985	down	-0.786985
CCDC126	0.0776099	0.00537175	-1.04658	down	-1.04658	0.30985	0.150846	-0.653845	down	-0.653845
GRIN3B	0.0777367	0.00539133	1.13119	up	1.13119	0.00073127	9.61574e-06	1.06286	up	1.06286
WDR18	0.0777367	0.00539133	1.13119	up	1.13119	0.00073127	9.61574e-06	1.06286	up	1.06286
SMIM5	0.0777367	0.00538669	1.22419	up	1.22419
BICRAL	0.077782	0.00541459	1.25215	up	1.25215	0.00330203	9.39856e-05	1.03787	up	1.03787
FLRT3	0.077782	0.00541164	-0.972216	down	-0.972216	0.711996	0.545827	-0.490615	down	-0.490615
TNFRSF1A	0.077782	0.00540573	1.52638	up	1.52638	0.0585999	0.00992098	0.65698	mixed	0.65698
CDC23	0.077782	0.00540912	-0.788108	down	-0.788108	0.0820109	0.0172861	-1.04666	down	-1.04666
RPL37	0.0779961	0.00543959	-0.763208	down	-0.763208	0.000520857	5.80305e-06	-0.829588	down	-0.829588
SNORD72	0.0779961	0.00543959	-0.763208	down	-0.763208	0.000520857	5.80305e-06	-0.829588	down	-0.829588
LOC105379066	0.0783275	0.00547284	-0.628114	down	-0.628114	0.01129	0.000669153	-0.83842	down	-0.83842
CCNH	0.0783275	0.00547284	-0.628114	down	-0.628114	0.01129	0.000669153	-0.83842	down	-0.83842
MIR4505	0.0786224	0.00550839	1.36303	up	1.36303	0.416956	0.242374	0.731769	up	0.731769
ZNF800	0.0786224	0.00549858	-1.14304	down	-1.14304	0.116478	0.0308708	-0.728826	down	-0.728826
LINC02875	0.0786224	0.00550871	1.03641	up	1.03641	0.000503855	5.54927e-06	0.942141	up	0.942141
TBX2	0.0786224	0.00550871	1.03641	up	1.03641	0.000503855	5.54927e-06	0.942141	up	0.942141
PSPH	0.0787394	0.00552257	-0.718993	down	-0.718993	0.523892	0.340812	0.849986	up	0.849986
XRCC2	0.0787394	0.00552709	-0.841193	down	-0.841193	0.014676	0.00104	-0.954126	down	-0.954126
MIR4458HG	0.0788627	0.00557656	-0.690769	down	-0.690769	0.0609348	0.0105232	-0.946289	down	-0.946289
MIR4458	0.0788627	0.00557656	-0.690769	down	-0.690769	0.0609348	0.0105232	-0.946289	down	-0.946289
RFTN2	0.0788627	0.00556443	-0.750055	down	-0.750055	0.449601	0.270922	-0.380919	down	-0.380919
ISM1	0.0788627	0.00555946	-1.16815	down	-1.16815
GRAMD2A	0.0788627	0.00557578	1.07934	up	1.07934	0.212631	0.0827577	-0.802666	down	-0.802666
HOXA3	0.0788627	0.00555555	1.23089	up	1.23089	0.0404678	0.00537368	0.997096	up	0.997096
HOXA4	0.0788627	0.00555555	1.23089	up	1.23089	0.0897625	0.0200189	1.15837	up	1.15837
HOXA5	0.0788627	0.00555555	1.23089	up	1.23089	0.0498094	0.00754336	1.15837	up	1.15837
HOXA6	0.0788627	0.00555555	1.23089	up	1.23089	0.0498094	0.00754336	1.15837	up	1.15837
HOXA7	0.0788627	0.00555555	1.23089	up	1.23089	0.0404678	0.00537368	0.997096	up	0.997096
PKM	0.0788627	0.00557578	1.07934	up	1.07934	0.212631	0.0827577	-0.802666	down	-0.802666
LINC02226	0.0788627	0.00557656	-0.690769	down	-0.690769	0.0609348	0.0105232	-0.946289	down	-0.946289
H2AC17	0.0788627	0.00554766	-1.07157	down	-1.07157	0.122271	0.0334626	-0.928361	down	-0.928361
H3C12	0.0788627	0.00554766	-1.07157	down	-1.07157	0.122271	0.0334626	-0.928361	down	-0.928361
GOSR1	0.0788627	0.00554857	-0.643686	down	-0.643686	0.238816	0.0992203	-0.503065	mixed	-0.503065
DPYD-AS1	0.0791626	0.00560384	-0.91811	down	-0.91811
PES1	0.0791626	0.00561313	-1.24587	down	-1.24587	0.278835	0.126395	0.642386	up	0.642386
CKAP2	0.0791626	0.00560902	-1.2172	down	-1.2172	0.285659	0.132363	-0.665628	down	-0.665628
GAL3ST1	0.0791626	0.00561313	-1.24587	down	-1.24587	0.278835	0.126395	0.642386	up	0.642386
SEPTIN1	0.0792741	0.00562617	0.906155	up	0.906155	0.281127	0.128654	-0.44097	down	-0.44097
SNORD58C	0.0793536	0.005652	-0.836954	down	-0.836954	0.104133	0.0257263	-0.784178	down	-0.784178
RPL17-C18orf32	0.0793536	0.005652	-0.836954	down	-0.836954	0.104133	0.0257263	-0.784178	down	-0.784178
SNORD58B	0.0793536	0.005652	-0.836954	down	-0.836954	0.181485	0.0643157	-0.784178	down	-0.784178
SNORD58A	0.0793536	0.005652	-0.836954	down	-0.836954	0.181485	0.0643157	-0.784178	down	-0.784178
DROSHA	0.0793536	0.00565235	-1.07514	down	-1.07514	4.6541e-05	1.89926e-07	-0.935814	down	-0.935814
C18orf32	0.0793536	0.005652	-0.836954	down	-0.836954	0.104133	0.0257263	-0.784178	down	-0.784178
C5orf22	0.0793536	0.00565235	-1.07514	down	-1.07514	4.6541e-05	1.89926e-07	-0.935814	down	-0.935814
RPL17	0.0793536	0.005652	-0.836954	down	-0.836954	0.104133	0.0257263	-0.784178	down	-0.784178
SMARCD2	0.0793536	0.00564446	1.65429	up	1.65429	0.109082	0.0278252	0.80465	up	0.80465
MIR2277	0.0795817	0.00567374	-1.16586	down	-1.16586	0.129637	0.0369898	-0.940567	down	-0.940567
POU5F2	0.0795817	0.00567374	-1.16586	down	-1.16586	0.129637	0.0369898	-0.940567	down	-0.940567
ARB2A	0.0795817	0.00567374	-1.16586	down	-1.16586	0.129637	0.0369898	-0.940567	down	-0.940567
RASA4CP	0.0799137	0.00570775	-0.749928	down	-0.749928	0.00145902	2.65525e-05	-1.33325	down	-1.33325
PCNX4	0.0799137	0.00570731	-0.73508	down	-0.73508	5.21138e-05	2.20976e-07	-0.948002	down	-0.948002
POLR2J4	0.0799137	0.00570775	-0.749928	down	-0.749928	0.00145902	2.65525e-05	-1.33325	down	-1.33325
LOC107985567	0.079993	0.00574066	-1.2822	down	-1.2822	0.484701	0.30439	-0.54458	mixed	-0.54458
MEI1	0.079993	0.00574066	-1.2822	down	-1.2822	0.226544	0.0908493	-0.439438	down	-0.439438
ATM	0.079993	0.0057413	-0.834161	down	-0.834161	0.385924	0.214436	-0.422143	down	-0.422143
SNU13	0.079993	0.00574066	-1.2822	down	-1.2822	0.484701	0.30439	-0.54458	mixed	-0.54458
NPAT	0.079993	0.0057413	-0.834161	down	-0.834161	0.385924	0.214436	-0.422143	down	-0.422143
LOC646548	0.079993	0.00574964	-1.05435	down	-1.05435
SLC8A3	0.079993	0.00574964	-1.05435	down	-1.05435
C22orf46P	0.079993	0.00574066	-1.2822	down	-1.2822	0.484701	0.30439	-0.54458	mixed	-0.54458
LINC00467	0.079993	0.00574338	-0.679607	down	-0.679607	0.111749	0.0289101	-0.712604	down	-0.712604
LOC100129203	0.0800982	0.00577275	-1.06415	down	-1.06415	0.00537721	0.000205781	-1.17807	down	-1.17807
LNCRNA-IUR	0.0800982	0.00577275	-1.06415	down	-1.06415	0.00537721	0.000205781	-1.17807	down	-1.17807
CCR10	0.0800982	0.00577046	0.872456	up	0.872456	0.251886	0.107587	-0.744956	down	-0.744956
PLEKHH3	0.0800982	0.00577046	0.872456	up	0.872456	0.251886	0.107587	-0.744956	down	-0.744956
CNTNAP1	0.0800982	0.00577046	0.872456	up	0.872456	0.387043	0.215233	0.569073	up	0.569073
NAA38	0.0806704	0.0058192	1.49466	up	1.49466	0.0462246	0.0066202	1.45176	up	1.45176
LOC105379087	0.0807368	0.00584076	-0.8547	down	-0.8547	0.115221	0.0302644	-0.940567	down	-0.940567
TMEM11-DT	0.0807368	0.00584489	-1.28981	down	-1.28981	0.858777	0.734617	0.44182	up	0.44182
C12orf71	0.0807368	0.00583698	1.1045	up	1.1045
TMEM11	0.0807368	0.00584489	-1.28981	down	-1.28981	0.858777	0.734617	0.44182	up	0.44182
GRASLND	0.0809833	0.00587321	-0.993426	down	-0.993426	0.395487	0.223387	-0.464157	down	-0.464157
RNF144A	0.0809833	0.00587321	-0.993426	down	-0.993426	0.395487	0.223387	-0.464157	down	-0.464157
FAM229A	0.0810501	0.0058833	-0.989565	down	-0.989565	0.513628	0.331639	-0.507445	down	-0.507445
BSDC1	0.0810501	0.0058833	-0.989565	down	-0.989565	0.513628	0.331639	-0.507445	down	-0.507445
ATRN	0.0811954	0.0058991	-1.26608	down	-1.26608	0.934031	0.847494	0.464607	up	0.464607
LOC101928077	0.0815714	0.00593323	1.10636	up	1.10636
TMC2	0.0815714	0.00594191	-1.01482	down	-1.01482
SNX4	0.0815714	0.00594225	-0.578782	down	-0.578782	0.0503263	0.00768031	-0.512758	down	-0.512758
C1QL1	0.0820383	0.00598688	-0.922245	down	-0.922245	0.768542	0.617801	-0.248092	down	-0.248092
OXT	0.0820383	0.00598409	1.33741	up	1.33741
ELOA-AS1	0.0823411	0.0060143	-1.28995	down	-1.28995	0.0488669	0.00732154	-0.968457	down	-0.968457
ZFHX4-AS1	0.0823641	0.00603197	-0.927414	down	-0.927414
LOC107986952	0.0823641	0.00603197	-0.927414	down	-0.927414
ZFHX4	0.0823641	0.00603197	-0.927414	down	-0.927414
CDON	0.0824007	0.00603998	0.759158	up	0.759158	0.437383	0.259858	-0.713447	down	-0.713447
CCNI2	0.0824664	0.00605013	-1.16478	down	-1.16478	0.0685694	0.0126808	0.798288	up	0.798288
MIR6836	0.0825438	0.00606115	0.798078	up	0.798078	0.705042	0.538532	-0.468013	mixed	-0.468013
SNX8	0.0825438	0.00606115	0.798078	up	0.798078	0.705042	0.538532	-0.468013	mixed	-0.468013
GOPC	0.0825656	0.00606809	-0.685338	down	-0.685338	0.304081	0.146585	-0.58828	down	-0.58828
ROS1	0.0825656	0.00606809	-0.685338	down	-0.685338	0.304081	0.146585	-0.58828	down	-0.58828
LOC112268307	0.0827159	0.0061074	1.51672	up	1.51672	0.778501	0.630396	-0.560971	down	-0.560971
AMER1	0.0827159	0.0061074	1.51672	up	1.51672	0.778501	0.630396	-0.560971	down	-0.560971
LGALS3	0.0827159	0.00609842	-1.36923	down	-1.36923	0.935722	0.851411	-0.0985135	mixed	-0.0985135
UBE2J1	0.0827159	0.00609245	-0.700442	down	-0.700442	0.552988	0.370271	0.361923	up	0.361923
TFDP2	0.0827159	0.00609038	-0.694202	down	-0.694202	0.00317159	8.75177e-05	-1.29465	down	-1.29465
CHMP7	0.0827159	0.00611124	1.15291	up	1.15291	0.94616	0.867896	-0.177328	mixed	-0.177328
ZSCAN16-AS1	0.082864	0.00613291	-1.28856	down	-1.28856	0.590873	0.411139	-0.532084	down	-0.532084
TNS3	0.082864	0.00612883	1.44071	up	1.44071	0.0325196	0.00383798	-1.33737	down	-1.33737
OR2B8P	0.082864	0.00613291	-1.28856	down	-1.28856	0.590873	0.411139	-0.532084	down	-0.532084
SLC16A10	0.0828695	0.00614404	-0.972848	down	-0.972848	0.365961	0.197393	-0.688969	down	-0.688969
IGFBP4	0.0828695	0.0061422	1.0511	up	1.0511	0.285957	0.132587	0.403583	up	0.403583
LOC101929767	0.0830681	0.00616951	1.09207	up	1.09207	0.00565589	0.00022716	1.28081	up	1.28081
LOC124900391	0.0830681	0.00616951	1.09207	up	1.09207	0.00565589	0.00022716	1.28081	up	1.28081
BRCA1	0.0830681	0.00616951	1.09207	up	1.09207	0.00565589	0.00022716	1.28081	up	1.28081
LOC105369690	0.083102	0.00618279	-1.10724	down	-1.10724	0.569028	0.387275	-0.47454	down	-0.47454
SULT6B2P	0.083102	0.00618279	-1.10724	down	-1.10724	0.569028	0.387275	-0.47454	down	-0.47454
ST8SIA1	0.083102	0.00618279	-1.10724	down	-1.10724	0.569028	0.387275	-0.47454	down	-0.47454
PMEPA1	0.0832854	0.00620182	1.13668	mixed	1.13668	0.483313	0.302579	-0.567134	down	-0.567134
POM121L9P	0.0833289	0.00621045	-0.998171	down	-0.998171	0.43749	0.259949	-0.470094	down	-0.470094
LOC105369632	0.0834195	0.0062292	1.06617	up	1.06617	0.602165	0.424105	0.290324	mixed	0.290324
LINC01721	0.0834195	0.00623339	-1.13343	down	-1.13343
ZNF823	0.0834195	0.00622945	1.45275	up	1.45275	0.279479	0.127248	-0.895424	down	-0.895424
SPSB2	0.0834195	0.0062292	1.06617	up	1.06617	0.602165	0.424105	0.290324	mixed	0.290324
MAN1B1-DT	0.08345	0.00624647	1.05581	up	1.05581	0.704525	0.537635	0.344453	mixed	0.344453
MAN1B1	0.08345	0.00624647	1.05581	up	1.05581	0.42601	0.250164	0.741794	up	0.741794
LOC124902338	0.08345	0.00624647	1.05581	up	1.05581	0.704525	0.537635	0.344453	mixed	0.344453
UAP1L1	0.08345	0.00624647	1.05581	up	1.05581	0.42601	0.250164	0.741794	up	0.741794
LOC105376289	0.0835992	0.00626751	1.54492	up	1.54492	0.0150973	0.0010943	1.01221	up	1.01221
IER5L-AS1	0.0835992	0.00626751	1.54492	up	1.54492	0.0150973	0.0010943	1.01221	up	1.01221
SLC35D2	0.0835992	0.00626845	0.851956	up	0.851956	0.0113242	0.000673311	-1.27364	down	-1.27364
ZNF367	0.0835992	0.00626845	0.851956	up	0.851956	0.0113242	0.000673311	-1.27364	down	-1.27364
PTPA	0.0835992	0.00626751	1.54492	up	1.54492	0.0150973	0.0010943	1.01221	up	1.01221
PELATON	0.0837407	0.00628448	-0.997008	down	-0.997008
LOC105372656	0.0837407	0.00628448	-0.997008	down	-0.997008
SLC52A3	0.0840549	0.00631894	-0.860002	down	-0.860002	0.269033	0.119774	-0.5554	down	-0.5554
TMEM63C	0.0840549	0.00631642	1.52441	up	1.52441	0.00233405	5.54863e-05	-1.5101	down	-1.5101
CIPC	0.0840549	0.00631642	1.52441	up	1.52441	0.00233405	5.54863e-05	-1.5101	down	-1.5101
CRIP2	0.084184	0.00634754	1.00318	up	1.00318	0.373015	0.203752	0.601924	up	0.601924
CSF2	0.084184	0.00635588	1.23055	up	1.23055
ZBTB49	0.084184	0.00635527	-0.766104	down	-0.766104	0.975656	0.928375	-0.0658927	mixed	-0.0658927
PACS2	0.084184	0.00634754	1.00318	up	1.00318	0.373015	0.203752	0.601924	up	0.601924
LYAR	0.084184	0.00635527	-0.766104	down	-0.766104	0.975656	0.928375	-0.0658927	mixed	-0.0658927
ISLR2	0.084184	0.00634679	1.27047	up	1.27047	0.271581	0.121365	-0.747059	down	-0.747059
TEX22	0.084184	0.00634754	1.00318	up	1.00318	0.373015	0.203752	0.601924	up	0.601924
MTA1	0.084184	0.00634754	1.00318	up	1.00318	0.373015	0.203752	0.601924	up	0.601924
MIR151A	0.0842404	0.00637103	1.17758	up	1.17758	0.604035	0.425814	-0.765713	down	-0.765713
PTK2	0.0842404	0.00637103	1.17758	up	1.17758	0.604035	0.425814	-0.765713	down	-0.765713
ZC3H14	0.0842404	0.00636564	-0.787917	down	-0.787917	0.242328	0.101245	-0.451928	down	-0.451928
TMEM106A	0.0843167	0.00638226	1.09207	up	1.09207	0.00565589	0.00022716	1.28081	up	1.28081
NBR1	0.0843167	0.00638226	1.09207	up	1.09207	0.00565589	0.00022716	1.28081	up	1.28081
LINC01089	0.0845306	0.00640391	0.943826	up	0.943826	0.0486928	0.0072481	1.11472	up	1.11472
RHOF	0.0845306	0.00640391	0.943826	up	0.943826	0.0486928	0.0072481	1.11472	up	1.11472
OSBPL5	0.0847594	0.00642674	-0.980706	down	-0.980706	0.431378	0.254976	0.636533	up	0.636533
ACCS	0.085413	0.00648181	-1.05052	down	-1.05052	0.0713773	0.0135254	-0.663572	down	-0.663572
RPS26	0.0856968	0.0065089	1.12194	up	1.12194	0.268506	0.119208	-0.55172	down	-0.55172
IKZF4	0.0856968	0.0065089	1.12194	up	1.12194	0.227675	0.0915843	-0.660621	down	-0.660621
SUOX	0.0856968	0.0065089	1.12194	up	1.12194	0.135498	0.0402772	1.03737	up	1.03737
CEBPZ	0.0858573	0.00653909	-0.845078	down	-0.845078	0.00280299	7.49861e-05	-0.941042	down	-0.941042
LINC01619	0.0858573	0.00653362	1.37873	up	1.37873	0.387747	0.216096	0.574552	up	0.574552
NDUFAF7	0.0858573	0.00653909	-0.845078	down	-0.845078	0.00280299	7.49861e-05	-0.941042	down	-0.941042
BTG1	0.0858573	0.00653362	1.37873	up	1.37873	0.387747	0.216096	0.574552	up	0.574552
KIFC2	0.0858573	0.00654331	-0.945043	down	-0.945043	0.149651	0.0468738	-1.06925	down	-1.06925
RPL36A-HNRNPH2	0.0861091	0.00657921	-1.18981	down	-1.18981	0.147162	0.0454171	-0.663844	down	-0.663844
TMEM80	0.0861091	0.00657549	1.57617	up	1.57617	0.20849	0.0798414	0.845651	up	0.845651
HNRNPH2	0.0861091	0.00657921	-1.18981	down	-1.18981	0.226544	0.0908342	-0.663844	down	-0.663844
RPL36A	0.0861091	0.00657921	-1.18981	down	-1.18981	0.147162	0.0454171	-0.663844	down	-0.663844
EPS8L2	0.0861091	0.00657549	1.57617	up	1.57617	0.20849	0.0798414	0.845651	up	0.845651
ZBP1	0.0861091	0.00657272	-0.964692	down	-0.964692
MIR6129	0.0861543	0.00659305	-0.876486	down	-0.876486	0.104133	0.0257327	0.790651	up	0.790651
MSI2	0.0861543	0.00659381	-0.822273	down	-0.822273	0.497371	0.316052	0.706986	mixed	0.706986
ZNF652	0.0861543	0.00659305	-0.876486	down	-0.876486	0.104133	0.0257327	0.790651	up	0.790651
MYO10	0.0862396	0.00660592	-1.19098	down	-1.19098	0.0246118	0.0024292	-1.26818	down	-1.26818
LOC105376289	0.0862945	0.00661571	1.54492	up	1.54492	0.0150973	0.0010943	1.01221	up	1.01221
IER5L-AS1	0.0862945	0.00661571	1.54492	up	1.54492	0.0150973	0.0010943	1.01221	up	1.01221
PTPA	0.0862945	0.00661571	1.54492	up	1.54492	0.0150973	0.0010943	1.01221	up	1.01221
SIRT5	0.087037	0.00667826	1.59876	up	1.59876	0.311758	0.152749	0.729774	up	0.729774
NOL7	0.087037	0.00667826	1.59876	up	1.59876	0.311758	0.152749	0.729774	up	0.729774
CLCF1	0.0872313	0.00669881	1.2536	up	1.2536	0.206663	0.0787911	0.695729	up	0.695729
POLD4	0.0872313	0.00669881	1.2536	up	1.2536	0.206663	0.0787911	0.695729	up	0.695729
LINC00359	0.0872619	0.00670795	-0.963037	down	-0.963037	0.0698654	0.0130698	-0.874288	down	-0.874288
TCAM1P	0.0872619	0.00671481	-1.13942	down	-1.13942	0.0347271	0.00421323	-0.770426	down	-0.770426
OXGR1	0.0872619	0.00670795	-0.963037	down	-0.963037	0.0698654	0.0130698	-0.874288	down	-0.874288
S100A10	0.0872619	0.0067181	-1.10976	down	-1.10976	0.250046	0.106376	-0.637242	down	-0.637242
SPIN1	0.0873121	0.00673891	1.18657	up	1.18657	0.560289	0.377568	-0.461298	down	-0.461298
LOC124902204	0.0873121	0.00673891	1.18657	up	1.18657	0.560289	0.377568	-0.461298	down	-0.461298
SCTR	0.0873121	0.00673067	-0.962734	down	-0.962734
LOC124900396	0.0873281	0.00674579	-1.13434	down	-1.13434
SSU72	0.0874065	0.00675751	-1.19067	down	-1.19067	0.965381	0.902655	0.0891039	mixed	0.0891039
TMEM240	0.0874065	0.00675751	-1.19067	down	-1.19067	0.965381	0.902655	0.0891039	mixed	0.0891039
SLC39A13-AS1	0.0875277	0.0067782	0.953939	up	0.953939	0.20485	0.0777975	-0.553515	down	-0.553515
MYBPC3	0.0875277	0.0067782	0.953939	up	0.953939	0.736434	0.577727	0.255638	mixed	0.255638
DCLRE1C	0.0875277	0.00677262	-1.0548	down	-1.0548	0.0913813	0.0206751	-0.780547	down	-0.780547
SPI1	0.0875277	0.0067782	0.953939	up	0.953939	0.20485	0.0777975	-0.553515	down	-0.553515
RTEL1-TNFRSF6B	0.0875347	0.0067844	0.784397	up	0.784397	0.833947	0.698629	-0.543908	down	-0.543908
RTEL1	0.0875347	0.0067844	0.784397	up	0.784397	0.833947	0.698629	-0.543908	down	-0.543908
TNFRSF6B	0.0875347	0.0067844	0.784397	up	0.784397	0.833947	0.698629	-0.543908	down	-0.543908
LOC158435	0.0881964	0.0068471	1.62052	up	1.62052	0.162925	0.0540024	-0.646323	down	-0.646323
ERCC6L2	0.0881964	0.0068471	1.62052	up	1.62052	0.162925	0.0540024	-0.646323	down	-0.646323
BMP6	0.0881964	0.00684247	1.13414	up	1.13414	0.983224	0.948112	0.0180517	mixed	0.0180517
FAM131B-AS2	0.0882001	0.00686209	0.858991	up	0.858991	0.121854	0.0332141	0.770136	up	0.770136
RHOG	0.0882001	0.00685488	0.940241	up	0.940241	0.205649	0.0781939	0.760981	up	0.760981
DYNC2LI1	0.0882001	0.00686451	-0.729867	down	-0.729867	0.106392	0.0266467	-0.707119	down	-0.707119
LINC02315	0.0882561	0.00687458	-1.06065	down	-1.06065
LOC100289495	0.0882745	0.00688776	-1.30747	down	-1.30747	0.0528876	0.00829782	-0.980016	down	-0.980016
SFT2D1	0.0882745	0.00688776	-1.30747	down	-1.30747	0.0528876	0.00829782	-0.980016	down	-0.980016
FSCN2	0.0882745	0.00689314	1.42363	up	1.42363	0.00415995	0.000137695	1.34128	up	1.34128
LOC254896	0.0882806	0.00690933	-1.06639	down	-1.06639	0.521776	0.339097	-0.530191	down	-0.530191
GHITM	0.0882806	0.00691075	-0.931993	down	-0.931993	0.0978877	0.0231702	-0.770018	down	-0.770018
TNFRSF10B-AS1	0.0882806	0.00690933	-1.06639	down	-1.06639	0.521776	0.339097	-0.530191	down	-0.530191
TNFRSF10B	0.0882806	0.00690933	-1.06639	down	-1.06639	0.521776	0.339097	-0.530191	down	-0.530191
LOC105374040	0.0884767	0.00693183	-0.979953	down	-0.979953	0.860227	0.73667	-0.381753	down	-0.381753
TGIF2-RAB5IF	0.0884843	0.00693815	-1.29082	down	-1.29082	0.329705	0.167394	0.716596	up	0.716596
RAB5IF	0.0884843	0.00693815	-1.29082	down	-1.29082	0.511217	0.329056	-0.445139	mixed	-0.445139
TGIF2	0.0884843	0.00693815	-1.29082	down	-1.29082	0.329705	0.167394	0.716596	up	0.716596
CD40	0.0885699	0.00695059	-1.2721	down	-1.2721
CCDC57	0.0885813	0.00695721	1.39407	up	1.39407	0.133641	0.0391823	-0.802141	down	-0.802141
ARF3	0.0888461	0.00698376	-1.0974	down	-1.0974	0.409811	0.235752	0.795556	up	0.795556
FKBP11	0.0888461	0.00698376	-1.0974	down	-1.0974	0.409811	0.235752	0.795556	up	0.795556
MAPKAP1	0.088974	0.00699957	1.66225	up	1.66225	0.251172	0.107071	-0.486284	down	-0.486284
RAB11FIP2	0.0891834	0.00702758	-0.769281	down	-0.769281	0.657444	0.48379	-0.414604	mixed	-0.414604
CASC2	0.0891834	0.00702758	-0.769281	down	-0.769281	0.657444	0.48379	-0.414604	mixed	-0.414604
LOC124904167	0.0893612	0.00704738	-0.825967	down	-0.825967	0.0494196	0.00745552	-0.907853	down	-0.907853
MTFR2	0.0895743	0.00706998	-1.14273	down	-1.14273	0.777627	0.62873	-0.354742	down	-0.354742
KPNB1	0.0903125	0.00713409	-0.959392	down	-0.959392	0.00573423	0.00023477	1.27233	up	1.27233
SNX3	0.0905498	0.00715869	-1.04636	down	-1.04636	0.158598	0.0516434	-0.718675	down	-0.718675
TEX52	0.0905653	0.00717164	-0.88332	down	-0.88332	0.107787	0.0272435	0.604151	mixed	0.604151
LOC124902860	0.0905653	0.00717164	-0.88332	down	-0.88332	0.107787	0.0272435	0.604151	mixed	0.604151
FOXM1	0.0905653	0.00717164	-0.88332	down	-0.88332	0.107787	0.0272435	0.604151	mixed	0.604151
TULP3	0.0905653	0.00717164	-0.88332	down	-0.88332	0.107787	0.0272435	0.604151	mixed	0.604151
RHNO1	0.0905653	0.00717164	-0.88332	down	-0.88332	0.107787	0.0272435	0.604151	mixed	0.604151
LINC01089	0.0906987	0.00718807	0.943826	up	0.943826	0.0486928	0.0072481	1.11472	up	1.11472
RHOF	0.0906987	0.00718807	0.943826	up	0.943826	0.0486928	0.0072481	1.11472	up	1.11472
ABHD11	0.0910236	0.0072197	1.31304	up	1.31304	0.435836	0.258543	-0.707707	down	-0.707707
LOC101929767	0.0910456	0.00723322	1.09207	up	1.09207	0.00565589	0.00022716	1.28081	up	1.28081
LOC124900391	0.0910456	0.00723322	1.09207	up	1.09207	0.00565589	0.00022716	1.28081	up	1.28081
MCAT	0.0910456	0.00723028	-0.986214	down	-0.986214	0.00546446	0.000215209	-1.16122	down	-1.16122
BRCA1	0.0910456	0.00723322	1.09207	up	1.09207	0.00565589	0.00022716	1.28081	up	1.28081
TMEM167A	0.0913055	0.0072716	-0.656266	down	-0.656266	0.00208529	4.71198e-05	-1.01555	down	-1.01555
ZNF862	0.0913055	0.00726567	-0.745931	down	-0.745931	0.0355388	0.00438768	-0.966829	down	-0.966829
SCARNA18	0.0913055	0.0072716	-0.656266	down	-0.656266	0.00208529	4.71198e-05	-1.01555	down	-1.01555
XRCC4	0.0913055	0.0072716	-0.656266	down	-0.656266	0.00208529	4.71198e-05	-1.01555	down	-1.01555
KLC1	0.0914052	0.00728545	-0.767971	down	-0.767971	0.0668526	0.0121814	1.06204	up	1.06204
ZFYVE21	0.0914052	0.00728545	-0.767971	down	-0.767971	0.0668526	0.0121814	1.06204	up	1.06204
COA8	0.0914052	0.00728545	-0.767971	down	-0.767971	0.0668526	0.0121814	1.06204	up	1.06204
MIR1286	0.0914854	0.00733858	1.18394	up	1.18394	0.979366	0.937501	-0.0254782	mixed	-0.0254782
LINC00562	0.0914854	0.00733408	-1.07575	down	-1.07575	0.0287017	0.00315871	-0.888552	down	-0.888552
MIR548BB	0.0914854	0.00731946	-0.959726	down	-0.959726	0.00456974	0.000163987	-1.1691	down	-1.1691
LOC105372710	0.0914854	0.00730762	-0.713047	down	-0.713047	0.379118	0.20864	-0.541081	down	-0.541081
LOC124901583	0.0914854	0.00731982	-0.799618	down	-0.799618	0.168455	0.0569375	-0.388963	down	-0.388963
LOC124903172	0.0914854	0.00733408	-1.07575	down	-1.07575	0.0287017	0.00315871	-0.888552	down	-0.888552
LOC124906379	0.0914854	0.00731946	-0.959726	down	-0.959726	0.00456974	0.000163987	-1.1691	down	-1.1691
FHIT	0.0914854	0.00731946	-0.959726	down	-0.959726	0.00456974	0.000163987	-1.1691	down	-1.1691
PMS2CL	0.0914854	0.00731982	-0.799618	down	-0.799618	0.168455	0.0569375	-0.388963	down	-0.388963
DRG1	0.0914854	0.00734511	-1.24225	down	-1.24225	0.238759	0.0990731	0.682682	up	0.682682
EIF4ENIF1	0.0914854	0.00734511	-1.24225	down	-1.24225	0.238759	0.0990731	0.682682	up	0.682682
MAGEE1	0.0914854	0.00732561	-1.16863	down	-1.16863	0.369906	0.20089	-0.771108	down	-0.771108
RTN4R	0.0914854	0.00733858	1.18394	up	1.18394	0.979366	0.937501	-0.0254782	mixed	-0.0254782
RSPH10B2	0.0914854	0.00731982	-0.799618	down	-0.799618	0.423015	0.247869	0.645761	up	0.645761
SUCLA2	0.0914854	0.00733408	-1.07575	down	-1.07575	0.0287017	0.00315871	-0.888552	down	-0.888552
SFI1	0.0914854	0.00734511	-1.24225	down	-1.24225	0.238759	0.0990731	0.682682	up	0.682682
ABCA2	0.0916746	0.00736624	1.23204	up	1.23204	0.0185346	0.00156917	-1.11485	down	-1.11485
FUT7	0.0916746	0.00736624	1.23204	up	1.23204	0.0185346	0.00156917	-1.11485	down	-1.11485
REP15	0.0919917	0.00739766	-1.21397	down	-1.21397	0.350152	0.18399	0.845171	up	0.845171
PPFIBP1	0.0919917	0.00739766	-1.21397	down	-1.21397	0.350152	0.18399	0.845171	up	0.845171
LOC124900464	0.0922909	0.00742769	-0.717052	down	-0.717052	0.0204963	0.00182154	-1.03992	down	-1.03992
TMEM230	0.0922909	0.00742769	-0.717052	down	-0.717052	0.0204963	0.00182154	-1.03992	down	-1.03992
PCNA	0.0922909	0.00742769	-0.717052	down	-0.717052	0.0204963	0.00182154	-1.03992	down	-1.03992
ANKRD12	0.0923946	0.00744799	0.823788	up	0.823788	0.0428048	0.00586995	-0.536003	down	-0.536003
NDUFV2	0.0923946	0.00744799	0.823788	up	0.823788	0.0428048	0.00586995	-0.536003	down	-0.536003
PTPN18	0.092531	0.00746661	1.64074	up	1.64074	0.84239	0.711306	0.701905	up	0.701905
PLEC	0.092531	0.00747096	1.36447	up	1.36447	0.898477	0.795348	-0.321194	mixed	-0.321194
PARP10	0.092531	0.00747096	1.36447	up	1.36447	0.898477	0.795348	-0.321194	mixed	-0.321194
MIR3679	0.0927471	0.00749441	-0.951624	down	-0.951624	0.619082	0.442035	-0.575171	down	-0.575171
MGAT5	0.0927471	0.00749441	-0.951624	down	-0.951624	0.619082	0.442035	-0.575171	down	-0.575171
LINC01303	0.0927565	0.00750185	-1.21446	down	-1.21446
LSR	0.0927565	0.00750717	0.870817	up	0.870817	0.0920664	0.02106	0.513443	up	0.513443
USF2	0.0927565	0.00750717	0.870817	up	0.870817	0.0920664	0.02106	0.513443	up	0.513443
SLC15A4	0.0928993	0.00752474	-0.816079	down	-0.816079	0.225664	0.0902917	-0.558768	down	-0.558768
MIR1256	0.092923	0.00753267	-1.03485	down	-1.03485	0.0627742	0.0110398	0.90316	up	0.90316
EIF4G3	0.092923	0.00753267	-1.03485	down	-1.03485	0.0627742	0.0110398	0.90316	up	0.90316
RHEBL1	0.0929687	0.00754239	-1.08223	down	-1.08223	0.0416803	0.00561134	-1.0342	down	-1.0342
KPNB1-DT	0.0930344	0.00755374	-0.959392	down	-0.959392	0.00573423	0.00023477	1.27233	up	1.27233
FKBP4	0.0931605	0.00757001	-0.686843	down	-0.686843	0.298001	0.14163	-0.661559	mixed	-0.661559
UCKL1-AS1	0.093367	0.00760673	0.918577	up	0.918577	0.639403	0.463689	-0.279811	down	-0.279811
DDX41	0.093367	0.00761128	-0.834639	down	-0.834639	0.00454506	0.000162807	-1.12986	down	-1.12986
FAM193B	0.093367	0.00761128	-0.834639	down	-0.834639	0.00454506	0.000162807	-1.12986	down	-1.12986
SUSD1	0.093367	0.00761312	0.872264	up	0.872264	0.00714034	0.000325572	1.09363	up	1.09363
OTULIN-DT	0.093367	0.00761699	-0.612936	down	-0.612936	0.287971	0.134043	-0.487608	down	-0.487608
DOK3	0.093367	0.00761128	-0.834639	down	-0.834639	0.00454506	0.000162807	-1.12986	down	-1.12986
ACVR2B	0.093367	0.00761087	-0.931853	down	-0.931853	0.0938155	0.0217204	1.14702	up	1.14702
EXOG	0.093367	0.00761087	-0.931853	down	-0.931853	0.0938155	0.0217204	1.14702	up	1.14702
FNDC11	0.0938451	0.00766207	0.715463	up	0.715463
LOC101927293	0.0942263	0.00777243	-1.11804	down	-1.11804	0.562839	0.380075	-0.47099	down	-0.47099
LOC105370670	0.0942263	0.00770404	-0.910152	down	-0.910152
LINC00680	0.0942263	0.00777243	-1.11804	down	-1.11804	0.562839	0.380075	-0.47099	down	-0.47099
LINC00680-GUSBP4	0.0942263	0.00777243	-1.11804	down	-1.11804	0.562839	0.380075	-0.47099	down	-0.47099
ZNF782	0.0942263	0.00773632	-0.810628	down	-0.810628	0.135054	0.0399527	-0.613297	down	-0.613297
ADAMTS15	0.0942263	0.00774267	-1.10197	down	-1.10197	0.0987178	0.0235892	0.846721	up	0.846721
GUSBP4	0.0942263	0.00777243	-1.11804	down	-1.11804	0.562839	0.380075	-0.47099	down	-0.47099
ACO1	0.0942263	0.00776496	-1.2634	down	-1.2634	0.738013	0.579588	-0.239618	down	-0.239618
SNORD101	0.0942263	0.00773883	1.12194	up	1.12194	0.505119	0.32284	-0.495832	down	-0.495832
SNORD100	0.0942263	0.00773883	1.12194	up	1.12194	0.505119	0.32284	-0.495832	down	-0.495832
SNORA33	0.0942263	0.00773883	1.12194	up	1.12194	0.505119	0.32284	-0.495832	down	-0.495832
RPS12	0.0942263	0.00773883	1.12194	up	1.12194	0.505119	0.32284	-0.495832	down	-0.495832
STAT1	0.0942263	0.00774823	-1.19305	down	-1.19305	0.0278488	0.0029963	-1.28731	down	-1.28731
MFSD14CP	0.0942263	0.00773632	-0.810628	down	-0.810628	0.135054	0.0399527	-0.613297	down	-0.613297
RGS20	0.0942263	0.00771511	1.22493	up	1.22493	0.366693	0.198048	-0.691069	down	-0.691069
TMEM184C	0.0943028	0.00778485	-0.821715	down	-0.821715	0.311615	0.152578	-0.640196	down	-0.640196
LINC01413	0.0943121	0.00782223	-0.970048	down	-0.970048
124900607	0.0943121	0.0078211	-0.721369	down	-0.721369	9.55409e-05	5.18291e-07	-1.09126	down	-1.09126
FTH1	0.0943121	0.00782047	1.46492	up	1.46492	0.254178	0.109004	-0.649744	down	-0.649744
LOC399900	0.0943121	0.00782047	1.46492	up	1.46492	0.254178	0.109004	-0.649744	down	-0.649744
ZNF649	0.0943121	0.00780625	1.02953	up	1.02953	0.787645	0.640554	0.14979	mixed	0.14979
BEST1	0.0943121	0.00782047	1.46492	up	1.46492	0.254178	0.109004	-0.649744	down	-0.649744
ZNF577	0.0943121	0.00780625	1.02953	up	1.02953	0.787645	0.640554	0.14979	mixed	0.14979
LAPTM4A	0.0943121	0.0078211	-0.721369	down	-0.721369	9.55409e-05	5.18291e-07	-1.09126	down	-1.09126
SNORA11B	0.0944196	0.00783726	-1.33626	down	-1.33626	0.00998942	0.000546772	-0.684071	down	-0.684071
WAKMAR2	0.0944196	0.00785284	-0.992696	down	-0.992696	0.0686446	0.0127228	-1.06743	down	-1.06743
ZNF383	0.0944196	0.00788001	1.2897	up	1.2897	0.986569	0.957389	-0.166359	down	-0.166359
ZNF585A	0.0944196	0.00788001	1.2897	up	1.2897	0.986569	0.957389	-0.166359	down	-0.166359
JPT1	0.0944196	0.00787909	1.08231	up	1.08231	0.0172516	0.00139975	1.24349	up	1.24349
SLC46A2	0.0944196	0.00787067	-0.874803	down	-0.874803
SUMO2	0.0944196	0.00787909	1.08231	up	1.08231	0.0172516	0.00139975	1.24349	up	1.24349
TNFAIP3	0.0944196	0.00785284	-0.992696	down	-0.992696	0.0686446	0.0127228	-1.06743	down	-1.06743
D2HGDH	0.0944196	0.00785687	1.2351	up	1.2351	0.472136	0.291759	-0.588282	down	-0.588282
DGLUCY	0.0944196	0.00783726	-1.33626	down	-1.33626	0.00998942	0.000546772	-0.684071	down	-0.684071
ZNF585B	0.0944196	0.00788001	1.2897	up	1.2897	0.986569	0.957389	-0.166359	down	-0.166359
ESPNP	0.0946386	0.00790441	-1.24785	down	-1.24785	0.545741	0.362201	-0.317879	down	-0.317879
NKILA	0.0949612	0.00795105	1.13668	up	1.13668	0.483313	0.302579	-0.567134	down	-0.567134
SNHG11	0.0949612	0.00795592	-0.669137	down	-0.669137	0.0391533	0.00513144	-1.09157	down	-1.09157
SNORA71E	0.0949612	0.00795592	-0.669137	down	-0.669137	0.0391533	0.00513144	-1.09157	down	-1.09157
SNORA60	0.0949612	0.00795592	-0.669137	down	-0.669137	0.0391533	0.00513144	-1.09157	down	-1.09157
TFCP2	0.0954422	0.0080024	1.3592	up	1.3592	0.203032	0.0768701	-0.791916	down	-0.791916
LDHAL6A	0.0955065	0.00801397	1.12167	up	1.12167
LOC124905111	0.0957009	0.00803647	0.922019	up	0.922019	0.535667	0.35208	-0.557916	down	-0.557916
MIR6507	0.0957887	0.00805004	-1.07521	down	-1.07521
HPSE2	0.0957887	0.00805004	-1.07521	down	-1.07521
ADSS1	0.0959215	0.00806741	0.944871	up	0.944871	0.773819	0.623947	0.354912	mixed	0.354912
INF2	0.0959215	0.00806741	0.944871	up	0.944871	0.773819	0.623947	0.354912	mixed	0.354912
LOC101928044	0.0960393	0.00808698	1.19895	up	1.19895
LOC124900388	0.0960393	0.00808698	1.19895	up	1.19895
NLRP1	0.0960393	0.00808698	1.19895	up	1.19895
BICDL1	0.0960393	0.00808974	-1.18971	down	-1.18971	0.265786	0.117123	0.853598	up	0.853598
HOOK1	0.0966161	0.00814458	-0.72968	down	-0.72968	0.297627	0.141314	-0.876373	down	-0.876373
PRICKLE1	0.0966842	0.00815658	1.11026	up	1.11026	0.0568964	0.00946441	-1.06879	down	-1.06879
FAM239A	0.0967343	0.00816706	-0.941205	down	-0.941205	0.266083	0.117449	-0.533833	down	-0.533833
LOC124900487	0.0967343	0.00816706	-0.941205	down	-0.941205	0.266083	0.117449	-0.533833	down	-0.533833
LOC389906	0.0967343	0.00816706	-0.941205	down	-0.941205	0.266083	0.117449	-0.533833	down	-0.533833
FAM239B	0.0967343	0.00816706	-0.941205	down	-0.941205	0.266083	0.117449	-0.533833	down	-0.533833
LMTK3	0.0967667	0.00817605	1.46007	up	1.46007	0.236437	0.0973746	-0.493155	mixed	-0.493155
CPLX2	0.0969705	0.00820582	-0.965888	down	-0.965888	0.00172029	3.39869e-05	-1.50377	down	-1.50377
CCDC9B	0.0969705	0.00820373	1.19035	up	1.19035	0.36002	0.192393	-0.811212	down	-0.811212
TMEM263	0.0971428	0.00822669	-0.973324	down	-0.973324	0.078282	0.015983	-0.731383	down	-0.731383
ADISSP	0.0971499	0.00823357	-1.30091	down	-1.30091	0.98139	0.943365	-0.549188	down	-0.549188
LOC105375501	0.0971599	0.00824071	-1.13161	down	-1.13161	0.47041	0.290053	0.520309	up	0.520309
MIR182	0.0971599	0.00824071	-1.13161	down	-1.13161	0.47041	0.290053	0.520309	up	0.520309
MIR183	0.0971599	0.00824071	-1.13161	down	-1.13161	0.47041	0.290053	0.520309	up	0.520309
MIR96	0.0971599	0.00824071	-1.13161	down	-1.13161	0.47041	0.290053	0.520309	up	0.520309
TTC14-DT	0.0972738	0.00830072	-0.739627	down	-0.739627	1.98531e-05	5.65836e-08	-0.847036	down	-0.847036
FASTK	0.0972738	0.00829768	-1.21798	down	-1.21798	0.46587	0.28586	0.965807	up	0.965807
TTC14	0.0972738	0.00830072	-0.739627	down	-0.739627	1.98531e-05	5.65836e-08	-0.847036	down	-0.847036
CCDC39	0.0972738	0.00830072	-0.739627	down	-0.739627	1.98531e-05	5.65836e-08	-0.847036	down	-0.847036
NBPF18P	0.0972738	0.00829883	-1.10976	down	-1.10976	0.0285819	0.00313078	-1.46807	down	-1.46807
PRNP	0.0972738	0.00829892	-0.662594	down	-0.662594	0.924209	0.830339	0.106839	mixed	0.106839
ZNF704	0.0972738	0.0082717	-1.27656	down	-1.27656	0.982755	0.946788	0.0234472	mixed	0.0234472
BMP3	0.0972738	0.00828044	-1.07444	down	-1.07444
RNF128	0.0972738	0.00826989	-1.02823	down	-1.02823	0.650982	0.476417	-0.4711	down	-0.4711
TMUB1	0.0972738	0.00829768	-1.21798	down	-1.21798	0.46587	0.28586	0.965807	up	0.965807
DUSP15	0.0973873	0.0083167	-1.21965	down	-1.21965	0.997531	0.993783	0.00267385	mixed	0.00267385
FOXS1	0.0973873	0.0083167	-1.21965	down	-1.21965	0.997531	0.993783	0.00267385	mixed	0.00267385
TXNL4A	0.0976996	0.00834969	-1.29246	down	-1.29246	0.0390709	0.00509455	-0.94585	down	-0.94585
ANKRD20A21P	0.0977705	0.00837059	-1.03378	down	-1.03378	0.0720358	0.0137414	-0.880005	down	-0.880005
EMILIN1	0.0977705	0.00837473	1.04989	up	1.04989	0.138149	0.041477	0.583295	mixed	0.583295
LOC124904986	0.0977705	0.00837059	-1.03378	down	-1.03378	0.0720358	0.0137414	-0.880005	down	-0.880005
KHK	0.0977705	0.00837473	1.04989	up	1.04989	0.138149	0.041477	0.583295	mixed	0.583295
FOSL2-AS1	0.0977705	0.00837213	1.62818	up	1.62818	0.0568964	0.00944254	-1.31433	down	-1.31433
ANXA2R	0.0978123	0.00838464	1.19285	up	1.19285	0.156919	0.0506901	-0.724127	down	-0.724127
ANXA2R-OT1	0.0978123	0.00838464	1.19285	up	1.19285	0.156919	0.0506901	-0.724127	down	-0.724127
SNORA15B-2	0.0979602	0.00840365	-0.780458	down	-0.780458	0.012521	0.000798072	-0.745595	down	-0.745595
CCT6P1	0.0979602	0.00840365	-0.780458	down	-0.780458	0.012521	0.000798072	-0.745595	down	-0.745595
SNORA22	0.0979602	0.00840365	-0.780458	down	-0.780458	0.012521	0.000798072	-0.745595	down	-0.745595
LINC01352	0.0979989	0.00842471	-1.2822	down	-1.2822	0.364108	0.195497	-0.582964	down	-0.582964
RNU6ATAC35P	0.0979989	0.00842471	-1.2822	down	-1.2822	0.364108	0.195497	-0.582964	down	-0.582964
KCNK4-CATSPERZ	0.0979989	0.00843216	1.08632	up	1.08632	0.00242578	5.97898e-05	1.369	up	1.369
DNASE1L2	0.0979989	0.00843233	-1.13815	down	-1.13815	0.338529	0.174548	-0.465429	down	-0.465429
E4F1	0.0979989	0.00843233	-1.13815	down	-1.13815	0.338529	0.174548	-0.465429	down	-0.465429
ESRRA	0.0979989	0.00843216	1.08632	up	1.08632	0.0926952	0.0212734	-0.799142	down	-0.799142
CATSPERZ	0.0979989	0.00843216	1.08632	up	1.08632	0.0926952	0.0212734	-0.799142	down	-0.799142
HLX	0.0979989	0.00842471	-1.2822	down	-1.2822	0.364108	0.195497	-0.582964	down	-0.582964
KCNK4	0.0979989	0.00843216	1.08632	up	1.08632	0.00242578	5.97898e-05	1.369	up	1.369
MTARC2	0.0979989	0.00842471	-1.2822	down	-1.2822	0.364108	0.195497	-0.582964	down	-0.582964
GPR137	0.0979989	0.00843216	1.08632	up	1.08632	0.00242578	5.97898e-05	1.369	up	1.369
MTARC1	0.0979989	0.00842471	-1.2822	down	-1.2822	0.364108	0.195497	-0.582964	down	-0.582964
LAMC1	0.098263	0.00846141	1.16511	up	1.16511	0.334609	0.171422	0.894671	up	0.894671
GSG1	0.0984417	0.00848317	1.07902	up	1.07902	0.79149	0.646014	-0.270948	down	-0.270948
LRPPRC	0.0986928	0.00851119	-0.742415	down	-0.742415	0.201181	0.0756583	-0.596584	down	-0.596584
STOML2	0.0988345	0.00853563	1.35755	up	1.35755	0.079528	0.0163272	-0.822306	down	-0.822306
PMS2P3	0.0988345	0.0085362	-0.67604	down	-0.67604	0.0862522	0.0187416	-0.622086	down	-0.622086
ATOSB	0.0988345	0.00853563	1.35755	up	1.35755	0.079528	0.0163272	-0.822306	down	-0.822306
LINC00867	0.098968	0.00856483	-1.02171	down	-1.02171	0.163729	0.054502	0.724321	up	0.724321
DCTN2	0.098968	0.00857974	-0.818356	down	-0.818356	0.996053	0.990392	-0.0040469	mixed	-0.0040469
KIF5A	0.098968	0.00857974	-0.818356	down	-0.818356	0.996053	0.990392	-0.0040469	mixed	-0.0040469
FAM204A	0.098968	0.00856483	-1.02171	down	-1.02171	0.163729	0.054502	0.724321	up	0.724321
ACTR6	0.098968	0.00856854	-1.01659	down	-1.01659	0.225226	0.0900874	-0.798482	down	-0.798482
CAVIN3	0.0989927	0.0085947	1.08729	up	1.08729
ID2	0.0989927	0.00859089	1.46037	up	1.46037	0.278393	0.126104	-0.464815	down	-0.464815
PSMB2	0.0991532	0.00861504	0.900215	up	0.900215	0.895211	0.788676	0.162818	mixed	0.162818
LOC128092248	0.0992311	0.00862824	1.08512	up	1.08512	0.00460599	0.000166481	1.0273	up	1.0273
ABL1	0.0992311	0.00862824	1.08512	up	1.08512	0.00460599	0.000166481	1.0273	up	1.0273
LINC02478	0.0992674	0.00864391	1.20681	up	1.20681	0.983998	0.9497	-0.0265417	mixed	-0.0265417
RASGRP3-AS1	0.0992674	0.00865065	-0.790517	down	-0.790517	0.506346	0.324412	0.513121	mixed	0.513121
LOC105374455	0.0992674	0.00865065	-0.790517	down	-0.790517	0.506346	0.324412	0.513121	mixed	0.513121
FAM98A	0.0992674	0.00865065	-0.790517	down	-0.790517	0.506346	0.324412	0.513121	mixed	0.513121
ITGB6	0.0992674	0.00864391	1.20681	up	1.20681	0.983998	0.9497	-0.0265417	mixed	-0.0265417
RBMS1	0.0992674	0.00864391	1.20681	up	1.20681	0.878923	0.76339	-0.103001	down	-0.103001
RHOV	0.0996018	0.00868624	0.957139	up	0.957139	0.0427282	0.00583883	1.2269	up	1.2269
OTULIN	0.0997444	0.00870513	-0.612936	down	-0.612936	0.287971	0.134043	-0.487608	down	-0.487608
LOC101927855	0.0999643	0.00873795	1.03641	up	1.03641	0.000608856	7.25674e-06	0.942141	up	0.942141
TBX2-AS1	0.0999643	0.00873795	1.03641	up	1.03641	0.000608856	7.25674e-06	0.942141	up	0.942141
GLB1	0.0999643	0.00875666	-0.948934	down	-0.948934	0.969957	0.913408	0.0274886	mixed	0.0274886
HOXB6	0.0999643	0.00875278	1.36781	up	1.36781	0.123019	0.0339006	1.25962	up	1.25962
HOXB7	0.0999643	0.00875278	1.36781	up	1.36781	0.123019	0.0339006	1.25962	up	1.25962
HOXB8	0.0999643	0.00875278	1.36781	up	1.36781	0.123019	0.0339006	1.25962	up	1.25962
HOXB9	0.0999643	0.00875278	1.36781	up	1.36781	0.123019	0.0339006	1.25962	up	1.25962
MIR196A1	0.0999643	0.00875278	1.36781	up	1.36781	0.123019	0.0339006	1.25962	up	1.25962
GDAP1	0.0999643	0.00874999	-1.01278	down	-1.01278	0.599776	0.421684	-0.432659	down	-0.432659
TMPPE	0.0999643	0.00875666	-0.948934	down	-0.948934	0.969957	0.913408	0.0274886	mixed	0.0274886
TMEM250	0.100191	0.00878299	1.14164	up	1.14164	0.6311	0.454337	-0.806156	down	-0.806156
SCARB1	0.100224	0.00879237	1.28325	up	1.28325	0.926657	0.834457	0.0619012	mixed	0.0619012
CFI	0.100391	0.00882648	-0.845218	down	-0.845218	0.089548	0.0199406	-0.61531	down	-0.61531
CGN	0.100391	0.0088262	1.14349	up	1.14349	0.131531	0.0378883	0.929441	up	0.929441
MIR554	0.100391	0.0088262	1.14349	up	1.14349	0.131531	0.0378883	0.929441	up	0.929441
TUFT1	0.100391	0.0088262	1.14349	up	1.14349	0.131531	0.0378883	0.929441	up	0.929441
PLA2G12A	0.100391	0.00882648	-0.845218	down	-0.845218	0.089548	0.0199406	-0.61531	down	-0.61531
EFNA1	0.10058	0.00884964	1.42682	up	1.42682	0.467772	0.287305	0.941567	up	0.941567
SLC50A1	0.10058	0.00884964	1.42682	up	1.42682	0.467772	0.287305	0.941567	up	0.941567
CCDC124	0.100603	0.00885814	1.29093	up	1.29093	0.0928503	0.0213237	0.86908	up	0.86908
[truncated: 19,963 more rows]

## Sheet: KYSE
	KYSE	KYSE	KYSE	KYSE	KYSE
symbol	FDR	pval	rep.LogFC	direction	rank
LOC100288069	3.91619e-11	5.07344e-15	-1.18381	down	-1.18381
LOC101928626	3.91619e-11	5.07344e-15	-1.18381	down	-1.18381
LOC105378947	3.91619e-11	5.07344e-15	-1.18381	down	-1.18381
OR4F16	3.91619e-11	5.07344e-15	-1.18381	down	-1.18381
LOC100288069	4.10267e-11	7.97255e-15	-1.18381	down	-1.18381
LOC101928626	4.10267e-11	7.97255e-15	-1.18381	down	-1.18381
LOC105378947	4.10267e-11	7.97255e-15	-1.18381	down	-1.18381
LINC00115	4.10267e-11	7.97255e-15	-1.18381	down	-1.18381
OR4F16	4.10267e-11	7.97255e-15	-1.18381	down	-1.18381
EML3	7.94523e-10	2.05862e-13	-3.04441	down	-3.04441
TUT1	7.94523e-10	2.05862e-13	-3.04441	down	-3.04441
MTA2	7.94523e-10	2.05862e-13	-3.04441	down	-3.04441
RABL3	1.05116e-09	3.40444e-13	-1.28332	down	-1.28332
HGD	1.05116e-09	3.40444e-13	-1.28332	down	-1.28332
ZBTB7A	4.75356e-09	1.84748e-12	1.69155	up	1.69155
SPTLC2	4.27157e-08	1.93684e-11	-1.79092	down	-1.79092
MCM2	8.56052e-08	4.43608e-11	-1.20931	down	-1.20931
SCAPER	1.03938e-07	6.56369e-11	-1.14321	down	-1.14321
GMNN	1.03938e-07	6.73258e-11	-1.37764	down	-1.37764
LOC105371490	1.09238e-07	7.78348e-11	1.5027	up	1.5027
PAFAH1B1	1.09238e-07	7.78348e-11	1.5027	up	1.5027
RPTOR	1.52932e-07	1.28781e-10	1.07491	up	1.07491
H3C1	1.52932e-07	1.19905e-10	-1.67431	down	-1.67431
H4C1	1.52932e-07	1.19905e-10	-1.67431	down	-1.67431
MIR7976	2.56816e-07	2.32894e-10	-1.20931	down	-1.20931
MIR6825	2.56816e-07	2.32894e-10	-1.20931	down	-1.20931
TPRA1	2.56816e-07	2.32894e-10	-1.20931	down	-1.20931
MIR4648	5.84323e-07	5.67745e-10	-1.83063	down	-1.83063
LFNG	5.84323e-07	5.67745e-10	-1.83063	down	-1.83063
FOXD3-AS1	6.70566e-07	7.38413e-10	1.85622	up	1.85622
MIR6068	6.70566e-07	7.38413e-10	1.85622	up	1.85622
FOXD3	6.70566e-07	7.38413e-10	1.85622	up	1.85622
LINC01698	7.31409e-07	8.52789e-10	-2.42688	down	-2.42688
LINC01344	2.2246e-06	2.73789e-09	-2.26948	down	-2.26948
H2AC16	2.75678e-06	3.57143e-09	-1.55	down	-1.55
MIR4789	3.99507e-06	5.43441e-09	-2.05468	down	-2.05468
NAALADL2	3.99507e-06	5.43441e-09	-2.05468	down	-2.05468
ZNF606-AS1	4.01451e-06	5.98094e-09	1.88062	up	1.88062
C19orf18	4.01451e-06	5.98094e-09	1.88062	up	1.88062
ZNF606	4.01451e-06	5.98094e-09	1.88062	up	1.88062
TMEM219	4.72588e-06	7.34687e-09	-1.46893	down	-1.46893
TAOK2	4.72588e-06	7.34687e-09	-1.46893	down	-1.46893
TCERG1	4.97649e-06	8.05883e-09	-1.76808	down	-1.76808
LINC01014	5.65947e-06	9.65495e-09	-2.09202	down	-2.09202
KCNMB2	5.65947e-06	9.65495e-09	-2.09202	down	-2.09202
LOC105371348	5.65947e-06	1.06312e-08	1.44866	up	1.44866
KARS1	5.65947e-06	1.06312e-08	1.44866	up	1.44866
TERF2IP	5.65947e-06	1.06312e-08	1.44866	up	1.44866
CPEB1-AS1	5.88622e-06	1.14384e-08	2.58908	up	2.58908
SMIM10L3	7.65231e-06	1.53661e-08	-2.11924	down	-2.11924
TMEM170B	8.19696e-06	1.69907e-08	-1.40497	down	-1.40497
UQCC4	8.47463e-06	1.81152e-08	2.33257	up	2.33257
KCNMB2-AS1	8.76783e-06	1.93099e-08	-2.09202	down	-2.09202
LOC124906307	8.76783e-06	1.93099e-08	-2.09202	down	-2.09202
LOC124909461	8.76783e-06	1.93099e-08	-2.09202	down	-2.09202
LAT	1.24055e-05	2.8125e-08	1.32392	up	1.32392
SPNS1	1.24055e-05	2.8125e-08	1.32392	up	1.32392
MIR3615	1.34625e-05	3.22623e-08	-1.93765	down	-1.93765
RAB37	1.34625e-05	3.22623e-08	-1.93765	down	-1.93765
LANCL2	1.34625e-05	3.22654e-08	1.116	up	1.116
NHERF1	1.34625e-05	3.22623e-08	-1.93765	down	-1.93765
IL20RB-AS1	1.46798e-05	3.70847e-08	-1.80755	down	-1.80755
NCK1	1.46798e-05	3.70847e-08	-1.80755	down	-1.80755
IL20RB	1.46798e-05	3.70847e-08	-1.80755	down	-1.80755
TMEM38B	1.60437e-05	4.15694e-08	-1.4228	down	-1.4228
LAG3	1.69697e-05	4.5068e-08	-1.87035	down	-1.87035
PTMS	1.69697e-05	4.5068e-08	-1.87035	down	-1.87035
TTC14-DT	1.98531e-05	5.65836e-08	-0.847036	down	-0.847036
TTC14	1.98531e-05	5.65836e-08	-0.847036	down	-0.847036
CCDC39	1.98531e-05	5.65836e-08	-0.847036	down	-0.847036
NR4A2	1.98531e-05	5.54525e-08	-1.54126	down	-1.54126
SDHAF3	2.28137e-05	6.73984e-08	-1.07214	down	-1.07214
API5	2.28137e-05	6.79771e-08	-1.1204	down	-1.1204
NAT16	2.46343e-05	7.49977e-08	-1.86825	down	-1.86825
MLF2	2.74369e-05	8.53072e-08	-1.87035	down	-1.87035
PIK3CA-DT	3.49805e-05	1.18449e-07	-0.937784	down	-0.937784
CEBPG	3.49805e-05	1.20053e-07	1.15765	up	1.15765
PIK3CA	3.49805e-05	1.18449e-07	-0.937784	down	-0.937784
TMEM106B	3.49805e-05	1.14065e-07	-0.898443	down	-0.898443
EIF2AK2	3.49805e-05	1.20091e-07	-1.81408	down	-1.81408
PCNX4-DT	3.72567e-05	1.30319e-07	-0.948002	down	-0.948002
MAPKAPK5-AS1	4.03907e-05	1.46514e-07	1.60862	up	1.60862
MAPKAPK5	4.03907e-05	1.46514e-07	1.60862	up	1.60862
ALG1L1P	4.16473e-05	1.5377e-07	-1.30584	down	-1.30584
GARS1-DT	4.52885e-05	1.70147e-07	-0.977806	down	-0.977806
GGCT	4.52885e-05	1.70147e-07	-0.977806	down	-0.977806
RALBP1	4.55776e-05	1.74186e-07	-0.978351	down	-0.978351
CHD8	4.60976e-05	1.82145e-07	-0.947098	down	-0.947098
RAB2B	4.60976e-05	1.82145e-07	-0.947098	down	-0.947098
TOX4	4.60976e-05	1.82145e-07	-0.947098	down	-0.947098
DROSHA	4.6541e-05	1.89926e-07	-0.935814	down	-0.935814
C5orf22	4.6541e-05	1.89926e-07	-0.935814	down	-0.935814
124903337	4.96205e-05	2.05707e-07	-2.19673	down	-2.19673
ACTN1	4.96205e-05	2.05707e-07	-2.19673	down	-2.19673
ARHGAP26-IT1	5.21138e-05	2.25635e-07	-0.947195	down	-0.947195
ARHGAP26	5.21138e-05	2.25635e-07	-0.947195	down	-0.947195
RIMOC1	5.21138e-05	2.26171e-07	-1.66271	down	-1.66271
PCNX4	5.21138e-05	2.20976e-07	-0.948002	down	-0.948002
RNVU1-8	5.38757e-05	2.37307e-07	1.1216	up	1.1216
LOC124903709	5.57749e-05	2.49286e-07	-1.44483	down	-1.44483
H4C8	5.5999e-05	2.53914e-07	-2.0531	down	-2.0531
PLD1	5.75234e-05	2.6644e-07	-1.45759	down	-1.45759
CUL5	5.75234e-05	2.72005e-07	-1.01457	down	-1.01457
PLA2G4C	5.75234e-05	2.69027e-07	2.37935	up	2.37935
SSBP3	5.78111e-05	2.7711e-07	-1.6478	down	-1.6478
MALINC1	7.10444e-05	3.55032e-07	-1.22175	down	-1.22175
PCAT1	7.10444e-05	3.63551e-07	-1.72349	down	-1.72349
CCAT2	7.10444e-05	3.63551e-07	-1.72349	down	-1.72349
CASC21	7.10444e-05	3.63551e-07	-1.72349	down	-1.72349
LOC124900193	7.10444e-05	3.55032e-07	-1.22175	down	-1.22175
POU5F1B	7.10444e-05	3.63551e-07	-1.72349	down	-1.72349
ZNF19	7.10444e-05	3.56122e-07	-1.44483	down	-1.44483
ZNF23	7.10444e-05	3.56122e-07	-1.44483	down	-1.44483
H2AC11	7.61335e-05	3.94525e-07	-1.81353	down	-1.81353
CDCA7	8.03749e-05	4.21711e-07	-1.79065	down	-1.79065
124900607	9.55409e-05	5.18291e-07	-1.09126	down	-1.09126
PDRG1	9.55409e-05	5.1985e-07	-1.1099	down	-1.1099
LAPTM4A	9.55409e-05	5.18291e-07	-1.09126	down	-1.09126
HFE-AS1	9.91788e-05	5.52492e-07	-1.68914	down	-1.68914
H2AC6	9.91788e-05	5.52492e-07	-1.68914	down	-1.68914
H2BC4	9.91788e-05	5.52492e-07	-1.68914	down	-1.68914
LOC105371354	0.000102289	5.76442e-07	-1.36542	down	-1.36542
LOC107984806	0.000102289	5.76442e-07	-1.36542	down	-1.36542
WWOX	0.000102289	5.76442e-07	-1.36542	down	-1.36542
H3C11	0.000108798	6.20171e-07	-1.34448	down	-1.34448
H4C13	0.000108798	6.20171e-07	-1.34448	down	-1.34448
DYNC1LI2-DT	0.000116353	6.81667e-07	1.2746	up	1.2746
DYNC1LI2	0.000116353	6.81667e-07	1.2746	up	1.2746
MCM10	0.000116353	6.85845e-07	-1.98189	down	-1.98189
LOC105376975	0.000121926	7.26599e-07	-1.45931	down	-1.45931
MBD4	0.000142319	8.57343e-07	-0.970464	down	-0.970464
EFCAB12	0.000142319	8.57343e-07	-0.970464	down	-0.970464
LOC124903705	0.000146073	8.89417e-07	-1.25505	down	-1.25505
SATB1	0.000147595	9.08248e-07	-1.45931	down	-1.45931
TBC1D5	0.000147595	9.08248e-07	-1.45931	down	-1.45931
SMPD3	0.00018874	1.18589e-06	-1.25505	down	-1.25505
H2BC11	0.00018874	1.18101e-06	-1.65895	down	-1.65895
MIR6765	0.000191412	1.21508e-06	1.34141	up	1.34141
NUDT14	0.000191412	1.21508e-06	1.34141	up	1.34141
JAG2	0.000191412	1.21508e-06	1.34141	up	1.34141
PNRC1	0.000192188	1.23246e-06	-1.31281	down	-1.31281
PLSCR1	0.000195352	1.27805e-06	-1.05668	down	-1.05668
MTA3	0.000195352	1.267e-06	1.12847	up	1.12847
MIR3919	0.000195838	1.3066e-06	-1.54287	down	-1.54287
IQCJ-SCHIP1	0.000195838	1.3066e-06	-1.54287	down	-1.54287
SCHIP1	0.000195838	1.3066e-06	-1.54287	down	-1.54287
IQCJ	0.000195838	1.3066e-06	-1.54287	down	-1.54287
TGFBR3L	0.000205573	1.38487e-06	2.01607	up	2.01607
MAP2K7	0.000205573	1.38487e-06	2.01607	up	2.01607
LRRC8E	0.000205573	1.38487e-06	2.01607	up	2.01607
TAMM41	0.000206253	1.40281e-06	-1.57013	down	-1.57013
VGLL4	0.000206253	1.40281e-06	-1.57013	down	-1.57013
TTC8	0.000239671	1.65238e-06	-0.977362	down	-0.977362
EGFR	0.000239671	1.66115e-06	-2.07105	down	-2.07105
MAP3K13	0.000239746	1.67719e-06	-1.52006	down	-1.52006
FARSB	0.000243247	1.71744e-06	-1.10437	down	-1.10437
RAD51-AS1	0.000255236	1.85169e-06	-1.47352	down	-1.47352
LOC124902695	0.000255236	1.85106e-06	0.964449	up	0.964449
KDM2A	0.000255236	1.85106e-06	0.964449	up	0.964449
RAD51	0.000255236	1.85169e-06	-1.47352	down	-1.47352
GTF3C6	0.000257777	1.88682e-06	1.26307	up	1.26307
IFT122	0.000266352	1.96685e-06	-0.970464	down	-0.970464
MIR4690	0.000271709	2.0592e-06	1.61776	up	1.61776
KCNK7	0.000271709	2.0592e-06	1.61776	up	1.61776
PCNX3	0.000271709	2.0592e-06	1.61776	up	1.61776
MIR106B	0.000271709	2.02942e-06	-1.1875	down	-1.1875
MIR25	0.000271709	2.02942e-06	-1.1875	down	-1.1875
MIR93	0.000271709	2.02942e-06	-1.1875	down	-1.1875
MCM7	0.000271709	2.02942e-06	-1.1875	down	-1.1875
MAP3K11	0.000271709	2.0592e-06	1.61776	up	1.61776
SIPA1	0.000271709	2.0592e-06	1.61776	up	1.61776
AP4M1	0.000289086	2.22582e-06	-1.1875	down	-1.1875
ZBTB40	0.000289086	2.22835e-06	1.45833	up	1.45833
HFE-AS1	0.000296159	2.30205e-06	-1.68914	down	-1.68914
H1-6	0.000296159	2.30205e-06	-1.68914	down	-1.68914
H2BC4	0.000296159	2.30205e-06	-1.68914	down	-1.68914
TMEM18-DT	0.000298482	2.35878e-06	-1.30653	down	-1.30653
TMEM18	0.000298482	2.35878e-06	-1.30653	down	-1.30653
LINC02767	0.00030027	2.43125e-06	-1.45224	down	-1.45224
CASP16P	0.00030027	2.4266e-06	2.02181	up	2.02181
ATRNL1	0.00030027	2.39797e-06	1.37194	up	1.37194
ZNF213	0.00030027	2.4266e-06	2.02181	up	2.02181
NCS1	0.000301265	2.45883e-06	-1.99959	down	-1.99959
ARL4A	0.000303142	2.5513e-06	-1.24501	down	-1.24501
LINC00957	0.000303142	2.5696e-06	-1.33325	down	-1.33325
FBXO5	0.000303142	2.52339e-06	-1.42801	down	-1.42801
DBNL	0.000303142	2.5696e-06	-1.33325	down	-1.33325
MTNAP1	0.000303142	2.59196e-06	-1.03953	down	-1.03953
LTBP4	0.000303142	2.50559e-06	-1.85646	down	-1.85646
VCF1	0.000303142	2.59196e-06	-1.03953	down	-1.03953
SHKBP1	0.000303142	2.50559e-06	-1.85646	down	-1.85646
ZDHHC1	0.000307992	2.65338e-06	1.08528	up	1.08528
TPPP3	0.000307992	2.65338e-06	1.08528	up	1.08528
MIR3181	0.000308775	2.68013e-06	-0.93244	down	-0.93244
CYLD	0.000308775	2.68013e-06	-0.93244	down	-0.93244
PCAT1	0.000311806	2.72663e-06	-1.72349	down	-1.72349
CCAT2	0.000311806	2.72663e-06	-1.72349	down	-1.72349
CASC21	0.000311806	2.72663e-06	-1.72349	down	-1.72349
LOC105375751	0.000311806	2.72663e-06	-1.72349	down	-1.72349
POU5F1B	0.000311806	2.72663e-06	-1.72349	down	-1.72349
LOC107986465	0.000317538	2.85903e-06	-0.790885	down	-0.790885
FAM114A2	0.000317538	2.85903e-06	-0.790885	down	-0.790885
MCM3	0.000317538	2.82878e-06	-1.28321	down	-1.28321
MFAP3	0.000317538	2.85903e-06	-0.790885	down	-0.790885
H4C3	0.000317538	2.8145e-06	-1.65183	down	-1.65183
SCRN2	0.000318249	2.88605e-06	1.07007	up	1.07007
GGACT	0.00033275	3.0391e-06	-1.89193	down	-1.89193
SENP2	0.00033577	3.08844e-06	0.826353	up	0.826353
LOC124902695	0.000340631	3.15522e-06	0.964449	up	0.964449
KDM2A	0.000340631	3.15522e-06	0.964449	up	0.964449
SLC22A8	0.000347616	3.24244e-06	-1.68953	down	-1.68953
MYL12B	0.000350143	3.35673e-06	1.18844	up	1.18844
MYL12-AS1	0.000350143	3.35673e-06	1.18844	up	1.18844
ORC3	0.000350143	3.32567e-06	-0.905684	down	-0.905684
RARS2	0.000350143	3.32567e-06	-0.905684	down	-0.905684
TENT4A	0.00035265	3.4036e-06	-0.84392	down	-0.84392
MIR3181	0.00036535	3.57351e-06	-0.93244	down	-0.93244
CYLD-AS1	0.00036535	3.57351e-06	-0.93244	down	-0.93244
CYLD	0.00036535	3.57351e-06	-0.93244	down	-0.93244
TRIM2	0.000366709	3.61056e-06	-1.39173	down	-1.39173
MND1	0.000366709	3.61056e-06	-1.39173	down	-1.39173
NUP155	0.00038099	3.77584e-06	-1.59989	down	-1.59989
NDUFB5	0.000393245	3.94824e-06	-0.740207	down	-0.740207
MRPL47	0.000393245	3.94824e-06	-0.740207	down	-0.740207
USP13	0.000393245	3.94824e-06	-0.740207	down	-0.740207
LOC101928236	0.000403445	4.07679e-06	-1.01303	down	-1.01303
ERCC4	0.000418751	4.2857e-06	1.60968	up	1.60968
BRWD1	0.000418751	4.28407e-06	-1.64412	down	-1.64412
PSMG1	0.000418751	4.28407e-06	-1.64412	down	-1.64412
PEG10	0.000422916	4.38312e-06	-0.848378	down	-0.848378
SGCE	0.000422916	4.38312e-06	-0.848378	down	-0.848378
C3orf80	0.000427692	4.46032e-06	-1.53458	down	-1.53458
SAP30BP	0.000436986	4.58999e-06	-1.52682	down	-1.52682
C2CD2L	0.000436986	4.61386e-06	-1.0722	down	-1.0722
CNGA4	0.000475555	5.1135e-06	-1.60134	down	-1.60134
MAMDC4	0.000475555	5.08509e-06	1.79959	up	1.79959
PHPT1	0.000475555	5.08509e-06	1.79959	up	1.79959
AJM1	0.000475555	5.08509e-06	1.79959	up	1.79959
FHIP1B	0.000475555	5.1135e-06	-1.60134	down	-1.60134
BRD1	0.000484835	5.27609e-06	0.92333	up	0.92333
CASC8	0.000484835	5.27149e-06	-1.72349	down	-1.72349
GIGYF2	0.000502782	5.50396e-06	0.795952	up	0.795952
SNORC	0.000502782	5.50396e-06	0.795952	up	0.795952
LINC02875	0.000503855	5.54927e-06	0.942141	up	0.942141
FIGNL1	0.000503855	5.58099e-06	-1.20511	down	-1.20511
TBX2	0.000503855	5.54927e-06	0.942141	up	0.942141
RPL37	0.000520857	5.80305e-06	-0.829588	down	-0.829588
SNORD72	0.000520857	5.80305e-06	-0.829588	down	-0.829588
MARCHF7	0.000526421	5.89913e-06	1.13107	up	1.13107
RBX1	0.000541764	6.10617e-06	2.0355	up	2.0355
OTUD6B-AS1	0.000543681	6.1982e-06	-0.86821	down	-0.86821
OTUD6B	0.000543681	6.1982e-06	-0.86821	down	-0.86821
RPL37	0.000552157	6.3306e-06	-0.829588	down	-0.829588
SNORD72	0.000552157	6.3306e-06	-0.829588	down	-0.829588
CEBPB-AS1	0.000555837	6.55282e-06	2.00894	up	2.00894
TRIM2	0.000555837	6.44742e-06	-1.39173	down	-1.39173
KCTD16	0.000555837	6.54525e-06	-1.08504	down	-1.08504
USP1	0.000555837	6.53771e-06	-0.953529	down	-0.953529
YIPF5	0.000555837	6.54525e-06	-1.08504	down	-1.08504
MND1	0.000555837	6.44742e-06	-1.39173	down	-1.39173
NAA35	0.000604641	7.16733e-06	1.69737	up	1.69737
LOC101927855	0.000608856	7.25674e-06	0.942141	up	0.942141
TBX2-AS1	0.000608856	7.25674e-06	0.942141	up	0.942141
FBXO4	0.000615809	7.3795e-06	-0.751646	down	-0.751646
LOC101928463	0.000621145	7.59413e-06	-1.18262	down	-1.18262
GADD45A	0.000621145	7.57723e-06	-1.07968	down	-1.07968
STMND1	0.000621145	7.59413e-06	-1.18262	down	-1.18262
BCKDHB	0.000621145	7.60438e-06	-1.17287	down	-1.17287
EFS	0.000622785	7.78907e-06	0.824909	up	0.824909
NAXD-AS1	0.000622785	7.82616e-06	-0.910396	down	-0.910396
DPAGT1	0.000622785	7.79229e-06	-1.0722	down	-1.0722
H2AX	0.000622785	7.79229e-06	-1.0722	down	-1.0722
NAXD	0.000622785	7.82616e-06	-0.910396	down	-0.910396
AP3D1	0.000622785	7.70178e-06	1.05132	up	1.05132
MAMDC4	0.000637422	8.05139e-06	1.79959	up	1.79959
PHPT1	0.000637422	8.05139e-06	1.79959	up	1.79959
AJM1	0.000637422	8.05139e-06	1.79959	up	1.79959
RABL6	0.000637422	8.05139e-06	1.79959	up	1.79959
ZXDB	0.000643923	8.17521e-06	0.760947	up	0.760947
STX16-NPEPL1	0.000663722	8.46957e-06	1.22246	up	1.22246
LOC124904942	0.000663722	8.46957e-06	1.22246	up	1.22246
NPEPL1	0.000663722	8.46957e-06	1.22246	up	1.22246
TRIM59-IFT80	0.000668788	8.57754e-06	-1.53458	down	-1.53458
IL12A-AS1	0.000668788	8.57754e-06	-1.53458	down	-1.53458
MAMDC4	0.000706795	9.11079e-06	1.79959	up	1.79959
PHPT1	0.000706795	9.11079e-06	1.79959	up	1.79959
AJM1	0.000706795	9.11079e-06	1.79959	up	1.79959
ATL3	0.000717801	9.29915e-06	1.14048	up	1.14048
H2BC3	0.000722783	9.45732e-06	-1.80153	down	-1.80153
H3C3	0.000722783	9.45732e-06	-1.80153	down	-1.80153
GRIN3B	0.00073127	9.61574e-06	1.06286	up	1.06286
WDR18	0.00073127	9.61574e-06	1.06286	up	1.06286
NRIR	0.000735996	9.77323e-06	-1.04827	down	-1.04827
CMPK2	0.000735996	9.77323e-06	-1.04827	down	-1.04827
RSAD2	0.000735996	9.77323e-06	-1.04827	down	-1.04827
H1-10-AS1	0.000737001	9.88206e-06	1.51076	up	1.51076
H1-10	0.000737001	9.88206e-06	1.51076	up	1.51076
NUTF2	0.000765558	1.0315e-05	1.89039	up	1.89039
LOC124909464	0.000765558	1.03641e-05	-0.740207	down	-0.740207
EDC4	0.000765558	1.0315e-05	1.89039	up	1.89039
NDUFB5	0.000765558	1.03641e-05	-0.740207	down	-0.740207
THAP11	0.000765558	1.0315e-05	1.89039	up	1.89039
USP13	0.000765558	1.03641e-05	-0.740207	down	-0.740207
FMNL3	0.000767338	1.04379e-05	1.66375	up	1.66375
MROH7-TTC4	0.000773205	1.05678e-05	-0.894262	down	-0.894262
ACOT11	0.000773205	1.05678e-05	-0.894262	down	-0.894262
MROH7	0.000773205	1.05678e-05	-0.894262	down	-0.894262
ATP9A	0.000791275	1.10198e-05	1.58639	up	1.58639
BUD23	0.000791275	1.09775e-05	1.03271	up	1.03271
TCOF1	0.000791275	1.09793e-05	-0.873809	down	-0.873809
DNAJC30	0.000791275	1.09775e-05	1.03271	up	1.03271
NAB2	0.00081937	1.14642e-05	-1.16598	down	-1.16598
ARL8B	0.000823084	1.15694e-05	-1.03549	down	-1.03549
SLC1A5	0.000826235	1.16673e-05	2.0188	up	2.0188
PRSS36	0.000827262	1.17354e-05	-1.03978	down	-1.03978
LOC107985075	0.00084662	1.20648e-05	1.75661	up	1.75661
DDX18	0.000850402	1.21738e-05	-1.5665	down	-1.5665
MCL1	0.000858404	1.23439e-05	1.33969	up	1.33969
ADAMTSL4-AS1	0.000858404	1.23439e-05	1.33969	up	1.33969
BAZ2B	0.000867828	1.25357e-05	1.13107	up	1.13107
PLPBP	0.000877316	1.27864e-05	1.05211	up	1.05211
RAPGEF1	0.000877316	1.278e-05	-1.63121	down	-1.63121
PSMD2	0.000882802	1.29235e-05	-0.71441	down	-0.71441
REM2	0.000918573	1.35067e-05	0.840108	up	0.840108
LRP10	0.000918573	1.35067e-05	0.840108	up	0.840108
RNF26	0.000928202	1.37084e-05	1.59835	up	1.59835
NRG1-IT1	0.000939008	1.39288e-05	-1.41598	down	-1.41598
NRG1-IT3	0.000939008	1.39288e-05	-1.41598	down	-1.41598
LOC128092250	0.000939008	1.39288e-05	-1.41598	down	-1.41598
NRG1	0.000939008	1.39288e-05	-1.41598	down	-1.41598
STX16-NPEPL1	0.000947487	1.41159e-05	1.22246	up	1.22246
LOC124904942	0.000947487	1.41159e-05	1.22246	up	1.22246
NPEPL1	0.000947487	1.41159e-05	1.22246	up	1.22246
STX16	0.000947487	1.41159e-05	1.22246	up	1.22246
LOC100996660	0.000963874	1.44225e-05	-0.916706	down	-0.916706
DPYSL2	0.00100372	1.50837e-05	-1.29869	down	-1.29869
LOC107986776	0.00100394	1.51702e-05	-0.854693	down	-0.854693
ALOX12B	0.00100394	1.52821e-05	1.75661	up	1.75661
HYCC1	0.00100394	1.51702e-05	-0.854693	down	-0.854693
FADD	0.00100394	1.52617e-05	-1.74945	down	-1.74945
RPA3	0.00101001	1.54399e-05	-0.851906	down	-0.851906
MIR548AQ	0.00101121	1.55239e-05	-1.57505	down	-1.57505
IGF2BP2	0.00101121	1.55239e-05	-1.57505	down	-1.57505
DCXR-DT	0.00105185	1.64394e-05	1.47532	up	1.47532
LOC124905321	0.00105185	1.63071e-05	1.57176	up	1.57176
NEMP1	0.00105185	1.6432e-05	-1.16598	down	-1.16598
DCXR	0.00105185	1.64394e-05	1.47532	up	1.47532
SERPINB9	0.00105185	1.64884e-05	1.68657	up	1.68657
LOC124900933	0.00107394	1.69043e-05	-0.89127	down	-0.89127
C2orf49	0.0010793	1.70586e-05	-1.10182	down	-1.10182
PKN1	0.00109001	1.72983e-05	1.5945	up	1.5945
CLASRP	0.00112067	1.78576e-05	1.69852	up	1.69852
RELB	0.00112067	1.78576e-05	1.69852	up	1.69852
SPRYD3	0.0011391	1.8225e-05	1.32303	up	1.32303
YIPF2	0.00117907	1.90173e-05	1.27668	up	1.27668
TIMM29	0.00117907	1.90173e-05	1.27668	up	1.27668
CBY1	0.00120241	1.96274e-05	1.35114	up	1.35114
RFC3	0.00120241	1.9576e-05	-1.66977	down	-1.66977
FAM227A	0.00120241	1.96274e-05	1.35114	up	1.35114
DDX28	0.00121973	1.99892e-05	1.22791	up	1.22791
LRRC23	0.00124881	2.07929e-05	1.36728	up	1.36728
DNAJC4	0.00124881	2.08221e-05	1.02972	up	1.02972
PML	0.00124881	2.08702e-05	-1.48649	down	-1.48649
TPI1	0.00124881	2.07929e-05	1.36728	up	1.36728
VEGFB	0.00124881	2.08221e-05	1.02972	up	1.02972
USP5	0.00124881	2.07929e-05	1.36728	up	1.36728
CHCHD6	0.00124881	2.07555e-05	-1.68921	down	-1.68921
NUDT22	0.00124881	2.08221e-05	1.02972	up	1.02972
STOML1	0.00124881	2.08702e-05	-1.48649	down	-1.48649
MIR4428	0.00125838	2.12494e-05	-1.50354	down	-1.50354
RALGAPA1P1	0.00125838	2.1343e-05	-1.08265	down	-1.08265
RFC2	0.00125838	2.11427e-05	-0.882534	down	-0.882534
RYR2	0.00125838	2.12494e-05	-1.50354	down	-1.50354
H4C2	0.00125838	2.13562e-05	-1.6776	down	-1.6776
FSD1L	0.00125838	2.1343e-05	-1.08265	down	-1.08265
GABARAP	0.00126452	2.15422e-05	1.31578	up	1.31578
CLDN7	0.00126452	2.15422e-05	1.31578	up	1.31578
CTDNEP1	0.00126452	2.15422e-05	1.31578	up	1.31578
MIR1537	0.00129663	2.21906e-05	-0.894425	down	-0.894425
LYST	0.00129663	2.21906e-05	-0.894425	down	-0.894425
CAMK2B	0.00129663	2.22572e-05	-1.24623	down	-1.24623
SEH1L	0.00131398	2.26401e-05	-0.926916	down	-0.926916
DCAF8-DT	0.00133792	2.33126e-05	1.21737	up	1.21737
NFATC3	0.00133792	2.31874e-05	1.22791	up	1.22791
DUS2	0.00133792	2.31874e-05	1.22791	up	1.22791
CENPT	0.00133792	2.32919e-05	1.89039	up	1.89039
SLC39A2	0.00137222	2.39992e-05	-1.11886	down	-1.11886
METTL17	0.00137222	2.39992e-05	-1.11886	down	-1.11886
LOC124902827	0.00140496	2.46629e-05	1.84903	up	1.84903
WEE1	0.00140496	2.46629e-05	1.84903	up	1.84903
NBN	0.00140796	2.48881e-05	-0.855635	down	-0.855635
CCND1	0.00140796	2.48979e-05	1.86538	up	1.86538
KIF1C	0.00142477	2.53797e-05	1.28268	up	1.28268
CAMTA2	0.00142477	2.53797e-05	1.28268	up	1.28268
INCA1	0.00142477	2.53797e-05	1.28268	up	1.28268
RAP2B	0.00143455	2.56469e-05	-1.22942	down	-1.22942
PRCC	0.00144024	2.58418e-05	0.942239	up	0.942239
LRRCC1	0.00145335	2.61713e-05	-1.58533	down	-1.58533
C19orf73	0.00145754	2.6341e-05	1.85699	up	1.85699
MIOS-DT	0.00145902	2.67552e-05	-0.731812	down	-0.731812
LOC124902929	0.00145902	2.68404e-05	1.66375	up	1.66375
RASA4CP	0.00145902	2.65525e-05	-1.33325	down	-1.33325
MIOS	0.00145902	2.67552e-05	-0.731812	down	-0.731812
TMBIM6	0.00145902	2.68404e-05	1.66375	up	1.66375
H3C11	0.00145902	2.66182e-05	-1.53088	down	-1.53088
H4C13	0.00145902	2.66182e-05	-1.53088	down	-1.53088
POLR2J4	0.00145902	2.65525e-05	-1.33325	down	-1.33325
LOC124902687	0.00150387	2.77628e-05	1.02972	up	1.02972
TRPT1	0.00150387	2.77628e-05	1.02972	up	1.02972
ZMYM2	0.00152406	2.82343e-05	1.88446	up	1.88446
VAMP9P	0.00153514	2.88374e-05	-1.15765	down	-1.15765
GLCCI1	0.00153514	2.85639e-05	-0.851906	down	-0.851906
BTBD3	0.00153514	2.87446e-05	-1.17812	down	-1.17812
ARHGAP35	0.00153514	2.87479e-05	-1.30231	down	-1.30231
UMAD1	0.00153514	2.85639e-05	-0.851906	down	-0.851906
MIR103A1	0.00155658	2.93409e-05	-1.018	down	-1.018
PANK3	0.00155658	2.93409e-05	-1.018	down	-1.018
TRIM59-IFT80	0.00157048	2.99487e-05	-0.918278	down	-0.918278
LOC105374591	0.00157048	2.99979e-05	-1.51225	down	-1.51225
LOC105374593	0.00157048	2.99979e-05	-1.51225	down	-1.51225
LOC124907766	0.00157048	2.99979e-05	-1.51225	down	-1.51225
TRIM59	0.00157048	2.99487e-05	-0.918278	down	-0.918278
HDGF	0.00157048	3.00099e-05	0.942239	up	0.942239
FOXN2	0.00157048	2.99979e-05	-1.51225	down	-1.51225
MRPL24	0.00157048	3.00099e-05	0.942239	up	0.942239
LINC00887	0.00157799	3.02555e-05	-1.23976	down	-1.23976
TAF3	0.00159045	3.05975e-05	-0.984187	down	-0.984187
SNORD4B	0.00160333	3.09491e-05	1.19544	up	1.19544
SNORD4A	0.00160333	3.09491e-05	1.19544	up	1.19544
SNORD42B	0.00160333	3.09491e-05	1.19544	up	1.19544
SNORD42A	0.00160333	3.09491e-05	1.19544	up	1.19544
NEK8	0.00160333	3.09491e-05	1.19544	up	1.19544
RPL23A	0.00160333	3.09491e-05	1.19544	up	1.19544
SCIRT	0.00163871	3.18443e-05	-1.01347	down	-1.01347
LOC124901321	0.00163871	3.18443e-05	-1.01347	down	-1.01347
LINC03040	0.00163871	3.18443e-05	-1.01347	down	-1.01347
KIFAP3	0.00165412	3.22509e-05	-0.771449	down	-0.771449
PROCA1	0.0016725	3.27177e-05	1.19544	up	1.19544
RAB34	0.0016725	3.27177e-05	1.19544	up	1.19544
INSIG2	0.00170604	3.34842e-05	-1.25875	down	-1.25875
CPLX2	0.00172029	3.39869e-05	-1.50377	down	-1.50377
MRPL2	0.00172029	3.39413e-05	1.55009	up	1.55009
CUL7	0.00172029	3.39413e-05	1.55009	up	1.55009
PSMC3	0.00172292	3.41504e-05	1.90146	up	1.90146
LOC105377033	0.00178046	3.5723e-05	-0.726736	down	-0.726736
GNG7	0.00178046	3.56384e-05	1.40582	up	1.40582
ACAA1	0.00178046	3.5723e-05	-0.726736	down	-0.726736
ARHGDIA	0.00178046	3.58006e-05	0.734579	up	0.734579
MYD88	0.00178046	3.5723e-05	-0.726736	down	-0.726736
TM2D2	0.00178046	3.58675e-05	-1.48737	down	-1.48737
SNORD4A	0.0018059	3.6497e-05	1.29821	up	1.29821
SNORD42B	0.0018059	3.6497e-05	1.29821	up	1.29821
SNORD42A	0.0018059	3.6497e-05	1.29821	up	1.29821
RPL23A	0.0018059	3.6497e-05	1.29821	up	1.29821
AP3M2	0.00181527	3.68039e-05	-1.18224	down	-1.18224
DTWD2	0.00183922	3.7623e-05	-1.20203	down	-1.20203
OAZ3	0.00183922	3.77662e-05	0.969986	up	0.969986
MRPL9	0.00183922	3.77662e-05	0.969986	up	0.969986
H2AC4	0.00183922	3.75855e-05	-1.46597	down	-1.46597
H3C2	0.00183922	3.75855e-05	-1.46597	down	-1.46597
PSMB6	0.00184627	3.80305e-05	1.43033	up	1.43033
LOC107985278	0.00185221	3.82728e-05	1.15232	up	1.15232
MKNK2	0.00185221	3.82728e-05	1.15232	up	1.15232
CCAR1	0.00185316	3.84124e-05	1.13777	up	1.13777
SNORD98	0.00185316	3.84124e-05	1.13777	up	1.13777
RASA4DP	0.00188384	3.92924e-05	-0.795593	down	-0.795593
FAM185A	0.00188384	3.92924e-05	-0.795593	down	-0.795593
C1orf116	0.00195039	4.08068e-05	-1.5609	down	-1.5609
CCDC102A	0.00195219	4.09711e-05	1.09353	up	1.09353
LOC105374591	0.00195329	4.12472e-05	-1.51225	down	-1.51225
LOC105374593	0.00195329	4.12472e-05	-1.51225	down	-1.51225
LOC124907766	0.00195329	4.12472e-05	-1.51225	down	-1.51225
SNORD82	0.00195412	4.13912e-05	-0.998569	down	-0.998569
NCL	0.00195412	4.13912e-05	-0.998569	down	-0.998569
SNORD20	0.00195412	4.13912e-05	-0.998569	down	-0.998569
SNORA75	0.00195412	4.13912e-05	-0.998569	down	-0.998569
DNAJC4	0.00196007	4.16441e-05	1.02972	up	1.02972
FERMT3	0.00196007	4.16441e-05	1.02972	up	1.02972
NUDT22	0.00196007	4.16441e-05	1.02972	up	1.02972
LOC124901007	0.00198088	4.25902e-05	-1.14922	down	-1.14922
SAMD4A	0.00198088	4.24394e-05	1.3122	up	1.3122
HMGCR	0.00198088	4.25902e-05	-1.14922	down	-1.14922
TEX21P	0.00198088	4.27279e-05	-1.22113	down	-1.22113
MTHFD1	0.00198088	4.27279e-05	-1.22113	down	-1.22113
AKAP5	0.00198088	4.27279e-05	-1.22113	down	-1.22113
HRG-AS1	0.0020011	4.32937e-05	-1.30611	down	-1.30611
LIN7B	0.00200759	4.3564e-05	1.85699	up	1.85699
PPFIA3	0.00200759	4.3564e-05	1.85699	up	1.85699
ACIN1	0.00201726	4.39046e-05	1.48713	up	1.48713
CDH24	0.00201726	4.39046e-05	1.48713	up	1.48713
SLC28A2-AS1	0.00201906	4.40746e-05	-0.828112	down	-0.828112
COPA	0.00205253	4.5071e-05	1.21737	up	1.21737
DCAF8	0.00205253	4.5071e-05	1.21737	up	1.21737
PEX19	0.00205253	4.5071e-05	1.21737	up	1.21737
PPP1R14B-AS1	0.00205907	4.56148e-05	1.48768	up	1.48768
LOC105374174	0.00205907	4.5386e-05	-0.87913	down	-0.87913
LOC114841035	0.00205907	4.56148e-05	1.48768	up	1.48768
FKBP2	0.00205907	4.56148e-05	1.48768	up	1.48768
PPP1R14B	0.00205907	4.56148e-05	1.48768	up	1.48768
TSPAN1	0.00208529	4.71709e-05	-1.67901	down	-1.67901
ZMYND11	0.00208529	4.72763e-05	0.944134	up	0.944134
LOC124903349	0.00208529	4.677e-05	-1.25452	down	-1.25452
TMEM167A	0.00208529	4.71198e-05	-1.01555	down	-1.01555
ADSS2	0.00208529	4.66715e-05	-1.12795	down	-1.12795
APPL1	0.00208529	4.68072e-05	-1.03276	down	-1.03276
SCARNA18	0.00208529	4.71198e-05	-1.01555	down	-1.01555
XRCC4	0.00208529	4.71198e-05	-1.01555	down	-1.01555
HESX1	0.00208529	4.68072e-05	-1.03276	down	-1.03276
EXOSC2	0.00210816	4.79313e-05	-0.864317	down	-0.864317
NDUFB4	0.00213846	4.87792e-05	-0.67189	down	-0.67189
IGF2BP2-AS1	0.00213846	4.88972e-05	-1.17484	down	-1.17484
MCL1	0.00219786	5.03979e-05	1.98988	up	1.98988
ADAMTSL4-AS1	0.00219786	5.03979e-05	1.98988	up	1.98988
SENP3-EIF4A1	0.00220021	5.05943e-05	1.55182	up	1.55182
EIF4A1	0.00220021	5.05943e-05	1.55182	up	1.55182
SENP3	0.00220021	5.05943e-05	1.55182	up	1.55182
TNFSF12-TNFSF13	0.00220021	5.05943e-05	1.55182	up	1.55182
SNORA48	0.00220021	5.05943e-05	1.55182	up	1.55182
TNFSF13	0.00220021	5.05943e-05	1.55182	up	1.55182
LOC124903189	0.00220603	5.0871e-05	-1.23719	down	-1.23719
MIR17	0.00220603	5.0871e-05	-1.23719	down	-1.23719
MIR18A	0.00220603	5.0871e-05	-1.23719	down	-1.23719
MIR19A	0.00220603	5.0871e-05	-1.23719	down	-1.23719
MIR19B1	0.00220603	5.0871e-05	-1.23719	down	-1.23719
MIR20A	0.00220603	5.0871e-05	-1.23719	down	-1.23719
MIR92A1	0.00220603	5.0871e-05	-1.23719	down	-1.23719
MIR17HG	0.00220603	5.0871e-05	-1.23719	down	-1.23719
MNS1	0.00224917	5.20116e-05	-1.3388	down	-1.3388
LOC105371083	0.00225922	5.32694e-05	-0.893142	down	-0.893142
LOC124903189	0.00225922	5.34146e-05	-1.23719	down	-1.23719
NHLRC2	0.00225922	5.29016e-05	1.04351	up	1.04351
PINLYP	0.00225922	5.30964e-05	-0.816618	mixed	-0.816618
MIR17	0.00225922	5.34146e-05	-1.23719	down	-1.23719
MIR18A	0.00225922	5.34146e-05	-1.23719	down	-1.23719
MIR19A	0.00225922	5.34146e-05	-1.23719	down	-1.23719
MIR19B1	0.00225922	5.34146e-05	-1.23719	down	-1.23719
MIR20A	0.00225922	5.34146e-05	-1.23719	down	-1.23719
MIR92A1	0.00225922	5.34146e-05	-1.23719	down	-1.23719
MIR17HG	0.00225922	5.34146e-05	-1.23719	down	-1.23719
BAD	0.00225922	5.32673e-05	1.369	up	1.369
INIP	0.00225922	5.26454e-05	-0.969691	down	-0.969691
NAPA	0.00225922	5.29608e-05	1.54065	up	1.54065
DCLRE1A	0.00225922	5.29016e-05	1.04351	up	1.04351
LINC00963	0.00233405	5.53584e-05	1.10756	up	1.10756
LOC124900275	0.00233405	5.53584e-05	1.10756	up	1.10756
TMEM63C	0.00233405	5.54863e-05	-1.5101	down	-1.5101
CIPC	0.00233405	5.54863e-05	-1.5101	down	-1.5101
LOC124903189	0.0023475	5.59581e-05	-1.23719	down	-1.23719
MIR17	0.0023475	5.59581e-05	-1.23719	down	-1.23719
MIR18A	0.0023475	5.59581e-05	-1.23719	down	-1.23719
MIR19A	0.0023475	5.59581e-05	-1.23719	down	-1.23719
MIR19B1	0.0023475	5.59581e-05	-1.23719	down	-1.23719
MIR20A	0.0023475	5.59581e-05	-1.23719	down	-1.23719
MIR92A1	0.0023475	5.59581e-05	-1.23719	down	-1.23719
MIR17HG	0.0023475	5.59581e-05	-1.23719	down	-1.23719
LOC105377697	0.00235221	5.65274e-05	-1.03735	down	-1.03735
LOC105377698	0.00235221	5.65274e-05	-1.03735	down	-1.03735
LOC105377700	0.00235221	5.65274e-05	-1.03735	down	-1.03735
CCNG1	0.00235221	5.65274e-05	-1.03735	down	-1.03735
AAMP	0.00239071	5.76075e-05	-1.0719	down	-1.0719
LOC105374116	0.00239875	5.84227e-05	-0.694283	down	-0.694283
CATSPERE	0.00239875	5.83394e-05	-1.12795	down	-1.12795
STEAP2	0.00239875	5.82825e-05	-0.840317	down	-0.840317
STEAP1	0.00239875	5.82825e-05	-0.840317	down	-0.840317
SRPRB	0.00239875	5.84227e-05	-0.694283	down	-0.694283
TF	0.00239875	5.84227e-05	-0.694283	down	-0.694283
LOC101927045	0.00242578	6.00238e-05	-0.944109	down	-0.944109
KCNK4-CATSPERZ	0.00242578	5.97898e-05	1.369	up	1.369
GABARAP	0.00242578	5.95666e-05	1.93834	up	1.93834
DVL2	0.00242578	5.95666e-05	1.93834	up	1.93834
KHNYN	0.00242578	6.00238e-05	-0.944109	down	-0.944109
NDUFA4	0.00242578	5.97257e-05	-0.691213	down	-0.691213
KCNK4	0.00242578	5.97898e-05	1.369	up	1.369
PLCB3	0.00242578	5.97898e-05	1.369	up	1.369
GPR137	0.00242578	5.97898e-05	1.369	up	1.369
CBLN3	0.00242578	6.00238e-05	-0.944109	down	-0.944109
PHF23	0.00242578	5.95666e-05	1.93834	up	1.93834
PHC3	0.00242578	5.92835e-05	0.689992	up	0.689992
CRYGS	0.00243373	6.08512e-05	1.09883	up	1.09883
TCP11L2	0.00243373	6.06577e-05	1.39706	up	1.39706
C3orf33	0.00243373	6.05147e-05	-0.87913	down	-0.87913
DNAJB11	0.00243373	6.08512e-05	1.09883	up	1.09883
TBCCD1	0.00243373	6.08512e-05	1.09883	up	1.09883
SLC33A1	0.00243373	6.05147e-05	-0.87913	down	-0.87913
PRORP-PSMA6	0.00244641	6.14852e-05	-0.859254	down	-0.859254
PPP2R3C	0.00244641	6.14852e-05	-0.859254	down	-0.859254
PSMA6	0.00244641	6.14852e-05	-0.859254	down	-0.859254
PRORP	0.00244641	6.14852e-05	-0.859254	down	-0.859254
TRIM68	0.00245848	6.20694e-05	-1.15678	down	-1.15678
YWHAG	0.00245848	6.21071e-05	-1.0513	down	-1.0513
KRT15	0.00256746	6.53589e-05	1.13261	up	1.13261
KRT19	0.00256746	6.53589e-05	1.13261	up	1.13261
ENOPH1	0.00256746	6.52375e-05	-1.5439	down	-1.5439
HNRNPDL	0.00256746	6.52375e-05	-1.5439	down	-1.5439
MRPL2	0.00257506	6.5886e-05	1.55009	up	1.55009
PTK7	0.00257506	6.5886e-05	1.55009	up	1.55009
KLC4	0.00257506	6.5886e-05	1.55009	up	1.55009
CUL7	0.00257506	6.5886e-05	1.55009	up	1.55009
LOC124903189	0.00257726	6.61323e-05	-1.23719	down	-1.23719
SLC25A53	0.00257726	6.64432e-05	-0.977671	down	-0.977671
MIR17	0.00257726	6.61323e-05	-1.23719	down	-1.23719
MIR18A	0.00257726	6.61323e-05	-1.23719	down	-1.23719
MIR19A	0.00257726	6.61323e-05	-1.23719	down	-1.23719
MIR19B1	0.00257726	6.61323e-05	-1.23719	down	-1.23719
MIR20A	0.00257726	6.61323e-05	-1.23719	down	-1.23719
MIR92A1	0.00257726	6.61323e-05	-1.23719	down	-1.23719
MIR17HG	0.00257726	6.61323e-05	-1.23719	down	-1.23719
MIR551B	0.00257726	6.6338e-05	-0.738287	down	-0.738287
EGFEM1P	0.00257726	6.6338e-05	-0.738287	down	-0.738287
ZNF777	0.00267746	6.91998e-05	1.07481	up	1.07481
ATXN2L	0.00268296	6.95157e-05	0.879745	up	0.879745
MIR3662	0.00269255	7.02875e-05	-1.03094	down	-1.03094
HBS1L	0.00269255	7.02875e-05	-1.03094	down	-1.03094
LOC124901405	0.00269255	7.02875e-05	-1.03094	down	-1.03094
ZFP36	0.00269255	7.00302e-05	1.33631	up	1.33631
LOC124903189	0.0027215	7.12194e-05	-1.23719	down	-1.23719
MIR17	0.0027215	7.12194e-05	-1.23719	down	-1.23719
MIR18A	0.0027215	7.12194e-05	-1.23719	down	-1.23719
MIR19A	0.0027215	7.12194e-05	-1.23719	down	-1.23719
MIR19B1	0.0027215	7.12194e-05	-1.23719	down	-1.23719
MIR20A	0.0027215	7.12194e-05	-1.23719	down	-1.23719
MIR92A1	0.0027215	7.12194e-05	-1.23719	down	-1.23719
MIR17HG	0.0027215	7.12194e-05	-1.23719	down	-1.23719
HCCS	0.0027272	7.15452e-05	-1.42045	down	-1.42045
ISCU	0.00272858	7.19349e-05	1.21455	up	1.21455
SART3	0.00272858	7.19349e-05	1.21455	up	1.21455
PSMC6	0.00272937	7.21325e-05	-0.7428	down	-0.7428
STYX	0.00272937	7.21325e-05	-0.7428	down	-0.7428
DAP-DT	0.00274813	7.29845e-05	-0.889642	down	-0.889642
DAP	0.00274813	7.29845e-05	-0.889642	down	-0.889642
MIR1909	0.00278211	7.40672e-05	1.58995	up	1.58995
ATP8B3	0.00278211	7.40672e-05	1.58995	up	1.58995
REXO1	0.00278211	7.40672e-05	1.58995	up	1.58995
CEBPZ	0.00280299	7.49861e-05	-0.941042	down	-0.941042
NDUFAF7	0.00280299	7.49861e-05	-0.941042	down	-0.941042
UBE2R2-AS1	0.00286112	7.69117e-05	1.55107	up	1.55107
UBE2R2	0.00286112	7.69117e-05	1.55107	up	1.55107
SAP130	0.00288186	7.7656e-05	-1.04043	down	-1.04043
HIF1A-AS3	0.00291405	7.8901e-05	-1.16478	down	-1.16478
LOC124903189	0.00291405	7.88501e-05	-1.23719	down	-1.23719
MIR17	0.00291405	7.88501e-05	-1.23719	down	-1.23719
MIR18A	0.00291405	7.88501e-05	-1.23719	down	-1.23719
MIR19A	0.00291405	7.88501e-05	-1.23719	down	-1.23719
MIR19B1	0.00291405	7.88501e-05	-1.23719	down	-1.23719
MIR20A	0.00291405	7.88501e-05	-1.23719	down	-1.23719
MIR92A1	0.00291405	7.88501e-05	-1.23719	down	-1.23719
MIR17HG	0.00291405	7.88501e-05	-1.23719	down	-1.23719
LOC107984950	0.00294902	8.023e-05	-0.741998	down	-0.741998
ARMH1	0.00294902	8.023e-05	-0.741998	down	-0.741998
TMEM53	0.00294902	8.023e-05	-0.741998	down	-0.741998
ABCA7	0.00296643	8.08956e-05	0.945767	up	0.945767
CNN2	0.00296643	8.08956e-05	0.945767	up	0.945767
ARHGAP45	0.00296643	8.08956e-05	0.945767	up	0.945767
C12orf76	0.00300555	8.21571e-05	-1.23961	down	-1.23961
EPHA10	0.00303823	8.32472e-05	1.23876	up	1.23876
ABRAXAS2	0.00311057	8.54309e-05	0.820729	up	0.820729
MISP	0.00313376	8.62707e-05	1.62042	up	1.62042
PALM	0.00313376	8.62707e-05	1.62042	up	1.62042
TFDP2	0.00317159	8.75177e-05	-1.29465	down	-1.29465
SLU7	0.00317528	8.80308e-05	-0.809332	down	-0.809332
FAM200C	0.00317528	8.80308e-05	-0.809332	down	-0.809332
SLC4A7	0.00317528	8.79595e-05	-1.26947	down	-1.26947
STEAP2-AS1	0.00318623	8.93665e-05	-0.840317	down	-0.840317
TNK2	0.00318623	8.89663e-05	-0.955614	down	-0.955614
LINC01983	0.00318623	8.89663e-05	-0.955614	down	-0.955614
MIR6829	0.00318623	8.89663e-05	-0.955614	down	-0.955614
MIR6810	0.00318623	8.92916e-05	-1.0719	down	-1.0719
LOC105373880	0.00318623	8.92916e-05	-1.0719	down	-1.0719
HEXIM1	0.00318623	8.87558e-05	1.19066	up	1.19066
PNKD	0.00318623	8.92916e-05	-1.0719	down	-1.0719
ACLY	0.0031928	8.97575e-05	1.35881	up	1.35881
KLHL11	0.0031928	8.97575e-05	1.35881	up	1.35881
LOC107984950	0.00322698	9.09273e-05	-0.741998	down	-0.741998
TMEM53	0.00322698	9.09273e-05	-0.741998	down	-0.741998
LNCSRLR	0.00330203	9.38813e-05	-0.800395	down	-0.800395
LOC124903189	0.00330203	9.41114e-05	-1.23719	down	-1.23719
GPC5	0.00330203	9.41114e-05	-1.23719	down	-1.23719
BICRAL	0.00330203	9.39856e-05	1.03787	up	1.03787
MIR17	0.00330203	9.41114e-05	-1.23719	down	-1.23719
MIR18A	0.00330203	9.41114e-05	-1.23719	down	-1.23719
MIR19A	0.00330203	9.41114e-05	-1.23719	down	-1.23719
MIR19B1	0.00330203	9.41114e-05	-1.23719	down	-1.23719
MIR20A	0.00330203	9.41114e-05	-1.23719	down	-1.23719
MIR92A1	0.00330203	9.41114e-05	-1.23719	down	-1.23719
MIR17HG	0.00330203	9.41114e-05	-1.23719	down	-1.23719
PLOD2	0.00330203	9.38813e-05	-0.800395	down	-0.800395
WNK1	0.00330203	9.3267e-05	1.05745	up	1.05745
KCNMB2-AS1	0.00330838	9.45069e-05	1.47089	up	1.47089
LOC124906307	0.00330838	9.45069e-05	1.47089	up	1.47089
LOC124909461	0.00330838	9.45069e-05	1.47089	up	1.47089
TDRKH-AS1	0.00333136	9.55949e-05	1.69713	up	1.69713
TDRKH	0.00333136	9.55949e-05	1.69713	up	1.69713
MIR4762	0.00335462	9.64796e-05	0.857492	up	0.857492
ATXN10	0.00335462	9.64796e-05	0.857492	up	0.857492
PRORP-PSMA6	0.00338188	9.79209e-05	-0.859254	down	-0.859254
PSMA6	0.00338188	9.79209e-05	-0.859254	down	-0.859254
CXCL16	0.00338188	9.79082e-05	1.52468	up	1.52468
ZMYND15	0.00338188	9.79082e-05	1.52468	up	1.52468
PRORP	0.00338188	9.79209e-05	-0.859254	down	-0.859254
GLCCI1-DT	0.00339281	9.93891e-05	-1.1314	down	-1.1314
BIVM-ERCC5	0.00339281	9.94013e-05	-0.743594	down	-0.743594
GLCCI1	0.00339281	9.93891e-05	-1.1314	down	-1.1314
IRGQ	0.00339281	9.95557e-05	-0.816618	mixed	-0.816618
BIVM	0.00339281	9.94013e-05	-0.743594	down	-0.743594
UMAD1	0.00339281	9.93891e-05	-1.1314	down	-1.1314
XRCC1	0.00339281	9.95557e-05	-0.816618	mixed	-0.816618
POGLUT2	0.00339281	9.94013e-05	-0.743594	down	-0.743594
H2AC13	0.00339281	9.86792e-05	-1.26729	down	-1.26729
H3C10	0.00339281	9.86792e-05	-1.26729	down	-1.26729
PARVA	0.00344906	0.00010143	-1.38598	down	-1.38598
MTMR12	0.0034595	0.000102009	-1.24132	down	-1.24132
UBXN6	0.0034595	0.000102185	-1.12612	down	-1.12612
ATXN7L3	0.00354424	0.000104918	1.54288	up	1.54288
LOC105374589	0.00355296	0.000105406	-0.856631	down	-0.856631
MSH6	0.00355296	0.000105406	-0.856631	down	-0.856631
MSH2	0.00355296	0.000105406	-0.856631	down	-0.856631
MSH2-OT1	0.00355296	0.000105406	-0.856631	down	-0.856631
TRIM59-IFT80	0.00362626	0.000107815	-0.918278	down	-0.918278
IL12A-AS1	0.00362626	0.000107815	-0.918278	down	-0.918278
TRIM59	0.00362626	0.000107815	-0.918278	down	-0.918278
IFT80	0.00362626	0.000107815	-0.918278	down	-0.918278
HDGF	0.00367864	0.000109849	-1.19304	down	-1.19304
SLC52A1	0.00367864	0.00010962	1.279	up	1.279
MRPL24	0.00367864	0.000109849	-1.19304	down	-1.19304
CASC11	0.00373351	0.000111972	-1.61492	down	-1.61492
ZNF672	0.00373351	0.000111975	-0.972296	down	-0.972296
LRBA	0.00373351	0.000112213	-1.10655	down	-1.10655
TTC7A	0.00376186	0.000113309	-1.5854	down	-1.5854
NKIRAS2	0.00377495	0.000114192	1.61379	up	1.61379
DNAJC7	0.00377495	0.000114192	1.61379	up	1.61379
LOC107983998	0.00377551	0.000114454	1.23401	up	1.23401
CCDC106	0.00377551	0.000114454	1.23401	up	1.23401
ZNF580	0.00377551	0.000114454	1.23401	up	1.23401
ZNF581	0.00377551	0.000114454	1.23401	up	1.23401
LINC00963	0.00378462	0.000114975	1.10756	up	1.10756
LOC124900275	0.00378462	0.000114975	1.10756	up	1.10756
SENP3-EIF4A1	0.00379217	0.000118053	1.55182	up	1.55182
PYGO2-AS1	0.00379217	0.00011851	0.984175	up	0.984175
LOC107983998	0.00379217	0.000118269	1.23401	up	1.23401
SMPDL3A	0.00379217	0.000118408	-1.25186	down	-1.25186
CKAP4	0.00379217	0.000119069	1.39706	up	1.39706
LOC112268030	0.00379217	0.000118595	-0.841292	down	-0.841292
U2AF2	0.00379217	0.000118269	1.23401	up	1.23401
CYB5D1	0.00379217	0.000117968	1.84657	up	1.84657
ZNF786	0.00379217	0.000116114	0.928266	up	0.928266
DNAH2	0.00379217	0.000117968	1.84657	up	1.84657
EIF4A1	0.00379217	0.000118053	1.55182	up	1.55182
KDM6B	0.00379217	0.000117968	1.84657	up	1.84657
SENP3	0.00379217	0.000118053	1.55182	up	1.55182
SNORA67	0.00379217	0.000118053	1.55182	up	1.55182
CCDC106	0.00379217	0.000118269	1.23401	up	1.23401
TNFSF12-TNFSF13	0.00379217	0.000118053	1.55182	up	1.55182
ZNF580	0.00379217	0.000118269	1.23401	up	1.23401
ZNF581	0.00379217	0.000118269	1.23401	up	1.23401
GLT8D1	0.00379217	0.000119135	-0.783884	down	-0.783884
RNF20	0.00379217	0.000117847	-1.13163	down	-1.13163
PBXIP1	0.00379217	0.00011851	0.984175	up	0.984175
SHC1	0.00379217	0.00011851	0.984175	up	0.984175
SNORA48	0.00379217	0.000118053	1.55182	up	1.55182
SNORD10	0.00379217	0.000118053	1.55182	up	1.55182
NEK4	0.00379217	0.000119135	-0.783884	down	-0.783884
SDHAP3	0.00379217	0.000117361	-0.680424	down	-0.680424
ZNF140	0.00379217	0.000117914	1.27561	up	1.27561
THAP9	0.00379217	0.000119055	-1.0991	down	-1.0991
UTP23	0.00379217	0.000118595	-0.841292	down	-0.841292
TNFSF13	0.00379217	0.000118053	1.55182	up	1.55182
LDB1	0.00379217	0.000117852	1.18054	up	1.18054
PYGO2	0.00379217	0.00011851	0.984175	up	0.984175
TMEM88	0.00379217	0.000117968	1.84657	up	1.84657
CD68	0.00379217	0.000118053	1.55182	up	1.55182
MZT1	0.00379553	0.000119732	-0.864055	down	-0.864055
BORA	0.00379553	0.000119732	-0.864055	down	-0.864055
LOC107987126	0.0039075	0.000123574	1.43579	up	1.43579
DZIP1	0.0039075	0.00012377	-1.17907	down	-1.17907
PFKFB2	0.00396413	0.000125821	-1.5609	down	-1.5609
CD46	0.00397346	0.000126374	-0.901429	down	-0.901429
ZNF687-AS1	0.00401621	0.000128775	1.43752	up	1.43752
MIR6868	0.00401621	0.000128139	1.07488	up	1.07488
EXOC7	0.00401621	0.000128139	1.07488	up	1.07488
ZNF687	0.00401621	0.000128775	1.43752	up	1.43752
H4C5	0.00401621	0.00012875	-1.52127	down	-1.52127
LOC100131635	0.00406128	0.000130483	-1.51074	down	-1.51074
NDUFV1-DT	0.00407458	0.000133795	1.59888	up	1.59888
BCL2L2-PABPN1	0.00407458	0.000133786	-0.954067	down	-0.954067
LINC01843	0.00407458	0.000131906	-1.47697	down	-1.47697
MIR200CHG	0.00407458	0.000133452	1.46082	up	1.46082
LOC105371082	0.00407458	0.000133173	-0.893142	down	-0.893142
HNRNPUL1	0.00407458	0.000132706	1.93303	up	1.93303
RMI2	0.00407458	0.000133173	-0.893142	down	-0.893142
NRBF2	0.00407458	0.000131767	1.28355	up	1.28355
MIR141	0.00407458	0.000133452	1.46082	up	1.46082
MIR200C	0.00407458	0.000133452	1.46082	up	1.46082
NDUFV1	0.00407458	0.000133795	1.59888	up	1.59888
AXL	0.00407458	0.000132706	1.93303	up	1.93303
PTPN6	0.00407458	0.000133452	1.46082	up	1.46082
CCDC14	0.00407458	0.000133814	-0.672598	down	-0.672598
PABPN1	0.00407458	0.000133786	-0.954067	down	-0.954067
CCDC97	0.00407458	0.000132706	1.93303	up	1.93303
ANO8	0.00408148	0.000134304	1.47615	up	1.47615
CAGE1	0.00412944	0.00013615	-0.979535	down	-0.979535
SSR1	0.00412944	0.00013615	-0.979535	down	-0.979535
FSCN2	0.00415995	0.000137695	1.34128	up	1.34128
PLA2G4D	0.00415995	0.000137498	1.47361	up	1.47361
RPS6	0.00419913	0.000139264	-1.54617	down	-1.54617
ZFYVE1	0.004209	0.000139864	-0.850732	down	-0.850732
BIVM-ERCC5	0.00421522	0.000140617	-0.743594	down	-0.743594
LINC01778	0.00421522	0.000140371	-1.44216	down	-1.44216
ERCC5	0.00421522	0.000140617	-0.743594	down	-0.743594
BIVM	0.00421522	0.000140617	-0.743594	down	-0.743594
MTRES1	0.00422771	0.000141307	-1.26756	down	-1.26756
LOC105371723	0.00424308	0.000142172	0.896715	up	0.896715
OXR1-AS1	0.00424308	0.00014237	-0.985124	down	-0.985124
SMURF2P1-LRRC37BP1	0.00424308	0.000142172	0.896715	up	0.896715
SH3GL1P2	0.00424308	0.000142172	0.896715	up	0.896715
ELOB	0.00426734	0.000143461	0.692237	up	0.692237
LOC100128966	0.00427396	0.00014538	-0.800957	down	-0.800957
HOTTIP	0.00427396	0.000145898	-1.09962	down	-1.09962
DM1-AS	0.00427396	0.000144719	1.78554	up	1.78554
SIX5	0.00427396	0.000144719	1.78554	up	1.78554
DMPK	0.00427396	0.000144719	1.78554	up	1.78554
NKPD1	0.00427396	0.000145084	1.66226	up	1.66226
HOXA13	0.00427396	0.000145898	-1.09962	down	-1.09962
P2RY1	0.00427396	0.000145079	-0.745444	down	-0.745444
FAM53C	0.00427396	0.00014538	-0.800957	down	-0.800957
TRAPPC6A	0.00427396	0.000145084	1.66226	up	1.66226
CDC6	0.00427396	0.000144444	-1.22506	down	-1.22506
MIR1276	0.00431558	0.000147599	-1.07267	down	-1.07267
KLHL25	0.00431558	0.000147599	-1.07267	down	-1.07267
SH3D21	0.00431967	0.000148018	-1.23467	down	-1.23467
THRAP3	0.00431967	0.000148018	-1.23467	down	-1.23467
HIVEP2-DT	0.00435655	0.000149693	1.90046	up	1.90046
INHBA-AS1	0.00435655	0.000150129	1.44449	up	1.44449
INHBA	0.00435655	0.000150129	1.44449	up	1.44449
EPHB1	0.00436649	0.000150754	-1.14569	down	-1.14569
CEP63	0.00436649	0.000150754	-1.14569	down	-1.14569
XPOT	0.00436991	0.000151721	1.38515	up	1.38515
TMEM14B-DT	0.00436991	0.000151551	-1.05143	down	-1.05143
TBK1	0.00436991	0.000151721	1.38515	up	1.38515
PLCD1	0.00436991	0.000151489	-0.795772	down	-0.795772
LOC124904077	0.00439526	0.000152886	1.17355	up	1.17355
CHMP6	0.00439526	0.000152886	1.17355	up	1.17355
BRINP3-DT	0.00441068	0.000153994	-1.11475	down	-1.11475
IGF2R	0.00441068	0.000153867	-1.34238	down	-1.34238
CHP1P2	0.00441068	0.000153867	-1.34238	down	-1.34238
TPTEP2-CSNK1E	0.00441403	0.000154397	1.04668	up	1.04668
TPTEP2	0.00441403	0.000154397	1.04668	up	1.04668
MIR6798	0.00444995	0.00015623	1.64384	up	1.64384
RUVBL2	0.00444995	0.00015623	1.64384	up	1.64384
GYS1	0.00444995	0.00015623	1.64384	up	1.64384
CNKSR1	0.00445383	0.000156984	-0.856299	down	-0.856299
LOC124901139	0.00445383	0.000157231	-1.22913	down	-1.22913
CATSPER4	0.00445383	0.000156984	-0.856299	down	-0.856299
NSG2	0.00445383	0.000157231	-1.22913	down	-1.22913
ANKRD10	0.00447342	0.000158502	-0.832191	down	-0.832191
GOLGA5	0.00447342	0.000158313	1.03325	up	1.03325
SELENOT	0.00451955	0.00016043	-0.739689	down	-0.739689
DLG3-AS1	0.0045305	0.000161711	1.66771	up	1.66771
DLG3	0.0045305	0.000161711	1.66771	up	1.66771
CCDC162P	0.0045305	0.000161992	-1.00529	down	-1.00529
SIN3A	0.0045305	0.000161957	-1.46784	down	-1.46784
CEP57L1	0.0045305	0.000161992	-1.00529	down	-1.00529
MAN2C1	0.0045305	0.000161957	-1.46784	down	-1.46784
DDX41	0.00454506	0.000162807	-1.12986	down	-1.12986
FAM193B	0.00454506	0.000162807	-1.12986	down	-1.12986
DOK3	0.00454506	0.000162807	-1.12986	down	-1.12986
MIR548BB	0.00456974	0.000163987	-1.1691	down	-1.1691
LOC124906379	0.00456974	0.000163987	-1.1691	down	-1.1691
FHIT	0.00456974	0.000163987	-1.1691	down	-1.1691
AHCTF1	0.00458126	0.000164697	-1.24388	down	-1.24388
PYGB	0.00458583	0.000165456	1.51118	up	1.51118
H2BC12	0.00458583	0.000165219	-1.1056	down	-1.1056
LOC128092248	0.00460599	0.000166481	1.0273	up	1.0273
ABL1	0.00460599	0.000166481	1.0273	up	1.0273
107984755	0.00462186	0.000167654	-1.15138	down	-1.15138
DUT	0.00462186	0.000167654	-1.15138	down	-1.15138
ADCY5	0.00465057	0.000168997	0.955699	up	0.955699
MIR378I	0.00472814	0.000172428	1.13751	up	1.13751
MIR6756	0.00472814	0.000172126	1.10502	up	1.10502
TNFRSF13C	0.00472814	0.000172428	1.13751	up	1.13751
MCAM	0.00472814	0.000172126	1.10502	up	1.10502
CERS4	0.00475075	0.00017356	1.11232	up	1.11232
PPP6R3	0.00477366	0.000174706	0.661289	up	0.661289
MAGOHB	0.00478624	0.000175477	-1.5539	down	-1.5539
XPO6	0.00480545	0.000176493	1.39791	up	1.39791
LNC-LBCS	0.0048548	0.000179248	-1.36608	down	-1.36608
LOC105374961	0.0048548	0.000179248	-1.36608	down	-1.36608
LOC107986575	0.0048548	0.000179248	-1.36608	down	-1.36608
TMEM50A	0.0048548	0.00017924	1.55203	up	1.55203
PLP2	0.00490445	0.000181399	-1.3789	down	-1.3789
LOC101929626	0.0050173	0.000186873	-1.57417	down	-1.57417
P3R3URF	0.0050173	0.000186873	-1.57417	down	-1.57417
P3R3URF-PIK3R3	0.0050173	0.000186873	-1.57417	down	-1.57417
FLYWCH2	0.0050173	0.000185904	1.09185	up	1.09185
PIK3R3	0.0050173	0.000186873	-1.57417	down	-1.57417
EIF3H	0.00513466	0.000191577	-0.841292	down	-0.841292
C1orf216	0.00514465	0.000192616	-1.40086	down	-1.40086
HIVEP2	0.00514465	0.000192462	1.90046	up	1.90046
CLSPN	0.00514465	0.000192616	-1.40086	down	-1.40086
LOC100289230	0.00517443	0.000194402	-1.47243	down	-1.47243
CHD1	0.00517443	0.000194402	-1.47243	down	-1.47243
TMEM265	0.0052266	0.000198054	-0.731695	down	-0.731695
SRCAP	0.0052266	0.000198054	-0.731695	down	-0.731695
TOPBP1	0.0052266	0.000197814	-0.721724	down	-0.721724
LOC124909437	0.0052266	0.000197814	-0.721724	down	-0.721724
PNLDC1	0.0052266	0.000197871	-1.2219	down	-1.2219
MRPL18	0.0052266	0.000197871	-1.2219	down	-1.2219
PHKG2	0.0052266	0.000198054	-0.731695	down	-0.731695
SRPRB	0.0052266	0.000197814	-0.721724	down	-0.721724
SNORA20	0.0052266	0.000197871	-1.2219	down	-1.2219
SNORA29	0.0052266	0.000197871	-1.2219	down	-1.2219
TCP1	0.0052266	0.000197871	-1.2219	down	-1.2219
TF	0.0052266	0.000197814	-0.721724	down	-0.721724
RNF40	0.0052266	0.000198054	-0.731695	down	-0.731695
HNRNPA0	0.00533542	0.000202523	-1.10824	down	-1.10824
FUOM	0.00536439	0.00020397	1.00317	up	1.00317
LOC100129203	0.00537721	0.000205781	-1.17807	down	-1.17807
MIR3143	0.00537721	0.000206523	-1.1056	down	-1.1056
OXCT1-AS1	0.00537721	0.000207244	-1.12937	down	-1.12937
LNCRNA-IUR	0.00537721	0.000205781	-1.17807	down	-1.17807
LOC102723752	0.00537721	0.000207244	-1.12937	down	-1.12937
TMEM150A	0.00537721	0.000205554	1.38517	up	1.38517
C2orf68	0.00537721	0.000205554	1.38517	up	1.38517
MNT	0.00537721	0.000205397	-0.925961	down	-0.925961
OXCT1	0.00537721	0.000207244	-1.12937	down	-1.12937
H2AC12	0.00537721	0.000206523	-1.1056	down	-1.1056
TOR1A	0.00538863	0.000208602	-1.30808	down	-1.30808
NR6A1	0.00538863	0.000208798	1.43579	up	1.43579
UBE2S	0.00538863	0.000208134	-0.981031	down	-0.981031
CHST10	0.00538863	0.000209081	-1.03135	down	-1.03135
CHAC2	0.00541381	0.000210409	-1.47775	down	-1.47775
KRT42P	0.00545294	0.000212282	-1.55779	down	-1.55779
KRT17	0.00545294	0.000212282	-1.55779	down	-1.55779
TENT5C-DT	0.00546446	0.000215181	1.01768	up	1.01768
MCAT	0.00546446	0.000215209	-1.16122	down	-1.16122
HIF1A	0.00546446	0.00021416	-1.16478	down	-1.16478
BRINP3	0.00546446	0.000213222	-1.11475	down	-1.11475
TENT5C	0.00546446	0.000215181	1.01768	up	1.01768
SNAPC1	0.00546446	0.00021416	-1.16478	down	-1.16478
ZNF75A	0.00546446	0.00021517	0.818911	up	0.818911
TIGD7	0.00546446	0.00021517	0.818911	up	0.818911
PLCXD2	0.00553608	0.000218388	-0.917197	down	-0.917197
PHLDB2	0.00553608	0.000218388	-0.917197	down	-0.917197
TERF1	0.00555366	0.000219441	-0.862453	down	-0.862453
GCA	0.00557509	0.000220649	-1.09144	down	-1.09144
SCAF1	0.00558389	0.000221359	0.882034	up	0.882034
RBM45	0.00559434	0.000222136	-0.94771	down	-0.94771
SGO1-AS1	0.00564595	0.000224551	-1.03936	down	-1.03936
LOC101927829	0.00564595	0.000224551	-1.03936	down	-1.03936
SNRPD1	0.00565499	0.000225276	-0.787941	down	-0.787941
SH2D3C	0.00565589	0.000226773	-0.683995	down	-0.683995
LOC101929767	0.00565589	0.00022716	1.28081	up	1.28081
TMEM106A	0.00565589	0.00022716	1.28081	up	1.28081
EXOSC8	0.00565589	0.00022751	-0.850574	down	-0.850574
LOC124900391	0.00565589	0.00022716	1.28081	up	1.28081
ALG5	0.00565589	0.00022751	-0.850574	down	-0.850574
NBR1	0.00565589	0.00022716	1.28081	up	1.28081
BRCA1	0.00565589	0.00022716	1.28081	up	1.28081
OVOL1	0.00566045	0.000228061	1.49407	up	1.49407
LINC02928	0.00569928	0.000230363	-1.03873	down	-1.03873
SRD5A3	0.00569928	0.000230363	-1.03873	down	-1.03873
TLX1NB	0.00573251	0.000232078	-1.29414	down	-1.29414
SPIN4-AS1	0.00573423	0.000235045	-1.55662	down	-1.55662
LOC105377212	0.00573423	0.000235045	-1.55662	down	-1.55662
KPNB1-DT	0.00573423	0.00023477	1.27233	up	1.27233
SPIN4	0.00573423	0.000235045	-1.55662	down	-1.55662
OR1F2P	0.00573423	0.000235119	1.03429	up	1.03429
KPNB1	0.00573423	0.00023477	1.27233	up	1.27233
OR1F1	0.00573423	0.000235119	1.03429	up	1.03429
PRPS1	0.00573423	0.000233554	-1.25691	down	-1.25691
H2AC13	0.00573423	0.000234363	-1.26729	down	-1.26729
H2BC13	0.00573423	0.000234363	-1.26729	down	-1.26729
H3C10	0.00573423	0.000234363	-1.26729	down	-1.26729
LINC01278	0.00573423	0.000235045	-1.55662	down	-1.55662
FH	0.00579571	0.000238015	-0.896122	down	-0.896122
RRAS	0.00581799	0.000239307	0.882034	up	0.882034
LOC124900547	0.00584131	0.000240645	-0.739689	down	-0.739689
SERP1	0.00584131	0.000240645	-0.739689	down	-0.739689
PDS5A	0.0059041	0.000243614	0.97325	up	0.97325
LOC105372165	0.00590829	0.00024417	-1.00627	down	-1.00627
CDCA7L	0.00592162	0.000245104	-0.664789	down	-0.664789
ANTKMT	0.00595369	0.000246835	1.41711	up	1.41711
ZBTB14	0.00595369	0.000247203	-1.35685	down	-1.35685
METRN	0.00595369	0.000246835	1.41711	up	1.41711
SGO1	0.00598642	0.000249501	-1.03936	down	-1.03936
REV1	0.00598642	0.000249014	1.20563	up	1.20563
SLC30A3	0.00598642	0.000249725	1.3619	up	1.3619
PMS2P9	0.0060053	0.000251291	-1.07192	down	-1.07192
DTX2P1-UPK3BP1-PMS2P11	0.0060053	0.000251291	-1.07192	down	-1.07192
CCDC146	0.0060053	0.000251291	-1.07192	down	-1.07192
FAM185BP	0.0060053	0.000251291	-1.07192	down	-1.07192
USP21	0.0060175	0.000252191	1.04047	up	1.04047
UFC1	0.0060175	0.000252191	1.04047	up	1.04047
PPOX	0.0060175	0.000252191	1.04047	up	1.04047
FAM83F	0.00603299	0.000254012	1.51387	up	1.51387
TNRC6B-DT	0.00603299	0.000254012	1.51387	up	1.51387
TNRC6B	0.00603299	0.000254012	1.51387	up	1.51387
RPS6KA5	0.00603299	0.000253858	-0.684071	down	-0.684071
LOC107984433	0.00604399	0.000255988	-1.51397	down	-1.51397
ADAMTS19	0.00604399	0.000256042	-0.836863	down	-0.836863
TTC41P	0.00604399	0.000255988	-1.51397	down	-1.51397
GPR160	0.00604399	0.000255052	-1.14649	down	-1.14649
NT5DC3	0.00604399	0.000255988	-1.51397	down	-1.51397
YTHDF3-DT	0.00615737	0.000262041	-0.97563	down	-0.97563
YTHDF3	0.00615737	0.000262041	-0.97563	down	-0.97563
QSOX1	0.00615737	0.000261526	-1.24263	down	-1.24263
PIBF1	0.00623512	0.000266158	-0.715187	down	-0.715187
DIS3	0.00623512	0.000266158	-0.715187	down	-0.715187
LOC124902968	0.00627279	0.000269366	-1.53508	down	-1.53508
KLHL24	0.00627279	0.000269391	0.813148	up	0.813148
OXR1	0.00627279	0.000268922	-0.985124	down	-0.985124
PGAP4	0.00627279	0.000269365	-1.13163	down	-1.13163
CAPS2	0.00627279	0.000269366	-1.53508	down	-1.53508
LOC101927690	0.00632926	0.00027249	-0.817821	down	-0.817821
GRIFIN	0.00632926	0.000272636	1.53557	up	1.53557
TMEM260	0.00632926	0.00027249	-0.817821	down	-0.817821
MELTF-AS1	0.00637453	0.00027509	1.01572	up	1.01572
CDC42BPG	0.00637453	0.000275412	1.76326	up	1.76326
PLCB3	0.00653834	0.000282913	1.15068	up	1.15068
GPR137	0.00653834	0.000282913	1.15068	up	1.15068
SCNN1A	0.00657514	0.000284931	-1.28341	down	-1.28341
AHI1-DT	0.00665741	0.00028979	-0.847192	down	-0.847192
MIR670	0.00665741	0.000289747	-1.01064	down	-1.01064
MIR670HG	0.00665741	0.000289747	-1.01064	down	-1.01064
MIR129-2	0.00665741	0.000289747	-1.01064	down	-1.01064
HSD17B12	0.00665741	0.000289747	-1.01064	down	-1.01064
AHI1	0.00665741	0.00028979	-0.847192	down	-0.847192
MIR1538	0.00667489	0.000290983	1.59683	up	1.59683
E2F3-IT1	0.00669311	0.000292645	-0.812794	down	-0.812794
E2F3	0.00669311	0.000292645	-0.812794	down	-0.812794
C4orf3	0.00669311	0.000292253	-1.38254	down	-1.38254
LOC100129203	0.0067283	0.000295811	-1.17807	down	-1.17807
LNCRNA-IUR	0.0067283	0.000295811	-1.17807	down	-1.17807
TPTEP2-CSNK1E	0.0067283	0.000295927	1.04668	up	1.04668
USP7-AS1	0.0067283	0.000295475	1.50953	up	1.50953
CSNK1E	0.0067283	0.000295927	1.04668	up	1.04668
TPTEP2	0.0067283	0.000295927	1.04668	up	1.04668
USP7	0.0067283	0.000295475	1.50953	up	1.50953
NIPAL3	0.00673875	0.000297259	-1.38441	down	-1.38441
STPG1	0.00673875	0.000297259	-1.38441	down	-1.38441
HMSD	0.0068026	0.000300516	-1.00627	down	-1.00627
SERPINB8	0.0068026	0.000300516	-1.00627	down	-1.00627
SYCP2L	0.00685109	0.000303102	-1.05143	down	-1.05143
TMEM14B	0.00685109	0.000303102	-1.05143	down	-1.05143
ATXN7L3-AS1	0.00688875	0.000305215	1.54288	up	1.54288
NFIX	0.00691277	0.000306727	-1.27135	down	-1.27135
EEIG2	0.00692929	0.000307909	-1.1972	down	-1.1972
AEBP2	0.00699467	0.000311267	0.944285	up	0.944285
TRIM8	0.00702017	0.000312856	1.37018	up	1.37018
FGD5-AS1	0.00702243	0.000316141	1.68949	up	1.68949
LOC105376963	0.00702243	0.000316141	1.68949	up	1.68949
SESN1	0.00702243	0.000315885	-1.00529	down	-1.00529
PRMT1	0.00702243	0.000315841	1.68724	up	1.68724
IRF3	0.00702243	0.000315841	1.68724	up	1.68724
NR2C2	0.00702243	0.000316141	1.68949	up	1.68949
BCL2L12	0.00702243	0.000315841	1.68724	up	1.68724
LYRM7	0.00702243	0.000313535	-0.931785	down	-0.931785
LOC101929767	0.00702357	0.000316648	1.28081	up	1.28081
LOC124900391	0.00702357	0.000316648	1.28081	up	1.28081
BRCA1	0.00702357	0.000316648	1.28081	up	1.28081
MIR3193	0.00703542	0.000318093	-1.40091	down	-1.40091
ID1	0.00703542	0.000318093	-1.40091	down	-1.40091
LINC01311	0.00706579	0.000319924	1.10218	up	1.10218
LOC128092248	0.00714034	0.000325395	1.0273	up	1.0273
NUDT16	0.00714034	0.000325328	-0.601744	down	-0.601744
ABL1	0.00714034	0.000325395	1.0273	up	1.0273
GOLGB1	0.00714034	0.000325612	1.32381	up	1.32381
HCLS1	0.00714034	0.000325612	1.32381	up	1.32381
NUDT16-DT	0.00714034	0.000325328	-0.601744	down	-0.601744
SUSD1	0.00714034	0.000325572	1.09363	up	1.09363
NFAT5	0.00724082	0.000330663	1.59683	up	1.59683
NTAQ1	0.00732324	0.000335376	-0.904642	down	-0.904642
TTC31	0.00732324	0.000334967	0.915829	up	0.915829
TMEM9	0.00735069	0.000337109	1.15654	up	1.15654
RANGRF	0.0074397	0.000341673	1.07734	up	1.07734
MRPS9-AS2	0.00747833	0.000345385	-0.800459	down	-0.800459
LOC124904603	0.00747833	0.000345142	-1.19264	down	-1.19264
MRPS9	0.00747833	0.000345385	-0.800459	down	-0.800459
EXO1	0.00747833	0.000345142	-1.19264	down	-1.19264
LOC105377212	0.00761249	0.000352567	-1.55662	down	-1.55662
SPIN4	0.00761249	0.000352567	-1.55662	down	-1.55662
LINC01278	0.00761249	0.000352567	-1.55662	down	-1.55662
LOC107985656	0.0076693	0.000355695	-1.38259	down	-1.38259
TCEANC	0.0076693	0.000355695	-1.38259	down	-1.38259
THAP9-AS1	0.00767953	0.000357165	-1.0991	down	-1.0991
SEC31A	0.00767953	0.000357165	-1.0991	down	-1.0991
LOC100131943	0.00772747	0.000359895	-0.97496	down	-0.97496
CCDC144CP	0.00772747	0.000359895	-0.97496	down	-0.97496
SPECC1	0.00772747	0.000359895	-0.97496	down	-0.97496
FAM131A	0.00773792	0.000361776	-0.748047	down	-0.748047
EIF4G1	0.00773792	0.000361776	-0.748047	down	-0.748047
SF3B6	0.00773792	0.000361741	-0.853406	down	-0.853406
PAPOLG	0.00773792	0.000361885	1.23143	up	1.23143
SNORD66	0.00773792	0.000361776	-0.748047	down	-0.748047
TP53I3	0.00773792	0.000361741	-0.853406	down	-0.853406
TP73	0.00781943	0.000366203	-1.60562	down	-1.60562
ALG6	0.00783638	0.000367922	-0.818012	down	-0.818012
H2AC7	0.00783638	0.00036852	-1.46739	down	-1.46739
H2BC7	0.00783638	0.00036852	-1.46739	down	-1.46739
H3C4	0.00783638	0.00036852	-1.46739	down	-1.46739
LOC124901581	0.00785525	0.000369916	-1.19101	down	-1.19101
FOXK1	0.00785525	0.000369916	-1.19101	down	-1.19101
HEATR5B	0.00787308	0.000371266	-0.839437	down	-0.839437
STRN	0.00787308	0.000371266	-0.839437	down	-0.839437
LOC100134368	0.00789406	0.000373278	1.34273	up	1.34273
MRPL28	0.00789406	0.000373278	1.34273	up	1.34273
PGAP6	0.00789406	0.000373278	1.34273	up	1.34273
LINC00324	0.00790277	0.000374202	1.39613	up	1.39613
CTC1	0.00790277	0.000374202	1.39613	up	1.39613
RSRP1	0.00790406	0.000374775	1.55203	up	1.55203
ETFRF1	0.00792991	0.000377028	-0.777463	down	-0.777463
DNAI7	0.00792991	0.000377028	-0.777463	down	-0.777463
ZNF510	0.00801614	0.000381647	-0.80599	down	-0.80599
MELTF	0.0080542	0.00038398	1.01572	up	1.01572
POGLUT1	0.00811469	0.00038739	1.0461	up	1.0461
RAD51AP1	0.00812554	0.000391066	-0.724967	down	-0.724967
USP39	0.00812554	0.000390553	1.38517	up	1.38517
PATL2	0.00812554	0.000390752	-1.00097	down	-1.00097
ERF	0.00812554	0.000389712	1.462	up	1.462
GSK3A	0.00812554	0.000389712	1.462	up	1.462
FERRY3	0.00812554	0.000391066	-0.724967	down	-0.724967
SPG11	0.00812554	0.000390752	-1.00097	down	-1.00097
DYRK4	0.00812554	0.000391066	-0.724967	down	-0.724967
SRSF11	0.00812554	0.000390013	-0.914732	down	-0.914732
NAPA-AS1	0.00813963	0.000392798	1.58381	up	1.58381
KPTN	0.00813963	0.000392798	1.58381	up	1.58381
LOC124909470	0.00815258	0.000393951	-1.07499	down	-1.07499
DGKG	0.00815258	0.000393951	-1.07499	down	-1.07499
ETV5	0.00815258	0.000393951	-1.07499	down	-1.07499
LOC124900547	0.00816135	0.000394904	-0.739689	down	-0.739689
SERP1	0.00816135	0.000394904	-0.739689	down	-0.739689
MIR3158-1	0.00819471	0.000397049	1.6201	up	1.6201
DPCD	0.00819471	0.000397049	1.6201	up	1.6201
LOC100130872	0.00822904	0.000401911	1.17552	up	1.17552
MAEA	0.00822904	0.000401911	1.17552	up	1.17552
SPON2	0.00822904	0.000401911	1.17552	up	1.17552
LOC105374346	0.00822904	0.000401911	1.17552	up	1.17552
CTBP1	0.00822904	0.000401911	1.17552	up	1.17552
CCL28	0.00822904	0.000400671	-1.25184	down	-1.25184
SLC6A6	0.00822904	0.000399368	-1.44175	down	-1.44175
ZBTB10	0.00822904	0.000401724	1.64055	up	1.64055
CTBP1-DT	0.00822904	0.000401911	1.17552	up	1.17552
HEXIM2	0.00825002	0.000404538	0.988669	up	0.988669
FBXO25	0.00825002	0.000404063	-1.28146	down	-1.28146
ANGEL2	0.00825002	0.000403594	0.9008	up	0.9008
RSKR	0.00826757	0.000405935	0.985315	up	0.985315
UNC119	0.00826757	0.000405935	0.985315	up	0.985315
PIGS	0.00826757	0.000405935	0.985315	up	0.985315
LINC01132	0.00827744	0.000406955	-1.35839	down	-1.35839
RGS17	0.00834292	0.000410715	-1.25091	down	-1.25091
MTRF1L	0.00834292	0.000410715	-1.25091	down	-1.25091
LOC100128966	0.00839335	0.000415372	-0.800957	down	-0.800957
FAM53C	0.00839335	0.000415372	-0.800957	down	-0.800957
KDM3B	0.00839335	0.000415372	-0.800957	down	-0.800957
ZSCAN32	0.00839335	0.000414972	1.37897	up	1.37897
ZNF174	0.00839335	0.000414972	1.37897	up	1.37897
NAA60	0.00839335	0.000414972	1.37897	up	1.37897
CDC25C	0.00839335	0.000415372	-0.800957	down	-0.800957
RAB4A-AS1	0.00845042	0.000419292	-1.00075	down	-1.00075
RAB4A	0.00845042	0.000419292	-1.00075	down	-1.00075
BCL2L2-PABPN1	0.00847296	0.00042194	-0.954067	down	-0.954067
NDUFS4	0.00847296	0.000420995	1.29472	up	1.29472
BCL2L2	0.00847296	0.00042194	-0.954067	down	-0.954067
PABPN1	0.00847296	0.00042194	-0.954067	down	-0.954067
GADD45GIP1	0.00847296	0.000422056	0.899449	up	0.899449
CUL4B	0.00848812	0.000423361	-1.23616	down	-1.23616
RANBP3-DT	0.00849649	0.000424879	1.15588	up	1.15588
RANBP3	0.00849649	0.000424879	1.15588	up	1.15588
UVSSA	0.00849774	0.000425492	-1.19754	down	-1.19754
SYCP2L	0.0085646	0.000429395	-1.05143	down	-1.05143
TMEM14B	0.0085646	0.000429395	-1.05143	down	-1.05143
LOC105370460	0.00857118	0.00043139	-1.13339	down	-1.13339
LOC105370461	0.00857118	0.00043139	-1.13339	down	-1.13339
LOC105370462	0.00857118	0.00043139	-1.13339	down	-1.13339
LOC112267899	0.00857118	0.00043139	-1.13339	down	-1.13339
FBXO33	0.00857118	0.00043139	-1.13339	down	-1.13339
LOC101926887	0.00871136	0.00043901	-1.00833	down	-1.00833
LOC105378419	0.00871136	0.00043901	-1.00833	down	-1.00833
LIPA	0.00871136	0.00043901	-1.00833	down	-1.00833
MIR4722	0.00873263	0.000441892	0.890138	up	0.890138
LOC124903009	0.00873263	0.000442344	-0.856718	down	-0.856718
CRY1	0.00873263	0.000442344	-0.856718	down	-0.856718
H2AC7	0.00873263	0.000442224	-1.46739	down	-1.46739
H3C4	0.00873263	0.000442224	-1.46739	down	-1.46739
PIEZO1	0.00873263	0.000441892	0.890138	up	0.890138
DIS3L	0.00901891	0.00045743	0.965072	up	0.965072
ATG7	0.00904573	0.000459376	-0.859196	down	-0.859196
UBR2	0.00915937	0.000466334	1.00282	up	1.00282
APOF	0.00915937	0.000466228	-0.985282	down	-0.985282
STAT2	0.00915937	0.000466228	-0.985282	down	-0.985282
MIR6795	0.00917966	0.000469746	1.38048	up	1.38048
LOC107987097	0.00917966	0.000469562	0.930048	up	0.930048
FAM120AOS	0.00917966	0.000469562	0.930048	up	0.930048
FAM120A	0.00917966	0.000469562	0.930048	up	0.930048
NOTCH3	0.00917966	0.000469746	1.38048	up	1.38048
AKIRIN1	0.00920448	0.000471612	1.15862	up	1.15862
SUGP2	0.00920646	0.000475356	1.01759	up	1.01759
LOC101928059	0.00920646	0.000474644	-1.19093	down	-1.19093
LINC02284	0.00920646	0.000474651	-0.682201	down	-0.682201
124903321	0.00920646	0.000474651	-0.682201	down	-0.682201
SPTY2D1	0.00920646	0.000475888	-0.930077	down	-0.930077
LOC389199	0.00920646	0.000475785	1.49085	up	1.49085
ARMC6	0.00920646	0.000475356	1.01759	up	1.01759
SNX10	0.00926466	0.000479496	-1.28747	down	-1.28747
MIR4434	0.00936553	0.000487212	-0.876939	down	-0.876939
AFTPH-DT	0.00936553	0.000487212	-0.876939	down	-0.876939
LINC01852	0.00936553	0.00048775	-0.994343	down	-0.994343
PLAAT3	0.00936553	0.000487741	0.939136	up	0.939136
AFTPH	0.00936553	0.000487212	-0.876939	down	-0.876939
MAGEF1	0.0093675	0.00048846	-0.735279	down	-0.735279
MMADHC-DT	0.00937924	0.000490894	1.23971	up	1.23971
LOC105370460	0.00937924	0.000490893	-1.13339	down	-1.13339
LOC105370461	0.00937924	0.000490893	-1.13339	down	-1.13339
LOC105370462	0.00937924	0.000490893	-1.13339	down	-1.13339
LOC112267899	0.00937924	0.000490893	-1.13339	down	-1.13339
MMADHC	0.00937924	0.000490894	1.23971	up	1.23971
SNORD127	0.00940717	0.000494722	-0.916948	down	-0.916948
PRPF39-DT	0.00940717	0.000494722	-0.916948	down	-0.916948
LGR4-AS1	0.00940717	0.00049784	1.23042	up	1.23042
SCARNA18B	0.00940717	0.000496302	-0.754381	down	-0.754381
MRPL53	0.00940717	0.000497376	0.915829	up	0.915829
LOC124903416	0.00940717	0.000494722	-0.916948	down	-0.916948
ADIPOR1	0.00940717	0.000495518	-0.670733	down	-0.670733
UCHL5	0.00940717	0.000496302	-0.754381	down	-0.754381
PRPF39	0.00940717	0.000494722	-0.916948	down	-0.916948
LGR4	0.00940717	0.00049784	1.23042	up	1.23042
RO60	0.00940717	0.000496302	-0.754381	down	-0.754381
CCDC142	0.00940717	0.000497376	0.915829	up	0.915829
CCDC34	0.00940717	0.00049784	1.23042	up	1.23042
LOC105370027	0.00950834	0.000504426	-0.929367	down	-0.929367
PRKAB1	0.00950834	0.000504426	-0.929367	down	-0.929367
ERLIN1	0.00953024	0.000506205	-0.983663	down	-0.983663
CHUK	0.00953024	0.000506205	-0.983663	down	-0.983663
C2orf74-DT	0.00958647	0.000510434	-0.819094	down	-0.819094
C2orf74	0.00958647	0.000510434	-0.819094	down	-0.819094
SANBR	0.00958647	0.000510434	-0.819094	down	-0.819094
ATP2A2	0.0095917	0.000511334	1.09027	up	1.09027
SLC25A35	0.00960209	0.00051251	1.07734	up	1.07734
PRDM7	0.00962513	0.000516233	-0.755959	down	-0.755959
NEAT1	0.00962513	0.000515696	-1.21732	down	-1.21732
RN7SL1	0.00962513	0.000514879	-1.4661	down	-1.4661
MIR612	0.00962513	0.000515696	-1.21732	down	-1.21732
FRMD8	0.00962513	0.000515696	-1.21732	down	-1.21732
ARHGAP5-AS1	0.00962513	0.000515575	0.946306	up	0.946306
SETD9	0.00962919	0.000517075	-0.910428	down	-0.910428
TMEM220	0.00963194	0.00051847	-0.73137	down	-0.73137
ADPRM	0.00963194	0.00051847	-0.73137	down	-0.73137
SCO1	0.00963194	0.00051847	-0.73137	down	-0.73137
LOC105372493	0.00965264	0.000520835	-0.943905	down	-0.943905
SLC30A5	0.00965264	0.000520212	-0.805828	down	-0.805828
LOC283194	0.00965607	0.000521646	-1.28062	down	-1.28062
MIR548O2	0.00967767	0.000524693	-0.99868	down	-0.99868
ADIG	0.00967767	0.000524693	-0.99868	down	-0.99868
SLC39A6	0.00967767	0.000524518	-0.856002	down	-0.856002
ELP2	0.00967767	0.000524518	-0.856002	down	-0.856002
RALGAPB	0.00967767	0.000524693	-0.99868	down	-0.99868
LOC124903487	0.0097802	0.000531519	-0.70143	down	-0.70143
CEP152	0.0097802	0.000531519	-0.70143	down	-0.70143
RRM2	0.00980047	0.000533255	-0.827214	down	-0.827214
SEPTIN12	0.00995218	0.000543	-1.14344	down	-1.14344
UBN1	0.00995218	0.000543	-1.14344	down	-1.14344
ARHGAP5	0.00995218	0.000543444	0.946306	up	0.946306
ROGDI	0.00995218	0.000543	-1.14344	down	-1.14344
GLYR1	0.00995218	0.000543	-1.14344	down	-1.14344
MIR3175	0.00997331	0.000545244	-1.24866	down	-1.24866
CHD2	0.00997331	0.000545244	-1.24866	down	-1.24866
SNORA11B	0.00998942	0.000546772	-0.684071	down	-0.684071
DGLUCY	0.00998942	0.000546772	-0.684071	down	-0.684071
SCGB2B2	0.010016	0.000550175	0.697676	up	0.697676
ZNF302	0.010016	0.000550175	0.697676	up	0.697676
AFAP1	0.010016	0.000548983	1.49085	up	1.49085
CHASERR	0.0100624	0.000555979	-1.25702	down	-1.25702
CAHM	0.0100624	0.000555337	-1.18527	down	-1.18527
CHD2	0.0100624	0.000555979	-1.25702	down	-1.25702
SRRM2	0.0100624	0.000555168	1.33522	up	1.33522
UFSP1	0.0100624	0.000555286	1.32822	up	1.32822
ACHE	0.0100624	0.000555286	1.32822	up	1.32822
QKI	0.0100624	0.000555337	-1.18527	down	-1.18527
ALKBH2	0.0100807	0.000558439	-1.08551	down	-1.08551
LOC124900276	0.0100807	0.000560258	0.947555	up	0.947555
SNORA17A	0.0100807	0.000560258	0.947555	up	0.947555
SNORA17B	0.0100807	0.000560258	0.947555	up	0.947555
SNHG7	0.0100807	0.000560258	0.947555	up	0.947555
MRPL44	0.0101473	0.000564613	-1.25308	down	-1.25308
RNU7-1	0.0102044	0.000568452	1.17977	up	1.17977
C12orf57	0.0102044	0.000568452	1.17977	up	1.17977
ATN1	0.0102044	0.000568452	1.17977	up	1.17977
ENO2	0.0102044	0.000568452	1.17977	up	1.17977
MIR10394	0.0102155	0.000569734	1.60213	up	1.60213
RPS5	0.0102155	0.000569734	1.60213	up	1.60213
RNF225	0.0102155	0.000569734	1.60213	up	1.60213
ENY2	0.0102885	0.00057514	-0.887692	down	-0.887692
NUDCD1	0.0102885	0.00057514	-0.887692	down	-0.887692
NEIL3	0.0103489	0.000579185	-1.39879	down	-1.39879
MIR200CHG	0.0104065	0.000585091	1.11683	up	1.11683
C2CD5-AS1	0.0104065	0.000585105	-0.839344	down	-0.839344
MIR141	0.0104065	0.000585091	1.11683	up	1.11683
MIR200C	0.0104065	0.000585091	1.11683	up	1.11683
RSF1	0.0104065	0.000584679	-1.07045	down	-1.07045
PTPN6	0.0104065	0.000585091	1.11683	up	1.11683
INTS4	0.0104065	0.000584679	-1.07045	down	-1.07045
C2CD5	0.0104065	0.000585105	-0.839344	down	-0.839344
ZNF384	0.01042	0.000586541	-0.988005	down	-0.988005
GPR75-ASB3	0.0104409	0.000591774	-1.47775	down	-1.47775
MIR3682	0.0104409	0.000591774	-1.47775	down	-1.47775
SRGAP2-AS1	0.0104409	0.000590228	1.43579	up	1.43579
LNCTAM34A	0.0104409	0.000591123	0.959743	up	0.959743
LOC105374600	0.0104409	0.000591774	-1.47775	down	-1.47775
MIR34AHG	0.0104409	0.000591123	0.959743	up	0.959743
LINC02798	0.0104409	0.000590228	1.43579	up	1.43579
GPR75	0.0104409	0.000591774	-1.47775	down	-1.47775
MIR34A	0.0104409	0.000591123	0.959743	up	0.959743
ASB3	0.0104409	0.000591774	-1.47775	down	-1.47775
LOC107986163	0.0104529	0.00059313	-0.735279	down	-0.735279
MYLK	0.0105217	0.000597714	-1.39806	down	-1.39806
ATP5MF-PTCD1	0.0106072	0.000603948	-0.707323	down	-0.707323
CPSF4	0.0106072	0.000603948	-0.707323	down	-0.707323
PTCD1	0.0106072	0.000603948	-0.707323	down	-0.707323
RPGRIP1	0.0106298	0.000605923	-0.978147	down	-0.978147
NAT10	0.0106335	0.000606824	-1.15463	down	-1.15463
TFIP11-DT	0.0106549	0.000610803	-0.943027	down	-0.943027
TFIP11	0.0106549	0.000610803	-0.943027	down	-0.943027
FUT8	0.0106549	0.000610533	-0.719669	down	-0.719669
FUT8-AS1	0.0106549	0.000610533	-0.719669	down	-0.719669
MIR625	0.0106549	0.000610533	-0.719669	down	-0.719669
GIGYF1	0.0106944	0.00061376	0.90039	up	0.90039
RASA4CP	0.0107274	0.000616348	-0.986164	down	-0.986164
POLR2J4	0.0107274	0.000616348	-0.986164	down	-0.986164
KLHL6-AS1	0.0107381	0.000619117	1.04596	up	1.04596
PDCD10	0.0107381	0.000619762	-0.716389	down	-0.716389
FNDC3A	0.0107381	0.000620443	0.872111	up	0.872111
SERPINI1	0.0107381	0.000619762	-0.716389	down	-0.716389
KLHL6	0.0107381	0.000619117	1.04596	up	1.04596
LOC124904855	0.0108025	0.000625002	-0.943905	down	-0.943905
C20orf202	0.0108025	0.000625002	-0.943905	down	-0.943905
NOC3L	0.0108025	0.000625563	-1.13406	down	-1.13406
PSMF1	0.0108025	0.000625002	-0.943905	down	-0.943905
SLC35E3	0.0108218	0.000627381	-1.18579	down	-1.18579
NUP107	0.0108218	0.000627381	-1.18579	down	-1.18579
ASB15-AS1	0.0108704	0.000630903	-1.10053	down	-1.10053
IQUB	0.0108704	0.000630903	-1.10053	down	-1.10053
NDUFA5	0.0108704	0.000630903	-1.10053	down	-1.10053
ZNF594-DT	0.0108944	0.000633708	1.07443	up	1.07443
ZNF594	0.0108944	0.000633708	1.07443	up	1.07443
DOCK9-DT	0.0109693	0.000638773	0.726567	up	0.726567
LOC107984830	0.0109781	0.000639999	-1.27951	down	-1.27951
LINC00311	0.0109781	0.000639999	-1.27951	down	-1.27951
GSE1	0.0109781	0.000639999	-1.27951	down	-1.27951
NECTIN1	0.0111041	0.00064806	-1.58982	down	-1.58982
COPS6	0.0111544	0.000651723	1.04651	up	1.04651
LINC02035	0.0112002	0.000657246	-1.08546	down	-1.08546
TNIP1	0.0112002	0.000659795	0.649139	up	0.649139
GPN1	0.0112002	0.000660199	-0.951945	down	-0.951945
MKRN1	0.0112002	0.000656002	-0.989667	down	-0.989667
HINT1	0.0112002	0.000655574	-0.931785	down	-0.931785
MRPL17	0.0112002	0.000659105	-0.944809	down	-0.944809
FBRS	0.0112002	0.000659662	1.18466	up	1.18466
PRR14	0.0112002	0.000659662	1.18466	up	1.18466
CCDC121	0.0112002	0.000660199	-0.951945	down	-0.951945
ZNF512	0.0112002	0.000660199	-0.951945	down	-0.951945
BCL6	0.011257	0.000664276	-1.51074	down	-1.51074
LOC105379066	0.01129	0.000669153	-0.83842	down	-0.83842
SUB1	0.01129	0.000668446	-0.674509	down	-0.674509
ANKRD18B	0.01129	0.000668837	1.0875	up	1.0875
CCNH	0.01129	0.000669153	-0.83842	down	-0.83842
SLC35D2	0.0113242	0.000673311	-1.27364	down	-1.27364
TPPP	0.0113242	0.000675633	1.27393	up	1.27393
GPN1	0.0113242	0.000675773	-1.11586	down	-1.11586
RNF166	0.0113242	0.000676312	1.18753	up	1.18753
ZNF367	0.0113242	0.000673311	-1.27364	down	-1.27364
BICD2	0.0113242	0.000672352	-1.3651	down	-1.3651
CTU2	0.0113242	0.000676312	1.18753	up	1.18753
PSMD3	0.0113242	0.000674987	1.12432	up	1.12432
SPATA31H1	0.0113242	0.000675773	-1.11586	down	-1.11586
ZNF512	0.0113242	0.000675773	-1.11586	down	-1.11586
LOC105377548	0.0113427	0.000682559	-1.24961	down	-1.24961
PRORP-PSMA6	0.0113427	0.000679334	-0.7039	down	-0.7039
HPGD	0.0113427	0.000682559	-1.24961	down	-1.24961
LTBR	0.0113427	0.000678881	0.728759	up	0.728759
PSMA6	0.0113427	0.000679334	-0.7039	down	-0.7039
H2AC14	0.0113427	0.000682398	-1.23429	down	-1.23429
H2BC14	0.0113427	0.000682398	-1.23429	down	-1.23429
SOX13	0.0113427	0.00068135	-1.22087	down	-1.22087
PRORP	0.0113427	0.000679334	-0.7039	down	-0.7039
UBE2F-SCLY	0.0113839	0.00068578	-0.73024	down	-0.73024
ESPNL	0.0113839	0.00068578	-0.73024	down	-0.73024
SCLY	0.0113839	0.00068578	-0.73024	down	-0.73024
NAA40	0.0113954	0.000687206	-1.18705	down	-1.18705
SF3B4	0.0114025	0.000688374	-1.20838	down	-1.20838
MTMR11	0.0114025	0.000688374	-1.20838	down	-1.20838
OTUD7B	0.0114025	0.000688374	-1.20838	down	-1.20838
CDK19	0.0114355	0.000691848	-1.51134	down	-1.51134
TPSG1	0.0114355	0.000691206	1.26784	up	1.26784
TPSB2	0.0114355	0.000691206	1.26784	up	1.26784
RPS28	0.0114904	0.000695916	1.29633	up	1.29633
CGB8	0.011529	0.000698997	1.28418	up	1.28418
DOCK9	0.0115769	0.00070265	0.726567	up	0.726567
ATAD2	0.0115915	0.000704289	-0.904642	down	-0.904642
MIR548D1	0.0115915	0.000704289	-0.904642	down	-0.904642
STAG3	0.0116323	0.00070752	-1.01617	down	-1.01617
PVRIG	0.0116323	0.00070752	-1.01617	down	-1.01617
CTSK	0.0116617	0.000710693	1.2689	up	1.2689
ELFN1	0.0116617	0.000711574	0.991808	up	0.991808
ARNT	0.0116617	0.000710693	1.2689	up	1.2689
BBS7	0.0116617	0.000711092	-1.11483	down	-1.11483
CCNA2	0.0116617	0.000711092	-1.11483	down	-1.11483
FKBP1B	0.0116839	0.0007152	-0.729471	down	-0.729471
MFSD2B	0.0116839	0.0007152	-0.729471	down	-0.729471
TMEM39A	0.0116839	0.000715181	1.0461	up	1.0461
WDCP	0.0116839	0.0007152	-0.729471	down	-0.729471
ZWINT	0.0116898	0.000717075	-0.777899	down	-0.777899
LOC124902546	0.0116898	0.000717075	-0.777899	down	-0.777899
ERCC6L	0.0117141	0.000719328	-1.13018	down	-1.13018
ADAM11	0.0117227	0.000720617	1.38052	up	1.38052
EXT2	0.0117763	0.000724672	-1.17401	down	-1.17401
CDK18	0.0118027	0.000727063	1.10861	up	1.10861
PPM1L	0.0118063	0.000728045	-0.712329	down	-0.712329
RBM6	0.011821	0.000730485	1.04626	up	1.04626
RBM5	0.011821	0.000730485	1.04626	up	1.04626
C3orf38	0.011821	0.00072995	-1.44211	down	-1.44211
MCFD2	0.0119233	0.000737582	1.27078	up	1.27078
MRPS30-DT	0.0119681	0.000743455	-0.964785	down	-0.964785
MRPS30	0.0119681	0.000743455	-0.964785	down	-0.964785
FOXA1	0.0119681	0.000741998	0.914365	up	0.914365
TTC6	0.0119681	0.000741998	0.914365	up	0.914365
LOC124900347	0.0119692	0.000744297	1.24483	up	1.24483
PPP1R13B	0.0119692	0.000744297	1.24483	up	1.24483
TMEM14A	0.0120804	0.000751995	-1.08511	down	-1.08511
LOC730101	0.0120804	0.000751995	-1.08511	down	-1.08511
RAD51L3-RFFL	0.0120905	0.000753406	1.33466	up	1.33466
RFFL	0.0120905	0.000753406	1.33466	up	1.33466
RAD51D	0.0120905	0.000753406	1.33466	up	1.33466
MIR3122	0.0121246	0.000757885	-0.939278	down	-0.939278
INTS7	0.0121246	0.000757885	-0.939278	down	-0.939278
NR3C1	0.0121246	0.000756682	1.77547	up	1.77547
DTL	0.0121246	0.000757885	-0.939278	down	-0.939278
BCL2	0.0121559	0.000760629	-1.4638	down	-1.4638
LINC02983	0.0122001	0.000765245	0.777812	up	0.777812
DLG1-AS1	0.0122001	0.000765769	0.764755	up	0.764755
MIR4797	0.0122001	0.000765769	0.764755	up	0.764755
DLG1	0.0122001	0.000765769	0.764755	up	0.764755
FBXL18	0.0122001	0.000765245	0.777812	up	0.777812
TNRC18	0.0122001	0.000765245	0.777812	up	0.777812
GRPEL2-AS1	0.0122038	0.000767577	-0.799758	down	-0.799758
LOC124901103	0.0122038	0.000767577	-0.799758	down	-0.799758
AFAP1L1	0.0122038	0.000767577	-0.799758	down	-0.799758
GRPEL2	0.0122038	0.000767577	-0.799758	down	-0.799758
LGMN	0.0122325	0.000771759	-0.677959	down	-0.677959
PEX2	0.0122325	0.000770753	-1.49085	down	-1.49085
DIAPH3	0.0122325	0.000771465	-0.927927	down	-0.927927
PDGFC	0.0123009	0.000776872	1.11696	up	1.11696
KIF23-AS1	0.0123125	0.000779199	-1.25091	down	-1.25091
KIF23	0.0123125	0.000779199	-1.25091	down	-1.25091
FAM228B	0.0123796	0.000785851	-0.853406	down	-0.853406
SKP2	0.0123796	0.000785786	-0.701219	down	-0.701219
FAM228A	0.0123796	0.000785851	-0.853406	down	-0.853406
MIR580	0.0123796	0.000785786	-0.701219	down	-0.701219
LMBRD2	0.0123796	0.000785786	-0.701219	down	-0.701219
JUND	0.0124674	0.000792236	1.13144	up	1.13144
KANK3	0.0125034	0.000795333	1.29633	up	1.29633
NDUFA7	0.0125034	0.000795333	1.29633	up	1.29633
CD320	0.0125034	0.000795333	1.29633	up	1.29633
SNORA15B-2	0.012521	0.000798072	-0.745595	down	-0.745595
NBPF15	0.012521	0.000797421	-0.954486	down	-0.954486
CCT6P1	0.012521	0.000798072	-0.745595	down	-0.745595
SNORA22	0.012521	0.000798072	-0.745595	down	-0.745595
MEMO1	0.0125463	0.000800498	-0.878474	down	-0.878474
DPY30	0.0125463	0.000800498	-0.878474	down	-0.878474
PPP1R13B-DT	0.012667	0.000809019	1.24483	up	1.24483
LINC00881	0.0127109	0.000812647	-0.678862	down	-0.678862
LINC02029	0.0127109	0.000812647	-0.678862	down	-0.678862
COPB2-DT	0.0127531	0.00081617	-0.58847	down	-0.58847
IPO9-AS1	0.0127918	0.000820553	1.28092	up	1.28092
LOC124904483	0.0127918	0.000820553	1.28092	up	1.28092
FAM32A	0.0127918	0.000821261	-0.907678	down	-0.907678
BLM	0.0127918	0.000821962	-0.932216	down	-0.932216
FASTKD1	0.0127918	0.000820531	-0.936788	down	-0.936788
SRRM2-AS1	0.0128159	0.00082434	1.33522	up	1.33522
MIR5092	0.0128788	0.000830055	0.681629	up	0.681629
DEDD2	0.0128788	0.000829709	1.462	up	1.462
ERF	0.0128788	0.000829709	1.462	up	1.462
GSK3A	0.0128788	0.000829709	1.462	up	1.462
SLC12A8	0.0128788	0.000830055	0.681629	up	0.681629
PPP2R2A	0.0128846	0.000831265	-1.19539	down	-1.19539
SAAL1	0.0129094	0.0008337	-1.27561	down	-1.27561
LINC01176	0.0129185	0.000835122	-1.00469	down	-1.00469
DKFZP586I1420	0.0129185	0.000835122	-1.00469	down	-1.00469
ZNRF2	0.0129185	0.000835122	-1.00469	down	-1.00469
MIR550A1	0.0129185	0.000835122	-1.00469	down	-1.00469
TTC33	0.0129232	0.000836263	-1.51466	down	-1.51466
ADAP1	0.0129736	0.000840367	1.5009	up	1.5009
COX19	0.0129736	0.000840367	1.5009	up	1.5009
MIOX	0.0130626	0.000846982	1.4561	up	1.4561
ADM2	0.0130626	0.000846982	1.4561	up	1.4561
MIR3188	0.013078	0.000848824	1.13144	up	1.13144
MIR4521	0.0130883	0.000850693	1.00156	up	1.00156
LOC105374353	0.0130883	0.000851191	1.2941	up	1.2941
CFAP99	0.0130883	0.000851191	1.2941	up	1.2941
RNF4	0.0130883	0.000851191	1.2941	up	1.2941
FAM193A	0.0130883	0.000851191	1.2941	up	1.2941
LOC107985154	0.0131193	0.000855552	1.30388	up	1.30388
LOC128125822	0.0131193	0.000855751	-0.788611	down	-0.788611
PTP4A1	0.0131193	0.000855751	-0.788611	down	-0.788611
TUBB6	0.0131193	0.000855552	1.30388	up	1.30388
DPY19L3	0.0132397	0.000865324	1.1291	up	1.1291
DPY19L3-DT	0.0132397	0.000865324	1.1291	up	1.1291
FAM24B-CUZD1	0.0132978	0.000872563	-0.824756	down	-0.824756
FAM24B	0.0132978	0.000872563	-0.824756	down	-0.824756
C10orf88B	0.0132978	0.000872563	-0.824756	down	-0.824756
CUZD1	0.0132978	0.000872563	-0.824756	down	-0.824756
ZDHHC7	0.0132978	0.000871937	-0.975325	down	-0.975325
MRS2	0.0133146	0.000874529	-0.661321	down	-0.661321
RCAN3AS	0.0133479	0.000886056	-1.37782	down	-1.37782
LOC101927157	0.0133479	0.000885584	-0.803475	down	-0.803475
ADNP-AS1	0.0133479	0.000884925	1.33183	up	1.33183
MADCAM1-AS1	0.0133479	0.000884436	0.899326	up	0.899326
RCAN3	0.0133479	0.000886056	-1.37782	down	-1.37782
CNGA1	0.0133479	0.000885584	-0.803475	down	-0.803475
NIPAL1	0.0133479	0.000885584	-0.803475	down	-0.803475
ADNP	0.0133479	0.000884925	1.33183	up	1.33183
GATA2	0.0133479	0.000879577	0.750193	up	0.750193
PPP2R5B	0.0133479	0.000886227	1.06076	up	1.06076
MADCAM1	0.0133479	0.000884436	0.899326	up	0.899326
ZW10	0.0133479	0.000881754	-0.932557	down	-0.932557
TPGS1	0.0133479	0.000884436	0.899326	up	0.899326
NINJ2-AS1	0.0133575	0.000888594	0.733235	up	0.733235
CHPF2	0.0133575	0.000888464	1.19631	up	1.19631
MIR671	0.0133575	0.000888464	1.19631	up	1.19631
TPRG1	0.0134296	0.000895133	-1.25597	down	-1.25597
CRB3	0.0134296	0.000894981	0.995136	up	0.995136
LOC112267944	0.0134317	0.000896146	-0.836863	down	-0.836863
GSTP1	0.0134326	0.000897076	0.803273	up	0.803273
YOD1	0.0135374	0.000904948	-0.85327	down	-0.85327
SKA2	0.0136378	0.000913516	-1.33503	down	-1.33503
MIR301A	0.0136378	0.000913516	-1.33503	down	-1.33503
TRIM37	0.0136378	0.000913516	-1.33503	down	-1.33503
SMG8	0.0136378	0.000913516	-1.33503	down	-1.33503
PRR11	0.0136378	0.000913516	-1.33503	down	-1.33503
MIR454	0.0136378	0.000913516	-1.33503	down	-1.33503
TJAP1	0.0136378	0.000914312	-0.990253	down	-0.990253
STRAP	0.0136781	0.000918781	-0.961612	down	-0.961612
COPB2	0.0136781	0.000918191	-0.58847	down	-0.58847
ZBTB44	0.0137118	0.000922821	1.19539	up	1.19539
ZBTB44-DT	0.0137118	0.000922821	1.19539	up	1.19539
APTR	0.013725	0.000925489	-0.689571	down	-0.689571
RSBN1L	0.013725	0.000925489	-0.689571	down	-0.689571
LOC101927702	0.0137286	0.000927983	-1.00958	down	-1.00958
SEPTIN2	0.0137286	0.0009284	1.10516	up	1.10516
PPM1A	0.0137286	0.000927983	-1.00958	down	-1.00958
FARP2	0.0137286	0.0009284	1.10516	up	1.10516
MAT2B	0.013733	0.000929632	-0.605589	down	-0.605589
H3C1	0.013733	0.000930478	-1.30647	down	-1.30647
H4C1	0.013733	0.000930478	-1.30647	down	-1.30647
ATP5MF-PTCD1	0.0137499	0.000933375	-0.707323	down	-0.707323
PTCD1	0.0137499	0.000933375	-0.707323	down	-0.707323
DNAJC1	0.0137499	0.000933403	-1.10915	down	-1.10915
ATP5MF	0.0137499	0.000933375	-0.707323	down	-0.707323
LINC00880	0.0137996	0.000937669	-0.678862	down	-0.678862
RAB24	0.01391	0.000946977	-0.905127	down	-0.905127
SBF1	0.01391	0.000946627	1.4561	up	1.4561
MXD3	0.01391	0.000946977	-0.905127	down	-0.905127
LOC107985154	0.0139502	0.000950613	1.30388	up	1.30388
TUBB6	0.0139502	0.000950613	1.30388	up	1.30388
LAMTOR2	0.0139506	0.000952449	1.06422	up	1.06422
UBQLN4	0.0139506	0.000952449	1.06422	up	1.06422
RAB25	0.0139506	0.000952449	1.06422	up	1.06422
THAP4	0.0139539	0.000953581	-0.967214	down	-0.967214
LOC102724517	0.014013	0.000959431	-0.667292	down	-0.667292
NLK	0.014013	0.000959431	-0.667292	down	-0.667292
RPL15	0.0140462	0.000962615	-0.780846	down	-0.780846
SSC4D	0.0140669	0.000964945	-0.768423	down	-0.768423
STAG1	0.0141091	0.000968757	-0.694154	down	-0.694154
ZNF460-AS1	0.0141121	0.000970789	0.823014	up	0.823014
ZNF460	0.0141121	0.000970789	0.823014	up	0.823014
ARPIN-AP3S2	0.0141414	0.000974641	-0.919497	down	-0.919497
AP3S2	0.0141414	0.000974641	-0.919497	down	-0.919497
SDK1-AS1	0.0141414	0.000974052	-1.36177	down	-1.36177
ARPIN	0.0141414	0.000974641	-0.919497	down	-0.919497
SMCHD1	0.0141441	0.000976657	-0.816661	down	-0.816661
CBX3P2	0.0141441	0.000976657	-0.816661	down	-0.816661
FBXO41	0.0142469	0.000984676	1.42976	up	1.42976
EOLA2-DT	0.0142869	0.000989577	-1.32957	down	-1.32957
UPRT	0.0142869	0.000990216	-1.24707	down	-1.24707
EOLA2	0.0142869	0.000989577	-1.32957	down	-1.32957
TLE5	0.0143128	0.000994796	1.31889	up	1.31889
NEAT1	0.0143128	0.000994557	-1.21732	down	-1.21732
CRBN	0.0143128	0.000992989	-1.26365	down	-1.26365
FRMD8	0.0143128	0.000994557	-1.21732	down	-1.21732
FPGT-TNNI3K	0.0143365	0.00100109	-0.924532	down	-0.924532
LOC105374775	0.0143365	0.00100075	-1.34528	down	-1.34528
LRRIQ3	0.0143365	0.00100109	-0.924532	down	-0.924532
TNNI3K	0.0143365	0.00100109	-0.924532	down	-0.924532
MROH1	0.0143365	0.000999849	-0.899262	down	-0.899262
FPGT	0.0143365	0.00100109	-0.924532	down	-0.924532
RABGAP1L-DT	0.0143404	0.00100229	-0.742703	down	-0.742703
LOC442028	0.014353	0.00100503	-1.08929	down	-1.08929
INTS2	0.014353	0.00100465	-0.993558	down	-0.993558
BRIP1	0.014353	0.00100465	-0.993558	down	-0.993558
GATA2-AS1	0.014438	0.00101285	0.750193	up	0.750193
GANAB	0.014438	0.00101261	-1.00536	down	-1.00536
EML3	0.014438	0.00101261	-1.00536	down	-1.00536
B3GAT3	0.014438	0.00101261	-1.00536	down	-1.00536
MIR6090	0.0144946	0.00101776	-0.989774	down	-0.989774
ZNF555	0.0145777	0.00102453	1.2259	up	1.2259
ARMCX5-GPRASP2	0.0145953	0.00102752	0.894976	up	0.894976
GPRASP2	0.0145953	0.00102752	0.894976	up	0.894976
TNFSF10	0.0145953	0.00102766	-1.05293	down	-1.05293
STAG3	0.0146024	0.00102912	-1.01617	down	-1.01617
SOHLH1	0.0146024	0.00103006	1.17258	up	1.17258
PVRIG	0.0146024	0.00102912	-1.01617	down	-1.01617
CDPF1	0.0146114	0.00103164	0.865097	up	0.865097
LOC101929918	0.0146317	0.00103591	1.63574	up	1.63574
LOC124902660	0.0146317	0.00103591	1.63574	up	1.63574
CAPRIN1	0.0146317	0.00103591	1.63574	up	1.63574
XRCC2	0.014676	0.00104	-0.954126	down	-0.954126
IGFBP-AS1	0.0146949	0.00104678	-1.10259	down	-1.10259
TESHL	0.0146949	0.00104678	-1.10259	down	-1.10259
E2F5-DT	0.0146949	0.00104455	-0.937842	down	-0.937842
DIRC3-AS1	0.0146949	0.00104678	-1.10259	down	-1.10259
E2F5	0.0146949	0.00104455	-0.937842	down	-0.937842
JMJD6	0.0146949	0.00104705	0.922552	up	0.922552
IGFBP5	0.0146949	0.00104678	-1.10259	down	-1.10259
MXRA7	0.0146949	0.00104705	0.922552	up	0.922552
MIR4466	0.0147544	0.00105225	1.25731	up	1.25731
LOC115308161	0.0147544	0.00105225	1.25731	up	1.25731
NIBAN1	0.0148021	0.00105661	1.34881	up	1.34881
PRMT2	0.0148218	0.00105993	-0.806833	down	-0.806833
INAVA	0.0148218	0.00105961	1.03878	up	1.03878
MROH3P	0.0148218	0.00105961	1.03878	up	1.03878
MIR6790	0.0148387	0.00106307	1.23541	up	1.23541
MIR6885	0.0148387	0.00106307	1.23541	up	1.23541
GTF2F1	0.0148387	0.00106307	1.23541	up	1.23541
LOC390877	0.0148387	0.00106307	1.23541	up	1.23541
LOC100289561	0.0148794	0.00106754	-1.04286	down	-1.04286
LOC100630923	0.0148794	0.00106754	-1.04286	down	-1.04286
SLAIN2	0.0148794	0.00106791	-0.710984	down	-0.710984
EZH2	0.0149343	0.00107282	-1.13192	down	-1.13192
LOC105374796	0.0150395	0.00108499	-0.771922	down	-0.771922
SQLE-DT	0.0150395	0.00108482	-0.871686	down	-0.871686
PLEKHM2	0.0150395	0.00108524	1.1199	up	1.1199
PPP1R37	0.0150395	0.00108153	1.66226	up	1.66226
SLC25A34	0.0150395	0.00108524	1.1199	up	1.1199
BLOC1S3	0.0150395	0.00108153	1.66226	up	1.66226
MARK4	0.0150395	0.00108153	1.66226	up	1.66226
SQLE	0.0150395	0.00108482	-0.871686	down	-0.871686
GEMIN7	0.0150395	0.00108153	1.66226	up	1.66226
PPM1D	0.0150523	0.00108812	-0.814341	down	-0.814341
AQR	0.0150523	0.00108796	-0.667009	down	-0.667009
TMEM139	0.0150752	0.00109075	-0.894842	down	-0.894842
CASP2	0.0150752	0.00109075	-0.894842	down	-0.894842
POLR3H	0.0150939	0.00109308	-1.05925	down	-1.05925
LOC105376289	0.0150973	0.0010943	1.01221	up	1.01221
IER5L-AS1	0.0150973	0.0010943	1.01221	up	1.01221
PTPA	0.0150973	0.0010943	1.01221	up	1.01221
L3HYPDH	0.0151834	0.00110349	-0.680987	down	-0.680987
JKAMP	0.0151834	0.00110349	-0.680987	down	-0.680987
GPR135	0.0151834	0.00110349	-0.680987	down	-0.680987
CCDC175	0.0151834	0.00110349	-0.680987	down	-0.680987
LOC105376289	0.0152012	0.00110972	1.01221	up	1.01221
IER5L-AS1	0.0152012	0.00110972	1.01221	up	1.01221
PTPA	0.0152012	0.00110972	1.01221	up	1.01221
NCEH1	0.0152012	0.00110945	-0.631633	down	-0.631633
COQ8B	0.0152012	0.00110859	-1.41938	down	-1.41938
ITPKC	0.0152012	0.00110859	-1.41938	down	-1.41938
CBX2	0.0152012	0.0011072	-1.01887	down	-1.01887
NUMBL	0.0152012	0.00110859	-1.41938	down	-1.41938
LOC124907725	0.015244	0.00111382	-0.648118	down	-0.648118
SNUPN	0.0152909	0.00111933	1.58595	up	1.58595
C14orf28	0.0152909	0.00111886	-0.878251	down	-0.878251
SLC31A1	0.0152909	0.00112121	-0.80198	down	-0.80198
FKBP15	0.0152909	0.00112121	-0.80198	down	-0.80198
PTPN9	0.0152909	0.00111933	1.58595	up	1.58595
MIR4729	0.015294	0.00112342	0.900043	up	0.900043
LOC102724146	0.015294	0.00112295	-0.961612	down	-0.961612
EPS8	0.015294	0.00112295	-0.961612	down	-0.961612
YPEL2	0.015294	0.00112342	0.900043	up	0.900043
KIN	0.0153652	0.00113064	-1.2474	down	-1.2474
ATP5F1C	0.0153652	0.00113064	-1.2474	down	-1.2474
LOC124900936	0.0154411	0.00114023	-0.625027	down	-0.625027
MTRR	0.0154411	0.00114023	-0.625027	down	-0.625027
DUOX1	0.0154411	0.00114017	-1.28735	down	-1.28735
FASTKD3	0.0154411	0.00114023	-0.625027	down	-0.625027
NAA15	0.0154411	0.00113797	-1.05661	down	-1.05661
MIR2278	0.0154679	0.00114367	-1.4633	down	-1.4633
MIR4657	0.0154679	0.00114521	1.00658	up	1.00658
MIR6081	0.0154679	0.00114367	-1.4633	down	-1.4633
GMEB1	0.0154679	0.00114521	1.16315	up	1.16315
LOC124904809	0.0154679	0.00114521	1.16315	up	1.16315
MIR23B	0.0154679	0.00114367	-1.4633	down	-1.4633
MIR24-1	0.0154679	0.00114367	-1.4633	down	-1.4633
MIR27B	0.0154679	0.00114367	-1.4633	down	-1.4633
PURB	0.0154679	0.00114521	1.00658	up	1.00658
AOPEP	0.0154679	0.00114367	-1.4633	down	-1.4633
MCCC1	0.0154746	0.00114671	-0.60142	down	-0.60142
MIR5087	0.0155554	0.00115371	0.795368	up	0.795368
LOC105371225	0.0155554	0.00115371	0.795368	up	0.795368
MIR4781	0.0156673	0.00116505	-0.809	down	-0.809
TCEANC2	0.0156673	0.00116505	-0.809	down	-0.809
TMEM59	0.0156673	0.00116505	-0.809	down	-0.809
CNOT11	0.0158016	0.00117606	1.00284	up	1.00284
MRTFB	0.0158388	0.00117986	1.30647	up	1.30647
PAX2	0.0158603	0.00118248	1.25837	up	1.25837
ITPRIPL2	0.0159274	0.0011903	0.78884	up	0.78884
RAPGEF6	0.0159274	0.00119058	0.898861	up	0.898861
SYT17	0.0159274	0.0011903	0.78884	up	0.78884
GPR52	0.0159274	0.00119022	-0.742703	down	-0.742703
FNIP1	0.0159274	0.00119058	0.898861	up	0.898861
RABGAP1L	0.0159274	0.00119022	-0.742703	down	-0.742703
MIR6513	0.0159316	0.00119227	0.923373	up	0.923373
KLHDC3	0.0159316	0.00119663	-0.881394	down	-0.881394
GRK2	0.0159316	0.0011959	-1.06994	down	-1.06994
ANKRD13D	0.0159316	0.0011959	-1.06994	down	-1.06994
MEA1	0.0159316	0.00119663	-0.881394	down	-0.881394
PPP2R5D	0.0159316	0.00119663	-0.881394	down	-0.881394
PRKAG1	0.0159316	0.00119709	1.39666	up	1.39666
ZNF839	0.0159316	0.00119431	1.01999	up	1.01999
TMBIM1	0.0159316	0.00119227	0.923373	up	0.923373
KMT2D	0.0159316	0.00119709	1.39666	up	1.39666
RRP36	0.0159316	0.00119663	-0.881394	down	-0.881394
LOC105369595	0.0159361	0.00120222	0.733235	up	0.733235
LOC105369669	0.0159361	0.00120162	-1.12738	down	-1.12738
H4C16	0.0159361	0.00120162	-1.12738	down	-1.12738
LOC128031834	0.0159361	0.00120227	-1.44211	down	-1.44211
SLC26A11	0.0159361	0.00119923	-1.38168	down	-1.38168
NINJ2	0.0159361	0.00120222	0.733235	up	0.733235
BAX	0.0159361	0.00120259	1.18581	up	1.18581
CGGBP1	0.0159361	0.00120227	-1.44211	down	-1.44211
LINC02983	0.0160085	0.0012128	0.855097	up	0.855097
PCOLCE-AS1	0.0160085	0.00121446	1.1184	up	1.1184
PLA2G4E-AS1	0.0160085	0.00122153	-0.93722	down	-0.93722
CHERP	0.0160085	0.00121394	1.28836	up	1.28836
LOC124902312	0.0160085	0.00121848	1.02438	up	1.02438
CYB5D2	0.0160085	0.00121916	0.760692	up	0.760692
INPP5F	0.0160085	0.00121757	-0.806295	down	-0.806295
ZZEF1	0.0160085	0.00121916	0.760692	up	0.760692
FBXO24	0.0160085	0.00121446	1.1184	up	1.1184
EHD4	0.0160085	0.00122153	-0.93722	down	-0.93722
LCNL1	0.0160085	0.00121848	1.02438	up	1.02438
NKX6-1	0.0160085	0.00121752	-0.930507	down	-0.930507
PCOLCE	0.0160085	0.00121446	1.1184	up	1.1184
SPTBN5	0.0160085	0.00122153	-0.93722	down	-0.93722
PTGDS	0.0160085	0.00121848	1.02438	up	1.02438
RNF2	0.0160085	0.00122023	-1.06858	down	-1.06858
TNRC18	0.0160085	0.0012128	0.855097	up	0.855097
MED26	0.0160085	0.00121394	1.28836	up	1.28836
HDAC5	0.0161333	0.00123543	-1.42007	down	-1.42007
RBM6	0.0161333	0.00123269	1.04626	up	1.04626
RBM5	0.0161333	0.00123269	1.04626	up	1.04626
ENTPD8	0.0161333	0.00123628	1.26387	up	1.26387
KCNT1	0.0161333	0.00123607	1.17258	up	1.17258
TSPAN14	0.0161333	0.0012362	-1.22175	down	-1.22175
MIR3175	0.0161844	0.00124627	-1.24866	down	-1.24866
CHASERR	0.0161844	0.00124627	-1.24866	down	-1.24866
SEPTIN7-DT	0.0161844	0.00124534	0.854732	up	0.854732
LOC102724261	0.0161844	0.00124648	1.37863	up	1.37863
CHD2	0.0161844	0.00124627	-1.24866	down	-1.24866
GYS2	0.0161844	0.00124648	1.37863	up	1.37863
LDHB	0.0161844	0.00124648	1.37863	up	1.37863
SEPTIN7	0.0161844	0.00124534	0.854732	up	0.854732
AP2M1	0.0162207	0.00125033	-0.595192	down	-0.595192
DVL3	0.0162207	0.00125033	-0.595192	down	-0.595192
ABCF3	0.0162207	0.00125033	-0.595192	down	-0.595192
IPO9-AS1	0.0162342	0.00125242	1.28092	up	1.28092
LOC124904483	0.0162342	0.00125242	1.28092	up	1.28092
MACROD2	0.0162868	0.00125754	-0.920931	down	-0.920931
MACROD2-IT1	0.0162868	0.00125754	-0.920931	down	-0.920931
ZNF396	0.0162977	0.00125943	1.28141	up	1.28141
LOC124900605	0.0163884	0.00126963	-0.829352	down	-0.829352
LOC124908062	0.0163884	0.00126963	-0.829352	down	-0.829352
NABP1	0.0163884	0.00126963	-0.829352	down	-0.829352
MIR21	0.0165243	0.00128122	-1.0949	down	-1.0949
VMP1	0.0165243	0.00128122	-1.0949	down	-1.0949
KAZN	0.0165276	0.00128256	1.42614	up	1.42614
CCDC28A-AS1	0.016551	0.00128652	-1.28723	down	-1.28723
CCDC28A	0.016551	0.00128652	-1.28723	down	-1.28723
ECT2L	0.016551	0.00128652	-1.28723	down	-1.28723
TMEM221	0.0166119	0.00129447	1.48283	up	1.48283
NXNL1	0.0166119	0.00129447	1.48283	up	1.48283
DHPS	0.0166119	0.00129336	1.08316	up	1.08316
MAN2B1	0.0166119	0.00129336	1.08316	up	1.08316
WDR83OS	0.0166119	0.00129336	1.08316	up	1.08316
CCDC194	0.0166333	0.00129722	-0.965628	down	-0.965628
P2RX5-TAX1BP3	0.016678	0.00130935	0.931738	up	0.931738
MIR6740	0.016678	0.00130303	-1.33725	down	-1.33725
SNORA70H	0.016678	0.00130303	-1.33725	down	-1.33725
SNORD38C	0.016678	0.00130631	1.11474	up	1.11474
CCDC24	0.016678	0.00130826	0.999251	up	0.999251
ELF3	0.016678	0.00130303	-1.33725	down	-1.33725
ZNF841	0.016678	0.00130188	1.10684	up	1.10684
TAX1BP3	0.016678	0.00130935	0.931738	up	0.931738
P2RX5	0.016678	0.00130935	0.931738	up	0.931738
DCP1A	0.016678	0.00130631	1.11474	up	1.11474
RNPEP	0.016678	0.00130303	-1.33725	down	-1.33725
CACNA1D	0.016678	0.00130631	1.11474	up	1.11474
ZNF614	0.016678	0.00130188	1.10684	up	1.10684
EMC6	0.016678	0.00130935	0.931738	up	0.931738
B4GALT2	0.016678	0.00130826	0.999251	up	0.999251
ZNF432	0.016678	0.00130188	1.10684	up	1.10684
TMX3	0.0166887	0.00131235	-1.32639	down	-1.32639
CCDC102B	0.0166887	0.00131235	-1.32639	down	-1.32639
POLR3G	0.0166956	0.00131555	-1.04881	down	-1.04881
MBLAC2	0.0166956	0.00131555	-1.04881	down	-1.04881
RHBDD2	0.0166956	0.00131614	1.42384	up	1.42384
RAD51L3-RFFL	0.0166976	0.00131846	1.33466	up	1.33466
RFFL	0.0166976	0.00131846	1.33466	up	1.33466
RAD51D	0.0166976	0.00131846	1.33466	up	1.33466
LOC105376286	0.0167218	0.0013247	1.36536	up	1.36536
GOLGA2	0.0167218	0.0013247	1.36536	up	1.36536
SWI5	0.0167218	0.0013247	1.36536	up	1.36536
SPCS3	0.0167218	0.00132253	-1.01337	down	-1.01337
IL12A	0.016729	0.00132636	-1.01327	down	-1.01327
LOC101929710	0.0167406	0.00133053	-0.834733	down	-0.834733
ELL2	0.0167406	0.00133053	-0.834733	down	-0.834733
LINC03006	0.0167406	0.00133012	-0.745595	down	-0.745595
MIR583	0.0167406	0.00133053	-0.834733	down	-0.834733
CAST	0.0167406	0.00133053	-0.834733	down	-0.834733
MIR6747	0.0167711	0.00133553	1.45995	up	1.45995
OVCA2	0.0167711	0.00133621	1.50455	up	1.50455
DPH1	0.0167711	0.00133621	1.50455	up	1.50455
EEF1G	0.0167711	0.00133553	1.45995	up	1.45995
TUT1	0.0167711	0.00133553	1.45995	up	1.45995
TDG	0.0167711	0.00133422	-0.81495	down	-0.81495
UBE2F-SCLY	0.0167776	0.0013389	-0.73024	down	-0.73024
UBE2F	0.0167776	0.0013389	-0.73024	down	-0.73024
HDLBP	0.0167776	0.00133862	1.10516	up	1.10516
ESPNL	0.0167776	0.0013389	-0.73024	down	-0.73024
SCLY	0.0167776	0.0013389	-0.73024	down	-0.73024
MIR3124	0.0168096	0.00134472	-0.96696	down	-0.96696
PPP4R2	0.0168096	0.00134368	1.10361	up	1.10361
EBLN2	0.0168096	0.00134368	1.10361	up	1.10361
GXYLT2	0.0168096	0.00134368	1.10361	up	1.10361
EIF5A2	0.016884	0.00135177	-0.939599	down	-0.939599
TMTC4	0.0168914	0.00135346	-0.723775	down	-0.723775
DNAJB6	0.0169372	0.00135823	-1.01394	down	-1.01394
DIMT1	0.0170281	0.00136661	-1.04007	down	-1.04007
TMCC1	0.0170475	0.00136928	-1.41992	down	-1.41992
ABL2	0.0170612	0.00137258	-0.997614	down	-0.997614
VSNL1	0.0170612	0.00137215	-0.979913	down	-0.979913
MIR6510	0.0171186	0.00137831	-1.15726	down	-1.15726
KRT15	0.0171186	0.00137831	-1.15726	down	-1.15726
ZNF556	0.0171296	0.00138031	-1.23484	down	-1.23484
HSD17B13	0.0171992	0.00138703	-1.24066	down	-1.24066
HSD17B11	0.0171992	0.00138703	-1.24066	down	-1.24066
LOC124900202	0.0172037	0.00138962	-1.15678	down	-1.15678
PRKAA1	0.0172037	0.00138962	-1.15678	down	-1.15678
MKRN3	0.0172037	0.0013894	-1.01881	down	-1.01881
LOC101929200	0.0172384	0.00139647	-0.576246	down	-0.576246
ICE1	0.0172384	0.00139647	-0.576246	down	-0.576246
JAK3	0.0172384	0.001394	0.982667	up	0.982667
ATP6V1B2	0.0172384	0.00139689	-1.3546	down	-1.3546
HAGH	0.0172516	0.00140149	1.39637	up	1.39637
IGFALS	0.0172516	0.00140149	1.39637	up	1.39637
JPT1	0.0172516	0.00139975	1.24349	up	1.24349
DNAJB12	0.0172516	0.00140244	1.38718	up	1.38718
SUMO2	0.0172516	0.00139975	1.24349	up	1.24349
FAHD1	0.0172516	0.00140149	1.39637	up	1.39637
SPSB3	0.0172516	0.00140149	1.39637	up	1.39637
ZNF575	0.0173277	0.00141086	-1.00213	down	-1.00213
MAG	0.0173277	0.00141051	1.15554	up	1.15554
LOC105371716	0.0174169	0.0014249	1.53668	up	1.53668
LOC124901611	0.0174169	0.00142318	-0.854897	down	-0.854897
LOC124903670	0.0174169	0.00142382	1.25408	up	1.25408
DHRS13	0.0174169	0.0014249	1.53668	up	1.53668
BBS9	0.0174169	0.00142318	-0.854897	down	-0.854897
SBK1	0.0174169	0.00142382	1.25408	up	1.25408
PIPOX	0.0174169	0.0014249	1.53668	up	1.53668
FLJ20712	0.0174169	0.00142318	-0.854897	down	-0.854897
PHF12	0.0174169	0.0014249	1.53668	up	1.53668
LOC101927157	0.0174261	0.00142677	-0.803475	down	-0.803475
NIPAL1	0.0174261	0.00142677	-0.803475	down	-0.803475
ORC6	0.0174785	0.00143446	-0.699353	down	-0.699353
VPS35	0.0174785	0.00143446	-0.699353	down	-0.699353
KLHL36	0.0174785	0.00143413	0.935167	up	0.935167
ING1	0.017637	0.00144862	-0.807657	down	-0.807657
NFE2L3	0.0176499	0.00145082	-1.06447	down	-1.06447
SRRM5	0.0176861	0.00145777	1.00877	up	1.00877
IRGQ	0.0176861	0.00145777	1.00877	up	1.00877
MOB3C	0.0176861	0.00145726	-0.734505	down	-0.734505
IRF2BP2	0.0176861	0.00145838	0.82576	up	0.82576
XRCC1	0.0176861	0.00145777	1.00877	up	1.00877
ZNF576	0.0176861	0.00145777	1.00877	up	1.00877
MKNK1	0.0176861	0.00145726	-0.734505	down	-0.734505
ZNF397	0.0177394	0.00146392	-0.747593	down	-0.747593
LOC105371059	0.0178372	0.00147546	1.37897	up	1.37897
SNRNP27	0.0178372	0.00147503	-0.678523	mixed	-0.678523
CLUAP1	0.0178372	0.00147546	1.37897	up	1.37897
MXD1	0.0178372	0.00147503	-0.678523	mixed	-0.678523
ZNF174	0.0178372	0.00147546	1.37897	up	1.37897
NAA60	0.0178372	0.00147546	1.37897	up	1.37897
AP1S2	0.0178372	0.00147334	-0.976577	down	-0.976577
ATP5MJ	0.0178981	0.00148165	-0.806977	down	-0.806977
HOTAIR	0.0179598	0.00148909	1.03205	up	1.03205
HOXC11	0.0179598	0.00148909	1.03205	up	1.03205
SMC3	0.01798	0.00149193	-0.838076	down	-0.838076
BRMS1L	0.0180225	0.00149662	-0.753844	down	-0.753844
ATP6V1B1-AS1	0.0180416	0.0015023	-0.771922	down	-0.771922
KDELR2	0.0180416	0.00150405	-0.712599	down	-0.712599
TEX261	0.0180416	0.0015023	-0.771922	down	-0.771922
DAGLB	0.0180416	0.00150405	-0.712599	down	-0.712599
PRMT9	0.0180416	0.00150385	-0.986048	down	-0.986048
SNX9	0.0182261	0.00152179	1.00046	up	1.00046
NUDT15	0.0182261	0.00152086	-0.888552	down	-0.888552
LOC124900419	0.0182769	0.00152721	1.12975	up	1.12975
ZMYM4	0.0182769	0.00152721	1.12975	up	1.12975
ISY1-RAB43	0.0182934	0.00152979	-1.38115	down	-1.38115
RAB43	0.0182934	0.00152979	-1.38115	down	-1.38115
ARMCX5-GPRASP2	0.0184062	0.00154128	0.894976	up	0.894976
RNU6-2	0.0184062	0.00154391	1.28914	up	1.28914
GPRASP2	0.0184062	0.00154128	0.894976	up	0.894976
KRT222	0.0184062	0.00155022	0.904136	up	0.904136
CFAP53	0.0184062	0.00154548	-1.04868	down	-1.04868
FGD1	0.0184062	0.00154924	1.44	up	1.44
CXXC1	0.0184062	0.00154548	-1.04868	down	-1.04868
INPP5B	0.0184062	0.00155114	-0.915149	down	-0.915149
MBD1	0.0184062	0.00154548	-1.04868	down	-1.04868
MTF1	0.0184062	0.00155114	-0.915149	down	-0.915149
GSKIP	0.0184062	0.00154841	0.805824	up	0.805824
ATG2B	0.0184062	0.00154841	0.805824	up	0.805824
ARMCX5	0.0184062	0.00154128	0.894976	up	0.894976
SMARCE1	0.0184062	0.00155022	0.904136	up	0.904136
GPRASP3	0.0184062	0.00154128	0.894976	up	0.894976
GTF2IRD1	0.0184062	0.00155005	1.33121	up	1.33121
GPRASP1	0.0184062	0.00154128	0.894976	up	0.894976
AFF1-AS1	0.0184216	0.00155363	-1.11575	down	-1.11575
C4orf36	0.0184216	0.00155363	-1.11575	down	-1.11575
C8orf44-SGK3	0.0184745	0.00156048	-0.894222	down	-0.894222
C8orf44	0.0184745	0.00156048	-0.894222	down	-0.894222
VCPIP1	0.0184745	0.00156048	-0.894222	down	-0.894222
SLC25A41	0.0185134	0.00156497	1.37442	up	1.37442
SLC25A23	0.0185134	0.00156497	1.37442	up	1.37442
DENND1C	0.0185134	0.00156497	1.37442	up	1.37442
ABCA2	0.0185346	0.00156917	-1.11485	down	-1.11485
FUT7	0.0185346	0.00156917	-1.11485	down	-1.11485
LINC02908	0.0185346	0.00156917	-1.11485	down	-1.11485
MIR6790	0.0186048	0.00157631	1.19508	up	1.19508
GTF2F1	0.0186048	0.00157631	1.19508	up	1.19508
ISG15	0.0186694	0.00158299	1.44897	up	1.44897
GNPDA1	0.0187462	0.00159072	-1.32336	down	-1.32336
EMD	0.0188043	0.00159687	-1.08059	down	-1.08059
MIR3137	0.0188741	0.00160695	-1.13633	down	-1.13633
RNVU1-30	0.0188741	0.00160769	0.871185	up	0.871185
XXYLT1	0.0188741	0.00160695	-1.13633	down	-1.13633
LINC00869	0.0188741	0.00160769	0.871185	up	0.871185
LOC644634	0.0188741	0.00160769	0.871185	up	0.871185
MIR194-2HG	0.0188856	0.00160989	1.63608	up	1.63608
EHD1	0.0188856	0.00160989	1.63608	up	1.63608
MIR192	0.0188856	0.00160989	1.63608	up	1.63608
MIR194-2	0.0188856	0.00160989	1.63608	up	1.63608
SDK1	0.0190099	0.00162342	-1.36177	down	-1.36177
OPA1	0.0190099	0.00162541	-1.39706	down	-1.39706
SRI	0.0190099	0.00162537	-1.00466	down	-1.00466
ATP13A4	0.0190099	0.00162541	-1.39706	down	-1.39706
MIR6822	0.0190471	0.00163229	-1.07477	down	-1.07477
TTC21A	0.0190471	0.00163229	-1.07477	down	-1.07477
CEP131	0.0190471	0.00163022	1.34414	up	1.34414
GORASP1	0.0190471	0.00163229	-1.07477	down	-1.07477
STAT4-AS1	0.0190567	0.00163434	-1.28731	down	-1.28731
HLTF-AS1	0.0191337	0.00164343	-0.639132	down	-0.639132
HLTF	0.0191337	0.00164343	-0.639132	down	-0.639132
VPS8	0.0191745	0.00164817	-0.574084	down	-0.574084
A2M-AS1	0.0192661	0.00165855	1.05286	up	1.05286
A2M	0.0192661	0.00165855	1.05286	up	1.05286
LINC00612	0.0192661	0.00165855	1.05286	up	1.05286
GJA9-MYCBP	0.0192733	0.00166476	-0.896411	down	-0.896411
LOC124904403	0.0192733	0.00166647	0.795368	up	0.795368
LOC124904404	0.0192733	0.00166647	0.795368	up	0.795368
GAP43	0.0192733	0.00166791	-0.875567	down	-0.875567
MYCBP	0.0192733	0.00166476	-0.896411	down	-0.896411
LINC02806	0.0192733	0.00166647	0.795368	up	0.795368
RRAGC	0.0192733	0.00166476	-0.896411	down	-0.896411
EVI5	0.0192733	0.00166782	-1.28564	down	-1.28564
GJA9	0.0192733	0.00166476	-0.896411	down	-0.896411
ACTL6A	0.0192733	0.00166045	-0.539047	down	-0.539047
STX3	0.0193672	0.00167729	1.39235	up	1.39235
OR10V2P	0.0193672	0.00167729	1.39235	up	1.39235
FAM199X	0.0193877	0.00168032	-0.985556	down	-0.985556
MIR1913	0.0194443	0.00168649	-0.850495	down	-0.850495
RPS6KA2-IT1	0.0194443	0.00168649	-0.850495	down	-0.850495
RAMACL	0.0194443	0.00168649	-0.850495	down	-0.850495
RPS6KA2	0.0194443	0.00168649	-0.850495	down	-0.850495
RNASET2	0.0194443	0.00168649	-0.850495	down	-0.850495
CARS2	0.0194564	0.00169005	-0.807657	down	-0.807657
TAF1B	0.0194564	0.00168943	-0.760747	down	-0.760747
ATP11A	0.0194651	0.00169207	-0.740688	down	-0.740688
VTI1B	0.0194731	0.0016943	0.663533	mixed	0.663533
RDH11	0.0194731	0.0016943	0.663533	mixed	0.663533
KLF9	0.0194731	0.00169529	-1.37721	down	-1.37721
GINS3	0.0195387	0.00170226	-0.819706	down	-0.819706
ARRB2	0.0195652	0.00170584	-0.715828	down	-0.715828
CRTC3-AS1	0.0195657	0.00170715	-0.932216	down	-0.932216
TMEM30B	0.019713	0.00172128	-0.822917	down	-0.822917
PEBP1	0.0197359	0.00172456	-0.714964	down	-0.714964
ETV6	0.0197566	0.00172867	-1.16717	down	-1.16717
SH3BP5L	0.0197566	0.00172893	-0.96696	down	-0.96696
ZFC3H1	0.01976	0.00173622	-1.03826	down	-1.03826
ATP13A3-DT	0.01976	0.00173676	-1.37448	down	-1.37448
NDUFC1	0.01976	0.00173405	-1.05661	down	-1.05661
TMEM19	0.01976	0.00173622	-1.03826	down	-1.03826
ATP13A3	0.01976	0.00173676	-1.37448	down	-1.37448
[truncated: 20,006 more rows]
