# Supplementary material for: Pharmacological Activation of SIRT6 Suppresses Progression of Head and Neck and Esophagus Squamous Cell Carcinoma by Modulation of Cellular Metabolism and Protein Translation
Source: Research Square preprint supplement (doi:10.21203/rs.3.rs-5797433/v1), 2025-01-30
Supplement: Supplementary file 2 [file e155ae31be3f1e8510bad599.xlsx]

## Sheet: Combined
	SNU	SNU	SNU	SNU	SNU	SNU	SNU	SNU	KYSE	KYSE	KYSE	KYSE	KYSE	KYSE	KYSE	KYSE
pathway	pval	padj	log2err	ES	NES	size	leadingEdge	gene_set	pval	padj	log2err	ES	NES	size	leadingEdge	gene_set
GOBP_NEGATIVE_REGULATION_OF_RNA_BIOSYNTHETIC_PROCESS	6.27438e-15	4.78485e-11	0.996986	0.293229	1.88824	1002	TBL1XR1,ZNF75A,TLE6,BCOR,MEN1,ZNF140,HEXIM1,ZMYM2,NRIP1,BAZ2A,MECOM,MAZ,ZC3H4,HAMP,CIPC,HSF4,CHD3,PARP10,MTA3,CTBP1,ID2,KDM5A,SMAD7,TFAP4,EFNA1,FOSB,PPP1R13L,CHD4,CIR1,SORBS3,PHF12,SRSF2,BMP4,MTERF3,CAPN3,CDKN1B,HOXB8,DKK1,NR4A2,EGR1,TASOR,TFAP2A,CUX1,SKOR1,NR1D1,HMGA2,NOP53,CHD8,BCL6,ZMYM5,SKIL,HOXA7,SET,HNRNPK,POU6F1,PML,SMAD3,KDM2A,CSF2,RECQL5,LMO4,SOX12,FOXK2,PAX9,PA2G4,HOXA2,DDX5,GZF1,IRF2BP…	c5_GO.Biological.Process	1.35152e-10	3.43782e-07	0.826657	0.23474	1.79625	1018	THAP11,ZMYM2,CCND1,FOXD3,SIX5,NR3C1,RELB,ZBTB7A,NR2C2,IRF3,TMBIM6,RUVBL2,ZBTB10,PHF12,ZMYND15,PRMT5,OVOL1,ERF,DEDD2,MTA2,CHD3,UHRF1,NR6A1,NOTCH3,ZNF174,ELK4,CBY1,SHC1,SMAD7,ZFP36,MAFG,SIRT7,GTF2IRD1,ZBTB7B,HCLS1,TLE5,CEBPB,CHD4,BRCA1,CIITA,ZNF140,ZNF566,TFAP2A,HOXB8,PAX2,SAMD11,NR2F6,PPARA,TRIB3,LGR4,NFATC3,KAT14,ZNF555,GAS6,ZNF827,PRDM12,ARID5B,HEXIM1,LDB1,ATN1,CTBP1,ZNF296,MACROH2A1,FOXC2,LOXL3…	c5_GO.Biological.Process
HOXL.subclass.homeoboxes	4.04861e-14	4.36845e-11	0.965328	0.778334	3.0748	36	EVX1,HOXA1,HOXB6,HOXB7,HOXB8,HOXB9,HOXA9,HOXA10,HOXA11,HOXA3,HOXA7,HOXA4,HOXA5,HOXA6,HOXC13,HOXA2,HOXB5,HOXC6,HOXC9,HOXC4,HOXC8,HOXC10,HOXC11,HOXB4,GSX2	HUGO.Genes.groups	3.51171e-11	3.77509e-08	0.851339	0.675173	3.00089	39	HOXB6,HOXB7,HOXB8,HOXB9,HOXA3,HOXA5,HOXA6,HOXA4,HOXA7,HOXC13,HOXD3,HOXC11,HOXA1,HOXC6,HOXC9,HOXC4,HOXC8,HOXC10,HOXC12,HOXA9,HOXA10,HOXA11,CDX2,HOXD10,HOXD11,HOXD12,HOXB4,HOXB5,HOXB2	HUGO.Genes.groups
GOBP_POSITIVE_REGULATION_OF_DEVELOPMENTAL_PROCESS	6.79309e-14	2.59021e-10	0.954542	0.295296	1.89453	939	CYP27B1,BAD,AXL,PHLDB1,TLE6,ADIRF,MMRN2,METRN,ADM,CAPN2,SMARCD2,RIN2,EHD1,ADM2,PIK3CD,TNFRSF1A,PLXNB2,LYN,SRRT,NFE2L2,ID2,SMAD7,SP1,CUL7,GLI1,PPP1R13L,MIR200C,BMP4,PRKCH,WNT5B,CAPN3,BTG1,HOXB7,AP3D1,DKK1,HAPLN4,ACTB,IGF1R,CLSTN1,BCL9L,TFAP2A,CUX1,HMGA2,CYP1B1,EHD2,HOXA11,BCL6,JAG1,ISLR2,SKIL,CLCF1,BICRAL,ZNF16,DDAH1,NF2,MIR125A,MIR99B,SMAD3,HOXA5,CSF2,BTC,STK24,SOX12,ERBB3,PA2G4,BMPR1B,ETV4,EFEMP…	c5_GO.Biological.Process	1.92103e-05	0.00610809	0.57561	0.200012	1.51688	952	DVL2,AXL,CCND1,NR2C2,PRMT1,EHD1,CAPRIN1,MAPKAPK5,TNFSF13,CUL7,ETV4,PRMT5,PAFAH1B1,ACIN1,MIR200C,ADM2,ISG15,INHBA,METRN,SPRY1,BAD,GPC1,TBC1D24,SMAD7,ZFP36,ADNP,ZBTB7B,HCLS1,CEBPB,MRTFB,BMPR1B,RPS6KB1,BRCA1,AGRN,ARNT,TFAP2A,HOXB7,PAX2,CPNE9,CLCN2,LAMB2,RBM4,LGR4,GAS6,CREBL2,HAX1,BAX,SOD2,MACROH2A1,FOXC2,RCOR1,ELL3,AKIRIN1,HOXA5,MAG,STAT6,KAT2A,TGFB1,F11R,ACVR2B,TNFSF9,JUND,NOTCH1,ZNF385A,PRKD2,CD4,…	c5_GO.Biological.Process
GOBP_POSITIVE_REGULATION_OF_RNA_METABOLIC_PROCESS	1.69776e-13	4.31572e-10	0.943632	0.26618	1.7426	1425	TBL1XR1,MLLT10,ADIRF,MEN1,NRIP1,NCOA6,SMARCD2,NKX2-8,FOSL2,SLC38A2,MIR192,EVX1,EGFR,HOXA1,MECOM,MAZ,TNFRSF1A,HAMP,USF2,CHD3,FSTL3,MTA3,RHOQ,GTF2A1,CTBP1,NFE2L2,MED31,ID2,KDM5A,SP1,GLI1,ZFP36L2,TFAP4,FOSB,ERCC1,CHD4,ANXA2,METTL23,CARF,BMP4,CAND1,PWWP2B,CAPN3,SSBP2,HOXB7,HOXB9,AP3D1,TFCP2,ACTB,NR4A2,IL11,ZNF395,EGR1,TEAD3,BAZ1B,ZNF462,CIRBP,BCL9L,TFAP2A,CCDC124,NR1D1,ZNF585A,ZNF585B,HMGA2,ELL,SUPT1…	c5_GO.Biological.Process	1.34039e-11	5.11427e-08	0.875325	0.222047	1.74241	1445	MAP2K7,DVL2,PSMC3,THAP11,ZNF606,FOXD3,KDM6B,SIX5,NR3C1,RELB,NR2C2,IRF3,BCL2L12,RUVBL2,MIR192,CAPRIN1,NFAT5,PKN1,ATXN7L3,ETV4,TNRC6B,PRMT5,RBM23,GMEB2,GSK3A,MTA2,CHD3,USP21,KARS1,INHBA,UHRF1,NR6A1,UBE2L3,MKRN2,CREBRF,KMT2D,MOV10,TBK1,NOTCH3,ELK4,TRIM8,MIR149,SHC1,FHOD1,ZFP36,DDX3X,MAFG,SIRT7,ZBTB7B,HCLS1,DAZAP1,SAMD4A,CEBPB,MRTFB,BMPR1B,RNF4,CHD4,PSMC3IP,MED26,CAMTA2,BRCA1,MIR195,MIR497,CIITA,AGRN…	c5_GO.Biological.Process
GOBP_NEGATIVE_REGULATION_OF_NUCLEOBASE_CONTAINING_COMPOUND_METABOLIC_PROCESS	4.9075e-13	9.35614e-10	0.921426	0.27018	1.75802	1194	TBL1XR1,METTL1,ZNF75A,TLE6,BCOR,MEN1,ZNF140,HEXIM1,ZMYM2,NRIP1,BAZ2A,MECOM,H1-10,MAZ,ZC3H4,HAMP,CIPC,HSF4,CHD3,PARP10,MTA3,CTBP1,ID2,KDM5A,SMAD7,TFAP4,EFNA1,FOSB,PPP1R13L,ERCC1,CHD4,CIR1,SORBS3,PHF12,SRSF2,BMP4,MTERF3,CAPN3,CDKN1B,HOXB8,SMCHD1,DKK1,NR4A2,EGR1,TASOR,CIRBP,TFAP2A,CUX1,SKOR1,NR1D1,HMGA2,NOP53,CHD8,BCL6,ZMYM5,SKIL,HOXA7,SET,HNRNPK,POU6F1,PML,SMAD3,PKP1,KDM2A,CSF2,RECQL5,LMO4,SOX12,FO…	c5_GO.Biological.Process	5.44235e-10	1.03826e-06	0.801216	0.221043	1.71637	1204	THAP11,ZMYM2,CCND1,FOXD3,SIX5,NR3C1,RELB,ZBTB7A,NR2C2,IRF3,TMBIM6,RUVBL2,ZBTB10,ERCC4,SENP3,PHF12,ZMYND15,PRMT5,H1-10,OVOL1,ERF,GSK3A,DEDD2,MTA2,CHD3,TERF2IP,UHRF1,NR6A1,TEN1,CTC1,NOTCH3,ZNF174,ELK4,CBY1,SHC1,SMAD7,ZFP36,MAFG,SIRT7,GTF2IRD1,ZBTB7B,HCLS1,TLE5,CEBPB,PTBP2,CHD4,BRCA1,CIITA,ZNF140,ZNF566,TFAP2A,HOXB8,PAX2,SAMD11,CSDE1,OGG1,NR2F6,PPARA,U2AF2,CIRBP,TRIB3,LGR4,NFATC3,KAT14,ZNF555,GAS6,Z…	c5_GO.Biological.Process
GOBP_POSITIVE_REGULATION_OF_TRANSCRIPTION_BY_RNA_POLYMERASE_II	2.88678e-12	4.40291e-09	0.898671	0.284632	1.82214	915	TBL1XR1,MLLT10,ADIRF,MEN1,NRIP1,NCOA6,NKX2-8,FOSL2,EVX1,EGFR,HOXA1,MECOM,TNFRSF1A,HAMP,USF2,FSTL3,RHOQ,GTF2A1,NFE2L2,MED31,SP1,GLI1,TFAP4,FOSB,ERCC1,ANXA2,METTL23,CARF,BMP4,CAND1,PWWP2B,SSBP2,HOXB7,HOXB9,AP3D1,TFCP2,NR4A2,IL11,ZNF395,EGR1,TEAD3,BAZ1B,ZNF462,BCL9L,TFAP2A,NR1D1,ZNF585A,ZNF585B,HMGA2,ELL,CHD8,HOXA9,HOXA10,MET,JAG1,MED13,HOXA7,ZNF507,HNRNPK,PRPF6,SMAD3,HOXA4,HOXA5,LMO4,HOXC13,SOX12,F…	c5_GO.Biological.Process	2.08632e-08	3.18414e-05	0.733762	0.225241	1.70768	939	DVL2,PSMC3,THAP11,ZNF606,FOXD3,KDM6B,SIX5,NR3C1,RELB,NR2C2,IRF3,BCL2L12,RUVBL2,NFAT5,ETV4,GMEB2,GSK3A,MTA2,INHBA,UHRF1,NR6A1,MKRN2,CREBRF,KMT2D,TBK1,NOTCH3,ELK4,FHOD1,DDX3X,MAFG,ZBTB7B,HCLS1,CEBPB,MRTFB,BMPR1B,RNF4,MED26,CAMTA2,BRCA1,CIITA,AGRN,ARNT,PTOV1,TFAP2A,HOXB7,HOXB9,PAX2,PPARA,GTF2F1,ZNF580,RBM14,NFATC3,ZNF827,IL11,HAX1,TET3,LDB1,FOXC2,GMEB1,ELL3,AKIRIN1,HOXA5,HOXA4,HOXA7,CEBPG,STAT6,KAT2…	c5_GO.Biological.Process
GOBP_NEGATIVE_REGULATION_OF_TRANSCRIPTION_BY_RNA_POLYMERASE_II	7.89962e-12	1.00404e-08	0.875325	0.299773	1.88522	733	TBL1XR1,ZNF75A,TLE6,BCOR,MEN1,ZNF140,HEXIM1,NRIP1,MAZ,HAMP,HSF4,CHD3,MTA3,CTBP1,ID2,KDM5A,SMAD7,EFNA1,FOSB,PPP1R13L,CHD4,CIR1,SORBS3,PHF12,BMP4,HOXB8,DKK1,NR4A2,EGR1,TFAP2A,CUX1,SKOR1,NR1D1,HMGA2,NOP53,CHD8,BCL6,ZMYM5,SKIL,HOXA7,POU6F1,SMAD3,LMO4,SOX12,FOXK2,HOXA2,DDX5,GZF1,IRF2BP1,ZNF131,ZNF469,IRF2BP2,VDR,USP3,RARA,CITED2,JAZF1,DAB2IP,ZMYND8,BMP6,BHLHE41,ETV5,MACROH2A1,ACVR2B,ZNF133,LRRFIP1,SAT…	c5_GO.Biological.Process	5.89397e-08	7.49615e-05	0.719513	0.233081	1.73205	757	THAP11,CCND1,FOXD3,NR3C1,ZBTB7A,NR2C2,IRF3,TMBIM6,ZBTB10,PHF12,OVOL1,ERF,MTA2,CHD3,UHRF1,NR6A1,NOTCH3,ZNF174,ELK4,SMAD7,ZFP36,MAFG,SIRT7,GTF2IRD1,ZBTB7B,HCLS1,TLE5,CEBPB,CHD4,CIITA,ZNF140,ZNF566,TFAP2A,HOXB8,NR2F6,PPARA,TRIB3,NFATC3,KAT14,ZNF555,PRDM12,ARID5B,HEXIM1,LDB1,ATN1,CTBP1,ZNF296,MACROH2A1,FOXC2,HOXA7,STAT6,KAT2A,ACVR2B,CAV1,JUND,NSD1,MTA3,TBX6,HDAC7,NOTCH1,ZHX2,MXD4,SOX18,ZBTB21,ZNF614,…	c5_GO.Biological.Process
GOBP_REGULATION_OF_CELL_DIFFERENTIATION	8.94807e-11	9.30224e-08	0.839089	0.263853	1.70894	1101	CYP27B1,BAD,GPR137,AXL,PHLDB1,ADIRF,MEN1,METRN,ADM,SMARCD2,RIN2,FOSL2,TSKU,EGFR,TNFRSF1A,PLXNB2,CHD3,LYN,FSTL3,SRRT,MTA3,KEAP1,NFE2L2,ID2,SMAD7,CUL7,GLI1,ZFP36L2,EFNA1,PPP1R13L,CHD4,MIR200C,PTPN6,ANXA2,FLOT2,SEMA4B,BMP4,PRKCH,CAPN3,BTG1,CDKN1B,HOXB8,AP3D1,DKK1,RAC3,HAPLN4,ACTB,NPR2,BCL9L,TFAP2A,CUX1,NR1D1,HOXA9,HOXA11,BCL6,JAG1,ISLR2,SKIL,HOOK3,HOXA7,CLCF1,BICRAL,ZNF16,SEMA3B,NF2,MIR99B,SMAD3,HOX…	c5_GO.Biological.Process	0.000111026	0.0132686	0.538434	0.186022	1.43456	1127	AXL,CCND1,DMPK,PRMT1,CAPRIN1,CUL7,ETV4,PRMT5,PAFAH1B1,ACIN1,GSK3A,MIR200C,PTPN6,MTA2,CHD3,ISG15,INHBA,METRN,SPRY1,NOTCH3,BAD,GPR137,GPC1,MIR149,TBC1D24,SMAD7,ZFP36,MAFG,ADNP,ZBTB7B,HCLS1,CEBPB,BMPR1B,CHD4,TCIRG1,NBR1,ARNT,TFAP2A,HOXB8,PAX2,BRPF1,ESRP1,CLCN2,PPARA,LAMB2,RBM4,TRIB3,NFATC3,GAS6,NPR2,CREBL2,CTNNA1,HAX1,LDB1,SOD2,MACROH2A1,ABCG1,LOXL3,RCOR1,ELL3,AKIRIN1,HOXA5,HOXA7,MAG,KAT2A,ABCA1,TGF…	c5_GO.Biological.Process
GOBP_APOPTOTIC_PROCESS	9.75845e-11	9.30224e-08	0.839089	0.250024	1.63594	1413	BAD,AXL,LTBR,TNFRSF18,DPEP1,PAK6,BUB1B,EDAR,TRAF1,CTSD,ADM,CAPN2,MAPKAP1,PTPA,FOSL2,HTRA4,GABARAP,CLDN7,SIRT5,MYO18A,EGFR,MECOM,PIK3CD,MAZ,TNFRSF1A,NOL3,NAA38,LYN,MAEA,SGPL1,NFE2L2,ANXA4,TFAP4,EFNA1,PPP1R13L,ZNF443,PTPN6,BMP4,PRKCH,CAPN3,BTG1,CDKN1B,KRT18,KRT8,LCN2,DKK1,ACTB,NR4A2,ARG2,UFM1,CDK11B,IL11,EGR1,IGF1R,NPR2,TFAP2A,SYVN1,AKT1S1,NSMF,HMGA2,CYP1B1,NOP53,CHD8,CARD9,BCL6,SKIL,SET,CLCF1,RAD9…	c5_GO.Biological.Process	2.05316e-05	0.00613297	0.57561	0.186043	1.45764	1414	MAP2K7,MCL1,GABARAP,AXL,THAP11,CCND1,DMPK,NR3C1,NAA35,ZBTB7A,IRF3,BCL2L12,SERPINB9,TMBIM6,RUVBL2,MAP3K11,PKN1,ACIN1,ZMAT3,GSK3A,DEDD2,PTPN6,NAA38,INHBA,CFDP1,AKR1A1,NME6,BAD,SHC1,JAG2,ZFP36,CECR2,RFFL,DDX3X,ADNP,HCLS1,TLE5,CLDN7,CARD9,CEBPB,GSN,BMPR1B,TCIRG1,RPS6KB1,INCA1,BRCA1,ALOX12,MIR195,CTSK,FKBP8,TFAP2A,NAIF1,PAX2,OGG1,PPP1R13B,PPARA,SON,TRIB3,PDE6B,GAS6,NPR2,MKNK2,MERTK,CLN3,IL11,CTNNA1,HA…	c5_GO.Biological.Process
GOBP_REGULATION_OF_MULTICELLULAR_ORGANISMAL_DEVELOPMENT	2.98429e-10	2.52869e-07	0.814036	0.265947	1.71252	1007	CYP27B1,BAD,GPR137,AXL,PHLDB1,TLE6,MMRN2,BCOR,METRN,ADM,SMARCD2,SEPTIN7,ADM2,PIK3CD,TNFRSF1A,CEMIP2,PLXNB2,LYN,FSTL3,SRRT,KEAP1,NFE2L2,ID2,SMAD7,SP1,CUL7,GLI1,ZFP36L2,EFNA1,MIR200C,PTPN6,ANXA2,SEMA4B,BMP4,PRKCH,CAPN3,BTG1,CDKN1B,HOXB8,AP3D1,DKK1,HAPLN4,ACTB,PTPN13,CLSTN1,TFAP2A,CUX1,NR1D1,HMGA2,CYP1B1,HOXA9,HOXA11,BCL6,JAG1,ISLR2,SKIL,HOOK3,HOXA7,CLCF1,ZNF16,DDAH1,SEMA3B,NF2,MIR125A,MIR99B,PML,SM…	c5_GO.Biological.Process	0.00259713	0.0976034	0.431708	0.174565	1.33464	1015	AXL,CCND1,NR2C2,PRMT1,RUVBL2,CAPRIN1,CUL7,ETV4,PRMT5,PAFAH1B1,ACIN1,GSK3A,MIR200C,PTPN6,ADM2,ISG15,INHBA,METRN,SPRY1,BAD,GPR137,TBC1D24,SMAD7,ZFP36,MAFG,ADNP,ZBTB7B,HCLS1,CEBPB,BMPR1B,NBR1,BRCA1,TPPP,AGRN,CTSK,ARNT,TFAP2A,HOXB8,PAX2,BRPF1,ESRP1,CLCN2,PPARA,KAT14,ADGRB2,GAS6,CTNNA1,HAX1,LDB1,MACROH2A1,FOXC2,LOXL3,RCOR1,ELL3,INO80B,HOXA5,HOXA7,MAG,KAT2A,TGFB1,F11R,ACVR2B,TNFSF9,CAV1,NOTCH1,L3MBTL1,…	c5_GO.Biological.Process
GOBP_REGULATION_OF_PROGRAMMED_CELL_DEATH	7.98688e-10	6.0908e-07	0.801216	0.256453	1.66198	1109	BAD,AXL,LTBR,TNFRSF18,DPEP1,TRAF1,CTSD,ADM,CAPN2,MAPKAP1,PTPA,HTRA4,CLDN7,SIRT5,MYO18A,EGFR,MECOM,PIK3CD,MAZ,TNFRSF1A,NOL3,NAA38,LYN,MAEA,NFE2L2,ANXA4,TFAP4,EFNA1,PTPN6,BMP4,PRKCH,CAPN3,BTG1,CDKN1B,KRT18,DKK1,ACTB,NR4A2,ARG2,UFM1,IL11,EGR1,IGF1R,TFAP2A,SYVN1,AKT1S1,NSMF,HMGA2,CYP1B1,NOP53,CHD8,CARD9,BCL6,MET,SKIL,SET,CLCF1,RAD9A,HNRNPK,ZNF16,MIRLET7F1,NF2,MIR125A,PML,SMAD3,HOXA5,CSF2,BTC,CFDP1,ER…	c5_GO.Biological.Process	5.37734e-05	0.00873073	0.557332	0.187612	1.44464	1109	MAP2K7,MCL1,AXL,THAP11,CCND1,NR3C1,NAA35,ZBTB7A,IRF3,BCL2L12,SERPINB9,TMBIM6,MARK4,RUVBL2,MAP3K11,DEDD2,PTPN6,NAA38,INHBA,DPP9,CFDP1,AKR1A1,BAD,SHC1,ZFP36,RFFL,DDX3X,SPATA2,ADNP,HCLS1,TLE5,CLDN7,CARD9,CEBPB,GSN,BMPR1B,RPS6KB1,INCA1,BRCA1,ALOX12,MIR195,CTSK,FKBP8,TFAP2A,PAX2,OGG1,PPP1R13B,PPARA,SON,GAS6,MERTK,CLN3,IL11,CTNNA1,HAX1,BAX,SOD2,MAEA,FOXC2,HTRA2,MMP2,HYPK,ELL3,HOXA5,SPHK2,MAG,TGFB1,TNFS…	c5_GO.Biological.Process
EGFR1; datasource: netpath;	2.86524e-09	8.25763e-06	0.774939	0.322094	1.93266	414	BAD,AXL,AHNAK,MAP4K5,EEF1A1,PTPN18,SLC38A2,EGFR,PIK3CD,LSR,LYN,TRIP6,PLEC,ACP1,CTBP1,ANXA4,SP1,TNS3,PTPN6,ANXA2,FLOT2,KRT18,KRT8,ZDHHC5,ACTB,APLP2,MET,CBLC,EPS8,SMAD3,RALB,TNS2,PLEKHA6,ARHGAP32,ERBB3,FRS3,PTK2,SOS2,RPS6KA3,JAK1,STK11,TGIF1,SHB,CEBPB,PRKCD,ESYT1,ABL1,PKM,CAV2,MAPK8,YWHAZ,KRT7,PTTG1IP,RIN1,RELA,NEDD4,MYC,GPRC5A,KRAS,MPRIP,PTPN1,SPRY4,MTA2,PPP1R14B,MAPK9,RPS6KA2,RICTOR,PKN2,ATP1A1,C…	PathwayCommons11	0.0062651	0.538184	0.407018	0.199776	1.38978	420	MAP2K7,AXL,PHPT1,DLG3,PYGB,PPP1R14B,GSK3A,PTPN6,MTA2,SPRY1,ELK4,BAD,SHC1,DDX3X,CEBPB,GSN,RPS10,CDV3,RPS6KB1,ATXN2,MYL12B,CTBP1,CAV1,JUND,YWHAZ,ITGB4,MYC,ACTB,SFPQ,WNK1,HSPE1,EPHA4,IL17RD,CDK2,PFN1,ABL1,CDH3,PIK3R2,DUSP1,KRT18,KRT8,VAV1,LSR,TP53,SPRY3,ARHGAP5,RPS6KA2,EIF4EBP1,SNX5,RAB5A,VASP,TGIF1,EPHB3,DSG2,TRIP6,ARAP1,NEDD9,GRB7,DDX6,RELA,EPN3,FOS,PRKCD,INPPL1,CDC42,STK11,ELMO2,EPN1,NDUFA13,CDH1…	PathwayCommons11
Clustered.protocadherins	4.39795e-09	2.3727e-06	0.761461	0.771994	2.69651	23	PCDHGA12,PCDHGC3,PCDHGC5,PCDHGC4,PCDHGB7,PCDHGB6,PCDHGB5,PCDHGB3,PCDHGB2,PCDHGB1,PCDHGA11,PCDHGA10,PCDHGA9,PCDHGA7,PCDHGA6,PCDHGA5,PCDHGA4,PCDHGA3,PCDHGA2,PCDHGA1,PCDHGB8P,PCDHGB4,PCDHGA8	HUGO.Genes.groups	5.4955e-06	0.00196922	0.610527	-0.628588	-2.45534	23	PCDHGA8,PCDHGB4,PCDHGB8P,PCDHGA1,PCDHGA2,PCDHGA3,PCDHGA4,PCDHGA5,PCDHGA6,PCDHGA7,PCDHGA9,PCDHGA10,PCDHGA11,PCDHGB1,PCDHGB2,PCDHGB3,PCDHGB5,PCDHGB6,PCDHGB7,PCDHGC4,PCDHGC5,PCDHGC3,PCDHGA12	HUGO.Genes.groups
GOBP_CELL_ADHESION	1.00816e-08	6.29701e-06	0.74774	0.260348	1.6651	905	BAD,AXL,TNFRSF18,MMRN2,TLN2,FBLN5,MBP,SMARCD2,RIN2,PLEKHA2,CLDN7,MIR192,ATP5F1B,EGFR,ARVCF,PLXNB2,LYN,FSTL3,TRIP6,MXRA8,MAEA,SPON2,SMAD7,PTK7,EFNA1,MIR141,PTPN6,SORBS3,ANXA2,FLOT2,BMP4,KRT18,AP3D1,RAC3,HAPLN4,ACTB,ARG2,CLSTN1,CYP1B1,BCL6,NT5E,JAG1,HOXA7,RAB1A,FUT4,HAS2,NF2,MIRLET7E,MIR125A,PML,SMAD3,PKP1,FUT7,HSPG2,TAOK2,CDH16,CFDP1,SOX12,ERBB3,ITGB6,RPSA,EFEMP2,TGFB1I1,CDHR2,TGFB1,F11R,PTK2,TESK…	c5_GO.Biological.Process	0.00113695	0.061972	0.45506	0.179316	1.35927	931	AXL,DLG3,MIR192,SIPA1,NFAT5,PTK7,CDH24,MIR141,PTPN6,CFDP1,IGFALS,STX3,BAD,SHC1,JAG2,SMAD7,ACHE,ZBTB7B,CLDN7,CEBPB,ALOX12,ARL2,PPARA,LAMB2,RADIL,GAS6,MERTK,FUT7,CTNNA1,NECTIN2,LDB1,MAEA,SPON2,FOXC2,SNED1,LOXL3,MMP2,FLRT1,HOXA7,MAG,TGFB1,F11R,GP1BB,TNFSF9,CAV1,TNFRSF13C,MARCHF7,NOTCH1,ITGB2,CDC42EP1,FARP2,MCAM,ITGA10,PRKD2,ICAM3,CD4,ATP2A2,ITGB4,DHPS,ITGAE,ACTB,WNT7B,LIF,PIP5K1C,ARVCF,PRKCE,HOXD3,K…	c5_GO.Biological.Process
GOBP_RESPONSE_TO_OXYGEN_CONTAINING_COMPOUND	1.07249e-08	6.29701e-06	0.74774	0.245063	1.59404	1201	CYP27B1,RDH11,BAD,KCNK4,AXL,SYT7,SCNN1A,DPEP1,FBLN5,CTSD,UBR2,ZNF106,ADM,CAPN2,NRIP1,FOSL2,ERCC6L2,CLDN7,SLC38A2,EGFR,THBD,H6PD,CACTIN,LYN,PLEC,RHOQ,SPON2,NFE2L2,SP1,PTK7,TFAP4,FOSB,ERCC1,TNNT2,MIR200C,CARF,WNT5B,CAPN3,CDKN1B,KRT8,SESN1,DKK1,ACTB,NR4A2,INAVA,EGR1,IGF1R,NPR2,SH2B2,NSMF,NR1D1,CPT1A,CYP1B1,SCARB1,CARD9,HOXA9,HOXA10,HOXA11,NT5E,MET,JAG1,ANXA11,RMI1,ZNF16,MIRLET7F1,EPS8,D2HGDH,ABCA2,F…	c5_GO.Biological.Process	0.0128395	0.214865	0.38073	0.159586	1.24037	1233	RBX1,MAP2K7,AXL,KDM6B,NR3C1,IRF3,TMBIM6,RUVBL2,PALM,SIPA1,CD68,PTK7,PRMT5,OVCA2,GSK3A,MIR200C,SLC2A1,INHBA,SLC29A1,AKR1A1,GYS2,SLC25A23,BAD,KCNK4,SHC1,TRIM41,ADCY3,ZFP36,ADNP,ACHE,ZBTB7B,CLDN7,CARD9,CEBPB,NDUFS4,RPS6KB1,BRCA1,MIR195,AGRN,CTSK,PAX2,CPNE9,OGG1,PPARA,ZNF580,RBM4,TRIB3,GAS6,NPR2,MIR455,ANO1,SIGIRR,FUT7,CTNNA1,AGTRAP,SOD2,SPON2,FOXC2,NAGLU,HTRA2,MMP2,HTR1D,MCOLN1,SPHK2,LRP1,STAT6,PEX1…	c5_GO.Biological.Process
GOBP_HEMOPOIESIS	1.07345e-08	6.29701e-06	0.74774	0.281913	1.76147	655	BAD,GPR137,AXL,LTBR,MEN1,NCOA6,SMARCD2,FOSL2,MECOM,PIK3CD,SLC1A5,LYN,FSTL3,MAEA,SGPL1,NFE2L2,ID2,SMAD7,ZFP36L2,ERCC1,PTPN6,ANXA2,BMP4,HOXB7,HOXB8,AP3D1,ACTB,IL11,EGR1,SYVN1,HOXA9,BCL6,JAG1,HOXA7,CLCF1,ZNF16,PML,FUT7,HOXA5,CSF2,SOX12,ITGB6,TGFB1,TMEM91,IRF2BP2,ISG15,TTC7A,STK4,RARA,SOS2,CITED2,CD164,CYP26B1,JAK1,STK11,NRARP,SH2B3,SHB,CEBPB,RHOH,LRRK1,CIAO3,GABPA,YTHDF2,ABL1,NR3C1,KMT2E,KMT2A,CFLAR…	c5_GO.Biological.Process	0.0003632	0.0286291	0.498493	0.198664	1.46446	671	SLC1A5,AXL,NR3C1,RELB,ZBTB7A,PRMT1,PAFAH1B1,ACIN1,PTPN6,ISG15,INHBA,CTC1,BAD,GPR137,JAG2,SMAD7,ZFP36,ZBTB7B,HCLS1,FASN,CEBPB,TCIRG1,CTSK,ARNT,HOXB7,HOXB8,BRPF1,GAS6,SART3,MKNK2,MERTK,FUT7,IL11,HAX1,BAX,LDB1,SOD2,MAEA,NAGLU,LOXL3,RCOR1,HOXA5,HOXA7,CEBPG,STAT6,KAT2A,TGFB1,TMEM91,GP1BB,TNFSF9,C17orf99,NOTCH1,FARP2,ZNF385A,L3MBTL1,CD4,EIF6,ATXN1L,MYC,ACTB,RPTOR,LIF,EPOR,AP3D1,NBEAL2,WDR38,MEN1,ABL1,P…	c5_GO.Biological.Process
Immune	1.08918e-08	1.26345e-06	0.74774	0.265789	1.68371	846	TBL1XR1,BAD,AXL,LTBR,TNFRSF18,CD247,BCOR,SLC16A2,MEN1,MAP4K2,TRAF1,ADM,CAPN2,EGFR,MECOM,THBD,PIK3CD,TNFRSF1A,HAMP,SLC1A5,LYN,FSTL3,KEAP1,NFE2L2,ID2,SP1,EFNA1,CACNB3,SRSF2,BMP4,CDKN1B,LCN2,RAC3,ACTB,ARG2,MAPK10,IL11,EGR1,IGF1R,BCL6,NT5E,MET,JAG1,CBLC,PDGFA,SH2D1A,CLCF1,FUT4,NF2,NDUFA4L2,PML,SMAD3,FUT7,CSF2,RRAD,SETBP1,BMPR1B,ITGB6,ETV4,CXCR5,WNT10A,TGFB1,ISG15,SOS2,SRR,CD164,CACNA1D,BMP6,JAK1,PSMB…	NanoString_Genes	0.000174495	0.0101207	0.518848	0.195653	1.46798	842	PLA2G4C,RBX1,SLC1A5,MCL1,AXL,CCND1,NR3C1,RELB,IRF3,TNFSF13,CD68,ETV4,CXCL16,SLC2A1,ISG15,INHBA,GNG7,KMT2D,TBK1,NOTCH3,LDHB,GNG12,BAD,TPI1,SHC1,JAG2,LAT,CEBPB,BMPR1B,NDUFA7,NDUFS8,RPS6KB1,BRCA1,ARNT,NRAS,ATP5ME,NFATC3,SIGIRR,FUT7,ASPG,IL11,NECTIN2,SOD2,PRKAR1B,LRP1,STAT6,TGFB1,TNFSF9,TNFRSF13C,NSD1,ACSF3,NOTCH1,ITGB2,PDGFC,CACNA1D,SGK2,ICAM3,CD4,PTCH1,ATP2A2,CPSF7,PSMB10,ITGB4,CREB5,MYC,ACTB,RPTOR…	NanoString_Genes
GOBP_CIRCULATORY_SYSTEM_DEVELOPMENT	2.70165e-08	1.47162e-05	0.733762	0.261364	1.66392	843	TMEM231,MMRN2,PLCD3,BCOR,HEXIM1,ADM,NCOA6,IFT122,RIN2,ATP5F1B,EGFR,HOXA1,ADM2,PIK3CD,TNFRSF1A,CEMIP2,PLEC,SGPL1,NFE2L2,ID2,SMAD7,SP1,CUL7,PTK7,GLI1,EFNA1,PPP1R13L,TNNT2,MIR200C,PDLIM2,ANXA2,BMP4,BTG1,CDKN1B,MIR196A1,DKK1,TNFAIP2,EGR1,MYLK,IGF1R,NPR2,HMGA2,CYP1B1,ECE1,JAG1,PDGFA,HOXA3,HOXA7,POU6F1,DDAH1,HAS2,MIRLET7F1,MIR125A,MIR99B,PML,SMAD3,HSPG2,HOXA5,LMO4,CRIP1,ERBB3,EFEMP2,PRICKLE4,ZFAND5,NOX…	c5_GO.Biological.Process	0.02727	0.295228	0.352488	0.160587	1.21062	866	DVL2,KDM6B,PRMT1,FMNL3,GYS1,CUL7,PTK7,GSK3A,MIR200C,ADM2,INHBA,FKBP10,SPRY1,NOTCH3,CLUAP1,MIR149,CBY1,SHC1,SMAD7,ECE1,BRCA1,MIR195,MIR497,MIR196A1,PPARA,NFATC3,AMOTL2,ADGRB2,NPR2,COL27A1,NEK8,HEXIM1,BAX,SOD2,FOXC2,NAGLU,MMP2,HOXA3,HOXA5,HOXA7,SPHK2,LRP1,KAT2A,TGFB1,ELN,ACVR2B,CAV1,TBX6,HDAC7,NOTCH1,ODAD4,RAMP1,SOX18,MCAM,B9D1,PRKD2,PTCH1,PDE2A,WNT7B,FZD1,LIF,MIR15A,MIR16-1,MIR10B,WNK1,EPOR,ANG,PO…	c5_GO.Biological.Process
GOBP_TUBE_MORPHOGENESIS	2.91384e-08	1.4814e-05	0.733762	0.274266	1.71454	657	MMRN2,PLCD3,EDAR,ADM,IFT122,RIN2,ATP5F1B,EGFR,HOXA1,ADM2,PIK3CD,CEMIP2,PLXNB2,SGPL1,NFE2L2,ID2,SMAD7,SP1,CUL7,PTK7,GLI1,EFNA1,MIR200C,ANXA2,BMP4,BTG1,HOXB7,MIR196A1,TNFAIP2,MYLK,NPR2,HMGA2,CYP1B1,HOXA11,MET,JAG1,PDGFA,HOXA3,HOXA7,DDAH1,HAS2,MIRLET7F1,MIR125A,MIR99B,PML,SMAD3,HSPG2,HOXA5,LMO4,EFEMP2,GZF1,NOX5,TGFB1,PTK2,MKKS,MCAM,VDR,STK4,GTF2I,RARA,CITED2,TSPAN18,MIR15A,MIR16-1,RNF213,DAB2IP,COL1…	c5_GO.Biological.Process	0.00248637	0.0945544	0.431708	0.188976	1.39423	673	DVL2,NR3C1,FMNL3,CUL7,PTK7,MIR200C,ADM2,FKBP10,SPRY1,NOTCH3,CLUAP1,MIR149,SHC1,SMAD7,CECR2,BRCA1,MIR497,HOXB7,MIR196A1,PAX2,PERCC1,LGR4,AMOTL2,ADGRB2,NPR2,COL27A1,BAX,FOXC2,NAGLU,MMP2,HOXA3,HOXA5,HOXA7,LRP1,KAT2A,TGFB1,ACVR2B,CAV1,TBX6,HDAC7,NOTCH1,RAMP1,SOX18,MCAM,PRKD2,PTCH1,MYC,WNT7B,FZD1,MIR15A,MIR16-1,MIR10B,PLXNB2,WNK1,ANG,LZTS2,EPHA4,BSG,TMEM59L,VEGFB,PFN1,ABL1,MKS1,PRCP,HOXA1,CITED1,RARG,…	c5_GO.Biological.Process
GOBP_POSITIVE_REGULATION_OF_SIGNALING	3.8588e-08	1.8392e-05	0.719513	0.240822	1.56682	1215	TBL1XR1,CYP27B1,BAD,GPR137,AXL,LTBR,EDAR,MEN1,MAP4K2,HEXIM1,CTSD,TMEM9,CTDNEP1,EGFR,PIK3CD,MAZ,TNFRSF1A,AMER1,ACSL4,LYN,TRIP6,SECTM1,PTK7,GLI1,EFNA1,PTPN6,SORBS3,ANXA2,BMP4,PRKCH,WNT5B,ZDHHC5,DKK1,INAVA,IL11,IGF1R,CLSTN1,CYP1B1,CARD9,ECE1,JAG1,PDGFA,SKIL,RAD9A,PML,SMAD3,RALB,TAOK2,TEDC1,ERBB3,BMPR1B,FKBP8,FRMD6,TGFB1I1,DDX5,CAPRIN2,GRIN2D,SPIN1,RAB34,TGFB1,RTN4R,NOS1AP,F11R,PTK2,CYP46A1,LAMC1,MBD…	c5_GO.Biological.Process	2.28404e-05	0.00613297	0.57561	0.188143	1.46171	1241	RBX1,MAP2K7,MCL1,DVL2,AXL,ALOX12B,PRMT1,IRF3,MARK4,MAP3K11,NFAT5,PTK7,PRMT5,PAFAH1B1,GSK3A,DEDD2,PTPN6,TERF2IP,INHBA,KMT2D,STX3,TBK1,TRIM8,BAD,GPR137,SHC1,ATP6V0C,TBC1D24,JAG2,TRIM41,DDX3X,ADNP,ZBTB7B,HCLS1,ECE1,CTDNEP1,CARD9,RPS15,BMPR1B,EIF2A,CHERP,RPS6KB1,INCA1,TMEM106A,CLEC16A,CTSK,ARNT,FKBP8,LAMB2,LGR4,GAS6,ANO1,MIB2,RAB34,IL11,CTNNA1,HAX1,NECTIN2,HEXIM1,BAX,WASF1,HTRA2,LOXL3,PRKAR1B,TMEM9,S…	c5_GO.Biological.Process
Stroma	4.55114e-08	2.63966e-06	0.719513	0.271288	1.69682	682	TBL1XR1,BAD,AXL,LTBR,MMRN2,BCOR,SLC16A2,MEN1,MAP4K2,ADM,CAPN2,EGFR,MECOM,PIK3CD,TNFRSF1A,HAMP,SLC1A5,LYN,FSTL3,KEAP1,NFE2L2,ID2,SP1,GLI1,EFNA1,CACNB3,SRSF2,BMP4,CDKN1B,LCN2,RAC3,ACTB,ARG2,MAPK10,EGR1,IGF1R,HMGA2,NT5E,MET,CBLC,PDGFA,FUT4,NDUFA4L2,PML,SMAD3,FUT7,CSF2,RRAD,SETBP1,BMPR1B,ITGB6,ETV4,CXCR5,WNT10A,TGFB1,MCAM,SOS2,SRR,CD164,CACNA1D,BMP6,JAK1,PSMB7,STK11,FGF5,FZD2,XPA,SDHA,ATOX1,BRCA1,C5A…	NanoString_Genes	5.90681e-05	0.0068519	0.557332	0.20653	1.52782	692	PLA2G4C,RBX1,SLC1A5,MCL1,AXL,CCND1,NR3C1,RELB,CD68,ETV4,CXCL16,SLC2A1,INHBA,GNG7,KMT2D,LDHB,GNG12,BAD,TPI1,SHC1,BMPR1B,NDUFA7,NDUFS8,RPS6KB1,BRCA1,ARNT,NRAS,ATP5ME,NFATC3,FUT7,ASPG,NECTIN2,SOD2,PRKAR1B,LRP1,STAT6,TGFB1,NSD1,ACSF3,NOTCH1,PDGFC,CACNA1D,MCAM,SGK2,CD4,PTCH1,ATP2A2,CPSF7,PSMB10,ITGB4,ITGAE,CREB5,MYC,ACTB,RPTOR,WNT7B,FZD1,PRKCE,GADL1,RASGRP2,EPOR,A2M,NOS2,CDK2,MEN1,MAP4K2,VEGFB,ABL1,CD…	NanoString_Genes
GOBP_EPITHELIAL_CELL_PROLIFERATION	6.83258e-08	3.06502e-05	0.704976	0.324021	1.8926	335	BAD,MMRN2,NKX2-8,EGFR,PIK3CD,MTA3,ID2,SP1,GLI1,MIR200C,BMP4,CDKN1B,NR1D1,SCARB1,KLK8,JAG1,POLD4,HAS2,SMAD3,HSPG2,HOXA5,NOX5,TGFB1,LAMC1,VDR,STK4,MIR15A,MIR16-1,DAB2IP,BMP6,MIR101-1,STK11,NRARP,TP63,PDCD6,CEBPB,C5AR1,MIR29A,MIR29B1,SOX9,CAV2,FMC1,CFLAR,IGFBP4,TBX2,PYGO2,NRAS,STAT6,MIR26A1,MYC,B4GALT1,SERPINB1,SFN,VEGFB,FLCN,OSR2,KDM5B,RICTOR,NFKBIZ,TNFSF12,MCC,NGFR,BAX,BAK1,ZEB1,NME1,BGLAP,ECM1,AI…	c5_GO.Biological.Process	0.0862676	0.468355	0.202072	0.175594	1.20714	339	CCND1,OVOL1,MIR200C,UHRF1,BAD,MIR149,PYGO2,ZFP36,CEBPB,MIR497,ARNT,PAX2,NRAS,ZNF580,LGR4,BAX,HOXA5,STAT6,TGFB1,CAV1,MTA3,NOTCH1,SRSF6,PRKD2,PTCH1,MYC,RPTOR,MIR15A,MIR16-1,MIR10B,ANG,VEGFB,CDH3,SGPP2,ATP5F1A,XBP1,MDK,IRF6,SIX4,SLC39A9,TNFSF12,SOX2,MIR34A,MYDGF,TBX2,FUT1,MIR152,OVOL2,BMP4,RAB33B,MED1,WDR77,LAMC1,PGF,JCAD,DAB2IP,NF1,ZNF703,TBX1,ZEB1,CD109,NCSTN,KRIT1,CDC42,STK11,SMO,FLCN,MIR29A,MIR2…	c5_GO.Biological.Process
GOBP_TUBE_DEVELOPMENT	8.45118e-08	3.58048e-05	0.704976	0.260836	1.65421	815	MMRN2,PLCD3,EDAR,ADM,IFT122,RIN2,NKX2-8,FOSL2,ATP5F1B,EGFR,HOXA1,ADM2,PIK3CD,CEMIP2,PLXNB2,SGPL1,NFE2L2,ID2,SMAD7,SP1,CUL7,PTK7,GLI1,EFNA1,MIR200C,PTPN6,ANXA2,BMP4,BTG1,HOXB7,MIR196A1,TNFAIP2,ARG2,MYLK,NPR2,HMGA2,CYP1B1,CHD8,HOXA11,ECE1,MET,JAG1,PDGFA,HOXA3,HOXA7,DDAH1,HAS2,MIRLET7F1,MIR125A,MIR99B,PML,SMAD3,HSPG2,HOXA5,LMO4,ITGB6,FKBP8,EFEMP2,GZF1,NOX5,TGFB1,PTK2,MKKS,BRIP1,MCAM,VDR,STK4,GTF2I,R…	c5_GO.Biological.Process	0.000196793	0.0195928	0.518848	0.191376	1.43639	833	DVL2,NR3C1,FMNL3,NKIRAS2,CUL7,PTK7,MIR200C,PTPN6,ADM2,FKBP10,SPRY1,NOTCH3,CLUAP1,MIR149,CBY1,SHC1,SMAD7,CECR2,SPATA2,ECE1,BRCA1,MIR497,FKBP8,HOXB7,MIR196A1,PAX2,PERCC1,CLCN2,LGR4,AMOTL2,ADGRB2,NPR2,COL27A1,BAX,ABCA3,FOXC2,NAGLU,LOXL3,MMP2,HOXA3,HOXA5,HOXA7,ZNF358,LRP1,KAT2A,TGFB1,ACVR2B,CAV1,TBX6,HDAC7,NOTCH1,ODAD4,LHX3,PDGFC,RAMP1,SOX18,MCAM,SRSF6,PRKD2,PTCH1,ATXN1L,MYC,ADAMTS2,WNT7B,FZD1,LIF,MI…	c5_GO.Biological.Process
GOBP_MUSCLE_STRUCTURE_DEVELOPMENT	9.00336e-08	3.61367e-05	0.704976	0.291358	1.77719	489	ADM,CAPN2,SMARCD2,EHD1,PLEC,ID2,SMAD7,WFIKKN1,TNNT2,PDLIM2,FLOT2,BMP4,WNT5B,CAPN3,BTG1,KRT8,DKK1,ACTB,UNC45A,EGR1,MYLK,BCL9L,EHD2,JAG1,PRR14,POU6F1,STAC3,SMAD3,ERBB3,EFEMP2,HOXA2,DDX5,PRICKLE4,TGFB1,LAMC1,SPAG9,RARA,CITED2,HDGFL2,CD164,CYP26B1,PIEZO1,BHLHE41,SOX6,TCAP,MKX,FZD2,PRICKLE1,KMT5B,SOX9,CAV2,MRTFA,CACNB4,QKI,CFLAR,TBX2,NRAS,MIR26A1,NFATC2,SLC9A1,ZNF609,CSRP1,YBX3,VPS54,KRAS,DDX17,ARID1B…	c5_GO.Biological.Process	0.0113895	0.204501	0.38073	0.186994	1.34303	498	KDM6B,DMPK,EHD1,WFIKKN1,GSK3A,MYMX,GPC1,CBY1,SMAD7,MRTFB,RPS6KB1,MIR195,NRAS,PPARA,USP19,LAMB2,RBM4,NFATC3,OBSCN,ARID5B,PRR14,SOD2,FOXC2,HSD17B1,NAGLU,AKIRIN1,KAT2A,TGFB1,ELN,CAV1,KRT19,NOTCH1,SVIL,ATP2A2,ACTB,LBX2,FZD1,LIF,ZBED6,BMAL1,RARB,FKBP1A,WNT5B,MKX,MAPK11,MAPK12,HDGFL2,KRT8,XBP1,SIX4,OLFM2,CASP3,AKAP13,PDLIM2,MIR34A,ZFPM1,SFMBT1,TBX2,FZD2,HEG1,XKR8,CFL2,ANKRD23,SEMA4C,BMP4,SMARCE1,MED1,L…	c5_GO.Biological.Process
GOBP_REGULATION_OF_EPITHELIAL_CELL_PROLIFERATION	9.72239e-08	3.70715e-05	0.704976	0.336267	1.93577	282	BAD,MMRN2,NKX2-8,EGFR,PIK3CD,MTA3,SP1,GLI1,MIR200C,BMP4,CDKN1B,NR1D1,JAG1,POLD4,HAS2,SMAD3,HSPG2,HOXA5,TGFB1,LAMC1,VDR,STK4,MIR15A,MIR16-1,DAB2IP,BMP6,MIR101-1,STK11,NRARP,TP63,PDCD6,C5AR1,MIR29A,MIR29B1,SOX9,CAV2,FMC1,CFLAR,PYGO2,NRAS,MIR26A1,MYC,B4GALT1,SFN,VEGFB,FLCN,OSR2,KDM5B,RICTOR,TNFSF12,MCC,NGFR,BAX,ZEB1,NME1,ECM1,AIMP1,PLXNB3,PRKD2,EPB41L4B,CCND1,ZFP36L1,RPTOR,ANG,CDC73,NME2,MIR10A,RUNX…	c5_GO.Biological.Process	0.03023	0.309426	0.352488	0.19873	1.34466	290	CCND1,OVOL1,MIR200C,UHRF1,BAD,MIR149,PYGO2,ZFP36,MIR497,ARNT,PAX2,NRAS,ZNF580,BAX,HOXA5,TGFB1,CAV1,MTA3,NOTCH1,SRSF6,PRKD2,PTCH1,MYC,RPTOR,MIR15A,MIR16-1,MIR10B,ANG,VEGFB,CDH3,SGPP2,ATP5F1A,XBP1,MDK,IRF6,SIX4,SLC39A9,TNFSF12,SOX2,MIR34A,MYDGF,FUT1,MIR152,OVOL2,BMP4,RAB33B,MED1,WDR77,LAMC1,PGF,JCAD,DAB2IP,NF1,ZNF703,TBX1,ZEB1,CD109,KRIT1,CDC42,STK11,SMO,FLCN,MIR29A,MIR29B1,STAT5A,NGFR,MIR193A,DLL4…	c5_GO.Biological.Process
Tumor	9.98278e-08	3.86001e-06	0.704976	0.247188	1.59091	1054	TBL1XR1,BAD,AXL,LTBR,TNFRSF18,MMRN2,BCOR,SLC16A2,MEN1,MAP4K2,TRAF1,ADM,CAPN2,EGFR,MECOM,PIK3CD,TNFRSF1A,HAMP,SLC1A5,AMER1,LYN,FSTL3,KEAP1,NFE2L2,ID2,SP1,GLI1,EFNA1,CACNB3,SRSF2,BMP4,WNT5B,CDKN1B,KRT18,LCN2,DKK1,RAC3,ACTB,ARG2,MAPK10,IL11,EGR1,IGF1R,SH2B2,HMGA2,CARD9,HOXA9,HOXA10,HOXA11,BCL6,NT5E,MET,JAG1,CBLC,PDGFA,STAG2,CLCF1,POLD4,FUT4,NDUFA4L2,PML,SMAD3,FUT7,CSF2,H2AX,RRAD,SETBP1,BMPR1B,ITGB6,…	NanoString_Genes	0.00383621	0.11125	0.431708	0.170486	1.30923	1061	PLA2G4C,RBX1,SLC1A5,MCL1,AXL,CCND1,WEE1,NR3C1,RELB,IRF3,TNFSF13,CD68,ETV4,CXCL16,SLC2A1,ISG15,INHBA,SPRY1,GNG7,KMT2D,TBK1,NOTCH3,LDHB,GNG12,BAD,TPI1,SHC1,JAG2,LAT,CARD9,CEBPB,BMPR1B,NDUFA7,NDUFS8,RPS6KB1,BRCA1,ARNT,NRAS,ATP5ME,NFATC3,COL27A1,MERTK,SIGIRR,FUT7,ASPG,IL11,NECTIN2,BAX,SOD2,PRKAR1B,LRP1,STAT6,TGFB1,TNFSF9,TNFRSF13C,KRT19,NSD1,ACSF3,NOTCH1,ITGB2,PDGFC,CACNA1D,MCAM,SGK2,ICAM3,CD4,PTCH1,…	NanoString_Genes
GOBP_POSITIVE_REGULATION_OF_MULTICELLULAR_ORGANISMAL_PROCESS	1.23033e-07	4.46786e-05	0.690132	0.242161	1.56745	1096	CYP27B1,BAD,AXL,TLE6,MMRN2,METRN,MBP,ADM,SMARCD2,TSKU,ADM2,THBD,PIK3CD,HAMP,PLXNB2,LYN,SRRT,SPON2,NFE2L2,ID2,SMAD7,SP1,CUL7,GLI1,PTPN6,ANXA2,FLOT2,BMP4,PRKCH,CAPN3,BTG1,HOXB7,LCN2,AP3D1,DKK1,STOML2,HAPLN4,ACTB,INAVA,OXT,TRIM65,EGR1,IGF1R,CLSTN1,BCL9L,TFAP2A,CUX1,HMGA2,CYP1B1,RAB2B,CARD9,HOXA11,BCL6,JAG1,ISLR2,SKIL,CLCF1,BICRAL,DDAH1,RAB1A,MIR125A,MIR99B,SMAD3,CSF2,SOX12,ERBB3,BMPR1B,ETV4,NLRP1,TG…	c5_GO.Biological.Process	0.000137685	0.0156817	0.518848	0.183319	1.41083	1105	AXL,CCND1,KDM6B,ALOX12B,NR2C2,IRF3,BLOC1S3,CAPRIN1,TNFSF13,CUL7,ETV4,PRMT5,PAFAH1B1,ACIN1,GSK3A,PTPN6,ADM2,ISG15,KARS1,INHBA,METRN,SPRY1,TBK1,BAD,MIR149,LACC1,TBC1D24,SMAD7,DDX3X,ADNP,ACHE,ZBTB7B,HCLS1,CARD9,CEBPB,MRTFB,BMPR1B,CD320,TMEM106A,BRCA1,MIR195,TPPP,AGRN,ARNT,TFAP2A,HOXB7,PAX2,CLCN2,ZNF580,LGR4,GAS6,HAX1,NECTIN2,ATP2A1,SPON2,MACROH2A1,FOXC2,PRKAR1B,ELL3,CEBPG,SPHK2,MAG,LRP1,STAT6,KAT2A,…	c5_GO.Biological.Process
Zinc.fingers.C2H2.type	1.36889e-07	4.92345e-05	0.690132	0.314918	1.86802	366	ZNF75A,ZNF460,ZNF140,ZNF605,MAZ,ZNF823,GLI1,ZNF517,ZNF564,ZNF709,ZNF490,ZNF443,ZNF799,ZNF567,ZNF395,ZNF181,EGR1,ZNF462,ZNF383,ZNF585A,ZNF585B,ZNF507,ZNF16,ZNF845,ZNF469,JAZF1,ZFP2,ZNF133,IKZF4,ZNF331,ZNF777,ZNF891,ZNF268,ZNF10,ZNF530,ZNF134,ZNF3,ZNF217,ZNF529,ZNF488,VEZF1,ZNF440,ZNF649,ZNF577,ZNF608,ZNF609,ZNF594,ZNF414,OSR2,ZNF770,ZNF276,ZNF808,ZNF701,ZNF865,ZNF524,ZNF600,ZNF512,ZNF341,ZNF664,ZN…	HUGO.Genes.groups	0.000919953	0.123619	0.477271	0.221656	1.53236	370	HIVEP2,ZNF606,ZNF140,ZNF566,ZNF605,ZNF44,ZNF580,ZNF581,ZNF555,ZNF827,ZNF296,ZNF526,ZNF358,ZNF615,ZNF841,ZNF614,ZNF432,ZNF668,ZNF646,ZNF592,ZNF133,ZNF767P,ZNF777,ZNF594,ZNF431,ZFP92,ZNF891,ZNF268,ZNF10,ZNF181,WIZ,ZNF576,ZNF426,ZNF169,ZNF77,ZNF853,ZNF2,ZNF341,ZNF786,OVOL2,MAZ,ZNF236,ZFX,ZNF843,ZNF443,ZNF564,ZNF709,ZNF490,ZNF799,ZNF860,ZNF544,ZNF8,ZNF460,ZNF121,ZNF75A,ZNF275,ZNF776,ZNF551,ZNF732,ZNF…	HUGO.Genes.groups
REACTOME_SIGNALING_BY_NUCLEAR_RECEPTORS	1.47424e-07	0.000557852	0.690132	0.363619	2.01226	201	TBL1XR1,RDH11,CTSD,NRIP1,GNG8,EGFR,USF2,GTF2A1,SP1,FOSB,CDKN1B,IGF1R,CPT1A,STAG2,BTC,H2AX,DDX5,MOV10,USF1,PTK2,RARA,CYP26B1,PTGES3,CXXC5,KDM4B,ALDH1A3,CAV2,ZNF217,RUNX1,NRAS,MYC,TNRC6A,SREBF1,DHRS3,KRAS,GTF2F1,PLTP,SHC1,TLE3,PRKCZ,SPHK1,JUN,GNB1,NR1H2,RXRA,CCND1,NCOA3,POLR2B,KAT5,FOS,RAD21,RARG,H3-3B,PPP5C,POU2F1,AKT2,SRF,NCOA2,GNB5,MAPK3,ABCA1,SMC1A,GNG7,PIK3R3,KDM1B,APOE,PDPK1,DLAT,TNRC6C,CARM1…	c2_curated.Canonical.Pathways	0.000280418	0.0126288	0.498493	-0.250131	-1.65686	239	EGFR,H4C8,H3C3,H2BC3,H2BC4,H2AC6,H4C2,H2BC11,H4C3,PIK3R3,H4C5,CHD1,H3C4,H2BC7,H2AC7,BCL2,H4C13,H3C11,H4C1,H3C1,ESR2,H2BC13,H3C10,H2BC14,H2AC14,IGF1R,POLR2B,CPT1A,H2BC12,H3C2,H2AC4,H2BC9,H3C7,PDK3,H3C8,H2BC10,DLD,KCTD6,NCOA2,H2AC20,ZDHHC7,FOXO3,H3C6,GNAI3,PIK3CA,MYB,H2BC17,H3C12,H4C16	c2_curated.Canonical.Pathways
GOBP_REGULATION_OF_INTRACELLULAR_SIGNAL_TRANSDUCTION	1.90819e-07	6.61449e-05	0.690132	0.235937	1.53906	1300	BAD,GPR137,AXL,LTBR,PAK6,EDAR,MEN1,MAP4K2,HEXIM1,TP53RK,TRAF1,UBR2,MAPKAP1,GABARAP,PLEKHG6,EPS8L2,EGFR,MECOM,PIK3CD,MAZ,TNFRSF1A,CACTIN,NOL3,LYN,TRIP6,ARHGEF12,SECTM1,NFE2L2,SMAD7,EFNA1,NOP2,MIR200C,PTPN6,SORBS3,FGD3,FGD2,BMP4,CAPN3,SESN1,DKK1,INAVA,PTPN13,IL11,IGF1R,SYVN1,AKT1S1,SH2B2,NR1D1,NOP53,CARD9,BCL6,MET,CBLC,PDGFA,SKIL,RAD9A,HNRNPK,ARHGAP29,MIRLET7F1,EPS8,NF2,PML,TAOK2,PLEKHG3,ARHGAP32,E…	c5_GO.Biological.Process	4.92755e-05	0.00854594	0.557332	0.179901	1.40064	1318	RBX1,MAP2K7,MCL1,GABARAP,DVL2,AXL,ALOX12B,PRMT1,IRF3,TMBIM6,MAP3K11,SIPA1,NKIRAS2,MAPKAPK5,NFAT5,KPTN,PRMT5,USP7,PAFAH1B1,GSK3A,MIR200C,PTPN6,TERF2IP,INHBA,FGD1,FAM89B,SPRY1,MKRN2,TBK1,TRIM8,BAD,GPR137,MIR149,SHC1,SMAD7,RFFL,DDX3X,HCLS1,CARD9,RPS15,NOP2,CHERP,RPS6KB1,TMEM106A,NBR1,BRCA1,MIR195,MIR497,CLEC16A,PPARA,FAM83D,OBSCN,GAS6,MIB2,NEK8,IL11,HAX1,HEXIM1,BAX,SOD2,HTRA2,ELL3,PLEKHG1,SPHK2,LRP1…	c5_GO.Biological.Process
GOBP_POSITIVE_REGULATION_OF_CELL_DIFFERENTIATION	5.72745e-07	0.000189902	0.659444	0.267941	1.66577	615	CYP27B1,BAD,AXL,ADIRF,METRN,ADM,SMARCD2,RIN2,PLXNB2,LYN,SRRT,ID2,SMAD7,CUL7,PPP1R13L,MIR200C,BMP4,PRKCH,BTG1,AP3D1,DKK1,HAPLN4,ACTB,BCL9L,CUX1,HOXA11,BCL6,JAG1,ISLR2,SKIL,CLCF1,ZNF16,NF2,MIR99B,SMAD3,HOXA5,CSF2,BTC,SOX12,PA2G4,BMPR1B,ETV4,EFEMP2,TGFB1I1,CAPRIN2,TGFB1,F11R,PTK2,ZHX3,ISG15,LAMC1,VDR,SPAG9,STK4,RARA,RND2,CYP26B1,PIEZO1,BMP6,ETV5,RPS6KA3,SOX6,MACROH2A1,ACVR2B,STK11,TP63,SHB,ZNF268,CE…	c5_GO.Biological.Process	0.000608955	0.0395165	0.477271	0.19949	1.46167	619	AXL,PRMT1,CAPRIN1,CUL7,ETV4,PRMT5,PAFAH1B1,ACIN1,MIR200C,ISG15,INHBA,METRN,BAD,GPC1,TBC1D24,SMAD7,ZFP36,ADNP,ZBTB7B,HCLS1,CEBPB,BMPR1B,ARNT,PAX2,CLCN2,LAMB2,RBM4,GAS6,CREBL2,HAX1,SOD2,MACROH2A1,RCOR1,ELL3,AKIRIN1,HOXA5,MAG,KAT2A,TGFB1,F11R,ACVR2B,TNFSF9,JUND,NOTCH1,ZNF385A,CD4,PTCH1,AAMDC,DPF1,IST1,ACTB,RPTOR,WNT7B,LIF,SPEN,HOXD3,PLXNB2,AP3D1,ADCY10,CSNK1E,ZNF268,BMAL1,EPHA4,EIF4G2,ARHGEF2,STAU2,…	c5_GO.Biological.Process
GOBP_CELL_ACTIVATION	6.4567e-07	0.000205162	0.659444	0.261861	1.64229	691	BAD,AXL,LTBR,CD247,MEN1,SNAP23,SMARCD2,FOSL2,MYO18A,THBD,PIK3CD,HAMP,LYN,ID2,SMAD7,ZFP36L2,ERCC1,PTPN6,FLOT2,BMP4,CAPN3,AP3D1,STOML2,ACTB,ARG2,IL11,EGR1,NPR2,SYVN1,DGKE,NR1D1,HOXA9,BCL6,PDGFA,CLCF1,MIR125A,SMAD3,FUT7,CSF2,LMO4,SOX12,DYSF,ITGB6,CXCR5,TGFB1,F11R,IRF2BP2,DHPS,RARA,SOS2,CYP26B1,DGKG,JAK1,STK11,SHLD1,KLRD1,NRARP,SH2B3,EXOSC3,SHB,P2RX4,CEBPB,RHOH,TMEM106A,C5AR1,PRKCD,GNAS,KMT5B,ABL1,ZN…	c5_GO.Biological.Process	0.0185763	0.252887	0.352488	0.172763	1.27832	699	RBX1,AXL,RELB,ZBTB7A,BLOC1S3,PKN1,TNFSF13,PRMT5,PTPN6,KARS1,INHBA,CYGB,BAD,JAG2,SMAD7,ZBTB7B,LAT,CEBPB,GSN,CD320,TCIRG1,TMEM106A,ALOX12,GAS6,NPR2,MERTK,FUT7,ENTPD2,IL11,NECTIN2,BAX,NAGLU,LOXL3,CEBPG,SPHK2,LRP1,STAT6,KAT2A,TGFB1,F11R,DGKE,GP1BB,TNFSF9,CAV1,C17orf99,TNFRSF13C,MARCHF7,ITGB2,CD4,RNF168,RABGEF1,PSMB10,DHPS,ACTB,GCLC,IMPDH2,PRKCE,HSPD1,AP3D1,NR1H3,MEN1,RASAL3,FERMT3,ABL1,FKBP1A,PIK3R2,…	c5_GO.Biological.Process
Small.nucleolar.RNAs..C.D.box	6.78406e-07	0.000183	0.659444	0.409193	2.07975	124	SNORD121A,SNORD121B,SNORD23,SNORD8,SNORD9,SNORD16,SNORD18A,SNORD18B,SNORD18C,SNORD4B,SNORD4A,SNORD42B,SNORD42A,SNORD38C,SNORD1A,SNORD1B,SNORD1C,SNORD101,SNORD100,SNORD88A,SNORD88B,SNORD88C,SNORD86,SNORD110,SNORD57,SNORD56,SNORD30,SNORD28,SNORD27,SNORD26,SNORD25,SNORD22,SNORD95,SNORD96A,SNORD10,SNORD68,SNORD53B,SNORD53,SNORD92,SNORD97,SNORD71,SNORD50A,SNORD50B,SNORD60,SNORD2,SNORD93,SNORD12B,SNORD…	HUGO.Genes.groups	0.00462941	0.315385	0.407018	0.270314	1.57836	127	SNORD10,SNORD1A,SNORD1B,SNORD1C,SNORD4A,SNORD42B,SNORD42A,SNORD4B,SNORD68,SNORD98,SNORD38C,SNORD62A,SNORD62B,SNORD97,SNORD88A,SNORD88B,SNORD88C,SNORD17,SNORD8,SNORD9,SNORD118,SNORD14C,SNORD14D,SNORD14E,SNORD37,SNORD99,SNORD12B,SNORD12C,SNORD12,SNORD89,SNORD19B,SNORD136,SNORD19C,SNORD19,SNORD69,SNORD91A,SNORD91B	HUGO.Genes.groups
GOBP_RESPONSE_TO_ENDOGENOUS_STIMULUS	7.1838e-07	0.000216531	0.659444	0.232156	1.51026	1208	CYP27B1,TIMP2,SCNN1A,MMRN2,MEN1,CTSD,EEF1A1,UBR2,ZNF106,ADM,CAPN2,NCOA6,FOSL2,HTRA4,EHD1,EGFR,PIK3CD,LYN,FSTL3,RHOQ,NFE2L2,SMAD7,SP1,WFIKKN1,ZFP36L2,TFAP4,FOSB,MIR200C,BMP4,CDKN1B,MIR196A1,SESN1,DKK1,ACTB,NR4A2,UFM1,EGR1,IGF1R,NPR2,BCL9L,AKT1S1,SH2B2,NSMF,SKOR1,NR1D1,CYP1B1,CARD9,HOXA10,HOXA11,SKIL,FNTA,HAS2,MIRLET7F1,PML,SMAD3,ABCA2,FUT7,TNS2,RECQL5,PAX9,BMPR1B,ITGB6,FKBP8,TGFB1I1,DDX5,FRS3,WNT1…	c5_GO.Biological.Process	1.66853e-05	0.00553588	0.57561	0.186767	1.45278	1264	RBX1,TGFBR3L,CCND1,NR3C1,ZBTB7A,PRMT1,SERPINB9,EHD1,PALM,PKN1,CD68,PRMT5,WFIKKN1,GSK3A,MIR200C,SLC2A1,INHBA,UBE2L3,KNSTRN,FAM89B,SPRY1,KMT2D,GPC1,MIR149,SHC1,SMAD7,TRIM41,ZFP36,ACHE,ZBTB7B,HCLS1,CARD9,CEBPB,BMPR1B,RPS6KB1,BRCA1,MIR195,MIR497,DYNC1LI2,AGRN,CTSK,ARNT,FKBP8,MIR196A1,PAX2,PPARA,SNX25,RBM4,RBM14,TRIB3,GAS6,NPR2,MIR455,ANO1,FUT7,CTNNA1,AGTRAP,WASF1,ABCA3,FOXC2,HTRA2,MMP2,HTR1D,PCSK6,FL…	c5_GO.Biological.Process
GOBP_REGULATION_OF_HEMOPOIESIS	7.63504e-07	0.000216531	0.659444	0.325354	1.87346	277	BAD,GPR137,AXL,SMARCD2,LYN,FSTL3,ID2,SMAD7,ZFP36L2,PTPN6,BMP4,HOXB8,AP3D1,ACTB,HOXA9,BCL6,JAG1,HOXA7,ZNF16,HOXA5,SOX12,TGFB1,ISG15,RARA,SOS2,CYP26B1,NRARP,SHB,CEBPB,RHOH,GABPA,ABL1,SMAP1,RUNX1,MYC,CD27,NFKBIA,P4HTM,JUNB,ARID1B,FOXJ1,NFKBIZ,ARID1A,PPP3CA,KITLG,SOX13,BRPF3,SPI1,FOXP1,NCKAP1L,FOXP3,MAPK11,IL4I1,PRKCZ,ZEB1,TSC22D1,BGLAP,CSF1,CSF3R,ZBTB7B,ZFP36L1,RPTOR,TNFSF4,CDC73,KAT5,FOS,SMARCC1,ME…	c5_GO.Biological.Process	0.00563435	0.150862	0.407018	0.217381	1.47086	290	AXL,PRMT1,ACIN1,PTPN6,ISG15,INHBA,BAD,GPR137,SMAD7,ZFP36,ZBTB7B,HCLS1,CEBPB,ARNT,HOXB8,BRPF1,GAS6,HAX1,LDB1,LOXL3,RCOR1,HOXA5,HOXA7,KAT2A,TGFB1,TNFSF9,L3MBTL1,CD4,EIF6,MYC,ACTB,RPTOR,LIF,AP3D1,ABL1,CARD11,PURB,MAPK11,RARG,XBP1,MDK,JAK3,ZFPM1,ING5,NCKAP1L,BRD1,RASGRP1,BMP4,SMARCE1,MTURN,MED1,RNF41,NEDD9,NF1,TYROBP,NFKBID,FSTL3,ZEB1,HOXA9,FOS,MEIS1,MEIS2,AMBRA1,SOCS1,MAPK14,XRCC6,STAT5B,SMARCD2,TGF…	c5_GO.Biological.Process
GOBP_VASCULATURE_DEVELOPMENT	7.66631e-07	0.000216531	0.659444	0.271556	1.68054	566	TMEM231,MMRN2,PLCD3,ADM,RIN2,ATP5F1B,HOXA1,ADM2,PIK3CD,CEMIP2,SGPL1,NFE2L2,SMAD7,SP1,CUL7,PTK7,EFNA1,MIR200C,ANXA2,BMP4,BTG1,MIR196A1,TNFAIP2,EGR1,MYLK,NPR2,HMGA2,CYP1B1,JAG1,PDGFA,HOXA3,HOXA7,DDAH1,HAS2,MIRLET7F1,MIR125A,MIR99B,PML,HSPG2,HOXA5,EFEMP2,ZFAND5,NOX5,TGFB1,PTK2,MCAM,STK4,GTF2I,IMMP2L,CITED2,TSPAN18,MIR15A,MIR16-1,RNF213,DAB2IP,COL15A1,JAK1,MIR101-1,ACVR2B,STK11,NRARP,LOXL1,PRICKLE1,P…	c5_GO.Biological.Process	0.0476974	0.391796	0.266351	0.169872	1.23618	578	FMNL3,CUL7,PTK7,MIR200C,ADM2,FKBP10,NOTCH3,MIR149,SHC1,SMAD7,BRCA1,MIR497,MIR196A1,NFATC3,AMOTL2,ADGRB2,NPR2,COL27A1,BAX,SOD2,FOXC2,NAGLU,MMP2,HOXA3,HOXA5,HOXA7,SPHK2,LRP1,TGFB1,ACVR2B,CAV1,TBX6,HDAC7,NOTCH1,RAMP1,SOX18,MCAM,B9D1,PRKD2,PDE2A,WNT7B,LIF,MIR15A,MIR16-1,MIR10B,WNK1,ANG,BSG,VEGFB,ABL1,PRCP,HOXA1,CITED1,XBP1,MDK,TNFSF12,MIR1224,MIR34A,LYL1,TYMP,MYDGF,TBX2,EFNA1,ETV2,ADAM15,FUT1,HEG1,NP…	c5_GO.Biological.Process
GOBP_CELLULAR_RESPONSE_TO_OXYGEN_CONTAINING_COMPOUND	8.34082e-07	0.000221436	0.659444	0.24713	1.58094	866	CYP27B1,RDH11,BAD,KCNK4,AXL,SYT7,SCNN1A,DPEP1,FBLN5,CTSD,UBR2,ZNF106,CAPN2,NRIP1,ERCC6L2,SLC38A2,EGFR,CACTIN,LYN,PLEC,RHOQ,SPON2,NFE2L2,SP1,PTK7,TFAP4,FOSB,CARF,WNT5B,CAPN3,CDKN1B,SESN1,ACTB,NR4A2,EGR1,IGF1R,NPR2,SH2B2,NSMF,NR1D1,CPT1A,CYP1B1,SCARB1,MET,ZNF16,MIRLET7F1,FUT7,CSF2,TNS2,RECQL5,HOXA2,USF1,PTK2,BRIP1,MBD5,VDR,LAMTOR1,RARA,SOS2,MIR15A,MIR16-1,DAB2IP,CYP26B1,BMP6,PPP1R1B,JAK1,RAP1GDS1,S…	c5_GO.Biological.Process	0.0139424	0.225153	0.38073	0.167574	1.26695	889	RBX1,MAP2K7,AXL,KDM6B,NR3C1,IRF3,RUVBL2,PALM,SIPA1,CD68,PTK7,PRMT5,GSK3A,INHBA,SLC29A1,AKR1A1,SLC25A23,BAD,KCNK4,SHC1,TRIM41,ADCY3,ZFP36,ACHE,ZBTB7B,CEBPB,RPS6KB1,BRCA1,MIR195,AGRN,PAX2,CPNE9,ZNF580,RBM4,TRIB3,GAS6,NPR2,MIR455,ANO1,SIGIRR,FUT7,CTNNA1,AGTRAP,SOD2,SPON2,FOXC2,HTRA2,MMP2,HTR1D,MCOLN1,SPHK2,LRP1,STAT6,PEX13,ABCA1,USF1,CAV1,JUND,NPTX1,PDGFC,LANCL2,GNRHR2,ZNF592,PTCH1,PDE2A,ACTB,GCLC,R…	c5_GO.Biological.Process
GOBP_EMBRYO_DEVELOPMENT	8.42073e-07	0.000221436	0.659444	0.248422	1.58336	848	TBL1XR1,TMEM231,HM13,PHLDB1,TLE6,PLCD3,BCOR,MBP,ADM,CAPN2,IFT122,PTPN18,EVX1,SEPTIN7,EGFR,HOXA1,ACSL4,PLXNB2,TRIP6,KEAP1,NFE2L2,ID2,PTK7,GLI1,EFNA1,PPP1R13L,ERCC1,MIR200C,CIR1,BMP4,WNT5B,KRT8,HOXB6,HOXB7,HOXB8,HOXB9,DKK1,RCN1,SLC35E2B,TEAD3,TASOR,TFAP2A,HMGA2,ELL,CHD8,HOXA9,HOXA10,HOXA11,ECE1,JAG1,PDGFA,SKIL,HOXA3,HOXA7,NF2,SMAD3,HOXA4,HOXA5,HOXA6,CSF2,LMO4,FKBP8,TGFB1I1,HOXA2,POLG2,STMN3,ZFAND5,…	c5_GO.Biological.Process	1.19915e-06	0.000831885	0.643552	0.213028	1.61008	875	DVL2,FOXD3,KDM6B,TDRKH,NR2C2,PRMT1,DLG3,RUVBL2,PTK7,PAFAH1B1,MIR200C,INHBA,FKBP10,CLUAP1,CBY1,JAG2,CECR2,MAFG,ECE1,CEBPB,TPRN,BRCA1,ARNT,FKBP8,TFAP2A,HOXB6,HOXB7,HOXB8,HOXB9,PAX2,KAT14,COL27A1,TOP1,C1orf43,BAX,CDC40,LDB1,MACROH2A1,FOXC2,NAGLU,LOXL3,MMP2,PCSK6,RPL13,INO80B,HOXA3,HOXA5,HOXA6,HOXA4,HOXA7,ZNF358,FBXW4,KAT2A,TGFB1,ACVR2B,KRT19,TBX6,NOTCH1,ITGB2,SLC25A34,SEC24C,SOX18,B9D1,PTCH1,ITGB4,L…	c5_GO.Biological.Process
GOBP_REGULATION_OF_RESPONSE_TO_STRESS	9.35306e-07	0.000237755	0.659444	0.238267	1.53835	1067	BAD,LTBR,MMRN2,NT5C2,EDAR,FBLN5,MEN1,MAP4K2,HEXIM1,MAPKAP1,SMARCD2,TRAFD1,SLC38A2,EGFR,MECOM,THBD,TNFRSF1A,CACTIN,HAMP,NOL3,LYN,NFE2L2,ERCC1,MIR141,PTPN6,ANXA2,FLOT2,BMP4,ZDHHC5,SMCHD1,SESN1,ACTB,INAVA,ARG2,TRIM65,MYLK,IGF1R,SYVN1,PNKP,NR1D1,HMGA2,NOP53,CARD9,BCL6,NT5E,PDGFA,SH2D1A,SKIL,RAD9A,HNRNPK,DDAH1,TMEM259,PML,SMAD3,FUT7,TAOK2,H2AX,RECQL5,STK24,NLRP1,DDX5,MGLL,TPT1,TGFB1,RTN4R,HAPSTR1,USF1…	c5_GO.Biological.Process	0.00144418	0.0720295	0.45506	0.174999	1.34194	1058	MAP2K7,PRMT1,IRF3,SERPINB9,TMBIM6,MARK4,RUVBL2,MAP3K11,DNAJC7,ERCC4,RNF26,SENP3,ATXN7L3,PAFAH1B1,MIR141,PTPN6,ISG15,KARS1,TERF2IP,MKRN2,NT5C2,TBK1,SLC25A23,BAD,MIR149,LACC1,TBC1D24,TRIM41,ZFP36,DDX3X,UBXN1,SPATA2,SIRT7,ZBTB7B,CARD9,CEBPB,TMEM259,RNFT1,MGLL,NBR1,BRCA1,ALOX12,MIR195,ARNT,OGG1,PPARA,USP19,RBM14,LGR4,FUT7,CLN3,NECTIN2,HEXIM1,BAX,MACROH2A1,FOXC2,NAGLU,PRKAR1B,ELL3,INO80B,CEBPG,KAT2A,G…	c5_GO.Biological.Process
GOBP_BLOOD_VESSEL_MORPHOGENESIS	1.10763e-06	0.000272478	0.643552	0.280637	1.70653	478	MMRN2,PLCD3,ADM,RIN2,ATP5F1B,HOXA1,ADM2,PIK3CD,CEMIP2,SGPL1,NFE2L2,SMAD7,SP1,CUL7,EFNA1,MIR200C,ANXA2,BMP4,BTG1,MIR196A1,TNFAIP2,MYLK,NPR2,HMGA2,CYP1B1,JAG1,PDGFA,HOXA3,HOXA7,DDAH1,HAS2,MIRLET7F1,MIR125A,MIR99B,PML,HSPG2,HOXA5,EFEMP2,NOX5,TGFB1,PTK2,MCAM,STK4,GTF2I,CITED2,TSPAN18,MIR15A,MIR16-1,RNF213,DAB2IP,COL15A1,JAK1,MIR101-1,NRARP,PDCD6,SHB,RECK,BRCA1,C5AR1,ATP2B4,ABL1,PKM,MIR29A,MIR29B1,JMJ…	c5_GO.Biological.Process	0.0586265	0.407241	0.24134	0.17203	1.23423	485	FMNL3,CUL7,MIR200C,ADM2,FKBP10,NOTCH3,MIR149,SHC1,SMAD7,BRCA1,MIR497,MIR196A1,AMOTL2,ADGRB2,NPR2,COL27A1,BAX,FOXC2,NAGLU,MMP2,HOXA3,HOXA5,HOXA7,LRP1,TGFB1,CAV1,TBX6,HDAC7,NOTCH1,RAMP1,SOX18,MCAM,PRKD2,WNT7B,MIR15A,MIR16-1,MIR10B,WNK1,ANG,BSG,VEGFB,ABL1,PRCP,HOXA1,CITED1,XBP1,MDK,TNFSF12,MIR1224,MIR34A,TYMP,MYDGF,TBX2,EFNA1,ETV2,ADAM15,FUT1,HEG1,NPRL3,OVOL2,JMJD6,EPHB3,BMP4,MIR640,MED1,RAPGEF3,MIR…	c5_GO.Biological.Process
GOBP_REGULATION_OF_ANATOMICAL_STRUCTURE_MORPHOGENESIS	1.22806e-06	0.000292662	0.643552	0.258398	1.61534	657	CDC42EP3,PHLDB1,MMRN2,METRN,ADM,SEPTIN7,ADM2,PIK3CD,CEMIP2,PLXNB2,RHOQ,NFE2L2,SP1,CUL7,PTK7,EFNA1,FGD3,FGD2,SEMA4B,BMP4,WNT5B,BTG1,HOXB7,DKK1,RAC3,BCL9L,CUX1,NSMF,HMGA2,CYP1B1,HOXA11,BCL6,JAG1,ISLR2,PDGFA,SKIL,DDAH1,SEMA3B,EPS8,NF2,MIR125A,MIR99B,PML,HSPG2,HOXA5,TAOK2,CAMSAP1,CFDP1,PAX9,CAPRIN2,MOV10,WNT10A,TGFB1,RTN4R,F11R,PTK2,SPAG9,GTF2I,CITED2,TSPAN18,RND2,VAT1,MIR15A,MIR16-1,DAB2IP,JAK1,STK1…	c5_GO.Biological.Process	0.0160829	0.241057	0.352488	0.174201	1.28238	669	DVL2,FMNL3,CAPRIN1,PALM,PKN1,CUL7,PTK7,PAFAH1B1,ADM2,FGD1,METRN,SPRY1,CFDP1,MOV10,TBC1D24,ADNP,BRCA1,UST,HOXB7,PAX2,CPNE9,LGR4,ADGRB2,MYL12B,CDC42EP3,FOXC2,HOXA5,MAG,TGFB1,F11R,ZMYM4,NOTCH1,ITGB2,CDC42EP1,PRKD2,TBCCD1,IST1,LBX2,FZD1,LIF,MIR15A,MIR16-1,BCL11A,PLXNB2,WNK1,ADCY10,POGLUT1,EPHA4,HEXB,EIF4G2,HOXC11,VEGFB,ABL1,MKS1,WNT5B,STAU2,PARVB,PLXNB1,XBP1,WNT10A,MDK,CELSR2,SIX4,TNFSF12,MIR1224,WNT…	c5_GO.Biological.Process
GOBP_EPITHELIUM_DEVELOPMENT	1.36097e-06	0.000314508	0.643552	0.248062	1.58158	847	TMEM231,CYP27B1,BAD,MMRN2,EDAR,ADM,IFT122,FOSL2,EGFR,PIK3CD,TNFRSF1A,LSR,HSF4,PLXNB2,PLEC,KEAP1,ID2,ANXA4,UPK2,SMAD7,PTK7,GLI1,MIR200C,BMP4,PRKCH,WNT5B,BTG1,CDKN1B,HOXB7,DKK1,ACTB,ARG2,NPR2,TFAP2A,CPT1A,HOXA11,ECE1,MET,JAG1,PDGFA,SKIL,HOXA7,RAB1A,NF2,MIR99B,PML,SMAD3,HOXA5,LMO4,HOXC13,ETV4,FKBP8,FRMD6,TGFB1I1,GZF1,CDHR2,WNT10A,TGFB1,F11R,MKKS,VDR,STK4,RARA,CITED2,MIR16-1,CYP26B1,FOXB1,BMP6,TCAP,M…	c5_GO.Biological.Process	1.20862e-07	0.000115287	0.690132	0.221106	1.66731	868	DVL2,CCND1,KDM6B,NR3C1,ALOX12B,DLG3,SIPA1,PTK7,ETV4,PAFAH1B1,OVOL1,GSK3A,MIR200C,INHBA,KAZN,SPRY1,CLUAP1,BAD,FZR1,CBY1,PYGO2,JAG2,SMAD7,ZFP36,CECR2,MAFG,ECE1,FASN,CEBPB,UPK2,TPRN,ALOX12,FKBP8,TFAP2A,HOXB7,PAX2,PERCC1,ESRP1,CLCN2,LAMB2,RBM4,LGR4,NPR2,COL27A1,BAX,LDB1,MACROH2A1,FOXC2,NAGLU,LOXL3,MMP2,HOXA5,HOXA7,ZNF358,STAT6,KAT2A,TGFB1,F11R,ACVR2B,CAV1,HOXC13,KRT15,KRT19,TBX6,NOTCH1,LHX3,SOX18,RAB…	c5_GO.Biological.Process
GOBP_NEGATIVE_REGULATION_OF_DEVELOPMENTAL_PROCESS	1.47635e-06	0.000331136	0.643552	0.258794	1.62099	668	GPR137,BCOR,MEN1,TSKU,EGFR,LYN,FSTL3,NFE2L2,ID2,SMAD7,ZFP36L2,EFNA1,SEMA4B,BMP4,CDKN1B,HOXB8,DKK1,ACTB,PTPN13,NPR2,NR1D1,HOXA9,BCL6,JAG1,SKIL,HOOK3,HOXA7,BICRAL,SEMA3B,NF2,MIR125A,PML,SMAD3,HSPG2,HOXA5,TGFB1I1,HOXA2,TPT1,TGFB1,RTN4R,SPAG9,STK4,GTF2I,RARA,CITED2,VAT1,MIR15A,MIR16-1,FAT3,DAB2IP,ABCA5,BHLHE41,SOX6,STK11,NRARP,PRICKLE1,TP63,SHB,NBR1,GABPA,YTHDF2,ATP2B4,ULK1,MIR29A,MIR29B1,SOX9,TRIB3,…	c5_GO.Biological.Process	0.0720268	0.434388	0.216543	0.159403	1.17719	691	CCND1,PRMT1,PRMT5,GSK3A,INHBA,SPRY1,NOTCH3,GPR137,MIR149,SMAD7,ZFP36,ZBTB7B,NBR1,CTSK,HOXB8,PAX2,PPARA,USP19,TRIB3,NFATC3,ADGRB2,GAS6,NPR2,CTNNA1,LDB1,SOD2,ZNF296,ABCG1,FOXC2,LOXL3,AKIRIN1,HOXA5,HOXA7,MAG,ABCA1,TGFB1,CAV1,TBX6,HDAC7,NOTCH1,ZHX2,STC2,SRSF6,DNAJB11,PTCH1,SDHAF2,MYC,ACTB,MIR15A,MIR16-1,BCL11A,ZBED6,BMAL1,EPHA4,BICRAL,IL17RD,RARB,NR1H3,MEN1,CDH3,TENT5C,BICRA,SYCP2,DPF2,MAPK11,CITED1,…	c5_GO.Biological.Process
GOBP_EPITHELIAL_CELL_DIFFERENTIATION	1.7108e-06	0.000372759	0.643552	0.276663	1.68596	486	TMEM231,CYP27B1,BAD,FOSL2,TNFRSF1A,HSF4,PLEC,KEAP1,ID2,ANXA4,UPK2,PTK7,GLI1,MIR200C,BMP4,PRKCH,WNT5B,BTG1,CDKN1B,NPR2,CPT1A,MET,JAG1,SKIL,HOXA7,RAB1A,NF2,MIR99B,SMAD3,HOXA5,ETV4,FRMD6,TGFB1I1,CDHR2,TGFB1,F11R,VDR,STK4,RARA,CYP26B1,FOXB1,BMP6,MACROH2A1,ACVR2B,FZD2,SLC9A2,LTA4H,TP63,MYO9A,CEBPB,CCDC78,BFSP1,ABL1,MIR29B1,SOX9,KRT7,KRT86,THRB,CFLAR,VEZF1,IKBKB,ACADVL,GRHL2,B4GALT1,WNT7B,JAG2,SHARPIN,…	c5_GO.Biological.Process	0.000107588	0.013242	0.538434	0.217829	1.56075	489	CCND1,KDM6B,SIPA1,PTK7,ETV4,PAFAH1B1,OVOL1,GSK3A,MIR200C,KAZN,SPRY1,BAD,FZR1,JAG2,ZFP36,MAFG,FASN,CEBPB,UPK2,TPRN,PAX2,PERCC1,ESRP1,CLCN2,LAMB2,RBM4,NPR2,COL27A1,MACROH2A1,FOXC2,HOXA5,HOXA7,TGFB1,F11R,ACVR2B,CAV1,KRT15,KRT19,NOTCH1,LHX3,SOX18,RAB1B,B9D1,SRSF6,PTCH1,PDE2A,RPTOR,WNT7B,FZD1,LIF,RAB25,BMAL1,RARB,ABL1,CDH3,WNT5B,POU4F3,CCNO,CITED1,RARG,ALDOC,IRF6,CASP3,EXTL3,CCDC78,MIR34A,GRHL2,ETV2,F…	c5_GO.Biological.Process
GOBP_EMBRYONIC_SKELETAL_SYSTEM_DEVELOPMENT	1.77063e-06	0.000375079	0.643552	0.437138	2.14362	98	HOXA1,BMP4,HOXB6,HOXB7,HOXB8,HOXB9,TFAP2A,HOXA9,HOXA11,HOXA3,HOXA7,SMAD3,HOXA4,HOXA5,HOXA6,HOXA2,IFT140,SATB2,GRHL2,WNT9A,OSR2,HOXB3,HOXB5,HOXC5,HOXC6,HOXC9,HOXC4,NDST1,DYNC2I1,ZEB1,HOXC11,HOXB4,RUNX2,MBTD1,PDGFRA,EXT1,NOG,FGFR2,WNT11,ACVR2A,RDH10,TGFBR1,SMAD2	c5_GO.Biological.Process	3.1248e-06	0.00158969	0.627257	0.393992	2.22609	100	TFAP2A,HOXB6,HOXB7,HOXB8,HOXB9,FOXC2,HOXA3,HOXA5,HOXA6,HOXA4,HOXA7,HOXD3,HOXD4,HOXC11,MKS1,HOXA1,SIX4,GRHL2,RDH10,HOXC5,HOXC6,HOXC9,BMP4,SLC39A1,HOXC4,TBX1,ZEB1,HOXA9,HOXA11,MBTD1,MED12,WNT11,NKX3-2,TGFBR2,HOXD10,FUZ,DLG1,HOXB3,HOXB4,HOXB5,MEGF8,BMP7,HOXB2	c5_GO.Biological.Process
GOBP_REGULATION_OF_CELL_DEVELOPMENT	2.19987e-06	0.000453411	0.627257	0.262499	1.62652	578	BAD,GPR137,AXL,METRN,SMARCD2,TNFRSF1A,PLXNB2,LYN,FSTL3,SRRT,ID2,SMAD7,CUL7,ZFP36L2,PTPN6,ANXA2,SEMA4B,BMP4,PRKCH,HOXB8,AP3D1,RAC3,HAPLN4,ACTB,NPR2,CUX1,NR1D1,HOXA9,HOXA11,BCL6,JAG1,ISLR2,SKIL,HOOK3,HOXA7,CLCF1,ZNF16,SEMA3B,NF2,HOXA5,SOX12,CAPRIN2,TGFB1,RTN4R,F11R,ISG15,RARA,SOS2,RND2,CYP26B1,BHLHE41,ETV5,STK11,NRARP,SHB,CEBPB,RHOH,RECK,GABPA,TIAM2,YTHDF2,ABL1,ULK1,MIR29B1,ZNF488,SMAP1,RUNX1,PER2,…	c5_GO.Biological.Process	0.0100108	0.197396	0.38073	0.181632	1.32641	596	AXL,PRMT1,CAPRIN1,CUL7,PRMT5,PAFAH1B1,ACIN1,GSK3A,PTPN6,ISG15,INHBA,METRN,BAD,GPR137,TBC1D24,SMAD7,ZFP36,ADNP,ZBTB7B,HCLS1,CEBPB,ARNT,HOXB8,BRPF1,CLCN2,GAS6,NPR2,CTNNA1,HAX1,LDB1,LOXL3,RCOR1,ELL3,HOXA5,HOXA7,MAG,KAT2A,TGFB1,F11R,TNFSF9,TBX6,NOTCH1,L3MBTL1,DNAJB11,CD4,EIF6,IST1,MYC,ACTB,RPTOR,LIF,SPEN,BCL11A,PLXNB2,AP3D1,ADCY10,BMAL1,EPHA4,EIF4G2,ABL1,STAU2,CARD11,PURB,PLXNB1,MAPK11,RARG,PCM1,XBP1…	c5_GO.Biological.Process
GOBP_SKELETAL_SYSTEM_DEVELOPMENT	2.36587e-06	0.000474793	0.627257	0.294896	1.75087	370	FOSL2,TSKU,HOXA1,AMER1,SGPL1,SMAD7,WFIKKN1,ANXA2,BMP4,WNT5B,HOXB6,HOXB7,HOXB8,HOXB9,HAPLN4,BMP8B,NPR2,TFAP2A,HMGA2,HOXA9,HOXA10,HOXA11,COL9A2,HOXA3,HOXA7,HAS2,SMAD3,HOXA4,HOXA5,HOXA6,BMPR1B,ITGB6,HOXA2,ZFAND5,TGFB1,MKKS,VDR,RARA,CITED2,CYP26B1,BMP6,RPS6KA3,SOX6,ACVR2B,IFT140,SATB2,MIGA2,TP63,LRRK1,GNAS,SOX9,RUNX1,PBXIP1,IFT25,GRHL2,NFATC2,DHRS3,WNT7B,JAG2,WNT9A,OSR2,PRDX1,HOXB3,HOXB5,HOXC5,HOXC6,…	c5_GO.Biological.Process	2.58762e-06	0.00158969	0.627257	0.261455	1.81712	381	PAFAH1B1,WFIKKN1,CTC1,JAG2,SMAD7,TLE5,BMPR1B,CTSK,TFAP2A,HOXB6,HOXB7,HOXB8,HOXB9,NPR2,COL27A1,MIGA2,ARID5B,FOXC2,HSD17B1,MMP2,RPL13,ANKRD11,HOXA3,HOXA5,HOXA6,HOXA4,HOXA7,KAT2A,TGFB1,ACVR2B,PDGFC,WNT7B,HOXD3,HOXD4,HEXB,RARB,HOXC11,MKS1,WNT5B,ASH1L,HOXA1,PLXNB1,SPNS2,MAPK11,LRRK1,RARG,PBXIP1,MDK,SIX4,AKAP13,WNT2B,MKKS,TP53,GNAS,GRHL2,WDR5,PEX7,RDH10,BBS1,SH3PXD2B,HOXC5,HOXC6,HOXC9,RAI1,BBS2,BMP4,RA…	c5_GO.Biological.Process
GOBP_POSITIVE_REGULATION_OF_INTRACELLULAR_SIGNAL_TRANSDUCTION	2.65642e-06	0.000519432	0.627257	0.256792	1.61023	688	BAD,GPR137,AXL,LTBR,EDAR,MAP4K2,HEXIM1,EGFR,PIK3CD,MAZ,TNFRSF1A,LYN,TRIP6,SECTM1,EFNA1,PTPN6,SORBS3,BMP4,DKK1,INAVA,IL11,IGF1R,CARD9,PDGFA,SKIL,RAD9A,PML,TAOK2,ERBB3,FRMD6,DDX5,TGFB1,RTN4R,NOS1AP,F11R,PTK2,SPAG9,LAMTOR1,SOS2,MIR15A,MIR16-1,DAB2IP,BMP6,MEIS3,RPL26,CXXC5,SIK3,P2RX4,TMEM106A,C5AR1,LRRK1,CAVIN3,ABL1,MIR29A,NACC2,UBE2V1,SOX9,PLEKHG5,CAV2,HIC1,JMJD8,WDR24,TRIM8,DNAJC27,CFLAR,IGFBP4,TRA…	c5_GO.Biological.Process	0.000278483	0.0248253	0.498493	0.198829	1.47047	705	RBX1,MAP2K7,MCL1,DVL2,AXL,ALOX12B,PRMT1,IRF3,MAP3K11,NFAT5,PTPN6,TERF2IP,INHBA,TBK1,TRIM8,BAD,GPR137,SHC1,DDX3X,HCLS1,CARD9,RPS15,CHERP,RPS6KB1,TMEM106A,CLEC16A,GAS6,MIB2,IL11,HAX1,HEXIM1,BAX,SPHK2,TGFB1,F11R,DOK4,CAV1,CSNK1A1,TRIM52,NOTCH1,PDGFC,ZNF385A,PRKD2,CD4,MYC,SFPQ,RNF167,TSPYL5,RPTOR,WNT7B,LIF,MIR15A,MIR16-1,PRKCE,LAMTOR2,PLEKHG5,ADCY10,INAVA,MADD,MAP4K2,ABL1,FKBP1A,BECN1,RPL23,ABCA7,CAR…	c5_GO.Biological.Process
GOBP_NEGATIVE_REGULATION_OF_RESPONSE_TO_STIMULUS	3.04592e-06	0.000580705	0.627257	0.22553	1.46977	1247	TLE6,MMRN2,NT5C2,MEN1,UBR2,ADM,IFT122,MAPKAP1,PTPN18,TRAFD1,HTRA4,TSKU,EGFR,MECOM,THBD,MAZ,TNFRSF1A,CACTIN,HAMP,NOL3,AMER1,LYN,FSTL3,NFE2L2,SMAD7,GLI1,WFIKKN1,EFNA1,ERCC1,MIR141,MIR200C,PTPN6,ANXA2,SEMA4B,BMP4,TRABD2B,SMCHD1,SESN1,DKK1,NR4A2,ARG2,TRIM65,EGR1,IGF1R,BCL9L,TRABD2A,SYVN1,AKT1S1,SKOR1,NR1D1,HMGA2,NOP53,CHD8,BCL6,NT5E,MET,CBLC,PDGFA,SH2D1A,SKIL,DDAH1,SEMA3B,MIRLET7A1,MIRLET7F1,NF2,MIRL…	c5_GO.Biological.Process	0.000784471	0.0478904	0.477271	0.173804	1.35173	1244	RBX1,MCL1,TMEM88,PHPT1,ZBTB7A,PRMT1,SERPINB9,TMBIM6,RUVBL2,PALM,ERCC4,MAPKAPK5,RNF26,KPTN,SENP3,USP7,PAFAH1B1,WFIKKN1,GSK3A,MIR141,MIR200C,PTPN6,ISG15,CDK3,FAM89B,SPRY1,MKRN2,NT5C2,TBK1,GPC1,MIR149,CBY1,TBC1D24,SMAD7,ZFP36,RFFL,DDX3X,UBXN1,ZBTB7B,TLE5,RPS6KB1,BRCA1,ALOX12,MIR195,MIR497,ARNT,OGG1,PPARA,SNX25,LGR4,GAS6,SIGIRR,CTNNA1,BICD1,BAX,SOD2,CHMP6,HTRA2,LOXL3,ELL3,LRP1,STAT6,GGT7,ZFYVE28,TGFB…	c5_GO.Biological.Process
GOBP_NEGATIVE_REGULATION_OF_PROGRAMMED_CELL_DEATH	3.18941e-06	0.000593231	0.627257	0.257919	1.61211	656	AXL,TNFRSF18,DPEP1,MAPKAP1,CLDN7,SIRT5,MYO18A,EGFR,MECOM,MAZ,NOL3,NAA38,MAEA,NFE2L2,ANXA4,EFNA1,BMP4,PRKCH,CAPN3,CDKN1B,KRT18,DKK1,NR4A2,ARG2,UFM1,IL11,IGF1R,TFAP2A,SYVN1,HMGA2,CHD8,BCL6,MET,SET,CLCF1,HNRNPK,ZNF16,MIRLET7F1,SMAD3,CSF2,BTC,CFDP1,ERBB3,PA2G4,FKBP8,TPT1,PTK2,CITED2,FOXB1,RPS6KA3,MIR101-1,MEIS3,CLN3,ZNF268,IVNS1ABP,CEBPB,BRCA1,TNFAIP8,PRKCD,ABL1,TMEM109,MIR29B1,SOX9,MAPK8,YWHAZ,CFLAR…	c5_GO.Biological.Process	0.0231416	0.276792	0.352488	0.174326	1.28298	666	MCL1,AXL,THAP11,CCND1,NAA35,BCL2L12,SERPINB9,TMBIM6,NAA38,DPP9,CFDP1,AKR1A1,SHC1,RFFL,DDX3X,ADNP,HCLS1,CLDN7,CEBPB,RPS6KB1,BRCA1,ALOX12,MIR195,FKBP8,TFAP2A,PAX2,OGG1,PPARA,SON,GAS6,MERTK,CLN3,IL11,CTNNA1,HAX1,BAX,SOD2,MAEA,FOXC2,HTRA2,HYPK,ELL3,MAG,CAV1,MARCHF7,NOTCH1,USP47,LHX3,ZNF385A,SRSF6,YWHAZ,UBE2Z,MYC,GCLC,FZD1,QARS1,STK40,BAG1,HSPD1,ZNF268,CSNK2A2,ABL1,PSME3,BECN1,ARHGEF2,SYCP2,PRR5,CBX4,…	c5_GO.Biological.Process
GOBP_EMBRYO_DEVELOPMENT_ENDING_IN_BIRTH_OR_EGG_HATCHING	3.45592e-06	0.000627496	0.627257	0.274927	1.68676	527	TBL1XR1,TMEM231,HM13,TLE6,PLCD3,BCOR,ADM,CAPN2,IFT122,PTPN18,EVX1,EGFR,HOXA1,ACSL4,PLXNB2,TRIP6,KEAP1,PTK7,CIR1,BMP4,KRT8,HOXB6,HOXB7,HOXB8,HOXB9,DKK1,RCN1,SLC35E2B,TFAP2A,ELL,CHD8,HOXA9,HOXA11,ECE1,SKIL,HOXA3,HOXA7,SMAD3,HOXA4,HOXA5,HOXA6,CSF2,LMO4,FKBP8,HOXA2,POLG2,STMN3,ZFAND5,TGFB1,WDR74,STK4,RARA,CITED2,MGAT1,FOXB1,TCAP,IFT140,FZD2,SATB2,NRARP,PRICKLE1,PDCD6,CEBPB,BRCA1,GABPA,ABL1,SOX9,GRHL3…	c5_GO.Biological.Process	0.000134952	0.0156034	0.518848	0.221167	1.60645	540	DVL2,FOXD3,PRMT1,PTK7,FKBP10,CLUAP1,CBY1,JAG2,CECR2,MAFG,ECE1,CEBPB,BRCA1,ARNT,FKBP8,TFAP2A,HOXB6,HOXB7,HOXB8,HOXB9,PAX2,C1orf43,FOXC2,RPL13,HOXA3,HOXA5,HOXA6,HOXA4,HOXA7,ZNF358,KAT2A,TGFB1,KRT19,TBX6,NOTCH1,SLC25A34,SEC24C,SOX18,B9D1,PTCH1,WNT7B,FZD1,LIF,HOXD3,HOXD4,PLXNB2,ZBED6,CMIP,POGLUT1,HOXC11,PFN1,ABL1,MKS1,TENT5C,NMT1,HOXA1,CCDC24,CITED1,RARG,KRT8,BCL2L11,SIX4,CASP3,TP53,SCO2,GRHL2,RDH10,…	c5_GO.Biological.Process
GOBP_CELL_CELL_ADHESION	3.91432e-06	0.0006942	0.610527	0.265311	1.63527	554	BAD,TLN2,MBP,SMARCD2,CLDN7,EGFR,ARVCF,PLXNB2,LYN,FSTL3,SMAD7,PTK7,MIR141,PTPN6,ANXA2,FLOT2,BMP4,KRT18,AP3D1,ACTB,ARG2,CLSTN1,CYP1B1,BCL6,NT5E,JAG1,FUT4,HAS2,NF2,MIRLET7E,MIR125A,PKP1,FUT7,CDH16,SOX12,CDHR2,TGFB1,F11R,PTK2,DHPS,RARA,CITED2,ESAM,CD164,FAT3,KIFC3,PIEZO1,BMP6,JAK1,NRARP,PRICKLE1,SH2B3,SHB,CELSR2,CEBPB,RHOH,PRKCD,GNAS,NTNG2,YTHDF2,ABL1,SOX9,EMILIN1,METAP1,RUNX1,RELA,DLG4,CD27,CSRP1,WN…	c5_GO.Biological.Process	0.233444	0.660515	0.112843	0.146923	1.07018	585	DLG3,NFAT5,PTK7,CDH24,MIR141,PTPN6,BAD,SHC1,SMAD7,ZBTB7B,CLDN7,CEBPB,ALOX12,PPARA,FUT7,CTNNA1,NECTIN2,LOXL3,MAG,TGFB1,F11R,TNFSF9,CAV1,TNFRSF13C,MARCHF7,NOTCH1,ITGB2,CDC42EP1,ITGA10,ICAM3,CD4,DHPS,ITGAE,ACTB,WNT7B,PIP5K1C,ARVCF,PLXNB2,WNK1,HSPD1,AP3D1,STK10,RASAL3,FERMT3,ABL1,CDH3,CDH16,CCDC88B,CARD11,NRXN2,SWAP70,KRT18,XBP1,VAV1,MDK,JAK3,CELSR2,CASP3,SOX2,EFNB3,GNAS,IGDCC4,IZUMO1,NCKAP1L,PPM1F,R…	c5_GO.Biological.Process
GOBP_EMBRYONIC_MORPHOGENESIS	4.7646e-06	0.000825793	0.610527	0.277155	1.68146	458	TMEM231,PHLDB1,MBP,ADM,IFT122,HOXA1,PLXNB2,ID2,PTK7,GLI1,EFNA1,MIR200C,BMP4,WNT5B,HOXB6,HOXB7,HOXB8,HOXB9,DKK1,TASOR,TFAP2A,HMGA2,HOXA9,HOXA10,HOXA11,ECE1,HOXA3,HOXA7,NF2,SMAD3,HOXA4,HOXA5,LMO4,TGFB1I1,HOXA2,TGFB1,MKKS,STK4,RARA,CITED2,CYP26B1,TCAP,MACROH2A1,ACVR2B,IFT140,KIF16B,FZD2,SATB2,PRICKLE1,FOXE1,TP63,CLASP1,RECK,ALDH1A3,YTHDF2,ABL1,SOX9,GRHL3,DVL1,TBX2,GRHL2,LUZP1,WNT7B,JAG2,RACK1,OSR2,H…	c5_GO.Biological.Process	2.95692e-06	0.00158969	0.627257	0.243872	1.74226	478	DVL2,KDM6B,PTK7,MIR200C,INHBA,CLUAP1,JAG2,CECR2,ECE1,TPRN,TFAP2A,HOXB6,HOXB7,HOXB8,HOXB9,PAX2,BAX,LDB1,MACROH2A1,FOXC2,NAGLU,MMP2,HOXA3,HOXA5,HOXA4,HOXA7,ZNF358,FBXW4,KAT2A,TGFB1,ACVR2B,TBX6,NOTCH1,ITGB2,SOX18,B9D1,PTCH1,ITGB4,LBX2,WNT7B,FZD1,HOXD3,HOXD4,PLXNB2,WNK1,MFAP2,POGLUT1,RARB,HOXC11,PFN1,ABL1,MKS1,WNT5B,FOXE1,POU4F3,DUSP1,HOXA1,ALDH1A3,RARG,BCL2L11,SIX4,CASP3,WNT2B,MKKS,SOX2,TP53,GRHL2,S…	c5_GO.Biological.Process
GOBP_POSITIVE_REGULATION_OF_PROTEIN_METABOLIC_PROCESS	5.36385e-06	0.000892255	0.610527	0.235912	1.51468	979	BAD,TNFRSF18,MAP4K2,CTSD,MBP,CHFR,MAPKAP1,PTPA,GABARAP,BAZ2A,EGFR,FBXL5,SAE1,TNFRSF1A,HAMP,AMER1,PLXNB2,LYN,KEAP1,NFE2L2,ATG14,SMAD7,SP1,EFNA1,ANXA2,BMP4,CAPN3,TRABD2B,CDKN1B,DKK1,CENPX,INAVA,IL11,TRIM65,EGR1,BAZ1B,CIRBP,TRABD2A,NSMF,HMGA2,CYP1B1,NOP53,CARD9,PHF23,PDGFA,FNTA,CLCF1,RAB1A,TMEM259,PML,SMAD3,RALB,ABCA2,CSF2,TAOK2,ERBB3,NLRP1,TGFB1I1,CAPRIN2,TGFB1,NOS1AP,PTK2,TESK1,STX5,STK4,MIR15A,MI…	c5_GO.Biological.Process	2.20811e-05	0.00613297	0.57561	0.19579	1.49089	981	RBX1,MAP2K7,GABARAP,DVL2,PHF23,PSMC3,CCND1,PRMT1,DLG3,MAP3K11,GSK3A,OAZ1,INHBA,UHRF1,UBE2L3,CACUL1,PRKAG1,RPS6KB2,TBK1,BAD,USP5,GOLGA2,FZR1,NIBAN1,SMAD7,DDX3X,ADNP,LAT,HCLS1,CARD9,SAMD4A,GSN,TMEM259,RNFT1,RPS6KB1,BRCA1,ZFAND2A,CTSK,ARNT,CHFR,DDA1,CSDE1,SUMO2,CIRBP,RBM4,TRIB3,GAS6,CLN3,PRDM12,CREBL2,IL11,HAX1,DOK7,BAX,LDB1,ABCG1,GGA3,HTRA2,LRP1,TGFB1,CAV1,BAZ1B,CSNK1A1,MARCHF7,PDGFC,NHLRC1,RAMP1,R…	c5_GO.Biological.Process
GOBP_SKELETAL_SYSTEM_MORPHOGENESIS	5.38208e-06	0.000892255	0.610527	0.354576	1.89708	166	FOSL2,TSKU,HOXA1,SGPL1,BMP4,HOXB6,HOXB7,HOXB8,HOXB9,NPR2,TFAP2A,HOXA9,HOXA11,HOXA3,HOXA7,HAS2,SMAD3,HOXA4,HOXA5,BMPR1B,HOXA2,ZFAND5,RARA,CITED2,CYP26B1,BMP6,SOX6,ACVR2B,IFT140,SATB2,SOX9,GRHL2,DHRS3,OSR2,HOXB3,HOXB5,HOXC9,HOXC4,HOXC8,NDST1,DYNC2I1,MSX1,ZEB1,RFLNA,ARID5B,HOXC11,HOXB4,BMPR2,RUNX2,RARG,PDGFRA,EXT1,NOG,THBS3,FGFR2,CHSY1,LAMA5,RDH10,IFT80,TGFBR1,SMAD2,TIPARP,MMP2,NIPBL,NAB2	c5_GO.Biological.Process	8.53596e-05	0.0116663	0.538434	0.297268	1.86558	172	BMPR1B,TFAP2A,HOXB6,HOXB7,HOXB8,HOXB9,NPR2,COL27A1,ARID5B,FOXC2,MMP2,ANKRD11,HOXA3,HOXA5,HOXA4,HOXA7,ACVR2B,HOXD3,HOXD4,RARB,HOXC11,HOXA1,RARG,SIX4,GRHL2,PEX7,RDH10,HOXC9,BMP4,RAB33B,SLC39A1,HOXC4,HOXC8,SOX6,BMP1,TBX1,ZEB1,HOXA9,HOXA11,INPPL1,GLG1,MED12,TMEM107,NKX3-2,FOXC1,LRP5,MAPK14,TGFBR2,HOXD10,SP5,FUZ,DLG1,MATN1,HOXB3,HOXB4,HOXB5,MEGF8,BMP7,NPPC,HOXB2,FGFR2,THBS3,FGFR3,COMP,BMPR2,MSX1,TSKU,…	c5_GO.Biological.Process
Wnt signaling pathway; datasource: panther;	6.91977e-06	0.0099714	0.610527	0.361262	1.93358	171	TBL1XR1,PLCB3,TLE6,GNG8,SMARCD2,CTBP1,PRKCH,WNT5B,CDH16,BMPR1B,CDHR2,WNT10A,FAT3,FZD2,CELSR2,PRKCD,DVL1,PYGO2,KREMEN2,NFATC2,WNT7B,WNT9A,ARID1A,PPP3CA,CTNNA1,ITPR3,TLE1,TLE3,PRKCZ,GNB1,DACT1,SMARCC1,CDH15,SRCAP,KREMEN1,PRKCG,NFATC1,PRKCA,PRKCE,ACVR1B,GNG7,PPP2R5D,ITPR2,HDAC2,WNT11,CTNNAL1,SMARCC2,TGFBR1,GNB2,PLCB2,CSNK1E,GNG3,TCF7L2,PRKCI,EP300,PCDHGA12,PCDHGC3,PCDHGC5,PCDHGC4,PCDHGB7,PCDHGB6,PCD…	PathwayCommons11	0.0293164	0.572801	0.352488	0.231712	1.43518	176	DVL2,CDH24,GNG7,GNG12,PLCB3,PYGO2,CSNK2A3,BMPR1B,NFATC3,CTNNA1,CTBP1,CSNK1A1,WNT7B,FZD1,PRKCE,PPP2R5B,CSNK1E,CSNK2A2,CDH3,CDH16,WNT5B,CTBP2,HDAC8,WNT10A,GNB2,CELSR2,WNT2B,GNG3,FZD2,CREBBP,ITPR2,SMARCE1,CELSR1,PRKCD,FZD4,WNT11,CDH1,WNT4,LRP5,SMAD1,SMARCD2,CELSR3,SMARCA2,EP300,CSNK1G2,HDAC2	PathwayCommons11
GOBP_NEGATIVE_REGULATION_OF_CELL_DIFFERENTIATION	7.1051e-06	0.00115284	0.610527	0.27344	1.66353	481	GPR137,MEN1,TSKU,EGFR,LYN,FSTL3,NFE2L2,ID2,SMAD7,ZFP36L2,EFNA1,SEMA4B,BMP4,HOXB8,DKK1,ACTB,NPR2,NR1D1,HOXA9,BCL6,JAG1,SKIL,HOOK3,HOXA7,BICRAL,SEMA3B,NF2,SMAD3,HOXA5,TGFB1I1,HOXA2,TGFB1,RTN4R,SPAG9,RARA,DAB2IP,ABCA5,BHLHE41,SOX6,NRARP,PRICKLE1,TP63,SHB,NBR1,GABPA,YTHDF2,ULK1,MIR29B1,SOX9,TRIB3,RUNX1,MIR26A1,MYC,GRHL2,NFATC2,NFKBIA,TP53INP1,KRAS,LSM1,FLCN,WNT9A,NKX2-1,FOXJ1,SOD2,PPP3CA,CTNNA1,RGS2,…	c5_GO.Biological.Process	0.0409573	0.359241	0.321776	0.178092	1.27634	493	CCND1,PRMT1,PRMT5,GSK3A,INHBA,SPRY1,NOTCH3,GPR137,MIR149,SMAD7,ZFP36,ZBTB7B,NBR1,HOXB8,PPARA,TRIB3,NFATC3,NPR2,CTNNA1,LDB1,SOD2,ABCG1,LOXL3,AKIRIN1,HOXA5,HOXA7,MAG,ABCA1,TGFB1,CAV1,TBX6,HDAC7,NOTCH1,ZHX2,SRSF6,DNAJB11,PTCH1,SDHAF2,MYC,ACTB,BCL11A,ZBED6,BMAL1,EPHA4,BICRAL,IL17RD,RARB,NR1H3,MEN1,TENT5C,BICRA,DPF2,CITED1,RARG,PCM1,XBP1,MDK,JAK3,SIX4,EXTL3,SOX2,EFNB3,TP53,ZFPM1,GRHL2,EFNA1,OVOL2,N4BP…	c5_GO.Biological.Process
GOBP_REGULATION_OF_IMMUNE_SYSTEM_PROCESS	7.53758e-06	0.00118237	0.610527	0.235167	1.50745	954	BAD,GPR137,AXL,TNFRSF18,CD247,HEXIM1,SMARCD2,FOSL2,TRAFD1,MYO18A,PIK3CD,CACTIN,HAMP,LYN,FSTL3,SPON2,NFE2L2,ID2,SMAD7,ZFP36L2,PTPN6,CACNB3,FLOT2,BMP4,PRKCH,HOXB8,ZDHHC5,AP3D1,STOML2,RAC3,ACTB,INAVA,ARG2,MAPK10,SH2B2,NR1D1,NOP53,CARD9,HOXA9,BCL6,JAG1,SH2D1A,HOXA7,CLCF1,ZNF16,FUT4,MIR125A,SMAD3,FUT7,HOXA5,SOX12,NLRP1,ZNF131,TGFB1,PTK2,LACC1,ISG15,DHPS,RARA,SOS2,DAB2IP,CYP26B1,RPS6KA3,STK11,SHLD1,KLR…	c5_GO.Biological.Process	4.5107e-05	0.0083954	0.557332	0.192007	1.45823	957	MAP2K7,AXL,PHPT1,PRMT1,IRF3,SERPINB9,TMBIM6,BLOC1S3,MARK4,PKN1,TNFSF13,CD68,ACIN1,PTPN6,SPPL2B,ISG15,KARS1,INHBA,MKRN2,TBK1,BAD,GPR137,MIR149,LACC1,SMAD7,TRIM41,ZFP36,DDX3X,ZBTB7B,LAT,HCLS1,CARD9,CEBPB,CD320,ARNT,HOXB8,BRPF1,ZNF580,RBM14,LGR4,GAS6,MERTK,FUT7,HAX1,NECTIN2,HEXIM1,BAX,LDB1,SPON2,NAGLU,LOXL3,RCOR1,AKIRIN1,HOXA5,HOXA7,SPHK2,SPG21,STAT6,KAT2A,TGFB1,TNFSF9,CAV1,C17orf99,TNFRSF13C,CSNK1A…	c5_GO.Biological.Process
GOBP_MONONUCLEAR_CELL_DIFFERENTIATION	7.59721e-06	0.00118237	0.610527	0.299333	1.73677	321	BAD,AXL,LTBR,MEN1,SMARCD2,FOSL2,PIK3CD,LYN,ID2,SMAD7,ZFP36L2,PTPN6,BMP4,AP3D1,ACTB,IL11,EGR1,SYVN1,BCL6,HOXA7,CLCF1,FUT7,CSF2,SOX12,ITGB6,TGFB1,IRF2BP2,RARA,SOS2,CYP26B1,JAK1,STK11,NRARP,SHB,CEBPB,RHOH,ABL1,KMT2A,ZBTB7A,AIRE,RUNX1,STAT6,MYC,CD27,JAG2,JUNB,ARID1B,FOXJ1,NFKBIZ,ARID1A,SOX13,SPI1,FOXP1,NCKAP1L,BAX,FOXP3,IL4I1,PRKCZ,BAK1,ZEB1,DNAJB9,CSF1,ZBTB7B,TP53,ZFP36L1,TNFSF4,KAT5,IL1B,FOS,SMARCC…	c5_GO.Biological.Process	0.0173869	0.247719	0.352488	0.195642	1.33649	324	AXL,RELB,ZBTB7A,ACIN1,PTPN6,INHBA,BAD,JAG2,SMAD7,ZBTB7B,FASN,CEBPB,TCIRG1,CTSK,GAS6,MERTK,FUT7,IL11,BAX,LOXL3,HOXA7,CEBPG,STAT6,KAT2A,TGFB1,TNFSF9,C17orf99,CD4,MYC,ACTB,AP3D1,MEN1,ABL1,PIK3R2,BATF3,CARD11,XBP1,VAV1,MDK,JAK3,LYL1,TP53,ZFPM1,LMBR1L,NCKAP1L,FCER1G,JMJD6,RASGRP1,NCAPH2,TYRO3,BMP4,SMARCE1,MED1,FNIP1,RNF41,NFKBID,ADGRG3,ZEB1,FOS,PKNOX1,AMBRA1,STK11,IRF2BP2,WNT4,SOCS1,XRCC6,STAT5B,SMARC…	c5_GO.Biological.Process
GOBP_ANATOMICAL_STRUCTURE_FORMATION_INVOLVED_IN_MORPHOGENESIS	8.93248e-06	0.00136238	0.593325	0.240933	1.53267	833	PHLDB1,MMRN2,PLCD3,EDAR,ADM,CAPN2,IFT122,PTPN18,EHD1,ATP5F1B,HOXA1,ADM2,PIK3CD,CEMIP2,PLXNB2,PLEC,NFE2L2,SP1,PTK7,EFNA1,ERCC1,TNNT2,MIR200C,PTPN6,ANXA2,BMP4,CAPN3,BTG1,KRT8,MIR196A1,DKK1,TNFAIP2,NPR2,TFAP2A,HMGA2,CYP1B1,EHD2,HOXA11,BCL6,JAG1,PDGFA,SKIL,HOXA3,HOXA7,DDAH1,MIRLET7F1,NF2,MIR125A,MIR99B,PML,SMAD3,ABCA2,HSPG2,HOXA5,LMO4,ITGB6,SLC9A8,NOX5,TGFB1,PTK2,WDR74,MCAM,STK4,GTF2I,RARA,CITED2,TSP…	c5_GO.Biological.Process	5.04552e-05	0.00855608	0.557332	0.198416	1.49316	848	DVL2,KDM6B,FMNL3,EHD1,PKN1,PTK7,PAFAH1B1,MIR200C,PTPN6,ADM2,INHBA,MYMX,SPRY1,NOTCH3,CLUAP1,GPC1,MIR149,SHC1,CECR2,TCIRG1,BRCA1,MIR497,TPPP,TFAP2A,MIR196A1,PAX2,PPARA,OBSCN,AMOTL2,ADGRB2,NPR2,COL27A1,NECTIN2,LDB1,MACROH2A1,FOXC2,MMP2,HOXA3,HOXA5,HOXA7,MAG,KAT2A,TGFB1,ACVR2B,CAV1,KRT19,TBX6,HDAC7,NOTCH1,ITGB2,RAMP1,SOX18,MCAM,ZNF385A,PRKD2,PTCH1,ITGB4,FZD1,MIR15A,MIR16-1,MIR10B,PLXNB2,WNK1,ANG,POGL…	c5_GO.Biological.Process
GOBP_EPIDERMIS_DEVELOPMENT	9.21008e-06	0.00137718	0.593325	0.319757	1.80566	240	CYP27B1,EDAR,FOSL2,EGFR,LSR,PLEC,KEAP1,GLI1,FLOT2,BMP4,PRKCH,DKK1,CST6,MET,JAG1,PDGFA,HOXA7,HOXC13,ETV4,WNT10A,VDR,STK4,CYP26B1,MACROH2A1,FOXE1,TP63,ELOVL1,SOX9,KRT7,KRT86,CFLAR,GRHL3,RELA,GRHL2,JAG2,SHARPIN,SFN,NFKBIZ,PPP3CA,NGFR,TPRN,ERCC2,SOSTDC1,PLOD3,ESRP1,EVPL,GORAB,NCOA3,ZFP36L1,NME2,SEC24B,KRT17,EXT1,FOXN1,LAMB3,SRF,KRT15,NTF4,ASAH1,WDPCP,MYCL,FGFR2,MYO6,GSDME,PTCH1,EXTL3,WHRN,LGR4,TRIOBP…	c5_GO.Biological.Process	0.00030813	0.0264196	0.498493	0.25491	1.68784	255	ALOX12B,ETV4,PAFAH1B1,OVOL1,INHBA,KAZN,JAG2,ZFP36,MAFG,TPRN,ALOX12,ESRP1,PPARA,LGR4,LDB1,MACROH2A1,NAGLU,HOXA7,HOXC13,KRT15,NOTCH1,SOX18,SRSF6,PTCH1,ATP2A2,CDH3,FOXE1,POU4F3,SOX21,ELOVL1,WNT10A,IRF6,CASP3,EXTL3,LSR,GRHL2,OVOL2,AGPAT2,BMP4,WAS,MED1,SULT2B1,NTF4,TRIOBP,MANSC4,SHARPIN,ATP2C1,NF1,RELA,ACER1,PALLD,CD109,FLOT2,SMO,FOXC1,TRADD,EPHA2,FOXI3,ERCC2,PIAS4,NGFR,FUZ,ERRFI1,KRTDAP,SCRIB,HDAC2,C…	c5_GO.Biological.Process
GOBP_EMBRYONIC_SKELETAL_SYSTEM_MORPHOGENESIS	9.78036e-06	0.00143433	0.593325	0.443381	2.08816	79	HOXA1,BMP4,HOXB6,HOXB7,HOXB8,HOXB9,TFAP2A,HOXA9,HOXA11,HOXA3,HOXA7,SMAD3,HOXA4,HOXA5,HOXA2,IFT140,SATB2,GRHL2,OSR2,HOXB3,HOXB5,HOXC9,HOXC4,NDST1,DYNC2I1,ZEB1,HOXC11,HOXB4,RUNX2,PDGFRA,NOG,FGFR2	c5_GO.Biological.Process	3.03412e-06	0.00158969	0.627257	0.426389	2.2416	77	TFAP2A,HOXB6,HOXB7,HOXB8,HOXB9,FOXC2,HOXA3,HOXA5,HOXA4,HOXA7,HOXD3,HOXD4,HOXC11,HOXA1,SIX4,GRHL2,RDH10,HOXC9,BMP4,SLC39A1,HOXC4,TBX1,ZEB1,HOXA9,HOXA11,MED12,TGFBR2,HOXD10,FUZ,DLG1,HOXB3,HOXB4,HOXB5,MEGF8,BMP7,HOXB2,FGFR2	c5_GO.Biological.Process
REACTOME_ESR_MEDIATED_SIGNALING	1.01637e-05	0.0184331	0.593325	0.363408	1.933	155	CTSD,NRIP1,GNG8,EGFR,USF2,GTF2A1,SP1,FOSB,CDKN1B,IGF1R,STAG2,BTC,H2AX,DDX5,MOV10,USF1,PTK2,PTGES3,CXXC5,KDM4B,CAV2,ZNF217,RUNX1,NRAS,MYC,TNRC6A,KRAS,GTF2F1,SHC1,TLE3,PRKCZ,SPHK1,JUN,GNB1,CCND1,NCOA3,POLR2B,KAT5,FOS,RAD21,H3-3B,PPP5C,POU2F1,AKT2,SRF,NCOA2,GNB5,MAPK3,SMC1A,GNG7,PIK3R3,PDPK1,TNRC6C,CARM1,GNB2,MMP2,GNG3,JUND,EP300,PRMT1,FOXA1,ZDHHC7,MED1,PIK3R2,HSP90AA1,CREB1	c2_curated.Canonical.Pathways	1.19591e-05	0.000741663	0.593325	-0.296574	-1.90605	190	EGFR,H4C8,H3C3,H2BC3,H2BC4,H2AC6,H4C2,H2BC11,H4C3,PIK3R3,H4C5,CHD1,H3C4,H2BC7,H2AC7,BCL2,H4C13,H3C11,H4C1,H3C1,ESR2,H2BC13,H3C10,H2BC14,H2AC14,IGF1R,POLR2B,H2BC12,H3C2,H2AC4,H2BC9,H3C7,H3C8,H2BC10,KCTD6,NCOA2,H2AC20,ZDHHC7,FOXO3,H3C6,GNAI3,PIK3CA,MYB,H2BC17,H3C12,H4C16,H2BC15,FKBP5,POLR2I,NR5A2	c2_curated.Canonical.Pathways
Epigenetic.Modification	1.05117e-05	0.000304838	0.593325	0.386335	1.95866	122	TBL1XR1,MEN1,TRAF1,MECOM,ID2,SP1,CDKN1B,ACTB,IGF1R,HMGA2,HOXA9,HOXA10,HOXA11,BCL6,MET,PDGFA,PML,CSF2,H2AX,ETV4,CEBPB,RUNX1,RELA,MYC,ARID1B,MDM2,ETV7,NFKBIZ,ARID1A,NGFR,BAX,HDAC10,ZEB1,LCOR,KMT2D,EWSR1,TP53,CCND1	NanoString_Genes	0.246602	0.625973	0.119888	0.193756	1.12043	123	CCND1,ETV4,KMT2D,CEBPB,BAX,NSD1,MYC,ACTB,H2AX,MEN1,DDB2,HDAC10,NFKB2,TP53,PBX3,ETV7,CREBBP,RELA,ZEB1,HOXA9,HOXA10,HOXA11,BRD3,BAIAP3,NSD3,TGFBR2,NGFR,EP300,BRD4,EWSR1,HDAC2,GATA2,LCOR,HHEX,NTRK1,CCNA1,TCF3,ATF1,PDGFA,CEBPA,PBRM1	NanoString_Genes
GOBP_POSITIVE_REGULATION_OF_PROTEIN_MODIFICATION_PROCESS	1.11298e-05	0.00159947	0.593325	0.253931	1.57585	585	TNFRSF18,MAP4K2,CHFR,MAPKAP1,PTPA,GABARAP,BAZ2A,EGFR,SAE1,TNFRSF1A,AMER1,LYN,ATG14,EFNA1,BMP4,TRABD2B,CDKN1B,DKK1,CENPX,INAVA,IL11,TRIM65,EGR1,BAZ1B,TRABD2A,NSMF,HMGA2,NOP53,PHF23,PDGFA,FNTA,CLCF1,PML,RALB,CSF2,TAOK2,ERBB3,CAPRIN2,TGFB1,NOS1AP,PTK2,TESK1,STK4,DAB2IP,BMP6,STK11,MOB3A,FGF5,CLN3,PRICKLE1,PDCD6,BRCA1,LRRK1,PRKCD,ATP2B4,ABL1,POMT2,UBE2V1,SOX9,TRIB3,UBE2K,EHD4,PTTG1IP,DVL1,DOK7,BRMS1,T…	c5_GO.Biological.Process	0.000166002	0.0175939	0.518848	0.209809	1.52695	589	RBX1,MAP2K7,GABARAP,DVL2,PHF23,CCND1,DLG3,MAP3K11,GSK3A,INHBA,UBE2L3,CACUL1,PRKAG1,TBK1,GOLGA2,FZR1,NIBAN1,DDX3X,ADNP,LAT,HCLS1,BRCA1,ARNT,CHFR,TRIB3,GAS6,CLN3,PRDM12,CREBL2,IL11,HAX1,DOK7,TGFB1,CAV1,BAZ1B,MARCHF7,PDGFC,NHLRC1,RAMP1,CD4,TSPYL5,RPTOR,SPRTN,FZD1,LIF,POMT1,ADCY10,ANG,BMAL1,EPHA4,INAVA,MAP4K2,VEGFB,ABL1,ARHGEF2,PTPA,SNX9,PRR5,LRRK1,HSP90AA1,NTF3,UNC119,MST1R,HSP90AB1,PILRB,MIR34A,RAD…	c5_GO.Biological.Process
GOBP_HOMEOSTATIC_PROCESS	1.13259e-05	0.00159947	0.593325	0.225087	1.46316	1155	TBL1XR1,CYP27B1,BAD,PLCB3,GPR137,AXL,SCNN1A,MBP,TMEM9,ZG16B,FOSL2,EHD1,ATP5F1B,TSKU,FBXL5,PIK3CD,GLRX3,LSR,HAMP,USF2,SLC1A5,NOL3,LYN,SLC12A9,MAEA,FTH1,NFE2L2,ID2,PPP1R13L,PTPN6,BMP4,PWWP2B,CAPN3,SLC34A3,HOXB6,LCN2,STOML2,RAC3,TM6SF2,ACTB,INAVA,OXT,EGR1,IGF1R,TULP1,SH2B2,NR1D1,SCARB1,CARD9,BCL6,NT5E,MED13,SKIL,RMI1,ZNF16,PIWIL4,HAS2,PML,ABCA2,HOXA5,TNS2,FOXK2,ITGB6,SLC9A8,TMEM165,TPT1,ACOX1,F11R,U…	c5_GO.Biological.Process	0.00092096	0.0524466	0.477271	0.176444	1.36616	1163	SLC1A5,LRRC8E,MCL1,AXL,KDM6B,DMPK,ZBTB7A,PRMT1,TMBIM6,EHD1,NKIRAS2,PKN1,COX19,ACIN1,NXNL1,DEDD2,PTPN6,JSRP1,SLC2A1,ISG15,INHBA,SLC29A1,ACOX1,JPH4,SLC25A23,BAD,PLCB3,GPR137,LACC1,SLC9A5,ATP6V0C,ZFP36,DDX3X,ADNP,ACHE,ZBTB7B,LAT,SPNS1,HCLS1,CARD9,CEBPB,TMEM203,CHERP,TCIRG1,RNASEK,CTSK,ARNT,SLC25A25,HOXB6,PAX2,RBM4,LGR4,GAS6,ISCU,SART3,ANO1,MERTK,CLN3,UBAP2L,BAX,ATP2A1,LDB1,SOD2,MAEA,ABCA3,ABCG1,FOXC…	c5_GO.Biological.Process
GOBP_EXTRINSIC_APOPTOTIC_SIGNALING_PATHWAY	1.16761e-05	0.00161894	0.593325	0.356182	1.90975	170	BAD,LTBR,TRAF1,GABARAP,TNFRSF1A,NOL3,BMP4,KRT18,KRT8,SKIL,PML,SMAD3,CSF2,ERBB3,BMPR1B,TGFB1,STK4,DAB2IP,FAF1,BRCA1,CFLAR,RELA,CD27,MCL1,BAG3,NFKBIZ,TNFSF12,CTNNA1,TMC8,KITLG,SPI1,BAX,BAK1,RB1CC1,IL1B,CASP8,DDX47,IL6R,HTT,GCLC,MLLT11,THBS1,BCL2L10,CASP10,NRP1,RIPK1,PPP1CA,ACVR1B,SORT1,PDPK1,ATF3,STK3,TGFBR1,ITPRIP,PAK5,CRADD,GSTP1,TCF7L2,RAF1,BCL2L12,PIDD1,IL1A,MKNK2,NF1,YAP1,HIPK1,MIR198,COL2A1,R…	c5_GO.Biological.Process	0.00761126	0.175473	0.407018	0.248799	1.55027	165	MCL1,GABARAP,BCL2L12,GSK3A,DEDD2,INHBA,BAD,RFFL,DDX3X,BMPR1B,RPS6KB1,BRCA1,MKNK2,CTNNA1,BAX,HTRA2,TGFB1,CAV1,GCLC,MADD,PSME3,ARHGEF2,KRT18,KRT8,BCL2L11,BLOC1S2,TNFSF12,ZMYND11,TMBIM1,TNFRSF10A,BMP4,RNF41,DAB2IP,NF1,RELA,CX3CL1,NDUFA13,TNFRSF12A,TRADD,DEDD,MLLT11,GSTP1,PELI3,RAF1	c5_GO.Biological.Process
GOBP_ACTIN_FILAMENT_BASED_PROCESS	1.65897e-05	0.00225916	0.57561	0.258528	1.60047	564	DSTN,CDC42EP3,TLE6,MYO18A,SPTB,PLEC,RHOQ,FRMD3,PTK7,FSCN2,TNNT2,SORBS3,PDLIM2,FGD3,FGD2,CAPN3,KRT8,RAC3,ACTB,TMSB10,SH2B2,EHD2,BCL6,MET,PDGFA,EPS8,NF2,SMAD3,TAOK2,FRMD6,PRICKLE4,CAPZA1,NOS1AP,F11R,TESK1,MKKS,EPB41L1,ESAM,RND2,CACNA1D,TCAP,MICALL2,RAP1GDS1,CLN3,CLASP1,RHOH,PRKCD,CAVIN3,SIPA1L1,ABL1,MRTFA,KPTN,CFLAR,SPTBN5,GRHL3,SNTA1,IKBKB,SLC9A1,CSRP1,CORO1A,NCKAP1,KRAS,BAG4,PTPN1,RHOT2,TNIK,RICT…	c5_GO.Biological.Process	0.000326104	0.0272299	0.498493	0.203858	1.48526	590	PHPT1,CDC42BPG,FMNL3,KPTN,PTK7,PAFAH1B1,FGD1,CAPZA1,MIR149,SHC1,FHOD1,FSCN2,HCLS1,GSN,CORO6,KANK3,RHOV,OBSCN,AMOTL2,GBA2,AVIL,PACSIN2,CLN3,HAX1,CDC42BPA,WASF1,ATP2A1,CDC42EP3,LRP1,F11R,ELN,CAV1,PLEKHG2,KRT19,SVIL,CACNA1D,RHOF,CDC42EP1,FARP2,ATP2A2,ACTB,RANGRF,MICAL3,PIP5K1C,PRKCE,ADCY10,ANG,TMSB15B,PFN1,ABL1,PIK3R2,INSRR,ARHGEF2,STAU2,CNN2,PARVB,PARVG,SNX9,ESPN,SPTBN4,SWAP70,ARPC3,KRT8,SIX4,CAPG,…	c5_GO.Biological.Process
KEGG_CYTOKINE_CYTOKINE_RECEPTOR_INTERACTION	1.67659e-05	0.0184331	0.57561	0.38332	1.94997	118	LTBR,TNFRSF18,EDAR,EGFR,TNFRSF1A,INHBC,INHBE,IL11,MET,PDGFA,CLCF1,CSF2,BMPR1B,CXCR5,TGFB1,ACVR2B,TNFRSF25,CD27,VEGFB,IL11RA,IL1R1,TNFSF13,TNFSF12,KITLG,NGFR,CSF1,CSF3R,IL10RA,TNFSF4,IL1B,CCR10,BMPR2,PDGFRA,EPOR,TNFRSF10D,IL6R,TNFRSF6B,IL15RA,ACVR1B,TNFRSF4,TNFSF8,IL6ST,ACVR2A,IL20RB,TGFBR1,IL1A,LEPR,IL20RA,OSMR,IL5	c2_curated.Canonical.Pathways	0.306613	0.715373	0.107554	0.18666	1.07355	116	TNFSF13,CXCL16,INHBA,BMPR1B,IL11,TGFB1,ACVR2B,TNFSF9,TNFRSF13C,PDGFC,LIF,TNFRSF25,EPOR,VEGFB,TNFSF12,AMH,TNFRSF10A,TNFRSF10D,CX3CL1,TNFRSF12A,TGFBR2,CTF1,NGFR,CSF3R,LTBR,BMP7,CLCF1,PDGFA,IL6ST,TNFRSF1A,ACVR1B,CXCL1,BMPR2,IL20RB,TGFB3,CCR10,CD27,IL22RA1,CCL25,IL17RA,IL6R	c2_curated.Canonical.Pathways
GOBP_CELLULAR_RESPONSE_TO_EXTERNAL_STIMULUS	1.73364e-05	0.00231942	0.57561	0.306348	1.75282	265	GABARAPL2,CYP27B1,BAD,KCNK4,AXL,LTBR,MAPKAP1,GABARAP,SLC38A2,TNFRSF1A,USF2,LYN,PLEC,NFE2L2,ATG14,SP1,TMEM87A,SESN1,NR4A2,IGF1R,RALB,STK24,F11R,USF1,BRIP1,VDR,LAMTOR1,PIEZO1,BMP6,GABARAPL1,ULK1,SOX9,WDR24,MAPK8,YWHAZ,KPTN,SLC9A1,TNRC6A,SREBF1,FLCN,BAG3,MDM2,RICTOR,CPEB4,DSC2,CD68,TSSK1B,BAK1,BGLAP,RXRA,PRKAG1,TP53,WDR59,CNN2,RPTOR,PPP1R9B,KAT5,IL1B,FOS,GAS2L1,BMPR2,CASP8,ARHGAP35,SRF,GCLC,ATF4,ATG…	c5_GO.Biological.Process	0.00688294	0.167386	0.407018	0.22325	1.47744	259	GABARAP,AXL,SIPA1,KPTN,CD68,SLC2A1,PRKAG1,BAD,KCNK4,ADNP,TLE5,RPS6KB1,CLEC16A,CTSK,PPARA,GAS6,MAG,F11R,USF1,CSNK1A1,YWHAZ,PDE2A,GCLC,RNF167,RPTOR,BECN1,CNN2,PRR5,XBP1,WNT2B,STK24,USF2,TP53,HABP4,NPRL3,CREBBP,TNFRSF10A,MED1,FNIP1,SLC39A5,PIEZO1,NONO,ASNS,FOS,FOLR2,ATXN3,GAS2L1,COMT,AMBRA1,WNT11,TSSK6,FLCN,WNT4,HSPA8,UCP2,RIPOR1,FBXO22,RRAGD,KANK2,ULK1,SLC38A2,OGT,MLST8,EP300,MYBBP1A,MFSD2A,BRIP1,D…	c5_GO.Biological.Process
GOBP_POSITIVE_REGULATION_OF_CELL_POPULATION_PROLIFERATION	1.80933e-05	0.00237895	0.57561	0.233367	1.49195	865	BAD,CDC42EP3,METRN,ADM,FOSL2,CLDN7,EHD1,EPS8L2,SEPTIN7,EGFR,PIK3CD,MAZ,PLXNB2,LYN,MTA3,RHOQ,NFE2L2,ID2,SP1,CUL7,PTK7,GLI1,NOP2,MIR141,MIR200C,PTPN6,BMP4,PRKCH,CDKN1B,HAPLN4,ACTB,CAPN1,IL11,EGR1,IGF1R,CUX1,HMGA2,BCL6,ISLR2,PDGFA,SKIL,HOXA3,CLCF1,POLD4,BICRAL,ZNF16,HAS2,EPS8,PML,HSPG2,CSF2,BTC,STK24,ERBB3,CAPRIN2,TGFB1,PTK2,LAMC1,DHPS,RARA,RND2,DAB2IP,ZMYND8,TMEM250,BMP6,ETV5,MIR101-1,MEIS3,STK11,F…	c5_GO.Biological.Process	9.36456e-05	0.0123209	0.538434	0.193883	1.46489	894	DVL2,CCND1,PRMT1,MARK4,EHD1,CAPRIN1,PALM,TNFSF13,CUL7,PTK7,PAFAH1B1,MIR141,MIR200C,PTPN6,METRN,CACUL1,KMT2D,CTC1,STX3,NOTCH3,BAD,FZR1,SHC1,TBC1D24,CEP131,ADNP,HCLS1,CLDN7,CD320,NDUFS4,NOP2,RETREG3,TCIRG1,RPS6KB1,AGRN,ARNT,PAX2,NRAS,ZNF580,GAS6,AVIL,IL11,CDC42EP3,MMP2,ELL3,AKIRIN1,HOXA3,SPHK2,KAT2A,TGFB1,TNFSF9,CCAR1,TNFRSF13C,MARCHF7,MTA3,NOTCH1,PDGFC,CDC42EP1,SRSF6,PRKD2,DOT1L,DHPS,ATXN1L,IST1,M…	c5_GO.Biological.Process
GOBP_REGULATION_OF_BONE_MINERALIZATION	1.90082e-05	0.00245689	0.57561	0.497733	2.1658	52	CYP27B1,BCOR,BMP4,TFAP2A,SMAD3,BMPR1B,ISG15,VDR,BMP6,ACVR2B,NBR1,SOX9,OSR2,SLC20A2,BGLAP,ECM1,RFLNA,RXRA,BMPR2,ANO6,TRPM4,S1PR1,ACVR2A	c5_GO.Biological.Process	0.030833	0.311985	0.352488	0.318364	1.54298	52	ISG15,BMPR1B,NBR1,TFAP2A,ACVR2B,BMP4,WNT4,MATN1,FZD9,CYP27B1,BMP7,S1PR1,HIF1A,NOTUM,ADGRV1,COMP,BMPR2,VDR,LTBP3,TRPM4,MIR208A,ATRAID,OSR2,SLC20A2	c5_GO.Biological.Process
GOBP_POSITIVE_REGULATION_OF_EPITHELIAL_CELL_PROLIFERATION	1.9492e-05	0.00247744	0.57561	0.363205	1.90644	146	BAD,EGFR,PIK3CD,MTA3,SP1,BMP4,POLD4,HAS2,HSPG2,LAMC1,BMP6,MIR101-1,NRARP,TP63,PDCD6,C5AR1,MIR29A,SOX9,CAV2,CFLAR,NRAS,MYC,B4GALT1,VEGFB,OSR2,KDM5B,RICTOR,TNFSF12,NME1,ECM1,PLXNB3,PRKD2,CCND1,RPTOR,ANG,NME2,MIR10A,RUNX2,MDK,MIR27B,NOG,FGFR2,NRP1,PRKCA,FGF2,PDPK1,TGFBR1,NOTCH1,ZNF580,CDC42,DLX6,ESRP2,TCF7L2,MIR126,EGFL7,PDCL3,NR4A1,MED1,TBX1,NF1,YAP1,WNT3A,MIR135B,JAML	c5_GO.Biological.Process	0.133208	0.560279	0.165657	0.198426	1.21548	151	CCND1,BAD,ARNT,PAX2,NRAS,ZNF580,MTA3,NOTCH1,SRSF6,PRKD2,MYC,RPTOR,MIR10B,ANG,VEGFB,CDH3,XBP1,MDK,TNFSF12,MYDGF,BMP4,MED1,LAMC1,PGF,JCAD,NF1,ZNF703,TBX1,CDC42,SMO,MIR29A,STAT5A,CAV2,KDM5B,GATA2,MIR10A,FGF2,ADAM17,NKX2-5,MIR126,EGFL7,POLD4,PDCD6,HIF1A,HMOX1,FGFR2,BTK	c5_GO.Biological.Process
GOBP_CELL_CELL_SIGNALING	2.00597e-05	0.0025078	0.57561	0.227034	1.46657	1060	TBL1XR1,BAD,SYT7,TLE6,SLC16A2,MBP,TMEM9,SNAP23,DLGAP1,KCMF1,GABARAP,CTDNEP1,SLC38A2,TSKU,EGFR,PRRT2,AMER1,ACSL4,PNKD,LYN,TMEM237,PTK7,GLI1,EFNA1,CACNB3,BMP4,WNT5B,TRABD2B,DKK1,RAC3,HAPLN4,NR4A2,IL11,EGR1,CLSTN1,NPR2,BCL9L,TRABD2A,DGKE,NSMF,NR1D1,HMGA2,CPT1A,CHD8,PDGFA,SH2D1A,RAB1A,SEMA3B,STAC3,SMAD3,HOXA5,DYSF,ITGB6,TGFB1I1,CAPRIN2,GRIN2D,WNT10A,SPIN1,TGFB1,CYP46A1,STK4,RARA,RNF213,DAB2IP,CACNA1D…	c5_GO.Biological.Process	5.2913e-05	0.00873073	0.557332	0.18798	1.44551	1079	RBX1,GABARAP,DVL2,CCND1,LIN7B,PPFIA3,TMEM88,DMPK,NR3C1,DLG3,RUVBL2,PTK7,NAPA,PAFAH1B1,GSK3A,INHBA,SLC29A1,STX3,JPH4,BAD,CBY1,PYGO2,ATP6V0C,TBC1D24,DDX3X,ADNP,ACHE,TLE5,CTDNEP1,NUDT3,TCIRG1,RPS6KB1,AGRN,MIDN,RBM4,GPR176,LGR4,AMOTL2,NPR2,ANO1,MERTK,PACSIN2,CLN3,IL11,LDB1,HTR1D,PRKAR1B,HOXA5,TMEM9,LRP1,FBXW4,KAT2A,ABCA1,TGFB1,ACVR2B,DGKE,SEPTIN5,TNFSF9,CAV1,VPS18,CSNK1A1,NOTCH1,ITGB2,USP47,CNP,NPTX1…	c5_GO.Biological.Process
GOBP_RESPONSE_TO_HORMONE	2.05589e-05	0.00252875	0.57561	0.248725	1.54417	589	CYP27B1,TIMP2,SCNN1A,CTSD,ZNF106,ADM,NCOA6,FOSL2,LYN,RHOQ,NFE2L2,SP1,ZFP36L2,TFAP4,FOSB,CDKN1B,NR4A2,UFM1,EGR1,IGF1R,NPR2,SH2B2,NSMF,NR1D1,CYP1B1,CARD9,HOXA10,HOXA11,ABCA2,FUT7,TNS2,DDX5,TGFB1,USF1,PTK2,MKKS,BRIP1,MBD5,RARA,SOS2,CITED2,PMEPA1,BMP6,JAK1,STK11,RAP1GDS1,PTGES3,PAQR7,LTA4H,TP63,BRCA1,PRKCD,SLC27A4,ESRRA,NR3C1,PKM,CAV2,TRIB3,PAPPA,THRB,CFLAR,ZBTB7A,KHK,SOCS2,STAT6,RELA,NEDD4,SLC9A1,SR…	c5_GO.Biological.Process	0.046589	0.386016	0.271289	0.167995	1.22966	613	CCND1,NR3C1,ZBTB7A,SERPINB9,PKN1,GSK3A,SLC2A1,INHBA,UBE2L3,KMT2D,SHC1,ZFP36,ZBTB7B,HCLS1,CARD9,RPS6KB1,BRCA1,MIR195,CTSK,PPARA,RBM4,RBM14,TRIB3,NPR2,FUT7,CTNNA1,AGTRAP,ABCA3,FOXC2,MMP2,STAT6,TGFB1,USF1,CAV1,VPS18,KRT19,NOTCH1,LANCL2,RAMP1,STC2,SRSF6,GNRHR2,ZNF592,EIF6,PAQR7,GCLC,WNT7B,FOSB,PRKCE,KBTBD2,A2M,NOS2,ANG,BMAL1,RARB,BSG,UBR5,NR1H3,PIK3R2,INSRR,PTGDS,PRCP,SCAP,AGRP,ATP5F1A,CITED1,HSP90AA…	c5_GO.Biological.Process
GOBP_REGULATION_OF_CELLULAR_RESPONSE_TO_STRESS	2.27075e-05	0.00274869	0.57561	0.256447	1.5759	541	BAD,LTBR,EDAR,FBLN5,MEN1,MAP4K2,MAPKAP1,SMARCD2,SLC38A2,EGFR,MECOM,NOL3,LYN,NFE2L2,ERCC1,BMP4,SMCHD1,ACTB,INAVA,IGF1R,SYVN1,PNKP,HMGA2,CARD9,SKIL,RAD9A,HNRNPK,DDAH1,TMEM259,PML,TAOK2,H2AX,RECQL5,STK24,DDX5,TPT1,RTN4R,HAPSTR1,NUDT16L1,HDGFL2,DAB2IP,AIDA,SHLD1,RPL26,AUNIP,CLN3,SLC25A23,BRCA1,NBR1,KMT5B,ABL1,ATXN7L3,NACC2,UBE2V1,HIC1,LRIG2,PTTG1IP,TAF6,KMT5C,TRAF4,MYC,CD27,WNT7B,YBX3,RACK1,UIMC1,PTP…	c5_GO.Biological.Process	0.0593081	0.407363	0.237794	0.16718	1.21306	545	MAP2K7,PRMT1,TMBIM6,RUVBL2,MAP3K11,DNAJC7,ERCC4,SENP3,ATXN7L3,PAFAH1B1,TERF2IP,SLC25A23,BAD,TBC1D24,UBXN1,SIRT7,ZBTB7B,CARD9,TMEM259,RNFT1,NBR1,BRCA1,OGG1,USP19,CLN3,BAX,ELL3,INO80B,CEBPG,KAT2A,CAV1,MARCHF7,USP47,ZNF385A,PPP4R2,RNF168,HELQ,AUNIP,DPF1,MYC,ACTB,WNT7B,QARS1,POLH,UBQLN4,H2AX,EPHA4,INAVA,NR1H3,MEN1,MAP4K2,ABL1,RFWD3,ARHGEF2,XRCC1,DPF2,ABCA7,DUSP1,HDAC10,HDGFL2,XBP1,BCL2L11,PPP4C,STK24…	c5_GO.Biological.Process
WP_PI3K_AKT_SIGNALING_PATHWAY	2.30521e-05	0.0184331	0.57561	0.322841	1.80348	217	BAD,GNG8,EGFR,PIK3CD,EFNA1,CDKN1B,IGF1R,MET,PDGFA,COL9A2,ITGB6,PTK2,LAMC1,SOS2,JAK1,STK11,FGF5,BRCA1,NRAS,RELA,IKBKB,MYC,MCL1,ADAMTSL4-AS1,KRAS,VEGFB,MDM2,PKN2,RBL2,KITLG,NGFR,GNB1,IRS1,CSF1,CSF3R,PHLPP1,TP53,CCND1,ITGB5,RPTOR,FGF17,COL9A3,PDGFRA,EPOR,AKT2,LAMB3,IL6R,ITGA1,THBS3,THBS1,NTF4,ATF4,GNB5,FGFR2,NTRK1,MAPK3,PRKCA,CCND2,LAMC3,F2R,GNG7,PPP2R5D,PIK3R3,FGF2,LAMC2,PDPK1,LPAR1,SYK,LAMA5,HSP90…	c2_curated.Canonical.Pathways	0.00119902	0.0433427	0.45506	0.251853	1.62294	232	MCL1,ADAMTSL4-AS1,CCND1,GYS1,PKN1,GNG7,RPS6KB2,GYS2,GNG12,BAD,RPS6KB1,BRCA1,NRAS,LAMB2,EIF4B,PDGFC,SGK2,ITGA10,ITGB4,CREB5,MYC,RPTOR,PPP2R5B,EPOR,CDK2,VEGFB,PIK3R2,HSP90AA1,RBL2,NTF3,GNB2,BCL2L11,JAK3,HSP90AB1,FGFR4,TP53,CDC37,EFNA1,GNG3,EFNA4,PPP2R2D,FGF21,EIF4EBP1,LPAR2,AKT2,NTF4,LAMC1,PGF,RELA,CHRM1,ITGA2B,STK11,EPHA2,NGFR,MLST8,RAF1,PHLPP2,CSF3R,ITGA3,ITGB8,TSC1,FGF2,PPP2CA,FGF19,NTRK1,GNG10,…	c2_curated.Canonical.Pathways
GOBP_T_CELL_DIFFERENTIATION	2.31601e-05	0.00275967	0.57561	0.327306	1.81978	212	BAD,MEN1,SMARCD2,FOSL2,PIK3CD,SMAD7,ZFP36L2,BMP4,AP3D1,ACTB,EGR1,BCL6,FUT7,SOX12,TGFB1,RARA,SOS2,CYP26B1,JAK1,STK11,NRARP,SHB,RHOH,ABL1,KMT2A,AIRE,RUNX1,STAT6,CD27,JAG2,JUNB,ARID1B,FOXJ1,NFKBIZ,ARID1A,SOX13,SPI1,FOXP1,NCKAP1L,FOXP3,IL4I1,PRKCZ,ZEB1,ZBTB7B,TP53,ZFP36L1,TNFSF4,KAT5,IL1B,SMARCC1,ARID2,RUNX2,PKNOX1,MDK,TCF7,FOXN1,IL6R,SRF,LAG3	c5_GO.Biological.Process	0.282276	0.696273	0.118815	-0.16412	-1.07533	220	LAG3,FADD,PIK3R3,RPS6,BCL6,BCL2,RUNX2,FOSL2,RABL3,ZMIZ1,FOXP3,SOX13,IRF1,LEF1,PRR7,MIR21,CDK6,KLHL25,RSAD2,IL18R1,ARID1B,IL18,MIR30B,ATP7A,LIPA,GLI3,FOXO3,ARID1A,SOS1,MYB,IL7,DROSHA	c5_GO.Biological.Process
WP_MYOMETRIAL_RELAXATION_AND_CONTRACTION_PATHWAYS	2.43567e-05	0.0184331	0.57561	0.392155	1.97186	111	PLCB3,ADM,GNG8,SP1,CACNB3,PRKCH,ACTB,OXT,RGS20,GABPA,PRKCD,GNAS,YWHAZ,IGFBP4,GRK6,SFN,ADCY9,RGS6,RGS19,ITPR3,RGS2,ATF5,PRKCZ,JUN,GNB1,PRKAR1A,RGS9,CNN2,IL1B,FOS,CALM3,ATP2A3,DGKZ,GRK4,ATF4,ADCY7,GNB5,PRKCG,PRKCA,YWHAG,PRKCE,GNG7,ITPR2,YWHAQ,LPAR1,ATF3	c2_curated.Canonical.Pathways	0.626719	0.868073	0.0667426	0.159565	0.909946	111	GNG7,GNG12,PLCB3,ADCY3,PRKAR1B,RAMP1,YWHAZ,ATP2A2,ACTB,PRKCE,CNN2,GNB2,DGKZ,ADCY5,GNAS,GNG3,CAMK2G,ITPR2,ADCY7,FOS,PRKCD,ADCY6,GABPB1	c2_curated.Canonical.Pathways
GOBP_REGULATION_OF_LEUKOCYTE_DIFFERENTIATION	2.48069e-05	0.00291043	0.57561	0.327324	1.81547	208	BAD,GPR137,AXL,SMARCD2,LYN,FSTL3,ID2,SMAD7,ZFP36L2,PTPN6,BMP4,AP3D1,ACTB,BCL6,HOXA7,SOX12,TGFB1,RARA,SOS2,CYP26B1,NRARP,SHB,CEBPB,RHOH,ABL1,RUNX1,MYC,CD27,JUNB,ARID1B,FOXJ1,NFKBIZ,ARID1A,PPP3CA,KITLG,SOX13,SPI1,FOXP1,NCKAP1L,FOXP3,IL4I1,PRKCZ,ZEB1,BGLAP,CSF1,ZBTB7B,ZFP36L1,RPTOR,TNFSF4,KAT5,FOS,SMARCC1,ARID2,CASP8,MDK,TCF7,FOXN1,LAG3,HCLS1,RIPK1,PRKCA,ZBTB46,IL15RA,TOX,PCID2,CUL4A,SYK	c5_GO.Biological.Process	0.0278952	0.297302	0.352488	0.216961	1.3993	214	AXL,ACIN1,PTPN6,INHBA,BAD,GPR137,SMAD7,ZBTB7B,HCLS1,CEBPB,GAS6,HAX1,LOXL3,HOXA7,KAT2A,TGFB1,TNFSF9,CD4,MYC,ACTB,RPTOR,LIF,AP3D1,ABL1,CARD11,XBP1,MDK,JAK3,ZFPM1,NCKAP1L,RASGRP1,BMP4,SMARCE1,RNF41,NEDD9,NF1,TYROBP,NFKBID,FSTL3,ZEB1,FOS,AMBRA1,SOCS1,XRCC6,STAT5B,SMARCD2,TGFBR2,ACTL6B,SMARCA2,ZFP36L2,IL34,GATA2,MALT1,BRAF,ADAM8,SHB,PRKCZ,KAT5,CLPTM1,LGALS9,BTK,BTN2A2,PBRM1,FBXW7,PCID2,CUL4A,PRDX2,CBF…	c5_GO.Biological.Process
GOBP_MUSCLE_TISSUE_DEVELOPMENT	2.57107e-05	0.00294565	0.57561	0.3004	1.73956	299	FOSL2,PLEC,ID2,SMAD7,GLI1,PPP1R13L,TNNT2,BMP4,DKK1,EGR1,MYLK,NPR2,BCL9L,STAC3,SMAD3,ERBB3,EFEMP2,DDX5,ZFAND5,TGFB1,RARA,CITED2,CYP26B1,SOX6,TCAP,PRICKLE1,ABL1,SOX9,CAV2,CFLAR,RUNX1,TBX2,SLC9A1,CSRP1,YBX3,VPS54,KRAS,FLCN,DDX17,TNNI3,POPDC3,PPP3CA,MYBPC3,RGS2,FOXP1,MSX1,PKP2,MAPK11,GPCPD1,SRPK3,MYL11,PRKAR1A,FOS,CFL2,EMD,MEIS1,CNTNAP1,ARID2,BMPR2,AKIRIN1,FOXN2,CCNT2,PDGFRA,MIR873,SRF,NDUFV2,MIR24-1…	c5_GO.Biological.Process	0.228571	0.655237	0.119348	0.160996	1.09248	299	KDM6B,PRMT1,GSK3A,GPC1,CBY1,SMAD7,MRTFB,RPS6KB1,MIR195,PPARA,USP19,NPR2,FOXC2,HSD17B1,NAGLU,AKIRIN1,KAT2A,TGFB1,ELN,CAV1,NOTCH1,SVIL,PTCH1,POGLUT1,BMAL1,RARB,ABL1,FKBP1A,MAPK11,SIX4,AKAP13,ZFPM1,TBX2,HEG1,NPRL3,PPP1R13L,CFL2,DSG2,BMP4,MED1,NF1,SOX6,TBX1,FOS,MEIS1,CDC42,SMO,FOXC1,FLCN,DMRTA2,DDX17,STAC3,SMAD1,FBXO22,MAPK14,HOXD10,VPS54,YY1,DLL4,EP300,DLG1,CAV2,ADPRHL1,SOX15,TCAP,TSC1,TNNT2,FGF2,MY…	c5_GO.Biological.Process
Differentiation	2.58126e-05	0.000598853	0.57561	0.344864	1.84204	165	TBL1XR1,EGFR,PIK3CD,LYN,EFNA1,CACNB3,KRT18,ACTB,MET,SMAD3,H2AX,TGFB1,SOS2,CACNA1D,PSMB7,CEBPB,ABL1,MAPK8,KRT7,CACNB4,RUNX1,UBC,NRAS,RELA,MYC,SPRY4,NKX2-1,FOXJ1,GRIN1,GRB7,SHC1,MAPK11,MAPK12,JUN,CSF3R,KMT2D,APH1B,PSMB2,KRT17,PKP3,L1CAM,CACNA1H,AKT2,IL6R,ITGA1,KRT19,NRP1,MAPK3,PRKCA,ACVR1B,PIK3R3,FGF2,HDAC2,CD24,MIA,ACVR2A,SOX2,SMAD2,NOTCH1,PAK5,ELOB,LEFTY1,PSMB10,EP300,FOXA2,PIK3R2,FOXC1,CREB1,COL…	NanoString_Genes	0.0290193	0.27321	0.352488	0.227768	1.40737	168	RBX1,KMT2D,SHC1,CEBPB,NRAS,TGFB1,KRT19,NOTCH1,CACNA1D,PSMB10,MYC,ACTB,H2AX,CDK2,ABL1,PIK3R2,RPL23,MAPK11,MAPK12,KRT18,SOX2,EFNA1,UBC,CREBBP,AKT2,GRB7,RELA,ITGA2B,E2F1,MED12,PTPN11,FOXC1,EPHA2,MAPK14,DSC3,PKP3,EP300,RGMB,CSF3R,HDAC2,GATA2,RET,FGF2,MAPK3,RAC1,PSMB5,ELOB,CACNB4,EFNA3,TCF3,COL4A5,CEBPA,PPL,ITGA5,ACVR1B,PRKX	NanoString_Genes
GOBP_CELL_FATE_COMMITMENT	2.60757e-05	0.00294565	0.57561	0.335767	1.82245	186	CHD3,MTA3,ID2,CHD4,BMP4,WNT5B,DKK1,TEAD3,HOXA11,JAG1,PML,LMO4,FKBP8,TGFB1I1,HOXA2,WNT10A,RARA,CYP26B1,SOX6,JAK1,SOX9,TBX2,STAT6,MCL1,WNT7B,JAG2,MTA1,WNT9A,MTA2,NKX2-1,HOXC10,SOX13,TBX6,FOXP3,SOSTDC1,ESRP1,TP53,CDC73,RUNX2,GSX2,EXT1,FOXN1,IL6R,KDM6B,RAB10,FGFR2,PTCH1,NRP1,NR2F2,TOX,NFIB,CDON,FGF2,HDAC2,WNT11,GATAD2A,PAF1,TBX10,SOX2,TGFBR1,SMAD2,NOTCH1,CDC42,TCF7L2,NOTCH3,FOXA2,FOXG1,FOXA1,TBX1	c5_GO.Biological.Process	0.0126772	0.214829	0.38073	0.234309	1.48905	191	MCL1,KDM6B,MTA2,CHD3,NOTCH3,JAG2,CHD4,FKBP8,PAX2,ESRP1,FOXC2,LOXL3,STAT6,MTA3,TBX6,NOTCH1,LHX3,SOX18,PTCH1,WNT7B,WNT5B,ARHGEF2,WNT10A,CASP3,WNT2B,SOX2,TP53,ZFPM1,DHH,TBX2,FOXA1,BMP4,GATAD2A,HOXC10,SOX6,TBX1,HOXA11,CDC42,WNT11,SMO,DMRTA2,WNT4,FOXI3,SMAD1,HOXD10,DLL4,LMO4,HDAC2,GATA2,APC2,TBX10,FGF2,BRAF,NFIA	c5_GO.Biological.Process
GOBP_EMBRYONIC_ORGAN_DEVELOPMENT	2.6266e-05	0.00294565	0.57561	0.286617	1.67131	332	PLCD3,ADM,IFT122,EGFR,HOXA1,ID2,PTK7,GLI1,EFNA1,PPP1R13L,ERCC1,BMP4,KRT8,HOXB6,HOXB7,HOXB8,HOXB9,TEAD3,TFAP2A,HOXA9,HOXA11,ECE1,PDGFA,HOXA3,HOXA7,SMAD3,HOXA4,HOXA5,CSF2,HOXA2,TGFB1,MKKS,STK4,RARA,CITED2,TCAP,IFT140,FZD2,SATB2,PRICKLE1,FOXE1,SH2B3,CEBPB,ALDH1A3,SOX9,KMT2A,GRHL3,DVL1,TBX2,GRHL2,WNT7B,JUNB,OSR2,HOXB3,HOXB5,HOXC9,HOXC4,NDST1,DYNC2I1,KITLG,TBX6,TPRN,ERCC2,MSX1,ZEB1,POLE,TP53,ZFP36L1,H…	c5_GO.Biological.Process	0.000143151	0.0158317	0.518848	0.242204	1.6729	352	DVL2,PTK7,CLUAP1,ECE1,CEBPB,TPRN,ARNT,TFAP2A,HOXB6,HOXB7,HOXB8,HOXB9,PAX2,COL27A1,CDC40,FOXC2,NAGLU,HOXA3,HOXA5,HOXA4,HOXA7,TGFB1,KRT19,TBX6,NOTCH1,SOX18,PTCH1,WNT7B,LIF,HOXD3,HOXD4,MFAP2,A2M,RARB,HOXC11,MKS1,FOXE1,POU4F3,HOXA1,CITED1,ALDH1A3,RARG,KRT8,SIX4,TRA2B,MKKS,TP53,ZFPM1,GRHL2,TBX2,RDH10,EFNA1,FZD2,PBX3,PPP1R13L,ERCC1,OVOL2,HOXC9,KDM2B,BMP4,MED1,SLC39A1,LRIG1,TRIOBP,HOXC4,TBX1,ZEB1,HOXA9,…	c5_GO.Biological.Process
GOBP_LEUKOCYTE_DIFFERENTIATION	2.74085e-05	0.00302924	0.57561	0.273221	1.63655	407	BAD,GPR137,AXL,LTBR,MEN1,SMARCD2,FOSL2,PIK3CD,LYN,FSTL3,ID2,SMAD7,ZFP36L2,PTPN6,ANXA2,BMP4,AP3D1,ACTB,IL11,EGR1,SYVN1,BCL6,HOXA7,CLCF1,FUT7,CSF2,SOX12,ITGB6,TGFB1,IRF2BP2,RARA,SOS2,CITED2,CYP26B1,JAK1,STK11,NRARP,SHB,CEBPB,RHOH,LRRK1,ABL1,NR3C1,KMT2A,ZBTB7A,AIRE,RUNX1,STAT6,MYC,CD27,JAG2,VPS54,JUNB,ARID1B,FOXJ1,NFKBIZ,ARID1A,PPP3CA,KITLG,SOX13,SPI1,FOXP1,NCKAP1L,BAX,FOXP3,SNX10,IL4I1,PRKCZ,BAK1,Z…	c5_GO.Biological.Process	0.00218001	0.0919096	0.431708	0.211839	1.48692	411	AXL,NR3C1,RELB,ZBTB7A,PAFAH1B1,ACIN1,PTPN6,INHBA,BAD,GPR137,JAG2,SMAD7,ZBTB7B,HCLS1,FASN,CEBPB,TCIRG1,CTSK,GAS6,MERTK,FUT7,IL11,HAX1,BAX,NAGLU,LOXL3,HOXA7,CEBPG,STAT6,KAT2A,TGFB1,TNFSF9,C17orf99,FARP2,CD4,MYC,ACTB,RPTOR,LIF,AP3D1,MEN1,ABL1,PIK3R2,BATF3,CARD11,LRRK1,XBP1,VAV1,MDK,JAK3,LYL1,TP53,ZFPM1,LMBR1L,NCKAP1L,FCER1G,JMJD6,RASGRP1,NCAPH2,TYRO3,BMP4,SMARCE1,MED1,FNIP1,RNF41,NEDD9,JAGN1,RRAS,NF…	c5_GO.Biological.Process
GOBP_GLAND_DEVELOPMENT	2.79531e-05	0.00304529	0.57561	0.294267	1.70751	317	EDAR,NKX2-8,EGFR,LSR,USF2,ID2,GLI1,BMP4,CDKN1B,HOXB9,CAPN1,CPT1A,CYP1B1,HOXA9,HOXA10,HOXA11,MET,PDGFA,HOXA3,PML,SMAD3,HOXA5,LMO4,CRIP1,WNT10A,TGFB1,VDR,RARA,CITED2,FOXB1,STK11,FOXE1,TP63,CEBPB,ALDH1A3,ABL1,NR3C1,SOX9,CACNB4,CFLAR,AIRE,SOCS2,TBX2,SRSF1,PYGO2,STAT6,RELA,WNT7B,KDM5B,HOXB3,NKX2-1,SOD2,MSX1,BAX,NME1,SOSTDC1,RB1CC1,CSF1,DKK3,RHBDD3,ZBTB7B,CCND1,ARID5B,SMARCC1,RARG,ARHGAP35,EPHB3,MDK,PD…	c5_GO.Biological.Process	0.00752356	0.174549	0.407018	0.213065	1.4605	332	CCND1,NR3C1,PRMT5,SLC29A1,CTC1,PYGO2,ZBTB7B,FASN,CEBPB,UPF2,HOXB9,CLCN2,ARID5B,BAX,SOD2,NAGLU,MMP2,HOXA3,HOXA5,CEBPG,STAT6,TGFB1,CAV1,NOTCH1,LHX3,PTCH1,WNT7B,HOXD3,CSNK2A2,ABL1,ASH1L,ORAI1,FOXE1,ATP2C2,ALDH1A3,RARG,XBP1,WNT10A,MDK,IRF6,BCL2L11,SIX4,CAPN1,SOX2,LSR,USF2,GUCD1,ARHGAP5,TBX2,EPHB3,FOXA1,BMP4,AKT2,MED1,WDR77,NF1,RELA,ACER1,ZNF703,ATP7B,TBX1,HOXA9,HOXA10,HOXA11,CUL3,STK11,WNT11,CDH1,SMO…	c5_GO.Biological.Process
GOBP_TISSUE_MORPHOGENESIS	2.89977e-05	0.0031146	0.57561	0.268332	1.62425	447	MMRN2,ADM,IFT122,EGFR,PIK3CD,PLXNB2,SMAD7,PTK7,TNNT2,MIR200C,BMP4,WNT5B,HOXB7,DKK1,ACTB,MYLK,TFAP2A,HMGA2,HOXA11,MET,JAG1,PDGFA,NF2,PML,SMAD3,HOXA5,LMO4,EFEMP2,TGFB1I1,GZF1,WNT10A,TGFB1,MKKS,VDR,STK4,RARA,CITED2,MIR16-1,TCAP,FZD2,NRARP,PRICKLE1,FOXE1,TP63,CLASP1,MYO9A,CELSR2,ALDH1A3,ABL1,NR3C1,SOX9,MRTFA,GRHL3,DVL1,AIRE,TBX2,MYC,GRHL2,LUZP1,WNT7B,JAG2,KRAS,MDM2,KDM5B,NKX2-1,CD151,TNNI3,LBX2,KIF20…	c5_GO.Biological.Process	0.000611053	0.0395165	0.477271	0.213948	1.52183	465	DVL2,KDM6B,NR3C1,DLG3,PTK7,PAFAH1B1,MIR200C,INHBA,SPRY1,CLUAP1,JAG2,SMAD7,CECR2,MIR195,TFAP2A,HOXB7,PAX2,LGR4,FOXC2,NAGLU,MMP2,HOXA5,KAT2A,TGFB1,TBX6,NOTCH1,SOX18,PRKD2,CRYGS,PTCH1,ITGB4,MYC,ACTB,LBX2,WNT7B,FZD1,LIF,MIR16-1,PLXNB2,LZTS2,EPHA4,TMEM59L,PFN1,ABL1,FKBP1A,MKS1,WNT5B,FOXE1,CITED1,ALDH1A3,RARG,FOXD1,WNT10A,MDK,CELSR2,SIX4,CASP3,WNT2B,MKKS,ZFPM1,GRHL2,TBX2,RDH10,ETV2,FZD2,HEG1,OVOL2,VASP…	c5_GO.Biological.Process
GOBP_NEGATIVE_REGULATION_OF_CELL_POPULATION_PROLIFERATION	3.17333e-05	0.00335137	0.557332	0.244885	1.52751	645	CYP27B1,MMRN2,SLC16A2,MEN1,ADM,NKX2-8,TSKU,LYN,PARP10,CTBP1,FTH1,MED31,SMAD7,TFAP4,EFNA1,PTPN6,SEMA4B,BMP4,BTG1,CDKN1B,MIR196A1,DKK1,ARG2,TFAP2A,CYP1B1,BCL6,DDAH1,SEMA3B,NF2,MIR125A,PML,SMAD3,HSPG2,TNS2,GDI2,BMPR1B,EFEMP2,TGFB1I1,TGFB1,RTN4R,TESK1,BRIP1,VDR,STK4,RARA,CITED2,MIR15A,MIR16-1,FAT3,DAB2IP,STK11,ZNF777,RAB3IP,SH2B3,ZNF268,CEBPB,PRKCD,ULK1,MIR29A,MIR29B1,NACC2,SOX9,CAV2,KMT2A,RTN4RL2,CA…	c5_GO.Biological.Process	0.113712	0.528787	0.169571	0.154914	1.14011	666	SIX5,DLG3,PKN1,PTPN9,RTN4RL2,PAFAH1B1,OVOL1,PTPN6,INHBA,SPRY1,MIR149,SMAD7,ZBTB7B,CEBPB,BMPR1B,CHERP,INCA1,MIR195,MIR497,TFAP2A,MIR196A1,CTNNA1,BAX,SOD2,CTBP1,ZNF296,AKIRIN1,MAG,TGFB1,CAV1,MARCHF7,TBX6,NOTCH1,P3H3,PTCH1,MYC,B4GALT7,ZNF777,LIF,MIR15A,MIR16-1,BCL11A,ANG,RBM5,ZNF268,LZTS2,EPHA4,RARB,ATG101,MEN1,PTGDS,BECN1,DUSP1,CTBP2,PLXNB1,ATP5F1A,MAPK11,RARG,IRF6,MIR638,CASP3,SOX2,MIR34A,EFNB3,TP…	c5_GO.Biological.Process
GOBP_POSITIVE_REGULATION_OF_APOPTOTIC_SIGNALING_PATHWAY	3.2081e-05	0.00335137	0.557332	0.383529	1.93008	115	BAD,LTBR,SKIL,RAD9A,PML,BMPR1B,STK4,MIR15A,MIR16-1,DAB2IP,RPL26,FAF1,TP63,PRKCD,NACC2,MYC,MCL1,RACK1,FLCN,MAPK9,TNFSF12,CTNNA1,PLEKHF1,NGFR,MSX1,BAX,TP53,TRAF7,BCAP31,SFPQ,MIR26B,SERINC3,ADCY10,MIR27B,THBS1,DNM1L,INCA1,GSDME,RIPK1,PPP1CA,CTSV,ATF3,NCK1,STK3,TGFBR1	c5_GO.Biological.Process	0.0267646	0.29392	0.352488	0.251457	1.45297	114	MCL1,DEDD2,INHBA,BAD,BMPR1B,INCA1,CTSK,CTNNA1,BAX,HTRA2,CAV1,MYC,SFPQ,MIR15A,MIR16-1,ADCY10,BECN1,BCL2L11,TNFSF12,TP53,ING5,MIR26B,DAB2IP,NF1,PRKCD,TRAF7,NACC2,TNFRSF12A,FLCN,FBH1,MAPK9,ADORA2A,PIAS4,NGFR,RAD9A,RPL26,RET,LTBR	c5_GO.Biological.Process
GOBP_PHOSPHORYLATION	3.55545e-05	0.00364909	0.557332	0.21928	1.42654	1181	BAD,AXL,TNFRSF18,MAP4K5,CDKL1,PAK6,BUB1B,MEN1,MAP4K2,HEXIM1,TP53RK,EEF1A1,CLK4,MAPKAP1,EGFR,ADM2,PIK3CD,TNFRSF1A,CACTIN,PLXNB2,LYN,CTBP1,ATG14,LMTK3,SMAD7,TFAP4,EFNA1,PTPN6,MAST4,BMP4,PRKCH,CDKN1B,DKK1,ACTB,MAPK10,PTPN13,CDK11B,IL11,TRIM65,EGR1,MYLK,IGF1R,BAZ1B,DGKE,PNKP,AKT1S1,HMGA2,NOP53,MET,CBLC,PDGFA,CLCF1,ZNF16,NF2,RALB,CSF2,TAOK2,STK24,LMO4,ERBB3,BMPR1B,FKBP8,CAPRIN2,NEK8,TGFB1,CDK3,PTK2,TE…	c5_GO.Biological.Process	0.000343506	0.0275926	0.498493	0.176673	1.3707	1188	MAP2K7,DVL2,AXL,CCND1,WEE1,DMPK,CDC42BPG,DLG3,MARK4,MAP3K11,MAPKAPK5,PKN1,PPP1R14B,GSK3A,PTPN6,ADM2,TERF2IP,INHBA,CDK3,SPRY1,CACUL1,PRKAG1,RPS6KB2,TBK1,NME6,MOK,BAD,NIBAN1,SMAD7,DDX3X,ADNP,LAT,HCLS1,BMPR1B,NDUFS4,RPS6KB1,INCA1,CIITA,FKBP8,SBK1,EPHA10,MIDN,TRIB3,OBSCN,GAS6,MKNK2,CTDSP2,MERTK,CLN3,TOP1,CREBL2,NEK8,IL11,HAX1,DOK7,HEXIM1,CDC42BPA,BAX,LDB1,CTBP1,MACROH2A1,CHMP6,CCNF,COASY,IPPK,PRKAR1B…	c5_GO.Biological.Process
GOBP_APOPTOTIC_SIGNALING_PATHWAY	3.5888e-05	0.00364909	0.557332	0.2636	1.59996	472	BAD,LTBR,TRAF1,GABARAP,MAZ,TNFRSF1A,NOL3,SGPL1,NFE2L2,BMP4,KRT18,KRT8,NR4A2,SYVN1,CYP1B1,SKIL,RAD9A,HNRNPK,PML,SMAD3,CSF2,STK24,CRIP1,ERBB3,BMPR1B,DDX5,TPT1,TGFB1,STK4,MIR15A,MIR16-1,DAB2IP,MEIS3,STK11,RPL26,FAF1,TP63,PDCD6,P2RX4,IVNS1ABP,CEBPB,BRCA1,PRKCD,ABL1,TMEM109,MIR29B1,NACC2,TNFRSF25,HIC1,TRIB3,MAPK8,CFLAR,PTTG1IP,PYCR1,RELA,MYC,CD27,MCL1,YBX3,RACK1,SFN,FLCN,PTPN1,RHOT2,BAG3,MDM2,MAPK9,NF…	c5_GO.Biological.Process	0.00115385	0.0624472	0.45506	0.208059	1.4812	471	MCL1,GABARAP,BCL2L12,TMBIM6,GSK3A,DEDD2,INHBA,BAD,RFFL,DDX3X,CEBPB,BMPR1B,RPS6KB1,INCA1,BRCA1,MIR195,CTSK,PPP1R13B,TRIB3,MKNK2,CTNNA1,BAX,ATP2A1,SOD2,HTRA2,ELL3,TGFB1,CAV1,MARCHF7,USP47,ZNF385A,MYC,SFPQ,GCLC,FZD1,QRICH1,QARS1,TM2D1,MIR15A,MIR16-1,COA8,TNFRSF25,ADCY10,MADD,CSNK2A2,ABL1,PSME3,BECN1,ARHGEF2,TMEM117,DPF2,NMT1,KRT18,KRT8,XBP1,BCL2L11,BLOC1S2,CASP3,TNFSF12,FASTK,STK24,CCAR2,TP53,ZMYND1…	c5_GO.Biological.Process
GOBP_PROTEIN_PHOSPHORYLATION	4.23703e-05	0.00425153	0.557332	0.225427	1.44628	968	TNFRSF18,MAP4K5,CDKL1,PAK6,MEN1,MAP4K2,HEXIM1,TP53RK,CLK4,MAPKAP1,EGFR,ADM2,PIK3CD,TNFRSF1A,CACTIN,PLXNB2,LYN,CTBP1,ATG14,LMTK3,SMAD7,TFAP4,EFNA1,PTPN6,MAST4,BMP4,PRKCH,CDKN1B,DKK1,ACTB,MAPK10,PTPN13,CDK11B,IL11,TRIM65,EGR1,MYLK,IGF1R,AKT1S1,HMGA2,NOP53,CBLC,PDGFA,CLCF1,NF2,RALB,CSF2,TAOK2,STK24,ERBB3,BMPR1B,FKBP8,CAPRIN2,TGFB1,CDK3,PTK2,TESK1,SPAG9,STK4,RARA,MIR15A,DAB2IP,BMP6,RPS6KA3,AIDA,JAK1,…	c5_GO.Biological.Process	4.80683e-05	0.00853045	0.557332	0.191937	1.46227	978	MAP2K7,DVL2,CCND1,WEE1,DMPK,CDC42BPG,DLG3,MARK4,MAP3K11,MAPKAPK5,PKN1,GSK3A,PTPN6,ADM2,TERF2IP,INHBA,CDK3,SPRY1,CACUL1,PRKAG1,RPS6KB2,TBK1,MOK,NIBAN1,SMAD7,DDX3X,ADNP,LAT,HCLS1,BMPR1B,NDUFS4,RPS6KB1,INCA1,FKBP8,SBK1,EPHA10,TRIB3,GAS6,MKNK2,CTDSP2,MERTK,CLN3,TOP1,CREBL2,IL11,HAX1,DOK7,HEXIM1,CDC42BPA,BAX,CTBP1,MACROH2A1,CHMP6,CCNF,PRKAR1B,ZFYVE28,TGFB1,ACVR2B,CAV1,CCNT1,CSNK1A1,NSD1,ITGB2,PDGFC,NH…	c5_GO.Biological.Process
MAPK.Signaling	4.3633e-05	0.000843571	0.557332	0.321709	1.75289	189	MAP4K2,EGFR,MECOM,TNFRSF1A,EFNA1,CACNB3,RAC3,ACTB,MAPK10,IGF1R,MET,PDGFA,CSF2,ETV4,TGFB1,SOS2,CACNA1D,JAK1,PSMB7,FGF5,MAPK8,CACNB4,UBC,NRAS,RELA,IKBKB,MYC,KRAS,VEGFB,MAPK9,IL1R1,GRIN1,PPP3CA,KITLG,SHC1,NGFR,MAPK11,MAPK12,JUN,IRS1,CSF1,TP53,PSMB2,FGF17,IL1B,FOS,CACNA1H,PDGFRA,AKT2,CDC14B,MAP3K20,IL6R,PRKCG,FGFR2,NTRK1,NFATC1,MAPK3,PRKCA,FGF2,TGFBR1,RRAS2,BDNF,PSMB10,RAF1,MAP3K14,PLA2G4E,IL1A,NR4A1…	NanoString_Genes	0.000842054	0.0325594	0.477271	0.262076	1.64859	189	PLA2G4C,RBX1,RELB,ETV4,GNG12,SHC1,NRAS,NFATC3,TGFB1,PDGFC,CACNA1D,PSMB10,MYC,ACTB,RASGRP2,MAP4K2,VEGFB,DUSP1,MAPK11,MAPK12,NTF3,NFKB2,JAK3,CASP3,FGFR4,TP53,EFNA1,FGF21,UBC,RASGRP1,AKT2,PGF,NF1,RELA,FOS,RRAS2,ITGA2B,PTPN11,MAPK9,EPHA2,MAPK14,IRAK1,TGFBR2,NGFR,RAF1,CACNG6,DUSP4,MAPK8IP1,RET,FGF2,BRAF,FGF19,NTRK1,MAPK3,RAC1,PSMB5,CACNB4,FGF22,FGFR2,EFNA3,PDGFA,MAP2K4,TNFRSF1A,MAP3K5,FGFR3,TAB1	NanoString_Genes
GOBP_REGULATION_OF_CELL_FATE_COMMITMENT	5.12972e-05	0.00504954	0.557332	0.603694	2.24008	28	CHD3,MTA3,CHD4,BMP4,DKK1,LMO4,MTA1,MTA2,SOSTDC1,ESRP1,FGF2,HDAC2,WNT11,GATAD2A	c5_GO.Biological.Process	0.02161	0.270035	0.352488	0.391997	1.63812	30	MTA2,CHD3,CHD4,ESRP1,LOXL3,MTA3,BMP4,GATAD2A,WNT11,LMO4,HDAC2,FGF2	c5_GO.Biological.Process
GOBP_ANTERIOR_POSTERIOR_PATTERN_SPECIFICATION	5.16475e-05	0.00504954	0.557332	0.346293	1.83971	154	BMP4,HOXB6,HOXB7,HOXB8,HOXB9,DKK1,TASOR,HOXA9,HOXA10,HOXA11,HOXA3,HOXA7,SMAD3,HOXA4,HOXA5,HOXA6,HOXC13,HOXA2,FOXB1,BHLHE41,TCAP,ACVR2B,NRARP,PRICKLE1,CELSR2,KMT2A,PCSK6,PLD6,HOXB3,HOXB5,HOXC5,HOXC6,HOXC9,HOXC4,HOXC8,HOXC10,TBX6,MSX1,TP53,HOXC11,HOXB4,BMPR2,RARG,SRF,NOG,HIPK2,NR2F2,CDON,HES4,ACVR2A,HES7,TGFBR1,SMAD2,GRSF1,NOTCH1,SSBP3,MIB1,LEFTY1,EP300,FOXA2,TBX1,FUZ,FOXC1,AURKA,WNT3A,HIPK1,HEY1	c5_GO.Biological.Process	2.75337e-05	0.00700366	0.57561	0.307638	1.9088	163	TDRKH,HOXB6,HOXB7,HOXB8,HOXB9,LDB1,FOXC2,PCSK6,HOXA3,HOXA5,HOXA6,HOXA4,HOXA7,KAT2A,ACVR2B,HOXC13,TBX6,NOTCH1,HOXD3,HOXD4,POGLUT1,HOXC11,RARG,CELSR2,WNT2B,TP53,PBX3,HOXC5,HOXC6,HOXC9,KDM2B,BMP4,TASOR,HOXC4,HOXC8,HOXC10,TBX1,HOXA9,HOXA10,HOXA11,PLXNA2,MED12,SMO,FOXC1,PLD6,LRP5,CDX2,FOXB1,HOXD10,FUZ,YY1,EP300,TCAP,EMX2,HOXB3,HOXB4,HOXB5,HHEX,HOXB2,HES7,FRS2,ETS2,NRARP,BMPR2,CYP26C1,MSX1,NOG,ARC,TULP…	c5_GO.Biological.Process
GOBP_NEGATIVE_REGULATION_OF_SIGNALING	5.48679e-05	0.00529649	0.557332	0.222128	1.43427	1056	TLE6,MMRN2,MEN1,UBR2,ADM,IFT122,MAPKAP1,PTPN18,HTRA4,TSKU,EGFR,MECOM,MAZ,CACTIN,NOL3,AMER1,LYN,FSTL3,NFE2L2,SMAD7,GLI1,WFIKKN1,EFNA1,MIR200C,PTPN6,BMP4,TRABD2B,SESN1,DKK1,NR4A2,IL11,EGR1,IGF1R,BCL9L,TRABD2A,SYVN1,AKT1S1,SKOR1,NR1D1,NOP53,CHD8,BCL6,MET,CBLC,SH2D1A,SKIL,MIRLET7A1,MIRLET7F1,NF2,MIRLET7E,MIR125A,CSF2,TNS2,RGS20,ERBB3,STMN3,TPT1,HAPSTR1,CDK3,ISG15,STK4,MGRN1,MIR15A,MIR16-1,RNF213,DAB2…	c5_GO.Biological.Process	0.00544463	0.148386	0.407018	0.168555	1.29241	1062	RBX1,MCL1,TMEM88,PHPT1,ZBTB7A,PRMT1,TMBIM6,RUVBL2,PALM,MAPKAPK5,KPTN,USP7,PAFAH1B1,WFIKKN1,GSK3A,MIR200C,PTPN6,ISG15,INHBA,CDK3,FAM89B,SPRY1,MKRN2,TBK1,GPC1,MIR149,CBY1,SMAD7,RFFL,DDX3X,ADNP,ACHE,TLE5,RPS6KB1,BRCA1,MIR195,MIR497,PPARA,MIDN,SNX25,LGR4,GAS6,SIGIRR,IL11,CTNNA1,BICD1,BAX,SOD2,CHMP6,HTRA2,ELL3,LRP1,ZFYVE28,CAV1,VPS18,CSNK1A1,MARCHF7,HDAC7,NOTCH1,USP47,ELF1,CNKSR3,ZNF385A,ZNF592,YWHAZ,…	c5_GO.Biological.Process
GOBP_POSITIVE_REGULATION_OF_PROGRAMMED_CELL_DEATH	5.80817e-05	0.00553664	0.557332	0.269709	1.62089	416	BAD,LTBR,CTSD,ADM,CAPN2,PTPA,HTRA4,PIK3CD,TNFRSF1A,LYN,TFAP4,BMP4,BTG1,TFAP2A,CYP1B1,BCL6,SKIL,RAD9A,MIR125A,PML,HOXA5,BMPR1B,TGFB1,VDR,STK4,MIR15A,MIR16-1,DAB2IP,MIR101-1,RPL26,FAF1,TP63,ZNF268,UBE2M,ALDH1A3,TNFAIP8,PRKCD,SLC27A4,ABL1,NR3C1,MIR29A,MIR29B1,NACC2,MAPK8,CFLAR,EMILIN1,BRMS1,MYC,SLC9A1,MCL1,B4GALT1,TP53INP1,RACK1,PIP5KL1,FLCN,MAPK9,RPS6KA2,PXT1,SOD2,NOD1,TNFSF12,CTNNA1,PLEKHF1,NGFR,F…	c5_GO.Biological.Process	0.0325145	0.317297	0.321776	0.183226	1.28671	413	MCL1,NR3C1,MARK4,MAP3K11,DEDD2,INHBA,BAD,DDX3X,TLE5,GSN,BMPR1B,INCA1,MIR195,CTSK,TFAP2A,CTNNA1,BAX,SOD2,HTRA2,MMP2,HOXA5,SPHK2,TGFB1,CAV1,CCAR1,NOTCH1,UBE2Z,ATP2A2,MYC,SFPQ,QRICH1,MIR15A,MIR16-1,HSPD1,BACE1,NOS2,ADCY10,RBM5,ZNF268,RARB,ABL1,BECN1,PTPA,ALDH1A3,RARG,BCL2L11,DNM2,EIF2B5,CASP3,TNFSF12,CCAR2,MIR34A,DFFA,TP53,ING5,MFN2,RPS6KA2,APBB1,PXT1,MIR26B,FOXA1,TNFRSF10A,BMP4,C1QBP,FNIP1,MIR125A,…	c5_GO.Biological.Process
GOBP_REGULATION_OF_BIOMINERAL_TISSUE_DEVELOPMENT	6.08802e-05	0.00573176	0.557332	0.450845	2.02673	64	CYP27B1,BCOR,BMP4,TFAP2A,SMAD3,BMPR1B,TGFB1,ISG15,VDR,BMP6,ACVR2B,CEBPB,NBR1,SOX9,OSR2,SLC20A2,BGLAP,ECM1,RFLNA,RXRA,BMPR2,ANO6,TRPM4,ATF4,S1PR1,ACVR2A,NOTCH1	c5_GO.Biological.Process	0.0107889	0.202784	0.38073	0.31667	1.62721	65	ISG15,CEBPB,BMPR1B,NBR1,TFAP2A,GAS6,TGFB1,ACVR2B,NOTCH1,BMP4,WNT4,MATN1,FZD9,CYP27B1,BMP7,S1PR1,HIF1A,NOTUM,ATF4,ADGRV1,COMP,BMPR2,VDR,LTBP3,TRPM4,MIR208A,ATRAID,OSR2,SLC20A2	c5_GO.Biological.Process
GOBP_RESPONSE_TO_GROWTH_FACTOR	6.30113e-05	0.00586005	0.538434	0.249369	1.53755	552	MMRN2,MEN1,EEF1A1,HTRA4,EHD1,EGFR,PIK3CD,FSTL3,SMAD7,WFIKKN1,ZFP36L2,MIR200C,BMP4,MIR196A1,DKK1,EGR1,IGF1R,NPR2,BCL9L,AKT1S1,SKOR1,SKIL,FNTA,HAS2,MIRLET7F1,PML,SMAD3,PAX9,BMPR1B,ITGB6,FKBP8,TGFB1I1,DDX5,FRS3,WNT10A,TGFB1,PTK2,CITED2,MIR15A,MIR16-1,DAB2IP,PMEPA1,BMP6,SOX6,ACVR2B,STK11,KIF16B,FGF5,TGIF1,PDCD6,ATP2B4,ABL1,NR3C1,MIR29B1,SOX9,CAV2,KMT2A,CFLAR,ZBTB7A,EHD4,PCSK6,EMILIN1,TBX2,BRMS1,MIR26…	c5_GO.Biological.Process	0.000328286	0.0272299	0.498493	0.208385	1.51021	571	TGFBR3L,NR3C1,ZBTB7A,PRMT1,EHD1,WFIKKN1,MIR200C,KNSTRN,FAM89B,SPRY1,GPC1,MIR149,SHC1,SMAD7,ZFP36,BMPR1B,RPS6KB1,MIR195,MIR497,DYNC1LI2,CTSK,ARNT,FKBP8,MIR196A1,PAX2,PPARA,SNX25,GAS6,NPR2,WASF1,HTRA2,PCSK6,FLRT1,KAT2A,TGFB1,ACVR2B,CAV1,NOTCH1,PRKD2,PDE2A,MYC,GCLC,FZD1,MIR15A,MIR16-1,MIR10B,PPP2R5B,CSNK1E,IL17RD,MEN1,VEGFB,ABL1,FKBP1A,BECN1,CHURC1,LTBP4,CITED1,FOXD1,ARPC3,WNT10A,NTF3,UBE2D3,HSP90AB…	c5_GO.Biological.Process
KEGG_PATHWAYS_IN_CANCER	6.83296e-05	0.0391874	0.538434	0.295112	1.68507	260	BAD,TRAF1,EGFR,MECOM,PIK3CD,CTBP1,GLI1,BMP4,WNT5B,CDKN1B,RAC3,MAPK10,IGF1R,MET,CBLC,PDGFA,PML,SMAD3,RALB,WNT10A,TGFB1,PTK2,LAMC1,STK4,RARA,SOS2,JAK1,FGF5,FZD2,ABL1,MAPK8,DVL1,RUNX1,NRAS,TRAF4,RELA,IKBKB,MYC,NFKBIA,WNT7B,KRAS,VEGFB,WNT9A,MDM2,MAPK9,CTNNA1,KITLG,CKS1B,SPI1,BAX,JUN,CSF3R,RXRA,TP53,CCND1,FGF17,FOS,CASP8,PDGFRA,AKT2,TCF7,TFG,LAMB3,RASSF5,PRKCG,FGFR2,PTCH1,NTRK1,MAPK3,EGLN3,PRKCA,LAMC3…	c2_curated.Canonical.Pathways	0.0521583	0.411146	0.266351	0.198325	1.2986	268	RBX1,DVL2,CCND1,SLC2A1,BAD,CKS1B,ARNT,NRAS,LAMB2,CTNNA1,BAX,CTBP1,MMP2,TGFB1,PTCH1,MYC,WNT7B,FZD1,NOS2,CDK2,RARB,VEGFB,ABL1,PIK3R2,WNT5B,CTBP2,HSP90AA1,WNT10A,NFKB2,HSP90AB1,CASP3,WNT2B,TP53,TRAF4,FZD2,FGF21,CREBBP,BMP4,AKT2,LAMC1,PGF,RELA,FOS,FZD4,ITGA2B,CDC42,E2F1,WNT11,CDH1,SMO,WNT4,MAPK9,STAT5A,STAT5B,TGFBR2,GSTP1,PIAS4,RALGDS,RAF1,EP300,CSF3R,HDAC2,ITGA3,APC2,RET,FZD9,FGF2,BRAF,FGF19,NTRK1,M…	c2_curated.Canonical.Pathways
GOBP_REGULATION_OF_CELL_ADHESION	6.89893e-05	0.0063387	0.538434	0.25326	1.55339	520	BAD,TNFRSF18,MBP,SMARCD2,RIN2,PLEKHA2,CLDN7,MIR192,ATP5F1B,PLXNB2,LYN,FSTL3,SMAD7,EFNA1,MIR141,PTPN6,FLOT2,BMP4,AP3D1,RAC3,ACTB,ARG2,CYP1B1,BCL6,JAG1,HOXA7,FUT4,HAS2,NF2,MIRLET7E,MIR125A,PML,SMAD3,FUT7,HSPG2,SOX12,ERBB3,EFEMP2,TGFB1,F11R,PTK2,TESK1,LAMC1,DHPS,STK4,RARA,CITED2,CD164,PIEZO1,BMP6,JAK1,NRARP,SH2B3,FAF1,SHB,CLASP1,CELSR2,CEBPB,RHOH,PRKCD,YTHDF2,ABL1,SOX9,EMILIN1,RUNX1,RELA,CD27,SLC9A1…	c5_GO.Biological.Process	0.0249345	0.286129	0.352488	0.178396	1.28811	526	MIR192,SIPA1,NFAT5,MIR141,PTPN6,STX3,BAD,JAG2,SMAD7,ZBTB7B,CLDN7,CEBPB,ALOX12,ARL2,PPARA,LAMB2,FUT7,LDB1,FOXC2,LOXL3,MMP2,HOXA7,TGFB1,F11R,TNFSF9,CAV1,TNFRSF13C,MARCHF7,NOTCH1,ITGB2,PRKD2,CD4,DHPS,ACTB,LIF,PRKCE,PLXNB2,WNK1,HSPD1,AP3D1,EPHA4,RASAL3,FERMT3,ABL1,PIK3R2,CCDC88B,MELTF,DUSP1,CARD11,PLXNB1,SWAP70,XBP1,VAV1,MDK,JAK3,CELSR2,CASP3,SOX2,EFNB3,EFNA1,ADAM15,FUT1,NCKAP1L,PPM1F,RASGRP1,EPHB3,F…	c5_GO.Biological.Process
GOBP_REGULATION_OF_LYMPHOCYTE_DIFFERENTIATION	7.02277e-05	0.00637567	0.538434	0.350273	1.83856	146	BAD,AXL,SMARCD2,ID2,SMAD7,ZFP36L2,PTPN6,BMP4,AP3D1,ACTB,BCL6,SOX12,RARA,SOS2,CYP26B1,NRARP,SHB,RHOH,ABL1,RUNX1,CD27,JUNB,ARID1B,FOXJ1,NFKBIZ,ARID1A,SOX13,SPI1,NCKAP1L,FOXP3,IL4I1,PRKCZ,ZEB1,ZBTB7B,ZFP36L1,TNFSF4,KAT5,SMARCC1,ARID2,MDK,TCF7,FOXN1,LAG3	c5_GO.Biological.Process	0.143925	0.573521	0.158514	0.196369	1.20371	150	AXL,PTPN6,INHBA,BAD,SMAD7,ZBTB7B,GAS6,LOXL3,KAT2A,TNFSF9,ACTB,AP3D1,ABL1,CARD11,XBP1,MDK,JAK3,NCKAP1L,RASGRP1,BMP4,SMARCE1,RNF41,NFKBID,ZEB1,AMBRA1,SOCS1,XRCC6,STAT5B,SMARCD2,TGFBR2,ACTL6B,SMARCA2,ZFP36L2,MALT1,BRAF,ADAM8,SHB,PRKCZ,KAT5,CLPTM1,LGALS9,BTK,BTN2A2,PBRM1,PCID2,PRDX2,CBFB,NRARP	c5_GO.Biological.Process
GOBP_MYELOID_CELL_DIFFERENTIATION	7.32639e-05	0.00657307	0.538434	0.285293	1.6528	302	GPR137,LTBR,NCOA6,FOSL2,PIK3CD,SLC1A5,LYN,FSTL3,MAEA,ID2,PTPN6,ANXA2,BMP4,HOXB7,HOXB8,IL11,HOXA9,BCL6,JAG1,HOXA7,ZNF16,PML,HOXA5,CSF2,ITGB6,TGFB1,ISG15,RARA,CITED2,SH2B3,CEBPB,LRRK1,GABPA,NR3C1,KMT2E,CFLAR,ZBTB7A,SMAP1,RUNX1,MYC,NFKBIA,P4HTM,VPS54,JUNB,NBEAL2,PPP3CA,KITLG,SPI1,FOXP1,ERCC2,NCKAP1L,MAPK11,SNX10,BGLAP,CSF1,CSF3R,RACGAP1,ETV2,ZFP36L1,RPTOR,DMTN,CDC73,FOS,MEIS1,CASP8,RARG,PKNOX1,CDIN1…	c5_GO.Biological.Process	0.000408435	0.0301138	0.498493	0.23882	1.6325	308	SLC1A5,NR3C1,RELB,ZBTB7A,PRMT1,PAFAH1B1,ACIN1,PTPN6,ISG15,INHBA,GPR137,ZFP36,HCLS1,FASN,CEBPB,TCIRG1,ARNT,HOXB7,HOXB8,IL11,HAX1,LDB1,MAEA,NAGLU,RCOR1,HOXA5,HOXA7,CEBPG,TGFB1,GP1BB,FARP2,ZNF385A,L3MBTL1,CD4,EIF6,MYC,RPTOR,LIF,NBEAL2,BATF3,PURB,MAPK11,LRRK1,RARG,CASP3,ZFPM1,ETV2,NCKAP1L,RASGRP4,BRD1,JMJD6,BMP4,MTURN,MED1,RNF41,NEDD9,JAGN1,NF1,NCAPG2,TYROBP,FSTL3,HOXA9,FOS,MEIS1,CD109,PKNOX1,MEIS2,C…	c5_GO.Biological.Process
GOBP_REGULATION_OF_OSSIFICATION	7.56122e-05	0.00670487	0.538434	0.410273	1.95831	85	CYP27B1,BCOR,SMAD7,BMP4,DKK1,TFAP2A,SMAD3,BMPR1B,ISG15,VDR,BMP6,ACVR2B,NBR1,SOX9,KREMEN2,DHRS3,OSR2,SLC20A2,BGLAP,ECM1,CSF1,RFLNA,RXRA,BMPR2,RUNX2,MDK,ADCY10,ANO6,KREMEN1,TRPM4,CHSY1,MAPK3	c5_GO.Biological.Process	0.0992063	0.496174	0.199915	0.238019	1.28479	85	ISG15,SMAD7,BMPR1B,NBR1,TFAP2A,ACVR2B,NOTCH1,ADCY10,MDK,BMP4,PTPN11,WNT4,MAPK14,MATN1,FZD9,CYP27B1,BMP7,MAPK3,SMAD6,S1PR1,HIF1A,LRP4,NOTUM,ADGRV1,COMP,BMPR2,KREMEN2,VDR,LTBP3,TRPM4,NIPBL,MIR208A,ATRAID,OSR2,SLC20A2	c5_GO.Biological.Process
REACTOME_INTRACELLULAR_SIGNALING_BY_SECOND_MESSENGERS	7.91582e-05	0.0391874	0.538434	0.299231	1.69224	241	BAD,MAPKAP1,EGFR,MECOM,PIK3CD,CHD3,MTA3,CHD4,CDKN1B,EGR1,AKT1S1,MET,PDGFA,PML,BTC,ERBB3,MOV10,PHC3,LAMTOR1,PSMB7,FGF5,PRKCD,TRIB3,UBC,NEDD4,TNRC6A,MAF1,ADCY9,MTA1,MDM2,MTA2,RICTOR,ATN1,KITLG,ITPR3,RHOG,LAMTOR2,JUN,IRS1,PRKAR1A,PHLPP1,TP53,PSMB2,RPTOR,FGF17,PSMD4,STUB1,MKRN1,PDGFRA,CAMKK1,PSMD13,AKT2,ADCY7,HDAC7,PRKCG,FGFR2,PSMC2,MAPK3,PRKCA,PRKCE,PSMD9,PPP2R5D,PIK3R3,ITPR2,PSMA5,FGF2,HDAC2,GATAD2…	c2_curated.Canonical.Pathways	0.0113159	0.191741	0.38073	0.217534	1.41799	248	PSMC3,TNRC6B,USP7,GSK3A,MTA2,CHD3,PSMB6,MOV10,RPS6KB2,BAD,ADCY3,CHD4,TRIB3,ATN1,RCOR1,PRKAR1B,PSMD8,MTA3,HDAC7,PSMD3,PSMB10,RPTOR,PIP5K1C,PRKCE,LAMTOR2,PPP2R5B,CSNK2A2,PIK3R2,PSME3,PRR5,CBX4,VAV1,FGFR4,TP53,ADCY5,PSMA1,CAMK2G,UBC,ITPR2,AKT2,GATAD2A,ADCY7,MAF1,PRKCD,PSMA7,ADCY6,PSMD11,PSME4,PTPN11,LAMTOR3,PSMD4,IRAK1,RRAGD,MLST8,AKT1S1,PHLPP2,LAMTOR4,SCMH1,RHOG,HDAC2,WWP2,GAB2,FOXO4,FGF2,PPP2CA,FG…	c2_curated.Canonical.Pathways
GOBP_APPENDAGE_DEVELOPMENT	8.37955e-05	0.00734511	0.538434	0.35188	1.82314	140	TMEM231,IFT122,MED31,BMP4,DKK1,NPR2,TFAP2A,HOXA9,HOXA10,HOXA11,ECE1,HOXC13,RARA,CYP26B1,IFT140,PRICKLE1,TP63,RECK,SOX9,TBX2,KREMEN2,GRHL2,VPS54,RSPO4,OSR2,HOXC10,MSX1,BAX,BAK1,HOXC11,BMPR2,RUNX2,RARG,EXT1,FOXN1,MAP3K20,NOG,KREMEN1,WDPCP,FGFR2,PTCH1,HDAC2,SP9,SALL4,IRF6,FBXW4,RDH10,IFT80,NOTCH1,DLX6,NIPBL	c5_GO.Biological.Process	0.00966976	0.194149	0.38073	0.243053	1.48987	150	ECE1,TFAP2A,NPR2,BAX,NAGLU,ZNF358,FBXW4,KAT2A,HOXC13,NOTCH1,B9D1,PTCH1,ITGB4,RARB,HOXC11,MKS1,RARG,IRF6,BCL2L11,GRHL2,SP9,TBX2,RDH10,CREBBP,BMP4,MED1,SLC39A1,HOXC10,HOXA9,HOXA10,HOXA11,PLXNA2,TMEM107,LRP5,HOXD10,HOXD12,ZNF141,PIAS4,VPS54,HDAC2,CRABP2,MEGF8,NFIA,BMP7,LRP4,FGFR2,IQCE,COMP,BMPR2,MSX1,KREMEN2,CIBAR1,NOG,TULP3,RSPO4,WNT7A,NIPBL,WDPCP,OSR2,MAP3K20,EVX2,IFT140,KDF1,COL2A1,MED31,KREMEN1,…	c5_GO.Biological.Process
GOBP_RESPONSE_TO_ABIOTIC_STIMULUS	8.79627e-05	0.00762277	0.538434	0.233809	1.4813	798	RDH11,BAD,KCNK4,SCNN1A,LTBR,MEN1,ADM,CAPN2,FOSL2,SLC38A2,EGFR,HOXA1,THBD,TNFRSF1A,NOL3,LYN,PLEC,BEST1,NFE2L2,ID2,FOSB,ERCC1,TMEM87A,CAPN3,CDKN1B,KRT8,NR4A2,MAPK10,EGR1,MYLK,IGF1R,TULP1,CIRBP,PNKP,NSMF,NOP53,RAD9A,DDAH1,PML,SMAD3,HSPG2,H2AX,CRIP1,ITGB6,NLRP1,TGFB1,SCFD1,F11R,USF1,PTK2,MKKS,WDR83,BRIP1,CITED2,FOXB1,PIEZO1,BMP6,PPP1R1B,TCAP,STK11,RPL26,CLN3,PRICKLE1,XPA,SLC25A23,PDCD6,BRCA1,CIAO3,AL…	c5_GO.Biological.Process	0.00198924	0.0877451	0.431708	0.182987	1.36859	798	RBX1,MAP2K7,LRRC8E,CCND1,RELB,TMBIM6,RUVBL2,PALM,SIPA1,DNAJC7,ERCC4,NFAT5,PKN1,SLC2A1,KARS1,SLC29A1,CYGB,SLC25A23,BAD,KCNK4,SWI5,DDX3X,GSN,RPS6KB1,BRCA1,ARNT,OGG1,NR2F6,PPARA,USP19,CIRBP,RBM4,PDE6B,ANO1,CLN3,REV1,PRDM12,AQP10,AGTRAP,BAX,SOD2,HTRA2,MMP2,MCOLN1,MAG,TGFB1,F11R,USF1,CAV1,NOTCH1,USP47,STC2,PTCH1,PDE2A,RNF168,WDR83,MYC,GCLC,TSPYL5,RPTOR,SPRTN,LIF,FOSB,PRKCE,POLH,WNK1,TRPC3,HSPD1,H2AX,B…	c5_GO.Biological.Process
GOBP_BONE_MINERALIZATION	9.09226e-05	0.00779074	0.538434	0.410185	1.94268	80	CYP27B1,BCOR,FOSL2,BMP4,TFAP2A,SMAD3,BMPR1B,ISG15,VDR,TUFT1,BMP6,ACVR2B,PRICKLE1,NBR1,SOX9,OSR2,SLC20A2,ERCC2,SNX10,BGLAP,ECM1,RFLNA,RXRA,BMPR2,ZBTB40,ANO6,TRPM4,ATF4,FGFR2,LGR4,WNT11,S1PR1,ACVR2A,IFT80	c5_GO.Biological.Process	0.0498008	0.395415	0.287857	0.258323	1.37371	80	ZBTB40,ISG15,BMPR1B,NBR1,TFAP2A,LGR4,ACVR2B,TUFT1,BMP4,CCDC154,WNT11,WNT4,ERCC2,MATN1,FZD9,CYP27B1,PTH1R,BMP7,LOX,S1PR1,HIF1A,NOTUM,FGFR2,ATF4,ADGRV1,FGFR3,COMP,BMPR2,SBDS,VDR,LTBP3,TRPM4,MIR208A,ATRAID,OSR2,CLEC3B,SLC20A2	c5_GO.Biological.Process
REACTOME_REGULATION_OF_HMOX1_EXPRESSION_AND_ACTIVITY	9.09462e-05	0.0391874	0.538434	0.933296	2.00742	5	HM13,NFE2L2	c2_curated.Canonical.Pathways	0.898406	0.961163	0.0503964	0.269677	0.627575	5	NFE2L2,HMOX1,HM13	c2_curated.Canonical.Pathways
GOBP_MULTICELLULAR_ORGANISMAL_LEVEL_HOMEOSTASIS	9.45737e-05	0.00801354	0.538434	0.249043	1.52985	539	TBL1XR1,GPR137,AXL,SCNN1A,MBP,ZG16B,FOSL2,TSKU,FBXL5,PIK3CD,LSR,HAMP,SLC1A5,LYN,MAEA,ID2,PPP1R13L,BMP4,PWWP2B,HOXB6,LCN2,RAC3,ACTB,INAVA,OXT,EGR1,IGF1R,TULP1,SH2B2,NR1D1,CARD9,BCL6,NT5E,SKIL,RMI1,ZNF16,PIWIL4,HAS2,HOXA5,TNS2,ITGB6,F11R,MKKS,ISG15,LAMC1,SOS2,CITED2,ESAM,BMP6,ACVR2B,STK11,PRICKLE1,SH2B3,P2RX4,CEBPB,LRRK1,GNAS,ABL1,SOX9,KMT2E,KMT2A,CFLAR,ZBTB7A,SMAP1,PER2,STAT6,ACADVL,P4HTM,CORO1A,V…	c5_GO.Biological.Process	0.0259646	0.292477	0.352488	0.1785	1.29602	551	SLC1A5,AXL,KDM6B,ZBTB7A,PRMT1,NKIRAS2,PKN1,ACIN1,NXNL1,SLC2A1,ISG15,INHBA,GPR137,ZFP36,ACHE,ZBTB7B,LAT,HCLS1,CARD9,CEBPB,TCIRG1,CTSK,ARNT,SLC25A25,HOXB6,LGR4,SART3,MERTK,UBAP2L,BAX,LDB1,SOD2,MAEA,ABCA3,FOXC2,NAGLU,RCOR1,HOXA5,CEBPG,STAT6,F11R,ACVR2B,CAV1,NOTCH1,PDGFC,ACTB,MFAP2,BMAL1,INAVA,NR1H3,ABL1,CDH3,MKS1,PRCP,CARD11,SPNS2,MAPK11,LRRK1,ABHD6,BCL2L11,JAK3,CASP3,MKKS,LSR,HAMP,ZFPM1,GNAS,ETV2,B…	c5_GO.Biological.Process
GOBP_POSITIVE_REGULATION_OF_INTRINSIC_APOPTOTIC_SIGNALING_PATHWAY	9.66521e-05	0.00809966	0.538434	0.46118	2.01085	54	BAD,SKIL,RAD9A,MIR15A,MIR16-1,RPL26,NACC2,MYC,MCL1,RACK1,FLCN,PLEKHF1,MSX1,BAX,TP53,BCAP31,SFPQ,SERINC3,ADCY10,MIR27B,DNM1L,GSDME	c5_GO.Biological.Process	0.0286937	0.302016	0.352488	0.313318	1.53637	55	MCL1,BAD,BAX,CAV1,MYC,SFPQ,MIR15A,MIR16-1,ADCY10,BECN1,BCL2L11,TP53,NACC2,FLCN,FBH1,PIAS4,RAD9A,RPL26,BCAP31,SKIL,FBXW7,MSX1,NCK1,RACK1,BBC3,STYXL1,NUPR1	c5_GO.Biological.Process
Estrogen-dependent gene expression; datasource: reactome;	0.000101554	0.0592694	0.538434	0.411446	1.93753	79	CTSD,NRIP1,USF2,GTF2A1,SP1,FOSB,STAG2,DDX5,MOV10,USF1,PTGES3,CXXC5,KDM4B,ZNF217,RUNX1,MYC,TNRC6A,GTF2F1,TLE3,JUN,CCND1,NCOA3,POLR2B,KAT5,FOS,RAD21,POU2F1,NCOA2,SMC1A,TNRC6C,CARM1,JUND,EP300,PRMT1,FOXA1,MED1,HSP90AA1	PathwayCommons11	0.00689736	0.538184	0.407018	0.301957	1.62189	84	CCND1,PRMT1,TNRC6B,MOV10,GTF2F1,USF1,CCNT1,JUND,KDM4B,MYC,FOSB,POLR2E,CITED1,HSP90AA1,HSP90AB1,USF2,CREBBP,FOXA1,MED1,FOS,CXXC5,PTGES3,YY1,EP300,ZNF217,TBP,NCOA1,POLR2G,POLR2F,KAT5	PathwayCommons11
REACTOME_POTENTIAL_THERAPEUTICS_FOR_SARS	0.000102739	0.0391874	0.538434	0.415266	1.97046	79	CHD3,MTA3,KEAP1,NFE2L2,CHD4,FNTA,JAK1,PTGES3,SIGMAR1,NR3C1,IMPDH1,BRMS1,ATP1B3,MTA1,MTA2,IL1R1,ATP1A1,ATP1B1,FXYD3,ARID4B,IL6R,RIPK1,HDAC2,GATAD2A,SYK,SAP30L,RCOR1,S1PR1,ATP1A3,NCK1,ACE2,FKBP1A,TBK1,ARID4A,HMG20B,AP2A1,HSP90AA1,BRD4	c2_curated.Canonical.Pathways	0.0161948	0.220323	0.352488	0.289822	1.57219	82	RBX1,NR3C1,MTA2,CHD3,TBK1,CHD4,RCOR1,MTA3,IMPDH2,FKBP1A,FNTB,HSP90AA1,VAV1,JAK3,HSP90AB1,ATP1A3,GATAD2A,CUL3,COMT,PTGES3,BRD4,CD79A,HDAC2,BRMS1,NFE2L2,S1PR1,FXYD1,FXYD7,BTK	c2_curated.Canonical.Pathways
WP_PLEURAL_MESOTHELIOMA	0.000103561	0.0391874	0.538434	0.279224	1.64143	318	BUB1B-PAK6,PAK6,MAP4K2,RASSF4,EGFR,PIK3CD,CTBP1,SP1,EFNA1,WNT5B,DKK1,ACTB,MAPK10,IGF1R,TEAD3,AKT1S1,CHD8,MET,PDGFA,NF2,CSF2,BTC,CDH16,WNT10A,TGFB1,PTK2,LAMC1,FRAT2,RPS6KA3,JAK1,FGF5,FZD2,BRCA1,GABPA,ULK1,MAPK8,DVL1,MYC,MCL1,ADAMTSL4-AS1,WNT7B,VEGFB,MDM2,TNIK,MAPK9,CTNNA1,KITLG,ITPR3,SLC3A2,SHC1,NGFR,BAX,BAK1,JUN,NDRG1,RB1CC1,CSF1,AJUBA,MAP4K4,PRKAG1,HCFC1,TP53,CCND1,MAP3K10,RPTOR,FGF17,IL1B,MKNK1…	c2_curated.Canonical.Pathways	0.00323481	0.0888193	0.431708	0.214902	1.44515	331	MAP2K7,MCL1,ADAMTSL4-AS1,DVL2,CCND1,MAP3K11,CDH24,SLC2A1,UHRF1,PRKAG1,RPS6KB2,SHC1,CSNK2A3,RPS6KB1,BRCA1,LAMB2,MKNK2,CTNNA1,BAX,CTBP1,MMP2,TGFB1,CSNK1A1,ITGB2,EIF4B,PDGFC,ITGB4,MYC,ACTB,RPTOR,WNT7B,FZD1,CSNK1E,CDK2,CSNK2A2,MAP4K2,VEGFB,CDH3,CDH16,WNT5B,BECN1,CTBP2,WNT10A,NTF3,MDK,FGFR4,WNT2B,TP53,WDR5,EFNA1,FZD2,EFNA4,FGF21,EIF4EBP1,BUB1B-PAK6,PAK6,AKT2,NTF4,LAMC1,PGF,CHD8,PRSS23,E2F1,WNT11,CDH1,…	c2_curated.Canonical.Pathways
GOBP_ANIMAL_ORGAN_MORPHOGENESIS	0.000108496	0.00899341	0.538434	0.238167	1.4936	697	BCOR,EDAR,ADM,IFT122,FOSL2,TSKU,EGFR,HOXA1,SGPL1,ID2,SMAD7,PTK7,GLI1,EFNA1,PPP1R13L,FSCN2,TNNT2,BMP4,HOXB6,HOXB7,HOXB8,HOXB9,DKK1,CAPN1,MYLK,TULP1,NPR2,TFAP2A,HOXA9,HOXA11,JAG1,PDGFA,HOXA3,HOXA7,HAS2,NF2,PML,SMAD3,HOXA4,HOXA5,HOXC13,CRIP1,PAX9,BMPR1B,ITGB6,EFEMP2,HOXA2,GZF1,ZFAND5,WNT10A,NEK8,TGFB1,PTK2,MKKS,VDR,RARA,CITED2,FAT3,TUFT1,CYP26B1,BMP6,SOX6,TCAP,ACVR2B,MEIS3,IFT140,FGF5,FZD2,SATB2,PRI…	c5_GO.Biological.Process	4.70507e-06	0.00188971	0.610527	0.214551	1.59296	747	DVL2,NR3C1,PTK7,PAFAH1B1,GSK3A,INHBA,FGD1,SPRY1,CLUAP1,JAG2,FSCN2,SMAD7,CEBPB,TPRN,BMPR1B,TCIRG1,MIR195,TFAP2A,HOXB6,HOXB7,HOXB8,HOXB9,PAX2,PPARA,LGR4,NPR2,COL27A1,NEK8,CTNNA1,ARID5B,BAX,C12orf57,FOXC2,NAGLU,MMP2,ANKRD11,HOXA3,HOXA5,HOXA4,HOXA7,STAT6,TGFB1,ELN,ACVR2B,CAV1,HOXC13,TBX6,VPS51,NOTCH1,ZHX2,LHX3,PDGFC,SOX18,SRSF6,PTCH1,ITGB4,MYC,WNT7B,FZD1,LIF,STK40,HOXD3,HOXD4,MFAP2,LZTS2,RARB,BSG,HOX…	c5_GO.Biological.Process
GOBP_CELL_CELL_SIGNALING_BY_WNT	0.000115795	0.00949521	0.538434	0.267314	1.57483	358	TBL1XR1,TLE6,TMEM9,CTDNEP1,TSKU,EGFR,AMER1,TMEM237,PTK7,GLI1,WNT5B,TRABD2B,DKK1,RAC3,NR4A2,EGR1,BCL9L,TRABD2A,CHD8,SMAD3,TGFB1I1,CAPRIN2,WNT10A,SPIN1,TGFB1,STK4,RNF213,DAB2IP,FRAT2,STK11,RPS12,FZD2,NRARP,PRICKLE1,G3BP1,CELSR2,RECK,LRRK1,ABL1,TMEM132A,MIR29B1,SOX9,HIC1,IGFBP4,GRHL3,GRK6,DVL1,PBXIP1,PYGO2,MIR26A1,KREMEN2,WNT7B,RACK1,RSPO4,WNT9A,TNIK,MCC,SOX13,LBX2,TLE1,TLE3,RAB5A,ZBTB33,LZTS2,SOSTD…	c5_GO.Biological.Process	0.0219229	0.270035	0.352488	0.194062	1.34602	370	RBX1,DVL2,CCND1,TMEM88,RUVBL2,PTK7,GSK3A,CBY1,PYGO2,ATP6V0C,DDX3X,ADNP,TLE5,CTDNEP1,LGR4,AMOTL2,LDB1,TMEM9,LRP1,FBXW4,TGFB1,CAV1,CSNK1A1,NOTCH1,USP47,SDHAF2,LBX2,WNT7B,FZD1,WNK1,CSNK1E,LZTS2,BMAL1,UBR5,CSNK2A2,ABL1,CDH3,MKS1,WNT5B,JRK,CITED1,LRRK1,RARG,FOXD1,WNT10A,PBXIP1,MDK,CELSR2,WNT2B,CCAR2,SOX2,LMBR1L,ETV2,FZD2,TAX1BP3,RAB5A,FAM53B,CELSR1,BCL7B,TMEM198,DAB2IP,CHD8,ZNF703,CUL3,FZD4,CDC42,MED1…	c5_GO.Biological.Process
WP_OSTEOBLAST_DIFFERENTIATION_AND_RELATED_DISEASES	0.000121311	0.041731	0.538434	0.402982	1.9382	85	PIK3CD,BMP4,PRKCH,WNT5B,MAPK10,JAG1,BMPR1B,WNT10A,FGF5,FZD2,PRKCD,SOX9,MAPK8,WNT7B,JAG2,WNT9A,MAPK9,MAPK11,MAPK12,PRKCZ,BMPR2,RUNX2,PRKCG,FGFR2,PTCH1,MAPK3,PRKCA,PRKCE,PIK3R3,FGF2,WNT11,MAPK13,NOTCH1,MAPK6,NOTCH3,PRKCI,PIK3R2,WNT3A,HEY1,DLL4	c2_curated.Canonical.Pathways	0.0616725	0.421682	0.321776	0.263034	1.45597	93	NOTCH3,JAG2,BMPR1B,NOTCH1,PTCH1,WNT7B,FZD1,PRKCE,PIK3R2,WNT5B,MAPK11,MAPK12,WNT10A,FGFR4,WNT2B,FZD2,MAPK6,BMP4,PRKCD,FZD4,WNT11,SMO,WNT4,LRP5,MAPK9,SMAD1,MAPK14,DLL4,FZD9,FGF2,MAPK3,FGFR2,PRKCZ,FZD3,FGFR3,BMPR2	c2_curated.Canonical.Pathways
HDACs deacetylate histones; datasource: reactome;	0.000124893	0.0592694	0.518848	0.568021	2.10085	27	TBL1XR1,CHD3,MTA3,CHD4,BRMS1,MTA1,MTA2,HDAC10,ARID4B,HDAC2,GATAD2A,SAP30L,RCOR1,ARID4A,HMG20B	PathwayCommons11	0.0710173	0.583729	0.234393	0.347655	1.46074	30	MTA2,CHD3,CHD4,RCOR1,MTA3,HDAC10,HDAC8,GATAD2A,HDAC2,BRMS1,NCOR2	PathwayCommons11
GOBP_T_CELL_ACTIVATION	0.000127416	0.0103369	0.518848	0.27445	1.61242	348	BAD,CD247,MEN1,SMARCD2,FOSL2,PIK3CD,LYN,SMAD7,ZFP36L2,PTPN6,FLOT2,BMP4,AP3D1,STOML2,ACTB,ARG2,EGR1,BCL6,SMAD3,FUT7,SOX12,TGFB1,DHPS,RARA,SOS2,CYP26B1,JAK1,STK11,NRARP,SHB,CEBPB,RHOH,ABL1,KMT2A,AIRE,RUNX1,STAT6,CD27,CORO1A,JAG2,JUNB,ARID1B,TNFAIP8L2,CD151,FOXJ1,NFKBIZ,ARID1A,PPP3CA,KITLG,SOX13,SPI1,FOXP1,NCKAP1L,BAX,FOXP3,IL4I1,PRKCZ,ZEB1,PRKAR1A,ZBTB7B,EFNB3,TP53,ZFP36L1,TNFSF4,KAT5,IL1B,SMARCC1,…	c5_GO.Biological.Process	0.0905797	0.475715	0.199915	0.17105	1.17842	358	RBX1,RELB,PTPN6,BAD,JAG2,SMAD7,ZBTB7B,LAT,CEBPB,GSN,TCIRG1,FUT7,BAX,LOXL3,STAT6,KAT2A,TGFB1,TNFSF9,CAV1,TNFRSF13C,MARCHF7,CD4,PSMB10,DHPS,ACTB,HSPD1,AP3D1,MEN1,RASAL3,ABL1,FKBP1A,PIK3R2,CCDC88B,CARD11,XBP1,VAV1,MDK,JAK3,CASP3,DDOST,EFNB3,TP53,ZFPM1,LMBR1L,NCKAP1L,FCER1G,JMJD6,RASGRP1,NCAPH2,SLC11A1,BMP4,WAS,SMARCE1,NFKBID,ZEB1,NCSTN,PKNOX1,AMBRA1,STK11,FLOT2,PTPN11,CD47,WNT4,CD151,SOCS1,STAT5B,SM…	c5_GO.Biological.Process
GOBP_CELL_MOTILITY	0.00013039	0.0104669	0.518848	0.213536	1.38961	1186	QRICH2,AXL,TNFRSF18,MMRN2,DPEP1,RIN2,CLDN7,EVX1,ATP5F1B,MYO18A,EGFR,PIK3CD,MAZ,PLXNB2,LYN,TRIP6,PLEC,SGPL1,NFE2L2,C2CD6,SMAD7,SP1,PTK7,EFNA1,FSCN2,MIR200C,SEMA4B,BMP4,WNT5B,BTG1,CDKN1B,HOXB9,MIR196A1,RAC3,ACTB,NR4A2,MYLK,IGF1R,TMSB10,NSMF,CYP1B1,SCARB1,BCL6,MET,JAG1,PDGFA,HOXA7,RAB1A,SEMA3B,FUT4,HAS2,MIRLET7F1,EPS8,NF2,PML,SMAD3,FUT7,HOXA5,CSF2,TAOK2,MIR551A,STK24,LMO4,PLEKHG3,ITGB6,CXCR5,ZFAND5,…	c5_GO.Biological.Process	0.00317368	0.111093	0.431708	0.164715	1.27924	1201	TGFBR3L,AXL,DNAH2,PHPT1,FMNL3,MISP,DPCD,PKN1,PTK7,CXCL16,PAFAH1B1,GSK3A,MIR200C,MTA2,KNSTRN,FAM89B,CYGB,TCP11L2,GPC1,MIR149,TBC1D24,CEP131,FSCN2,SMAD7,ADCY3,RFFL,CLDN7,CORO6,RPS6KB1,NAV1,MIR497,HOXB9,MIR196A1,ARHGEF16,ZNF580,RADIL,FAM83D,AMOTL2,GAS6,MERTK,FUT7,CLN3,CTNNA1,ARID5B,CDC42BPA,BAX,LDB1,ATN1,SOD2,FOXC2,MMP2,AKIRIN1,HOXA5,HOXA7,LRP1,PEX13,TGFB1,F11R,CAV1,CCAR1,ACAP3,HDAC7,NOTCH1,ITGB2,PD…	c5_GO.Biological.Process
GOBP_RESPONSE_TO_EXTRACELLULAR_STIMULUS	0.000133759	0.0105233	0.518848	0.269609	1.60074	370	TBL1XR1,GABARAPL2,CYP27B1,AXL,ADM,MAPKAP1,GABARAP,SLC38A2,SIRT5,H6PD,USF2,LYN,PLEC,NFE2L2,ATG14,SP1,ERCC1,SESN1,NR4A2,IGF1R,CPT1A,CYP1B1,RMI1,RALB,STK24,FOXK2,USF1,MKKS,BRIP1,VDR,LAMTOR1,RARA,CYP26B1,GABARAPL1,SLC27A4,ULK1,WDR24,MAPK8,YWHAZ,KPTN,RELA,TNRC6A,SREBF1,FLCN,MDM2,RICTOR,CPEB4,NFKBIZ,SOD2,DSC2,CD68,ATN1,TSSK1B,ADSS1,BAX,GPT,ZEB1,BGLAP,RXRA,PRKAG1,TP53,GIPR,WDR59,RPTOR,PPP1R9B,KAT5,FOS,G…	c5_GO.Biological.Process	0.0110398	0.203222	0.38073	0.20144	1.39719	370	GABARAP,AXL,SIPA1,KPTN,CD68,SLC2A1,PRKAG1,ZFP36,ADNP,TLE5,EIF2A,RPS6KB1,CLEC16A,CTSK,SLC25A25,PAX2,OGG1,PPARA,GAS6,BAX,ATN1,SOD2,KAT2A,ABCA1,USF1,CSNK1A1,STC2,YWHAZ,GCLC,RNF167,RPTOR,A2M,LARP1,BECN1,TPCN2,YARS1,PRR5,XBP1,FOXK2,WNT2B,MKKS,STK24,SOX2,USF2,TP53,FGF21,NPRL3,ERCC1,RASGRP4,GNAI2,CREBBP,BBS2,MED1,ULK3,FNIP1,SLC39A5,NONO,RELA,ASNS,ZEB1,FOS,FOLR2,PSPH,CDKN2D,ATXN3,GAS2L1,COMT,AMBRA1,WNT11…	c5_GO.Biological.Process
GOBP_POSITIVE_REGULATION_OF_CARTILAGE_DEVELOPMENT	0.000133853	0.0105233	0.518848	0.61792	2.1365	22	SMAD7,BMP4,HOXA11,SMAD3,BMPR1B,BMP6,SOX6,SOX9,BMPR2,RUNX2,MDK	c5_GO.Biological.Process	0.193548	0.627401	0.140406	0.318013	1.21976	22	SMAD7,BMPR1B,MDK,BMP4,SOX6,BMP1,HOXA11,SMAD1	c5_GO.Biological.Process
GOBP_REGULATION_OF_EPITHELIAL_CELL_DIFFERENTIATION	0.000135889	0.0105744	0.518848	0.353573	1.81451	126	CYP27B1,BAD,TNFRSF1A,KEAP1,MIR200C,BMP4,PRKCH,BTG1,CDKN1B,JAG1,HOXA7,MIR99B,ETV4,F11R,VDR,BMP6,MACROH2A1,TP63,CEBPB,MIR29B1,SOX9,VEZF1,IKBKB,GRHL2,KRAS,SFN,FOXJ1,ZEB1,ESRP1,ETV2,CCND1,ADD1,NCOA3,ZFP36L1,RPTOR,NME2,MIR10A,IL1B,APOLD1,FOXN1,MYCL,PTCH1,EXTL3,FGF2,ZFP36,CD24	c5_GO.Biological.Process	0.00378539	0.11986	0.431708	0.289369	1.67481	115	CCND1,ETV4,MIR200C,SPRY1,BAD,ZFP36,MAFG,CEBPB,PAX2,ESRP1,MACROH2A1,HOXA7,F11R,CAV1,NOTCH1,SRSF6,PTCH1,RPTOR,LIF,EXTL3,MIR34A,GRHL2,ETV2,OVOL2,BMP4,MED1,SULT2B1,MIR99B,ZEB1,CD109,SMO,FOXC1,MIR29B1,STAT5B,ERRFI1,MIR10A,FGF2,CYP27B1,WWTR1,BMP7,SPRED2,ADD1,TNFRSF1A,PRKX,ZDHHC21,VDR,NME2,GRHL1,BTG1,PTCH2	c5_GO.Biological.Process
REACTOME_DEVELOPMENTAL_BIOLOGY	0.000136769	0.042986	0.518848	0.230992	1.47141	775	TBL1XR1,ADIRF,PAK6,MBP,NCOA6,CLDN7,EGFR,HOXA1,PIK3CD,SPTB,LYN,ARHGEF12,TBPL2,MED31,KDM5A,ZFP36L2,EFNA1,CACNB3,METTL23,ADAM11,BMP4,KRT18,KRT8,DKK1,ACTB,CAPN1,FAU,MET,KLK8,MED13,COL9A2,HOXA3,RPL4,PML,SMAD3,PKP1,HOXA4,H2AX,RPSA,HOXA2,RPL23A,TGFB1,PTK2,LAMC1,SPAG9,RARA,SOS2,CACNA1D,RPS6KA3,PSMB7,ACVR2B,RPL26,RPS26,RPS12,CHD9,CLASP1,CEBPB,RPL41,ABL1,RPS5,SOX9,KMT2A,MAPK8,KRT7,KRT86,CACNB4,SPTBN5,PCSK6…	c2_curated.Canonical.Pathways	5.46218e-05	0.00295192	0.557332	0.196275	1.46882	838	RBX1,PSMC3,FOXD3,KDM6B,DLG3,RPS5,EIF4A1,UHRF1,NR6A1,PSMB6,KAZN,KMT2D,ADAM11,GPC1,SHC1,NTN3,CLDN7,RPS15,CEBPB,RPS10,TUBB6,RPL23A,RPS28,UPF2,MED26,AGRN,PAX2,NRAS,EPHA10,PPARA,CTNNA1,MYL12B,TET3,LDB1,RPL36,FOXC2,MMP2,PCSK6,RPL13,HOXA3,HOXA4,RPL18,MAG,KAT2A,TGFB1,PSMD8,DOK4,ACVR2B,KRT15,KRT19,TBX6,NOTCH1,PSMD3,EIF4B,LHX3,CACNA1D,FARP2,ITGA10,RBM8A,PSMB10,MYC,ACTB,PIP5K1C,PRX,HOXD3,HOXD4,POLR2E,TRPC3,…	c2_curated.Canonical.Pathways
Deactivation of the beta-catenin transactivating complex; datasource: reactome;	0.000140423	0.0592694	0.518848	0.524527	2.07113	35	MEN1,CTBP1,BCL9L,CHD8,SOX6,SOX9,YWHAZ,UBC,PYGO2,SOX13,TLE1,TLE3,KMT2D,AKT2,TCF7	PathwayCommons11	0.0146812	0.564269	0.38073	0.378879	1.65603	34	KMT2D,CBY1,PYGO2,CTBP1,YWHAZ,MEN1,SOX2,UBC,AKT2,XPO1,CHD8,SOX6	PathwayCommons11
GOBP_MUSCLE_CELL_DIFFERENTIATION	0.000142926	0.0110096	0.518848	0.283847	1.63332	281	ADM,CAPN2,EHD1,PLEC,ID2,WFIKKN1,TNNT2,BMP4,WNT5B,CAPN3,KRT8,DKK1,EHD2,STAC3,EFEMP2,TGFB1,LAMC1,SPAG9,RARA,HDGFL2,CYP26B1,PIEZO1,BHLHE41,SOX6,TCAP,PRICKLE1,SOX9,CAV2,MRTFA,CACNB4,QKI,CFLAR,TBX2,MIR26A1,NFATC2,SLC9A1,CSRP1,KRAS,MDM2,SOD2,POPDC3,PPP3CA,LBX2,RGS2,FOXP1,MSX1,MAPK11,MAPK12,ZEB1,ZNHIT1,PRKAR1A,ANKRD23,SEMA4C,PTBP1,ANKRD17,CFL2,MEIS1,CNTNAP1,BMPR2,CACNA1H,MAMSTR,H3-3B,PDGFRA,TANC1,SRF,MI…	c5_GO.Biological.Process	0.0172316	0.246707	0.352488	0.210758	1.42099	287	KDM6B,DMPK,EHD1,WFIKKN1,GSK3A,MYMX,CBY1,MRTFB,MIR195,PPARA,LAMB2,RBM4,NFATC3,OBSCN,SOD2,NAGLU,KAT2A,TGFB1,KRT19,NOTCH1,ATP2A2,LBX2,ZBED6,RARB,WNT5B,MAPK11,MAPK12,HDGFL2,KRT8,XBP1,SIX4,OLFM2,CASP3,AKAP13,MIR34A,TBX2,CFL2,ANKRD23,SEMA4C,BMP4,LAMC1,PIEZO1,PTBP1,SOX6,TBX1,ZEB1,MEIS1,ADAMTS15,LDB3,SMO,WNT4,PTGFRN,STAC3,SMAD1,FBXO22,MAPK14,MECP2,ASF1A,TMOD4,YY1,CAV2,MIR140,ADPRHL1,TCAP,ADGRB1,FOXO4,MTL…	c5_GO.Biological.Process
GOBP_CELLULAR_RESPONSE_TO_HORMONE_STIMULUS	0.000145726	0.011113	0.518848	0.263673	1.58536	415	SCNN1A,CTSD,ZNF106,LYN,RHOQ,NFE2L2,SP1,ZFP36L2,TFAP4,FOSB,NR4A2,UFM1,IGF1R,SH2B2,NSMF,NR1D1,CYP1B1,FUT7,TNS2,DDX5,USF1,PTK2,MKKS,BRIP1,MBD5,RARA,SOS2,PMEPA1,JAK1,RAP1GDS1,PTGES3,PAQR7,TP63,BRCA1,PRKCD,SLC27A4,ESRRA,NR3C1,PKM,CAV2,TRIB3,THRB,CFLAR,ZBTB7A,SOCS2,STAT6,RELA,NEDD4,SLC9A1,SREBF1,VPS54,PTPN1,DDX17,ARID1B,MDM2,FBXO32,DDX54,PELP1,ARID1A,ATP1A1,PPP3CA,GRB7,SHC1,FOXP1,GPT,PRKCZ,BGLAP,GNB1,I…	c5_GO.Biological.Process	0.244328	0.66768	0.113313	0.152889	1.07727	432	NR3C1,ZBTB7A,SERPINB9,PKN1,GSK3A,INHBA,UBE2L3,KMT2D,SHC1,ZFP36,ZBTB7B,RPS6KB1,BRCA1,MIR195,PPARA,RBM4,TRIB3,FUT7,AGTRAP,FOXC2,STAT6,USF1,CAV1,VPS18,NOTCH1,LANCL2,RAMP1,GNRHR2,ZNF592,PAQR7,GCLC,FOSB,PRKCE,BMAL1,RARB,UBR5,NR1H3,PIK3R2,INSRR,PRCP,AGRP,ATP5F1A,RARG,XBP1,BCL2L11,JAK3,MKKS,MYO5A,FGF21,ATP1A3,SNX5,GNAI2,FOXA1,BBS2,AKT2,MED1,CNOT2,GRB7,FBXO32,NONO,RELA,SLC2A8,FOS,PRKCD,ADCY6,GAS2L1,SLC27…	c5_GO.Biological.Process
Wnt.Signaling	0.000146684	0.00243077	0.518848	0.392551	1.87123	90	TBL1XR1,MEN1,AMER1,WNT5B,DKK1,RAC3,MAPK10,SMAD3,H2AX,WNT10A,PSMB7,FZD2,SOX9,MAPK8,UBC,MYC,NFATC2,WNT7B,MAPK9,PPP3CA,JUN,KMT2D,TP53,PSMB2,CCND1,AKT2,TCF7,PRKCG,NFATC1,PRKCA,CCND2,GNG7,WNT11	NanoString_Genes	0.0100918	0.146332	0.38073	0.284645	1.5629	96	RBX1,CCND1,GNG7,KMT2D,GNG12,NFATC3,PSMB10,MYC,WNT7B,FZD1,H2AX,MEN1,WNT5B,WNT10A,WNT2B,SOX2,TP53,FZD2,UBC,CREBBP,AKT2,FZD4,WNT11,WNT4,LRP5,MAPK9,EP300,FZD9,SKP1,RAC1,PSMB5	NanoString_Genes
WP_ARYL_HYDROCARBON_RECEPTOR_PATHWAY_WP2873	0.000147679	0.042986	0.518848	0.556508	2.14335	30	EGFR,NFE2L2,CDKN1B,CYP1B1,TGFB1,AIP,PTGES3,AHRR,JUNB,BAX,JUN,IL1B	c2_curated.Canonical.Pathways	0.29249	0.702644	0.109684	0.256705	1.12243	36	ARNT,BAX,TGFB1,JUND,HSP90AA1,CDC37,PTGES3,EP300,AIP,POLK,NFE2L2,NCOA1,AHRR,CES3	c2_curated.Canonical.Pathways
GOBP_POSITIVE_REGULATION_OF_CHONDROCYTE_DIFFERENTIATION	0.000151477	0.0114373	0.518848	0.714376	2.14607	14	SMAD7,HOXA11,SMAD3,BMPR1B,BMP6,SOX6,SOX9,RUNX2	c5_GO.Biological.Process	0.52381	0.829539	0.0762797	0.282886	0.915446	13	SMAD7,BMPR1B,SOX6,HOXA11	c5_GO.Biological.Process
Activation of E2F1 target genes at G1/S; datasource: reactome;	0.000151664	0.0592694	0.518848	-0.560954	-2.14621	26	E2F1,CDC25A,RBL1,CDK1,FBXO5,TFDP1,TYMS,RRM2,ORC1,TFDP2,CDC6,POLA1	PathwayCommons11	0.000905726	0.371348	0.477271	-0.493621	-2.08187	29	FBXO5,TFDP2,CDC6,LIN54,CDC25A,CDK1,TFDP1,E2F5,DHFR,RBL1,CCNE1,RRM2,RBBP4,CDT1,TK1,PCNA,E2F6	PathwayCommons11
B cell activation; datasource: panther;	0.000162273	0.0592694	0.518848	0.481305	2.01217	46	PIK3CD,LYN,PTPN6,MAPK10,SOS2,PRKCD,MAPK8,NRAS,IKBKB,CD22,NFKBIA,MAPK9,PPP3CA,ITPR3,MAPK11,MAPK12,JUN,FOS,MAPK3,ITPR2,SYK,MAPK13	PathwayCommons11	0.227778	0.721304	0.122108	0.256081	1.17434	44	PTPN6,NRAS,MAPK11,MAPK12,VAV1,ITPR2,FOS,PRKCD,MAPK9,MAPK14,RAF1,CD79A,MAPK3,RAC1,BTK	PathwayCommons11
GOBP_POSITIVE_REGULATION_OF_MACROPHAGE_CHEMOTAXIS	0.000166058	0.0124152	0.518848	0.765305	2.1522	11	PTK2,C5AR1,CSF1,AKIRIN1,MDK,THBS1,MAPK3	c5_GO.Biological.Process	0.211382	0.639848	0.134273	0.415602	1.22217	10	AKIRIN1,MDK,IL34,MAPK3,CXCL17,MAPK1,CSF1	c5_GO.Biological.Process
Activation of rRNA Expression by ERCC6 (CSB) and EHMT2 (G9a); datasource: reactome;	0.000169687	0.0592694	0.518848	0.681235	2.11292	14	CHD3,MTA3,CHD4,MTA1,MTA2,CBX3,HDAC2,GATAD2A	PathwayCommons11	0.0381881	0.572801	0.321776	0.490374	1.59799	14	MTA2,CHD3,CHD4,MTA3,GATAD2A,HDAC2,CBX3,MTA1	PathwayCommons11
GOBP_APPENDAGE_MORPHOGENESIS	0.000176436	0.0130631	0.518848	0.36116	1.81069	112	TMEM231,IFT122,BMP4,DKK1,NPR2,TFAP2A,HOXA9,HOXA10,HOXA11,ECE1,CYP26B1,IFT140,PRICKLE1,TP63,RECK,SOX9,TBX2,GRHL2,VPS54,OSR2,HOXC10,MSX1,BAX,BAK1,HOXC11,RUNX2,RARG,EXT1,MAP3K20,NOG,WDPCP,FGFR2,PTCH1,HDAC2,SP9,SALL4,FBXW4,RDH10,NOTCH1,DLX6,NIPBL,MED1,MBNL1	c5_GO.Biological.Process	0.0357566	0.337509	0.321776	0.244011	1.42263	120	ECE1,TFAP2A,NPR2,BAX,ZNF358,FBXW4,NOTCH1,B9D1,PTCH1,RARB,HOXC11,MKS1,RARG,BCL2L11,GRHL2,SP9,TBX2,RDH10,CREBBP,BMP4,MED1,HOXC10,HOXA9,HOXA10,HOXA11,PLXNA2,TMEM107,LRP5,HOXD10,HOXD12,ZNF141,VPS54,HDAC2,CRABP2,MEGF8,NFIA,BMP7,LRP4,FGFR2,IQCE	c5_GO.Biological.Process
GOBP_POSITIVE_REGULATION_OF_MACROPHAGE_MIGRATION	0.000179254	0.0131441	0.518848	0.731776	2.12516	13	PTK2,P2RX4,C5AR1,CSF1,AKIRIN1,MDK,THBS1,MAPK3	c5_GO.Biological.Process	0.142857	0.573071	0.164406	0.421254	1.36322	13	AKIRIN1,MDK,CX3CL1,IL34,MAPK3,CXCL17,MMP14,MAPK1,CSF1	c5_GO.Biological.Process
Olfactory.receptors..family.52	0.000183904	0.0332925	0.518848	-0.926945	-1.98486	5	OR52N1,OR52E8,OR52E6,OR52N5,OR52H1	HUGO.Genes.groups	0.171315	0.723906	0.149208	-0.579254	-1.3034	5	OR52N1,OR52E8,OR52E6,OR52N5,OR52H1	HUGO.Genes.groups
MicroRNA.MIRLET7.family	0.00018513	0.0332925	0.518848	0.756793	2.11655	11	MIRLET7A1,MIRLET7D,MIRLET7F1,MIRLET7E,MIRLET7I,MIRLET7F2,MIR98	HUGO.Genes.groups	0.774067	0.967016	0.0566484	0.249807	0.749447	11	MIRLET7E,MIRLET7C,MIRLET7I,MIRLET7F2,MIR98,MIRLET7G,MIRLET7A1,MIRLET7D,MIRLET7F1,MIRLET7A3,MIRLET7B	HUGO.Genes.groups
GOBP_OSSIFICATION	0.000189394	0.0137554	0.518848	0.27298	1.58177	308	CYP27B1,BCOR,MEN1,FOSL2,ATP5F1B,EGFR,FSTL3,SMAD7,GLI1,MIR200C,BMP4,DKK1,BMP8B,NPR2,TFAP2A,JAG1,SMAD3,BMPR1B,HOXA2,DDX5,PTK2,ZHX3,ISG15,VDR,TUFT1,BMP6,ACVR2B,SATB2,PRICKLE1,TP63,CEBPB,NBR1,MIR29B1,SOX9,RUNX1,KREMEN2,DHRS3,WNT7B,JUNB,OSR2,SLC20A2,IFITM1,PPP3CA,ERCC2,MAPK11,SNX10,BGLAP,ECM1,CSF1,SIRT7,RFLNA,RXRA,SUN1,TP53INP2,BMPR2,RUNX2,MDK,ADCY10,H3-3B,EXT1,IL6R,LIMD1,ZBTB40,SYNCRIP,MIR24-1,ANO6,N…	c5_GO.Biological.Process	0.116814	0.534098	0.172324	0.172002	1.17734	311	MIR200C,ZBTB40,ISG15,SMAD7,SIRT7,ACHE,RPS15,FASN,CEBPB,BMPR1B,TCIRG1,NBR1,CTSK,TFAP2A,LGR4,NPR2,FOXC2,MMP2,ACVR2B,JUND,HDAC7,NOTCH1,PTCH1,WNT7B,FZD1,HSPE1,ADCY10,MEN1,SUN1,PLXNB1,MAPK11,CITED1,MDK,SOX2,ZHX3,DHH,PEX7,TUFT1,BMP4,RSL1D1,CLEC11A,NF1,CCDC154,FSTL3,BMP1,LRP3,INPPL1,RRAS2,WNT11,CCDC47,PTPN11,SMO,FOXC1,MIR9-1,MIR29B1,TPM4,WNT4,LRP5,EPHA2,SMAD1,MAPK14,ERCC2,ADAR,ASF1A,SND1,ATP5F1B,MYBBP1A…	c5_GO.Biological.Process
REACTOME_DEACTIVATION_OF_THE_BETA_CATENIN_TRANSACTIVATING_COMPLEX	0.000192268	0.045822	0.518848	0.524527	2.06195	35	MEN1,CTBP1,BCL9L,CHD8,SOX6,SOX9,YWHAZ,UBC,PYGO2,SOX13,TLE1,TLE3,KMT2D,AKT2,TCF7	c2_curated.Canonical.Pathways	0.0229358	0.270755	0.352488	0.378879	1.62326	34	KMT2D,CBY1,PYGO2,CTBP1,YWHAZ,MEN1,SOX2,UBC,AKT2,XPO1,CHD8,SOX6	c2_curated.Canonical.Pathways
GOBP_POSITIVE_REGULATION_OF_PHOSPHORYLATION	0.000195245	0.0139716	0.518848	0.252444	1.52894	450	BAD,AXL,TNFRSF18,MAP4K2,MAPKAP1,EGFR,TNFRSF1A,LYN,ATG14,EFNA1,BMP4,CDKN1B,DKK1,IL11,TRIM65,EGR1,IGF1R,HMGA2,MET,PDGFA,CLCF1,ZNF16,RALB,CSF2,TAOK2,LMO4,ERBB3,CAPRIN2,TGFB1,PTK2,TESK1,STK4,DAB2IP,BMP6,STK11,MOB3A,FGF5,PTGES3,CLN3,LRRK1,PRKCD,ATP2B4,ABL1,SOX9,UBE2K,EHD4,DVL1,DOK7,TRAF4,DLG4,RACK1,KRAS,BAG4,VEGFB,FLCN,PTPN1,TNIK,KCTD20,RICTOR,RAD50,KITLG,NCKAP1L,MAVS,SPHK1,IRS1,RB1CC1,CSF1,PRKAG1,TP5…	c5_GO.Biological.Process	0.00112278	0.0616395	0.45506	0.213962	1.52322	458	MAP2K7,DVL2,AXL,CCND1,DLG3,MAP3K11,GSK3A,INHBA,CACUL1,PRKAG1,TBK1,BAD,NIBAN1,DDX3X,ADNP,LAT,HCLS1,GAS6,MERTK,CLN3,CREBL2,IL11,HAX1,DOK7,TGFB1,CAV1,PDGFC,CD4,RPTOR,FZD1,LIF,ADCY10,ANG,EPHA4,MAP4K2,VEGFB,ABL1,INSRR,ARHGEF2,SNX9,PRR5,LRRK1,HSP90AA1,NTF3,UNC119,DGKZ,MST1R,HSP90AB1,FGFR4,PILRB,RAD50,TP53,MYDGF,TRAF4,EFNA1,FGF21,NCKAP1L,CDK2AP1,RASGRP1,MIR26B,SLC11A1,TNFRSF10A,TYRO3,BMP4,AKT2,FNIP1,AKA…	c5_GO.Biological.Process
GOBP_CELLULAR_RESPONSE_TO_PEPTIDE	0.000196035	0.0139716	0.518848	0.2823	1.61883	273	SCNN1A,CTSD,ZNF106,LYN,RHOQ,NFE2L2,SP1,NR4A2,IGF1R,NPR2,SH2B2,CYP1B1,MIRLET7F1,FUT7,TNS2,USF1,PTK2,BRIP1,MBD5,SOS2,JAK1,RAP1GDS1,PRKCD,SLC27A4,PKM,CAV2,TRIB3,CFLAR,SOCS2,STAT6,RELA,SLC9A1,SREBF1,PTPN1,ARID1B,MDM2,GRIN1,NOD1,PPP3CA,GRB7,SHC1,NGFR,GPT,PRKCZ,BGLAP,IRS1,PXN,NCOA5,ZNF592,PRKAR1A,ZBTB7B,TP53,ZFP36L1,PPP1R9B,IL1B,FOS,SMARCC1,BCAR1,EPHA4,CAPN10,TRIM41,AKT2,GCLC,NCOA2,MIR200A,ANO1,RAB10,N…	c5_GO.Biological.Process	0.320652	0.724792	0.09855	0.155978	1.04452	282	GSK3A,INHBA,SHC1,TRIM41,ZBTB7B,RPS6KB1,MIR195,RBM4,TRIB3,NPR2,ANO1,FUT7,AGTRAP,FOXC2,LRP1,STAT6,USF1,CAV1,GNRHR2,ZNF592,GCLC,CHMP5,BACE1,EPHA4,PIK3R2,INSRR,RPL23,ARHGEF2,XBP1,JAK3,TP53,MYO5A,FGF21,ATP1A3,SNX5,GNAI2,AKT2,GRB7,NONO,RELA,SLC2A8,FOS,PRKCD,ADCY6,CACNB1,SLC27A1,GJB2,PTPN11,UCP2,NCOA5,SOCS1,STAT5A,STAT5B,NGFR,OGT,RAF1,RHOQ,CAV2,MIR140,BRIP1,FOXO4,SOCS2,NTRK1,PXN,NFE2L2,MIR1271,SH2B2,NCO…	c5_GO.Biological.Process
WP_CORTICOTROPIN_RELEASING_HORMONE_SIGNALING_PATHWAY	0.00019662	0.045822	0.518848	0.430701	1.96564	65	FOSL2,SP1,FOSB,NR4A2,TFAP2A,ECE1,TGFB1,PTK2,PRKCD,GNAS,MAPK8,GRK6,RELA,NFKBIA,JUNB,MAPK9,GNB1,RAPGEF3,FOS,CACNA1H,NCOA2,GNB5,MAPK3,PRKCA,GNB2,RAF1,PRKCI,JUND,NR4A1,HSP90AA1,CREB1,GNAO1,GNB3,JUP,GNAI2,RHOA	c2_curated.Canonical.Pathways	0.365462	0.757854	0.0968878	0.198313	1.04163	70	ECE1,TFAP2A,TGFB1,JUND,FOSB,HSP90AA1,GNB2,CASP3,GNAS,GNAI2,RAPGEF3,RELA,FOS,PRKCD,MAPK9,MAPK14,RAF1,GRK6,BRAF,GNB5,MAPK3,CASP9	c2_curated.Canonical.Pathways
Muscarinic acetylcholine receptor 1 and 3 signaling pathway; datasource: panther;	0.000200141	0.0592694	0.518848	0.502087	2.00956	38	SNAP23,GNG8,PRKCH,GRIN2D,PRKCD,GRIN1,PKN2,ITPR3,PRKCZ,GNB1,STX1A,GNB5,PRKCG,PRKCA,PRKCE,GNG7,ITPR2,GNB2,GNG3,PRKCI,VAMP3,STX1B,GNB3,VAMP2,ACHE	PathwayCommons11	0.455744	0.872232	0.0808589	0.22	0.993492	42	PKN1,GNG7,ACHE,PRKCE,GNB2,GNG3,ITPR2,STX1B,PRKCD,CHRM1,GNG10,GNB5,PRKCZ,GNB3	PathwayCommons11
GOBP_REGULATION_OF_CELL_FATE_SPECIFICATION	0.000201928	0.0142584	0.518848	0.628475	2.15256	21	CHD3,MTA3,CHD4,DKK1,LMO4,MTA1,MTA2,ESRP1,FGF2,HDAC2,WNT11,GATAD2A	c5_GO.Biological.Process	0.0200583	0.262547	0.352488	0.442404	1.69687	22	MTA2,CHD3,CHD4,ESRP1,MTA3,GATAD2A,WNT11,LMO4,HDAC2,FGF2	c5_GO.Biological.Process
WP_NON_GENOMIC_ACTIONS_OF_1_25_DIHYDROXYVITAMIN_D3	0.000206502	0.045822	0.518848	0.457102	1.97398	52	CYP27B1,PLCB3,TNFRSF1A,SP1,PRKCH,ISG15,VDR,JAK1,PRKCD,MAPK8,NRAS,IKBKB,KRAS,MAPK9,MAPK11,MAPK12,PRKCZ,JUN,RXRA,PRKCG,MAPK3,PRKCA,PRKCE	c2_curated.Canonical.Pathways	0.199211	0.613194	0.13649	0.250086	1.19992	50	RELB,ISG15,PLCB3,NRAS,CAV1,PRKCE,MAPK11,MAPK12,NFKB2,CAMK2G,MED1,PRKCD,MAPK9,MAPK14,CYP27B1,MAPK3,PRKCZ,TNFRSF1A	c2_curated.Canonical.Pathways
GOBP_REGULATION_OF_CELL_ACTIVATION	0.000212312	0.014854	0.518848	0.254321	1.52833	410	BAD,AXL,SMARCD2,MYO18A,THBD,HAMP,LYN,ID2,SMAD7,ZFP36L2,PTPN6,FLOT2,BMP4,CAPN3,AP3D1,ACTB,ARG2,NR1D1,BCL6,PDGFA,CLCF1,MIR125A,LMO4,SOX12,TGFB1,F11R,DHPS,RARA,SOS2,CYP26B1,SHLD1,KLRD1,NRARP,SH2B3,EXOSC3,SHB,CEBPB,RHOH,PRKCD,KMT5B,ABL1,EMILIN1,RUNX1,KMT5C,STAT6,CD22,CD27,NFATC2,CORO1A,JUNB,ARID1B,TNFAIP8L2,FOXJ1,NFKBIZ,ARID1A,TNFSF13,PPP3CA,KITLG,STXBP1,SOX13,SPI1,NCKAP1L,FOXP3,IL4I1,PRKCZ,SPHK1,ZEB…	c5_GO.Biological.Process	0.0639033	0.421287	0.234393	0.173359	1.21683	411	AXL,BLOC1S3,PKN1,TNFSF13,PTPN6,KARS1,INHBA,CYGB,BAD,SMAD7,ZBTB7B,LAT,CEBPB,CD320,ALOX12,GAS6,MERTK,NECTIN2,LOXL3,SPHK2,STAT6,KAT2A,TGFB1,F11R,GP1BB,TNFSF9,CAV1,TNFRSF13C,MARCHF7,ITGB2,CD4,RABGEF1,DHPS,ACTB,GCLC,HSPD1,AP3D1,NR1H3,RASAL3,ABL1,CCDC88B,CARD11,XBP1,VAV1,MDK,JAK3,CASP3,HAMP,EFNB3,NCKAP1L,FCER1G,RASGRP1,TYRO3,BMP4,SMARCE1,RNF41,NEDD9,MIR125A,TYROBP,NFKBID,ZEB1,PRKCD,STXBP2,AMBRA1,CX3CL1…	c5_GO.Biological.Process
PI3K.Akt.Signaling	0.000214404	0.00310886	0.518848	0.33245	1.75085	155	BAD,EGFR,PIK3CD,EFNA1,CDKN1B,IGF1R,MET,PDGFA,ITGB6,SOS2,JAK1,STK11,FGF5,BRCA1,NRAS,RELA,IKBKB,MYC,MCL1,KRAS,VEGFB,MDM2,RICTOR,RBL2,KITLG,NGFR,IRS1,CSF1,CSF3R,TP53,CCND1,RPTOR,FGF17,PDGFRA,EPOR,AKT2,LAMB3,IL6R,ITGA1,THBS1,FGFR2,NTRK1,MAPK3,PRKCA,CCND2,LAMC3,GNG7,PIK3R3,FGF2,LAMC2,SYK,LAMA5,PRR5,HSP90B1	NanoString_Genes	0.0204885	0.237667	0.352488	0.229835	1.41229	164	MCL1,CCND1,GNG7,GNG12,BAD,RPS6KB1,BRCA1,NRAS,PDGFC,SGK2,ITGB4,CREB5,MYC,RPTOR,EPOR,CDK2,VEGFB,PIK3R2,PRR5,RBL2,NTF3,JAK3,FGFR4,TP53,EFNA1,FGF21,EIF4EBP1,AKT2,PGF,RELA,ITGA2B,STK11,PTPN11,EPHA2,NGFR,RAF1,CSF3R,ITGA3,FOXO4,ITGB8,TSC1,FGF2,FGF19,NTRK1,MAPK3,CASP9,RAC1,FGF22,FGFR2,EFNA3,PDGFA,COL4A5,ITGA5,FGFR3,COMP	NanoString_Genes
FOXA1 transcription factor network; datasource: pid;	0.000214741	0.0592694	0.518848	0.540689	2.07527	30	NRIP1,SP1,CDKN1B,CEBPB,BRCA1,ATP5PF,JUN,CCND1,NCOA3,FOS,PRDM15,POU2F1,NR2F2,NFIB,EP300,FOXA2,FOXA1	PathwayCommons11	0.0736434	0.590382	0.231127	0.347693	1.44538	29	CCND1,CEBPB,BRCA1,NDUFV3,XBP1,CREBBP,FOXA1,FOS,NFIC,EP300,NFIA	PathwayCommons11
PID_REG_GR_PATHWAY	0.000216058	0.045822	0.518848	0.426335	1.92239	63	MAPK10,EGR1,CSF2,KMT5B,SUMO2,NR3C1,MAPK8,RELA,SFN,MDM2,MAPK9,SPI1,BAX,MAPK11,BGLAP,JUN,TP53,FOS,SMARCC1,KRT17,PPP5C,POU2F1,NCOA2,NFATC1,MAPK3,HDAC2,SMARCC2,EP300,NR4A1,IL5,IRF1,HSP90AA1,CREB1,SMARCD1	c2_curated.Canonical.Pathways	0.195312	0.608622	0.137251	0.235717	1.19024	60	NR3C1,SUMO2,BAX,MAPK11,HSP90AA1,TP53,CREBBP,PPP5C,RELA,FOS,MAPK9,MAPK14,STAT5A,STAT5B,EP300,HDAC2,KMT5B,TBP,NCOA1,MAPK3	c2_curated.Canonical.Pathways
Apoptosis signaling pathway; datasource: panther;	0.000226219	0.0592694	0.518848	0.38264	1.86292	92	MAP4K2,PIK3CD,TNFRSF1A,PRKCH,MAPK10,PRKCD,MAPK8,CFLAR,RELA,IKBKB,NFKBIA,MCL1,BAG4,BAG3,MAPK9,BAX,BAK1,JUN,MAP4K4,TP53,ATF7,FOS,CASP8,AKT2,TNFRSF10D,ATF4,BCL2L10,CASP10,PRKCG,RIPK1,MAPK3,PRKCA,PRKCE,TMBIM6,ATF3,HSPA8,CRADD,MAP3K14,MAP2K7,EIF2AK2,APAF1,ENDOG,HSPA6,TRAF2,HSPA2,TNFRSF1B,FAS,MADD	PathwayCommons11	0.220974	0.719874	0.125033	0.211662	1.15381	92	MAP2K7,MCL1,RELB,TMBIM6,BAX,PRKCE,MADD,MAP4K2,NFKB2,BCL2L11,CASP3,TP53,TNFRSF10A,AKT2,RELA,FOS,PRKCD,TNFRSF10D,TRADD,MAPK9,HSPA8,BAG3,MAPK3,CASP9,BIK,ATF1,MAP2K4,TNFRSF1A,ATF4,DIABLO,MAP3K5	PathwayCommons11
REACTOME_G1_S_SPECIFIC_TRANSCRIPTION	0.000232628	0.045822	0.518848	-0.560954	-2.15859	26	E2F1,CDC25A,RBL1,CDK1,FBXO5,TFDP1,TYMS,RRM2,ORC1,TFDP2,CDC6,POLA1	c2_curated.Canonical.Pathways	0.000752553	0.0296553	0.477271	-0.493621	-2.01538	29	FBXO5,TFDP2,CDC6,LIN54,CDC25A,CDK1,TFDP1,E2F5,DHFR,RBL1,CCNE1,RRM2,RBBP4,CDT1,TK1,PCNA,E2F6	c2_curated.Canonical.Pathways
GOBP_CYTOKINE_MEDIATED_SIGNALING_PATHWAY	0.000239986	0.0166376	0.518848	0.274416	1.58959	307	BAD,AXL,TNFRSF18,TRAF1,TNFRSF1A,CACTIN,LYN,PTPN6,KRT18,KRT8,IL11,TRIM65,EGR1,SH2B2,CLCF1,MIRLET7A1,MIRLET7E,MIR125A,CSF2,CXCR5,MKKS,ISG15,JAK1,SH2B3,YTHDF2,ULK1,MIR29B1,TNFRSF25,UBE2K,STAT6,MIR26A1,RELA,IKBKB,NFKBIA,SHARPIN,PTPN1,IL11RA,IL1R1,NFKBIZ,TBKBP1,IFITM2,IFITM1,SPI1,NKIRAS1,MAVS,SPHK1,ECM1,NR1H2,CSF1,CSF3R,IL10RA,TP53,IL1B,GPR35,CCR10,TRIM41,CASP8,COMMD7,EPOR,EXT1,IL6R,RPS6KA4,MIR24-1,MI…	c5_GO.Biological.Process	0.00883032	0.185631	0.38073	0.208079	1.41622	302	AXL,IRF3,NKIRAS2,PAFAH1B1,PTPN6,SPPL2B,ISG15,INHBA,TBK1,BAD,TRIM41,RFFL,SPATA2,GAS6,SIGIRR,MIB2,IL11,STAT6,CAV1,TNFRSF13C,NOTCH1,CD4,RABGEF1,TNFRSF25,WNK1,EPOR,IL17RD,NR1H3,RPS6KA4,KRT18,KRT8,JAK3,MST1R,MKKS,MIR34A,TP53,CDC37,IL17RC,ZC3H15,DCST1,FCER1G,MIR152,BBS2,AGPAT2,MED1,CPNE1,MIRLET7E,MIR125A,SHARPIN,JAGN1,RELA,FZD4,CX3CL1,SLC27A1,PTPN11,FOXC1,MIR29B1,TBKBP1,TRADD,SOCS1,STAT5A,STAT5B,IRAK1,…	c5_GO.Biological.Process
GOBP_POSITIVE_REGULATION_OF_ENDOTHELIAL_CELL_PROLIFERATION	0.000243976	0.0167618	0.518848	0.400921	1.85501	73	PIK3CD,SP1,BMP4,POLD4,HSPG2,BMP6,MIR101-1,NRARP,PDCD6,MIR29A,CAV2,NRAS,VEGFB,RICTOR,TNFSF12,ECM1,PLXNB3,PRKD2,RPTOR,ANG,MIR10A,MDK,MIR27B,NRP1,PRKCA,FGF2,PDPK1,TGFBR1,ZNF580,MIR126,EGFL7,PDCL3,NR4A1,NF1,MIR135B	c5_GO.Biological.Process	0.0130338	0.216573	0.38073	0.290011	1.52464	77	ARNT,NRAS,ZNF580,PRKD2,RPTOR,MIR10B,ANG,VEGFB,MDK,TNFSF12,MYDGF,BMP4,PGF,JCAD,NF1,MIR29A,STAT5A,CAV2,GATA2,MIR10A,FGF2,ADAM17,MIR126,EGFL7,POLD4,PDCD6,HIF1A,HMOX1	c5_GO.Biological.Process
GOBP_EMBRYONIC_PROCESS_INVOLVED_IN_FEMALE_PREGNANCY	0.000246513	0.0167849	0.498493	0.873176	1.99785	6	TLE6,ACSL4,CITED2,JUNB	c5_GO.Biological.Process	0.505859	0.821494	0.0772747	-0.394655	-0.953264	6	JUNB,ACSL4,EMP2,CITED2	c5_GO.Biological.Process
WP_HIPPO_SIGNALING_REGULATION_PATHWAYS	0.000254858	0.045822	0.498493	0.422346	1.94147	67	PLCB3,EGFR,PRKCH,IGF1R,TEAD3,MET,NF2,SMAD3,CDH16,PRKCD,GNAS,GNAL,NGFR,PRKCZ,PRKAG1,PRKAR1A,CDH15,PDGFRA,TCF7,PRKCG,FGFR2,NTRK1,PRKCA,PRKCE,STK3,SMAD2,CDC42,PLCB2,WWTR1,PRKD3,TCF7L2,PRKCI,YAP1,CDH24,TEAD2,TEAD1,GNAI2,RHOA	c2_curated.Canonical.Pathways	0.505155	0.8262	0.0802023	0.183209	0.970424	73	CDH24,PRKAG1,PLCB3,PRKAR1B,PRKCE,CDH3,CDH16,FGFR4,GNAS,GNAL,GNAI2,PRKCD,CDC42,CDH1,EPHA2,NGFR,MST1,NTRK1,WWTR1,RAC1,FGFR2,PRKCZ,PRKAB2	c2_curated.Canonical.Pathways
KEGG_FC_EPSILON_RI_SIGNALING_PATHWAY	0.000258774	0.045822	0.498493	0.447359	1.96618	57	PIK3CD,LYN,RAC3,MAPK10,CSF2,SOS2,PRKCD,MAPK8,NRAS,KRAS,MAPK9,MAPK11,MAPK12,AKT2,MAPK3,PRKCA,PRKCE,PIK3R3,PDPK1,SYK,MAPK13,LAT,PLA2G4B,JMJD7-PLA2G4B,PLA2G2C,RAF1,PLA2G4E,IL5,PIK3R2,MAP2K7	c2_curated.Canonical.Pathways	0.09	0.480212	0.2114	0.278804	1.35406	52	MAP2K7,LAT,NRAS,PRKCE,PIK3R2,MAPK11,MAPK12,VAV1,FCER1G,AKT2,PRKCD,MAPK9,MAPK14,RAF1,GAB2,MAPK3,RAC1,BTK,MAP2K4,PIK3CD,PLA2G4B,JMJD7-PLA2G4B,MAP2K2,PDPK1	c2_curated.Canonical.Pathways
WP_LET_7_INHIBITION_OF_ES_CELL_REPROGRAMMING	0.00026563	0.045822	0.498493	0.732575	2.09317	12	EGR1,MIRLET7A1,MIRLET7D,MIRLET7F1,MIRLET7E,MIRLET7I,MYC,MIRLET7F2,SOX2	c2_curated.Canonical.Pathways	0.155512	0.572835	0.156312	0.420916	1.31129	12	MYC,SOX2,MIRLET7E,MIRLET7C,MIRLET7I,MIRLET7F2,EGR1,KLF4,MIRLET7G,MIRLET7A1,MIRLET7D,MIRLET7F1	c2_curated.Canonical.Pathways
WP_MECHANOREGULATION_AND_PATHOLOGY_OF_YAP_TAZ_VIA_HIPPO_AND_NON_HIPPO_MECHANISMS	0.000266407	0.045822	0.498493	0.519724	2.10646	39	MAP4K5,BUB1B-PAK6,PAK6,MAP4K2,ACTB,MAPK10,TEAD3,NF2,ITGB6,MAPK8,MAPK9,CTNNA1,SGMS1,MAP4K4,ITGB5,LIMD1,YWHAQ,STK3,PAK5,WWTR1,YAP1,TEAD2,TEAD1,ITGB4,ITGB3	c2_curated.Canonical.Pathways	0.184676	0.602803	0.142057	0.275076	1.22976	39	CTNNA1,ITGB2,ITGB4,ACTB,MAP4K2,BUB1B-PAK6,PAK6,CDH1,MAPK9,ITGB8,MST1,WWTR1,ITGB5,MAP4K5,LIMD1,MAP4K3,STK3,TEAD3,TEAD1	c2_curated.Canonical.Pathways
GOBP_REGULATION_OF_PROTEIN_MODIFICATION_PROCESS	0.000268655	0.0180742	0.498493	0.218181	1.40169	976	TNFRSF18,MEN1,MAP4K2,HEXIM1,CHFR,MAPKAP1,PTPA,GABARAP,BAZ2A,EGFR,SAE1,TNFRSF1A,CACTIN,AMER1,PLXNB2,LYN,PARP10,ATG14,SMAD7,TFAP4,EFNA1,PTPN6,BMP4,CAPN3,TRABD2B,CDKN1B,DKK1,CENPX,ACTB,INAVA,PTPN13,IL11,TRIM65,EGR1,BAZ1B,TRABD2A,AKT1S1,NSMF,HMGA2,NOP53,PHF23,CBLC,PDGFA,FNTA,SET,CLCF1,NF2,PML,RALB,ABCA2,CSF2,TAOK2,ERBB3,FKBP8,CAPRIN2,TGFB1,NOS1AP,PTK2,TESK1,ISG15,SPAG9,STK4,MIR15A,DAB2IP,BMP6,PPP1R1B…	c5_GO.Biological.Process	3.94327e-06	0.00167173	0.610527	0.203623	1.55189	986	RBX1,MAP2K7,GABARAP,DVL2,PHF23,CCND1,DLG3,MAP3K11,PKN1,GSK3A,PTPN6,ISG15,TERF2IP,INHBA,UBE2L3,SPRY1,CACUL1,PRKAG1,TBK1,GOLGA2,FZR1,NIBAN1,TBC1D24,SMAD7,DDX3X,UBXN1,SIRT7,ADNP,LAT,HCLS1,NDUFS4,INCA1,BRCA1,TPPP,ARNT,CHFR,PPP6R2,FKBP8,U2AF2,TRIB3,KAT14,GAS6,CTDSP2,CLN3,PRDM12,CREBL2,IL11,HAX1,DOK7,HEXIM1,BAX,MACROH2A1,CHMP6,CCNF,PRKAR1B,KAT2A,ZFYVE28,TGFB1,CAV1,CCNT1,BAZ1B,MARCHF7,NSD1,ITGB2,PDGFC,N…	c5_GO.Biological.Process
GOBP_LYMPHOCYTE_ACTIVATION	0.000270455	0.0180742	0.498493	0.24562	1.50491	515	BAD,AXL,CD247,MEN1,SMARCD2,FOSL2,PIK3CD,LYN,ID2,SMAD7,ZFP36L2,ERCC1,PTPN6,FLOT2,BMP4,AP3D1,STOML2,ACTB,ARG2,IL11,EGR1,SYVN1,BCL6,CLCF1,SMAD3,FUT7,SOX12,CXCR5,TGFB1,IRF2BP2,DHPS,RARA,SOS2,CYP26B1,JAK1,STK11,SHLD1,KLRD1,NRARP,EXOSC3,SHB,CEBPB,RHOH,PRKCD,KMT5B,ABL1,KMT2A,ZBTB7A,AIRE,RUNX1,KMT5C,STAT6,CD22,CD27,NFATC2,CORO1A,JAG2,JUNB,ARID1B,PRDX1,TNFAIP8L2,CD151,FOXJ1,NFKBIZ,ARID1A,TNFSF13,PPP3CA,KI…	c5_GO.Biological.Process	0.0502513	0.395415	0.261664	0.171824	1.23701	516	RBX1,AXL,RELB,ZBTB7A,BLOC1S3,PKN1,TNFSF13,PTPN6,INHBA,BAD,JAG2,SMAD7,ZBTB7B,LAT,CEBPB,GSN,CD320,TCIRG1,GAS6,MERTK,FUT7,IL11,BAX,LOXL3,CEBPG,STAT6,KAT2A,TGFB1,TNFSF9,CAV1,C17orf99,TNFRSF13C,MARCHF7,CD4,RNF168,PSMB10,DHPS,ACTB,IMPDH2,HSPD1,AP3D1,MEN1,RASAL3,ABL1,FKBP1A,PIK3R2,CCDC88B,CARD11,SWAP70,XBP1,VAV1,MDK,JAK3,CASP3,DDOST,LYL1,EFNB3,TP53,ZFPM1,LMBR1L,NCKAP1L,BST2,FCER1G,ERCC1,JMJD6,RASGRP1,NC…	c5_GO.Biological.Process
GOBP_POSITIVE_REGULATION_OF_VASCULATURE_DEVELOPMENT	0.000272558	0.0180742	0.498493	0.353515	1.80413	121	ADM,ADM2,PIK3CD,NFE2L2,SP1,BTG1,HMGA2,CYP1B1,DDAH1,MIR125A,MIR99B,JAK1,PDCD6,BRCA1,C5AR1,ABL1,PKM,MIR29A,JMJD8,EMILIN1,RUNX1,VEGFB,TNFSF12,SPHK1,ECM1,PRKD2,RAPGEF3,IL1B,SASH1,MDK,ERAP1,MIR27B,THBS1,HIPK2,NRP1,PRKCA,FGF2,ENG,PDPK1,WNK1,RRAS	c5_GO.Biological.Process	0.625523	0.867412	0.0699459	-0.155487	-0.917463	122	MIR27B,PTK2B,MIR92A1,MIR20A,MIR21,ITGB1,MIR181B1,VASH2,WNT5A,MIR30B,ETS1,PDCL3,VEGFD,MIR30A,HYAL1,GRN,MIR378A,HMGA2,CYP1B1,PRKCA,JUP,PRKD1,HIPK1,MTDH,FLT1,HK2,THBS1,CYBB	c5_GO.Biological.Process
GOBP_PROSTATE_GLAND_DEVELOPMENT	0.000280165	0.0183484	0.498493	0.51004	1.98362	36	GLI1,BMP4,CDKN1B,HOXA9,HOXA10,HOXA11,CRIP1,RARA,STK11,TP63,SOX9,SMARCC1,RARG,NOG,FGFR2,PTCH1,NOTCH1,TNC,MMP2,FOXA1	c5_GO.Biological.Process	0.180747	0.61084	0.143759	0.27205	1.21151	36	MMP2,NOTCH1,PTCH1,RARG,FOXA1,BMP4,WDR77,HOXA9,HOXA10,HOXA11,STK11,BMP7,FRS2,FGFR2	c5_GO.Biological.Process
GOBP_MYELOID_CELL_HOMEOSTASIS	0.000281506	0.0183484	0.498493	0.342121	1.77255	138	AXL,PIK3CD,HAMP,SLC1A5,LYN,MAEA,ID2,BMP4,HOXB6,BCL6,ZNF16,HOXA5,ISG15,CITED2,SH2B3,KMT2E,CFLAR,ZBTB7A,SMAP1,P4HTM,PRDX1,KITLG,SPI1,ERCC2,NCKAP1L,BAX,FOXP3,MAPK11,BAK1,CSF1,RACGAP1,ETV2,ZFP36L1,DMTN,PKNOX1,CDIN1,SRF,PTBP3,HIPK2,HCLS1,CEBPG,ACVR1B,ZFP36,RCOR1,ACVR2A,HSPA9,ARID4A,PRMT1,TGFBR3,MED1,SLC25A5,NF1,ITPKB,ACIN1	c5_GO.Biological.Process	0.00216073	0.0919096	0.431708	0.273133	1.64332	140	SLC1A5,AXL,ZBTB7A,PRMT1,ACIN1,ISG15,INHBA,ZFP36,HCLS1,ARNT,HOXB6,MERTK,BAX,LDB1,MAEA,RCOR1,HOXA5,CEBPG,MAPK11,BCL2L11,CASP3,HAMP,ZFPM1,ETV2,NCKAP1L,BRD1,XKR8,JMJD6,BMP4,MED1,NF1,NCAPG2,NCSTN,PKNOX1,MAPK14,STAT5B,ERCC2,ADAR	c5_GO.Biological.Process
GOBP_COCHLEA_MORPHOGENESIS	0.000284227	0.0183688	0.498493	0.665843	2.07545	16	HOXA1,PTK7,FZD2,SOX9,GRHL3,DVL1,TBX2,ZEB1	c5_GO.Biological.Process	0.00102586	0.0573512	0.45506	0.639662	2.11181	14	DVL2,PTK7,PAX2,HOXA1,TBX2,FZD2,TBX1,ZEB1	c5_GO.Biological.Process
GOBP_NEGATIVE_REGULATION_OF_GENE_EXPRESSION	0.000290085	0.0185898	0.498493	0.21269	1.37417	1054	AXL,MIR190A,UBR2,SMG7,MIR192,MIR194-2,BAZ2A,TSKU,INPP5E,CACTIN,SERBP1,NOL3,SRRT,MIR661,PARP10,ID2,KDM5A,ANXA4,SMAD7,ZFP36L2,TFAP4,CHD4,MIR141,MIR200C,PTPN6,FLOT2,MIR636,MIR3619,MIRLET7BHG,BMP4,MIR196A1,SMCHD1,ARG2,TASOR,CIRBP,HMGA2,MIR196B,HOXA10-AS,BCL6,HNRNPK,MIR7-1,PIWIL4,MIRLET7A1,MIRLET7D,MIRLET7F1,MIRLET7E,MIR125A,MIR99B,PML,SMAD3,PKP1,MIR551A,DDX5,CAPRIN2,MOV10,TGFB1,MIR556,MIR151A,MKKS,BR…	c5_GO.Biological.Process	0.00195566	0.0875224	0.431708	0.175035	1.34193	1056	RBX1,AXL,EDC4,RELB,TDRKH,BCL2L12,TMBIM6,MIR192,MIR194-2,CAPRIN1,TNRC6B,USP7,GSK3A,MIR141,MIR200C,PTPN6,TUT1,INHBA,UHRF1,KMT2D,MOV10,TBK1,MIR149,SMAD7,ZFP36,DDX3X,SIRT7,ADNP,ZBTB7B,TLE5,SAMD4A,PTBP2,CHD4,UPF2,BRCA1,MIR195,MIR497,MIR196A1,MIR3619,MIRLET7BHG,CSDE1,PPARA,U2AF2,CIRBP,RBM4,LGR4,GAS6,MIR455,MIR26A2,MERTK,SIGIRR,MIR203A,MIR671,MACROH2A1,RCOR1,LRP1,PUS10,TGFB1,HDAC7,NOTCH1,ZHX2,MIR938,MIR…	c5_GO.Biological.Process
GOBP_POSITIVE_REGULATION_OF_PHOSPHORUS_METABOLIC_PROCESS	0.000298499	0.0189696	0.498493	0.244437	1.4896	488	BAD,AXL,TNFRSF18,MAP4K2,CAPN2,MAPKAP1,PTPA,EGFR,TNFRSF1A,LYN,ATG14,EFNA1,BMP4,CDKN1B,DKK1,IL11,TRIM65,EGR1,IGF1R,NSMF,HMGA2,MET,PDGFA,CLCF1,ZNF16,RALB,CSF2,TAOK2,LMO4,ERBB3,CAPRIN2,TGFB1,PTK2,TESK1,STK4,DAB2IP,BMP6,STK11,MOB3A,FGF5,PTGES3,CLN3,LRRK1,PRKCD,ATP2B4,ABL1,SOX9,UBE2K,EHD4,DVL1,DOK7,TRAF4,DLG4,RACK1,KRAS,BAG4,VEGFB,FLCN,PTPN1,TNIK,KCTD20,RICTOR,RAD50,KITLG,NCKAP1L,MAVS,SPHK1,IRS1,RB1CC1…	c5_GO.Biological.Process	0.00118272	0.0635588	0.45506	0.20651	1.48254	495	MAP2K7,DVL2,AXL,CCND1,DLG3,MAP3K11,GSK3A,INHBA,CACUL1,PRKAG1,TBK1,BAD,NIBAN1,DDX3X,ADNP,LAT,HCLS1,PPARA,GAS6,MERTK,CLN3,CREBL2,IL11,HAX1,DOK7,TGFB1,CAV1,PDGFC,CD4,RPTOR,FZD1,LIF,NOS2,ADCY10,ANG,EPHA4,MAP4K2,VEGFB,ABL1,INSRR,ARHGEF2,PTPA,SNX9,PRR5,LRRK1,HSP90AA1,NTF3,UNC119,DGKZ,MST1R,HSP90AB1,FGFR4,PILRB,RAD50,TP53,MYDGF,TRAF4,EFNA1,FGF21,NCKAP1L,CDK2AP1,RASGRP1,MIR26B,SLC11A1,TNFRSF10A,TYRO3,BMP…	c5_GO.Biological.Process
GOBP_NEGATIVE_REGULATION_OF_MULTICELLULAR_ORGANISMAL_PROCESS	0.000302805	0.0190842	0.498493	0.224407	1.41913	795	GPR137,AXL,MMRN2,BCOR,ADM,MIR192,TSKU,EGFR,THBD,GLRX3,TNFRSF1A,CACTIN,HAMP,LYN,FSTL3,ID2,ANXA4,SMAD7,EFNA1,MIR200C,PTPN6,ANXA2,SEMA4B,BMP4,CDKN1B,MIR196A1,DKK1,ARG2,PTPN13,NR1D1,BCL6,PDGFA,HOOK3,HOXA7,SEMA3B,MIRLET7F1,NF2,MIR125A,PML,SMAD3,HSPG2,HOXA5,TGFB1,RTN4R,USF1,STK4,GTF2I,RARA,CITED2,MIR15A,MIR16-1,DAB2IP,SOX6,MIR101-1,ACVR2B,STK11,NRARP,PRICKLE1,SH2B3,TP63,P2RX4,CEBPB,PRKCD,ATP2B4,ULK1,MI…	c5_GO.Biological.Process	0.0365442	0.340084	0.321776	0.1637	1.22338	797	RBX1,AXL,RELB,MIR192,PKN1,GSK3A,MIR200C,PTPN6,INHBA,SPRY1,CYGB,GPR137,MIR149,SMAD7,ZFP36,ZBTB7B,CEBPB,ALOX12,MIR195,MIR497,CTSK,MIR196A1,PAX2,PPARA,LGR4,ADGRB2,GAS6,MERTK,SIGIRR,MIR203A,CTNNA1,FOXC2,LOXL3,MMP2,HOXA5,HOXA7,MAG,TGFB1,USF1,ACVR2B,MARCHF7,HDAC7,NOTCH1,STC2,SRSF6,DNAJB11,PTCH1,RABGEF1,ATP2A2,SDHAF2,MYC,GCLC,MIR15A,MIR16-1,BCL11A,WNK1,ADCY10,BMAL1,EPHA4,IL17RD,RARB,MIR338,MIR657,NR1H3,…	c5_GO.Biological.Process
GOBP_MORPHOGENESIS_OF_AN_EPITHELIUM	0.000306326	0.0191479	0.498493	0.261033	1.54628	375	MMRN2,ADM,IFT122,EGFR,PIK3CD,PLXNB2,PTK7,BMP4,WNT5B,HOXB7,DKK1,ACTB,TFAP2A,HOXA11,MET,JAG1,PDGFA,PML,SMAD3,HOXA5,LMO4,TGFB1I1,GZF1,WNT10A,TGFB1,MKKS,VDR,STK4,RARA,CITED2,MIR16-1,TCAP,FZD2,NRARP,PRICKLE1,FOXE1,TP63,CLASP1,MYO9A,CELSR2,ALDH1A3,ABL1,NR3C1,SOX9,MRTFA,GRHL3,DVL1,AIRE,TBX2,MYC,GRHL2,LUZP1,WNT7B,JAG2,KRAS,KDM5B,NKX2-1,CD151,LBX2,KIF20B,NGFR,FOXP1,TBX6,LZTS2,SOSTDC1,DACT1,CSF1,PLOD3,AJUB…	c5_GO.Biological.Process	0.00217265	0.0919096	0.431708	0.210934	1.46986	391	DVL2,NR3C1,DLG3,PTK7,PAFAH1B1,SPRY1,CLUAP1,JAG2,CECR2,TFAP2A,HOXB7,PAX2,LGR4,FOXC2,NAGLU,MMP2,HOXA5,KAT2A,TGFB1,TBX6,NOTCH1,SOX18,PRKD2,CRYGS,PTCH1,MYC,ACTB,LBX2,WNT7B,FZD1,LIF,MIR16-1,PLXNB2,LZTS2,EPHA4,TMEM59L,PFN1,ABL1,MKS1,WNT5B,FOXE1,CITED1,ALDH1A3,RARG,FOXD1,WNT10A,MDK,CELSR2,SIX4,CASP3,WNT2B,MKKS,GRHL2,TBX2,RDH10,FZD2,OVOL2,VASP,KDM2B,FOXA1,SEMA4C,BMP4,MED1,CELSR1,HOXA11,CDC42,SETDB2,MED12…	c5_GO.Biological.Process
GOBP_RESPONSE_TO_CYTOKINE	0.000325418	0.0201759	0.498493	0.235148	1.46014	612	CYP27B1,BAD,AXL,TIMP2,TNFRSF18,TRAF1,CAPN2,FOSL2,ATP5F1B,TNFRSF1A,CACTIN,LYN,KEAP1,NFE2L2,SMAD7,ZFP36L2,PTPN6,KRT18,KRT8,IL11,TRIM65,EGR1,NPR2,SH2B2,NR1D1,CYP1B1,SKIL,CLCF1,HAS2,MIRLET7A1,EPS8,MIRLET7E,MIR125A,PML,CSF2,CXCR5,MKKS,ISG15,RARA,DAB2IP,JAK1,MIR101-1,SH2B3,GBP6,BRCA1,YTHDF2,ULK1,MIR29B1,SOX9,TNFRSF25,CACNB4,UBE2K,STAT6,MIR26A1,RELA,IKBKB,MIR324,GFPT2,NFKBIA,MCL1,GAPDH,CORO1A,SHARPIN,YB…	c5_GO.Biological.Process	0.00162678	0.0766337	0.45506	0.193411	1.41471	604	MAP2K7,MCL1,AXL,RELB,IRF3,NKIRAS2,NFAT5,CXCL16,PAFAH1B1,GSK3A,PTPN6,SPPL2B,ISG15,INHBA,TBK1,BAD,MIR149,SMAD7,TRIM41,ZFP36,RFFL,SPATA2,HCLS1,TLE5,FASN,GSN,TCIRG1,RPS6KB1,BRCA1,CIITA,CTSK,GAS6,NPR2,MIR455,SIGIRR,MIB2,IL11,HAX1,ARID5B,HTRA2,MMP2,STAT6,KAT2A,ABCA1,CAV1,BCAT2,TNFRSF13C,NOTCH1,CD4,PDE2A,RABGEF1,GCLC,IMPDH2,TNFRSF25,WNK1,HSPD1,EPOR,NOS2,IL17RD,NR1H3,RPS6KA4,ARHGEF2,DUSP1,CTBP2,MAPK11,CI…	c5_GO.Biological.Process
Myeloid.Inflammation	0.000333536	0.00429891	0.498493	0.400767	1.86824	79	PIK3CD,LYN,RAC3,MAPK10,CSF2,SOS2,PSMB7,MAPK8,UBC,NRAS,RELA,IKBKB,NFATC2,NFKBIA,KRAS,MAPK9,CIC,PPP3CA,MAPK11,MAPK12,JUN,PSMB2,FOS,AKT2,NFATC1,MAPK3,PRKCA,PIK3R3,SYK,LAT,PSMB10,RAF1,PLA2G4E,IL5,PIK3R2,TXK	NanoString_Genes	0.0436777	0.316663	0.321776	0.267575	1.41393	78	PLA2G4C,LAT,NRAS,NFATC3,PSMB10,RASGRP2,PIK3R2,CARD11,MAPK11,MAPK12,FCER1G,GMIP,UBC,RASGRP1,AKT2,RELA,FOS,MAPK9,MAPK14,RAF1,SKP1,MAPK3,RAC1,PSMB5,BTK,MAP2K4	NanoString_Genes
TGF-beta signaling pathway; datasource: panther;	0.000333536	0.0678672	0.498493	0.405059	1.87712	72	SMAD7,INHBC,INHBE,BMP4,BMP8B,MAPK10,SKIL,SMAD3,BMPR1B,CITED2,BMP6,ACVR2B,MAPK8,NRAS,FKBP2,JUNB,MAPK9,MAPK11,MAPK12,JUN,ZFYVE16,BMPR2,MAPK3,ACVR1B,MAPK13,ACVR2A,RRAS,TGFBR1,SMAD2,FKBP1A,LEFTY1,JUND,EP300	PathwayCommons11	0.000715765	0.371348	0.477271	0.365326	1.8837	71	FKBP2,INHBA,SMAD7,BMPR1B,NRAS,ACVR2B,JUND,FKBP1A,MAPK11,MAPK12,CITED1,CREBBP,BMP4,RRAS,BMP1,MAPK9,SMAD1,MAPK14,TGFBR2,EP300,BMP7,MAPK3,SMAD6,SKIL,ACVR1B,BMPR2,TAB1,LEFTY1,SMAD5,TGFB3	PathwayCommons11
Regulation of nuclear beta catenin signaling and target gene transcription; datasource: pid;	0.000341958	0.0678672	0.498493	0.44329	1.94139	56	TBL1XR1,CTBP1,ID2,DKK1,CHD8,YWHAZ,MYC,SFN,TNIK,TLE1,JUN,CCND1,TCF7,NCOA2,ADCY7,YWHAG,CCND2,HDAC2,SALL4,YWHAQ,MMP2,TCF7L2,EP300	PathwayCommons11	0.177449	0.665114	0.140406	0.250533	1.22089	56	CCND1,RUVBL2,CBY1,CTBP1,MMP2,YWHAZ,MYC,ADCY7,XPO1,CHD8,MED12,CDH1,SP5,EP300,HDAC2,SKP1	PathwayCommons11
GOBP_CELLULAR_RESPONSE_TO_MECHANICAL_STIMULUS	0.00034334	0.0209347	0.498493	0.450576	1.97317	56	BAD,KCNK4,LTBR,SLC38A2,TNFRSF1A,PLEC,TMEM87A,IGF1R,F11R,PIEZO1,BMP6,SOX9,MAPK8,SLC9A1,BAG3,BAK1,CNN2,IL1B,CASP8,GCLC,MAPK3,FGF2,WNT11,ENG	c5_GO.Biological.Process	0.150391	0.579673	0.158514	0.260797	1.26398	52	SLC2A1,BAD,KCNK4,MAG,F11R,PDE2A,GCLC,CNN2,HABP4,TNFRSF10A,PIEZO1,WNT11,SLC38A2,LTBR,FGF2,BAG3,MAPK3,MAP2K4,TNFRSF1A,SLC9A1,CHEK1	c5_GO.Biological.Process
GOBP_EXTRACELLULAR_MATRIX_ASSEMBLY	0.000344663	0.0209347	0.498493	0.519507	1.9802	33	PHLDB1,FBLN5,THSD4,HAS2,SMAD3,EFEMP2,TGFB1,PRICKLE1,CLASP1,MIR29B1,SOX9,EMILIN1,FKBP10,PLOD3,MIR27B,MIR98,TGFBR1,NOTCH1,NTN4,HAS1	c5_GO.Biological.Process	0.45328	0.799765	0.0840746	0.22578	0.9857	34	FKBP10,GAS6,TGFB1,ELN,NOTCH1,PHLDB1,MIR9-1,MIR29B1,HAS1,EFEMP2,LOX	c5_GO.Biological.Process
GOBP_EYELID_DEVELOPMENT_IN_CAMERA_TYPE_EYE	0.000345892	0.0209347	0.498493	0.746425	2.0991	11	EGFR,TFAP2A,PRICKLE1,GRHL3,OSR2,SRF,HDAC2	c5_GO.Biological.Process	0.253937	0.678041	0.118815	-0.387288	-1.17247	11	EGFR,PRICKLE1,SOS1	c5_GO.Biological.Process
Alzheimer disease-amyloid secretase pathway; datasource: panther;	0.000351099	0.0678672	0.498493	0.467022	1.96345	47	KLC4,PRKCH,MAPK10,CACNA1D,PRKCD,MAPK8,PCSK6,MAPK9,PKN2,PCSK4,MAPK11,MAPK12,PRKCZ,APH1B,KAT5,PRKCG,MAPK3,PRKCA,PRKCE,MAPK13,MAPK6,PRKCI	PathwayCommons11	0.000183028	0.279086	0.518848	0.440447	2.08966	50	PKN1,KLC4,PCSK6,CACNA1D,KLC2,PRKCE,KLC1,BACE1,MAPK11,MAPK12,MAPK6,PRKCD,PCSK4,NCSTN,CHRM1,CACNB1,MAPK9,MAPK14,APBA3,ADAM10,ADAM17,MAPK3,PRKCZ,KAT5	PathwayCommons11
GOBP_CELL_MORPHOGENESIS	0.000362595	0.0217728	0.498493	0.231568	1.45118	677	CDC42EP3,PAK6,METRN,NKX2-8,FOSL2,EVX1,TSKU,SEPTIN7,EGFR,PLXNB2,PLEC,RHOQ,CUL7,PTK7,EFNA1,PTPN6,FGD3,FGD2,SEMA4B,DKK1,RAC3,ACTB,NR4A2,SPAST,APLP2,IGF1R,NPR2,BCL9L,CUX1,NSMF,BCL6,ECE1,MET,KLK8,ISLR2,SKIL,SEMA3B,EPS8,NF2,TAOK2,CAMSAP1,CFDP1,LMO4,BMPR1B,ITGB6,FRMD6,NYAP1,HOXA2,CAPRIN2,MOV10,RTN4R,SCFD1,F11R,PTK2,VDR,SPAG9,STK4,RND2,FAT3,DAB2IP,FOXB1,STK11,PRICKLE1,MYO9A,CELSR2,NTNG2,TIAM2,YTHDF2,SIPA…	c5_GO.Biological.Process	0.00714542	0.169865	0.407018	0.180073	1.33071	715	DVL2,WEE1,FMNL3,CAPRIN1,PALM,SIPA1,ATP9A,CUL7,PTK7,PAFAH1B1,CDH24,PTPN6,FGD1,METRN,CFDP1,MOV10,NOTCH3,NTN3,TBC1D24,ADNP,ECE1,TPRN,BMPR1B,UST,PAX2,CPNE9,EPHA10,LAMB2,NPR2,SART3,COL27A1,ANO1,PACSIN2,MYL12B,WASF1,C12orf57,CDC42EP3,FLRT1,MAG,F11R,ZMYM4,NOTCH1,ITGB2,CNP,NPTX1,LHX3,CDC42EP1,ZNF385A,TBCCD1,PTCH1,PSMB10,IST1,ACTB,WNT7B,LIF,RAB25,BCL11A,PLXNB2,NYAP1,ADCY10,NBEAL2,EPHA4,HEXB,EIF4G2,ABL1,CD…	c5_GO.Biological.Process
GOBP_REGULATION_OF_B_CELL_DIFFERENTIATION	0.000367429	0.0218907	0.498493	0.571793	2.03107	25	BAD,ID2,ZFP36L2,PTPN6,BCL6,CD27,SPI1,NCKAP1L,IL4I1,ZFP36L1,PCID2,SYK,PPP2R3C	c5_GO.Biological.Process	0.275862	0.691558	0.11524	0.294839	1.14751	23	PTPN6,INHBA,BAD,CARD11,XBP1,NCKAP1L,STAT5B,ZFP36L2,BTK,PCID2	c5_GO.Biological.Process
REACTOME_CHROMATIN_MODIFYING_ENZYMES	0.000372849	0.0604796	0.498493	0.297433	1.64901	202	TBL1XR1,SMARCD2,MECOM,CHD3,MTA3,KDM5A,CHD4,ACTB,KDM2A,H2AX,SETD1B,JADE2,ATF7IP,KDM4B,KMT5B,ATXN7L3,KMT2A,KMT5C,BRMS1,RELA,KDM7A,MTA1,ARID1B,KDM5B,MTA2,ARID1A,KAT14,BRPF3,EHMT1,HDAC10,KMT2D,HCFC1,CCND1,ARID5B,KAT5,SMARCC1,ARID2,SUPT3H,ARID4B,KDM3B,MSL1,NCOA2,KDM6B,MSL2,KDM5C,SUPT7L,KAT6A,HDAC2,TAF6L,KDM1B,GATAD2A,SAP30L,PHF20,CARM1,RCOR1,MEAF6,ATXN7,SMARCC2,ING4,MBIP,ARID4A,EP300,PRMT1,HMG20B,SETD…	c2_curated.Canonical.Pathways	0.000742692	0.0295748	0.477271	-0.238691	-1.58108	239	H4C8,H2AC11,H3C3,H2BC3,H2BC4,H2AC6,H4C2,H2BC11,H4C3,H2AC16,H4C5,H3C4,H2BC7,H2AC7,H4C13,H3C11,H4C1,H3C1,H2BC13,H3C10,H2AC13,H2BC14,H2AC14,EZH2,H2AC12,H2BC12,H3C2,H2AC4,H2BC9,H3C7,MORF4L2,H3C8,H2BC10,SAP130,ARID1B,TADA3,NCOA2,H2AC20,ARID1A,H3C6,HCFC1,SMYD3,H2BC17,H3C12,H2AC17,H4C16,H2BC15,H2AC15,ENY2,H2AC25,ELP2,SETD7,HMG20B,SMYD2,H2BC8,H2AC8,KDM3A,RBBP4,SMARCC1,SUV39H2,H2BC21,H2AC21,TBL1X	c2_curated.Canonical.Pathways
GOBP_RESPONSE_TO_CARBOHYDRATE	0.00038352	0.0226723	0.498493	0.318812	1.69845	162	BAD,LYN,ERCC1,CDKN1B,EGR1,IGF1R,NR1D1,RMI1,MIR15A,MIR16-1,ACVR2B,C2CD2L,KHK,PFKL,SREBF1,CDK16,RACK1,RPS6KA2,SOD2,PPP3CA,APOA2,SELENOT,TWNK,MIR320E,GIPR,RAB11FIP5,ZFP36L1,KAT5,IL1B,RUNX2,MPC2,PIM3,SRF,GCLC,THBS1,ANO1,TRPM4,EIF2B4,UNC13B,EXTL3,PRKCE,MIR320B2,NADK,MAPK13,UBTF,CLTRN,SMAD2,TCF7L2,RAF1,FOXA2,IL1A,TXNIP,SRI,RBM4,CCDC186,MAFA,NAGLU,VAMP2,NQO1,GPX1,MIR320A,GLUL,PIH1D1,SIDT2,CFTR,SLC26A6,P…	c5_GO.Biological.Process	0.217636	0.644713	0.126254	0.18367	1.13962	163	SLC29A1,GYS2,BAD,ADNP,RPS6KB1,PAX2,RBM4,GAS6,ANO1,SOD2,NAGLU,ACVR2B,NPTX1,GCLC,MIR15A,MIR16-1,PRKCE,ZBED6,MPC2,MIR320E,TWNK,XBP1,EIF2B5,CASP3,TRA2B,EXTL3,ADCY5,RPS6KA2,FGF21,ERCC1,ZNF236,JAGN1,ME1,BAIAP3,LRP5,UCP2,SLC26A6,P2RX3,RAF1	c5_GO.Biological.Process
E2F transcription factor network; datasource: pid;	0.000386601	0.0678672	0.498493	-0.387008	-1.85517	63	MCM3,TP73,E2F1,CDKN1A,CES2,CES3,CDKN2C,CDC25A,RBL1,CDK1,MYBL2,TFDP1,CASP7,TOPBP1,TYMS,ATM,RRM2,KAT2A,E2F3,ORC1,UXT,TFDP2,PLAU,CDC6,POLA1,E2F7,TRRAP,TRIM28	PathwayCommons11	0.254348	0.756454	0.12564	-0.216941	-1.11896	65	TP73,TFDP2,MCM3,CDC6,CDC25A,CDK1,TFDP1,E2F5,CCNA2,DHFR,E2F7,RBL1,CCNE1,RRM2,RBBP4,E2F3,CDKN1B,UXT,TK1,TOPBP1,CDKN2C,E2F6,APAF1	PathwayCommons11
Interleukin signaling pathway; datasource: panther;	0.000387807	0.0678672	0.498493	0.406039	1.82545	63	CDKN1B,IL11,SOS2,RPS6KA3,NRAS,STAT6,IKBKB,MYC,IL11RA,RPS6KA2,SHC1,SPI1,IRS1,IL10RA,FOS,MKNK1,AKT2,IL6R,SRF,MAPK3,IL15RA,PDPK1,IL6ST,MAPK6,RAF1,IL1A,IL20RA,MKNK2	PathwayCommons11	0.364937	0.834476	0.0902635	0.211946	1.05978	61	ELK4,SHC1,NRAS,MKNK2,IL11,STAT6,MYC,JAK3,RPS6KA2,MAPK6,AKT2,FOS,STAT5A,STAT5B,RAF1,BRAF,STAT4,MAPK3	PathwayCommons11
WP_HEMATOPOIETIC_STEM_CELL_DIFFERENTIATION	0.000389697	0.0604796	0.498493	0.474806	1.96716	42	FOSB,CSF2,MIR15A,MIR16-1,RHOH,THRB,RUNX1,NFATC2,KITLG,SPI1,NCKAP1L,CSF1,IL1B,FOS,MUC1,PIM1,FLI1,ACVR1B,NOTCH1,MXI1,IL1A,IL5,LYL1	c2_curated.Canonical.Pathways	0.153082	0.571087	0.158514	0.275566	1.25476	42	CIITA,NOTCH1,MIR15A,MIR16-1,FOSB,VAV1,LYL1,NCKAP1L,FOS,ITGA2B,THRB,STAT5A,GATA2	c2_curated.Canonical.Pathways
TCR.Signaling	0.000389776	0.0045214	0.498493	0.401643	1.8313	72	CD247,PIK3CD,MAPK10,CSF2,SOS2,PSMB7,MAPK8,UBC,NRAS,RELA,IKBKB,NFATC2,NFKBIA,KRAS,MAPK9,PPP3CA,MAPK11,MAPK12,JUN,PSMB2,FOS,AKT2,NFATC1,MAPK3,PIK3R3,LAT,PAK5,PSMB10,RAF1,MAP3K14,IL5,PIK3R2	NanoString_Genes	0.187867	0.579649	0.140406	0.233792	1.20383	68	LAT,NRAS,NFATC3,CD4,PSMB10,PIK3R2,CARD11,MAPK11,MAPK12,UBC,RASGRP1,AKT2,RELA,FOS,NFKBIE,MAPK9,MAPK14,RAF1,SKP1,MAPK3,PSMB5	NanoString_Genes
WP_INSULIN_SIGNALING	0.000399575	0.0604796	0.498493	0.328654	1.73167	143	MAP4K5,MAP4K2,SNAP23,EHD1,PIK3CD,RHOQ,FLOT2,PRKCH,MAPK10,EGR1,IGF1R,SH2B2,EHD2,CBLC,RRAD,SOS2,RPS6KA3,PRKCD,TRIB3,MAPK8,PFKL,IKBKB,PTPN1,MAPK9,RPS6KA2,STXBP1,SHC1,MAPK11,MAPK12,PRKCZ,JUN,IRS1,MAP4K4,MAP3K10,FOS,AKT2,SRF,RPS6KA4,GYG1,MAPK3,PRKCA,PFKM,PIK3R3,MAP3K11,ARF6,PDPK1,MAPK13,RHEB,CBLB,MAPK6,RAF1,PRKCI,MAP3K14,RPS6KB2,STXBP2,PIK3R2,MAP2K7,MAP3K12	c2_curated.Canonical.Pathways	0.114878	0.519343	0.179782	0.214723	1.26636	143	MAP2K7,GYS1,EHD1,MAP3K11,GSK3A,SLC2A1,RPS6KB2,GYS2,SHC1,RPS6KB1,TRIB3,SGK2,MAP4K2,PIK3R2,RRAD,RPS6KA4,MAPK11,MAPK12,GYG1,XBP1,KIF5B,RPS6KA2,EIF4EBP1,ARF1,MAPK6,AKT2,FOS,PRKCD,STXBP2,INPPL1,FLOT2,PTPN11,MAPK9,SOCS1,MAPK14,RAF1,RHOQ	c2_curated.Canonical.Pathways
Cadherin signaling pathway; datasource: panther;	0.000400327	0.0678672	0.498493	0.405117	1.91007	76	EGFR,LYN,WNT5B,ACTB,CDH16,ERBB3,CDHR2,WNT10A,FAT3,FZD2,CELSR2,WNT7B,WNT9A,PTPN1,CDH15,WNT11,TCF7L2,PCDHGA12,PCDHGC3,PCDHGC5,PCDHGC4,PCDHGB7,PCDHGB6,PCDHGB2,PCDHGB1,PCDHGA11,PCDHGA10,PCDHGA7,PCDHGA6,PCDHGA5,PCDHGA3,PCDHGA2,PCDHGA1,PCDHGB4,PCDHGA8,WNT3A,CDH24,FSTL1	PathwayCommons11	0.412098	0.857045	0.08654	0.195226	1.02944	80	CDH24,CSNK2A3,ACTB,WNT7B,FZD1,CSNK2A2,CDH3,CDH16,WNT5B,WNT10A,CELSR2,WNT2B,FZD2,CELSR1,FZD4,WNT11,CDH1,WNT4,CELSR3	PathwayCommons11
GOBP_CONNECTIVE_TISSUE_DEVELOPMENT	0.000403644	0.0236784	0.498493	0.299393	1.65555	205	TBL1XR1,FOSL2,TSKU,AMER1,SMAD7,BMP4,WNT5B,BMP8B,EGR1,NPR2,HMGA2,HOXA11,PDGFA,HOXA3,MIR125A,SMAD3,HOXA5,CRIP1,BMPR1B,TGFB1,MKKS,RARA,BMP6,SOX6,SATB2,SOX9,CFLAR,RUNX1,PBXIP1,NFATC2,WNT7B,WNT9A,OSR2,HOXB3,HOXC4,SPI1,ARRDC3,MSX1,ZEB1,PLAAT3,ECM1,CSF1,RFLNA,ARID5B,BMPR2,RUNX2,RARG,MDK,EXT1,IL6R,SRF,NCOA2,NOG,THBS3,TRPM4,PGRMC2,CHSY1,MAPK3,NAMPT,NFIB,FGF2,WNT11	c5_GO.Biological.Process	0.0483255	0.394422	0.321776	0.208675	1.33965	212	SMAD7,BMPR1B,CTSK,SLC25A25,NPR2,COL27A1,ARID5B,FOXC2,HSD17B1,HOXA3,HOXA5,KAT2A,TGFB1,NOTCH1,WNT7B,HOXD3,RARB,WNT5B,RARG,FOXD1,XBP1,PBXIP1,MDK,WNT2B,MKKS,BBS1,SH3PXD2B,PLAAT3,FOXA1,BBS2,BMP4,HOXC4,MIR125A,SOX6,BMP1,ZEB1,HOXA11,GLG1,WNT11,PTPN11,NKX3-2,LRP5,SMAD1,MAPK14,DDRGK1,TGFBR2,SNORC,CHADL,ARID5A,MATN1,ITGB8,HOXB3,FGF2,NFIA,PTH1R,BMP7,NPPC,NCOA1,MAPK3,LOX,HIF1A,THBS3,DGAT2,PDGFA,BBS4,FGFR3,CO…	c5_GO.Biological.Process
GOBP_INTERLEUKIN_6_MEDIATED_SIGNALING_PATHWAY	0.000418005	0.0243336	0.498493	0.610529	2.0911	21	MIRLET7A1,MIRLET7E,MIR125A,JAK1,MIR26A1,SPI1,IL6R,RIPK1,MIR98,IL6ST,GFI1,YAP1,STAT3,PTPN2	c5_GO.Biological.Process	0.467871	0.806617	0.0828962	0.26002	0.98858	21	MIRLET7E,MIR125A,GFI1,MIRLET7C,MIR99A,IL6ST,CEBPA,RIPK1,MIR26A1,IL6R,MIR98,PTPN2,SPI1	c5_GO.Biological.Process
GOBP_MAPK_CASCADE	0.000424392	0.0245085	0.498493	0.24008	1.4701	517	LTBR,MAP4K5,PAK6,EDAR,MEN1,MAP4K2,MBP,EGFR,MECOM,LYN,ZFP36L2,EFNA1,MIR200C,PTPN6,SORBS3,BMP4,DKK1,INAVA,MAPK10,IL11,IGF1R,NPR2,CARD9,CBLC,PDGFA,NF2,SMAD3,TAOK2,TGFB1,SPAG9,STK4,LAMTOR1,DAB2IP,AIDA,RAP1GDS1,SH2B3,TMEM106A,NBR1,C5AR1,PRKCD,CAVIN3,ABL1,MIR29B1,SOX9,CAV2,DNAJC27,MAPK8,YWHAZ,CFLAR,IGFBP4,EMILIN1,NRAS,MIR26A1,TRAF4,IKBKB,MYC,CD27,WNT7B,KRAS,FLCN,PTPN1,SPRY4,TNIK,PRDX1,MAPK9,NOD1,NDST1,…	c5_GO.Biological.Process	0.00354061	0.114972	0.431708	0.192316	1.38347	519	RBX1,MAP2K7,DVL2,ALOX12B,PRMT1,MAP3K11,MAPKAPK5,PRMT5,PAFAH1B1,MIR200C,PTPN6,KARS1,INHBA,SPRY1,SHC1,ZFP36,CARD9,TMEM106A,NBR1,NRAS,FAM83D,GAS6,NPR2,IL11,TGFB1,DOK4,CAV1,PTPN7,NOTCH1,PDGFC,CNKSR3,PRKD2,CD4,YWHAZ,MYC,WNT7B,LIF,QARS1,PRKCE,STK40,LAMTOR2,EPHA4,INAVA,MADD,MEN1,MAP4K2,ABL1,PIK3R2,ASH1L,ABCA7,PSCA,DUSP1,ARHGAP8,MAPK11,MAPK12,NTF3,MST1R,AKAP13,FGFR4,SORBS3,SOX2,SPRY3,MYDGF,TRAF4,ZMYND11,…	c5_GO.Biological.Process
GOBP_RESPONSE_TO_SALT	0.000427437	0.0245085	0.498493	0.291289	1.63404	232	SYT7,DPEP1,PLEC,FOSB,TNNT2,CARF,CAPN3,CDKN1B,KRT8,EGR1,IGF1R,NPR2,NT5E,ANXA11,ZNF16,D2HGDH,PPP1R1B,SLC25A23,PDCD6,P2RX4,ATP2B4,KMT2A,NEDD4,DLG4,NFATC2,VPS54,JUNB,MDM2,SYT5,SOD2,SYT17,PPP3CA,ITPR3,GNB1,SLC25A13,GIPR,ADD1,PPP1R9B,DMTN,IL1B,FOS,ECT2,PDXP,CALM3,SLURP2,DGKQ,RUNX2,CACNA1H,PPP5C,SSH1,TOMM20,P2RX1,GCLC,THBS1,TRPM4,ADCY7,PRKCG,ATG5,PTCH1,NTRK1,PRKCE,TMBIM6,SIPA1,HDAC2,ITPKA,NEUROD2,MAPK13…	c5_GO.Biological.Process	0.238197	0.663423	0.129443	-0.164229	-1.10019	245	KCNMB2,FADD,RYR2,HDAC5,ITPKC,SDK1,PTK2B,RUNX2,GRM2,IGF1R,SLC1A2,PPP2R2A,PRKAA1,SSH1,BAIAP2,SEC31A,KCNMB4,PPIF,ABAT,TIAM1,WNT5A,ADCY1,ATP7A,HNRNPD,SLC1A1,PRKAA2,CASQ2,PIK3CA,CCNA2,AQP3,FYN,KCNJ10,PTGS2,DHFR,CAMK2D,GNAQ,CHRND,ITPKB,GUCA1A,GCLM,STK39,PANX1,CRKL,CLIC4,NLGN1,SLC1A3,TLR9,CDKN1B,CDK5	c5_GO.Biological.Process
GOBP_SUPRAMOLECULAR_FIBER_ORGANIZATION	0.000437519	0.0248689	0.498493	0.236035	1.46478	584	DSTN,CDC42EP3,TLE6,FBLN5,SPTB,PLEC,RHOQ,FSCN2,TNNT2,SORBS3,ANXA2,CCDC57,CAPN3,CDKN1B,KRT8,RAC3,SPAST,TMSB10,THSD4,CYP1B1,MET,HOOK3,EPS8,NF2,SMAD3,PKP1,CAMSAP1,EFEMP2,STMN3,CAPZA1,F11R,TESK1,MKKS,ESAM,RND2,TCAP,MICALL2,RAP1GDS1,LOXL1,CLASP1,RHOH,PRKCD,BFSP1,ABL1,MIR29B1,KRT7,KRT86,KPTN,CFLAR,SPTBN5,EMILIN1,KIF18A,DVL1,TPPP3,SLC9A1,CSRP1,CORO1A,NCKAP1,BAG4,RHOT2,MDM2,RICTOR,RHOV,PLK3,P3H4,FKBP10,IN…	c5_GO.Biological.Process	0.00196125	0.0875224	0.431708	0.192603	1.40629	598	KPTN,PAFAH1B1,P3H4,FKBP10,CAPZA1,MIR149,GOLGA2,FHOD1,FSCN2,HCLS1,GSN,CORO6,KANK3,TUBG1,TPPP,KPNB1,ARL2,RHOV,OBSCN,GBA2,COL27A1,AVIL,HAX1,BAX,WASF1,CDC42EP3,FOXC2,LOXL3,F11R,ELN,PLEKHG2,KRT15,KRT19,SVIL,RHOF,CDC42EP1,HDGFL3,TPPP3,RANGRF,ADAMTS2,B4GALT7,MICAL3,PRKCE,BACE1,ANG,TMSB15B,PFN1,ABL1,FKBP1A,PIK3R2,CCDC88B,ZNF207,ARHGEF2,CNN2,SNX9,ESPN,SPTBN4,SWAP70,PCM1,ARPC3,KRT8,SIX4,CAPG,HSP90AB1,AKAP1…	c5_GO.Biological.Process
WP_ANGIOPOIETIN_LIKE_PROTEIN_8_REGULATORY_PATHWAY	0.000439175	0.0617476	0.498493	0.348589	1.75278	109	MAP4K5,SLC16A2,MAP4K2,MAPKAP1,PIK3CD,RHOQ,FLOT2,MAPK10,CBLC,SOS2,RPS6KA3,MAPK8,THRB,SREBF1,PTPN1,MAPK9,RPS6KA2,RICTOR,SHC1,MAPK11,MAPK12,IRS1,RXRA,MAP4K4,PRKAG1,MAP3K10,RPTOR,AKT2,RPS6KA4,MAPK3,PIK3R3,MAP3K11,PDPK1,MAPK13,RHEB,MLST8,CBLB,MAPK6,RAF1,MAP3K14,RPS6KB2,PIK3R2,MAP2K7,MAP3K12	c2_curated.Canonical.Pathways	0.0446896	0.387964	0.321776	0.250725	1.42775	110	MAP2K7,GYS1,MAP3K11,GSK3A,SLC2A1,PRKAG1,RPS6KB2,SHC1,FASN,RPS6KB1,RPTOR,EXOC7,NR1H3,MAP4K2,PIK3R2,RPS6KA4,MAPK11,MAPK12,RPS6KA2,EIF4EBP1,MAPK6,AKT2,THRB,FLOT2,MAPK9,MAPK14,MLST8,RAF1,RHOQ,TSC1,MAPK3,PRKAB2,MAP2K4,MAP4K5,MAP3K5,SLC16A2,SESN3,MAP4K3,MTOR,SHC2,CRK,PIK3CD,MAP2K2,PDPK1,SREBF1,IRS4,TSC2,MAP3K10,INS	c2_curated.Canonical.Pathways
GOBP_POSITIVE_REGULATION_OF_IMMUNE_SYSTEM_PROCESS	0.000440243	0.0248689	0.498493	0.228856	1.42514	638	BAD,AXL,TNFRSF18,CD247,HEXIM1,SMARCD2,FOSL2,MYO18A,PIK3CD,CACTIN,HAMP,LYN,SPON2,ID2,PTPN6,CACNB3,FLOT2,PRKCH,ZDHHC5,AP3D1,STOML2,ACTB,INAVA,SH2B2,NR1D1,NOP53,CARD9,BCL6,SH2D1A,CLCF1,FUT4,FUT7,SOX12,NLRP1,TGFB1,PTK2,LACC1,DHPS,RARA,DAB2IP,RPS6KA3,STK11,SHLD1,KLRD1,EXOSC3,SHB,P2RX4,RHOH,C5AR1,PRKCD,KMT5B,ABL1,SEC14L1,MAPK8,CACNB4,UBE2K,RUNX1,KMT5C,STAT6,RELA,IKBKB,CD22,CD27,NFATC2,NFKBIA,CORO1A,VEG…	c5_GO.Biological.Process	0.0298686	0.308662	0.352488	0.170363	1.24921	637	AXL,PHPT1,IRF3,BLOC1S3,MARK4,TNFSF13,ACIN1,PTPN6,KARS1,TBK1,BAD,MIR149,LACC1,TRIM41,DDX3X,ZBTB7B,LAT,HCLS1,CARD9,CD320,ZNF580,RBM14,LGR4,GAS6,FUT7,HAX1,NECTIN2,HEXIM1,BAX,SPON2,NAGLU,AKIRIN1,SPHK2,SPG21,STAT6,TGFB1,TNFSF9,CAV1,C17orf99,TNFRSF13C,CSNK1A1,ITGB2,ELF1,PRKD2,CD4,RABGEF1,DHPS,ACTB,SFPQ,RPTOR,LIF,PRKCE,ZCCHC3,WNK1,HSPD1,A2M,AP3D1,NOS2,KLHL6,INAVA,NR1H3,RASAL3,VEGFB,ABL1,CCDC88B,CARD11,S…	c5_GO.Biological.Process
BIOCARTA_KERATINOCYTE_PATHWAY	0.000441568	0.0617476	0.498493	0.497146	2.00556	38	EGFR,TNFRSF1A,SP1,PRKCH,HOXA7,PRKCD,MAPK8,RELA,IKBKB,NFKBIA,JUN,FOS,PRKCG,RIPK1,MAPK3,PRKCA,PRKCE,MAPK13,RAF1,MAP3K14,MAP2K7,TRAF2,TNFRSF1B,FAS	c2_curated.Canonical.Pathways	0.53831	0.838609	0.0743625	0.212208	0.941497	38	MAP2K7,HOXA7,PRKCE,RELA,FOS,PRKCD,MAPK14,RAF1,PPP2CA,MAPK3,MAP2K4,TNFRSF1A,CEBPA,ETS2,MAP3K5,RIPK1	c2_curated.Canonical.Pathways
GOBP_POSITIVE_REGULATION_OF_EXTRACELLULAR_MATRIX_ORGANIZATION	0.000443934	0.0248929	0.498493	0.594779	2.06677	23	PHLDB1,SMAD3,EFEMP2,TGFB1,CLASP1,ABL1,SOX9,CFLAR,EMILIN1,RUNX1	c5_GO.Biological.Process	0.109533	0.521168	0.191892	0.341074	1.32746	23	TGFB1,ABL1,MELTF,PHLDB1,FSCN1,EFEMP2,CARMIL2,CLASP2,RB1,EMILIN1,CFLAR,DAG1,RUNX1	c5_GO.Biological.Process
WP_ERBB_SIGNALING_PATHWAY	0.000456906	0.0617476	0.498493	0.391841	1.85868	80	BAD,BUB1B-PAK6,PAK6,EGFR,PIK3CD,CDKN1B,MAPK10,BTC,ERBB3,PTK2,SOS2,ABL1,MAPK8,NRAS,MYC,KRAS,MDM2,MAPK9,SHC1,JUN,TP53,CCND1,AKT2,PRKCG,MAPK3,PRKCA,PIK3R3,PDPK1,NCK1,PAK5,CBLB,RAF1,RPS6KB2,PIK3R2,MAP2K7	c2_curated.Canonical.Pathways	0.159664	0.576785	0.159647	0.225441	1.21499	80	MAP2K7,CCND1,RPS6KB2,BAD,SHC1,RPS6KB1,NRAS,MYC,ABL1,PIK3R2,BCL2L11,TP53,EIF4EBP1,CAMK2G,BUB1B-PAK6,PAK6,AKT2,MAPK9,STAT5A,STAT5B,RAF1	c2_curated.Canonical.Pathways
Effects of PIP2 hydrolysis; datasource: reactome;	0.000465209	0.0727976	0.498493	0.656601	2.10593	16	PRKCH,DGKE,DGKG,PRKCD,DGKH,ITPR3,DGKQ,DGKZ,PRKCE,ITPR2	PathwayCommons11	0.0647773	0.575909	0.252961	0.43131	1.50826	17	DGKE,PRKCE,RASGRP2,TRPC3,DGKZ,RASGRP1,ITPR2,PRKCD	PathwayCommons11
GOBP_STRESS_ACTIVATED_PROTEIN_KINASE_SIGNALING_CASCADE	0.000466362	0.0259597	0.498493	0.304138	1.65078	186	LTBR,EDAR,MEN1,MAP4K2,EGFR,MECOM,LYN,BMP4,INAVA,MAPK10,IGF1R,CARD9,SMAD3,TAOK2,NLRP1,DAB2IP,AIDA,NBR1,MAPK8,TRAF4,IKBKB,MYC,CD27,WNT7B,TNIK,PRDX1,MAPK9,NOD1,SPI1,MAPK11,SEMA3A,SPHK1,DACT1,RB1CC1,MAP4K4,PHLPP1,MAP3K10,SEMA4C,ZFP36L1,IL1B,CCDC88C,SASH1,MAP3K20,HIPK2,RNF13,CRYAB,RIPK1,MAPK3,KLHL31,MAP3K11,ZFP36,MAPK13,STK3,MAPKBP1,UNC5CL,MIR181A2,KLHDC10,GSTP1,MBIP,PRMT1,TGFBR3,IL1A,TAOK1,COPS5,HIPK…	c5_GO.Biological.Process	0.769063	0.92936	0.0618406	-0.136968	-0.878104	185	EGFR,EIF2AK2,MAP3K13,PTK2B,SH2D3A,MIR92A1,MIR20A,IGF1R,MAP2K3,MAP4K1,PER1,GADD45A,MIR181B1,TNIK,PRKN,UNC5CL,WNT5A,CCN2,PHLPP1,PJA2,MAP4K4,CYLD,ULK4	c5_GO.Biological.Process
GOBP_ENZYME_LINKED_RECEPTOR_PROTEIN_SIGNALING_PATHWAY	0.000479427	0.0264935	0.498493	0.219146	1.37897	726	AXL,MMRN2,MEN1,CTSD,ZNF106,PTPN18,HTRA4,EGFR,PIK3CD,LYN,FSTL3,RHOQ,SGPL1,SMAD7,WFIKKN1,EFNA1,ERCC1,MIR200C,BMP4,DKK1,EGR1,IGF1R,NPR2,BCL9L,AKT1S1,SH2B2,SKOR1,MET,CBLC,PDGFA,SKIL,FNTA,MIRLET7F1,PML,SMAD3,RALB,FUT7,TNS2,BTC,ERBB3,BMPR1B,ITGB6,FKBP8,TGFB1I1,DDX5,FRS3,ZFAND5,TGFB1,PTK2,MBD5,SOS2,CITED2,MIR16-1,DAB2IP,PMEPA1,BMP6,JAK1,ACVR2B,STK11,KIF16B,FGF5,PRICKLE1,SH2B3,PDCD6,PRKCD,SLC27A4,SIPA1L1…	c5_GO.Biological.Process	5.74912e-05	0.0091399	0.557332	0.20275	1.50557	759	TGFBR3L,AXL,ZBTB7A,PRMT1,WFIKKN1,GSK3A,MIR200C,INHBA,FAM89B,SPRY1,GNG7,GPC1,MIR149,SHC1,SMAD7,ZBTB7B,BMPR1B,RPS6KB1,MIR195,MIR497,ARNT,FKBP8,EPHA10,PPARA,SNX25,RBM4,RBM14,GAS6,NPR2,MERTK,FUT7,ARID5B,WASF1,CHMP6,FOXC2,MMP2,PCSK6,FLRT1,LRP1,STAT6,ZFYVE28,TGFB1,DOK4,ACVR2B,NOTCH1,PDGFC,MVB12B,PRKD2,ZNF592,CD4,RABGEF1,FAM83C,FZD1,LIF,MIR16-1,MIR10B,PPP2R5B,EPHA4,IL17RD,MEN1,VEGFB,ABL1,FKBP1A,CDH3,PIK…	c5_GO.Biological.Process
Aryl hydrocarbon receptor signalling; datasource: reactome;	0.000479928	0.0727976	0.498493	0.870521	2.00312	6	AIP,PTGES3,AHRR	PathwayCommons11	0.0163129	0.564269	0.352488	0.708367	1.71687	6	ARNT,HSP90AB1,PTGES3,AIP,AHRR	PathwayCommons11
GOBP_TRACHEA_CARTILAGE_DEVELOPMENT	0.000487271	0.0267333	0.498493	0.853746	1.9534	6	HOXA5,RARA,SOX9,WNT7B,RARG,SRF	c5_GO.Biological.Process	0.00130839	0.068386	0.45506	0.867385	1.98041	5	HOXA5,WNT7B,RARG	c5_GO.Biological.Process
HALLMARK_TNFA_SIGNALING_VIA_NFKB	0.000502538	0.0251269	0.477271	0.310271	1.63828	159	TRAF1,FOSL2,EHD1,NFE2L2,ID2,EFNA1,FOSB,BTG1,NR4A2,TNFAIP2,EGR1,BCL6,JAG1,CLCF1,FUT4,SMAD3,CSF2,PMEPA1,TGIF1,CEBPB,TNFAIP8,CFLAR,RELA,MYC,GFPT2,NFKBIA,MCL1,B4GALT1,JUNB,SOD2,SPHK1,TSC22D1,JUN,CSF1,CCND1,IL1B,FOS,TNIP1,LAMB3,KLF9,KDM6B,MARCKS,DNAJB4,NFAT5,ABCA1,IL15RA,NAMPT,ZFP36,OLR1,ATF3,IL6ST,TIPARP,TNC,SLC16A6,DRAM1,IL1A,NR4A1	h.Hallmark.Gene.Sets	0.539623	0.836968	0.0721798	0.15769	0.959728	157	MCL1,CCND1,KDM6B,RELB,ZBTB10,EHD1,NFAT5,INHBA,ZFP36,CEBPB,SOD2,ABCA1,TNFSF9,MYC,LIF,FOSB,DUSP1,NFKB2,EFNA1,TGIF1,RELA,FJX1,FOS,NFKBIE,IER5,MARCKS,RIGI,STAT5A	h.Hallmark.Gene.Sets
GOBP_EMBRYONIC_APPENDAGE_MORPHOGENESIS	0.000503213	0.0272364	0.477271	0.37496	1.83265	94	TMEM231,IFT122,BMP4,DKK1,TFAP2A,HOXA9,HOXA10,HOXA11,ECE1,CYP26B1,IFT140,PRICKLE1,TP63,RECK,TBX2,GRHL2,OSR2,HOXC10,MSX1,BAX,HOXC11,RUNX2,RARG,MAP3K20,NOG,WDPCP,PTCH1,HDAC2,SP9,SALL4,FBXW4,RDH10,NOTCH1,DLX6,NIPBL,MED1,MBNL1	c5_GO.Biological.Process	0.0492707	0.395415	0.321776	0.247652	1.40639	102	ECE1,TFAP2A,BAX,ZNF358,FBXW4,NOTCH1,B9D1,PTCH1,RARB,HOXC11,MKS1,RARG,BCL2L11,GRHL2,SP9,TBX2,RDH10,CREBBP,BMP4,MED1,HOXC10,HOXA9,HOXA10,HOXA11,TMEM107,LRP5,HOXD10,HOXD12,HDAC2,CRABP2,MEGF8,BMP7,LRP4	c5_GO.Biological.Process
GOBP_HOMEOSTASIS_OF_NUMBER_OF_CELLS	0.000503583	0.0272364	0.477271	0.284816	1.59795	231	AXL,FOSL2,PIK3CD,HAMP,SLC1A5,LYN,MAEA,ID2,BMP4,HOXB6,RAC3,SH2B2,CARD9,BCL6,SKIL,ZNF16,HOXA5,ISG15,SOS2,CITED2,SH2B3,ABL1,SOX9,KMT2E,KMT2A,CFLAR,ZBTB7A,SMAP1,P4HTM,CORO1A,VPS54,KRAS,PRDX1,NFKBIZ,KITLG,SPI1,ERCC2,NCKAP1L,BAX,FOXP3,MAPK11,BAK1,CSF1,ZNHIT1,RACGAP1,ETV2,OCIAD1,ZFP36L1,DMTN,PKNOX1,CDIN1,EXT1,FOXN1,SRF,PTBP3,HIPK2,ADGRG1,HCLS1,CEBPG,LGR4,F2R,ACVR1B,ZFP36,RCOR1,ASXL1,ACVR2A,IL20RB,NOTCH1…	c5_GO.Biological.Process	0.0036829	0.118659	0.431708	0.230761	1.50886	231	SLC1A5,AXL,ZBTB7A,PRMT1,PKN1,ACIN1,ISG15,INHBA,ZFP36,LAT,HCLS1,CARD9,TCIRG1,ARNT,HOXB6,LGR4,SART3,MERTK,UBAP2L,BAX,LDB1,MAEA,RCOR1,HOXA5,CEBPG,NOTCH1,ABL1,CARD11,SPNS2,MAPK11,BCL2L11,JAK3,CASP3,HAMP,ZFPM1,ETV2,NCKAP1L,BRD1,XKR8,JMJD6,BMP4,MED1,ARMCX5-GPRASP2,GPRASP2,NF1,NCAPG2,ZFX,ADGRG1,NCSTN,PKNOX1,PTPN11,SMO,MAPK14,STAT5B,ERCC2,ADAR,GIGYF2,VPS54,GATA2,EPB42,PPP2CA,ADAM17,SH2B2,HIF1A,HMOX1,SKIL…	c5_GO.Biological.Process
GOBP_POSITIVE_REGULATION_OF_EPITHELIAL_CELL_DIFFERENTIATION	0.000508992	0.027335	0.477271	0.441457	1.92696	55	CYP27B1,BAD,MIR200C,BMP4,PRKCH,BTG1,MIR99B,ETV4,VDR,BMP6,MACROH2A1,SOX9,VEZF1,SFN,FOXJ1,ETV2,NCOA3,RPTOR,NME2,FOXN1,PTCH1,FGF2,CD24,NOTCH1,MIR181A2,MED1,FOXC1,SULT2B1	c5_GO.Biological.Process	0.00673701	0.164932	0.407018	0.36383	1.75481	51	ETV4,MIR200C,BAD,PAX2,MACROH2A1,NOTCH1,PTCH1,RPTOR,LIF,MIR34A,ETV2,OVOL2,BMP4,MED1,SULT2B1,MIR99B,FOXC1,FGF2,CYP27B1,BMP7,VDR,NME2,BTG1,PTCH2	c5_GO.Biological.Process
GOBP_CELLULAR_RESPONSE_TO_ABIOTIC_STIMULUS	0.000515007	0.0274646	0.477271	0.288329	1.64658	261	RDH11,BAD,KCNK4,SCNN1A,LTBR,SLC38A2,TNFRSF1A,PLEC,ERCC1,TMEM87A,CAPN3,EGR1,MYLK,IGF1R,NSMF,RAD9A,H2AX,CRIP1,ITGB6,NLRP1,F11R,PIEZO1,BMP6,STK11,RPL26,CLN3,XPA,SLC25A23,BRCA1,PRKCD,TMEM109,SOX9,MAPK8,NEDD4,MYC,SLC9A1,TP53INP1,YBX3,BAG3,MDM2,POLH,TLK2,ADSS1,BAX,MAPK11,BAK1,POLD1,TP53,RGS9,RAB11FIP5,CNN2,ZFP36L1,RPTOR,IL1B,ECT2,CASP8,AKT2,MAP3K20,GRK4,ACTR5,GCLC,N4BP1,ATF4,GNB5,NFAT5,CRYAB,MAPK3,CCND…	c5_GO.Biological.Process	0.00198415	0.0877451	0.431708	0.238577	1.57969	255	RBX1,LRRC8E,RELB,RUVBL2,PALM,SIPA1,ERCC4,NFAT5,SLC2A1,SLC25A23,BAD,KCNK4,SWI5,DDX3X,BRCA1,CLN3,AQP10,BAX,MMP2,MCOLN1,MAG,F11R,USP47,PDE2A,MYC,GCLC,TSPYL5,RPTOR,POLH,WNK1,H2AX,INSRR,DDB2,ARHGEF2,XPA,CNN2,NMT1,MAPK11,PKD2L1,CASP3,TP53,HABP4,ERCC1,TLK2,CREBBP,TNFRSF10A,NEUROD2,AKT2,CERS1,PIERCE1,PIEZO1,PRKCD,ST20,OPN4,STK11,WNT11,TMEM109,MAPK14,XRCC6,SLC38A2,TNKS1BP1,TAF1,YY1,MLST8,EP300,CRY2,RAD9A,…	c5_GO.Biological.Process
WP_FOCAL_ADHESION	0.000517247	0.0643195	0.477271	0.320519	1.7009	152	BAD,BUB1B-PAK6,PAK6,TLN2,CAPN2,EGFR,PIK3CD,RAC3,ACTB,MAPK10,MYLK,IGF1R,MET,PDGFA,ITGB6,PTK2,LAMC1,CAV2,MAPK8,VEGFB,MAPK9,SHC1,JUN,PXN,MYL11,CCND1,ITGB5,PTK6,SRMS,BCAR1,ARHGAP35,PDGFRA,AKT2,LAMB3,ITGA1,THBS3,THBS1,PARVB,PARVG,PRKCG,MAPK3,PRKCA,CCND2,LAMC3,PPP1CA,PIK3R3,LAMC2,PDPK1,LAMA5,MYL5,CDC42,TNC	c2_curated.Canonical.Pathways	0.188645	0.602803	0.135002	0.193603	1.16046	150	CCND1,BAD,SHC1,LAMB2,MYL5,MYL12B,CAV1,PDGFC,ITGA10,ITGB4,ACTB,PIP5K1C,VEGFB,PIK3R2,PARVB,PARVG,VAV1,ARHGAP5,BUB1B-PAK6,PAK6,VASP,AKT2,LAMC1,PGF,ITGA2B,CDC42,MYLK4,MAPK9,PTK6,SRMS,RAF1,CAV2,ITGA3,ITGB8,TESK2,BRAF,DOCK1,PXN,MAPK3,MYL11,RAC1,BCAR1,THBS3,PDGFA,ITGB5,ITGA11,ITGA5,ACTN1,COMP,TNK2	c2_curated.Canonical.Pathways
Regulation of PTEN gene transcription; datasource: reactome;	0.000521867	0.0750354	0.477271	0.441412	1.91533	53	MECOM,CHD3,MTA3,CHD4,EGR1,PHC3,LAMTOR1,MAF1,MTA1,MTA2,ATN1,LAMTOR2,JUN,TP53,RPTOR,HDAC7,MAPK3,HDAC2,GATAD2A,SALL4,RCOR1,RHEB,MLST8	PathwayCommons11	0.0462385	0.572801	0.321776	0.305734	1.47518	55	MTA2,CHD3,CHD4,ATN1,RCOR1,MTA3,HDAC7,RPTOR,LAMTOR2,CBX4,TP53,GATAD2A,MAF1,LAMTOR3,RRAGD,MLST8,LAMTOR4,SCMH1,HDAC2,MAPK3,PHC3	PathwayCommons11
GOBP_INTERLEUKIN_17_PRODUCTION	0.000525719	0.0278412	0.477271	0.54921	2.06292	29	ARG2,CARD9,MIRLET7F1,TGFB1,MIR26A1,NCKAP1L,FOXP3,SPHK1,ZBTB7B,TNFSF4	c5_GO.Biological.Process	0.452427	0.799368	0.0828962	-0.241446	-1.01077	29	MIR20A,FOXP3,IL18,IL12A,DDIT3,ARG2,PRKCQ	c5_GO.Biological.Process
PID_BETA_CATENIN_NUC_PATHWAY	0.000527809	0.0643195	0.477271	0.433429	1.89541	56	TBL1XR1,CTBP1,ID2,DKK1,CHD8,YWHAZ,MYC,SFN,TNIK,TLE1,JUN,CCND1,TCF7,NCOA2,ADCY7,YWHAG,CCND2,HDAC2,SALL4,YWHAQ,MMP2,TCF7L2,EP300	c2_curated.Canonical.Pathways	0.0887574	0.479376	0.2114	0.269184	1.33717	57	CCND1,RUVBL2,CBY1,TLE5,CTBP1,MMP2,YWHAZ,MYC,ADCY7,XPO1,CHD8,MED12,CDH1,SP5,EP300,HDAC2,SKP1	c2_curated.Canonical.Pathways
WP_VITAMIN_D_SENSITIVE_CALCIUM_SIGNALING_IN_DEPRESSION	0.000536885	0.0643195	0.477271	0.56349	2.05346	25	CYP27B1,NFE2L2,GRIN2D,VDR,ATP2B4,GRIN1,ITPR3,RXRA,GCLC,KDM6B,ITPR2,KDM1B,GGT1	c2_curated.Canonical.Pathways	0.292247	0.702644	0.110122	0.289889	1.11622	24	KDM6B,GCLC,GGT1,ITPR2,CHRM1,GSR,CYP27B1,NFE2L2	c2_curated.Canonical.Pathways
REACTOME_ESTROGEN_DEPENDENT_GENE_EXPRESSION	0.000543928	0.0643195	0.477271	0.355335	1.7468	99	CTSD,NRIP1,USF2,GTF2A1,SP1,FOSB,STAG2,H2AX,DDX5,MOV10,USF1,PTGES3,CXXC5,KDM4B,ZNF217,RUNX1,MYC,TNRC6A,GTF2F1,TLE3,JUN,CCND1,NCOA3,POLR2B,KAT5,FOS,RAD21,H3-3B,POU2F1,NCOA2,SMC1A,TNRC6C,CARM1,JUND,EP300,PRMT1,FOXA1,MED1	c2_curated.Canonical.Pathways	9.55754e-07	6.57385e-05	0.643552	-0.360221	-2.16007	132	H4C8,H3C3,H2BC3,H2BC4,H2AC6,H4C2,H2BC11,H4C3,H4C5,CHD1,H3C4,H2BC7,H2AC7,BCL2,H4C13,H3C11,H4C1,H3C1,H2BC13,H3C10,H2BC14,H2AC14,POLR2B,H2BC12,H3C2,H2AC4,H2BC9,H3C7,H3C8,H2BC10,KCTD6,NCOA2,H2AC20,H3C6,MYB,H2BC17,H3C12,H4C16,H2BC15,POLR2I,NR5A2	c2_curated.Canonical.Pathways
GOBP_REGULATION_OF_HORMONE_BIOSYNTHETIC_PROCESS	0.000547867	0.028814	0.477271	0.604555	2.07063	21	CYP27B1,ADM,H6PD,EGR1,IGF1R,BMP6,NR3C1,ATP1A1,DKK3,DGKQ	c5_GO.Biological.Process	0.0431718	0.371414	0.321776	0.424364	1.57507	20	NR3C1,ARNT,CLCN2,STC2,WNT4,GFI1,CYP27B1,HIF1A,PDE8B	c5_GO.Biological.Process
GOBP_POSITIVE_REGULATION_OF_MOLECULAR_FUNCTION	0.000558767	0.029186	0.477271	0.215652	1.3813	910	GABARAPL2,CYP27B1,BAD,AXL,AGAP11,MAP4K2,ANTKMT,TRAF1,CTSD,MBP,GLRX,PTPA,EGFR,LYN,ATG14,EFNA1,TNNT2,ANXA2,CACNB3,FLOT2,BMP4,PRKCH,CAPN3,DKK1,EGR1,IGF1R,RGP1,PNKP,HMGA2,SCARB1,CARD9,MET,PDGFA,FNTA,HNRNPK,ARHGAP29,ZNF16,STAC3,SMAD3,RALB,TAOK2,LMO4,ERBB3,NLRP1,POLG2,CAPRIN2,TGFB1,RTN4R,NOS1AP,PTK2,VDR,STK4,RARA,SOS2,MIR15A,MIR16-1,DAB2IP,CACNA1D,TOR1AIP1,STK11,FZD2,RAP1GDS1,PTGES3,PDCD6,TBC1D17,C5AR1…	c5_GO.Biological.Process	0.0184003	0.251635	0.352488	0.162914	1.23213	917	MAP2K7,DVL2,AXL,CCND1,ZBTB7A,DLG3,MAP3K11,SIPA1,MAPKAPK5,SGSM2,GSK3A,TERF2IP,UHRF1,UBE2L3,ANTKMT,CACUL1,PRKAG1,TRIM8,BAD,FZR1,DDX3X,LAT,HCLS1,CARD9,GSN,MIR195,AGRN,CTSK,ARHGEF16,TRIB3,LGR4,GAS6,RGP1,ISCU,MERTK,ARID5B,DOK7,BAX,ATP2A1,HTRA2,CEBPG,LRP1,TGFB1,CAV1,TRIM52,ITGB2,PDGFC,CACNA1D,CNPY2,SGK2,PRKD2,DNAJB11,FDX2,CD4,KCTD7,MYC,RPTOR,FZD1,MIR15A,MIR16-1,EIF3E,COA8,RASGRP2,HSPE1,HSPD1,RGL3,NOS2,…	c5_GO.Biological.Process
GOBP_OLEFINIC_COMPOUND_BIOSYNTHETIC_PROCESS	0.000564956	0.0293086	0.477271	0.634699	2.07291	18	ADM,H6PD,EGR1,BMP6,STARD3,BGLAP,DKK3,LHB,DGKQ,CACNA1H,CREB1,DKKL1,HSD17B1	c5_GO.Biological.Process	0.492754	0.816762	0.0817516	0.276494	0.950964	17	CLCN2,HSD17B1,WNT4,STARD3	c5_GO.Biological.Process
AKT(PKB)-Bad signaling ( EPO signaling pathway(JAK2 STAT1 STAT3 STAT5) ); datasource: inoh;	0.000572789	0.0750354	0.477271	0.320886	1.69314	144	BAD,PAK6,MAP4K2,EGFR,PRKCH,MAPK10,IGF1R,MET,BMPR1B,CDK3,PTK2,RPS6KA3,JAK1,ACVR2B,PRKCD,MAPK8,GRK6,IKBKB,MAPK9,RPS6KA2,NGFR,PLK3,MAPK11,MAPK12,PRKCZ,PRKAG1,PRKAR1A,MAP3K10,MKNK1,BMPR2,PDGFRA,AKT2,GRK4,PRKCG,FGFR2,RIPK1,NTRK1,MAPK3,PRKCA,PRKCE,ACVR1B,MAP3K11,YWHAQ,PDPK1,SYK,MAPK13,ACVR2A,TGFBR1,PAK5,CSNK1E,RAF1,PRKCI,MAP3K14,RPS6KB2,CSNK1D,TEC,MAP2K7,MAP3K12	PathwayCommons11	0.069395	0.583294	0.227987	0.212578	1.27357	151	MAP2K7,WEE1,MAP3K11,MAPKAPK5,GSK3A,CDK3,PRKAG1,RPS6KB2,BAD,BMPR1B,RPS6KB1,PRKAR1B,ACVR2B,CSNK1A1,PRKCE,CSNK1E,CDK2,MAP4K2,MAPK11,MAPK12,JAK3,FGFR4,RPS6KA2,CAMK2G,PAK6,AKT2,PRKCD,MAPK9,MAPK14,IRAK1,TGFBR2,NGFR,RAF1,CSNK1G2,GRK6,LTK,BRAF,NTRK1,IKBKE,MAPK3,FGFR2,PRKCZ,PRKAB2,GRK4,BTK,MAP2K4,MAP3K5,ACVR1B,FGFR3,BMPR2,GRK2,IRAK2,RIPK1,MAP4K3,MTOR,CDK9,CSNK1D	PathwayCommons11
AKT(PKB)-Bad signaling ( IL-7 signaling(JAK1 JAK3 STAT5) ); datasource: inoh;	0.000572789	0.0750354	0.477271	0.320886	1.69314	144	BAD,PAK6,MAP4K2,EGFR,PRKCH,MAPK10,IGF1R,MET,BMPR1B,CDK3,PTK2,RPS6KA3,JAK1,ACVR2B,PRKCD,MAPK8,GRK6,IKBKB,MAPK9,RPS6KA2,NGFR,PLK3,MAPK11,MAPK12,PRKCZ,PRKAG1,PRKAR1A,MAP3K10,MKNK1,BMPR2,PDGFRA,AKT2,GRK4,PRKCG,FGFR2,RIPK1,NTRK1,MAPK3,PRKCA,PRKCE,ACVR1B,MAP3K11,YWHAQ,PDPK1,SYK,MAPK13,ACVR2A,TGFBR1,PAK5,CSNK1E,RAF1,PRKCI,MAP3K14,RPS6KB2,CSNK1D,TEC,MAP2K7,MAP3K12	PathwayCommons11	0.069395	0.583294	0.227987	0.212578	1.27357	151	MAP2K7,WEE1,MAP3K11,MAPKAPK5,GSK3A,CDK3,PRKAG1,RPS6KB2,BAD,BMPR1B,RPS6KB1,PRKAR1B,ACVR2B,CSNK1A1,PRKCE,CSNK1E,CDK2,MAP4K2,MAPK11,MAPK12,JAK3,FGFR4,RPS6KA2,CAMK2G,PAK6,AKT2,PRKCD,MAPK9,MAPK14,IRAK1,TGFBR2,NGFR,RAF1,CSNK1G2,GRK6,LTK,BRAF,NTRK1,IKBKE,MAPK3,FGFR2,PRKCZ,PRKAB2,GRK4,BTK,MAP2K4,MAP3K5,ACVR1B,FGFR3,BMPR2,GRK2,IRAK2,RIPK1,MAP4K3,MTOR,CDK9,CSNK1D	PathwayCommons11
GOBP_REGULATION_OF_CELL_CELL_ADHESION	0.000573353	0.0295432	0.477271	0.267867	1.55068	300	BAD,MBP,SMARCD2,LYN,FSTL3,SMAD7,MIR141,PTPN6,FLOT2,BMP4,AP3D1,ACTB,ARG2,BCL6,JAG1,FUT4,HAS2,NF2,MIRLET7E,MIR125A,FUT7,SOX12,TGFB1,F11R,PTK2,DHPS,RARA,CITED2,PIEZO1,BMP6,JAK1,NRARP,SH2B3,SHB,CELSR2,CEBPB,RHOH,PRKCD,YTHDF2,ABL1,EMILIN1,RUNX1,RELA,CD27,CORO1A,ARID1B,TNFAIP8L2,FOXJ1,NFKBIZ,ARID1A,PPP3CA,KITLG,SOX13,SPI1,NCKAP1L,FOXP3,IL4I1,PRKCZ,PRKAR1A,ZBTB7B,EFNB3,TNFSF4,KAT5,IL1B,SMARCC1,ARID2,EPH…	c5_GO.Biological.Process	0.0665499	0.427837	0.231127	0.182615	1.25213	314	NFAT5,MIR141,PTPN6,BAD,SMAD7,ZBTB7B,CEBPB,ALOX12,PPARA,FUT7,LOXL3,TGFB1,F11R,TNFSF9,CAV1,TNFRSF13C,MARCHF7,NOTCH1,ITGB2,CD4,DHPS,ACTB,WNK1,HSPD1,AP3D1,RASAL3,FERMT3,ABL1,CCDC88B,CARD11,SWAP70,XBP1,VAV1,MDK,JAK3,CELSR2,CASP3,SOX2,EFNB3,NCKAP1L,PPM1F,RASGRP1,EPHB3,FOXA1,BMP4,SMARCE1,PIEZO1,MIRLET7E,MIR125A,RELA,NFKBID,FSTL3,ZNF703,PRKCD,AMBRA1,CX3CL1,CDH1,FLOT2,PTPN11,CD47,WNT4,SOCS1,MAPK14,STAT5B,…	c5_GO.Biological.Process
GOBP_SKIN_EPIDERMIS_DEVELOPMENT	0.000590097	0.0302019	0.477271	0.371277	1.81465	94	EDAR,EGFR,LSR,PLEC,DKK1,MET,PDGFA,HOXC13,WNT10A,CYP26B1,FOXE1,TP63,ELOVL1,SOX9,GRHL3,RELA,SFN,NFKBIZ,NGFR,ERCC2,SOSTDC1,GORAB,KRT17,EXT1,FOXN1,SRF,FGFR2,LGR4,ACVR1B,CYSRT1,HDAC2,LAMA5,ALOXE3,NOTCH1,FUZ,NF1,FST,UGCG,NAGLU,TGFB2,NUMA1,FOXQ1	c5_GO.Biological.Process	0.0131727	0.216639	0.38073	0.276055	1.56768	102	ALOX12B,INHBA,ALOX12,LGR4,LDB1,NAGLU,HOXC13,NOTCH1,SOX18,CDH3,FOXE1,SOX21,ELOVL1,WNT10A,LSR,NF1,RELA,CD109,SMO,TRADD,FOXI3,ERCC2,PIAS4,NGFR,FUZ,HDAC2,TRPC4AP,ALOXE3,LRP4,FGFR2,FOXQ1,PDGFA,FZD3,ACVR1B,ZDHHC21,GRHL1,NFKBIZ,KRT16,SNAI1,DLX3,GAL	c5_GO.Biological.Process
WP_OSX_AND_MIRNAS_IN_TOOTH_DEVELOPMENT	0.000591918	0.0652853	0.477271	0.58897	2.01835	21	DKK1,MIRLET7A1,MIRLET7D,MIRLET7F1,MIRLET7E,MIR29B1,MIRLET7I,MIR586,RUNX2,MIRLET7F2,NOTCH1,NOTCH3	c2_curated.Canonical.Pathways	0.0360237	0.340739	0.321776	0.414637	1.53668	21	NOTCH3,NOTCH1,MIR338,MIR34AHG,MIRLET7E,MIR29B1,MIRLET7C,MIRLET7I,BMP7	c2_curated.Canonical.Pathways
KEGG_INSULIN_SIGNALING_PATHWAY	0.000600982	0.0652853	0.477271	0.355097	1.77639	106	BAD,PIK3CD,RHOQ,FLOT2,MAPK10,SH2B2,CBLC,PPP1R3D,SOS2,MAPK8,SOCS2,NRAS,PHKA2,IKBKB,SREBF1,KRAS,PTPN1,MAPK9,SHC1,PRKCZ,IRS1,PHKG2,PRKAG1,PRKAR1A,RPTOR,PYGL,MKNK1,CALM3,AKT2,MAPK3,INPP5K,PPP1CA,PIK3R3,ACACB,PDPK1,RHEB,CBLB,PHKA1,RAF1,PRKCI,RPS6KB2,PIK3R2,CALML3,MKNK2	c2_curated.Canonical.Pathways	0.220472	0.632621	0.128789	0.203548	1.15947	108	GYS1,PYGB,PRKAG1,RPS6KB2,GYS2,BAD,SHC1,FASN,RPS6KB1,NRAS,MKNK2,PRKAR1B,RPTOR,EXOC7,PYGM,PIK3R2,EIF4EBP1,AKT2,FLOT2,MAPK9,SOCS1,RAF1,RHOQ,SOCS2,TSC1,BRAF,SH2B2,MAPK3,PRKCZ,PRKAB2,PRKX,PHKA2,MTOR,SHC2,CRK,INPP5K,PIK3CD,MAP2K2,PDPK1,SREBF1,IRS4,TSC2,INS,PPP1CC,PHKG2	c2_curated.Canonical.Pathways
REACTOME_RNA_POLYMERASE_II_TRANSCRIPTION	0.000603854	0.0652853	0.477271	0.208993	1.35339	1060	TBL1XR1,ZNF75A,ZNF460,TNFRSF18,MEN1,ZNF140,TP53RK,ZNF605,MAPKAP1,SMARCD2,EGFR,CHD3,SRRT,GTF2A1,MED31,SMAD7,SP1,ZNF517,PPP1R13L,ZNF564,ZNF709,ZNF490,ZNF443,ZNF799,CHD4,NOP2,ZNF567,PCF11,SRSF2,BTG1,CDKN1B,SESN1,NR4A2,TEAD3,TFAP2A,NR1D1,ZNF383,ZNF585A,ZNF585B,ELL,SUPT16H,SNAPC4,BCL6,MET,JAG1,MED13,SKIL,SNAPC5,RAD9A,RMI1,PML,SMAD3,CSF2,TMEM219,H2AX,KCTD15,MOV10,TGFB1,SETD1B,PHC3,INTS2,BRIP1,VDR,LAMTO…	c2_curated.Canonical.Pathways	0.0858506	0.47274	0.191892	0.149835	1.1445	1097	RBX1,ZNF213,PSMC3,ZNF606,CCND1,NR3C1,NR2C2,PRMT1,MAPKAPK5,TNRC6B,PRMT5,USP7,COX19,MTA2,CHD3,NR6A1,PSMB6,PRKAG1,KMT2D,MOV10,NOTCH3,ZSCAN32,FZR1,SNAPC2,SMAD7,RFFL,RAD51D,SNAPC4,CEBPB,CHD4,NOP2,MED26,CGB8,NRBF2,BRCA1,ZNF140,ZNF566,CTSK,ARNT,ZNF605,TFAP2A,BRPF1,PPP1R13B,NR2F6,PPARA,GTF2F1,U2AF2,RBM14,ZNF555,BAX,CDC40,LDB1,SOD2,COX7A2L,ELL3,BANP,KAT2A,TGFB1,PSMD8,CAV1,CCNT1,INTS11,HDAC7,NOTCH1,PSMD3,Z…	c2_curated.Canonical.Pathways
GOBP_RESPONSE_TO_PEPTIDE	0.000606008	0.0308094	0.477271	0.256838	1.52523	366	SCNN1A,CTSD,ZNF106,ADM,FOSL2,LYN,RHOQ,NFE2L2,SP1,MIR200C,CDKN1B,NR4A2,INAVA,EGR1,IGF1R,NPR2,SH2B2,CYP1B1,CARD9,JAG1,MIRLET7F1,FUT7,TNS2,NLRP1,USF1,PTK2,BRIP1,MBD5,SOS2,JAK1,STK11,RAP1GDS1,LTA4H,PRKCD,SLC27A4,PKM,CAV2,TRIB3,CFLAR,KHK,SOCS2,STAT6,RELA,SLC9A1,SREBF1,NFKBIA,PTPN1,ARID1B,MDM2,GRIN1,NOD1,PPP3CA,GRB7,SHC1,NGFR,GPT,PRKCZ,BGLAP,IRS1,PXN,NCOA5,ZNF592,PRKAR1A,ZBTB7B,TP53,ZFP36L1,PPP1R9B,IL1…	c5_GO.Biological.Process	0.0910714	0.476118	0.197822	0.171387	1.19045	377	GSK3A,MIR200C,SLC2A1,INHBA,SHC1,TRIM41,ZBTB7B,CARD9,RPS6KB1,MIR195,CTSK,PPARA,RBM4,TRIB3,NPR2,ANO1,FUT7,AGTRAP,FOXC2,MMP2,LRP1,STAT6,USF1,CAV1,NOTCH1,STC2,SRSF6,GNRHR2,ZNF592,EIF6,GCLC,CHMP5,KBTBD2,BACE1,EPHA4,INAVA,BSG,PIK3R2,INSRR,RPL23,ARHGEF2,SCAP,AGRP,CITED1,XBP1,JAK3,EIF2B5,TP53,MYO5A,FGF21,ATP1A3,SNX5,GNAI2,AKT2,GRB7,NONO,RELA,SLC2A8,FOS,PRKCD,INPPL1,ADCY6,CACNB1,STK11,SLC27A1,GJB2,PTPN11,…	c5_GO.Biological.Process
GOBP_POSITIVE_REGULATION_OF_HEMOPOIESIS	0.000612256	0.0309209	0.477271	0.342081	1.76066	130	BAD,AXL,SMARCD2,ID2,AP3D1,ACTB,BCL6,SOX12,TGFB1,RARA,SHB,RHOH,RUNX1,CD27,ARID1B,NFKBIZ,ARID1A,PPP3CA,KITLG,SOX13,SPI1,NCKAP1L,FOXP3,IL4I1,PRKCZ,CSF1,ZBTB7B,ZFP36L1,RPTOR,TNFSF4,KAT5,FOS,SMARCC1,ARID2,CASP8,MDK,HCLS1,RIPK1,PRKCA,ZBTB46,IL15RA,TOX,PCID2,SYK	c5_GO.Biological.Process	0.238361	0.663423	0.119348	0.188275	1.1284	137	AXL,ACIN1,BAD,ZBTB7B,HCLS1,GAS6,HAX1,TGFB1,TNFSF9,CD4,ACTB,RPTOR,LIF,AP3D1,XBP1,MDK,NCKAP1L,RASGRP1,SMARCE1,NEDD9,TYROBP,NFKBID,FOS,AMBRA1,SOCS1,XRCC6,STAT5B,SMARCD2,TGFBR2,ACTL6B,SMARCA2,IL34,MALT1,ADAM8,SHB,PRKCZ,KAT5,LGALS9,BTK,BTN2A2,PBRM1,PCID2,CBFB	c5_GO.Biological.Process
PID_E2F_PATHWAY	0.000641109	0.0663877	0.477271	-0.401875	-1.91362	61	MCM3,TP73,E2F1,CDKN1A,CES2,CES3,CDKN2C,CDC25A,RBL1,CDK1,MYBL2,TFDP1,CASP7,TOPBP1,TYMS,ATM,RRM2,KAT2A,E2F3,ORC1,UXT,TFDP2,PLAU,CDC6,POLA1,E2F7,TRRAP,TRIM28	c2_curated.Canonical.Pathways	0.222445	0.636061	0.129443	-0.222835	-1.14023	64	TP73,TFDP2,MCM3,CDC6,CDC25A,CDK1,TFDP1,E2F5,CCNA2,DHFR,E2F7,RBL1,CCNE1,RRM2,RBBP4,E2F3,CDKN1B,UXT,TK1,TOPBP1,CDKN2C,E2F6,APAF1	c2_curated.Canonical.Pathways
GOBP_HEART_DEVELOPMENT	0.000645557	0.0323883	0.477271	0.254705	1.53721	436	BCOR,HEXIM1,ADM,NCOA6,IFT122,EGFR,TNFRSF1A,PLEC,ID2,SMAD7,PTK7,GLI1,EFNA1,PPP1R13L,TNNT2,PDLIM2,BMP4,CDKN1B,DKK1,IGF1R,ECE1,JAG1,POU6F1,HAS2,SMAD3,LMO4,CRIP1,ERBB3,PRICKLE4,NEK8,TGFB1,PTK2,MKKS,STK4,RARA,CITED2,SOX6,TCAP,ACVR2B,IFT140,FZD2,PRICKLE1,ABL1,SOX9,EMILIN1,DVL1,RUNX1,TBX2,IFT25,GRHL2,SLC9A1,DHRS3,LUZP1,VEGFB,MDM2,ANKS6,RPS6KA2,FOXJ1,SOD2,DNAAF3,TNNI3,POPDC3,NDST1,SHC1,MYBPC3,RGS2,FOXP1,…	c5_GO.Biological.Process	0.143101	0.573071	0.151149	0.16009	1.13842	457	DVL2,KDM6B,PRMT1,GYS1,PTK7,GSK3A,INHBA,SPRY1,CLUAP1,CBY1,SHC1,SMAD7,ECE1,MIR195,PPARA,NEK8,HEXIM1,SOD2,FOXC2,NAGLU,MMP2,KAT2A,TGFB1,ELN,ACVR2B,TBX6,NOTCH1,ODAD4,SOX18,PTCH1,PDE2A,FZD1,WNK1,EPOR,RARB,EIF4G2,VEGFB,ABL1,FKBP1A,MKS1,MAPK11,CASP3,AKAP13,MKKS,PDLIM2,TP53,ZFPM1,CRELD1,GRHL2,TBX2,EFNA1,SH3PXD2B,FZD2,ADAM15,RPS6KA2,HEG1,NPRL3,PPP1R13L,OVOL2,JMJD6,DSG2,BMP4,MED1,NF1,SOX6,TBX1,MEIS1,CDC42,S…	c5_GO.Biological.Process
FoxO.Signaling	0.000647715	0.00683045	0.477271	0.410943	1.81974	66	EGFR,PIK3CD,CDKN1B,MAPK10,IGF1R,BCL6,SMAD3,TGFB1,SOS2,STK11,MAPK8,NRAS,IKBKB,KRAS,MDM2,MAPK9,SOD2,RBL2,MAPK11,MAPK12,IRS1,CCND1,AKT2,MAPK3,CCND2,PIK3R3	NanoString_Genes	0.217647	0.60112	0.129443	0.2281	1.16409	65	CCND1,NRAS,SOD2,TGFB1,SGK2,CDK2,PIK3R2,MAPK11,MAPK12,RBL2,CREBBP,AKT2,CDKN2D,STK11,MAPK9,MAPK14,TGFBR2,RAF1,EP300,FOXO4,BRAF,MAPK3	NanoString_Genes
REACTOME_HCMV_LATE_EVENTS	0.000649139	0.0663877	0.477271	-0.366652	-1.8177	72	NUP54,NUP155,H2BC17,H3C12,H2AC17,NUP210,SEH1L,MVB12B,NUP35,NUP43,NUP98,POM121C,CEBPD,NUP58,VPS4A,VPS37B,CHMP4B,NUP133,VPS28,VPS37A,NUP214,VPS37D,RAE1,SNF8,NUP42,H4C13,H3C11,VPS25,TPR,TSG101,NDC1,RANBP2,NUP37,H2BC11,H2AC11	c2_curated.Canonical.Pathways	4.62411e-21	1.7493e-17	1.18665	-0.599103	-3.4269	104	H4C8,H2AC11,H3C3,H2BC3,H2BC4,H2AC6,H4C2,H2BC11,H4C3,NUP155,H2AC16,H4C5,H3C4,H2BC7,H2AC7,H4C13,H3C11,H4C1,H3C1,H2BC13,H3C10,H2AC13,H2BC14,H2AC14,H2AC12,H2BC12,VPS37B,H3C2,H2AC4,H2BC9,H3C7,H3C8,H2BC10,H2AC20,H3C6,H2BC17,H3C12,H2AC17,SEH1L,H4C16,NUP35,H2BC15,H2AC15,NUP37,H2AC25,NUP210,NDC1,NUP54,TPR,NUP133,HNRNPK,H2BC8,H2AC8,NUP153,VPS37C,H2BC21,H2AC21	c2_curated.Canonical.Pathways
GOBP_C21_STEROID_HORMONE_BIOSYNTHETIC_PROCESS	0.000654698	0.0326322	0.477271	0.679458	2.04117	14	ADM,EGR1,BMP6,STARD3,DKK3,LHB,DGKQ,CACNA1H	c5_GO.Biological.Process	0.905622	0.968035	0.0503964	-0.202925	-0.646952	13	AKR1B1,ADM,DGKQ,REST,DKK3	c5_GO.Biological.Process
Glucocorticoid receptor regulatory network; datasource: pid;	0.000674798	0.0815291	0.477271	0.412472	1.87487	66	MAPK10,EGR1,CSF2,KMT5B,SUMO2,NR3C1,MAPK8,RELA,NFATC2,SFN,MDM2,MAPK9,SPI1,BAX,MAPK11,BGLAP,JUN,TP53,FOS,SMARCC1,KRT17,PPP5C,POU2F1,NCOA2,NFATC1,MAPK3,HDAC2,SMARCC2,EP300,NR4A1,IL5,IRF1,HSP90AA1,CREB1,SMARCD1	PathwayCommons11	0.301645	0.806824	0.102822	0.220327	1.10526	63	NR3C1,SUMO2,BAX,MAPK11,HSP90AA1,TP53,CREBBP,PPP5C,RELA,FOS,MAPK9,MAPK14,STAT5A,STAT5B,EP300,HDAC2,KMT5B,TBP,NCOA1,MAPK3	PathwayCommons11
TNFs bind their physiological receptors; datasource: reactome;	0.000678938	0.0815291	0.477271	0.637425	2.01514	15	TNFRSF18,EDAR,TNFRSF1A,TNFRSF25,CD27,TNFSF13,TNFSF4,TNFRSF6B,TNFRSF4,TNFSF8	PathwayCommons11	0.153696	0.653238	0.156312	0.433373	1.31984	11	TNFSF13,TNFSF9,TNFRSF25,TNFRSF1A,CD27	PathwayCommons11
GOBP_CELLULAR_RESPONSE_TO_EXTRACELLULAR_STIMULUS	0.000694553	0.0341792	0.477271	0.289595	1.61017	216	GABARAPL2,CYP27B1,AXL,MAPKAP1,GABARAP,SLC38A2,USF2,LYN,PLEC,NFE2L2,ATG14,SP1,SESN1,NR4A2,IGF1R,RALB,STK24,USF1,BRIP1,VDR,LAMTOR1,GABARAPL1,ULK1,WDR24,MAPK8,YWHAZ,KPTN,TNRC6A,SREBF1,FLCN,MDM2,RICTOR,CPEB4,DSC2,CD68,TSSK1B,BGLAP,RXRA,PRKAG1,TP53,WDR59,RPTOR,PPP1R9B,KAT5,FOS,GAS2L1,BMPR2,ARHGAP35,SRF,ATF4,ATG5,MAPK3,PIM1,YWHAG,SIPA1,ITFG2,FBXO22,RNF167,ATF3,PRR5,HSPA8,RHEB,SH3GLB1,TFEB,TNC,MLST8,EP3…	c5_GO.Biological.Process	0.0240093	0.281473	0.352488	0.219103	1.41312	214	GABARAP,AXL,SIPA1,KPTN,CD68,SLC2A1,PRKAG1,ADNP,TLE5,RPS6KB1,CLEC16A,CTSK,PPARA,GAS6,USF1,CSNK1A1,YWHAZ,RNF167,RPTOR,BECN1,PRR5,XBP1,WNT2B,STK24,USF2,TP53,NPRL3,CREBBP,MED1,FNIP1,SLC39A5,NONO,ASNS,FOS,FOLR2,ATXN3,GAS2L1,COMT,AMBRA1,TSSK6,FLCN,WNT4,HSPA8,UCP2,RIPOR1,FBXO22,RRAGD,KANK2,ULK1,SLC38A2,OGT,MLST8,EP300,MYBBP1A,MFSD2A,BRIP1,DSC2,TSC1,CYP27B1,NFE2L2,NCOA1,MAPK3,PRKAB2,KAT5,JMY,ATF4,WDR59,M…	c5_GO.Biological.Process
WP_GLUCOCORTICOID_RECEPTOR_PATHWAY	0.000699638	0.066773	0.477271	0.435008	1.87857	52	CDC42EP3,SCNN1A,THBD,IL11,PTGES3,NR3C1,SEC14L1,SERTAD2,CPEB4,RGS2,JUN,STOM,RXRA,EPB41L4B,AMIGO2,PRRG4,SLC19A2,TNS4,AKAP13,TGFBR3,GPR153,HSP90AA1,DNAJC15	c2_curated.Canonical.Pathways	0.30315	0.713786	0.10714	0.231122	1.10505	48	NR3C1,SERPINB9,SPRY1,IL11,CDC42EP3,HSP90AA1,NFKB2,AKAP13	c2_curated.Canonical.Pathways
GOBP_REGULATION_OF_PHOSPHORYLATION	0.000700494	0.0341792	0.477271	0.222181	1.40039	746	BAD,AXL,TNFRSF18,MEN1,MAP4K2,HEXIM1,EEF1A1,MAPKAP1,EGFR,TNFRSF1A,CACTIN,PLXNB2,LYN,ATG14,SMAD7,TFAP4,EFNA1,PTPN6,BMP4,CDKN1B,DKK1,ACTB,PTPN13,IL11,TRIM65,EGR1,IGF1R,AKT1S1,HMGA2,NOP53,MET,CBLC,PDGFA,CLCF1,ZNF16,NF2,RALB,CSF2,TAOK2,LMO4,ERBB3,FKBP8,CAPRIN2,TGFB1,PTK2,TESK1,SPAG9,STK4,MIR15A,DAB2IP,BMP6,AIDA,MACROH2A1,STK11,MOB3A,FGF5,PTGES3,CLN3,C5AR1,LRRK1,PRKCD,ATP2B4,ABL1,SOX9,TTC36,TRIB3,UBE2K…	c5_GO.Biological.Process	0.000150867	0.0164467	0.518848	0.196916	1.46439	755	MAP2K7,DVL2,AXL,CCND1,DLG3,MAP3K11,PKN1,PPP1R14B,GSK3A,PTPN6,TERF2IP,INHBA,SPRY1,CACUL1,PRKAG1,TBK1,BAD,NIBAN1,SMAD7,DDX3X,ADNP,LAT,HCLS1,NDUFS4,INCA1,FKBP8,MIDN,TRIB3,GAS6,CTDSP2,MERTK,CLN3,CREBL2,IL11,HAX1,DOK7,HEXIM1,BAX,LDB1,MACROH2A1,CHMP6,CCNF,PRKAR1B,ZFYVE28,TGFB1,CAV1,CCNT1,NSD1,ITGB2,PDGFC,NHLRC1,CNKSR3,ZNF592,CD4,RABGEF1,ACTB,RPTOR,FZD1,LIF,QARS1,MIR15A,PRKCE,HRC,PPP2R5B,PLXNB2,ADCY10,A…	c5_GO.Biological.Process
GOBP_MUSCLE_ORGAN_DEVELOPMENT	0.000701707	0.0341792	0.477271	0.281933	1.59113	247	PLEC,SMAD7,TNNT2,BMP4,CAPN3,UNC45A,EGR1,MYLK,BCL9L,PRR14,POU6F1,STAC3,SMAD3,ERBB3,EFEMP2,DDX5,TGFB1,CITED2,HDGFL2,CD164,CYP26B1,SOX6,TCAP,MKX,FZD2,KMT5B,CAV2,CFLAR,ZNF609,YBX3,VPS54,KRAS,DDX17,TNNI3,POPDC3,PPP3CA,MYBPC3,MSX1,PKP2,MAPK12,SERP1,GPCPD1,SRPK3,MYL11,ARID5B,FOS,CFL2,EMD,CNTNAP1,AKIRIN1,FOXN2,CACNA1H,CCNT2,NOG,KLF5,ZBTB18,FGFR2,CRYAB,TPM1,ANKRD2,NR2F2,CDON,ASS1,ENG,FBXO22,ATF3,TCF12,S1P…	c5_GO.Biological.Process	0.110899	0.523801	0.184706	0.181877	1.19756	249	MYMX,GPC1,SMAD7,MRTFB,RPS6KB1,MIR195,USP19,ARID5B,PRR14,FOXC2,HSD17B1,NAGLU,AKIRIN1,TGFB1,ELN,CAV1,NOTCH1,SVIL,FZD1,LIF,BMAL1,FKBP1A,MKX,MAPK12,HDGFL2,XBP1,SIX4,ZFPM1,SFMBT1,FZD2,HEG1,CFL2,BMP4,MED1,ZFHX3,NF1,ITGB1BP2,SOX6,TBX1,FOS,FGFRL1,SMO,FOXC1,DMRTA2,DDX17,STAC3,FBXO22,MAPK14,CTF1,HOXD10,FKTN,VPS54,DLL4,EP300,CAV2,SOX15,EID2B,TCAP,ADGRB1,FOXO4,TCF12,TNNT2,KMT5B,MYL3,EFEMP2,NKX2-5,LOX,MYL11,S…	c5_GO.Biological.Process
GOBP_FAT_CELL_DIFFERENTIATION	0.000703663	0.0341792	0.477271	0.294919	1.60454	188	TBL1XR1,ADIRF,FOSL2,CTBP1,ID2,ZFP36L2,WNT5B,NR4A2,IL11,NPR2,SH2B2,NR1D1,HMGA2,JAG1,SMAD3,TGFB1I1,TGFB1,MKKS,STK4,CEBPB,MIR29B1,TRIB3,ZBTB7A,PER2,SREBF1,ZBTB7C,FLCN,SOD2,SOX13,RGS2,ATF5,ZBTB7B,CCND1,ZFP36L1,ARID5B,FBXO9,PDGFRA,AKT2,ERAP1,LAMB3,TTC8,MIR27B,TRPM4,KLF5,PIM1,SYAP1,SORT1,ZFP36,WDFY2,SDF4,CARM1,TMEM120B,ASXL1,ALOXE3,STK3,NIPBL,BSCL2,WWTR1,MIR181A2,TCF7L2,EP300,NR4A1,MED1,CREBL2,AAMDC,ZN…	c5_GO.Biological.Process	0.260223	0.684475	0.113313	0.173277	1.09505	186	CCND1,ZBTB7A,CBY1,ZFP36,ZBTB7B,CEBPB,TRIB3,NPR2,CREBL2,IL11,ARID5B,SOD2,CTBP1,TGFB1,ZNF385A,AAMDC,BMAL1,WNT5B,CTBP2,XBP1,MKKS,ADIG,BBS1,BBS2,AKT2,MED1,LRP3,E2F1,CLIP3,SENP2,FLCN,MIR29B1,LRP5,SOCS1,MAPK14,RETREG1,BSCL2,PEX11A,ZFP36L2,EP300,ADIRF,CCDC85B,GATA2,WWTR1,BMP7,SH2B2,PLAC8,SMAD6,ALOXE3	c5_GO.Biological.Process
WP_MICRORNA_NETWORK_ASSOCIATED_WITH_CHRONIC_LYMPHOCYTIC_LEUKEMIA	0.000712186	0.066773	0.477271	0.883494	1.9003	5	MIR15A,MIR16-1,MCL1,ADAMTSL4-AS1,TP53	c2_curated.Canonical.Pathways	0.01561	0.218989	0.38073	0.73344	1.78696	6	MCL1,ADAMTSL4-AS1,MIR15A,MIR16-1,TP53	c2_curated.Canonical.Pathways
GOBP_NEUROGENESIS	0.000713649	0.0344449	0.477271	0.205645	1.33827	1191	AXL,PAK6,METRN,ADM,NKX2-8,EHD1,EVX1,TSKU,EGFR,ACSL4,PLXNB2,LYN,SRRT,PLEC,MXRA8,NFE2L2,ID2,CUL7,PTK7,EFNA1,FSCN2,MIR200C,ZSWIM6,ANXA2,SEMA4B,BMP4,PRKCH,WNT5B,DKK1,RAC3,HAPLN4,ACTB,NR4A2,SPAST,APLP2,IGF1R,TEAD3,TULP1,NPR2,CUX1,NSMF,NR1D1,BCL6,ECE1,MET,KLK8,JAG1,ISLR2,SKIL,HOOK3,CLCF1,SEMA3B,NF2,ABCA2,TAOK2,STK24,CAMSAP1,LMO4,ERBB3,BMPR1B,FKBP8,NYAP1,HOXA2,CAPRIN2,STMN3,MOV10,WNT10A,TGFB1,RTN4R,PTK2…	c5_GO.Biological.Process	1.42405e-05	0.00493951	0.593325	0.18924	1.47017	1234	DVL2,AXL,THAP11,CCND1,WEE1,NR3C1,PRMT1,BLOC1S3,EHD1,CAPRIN1,MAPKAPK5,ATP9A,PTPN9,CUL7,PTK7,NAPA,PRMT5,RTN4RL2,PAFAH1B1,GSK3A,MIR200C,INHBA,METRN,MOV10,STX3,NOTCH3,GPC1,NTN3,TBC1D24,JAG2,FSCN2,CECR2,ADNP,ECE1,CEBPB,GPR157,TPRN,BMPR1B,RETREG3,NAV1,TPPP,AGRN,UST,FKBP8,PAX2,CPNE9,ESRP1,NR2F6,CLCN2,EPHA10,LAMB2,GAS6,NPR2,GBA2,BTBD2,ANO1,AVIL,PRDM12,CTNNA1,BAX,WASF1,LDB1,C12orf57,SOD2,ZNF296,NAGLU,HTRA…	c5_GO.Biological.Process
REACTOME_RUNX1_AND_FOXP3_CONTROL_THE_DEVELOPMENT_OF_REGULATORY_T_LYMPHOCYTES_TREGS	0.000729663	0.066773	0.477271	0.882436	1.89803	5	TNFRSF18,RUNX1,NFATC2,FOXP3	c2_curated.Canonical.Pathways	0.64881	0.873611	0.0655321	-0.417418	-0.851422	4	FOXP3	c2_curated.Canonical.Pathways
GOBP_ENDOCRINE_SYSTEM_DEVELOPMENT	0.000732314	0.0351234	0.477271	0.357445	1.75411	100	BAD,GLI1,BMP4,CYP1B1,HOXA3,SMAD3,HOXA5,CITED2,BMP6,FOXE1,NR3C1,SOX9,HOXB3,NKX2-1,BAK1,DKK3,GIPR,ARID5B,MDK,PDGFRA,IL6R,SRF,NOG,HIPK2,MAPK3,FGF2,WNT11,PDPK1,SOX2,RHEB,TGFBR1,SMAD2,RAF1,OTP,FOXA2,CTNS,TBX1,NF1,CREB1	c5_GO.Biological.Process	0.111321	0.523801	0.183024	0.223024	1.25874	99	NR3C1,GSK3A,BAD,ARID5B,HOXA3,HOXA5,LHX3,HOXD3,BMAL1,FOXE1,MDK,SOX2,BMP4,NF1,TBX1,WNT11,CDH1,SMO,WNT4,FOXI3,RAF1,GATA2,HOXB3,FGF2,BRAF,NKX2-5,MAPK3	c5_GO.Biological.Process
WP_TH17_CELL_DIFFERENTIATION_PATHWAY	0.000732529	0.066773	0.477271	0.440609	1.87575	48	CD247,NR1D1,TGFB1,RARA,JAK1,MAPK8,RUNX1,STAT6,IKBKB,NFKBIA,PPP3CA,FOXP3,JUN,RXRA,IL1B,FOS,IL6R,NFATC1,TGFBR1,SMAD2,LAT	c2_curated.Canonical.Pathways	0.917836	0.971268	0.0496901	-0.153102	-0.723393	46	STAT1,FOXP3,PER1,NR1D1,PRKCQ,SMAD2,CRY1,IL4R,PPP3CA,IFNGR1,JUN	c2_curated.Canonical.Pathways
WP_ROLE_OF_HYPOXIA_ANGIOGENESIS_AND_FGF_PATHWAY_IN_OA_CHONDROCYTE_HYPERTROPHY	0.000741138	0.066773	0.477271	0.497449	1.9897	37	FOSL2,FOSB,GANC,LAMTOR1,CEBPB,SOX9,RELA,P4HTM,JUNB,JUN,FOS,RUNX2,AKT2,FGFR2,NTRK1,MAPK3,PRKCA	c2_curated.Canonical.Pathways	0.234592	0.646368	0.125033	0.265927	1.16857	37	RELB,CEBPB,ARNT,JUND,FOSB,FGFR4,AKT2,RELA,FOS,NTRK1,MAPK3,HIF1A,FGFR2,FGFR3,EPAS1,COL1A1,VHL	c2_curated.Canonical.Pathways
Early.B.cell.factors.IPT.domain.containing	0.000758696	0.116948	0.477271	-0.964432	-1.72542	3	EBF4,EBF1,EBF2	HUGO.Genes.groups	0.968566	0.991078	0.0463228	-0.336151	-0.53743	2	EBF2,EBF4	HUGO.Genes.groups
GOBP_CANONICAL_WNT_SIGNALING_PATHWAY	0.00076292	0.0363627	0.477271	0.279731	1.57599	239	TBL1XR1,TLE6,TMEM9,CTDNEP1,EGFR,AMER1,PTK7,GLI1,WNT5B,DKK1,NR4A2,EGR1,BCL9L,CHD8,SMAD3,CAPRIN2,WNT10A,TGFB1,STK4,DAB2IP,FRAT2,STK11,RPS12,FZD2,NRARP,PRICKLE1,G3BP1,RECK,LRRK1,MIR29B1,SOX9,IGFBP4,DVL1,PYGO2,MIR26A1,WNT7B,WNT9A,MCC,SOX13,TLE1,TLE3,RAB5A,LZTS2,SOSTDC1,DACT1,DKK3,CCDC88C,EMD,PRDM15,RARG,MDK,EXT1,TCF7,LIMD1,TMEM88,NOG,KREMEN1,TRPM4,FGFR2,LGR4,PPP1CA,FGF2,WNT11,APOE,NID1,DIXDC1,SOX2,WN…	c5_GO.Biological.Process	0.0211495	0.270035	0.352488	0.208421	1.37313	248	RBX1,DVL2,TMEM88,RUVBL2,PTK7,GSK3A,CBY1,PYGO2,DDX3X,ADNP,TLE5,CTDNEP1,LGR4,TMEM9,TGFB1,CAV1,CSNK1A1,NOTCH1,USP47,SDHAF2,WNT7B,FZD1,WNK1,CSNK1E,LZTS2,BMAL1,UBR5,CDH3,MKS1,WNT5B,JRK,LRRK1,RARG,FOXD1,WNT10A,MDK,WNT2B,CCAR2,SOX2,LMBR1L,FZD2,RAB5A,FAM53B,TMEM198,DAB2IP,CHD8,ZNF703,FZD4,STK11,WNT11,USP34,MIR29B1,WNT4,LRP5,USP8,MAPK14,GSKIP,FUZ,CSNK1G2,APC2,FZD9,FGF2,HHEX,DACT3,G3BP1,WWTR1,NKX2-5,LRP4,S…	c5_GO.Biological.Process
WP_ALZHEIMER_39_S_DISEASE_AND_MIRNA_EFFECTS	0.000771837	0.0679217	0.477271	0.289372	1.62158	213	BAD,PLCB3,ADRM1,CAPN2,PIK3CD,TNFRSF1A,ATG14,KLC4,WNT5B,DKK1,MAPK10,CAPN1,GRIN2D,WNT10A,CACNA1D,FRAT2,MIR101-1,PSMB7,FZD2,ULK1,MIR29A,MIR29B1,MAPK8,DVL1,NRAS,RELA,IKBKB,GAPDH,WNT7B,KRAS,MAPK9,GRIN1,TUBA1B,PPP3CA,ITPR3,IRS1,RB1CC1,CSF1,APH1B,PSMB2,IL1B,PSMD4,CALM3,CASP8,ATP2A3,PSMD13,AKT2,ATF4,TUBB6,PSMC2,MAPK3,PSMD9,PIK3R3,ITPR2,PSMA5,WNT11,APOE,PSMC6,PSMA6,PLCB2,CSNK1E,PPIF,VDAC2,RAF1,PSMA4,IL1A,…	c2_curated.Canonical.Pathways	3.23114e-05	0.00182439	0.557332	0.280374	1.78786	220	MAP2K7,DVL2,PSMC3,KLC4,PSMB6,BAD,PLCB3,CSNK2A3,TUBB6,NRBF2,NRAS,ATP2A1,LRP1,PSMD8,CSNK1A1,PSMD3,CACNA1D,KLC2,ATP2A2,WNT7B,FZD1,KLC1,BACE1,NOS2,CSNK1E,ATG101,CSNK2A2,PIK3R2,WNT5B,BECN1,XBP1,WNT10A,CAPN1,CASP3,WNT2B,KIF5B,PSMA1,TUBB4B,FZD2,APBB1,ITPR2,TUBA1C,AKT2,RELA,PSMA7,NCSTN,GAPDH,AMBRA1,WNT11,TUBA4A,MIR29A,MIR29B1,WNT4,LRP5,MAPK9,ATG2A,PSMD4,ATG2B,ULK1,ADAM10,RAF1,MCU,APC2,FZD9,BRAF,PSMB1,ADA…	c2_curated.Canonical.Pathways
NAD salvage pathway III; datasource: humancyc;	0.000784722	0.0880556	0.477271	-0.932575	-1.90585	4	NMNAT2,NMNAT1	PathwayCommons11	0.0628684	0.572801	0.252961	-0.714091	-1.48346	4	NMNAT1,NMNAT3,NMRK1,NMNAT2	PathwayCommons11
GOBP_OLEFINIC_COMPOUND_METABOLIC_PROCESS	0.000785197	0.037192	0.477271	0.375416	1.79194	85	RDH11,PLB1,ADM,H6PD,EGR1,CYP1B1,MGLL,CYP46A1,BMP6,STARD3,PTGES3,ALDH1A3,ELOVL1,DHRS3,GRIN1,BGLAP,PNPLA8,DKK3,GPX4,ABCD1,LHB,DGKQ,CACNA1H,PNPLA2,PTGDS,PTGES2,RDH10,ALOXE3,ABHD12,PLA2G4B,GSTP1,CREB1,MGST3,BCO2,DKKL1,PNPLA4,FADS2,HSD17B1,GPX1,CEL,CYP27C1	c5_GO.Biological.Process	0.0494166	0.395415	0.321776	0.260839	1.4007	83	PLA2G4C,ALOX12B,MGLL,ALOX12,CLCN2,CYP2S1,HSD17B1,PTGDS,BCO2,ELOVL1,ALDH1A3,ABHD6,RDH10,WNT4,PTGES3,PNPLA2,STAT5B,GSTM2,GSTP1,STARD3,ALOXE3,ABCD1,DGAT2,RDH11,PTGES2,GPX4	c5_GO.Biological.Process
Glycan.Sensing	0.000786875	0.00720277	0.477271	0.440867	1.85325	50	LYN,CARD9,PSMB7,PRKCD,UBC,NRAS,RELA,IKBKB,NFATC2,NFKBIA,PPP3CA,ICAM3,PSMB2,IL1B,CASP8,MUC1,NFATC1,SYK,PSMB10,RAF1,EP300,MAP3K14	NanoString_Genes	0.0157251	0.202679	0.352488	0.329806	1.54542	48	RELB,CARD9,NRAS,NFATC3,ICAM3,PSMB10,CARD11,NFKB2,FCER1G,UBC,CREBBP,RELA,PRKCD,RAF1,EP300,SKP1,PSMB5,MUC1,TAB1	NanoString_Genes
GOBP_REGULATION_OF_VIRAL_TRANSCRIPTION	0.000792349	0.0372071	0.477271	0.644684	2.05492	17	HEXIM1,TRIM8,UBP1,TRIM11,DHX9,ZFP36,TRIM13,IFITM3,MID2,RSF1,TARBP2	c5_GO.Biological.Process	0.0537849	0.398636	0.276501	0.459895	1.54574	15	TRIM8,ZFP36,HEXIM1,RSF1,TRIM14	c5_GO.Biological.Process
GOBP_CELL_FATE_SPECIFICATION	0.000795579	0.0372071	0.477271	0.383795	1.77742	72	CHD3,MTA3,CHD4,DKK1,HOXA11,LMO4,FKBP8,SOX9,TBX2,MTA1,MTA2,HOXC10,TBX6,ESRP1,GSX2,PTCH1,NRP1,NFIB,CDON,FGF2,HDAC2,WNT11,GATAD2A,TBX10,SOX2,NOTCH1,FOXA2,FOXA1,TBX1,WNT3A	c5_GO.Biological.Process	0.000153777	0.0165278	0.518848	0.381404	1.99064	73	MTA2,CHD3,CHD4,FKBP8,PAX2,ESRP1,MTA3,TBX6,NOTCH1,LHX3,SOX18,PTCH1,SOX2,DHH,TBX2,FOXA1,GATAD2A,HOXC10,TBX1,HOXA11,WNT11,SMO,DMRTA2,FOXI3,HOXD10,LMO4,HDAC2,APC2,TBX10,FGF2,NFIA	c5_GO.Biological.Process
KEGG_MEDICUS_REFERENCE_GF_RTK_RAS_PI3K_SIGNALING_PATHWAY	0.000797564	0.0685905	0.477271	0.424963	1.85839	56	EGFR,PIK3CD,EFNA1,IGF1R,MET,PDGFA,ERBB3,SOS2,FGF5,NRAS,KRAS,VEGFB,KITLG,NGFR,CSF1,FGF17,PDGFRA,AKT2,NTF4,FGFR2,NTRK1,PIK3R3,FGF2	c2_curated.Canonical.Pathways	0.26087	0.676725	0.11725	0.217625	1.13183	66	NRAS,PDGFC,VEGFB,PIK3R2,NTF3,FGFR4,EFNA1,EFNA4,FGF21,AKT2,NTF4,PGF,EPHA2,NGFR,FGF2,FGF19,NTRK1,FGF22,FGFR2,EFNA3,PDGFA,FGFR3	c2_curated.Canonical.Pathways
GOBP_GLAND_MORPHOGENESIS	0.000800152	0.0372071	0.477271	0.374814	1.79624	87	EDAR,EGFR,GLI1,BMP4,CAPN1,PDGFA,PML,CRIP1,TGFB1,VDR,TP63,CEBPB,NR3C1,SOX9,CFLAR,TBX2,STAT6,KDM5B,BAX,SOSTDC1,CSF1,RARG,MDK,NOG,FGFR2,PTCH1,NRP1,NFIB,LAMA5,NOTCH1,NTN4,TNC,MMP2,ESRP2,FOXA1,MED1	c5_GO.Biological.Process	0.234951	0.661171	0.123257	0.20669	1.13424	92	NR3C1,CEBPB,BAX,MMP2,STAT6,TGFB1,CAV1,NOTCH1,PTCH1,RARG,XBP1,MDK,CAPN1,TBX2,FOXA1,BMP4,MED1,CUL3,WNT4,LRP5,EPHA2,TGFBR2,SCRIB,KDM5B,BMP7,FRS2,FGFR2,PDGFA,FBXW7,VDR,NOG,TGFB3,CFLAR,PHB2	c5_GO.Biological.Process
Cell.Adhesion...Motility	0.000807207	0.00720277	0.477271	0.35764	1.73055	97	BAD,CAPN2,EGFR,PIK3CD,RAC3,ACTB,MAPK10,IGF1R,MET,PDGFA,ITGB6,SOS2,MAPK8,VEGFB,MAPK9,SHC1,JUN,CCND1,NECTIN2,PKP3,PVR,PDGFRA,AKT2,LAMB3,ITGA1,THBS1,PRKCG,MAPK3,PRKCA,CCND2,LAMC3,PIK3R3,LAMC2,LAMA5,PAK5,TNC,RAF1,PIK3R2,CD9,COL2A1,ITGB4,JUP,ITGB3,RHOA,SHC3	NanoString_Genes	0.259023	0.625973	0.122679	-0.197641	-1.11052	99	EGFR,NECTIN1,PIK3R3,BCL2,IGF1R,KRT5,ITGB1,CAPN2,SOS1,PIK3CA,VEGFD,FYN,LAMA3,CD9,ITGA1,FLNA,PRKCA,COL4A6,JUP,FLT1,ELK1,LAMC2,THBS1,JUN,PIK3CB,GRB2	NanoString_Genes
GOBP_ERYTHROCYTE_HOMEOSTASIS	0.00081153	0.0373574	0.477271	0.351712	1.76403	111	AXL,SLC1A5,LYN,MAEA,ID2,BMP4,HOXB6,BCL6,ZNF16,HOXA5,ISG15,CITED2,SH2B3,KMT2E,CFLAR,ZBTB7A,SMAP1,P4HTM,PRDX1,SPI1,ERCC2,NCKAP1L,MAPK11,RACGAP1,ETV2,ZFP36L1,DMTN,PKNOX1,CDIN1,SRF,PTBP3,HIPK2,HCLS1,CEBPG,ACVR1B,ZFP36,RCOR1,ACVR2A,HSPA9,ARID4A,PRMT1,TGFBR3,MED1,SLC25A5	c5_GO.Biological.Process	0.00397536	0.124328	0.407018	0.288498	1.667	114	SLC1A5,AXL,ZBTB7A,PRMT1,ACIN1,ISG15,INHBA,ZFP36,HCLS1,ARNT,HOXB6,LDB1,MAEA,RCOR1,HOXA5,CEBPG,MAPK11,CASP3,ZFPM1,ETV2,NCKAP1L,BRD1,JMJD6,BMP4,MED1,NCAPG2,PKNOX1,MAPK14,STAT5B,ERCC2,ADAR	c5_GO.Biological.Process
GOBP_CELLULAR_RESPONSE_TO_DECREASED_OXYGEN_LEVELS	0.000813182	0.0373574	0.477271	0.337104	1.72037	121	BAD,NOL3,NFE2L2,CDKN1B,EGR1,NOP53,DDAH1,TGFB1,BRIP1,CITED2,CFLAR,MYC,SLC9A1,MDM2,CPEB4,PLK3,NDRG1,AJUBA,ADO,ENO1,TP53,ZFP36L1,RPTOR,FOS,RWDD3,EPHA4,STUB1,ATF4,MIEF1,HIPK2,HILPDA,FGFR2,EGLN3,TIGAR,PRKCE,TMBIM6,MALAT1,EGLN2,CPEB2,NOTCH1,MLST8,MIR126	c5_GO.Biological.Process	0.466418	0.806007	0.0791317	0.171258	0.998	118	TMBIM6,SLC29A1,BAD,USP19,TGFB1,NOTCH1,STC2,MYC,RPTOR,PRKCE,EPHA4,SDHD,MIR34A,TP53,NONO,FOS,IRAK1,MLST8,NDNF,MIR140,BRIP1,TSC1,ADAM8,NFE2L2,BMP7,MIR126,HIF1A,HMOX1,FGFR2,HP1BP3,DDAH1,ATF4,MIEF1,NPEPPS,RWDD3,SLC9A1,AJUBA,MTOR,CFLAR,EGLN2,EPAS1,PHB2,STUB1,VHL	c5_GO.Biological.Process
EGF receptor signaling pathway; datasource: panther;	0.000815431	0.0880556	0.477271	0.352719	1.75095	102	EGFR,PIK3CD,PRKCH,MAPK10,CBLC,BTC,ERBB3,SOS2,DAB2IP,PRKCD,MAPK8,YWHAZ,NRAS,STAT6,SFN,SPRY4,MAPK9,SHC1,MAPK11,MAPK12,PRKCZ,PRKD2,AKT2,SPRY3,PRKCG,MAPK3,PRKCA,YWHAG,PRKCE,PPP2R5D,YWHAQ,MAPK13,RRAS,RRAS2,CBLB,PRKD3,RAF1,PRKCI	PathwayCommons11	0.35305	0.830576	0.0940503	0.189942	1.05639	100	MAP2K7,SPRY1,SHC1,NRAS,STAT6,PRKD2,YWHAZ,PRKCE,PPP2R5B,MAPK11,MAPK12,SPRY3,AKT2,RRAS,DAB2IP,NF1,PRKCD,RRAS2,MAPK9,MAPK14,STAT5A,STAT5B,RAF1,GAB2,PPP2CA,BRAF,STAT4,MAPK3,RAC1,PRKCZ,MAP2K4	PathwayCommons11
RUNX1 and FOXP3 control the development of regulatory T lymphocytes (Tregs); datasource: reactome;	0.000824948	0.0880556	0.477271	0.882436	1.91533	5	TNFRSF18,RUNX1,NFATC2,FOXP3	PathwayCommons11	0.640472	0.933044	0.0656814	-0.417418	-0.867149	4	FOXP3	PathwayCommons11
KEGG_T_CELL_RECEPTOR_SIGNALING_PATHWAY	0.000827254	0.0687435	0.477271	0.381481	1.80954	80	PAK6,CD247,PIK3CD,PTPN6,CBLC,CSF2,SOS2,NRAS,RELA,IKBKB,NFATC2,NFKBIA,KRAS,MAPK9,PPP3CA,MAPK11,MAPK12,JUN,FOS,AKT2,NFAT5,NFATC1,MAPK3,PIK3R3,PDPK1,MAPK13,NCK1,LAT,PAK5,CDC42,CBLB,RAF1,MAP3K14,IL5,PIK3R2,TEC,MAP2K7	c2_curated.Canonical.Pathways	0.012688	0.202526	0.38073	0.301359	1.60198	76	MAP2K7,NFAT5,PTPN6,LAT,NRAS,NFATC3,CD4,PIK3R2,CARD11,MAPK11,MAPK12,VAV1,PAK6,RASGRP1,AKT2,RELA,FOS,NFKBIE,CDC42,MAPK9,MAPK14,RAF1,DLG1,MALT1,MAPK3	c2_curated.Canonical.Pathways
WP_NANOPARTICLE_MEDIATED_ACTIVATION_OF_RECEPTOR_SIGNALING	0.000835677	0.0687435	0.477271	0.55348	2.01698	25	EGFR,PIK3CD,MAPK10,PTK2,MAPK8,NRAS,KRAS,MAPK9,MAPK11,MAPK12,PXN,ITGA1,MAPK13,RAF1	c2_curated.Canonical.Pathways	0.92986	0.978051	0.049094	-0.173552	-0.667144	24	EGFR,ITGB1,SOS1,ITGA1,PTK2,GRB2	c2_curated.Canonical.Pathways
GOBP_REGULATION_OF_EXTRACELLULAR_MATRIX_ORGANIZATION	0.000839886	0.0383531	0.477271	0.454949	1.91824	47	PHLDB1,TNFRSF1A,HAS2,SMAD3,EFEMP2,TGFB1,ZNF469,LAMC1,CLASP1,ABL1,MIR29B1,SOX9,CFLAR,EMILIN1,RUNX1	c5_GO.Biological.Process	0.0761523	0.445172	0.231127	0.289858	1.37317	47	LAMB2,LRP1,TGFB1,NOTCH1,ABL1,MELTF,FGFR4,LAMC1,PHLDB1,MIR9-1,MIR29B1,FSCN1,CHADL,EFEMP2,TNFRSF1A,CARMIL2,CLASP2,RB1,EMILIN1,CFLAR,DAG1,PRDM5,RUNX1,ADTRP,MIR98,PDPN	c5_GO.Biological.Process
GOBP_GLUCOCORTICOID_BIOSYNTHETIC_PROCESS	0.000848942	0.0385359	0.477271	0.786569	1.96926	8	H6PD,NR3C1,ATP1A1,DKK3,DGKQ,CACNA1H	c5_GO.Biological.Process	0.359756	0.747619	0.09855	0.379096	1.06947	9	NR3C1,WNT4	c5_GO.Biological.Process
WP_DNA_DAMAGE_RESPONSE_ONLY_ATM_DEPENDENT	0.00086046	0.0692762	0.477271	0.369039	1.78137	90	BAD,PIK3CD,WNT5B,CDKN1B,RAC3,MAPK10,BCL6,SMAD3,WNT10A,TGFB1,SOS2,ABL1,MAPK8,DVL1,NRAS,MYC,WNT7B,KRAS,MDM2,MAPK9,SOD2,RBL2,SHC1,BAX,BAK1,JUN,IRS1,TP53,CCND1	c2_curated.Canonical.Pathways	0.0877551	0.479376	0.216543	0.238204	1.32378	95	DVL2,CCND1,BAD,SHC1,NRAS,BAX,SOD2,TGFB1,MYC,WNT7B,ABL1,PIK3R2,WNT5B,WNT10A,RBL2,NFKB2,BCL2L11,WNT2B,TP53,AKT2,CDC42,WNT11,WNT4,MAPK9	c2_curated.Canonical.Pathways
GOBP_POSITIVE_REGULATION_OF_BONE_MINERALIZATION	0.000875063	0.0394866	0.477271	0.520782	1.96402	30	BMP4,TFAP2A,SMAD3,BMPR1B,ISG15,VDR,BMP6,ACVR2B,OSR2,SLC20A2,RXRA,BMPR2,ANO6	c5_GO.Biological.Process	0.0355029	0.337145	0.321776	0.379089	1.55759	29	ISG15,BMPR1B,TFAP2A,ACVR2B,BMP4,WNT4,FZD9,BMP7,ADGRV1,BMPR2,VDR,ATRAID,OSR2,SLC20A2	c5_GO.Biological.Process
MicroRNA.MIR17.family	0.000875388	0.118068	0.477271	-0.893071	-1.91233	5	MIR20A,MIR18A,MIR17	HUGO.Genes.groups	4.43479e-07	0.00023837	0.674963	-0.974544	-2.19286	5	MIR20A,MIR18A,MIR17,MIR93,MIR106B	HUGO.Genes.groups
REACTOME_CALCITONIN_LIKE_LIGAND_RECEPTORS	0.000887713	0.0696649	0.477271	0.990755	1.5526	2	ADM,ADM2	c2_curated.Canonical.Pathways	0.239044	0.650578	0.123842	0.523134	1.2174	5	ADM2,RAMP1	c2_curated.Canonical.Pathways
GOBP_POSITIVE_REGULATION_OF_LYMPHOCYTE_DIFFERENTIATION	0.000896072	0.0401967	0.477271	0.363522	1.76453	92	BAD,AXL,SMARCD2,AP3D1,ACTB,BCL6,SOX12,RARA,SHB,RHOH,RUNX1,CD27,ARID1B,NFKBIZ,ARID1A,SOX13,SPI1,NCKAP1L,FOXP3,IL4I1,PRKCZ,ZBTB7B,TNFSF4,KAT5,SMARCC1,ARID2,MDK,IL15RA,TOX,PCID2,SYK,SMARCC2,PPP2R3C	c5_GO.Biological.Process	0.351504	0.741119	0.095288	0.18863	1.06359	98	AXL,BAD,ZBTB7B,GAS6,TNFSF9,ACTB,AP3D1,XBP1,MDK,NCKAP1L,RASGRP1,SMARCE1,NFKBID,AMBRA1,SOCS1,XRCC6,STAT5B,SMARCD2,TGFBR2,ACTL6B,SMARCA2,MALT1,ADAM8,SHB,PRKCZ,KAT5,LGALS9,BTK,BTN2A2,PBRM1,PCID2,CBFB	c5_GO.Biological.Process
WP_NUCLEAR_RECEPTORS_META_PATHWAY	0.000906066	0.0696649	0.477271	0.286568	1.5848	200	CDC42EP3,SCNN1A,NRIP1,NCOA6,PTPA,EGFR,THBD,KEAP1,FTH1,NFE2L2,SP1,CDKN1B,IL11,EGR1,CPT1A,CYP1B1,TGFB1,ACOX1,AIP,VDR,PTGES3,AHRR,NR3C1,SEC14L1,ABCC5,MYC,SREBF1,JUNB,PLTP,SERTAD2,PRDX1,CPEB4,RGS2,APOA2,BAX,JUN,DNAJB1,STOM,RXRA,EPB41L4B,CCND1,NCOA3,AMIGO2,KLK15,PRDX6,IL1B,PRRG4,SLC19A2	c2_curated.Canonical.Pathways	0.109319	0.508676	0.179782	0.19147	1.2069	202	CCND1,NR3C1,SERPINB9,DNAJC7,SLC2A1,ACOX1,SPRY1,MAFG,FASN,ARNT,PPARA,IL11,BAX,CDC42EP3,TGFB1,JUND,MYC,GCLC,NR1H3,PTPA,SLC6A9,HSP90AA1,NFKB2,SLC39A9,HSP90AB1,AKAP13,CDC37,GGT1,SLC39A1,SLC39A5,SLC2A8,ME1,GCC1,SLC27A1,GSR,SLC27A5,PTGES3,EPHA2,TGFBR2,GSTM2,GSTM3,GSTM5,GSTP1,EP300,AIP,TNS4,FTL,POLK,FGF19,NFE2L2,ABCC4,NCOA1,AHRR,HMOX1,CES3,CES2,CPT2	c2_curated.Canonical.Pathways
GOBP_CELLULAR_RESPONSE_TO_MAGNESIUM_ION	0.000917365	0.0409112	0.477271	-0.896772	-1.9536	5	SMPD3,SLC41A1,RYR3	c5_GO.Biological.Process	0.30315	0.712014	0.10714	-0.514095	-1.15366	5	SMPD3,FBP1,KCNA1,ANK3	c5_GO.Biological.Process
KEGG_MEDICUS_PATHOGEN_HIV_VPR_TAT_TO_TNF_JNK_SIGNALING_PATHWAY	0.00092208	0.0696649	0.477271	0.874613	1.8812	5	MAPK10,MAPK8,MAPK9,JUN,FOS	c2_curated.Canonical.Pathways	0.760956	0.907535	0.0580984	0.325227	0.756848	5	FOS,MAPK9	c2_curated.Canonical.Pathways
FGF signaling pathway; datasource: panther;	0.000927191	0.0929528	0.477271	0.364892	1.75123	84	PIK3CD,PTPN6,PRKCH,MAPK10,FRS3,SOS2,FGF5,PRKCD,MAPK8,YWHAZ,NRAS,SFN,SPRY4,MAPK9,SHC1,MAPK11,MAPK12,PRKCZ,FGF17,AKT2,SPRY3,PRKCG,FGFR2,MAPK3,PRKCA,YWHAG,PRKCE,PPP2R5D,YWHAQ,MAPK13	PathwayCommons11	0.262664	0.773219	0.113313	0.20997	1.12285	85	MAP2K7,PTPN6,SPRY1,SHC1,NRAS,YWHAZ,PRKCE,PPP2R5B,MAPK11,MAPK12,FGFR4,SPRY3,PPP2R2D,AKT2,PRKCD,MAPK9,MAPK14,RAF1,PPP2CA,MAPK3,FRS2,RAC1,FGF22,FGFR2,PRKCZ,MAP2K4,MAP3K5,FGFR3	PathwayCommons11
Calcitonin-like ligand receptors; datasource: reactome;	0.000935333	0.0929528	0.477271	0.990755	1.55651	2	ADM,ADM2	PathwayCommons11	0.272908	0.785604	0.114751	0.523134	1.17865	5	ADM2,RAMP1	PathwayCommons11
GOBP_KETONE_BIOSYNTHETIC_PROCESS	0.000960388	0.0425809	0.477271	0.488425	1.91469	37	ADM,SIRT5,H6PD,EGR1,BMP6,STARD3,TPI1,BGLAP,DKK3,COQ10A,LHB,DGKQ,CACNA1H,COQ5,COQ3,CREB1,COQ8B,PDSS2,DKKL1,HSD17B1	c5_GO.Biological.Process	0.890656	0.966009	0.0507028	0.161204	0.722753	37	TPI1,CLCN2,HSD17B1	c5_GO.Biological.Process
GOBP_MYOBLAST_DIFFERENTIATION	0.000970286	0.0427711	0.477271	0.394907	1.83205	76	SMARCD2,PLEC,FLOT2,BMP4,CAPN3,BTG1,ACTB,BCL9L,JAG1,DDX5,TGFB1,PRICKLE1,SOX9,TBX2,NRAS,DDX17,ARID1B,ARID1A,MAPK12,SOSTDC1,ZFP36L1,KAT5,SMARCC1,ARID2,AKIRIN1,SRF,PLEKHM3,ANKRD2,SMARCC2,NOTCH1,TCF7L2,MBNL1,TRIP4,WNT3A,SMARCD1,IGFBP3,DTYMK,GPX1	c5_GO.Biological.Process	0.666667	0.887973	0.0647943	-0.162715	-0.882716	81	NRG1,ITGB1,PRICKLE1,ARID1B,IL18,JAG1,BCL9L,TRIP4,DDIT3,ARID1A,MBNL1,WNT3A,DPF3,PLEKHM3,RBPJ,SMARCC1,IGFBP3,LRRC8A,TBX3	c5_GO.Biological.Process
REACTOME_EFFECTS_OF_PIP2_HYDROLYSIS	0.00097338	0.0696649	0.477271	0.585996	1.97178	20	PRKCH,DGKE,MGLL,DGKG,PRKCD,DGKH,ITPR3,DGKQ,DGKZ,PRKCE,ITPR2,ABHD12	c2_curated.Canonical.Pathways	0.0216423	0.261619	0.352488	0.443362	1.67249	22	MGLL,DGKE,PRKCE,RASGRP2,TRPC3,ABHD6,DGKZ,RASGRP1,ITPR2,PRKCD	c2_curated.Canonical.Pathways
WP_REGULATORY_CIRCUITS_OF_THE_STAT3_SIGNALING_PATHWAY	0.000977186	0.0696649	0.45506	0.429448	1.85456	52	MAPKAP1,EGFR,MAPK10,AKT1S1,JAK1,MAPK8,MAPK9,IL11RA,RICTOR,MAPK11,MAPK12,CSF3R,IL10RA,RPTOR,PDGFRA,IL6R,MAPK3,F2R,IL15RA,MAPK13,IL6ST,IL20RB,MLST8,MAPK6,IL20RA,OSMR,PIAS3,DUSP2	c2_curated.Canonical.Pathways	0.719536	0.900389	0.0593488	0.17206	0.847438	54	RPTOR,MAPK11,MAPK12,JAK3,CREBBP,MAPK6,MAPK9,MAPK14,CTF1,MLST8,AKT1S1,CSF3R,MAPK3,IL6ST,IL20RB,MTOR	c2_curated.Canonical.Pathways
GOBP_REGULATION_OF_JNK_CASCADE	0.000990554	0.0434136	0.45506	0.35513	1.75543	102	LTBR,EDAR,MEN1,MAP4K2,EGFR,MECOM,IGF1R,CARD9,TAOK2,DAB2IP,AIDA,TRAF4,CD27,WNT7B,TNIK,NOD1,SEMA3A,DACT1,RB1CC1,MAP4K4,PHLPP1,MAP3K10,IL1B,HIPK2,RIPK1,KLHL31,MAP3K11,STK3,MAPKBP1,UNC5CL,GSTP1,MBIP,PRMT1,TGFBR3,IL1A,TAOK1,COPS5,HIPK3,MAP2K7,DNAJA1,DUSP10	c5_GO.Biological.Process	0.586498	0.855912	0.0736213	-0.165369	-0.940095	101	EGFR,PTK2B,MIR92A1,IGF1R,PER1,GADD45A,TNIK,PRKN,UNC5CL,WNT5A,CCN2,PHLPP1,PJA2,MAP4K4,CYLD,ULK4	c5_GO.Biological.Process
GOBP_RESPONSE_TO_WOUNDING	0.00100313	0.0435724	0.45506	0.247116	1.46453	373	AXL,SYT7,AHNAK,TSKU,THBD,LYN,PLEC,NFE2L2,PTK7,GLI1,ZFP36L2,PTPN6,ANXA2,ACTB,MYLK,IGF1R,NPR2,DGKE,SCARB1,KLK8,PDGFA,SMAD3,STK24,ERBB3,ITGB6,TGFB1,RTN4R,F11R,USF1,PTK2,WDR83,MCAM,CHMP7,DGKG,SH2B3,CLASP1,P2RX4,PRKCD,GNAS,MIR29A,MRTFA,RTN4RL2,CFLAR,LRIG2,CHMP1B,GRHL3,EMILIN1,METAP1,CSRP1,B4GALT1,DGKH,MAPK9,SFTA3,CD151,NFKBIZ,SOD2,PPP3CA,CTNNA1,STXBP1,FKBP10,BAX,AJUBA,EVPL,EPB41L4B,GIPR,CNN2,ZFP36L1,D…	c5_GO.Biological.Process	0.0112119	0.204066	0.38073	0.196822	1.37011	389	MAP2K7,AXL,BLOC1S3,PTK7,RTN4RL2,PTPN6,INHBA,FKBP10,ZFP36,ALOX12,PPARA,LAMB2,GAS6,NPR2,MERTK,ENTPD2,CTNNA1,BAX,SOD2,CHMP6,FOXC2,NAGLU,MMP2,MAG,TGFB1,F11R,USF1,DGKE,GP1BB,CAV1,MCAM,SRSF6,ITGB4,WDR83,ACTB,PRKCE,CHMP5,EPHA4,FERMT3,PRCP,CNN2,DST,XBP1,VAV1,MDK,DGKZ,WFDC1,CASP3,EXTL3,STK24,SOX2,MIR34A,GNAS,LMAN1,CHMP1B,FCER1G,CORO1B,SLC11A1,TYRO3,HGFAC,WAS,NF1,TYROBP,PRKCD,CD109,CX3CL1,TNFRSF12A,MIR29A,…	c5_GO.Biological.Process
PID_ERA_GENOMIC_PATHWAY	0.00100374	0.0696649	0.45506	0.434895	1.87251	51	CTSD,NRIP1,SET,LMO4,ANP32A,CEBPB,UBE2M,BRCA1,ATP5PF,MYC,MTA1,DDX17,DDX54,JUN,LCOR,CCND1,NCOA3,PRDM15,NCOA2	c2_curated.Canonical.Pathways	0.0538239	0.411345	0.321776	0.313869	1.52436	52	CCND1,CEBPB,BRCA1,NDUFV3,ABCA3,MYC,XBP1,SET,APBB1,MED1,MPG,DDX17,STAT5A,EP300,LMO4,NCOR2,LCOR,NCOA1,SAFB	c2_curated.Canonical.Pathways
GOBP_CD4_POSITIVE_ALPHA_BETA_T_CELL_ACTIVATION	0.00100607	0.0435724	0.45506	0.386762	1.80369	77	MEN1,SMAD7,STOML2,ARG2,BCL6,FUT7,RARA,JAK1,SHB,KMT2A,RUNX1,STAT6,JUNB,NFKBIZ,FOXP1,NCKAP1L,FOXP3,PRKCZ,ZBTB7B,TNFSF4,IL6R,NKG7	c5_GO.Biological.Process	0.744048	0.919784	0.0589694	0.163118	0.870768	81	RELB,SMAD7,ZBTB7B,TCIRG1,FUT7,LOXL3,STAT6,MEN1,CARD11,JAK3,ZFPM1,NCKAP1L,NFKBID,SOCS1,TGFBR2,MALT1,BRAF,STAT4,SHB,PRKCZ,LGALS9,CBFB,NLRP3,MTOR,NFKBIZ,KMT2A,ENTPD7,IL6R,RUNX1,NKX2-3,CD81	c5_GO.Biological.Process
KEGG_ALDOSTERONE_REGULATED_SODIUM_REABSORPTION	0.00101596	0.0696649	0.45506	0.526971	1.97506	28	SCNN1A,PIK3CD,ATP1B3,KRAS,SFN,ATP1A1,ATP1B1,IRS1,PRKCG,MAPK3,PRKCA,PIK3R3,PDPK1,ATP1A3	c2_curated.Canonical.Pathways	0.118126	0.523269	0.184706	-0.319977	-1.32412	30	PIK3R3,SCNN1A,ATP1B3,PIK3CA,NHERF2,SFN,PRKCA,PIK3CB,SGK1,IRS2,ATP1B1,PRKCG,KRAS,IRS1	c2_curated.Canonical.Pathways
KEGG_NEUROTROPHIN_SIGNALING_PATHWAY	0.0010162	0.0696649	0.45506	0.338085	1.69997	109	BAD,PIK3CD,MAPK10,SH2B2,SOS2,RPS6KA3,SH2B3,PRKCD,ABL1,MAPK8,YWHAZ,ZNF274,NRAS,RELA,IKBKB,NFKBIA,KRAS,MAPK9,RPS6KA2,SHC1,NGFR,BAX,MAPK11,MAPK12,JUN,IRS1,TP53,CALM3,AKT2,RPS6KA4,SH2B1,NTF4,ATF4,NTRK1,MAPK3,YWHAG,PIK3R3,SORT1,YWHAQ,PDPK1,MAPK13,CDC42,BDNF,RAF1,PIK3R2,CALML3,MAP2K7	c2_curated.Canonical.Pathways	0.122047	0.531306	0.17822	0.224606	1.27942	108	MAP2K7,BAD,SHC1,NRAS,BAX,YWHAZ,ABL1,PIK3R2,RPS6KA4,MAPK11,MAPK12,NTF3,ZNF274,TP53,RPS6KA2,CAMK2G,AKT2,NTF4,RELA,PRKCD,NFKBIE,CDC42,PTPN11,MAPK9,MAPK14,IRAK1,NGFR,RAF1,ARHGDIA,BRAF,NTRK1,SH2B2,MAPK3,FRS2,RAC1	c2_curated.Canonical.Pathways
GOBP_HOMOPHILIC_CELL_ADHESION_VIA_PLASMA_MEMBRANE_ADHESION_MOLECULES	0.0010162	0.0435724	0.45506	0.380738	1.80517	82	PLXNB2,PTK7,CLSTN1,CDH16,CDHR2,ESAM,FAT3,CELSR2,DSC2,PLXNB3,AMIGO2,NECTIN2,CDH15,L1CAM,PVR,IGSF9,PCDHGA12,PCDHGC3,PCDHGC5,PCDHGC4,PCDHGB7,PCDHGB6,PCDHGB5,PCDHGB3,PCDHGB2,PCDHGB1,PCDHGA11,PCDHGA10,PCDHGA9,PCDHGA7,PCDHGA6,PCDHGA5,PCDHGA4,PCDHGA3,PCDHGA2,PCDHGA1,PCDHGB4,PCDHGA8,CDH24,MPZL2	c5_GO.Biological.Process	0.421687	0.78182	0.0886261	-0.186708	-1.01288	81	NECTIN1,SDK1,SDK2,FAT2,ITGB1,CDHR2,ROBO3,PTPRG,PTPRM,FAT4,PCDH9,PIK3CB,DCHS1,CDHR3,NECTIN4,CDHR4,CDH13,PCDH12,IGSF11,CDH23,PCDHGA8,PCDHGB4,PCDHGA1,PCDHGA2,PCDHGA3,PCDHGA4,PCDHGA5,PCDHGA6,PCDHGA7,PCDHGA9,PCDHGA10,PCDHGA11,PCDHGB1,PCDHGB2,PCDHGB3,PCDHGB5,PCDHGB6,PCDHGB7,PCDHGC4,PCDHGC5,PCDHGC3,PCDHGA12	c5_GO.Biological.Process
GOBP_CYTOSKELETON_ORGANIZATION	0.00101808	0.0435724	0.45506	0.206736	1.34019	1110	DSTN,CEP295NL,CDC42EP3,PHLDB1,TLE6,PAK6,TLN2,CAPN2,MAPKAP1,PTPA,GABARAP,MYO18A,CHD3,SPTB,PLEC,RHOQ,MAEA,KIAA0753,FRMD3,CUL7,PTK7,FSCN2,TNNT2,MAST4,SORBS3,PDLIM2,FGD3,CCDC57,FGD2,CAPN3,CDKN1B,KRT18,KRT8,RAC3,ACTB,SPAST,TMSB10,SH2B2,EHD2,BCL6,MET,PDGFA,STAG2,HOOK3,EPS8,NF2,SMAD3,PKP1,TAOK2,CAMSAP1,STMN3,PRICKLE4,CAPZA1,NOS1AP,F11R,PTK2,TESK1,MKKS,EPB41L1,CHMP7,ESAM,RND2,TRIM36,CGN,TCAP,PACSIN3,MICA…	c5_GO.Biological.Process	0.00581898	0.15281	0.407018	0.16822	1.2961	1132	GABARAP,WEE1,DNAH2,PHPT1,CDC42BPG,FMNL3,MARK4,MISP,PALM,SIPA1,KPTN,CUL7,PTK7,PAFAH1B1,CHD3,FGD1,KNSTRN,SPRY1,CAPZA1,CLUAP1,MIR149,GOLGA2,SHC1,FHOD1,CEP131,FSCN2,CECR2,HCLS1,GSN,TUBB6,CORO6,KANK3,RNF4,TUBG1,NAV1,BRCA1,DYNC1LI2,TPPP,KPNB1,AGRN,ARL2,SAC3D1,SON,RBM14,RHOV,OBSCN,AMOTL2,TACC1,GBA2,AVIL,PACSIN2,CLN3,HAX1,NECTIN2,CDC42BPA,BICD1,WASF1,CDC42EP3,MAEA,CHMP6,CCNF,DNAAF5,LRP1,KAT2A,F11R,ELN,PL…	c5_GO.Biological.Process
Validated nuclear estrogen receptor alpha network; datasource: pid;	0.00101954	0.0965402	0.45506	0.427972	1.84243	52	CTSD,NRIP1,SET,LMO4,ANP32A,CEBPB,UBE2M,BRCA1,ATP5PF,MYC,MTA1,DDX17,DDX54,JUN,LCOR,CCND1,NCOA3,PRDM15,NCOA2	PathwayCommons11	0.0224963	0.572801	0.352488	0.32291	1.55789	53	CCND1,CEBPB,BRCA1,NDUFV3,ABCA3,MYC,XBP1,SET,APBB1,MED1,MPG,DDX17,STAT5A,EP300,LMO4,NCOR2,LCOR,NCOA1,SFI1,SAFB	PathwayCommons11
GOBP_CELL_PROJECTION_ORGANIZATION	0.00102275	0.0435724	0.45506	0.205053	1.33358	1196	QRICH2,TMEM231,CDC42EP3,CDKL1,PAK6,METRN,ADM,IFT122,NKX2-8,EHD1,EVX1,TMEM80,EPS8L2,TSKU,SEPTIN7,PLXNB2,LYN,SH3YL1,RHOQ,NFE2L2,KIAA0753,TMEM237,CUL7,PTK7,EFNA1,ABHD17B,MIR200C,FGD3,CCDC57,FGD2,SEMA4B,MIR196A1,DKK1,RAC3,ACTB,NR4A2,SPAST,APLP2,FBF1,MYLK,IGF1R,TULP1,NPR2,CUX1,NSMF,EHD2,ECE1,KLK8,ISLR2,PDGFA,SKIL,RAB1A,SEMA3B,EPS8,TAOK2,GDI2,STK24,CAMSAP1,LMO4,BMPR1B,NYAP1,HOXA2,CAPRIN2,STMN3,MOV10,CD…	c5_GO.Biological.Process	0.00406889	0.126734	0.407018	0.165248	1.28312	1227	DVL2,WEE1,DNAH2,PHPT1,PRMT1,FMNL3,BLOC1S3,MARK4,EHD1,CAPRIN1,PALM,MAPKAPK5,ATP9A,PTPN9,CUL7,PTK7,RTN4RL2,PAFAH1B1,WDR90,GSK3A,MIR200C,FGD1,METRN,FBF1,MOV10,STX3,NOTCH3,CLUAP1,CBY1,NTN3,TBC1D24,CEP131,CECR2,ADNP,ECE1,GSN,TPRN,BMPR1B,RETREG3,TCIRG1,CIBAR2,AGRN,UST,MIR196A1,PAX2,CPNE9,EPHA10,LAMB2,NPR2,ANO1,AVIL,PACSIN2,CLN3,PRDM12,RAB34,CTNNA1,NECTIN2,WASF1,C12orf57,CDC42EP3,ZNF296,MMP2,DNAAF5,FLRT…	c5_GO.Biological.Process
Chaperonins	0.00102628	0.12304	0.45506	-0.774473	-2.03726	8	CCT3,HSPE1,HSPD1,CCT5,CCT7,CCT2,CCT4,CCT6B	HUGO.Genes.groups	0.134653	0.693802	0.169571	0.496622	1.36629	8	HSPE1,HSPD1,CCT7,CCT3	HUGO.Genes.groups
KEGG_MEDICUS_REFERENCE_PURINE_SALVAGE_PATHWAY_ADENINE_TO_AMP	0.00103098	0.0696649	0.45506	0.801668	2.04608	8	APRT,NT5C2,NT5E,LACC1	c2_curated.Canonical.Pathways	0.0117807	0.193767	0.38073	0.627852	1.75517	9	NT5C2,LACC1,APRT,NT5C1A	c2_curated.Canonical.Pathways
TWIK related potassium channel (TREK); datasource: reactome;	0.00103843	0.0965402	0.45506	0.999089	1.3288	1	KCNK4	PathwayCommons11	0.356299	0.830576	0.0972151	0.688598	1.12852	2	KCNK4,KCNK2	PathwayCommons11
REACTOME_REGULATION_OF_PTEN_GENE_TRANSCRIPTION	0.00106623	0.0697978	0.45506	0.441412	1.91426	53	MECOM,CHD3,MTA3,CHD4,EGR1,PHC3,LAMTOR1,MAF1,MTA1,MTA2,ATN1,LAMTOR2,JUN,TP53,RPTOR,HDAC7,MAPK3,HDAC2,GATAD2A,SALL4,RCOR1,RHEB,MLST8	c2_curated.Canonical.Pathways	0.0400729	0.363902	0.321776	0.305734	1.5097	55	MTA2,CHD3,CHD4,ATN1,RCOR1,MTA3,HDAC7,RPTOR,LAMTOR2,CBX4,TP53,GATAD2A,MAF1,LAMTOR3,RRAGD,MLST8,LAMTOR4,SCMH1,HDAC2,MAPK3,PHC3	c2_curated.Canonical.Pathways
GOBP_CELLULAR_COMPONENT_MORPHOGENESIS	0.00106672	0.0451933	0.45506	0.231649	1.42479	544	PHLDB1,PAK6,METRN,NKX2-8,EVX1,TSKU,PLXNB2,PLEC,CUL7,PTK7,EFNA1,TNNT2,SEMA4B,CAPN3,KRT8,RAC3,ACTB,NR4A2,SPAST,APLP2,IGF1R,NPR2,CUX1,NSMF,ECE1,KLK8,ISLR2,SKIL,SEMA3B,ABCA2,TAOK2,LMO4,BMPR1B,NYAP1,SLC9A8,HOXA2,POLG2,CAPRIN2,MOV10,RTN4R,PTK2,SPAG9,RND2,DAB2IP,FOXB1,TCAP,STK11,PRICKLE1,CLASP1,MYO9A,CELSR2,NTNG2,TIAM2,SIPA1L1,ABL1,ULK1,CFLAR,DVL1,NEDD4,DLG4,CSRP1,WNT7B,NCKAP1,VPS54,TNIK,SLC9A6,NKX2-1,R…	c5_GO.Biological.Process	0.00394588	0.123914	0.407018	0.191328	1.38708	570	DVL2,WEE1,CAPRIN1,ATP9A,CUL7,PTK7,PAFAH1B1,METRN,MOV10,NOTCH3,GPC1,NTN3,TBC1D24,ADNP,ECE1,BMPR1B,TPPP,UST,PAX2,CPNE9,EPHA10,LAMB2,OBSCN,NPR2,ANO1,PACSIN2,NECTIN2,BAX,WASF1,C12orf57,FLRT1,MAG,KRT19,NOTCH1,CNP,NPTX1,LHX3,PTCH1,ITGB4,IST1,ACTB,WNT7B,BCL11A,PLXNB2,NYAP1,ADCY10,EPHA4,EIF4G2,ABL1,STAU2,POU4F3,PLXNB1,SPTBN4,HSP90AA1,FOXD1,KRT8,NTF3,MDK,DNM2,CELSR2,SIX4,HSP90AB1,AKAP13,MFSD14A,EFNB3,KIF5…	c5_GO.Biological.Process
KEGG_FOCAL_ADHESION	0.00106984	0.0697978	0.45506	0.315492	1.6648	145	BAD,PAK6,TLN2,CAPN2,EGFR,PIK3CD,RAC3,ACTB,MAPK10,MYLK,IGF1R,MET,PDGFA,ITGB6,PTK2,LAMC1,SOS2,CAV2,MAPK8,VEGFB,MAPK9,SHC1,JUN,PXN,MYL11,CCND1,ITGB5,BCAR1,ARHGAP35,PDGFRA,AKT2,LAMB3,ITGA1,THBS3,THBS1,PARVB,PARVG,PRKCG,MAPK3,PRKCA,CCND2,LAMC3,PPP1CA,PIK3R3,LAMC2,PDPK1,LAMA5,MYL5,PAK5,CDC42,TNC	c2_curated.Canonical.Pathways	0.340866	0.745929	0.0972151	0.178245	1.05122	143	CCND1,BAD,SHC1,LAMB2,MYL5,MYL12B,CAV1,PDGFC,ITGA10,ITGB4,ACTB,PIP5K1C,VEGFB,PIK3R2,PARVB,PARVG,VAV1,ARHGAP5,PAK6,VASP,AKT2,LAMC1,PGF,ITGA2B,CDC42,MAPK9,RAF1,CAV2,ITGA3,ITGB8,BRAF,DOCK1,PXN,MAPK3,MYL11,RAC1,BCAR1,THBS3,PDGFA,ITGB5,ITGA11,ITGA5,ACTN1,COMP	c2_curated.Canonical.Pathways
GOBP_NEGATIVE_REGULATION_OF_CELLULAR_RESPONSE_TO_GROWTH_FACTOR_STIMULUS	0.00108709	0.0456055	0.45506	0.360406	1.71604	86	MMRN2,FSTL3,SMAD7,MIR200C,DKK1,SKOR1,SKIL,MIR15A,MIR16-1,DAB2IP,PDCD6,ATP2B4,ABL1,MIR29B1,CFLAR,EMILIN1,MIR26A1,NEDD4,PTPN1,SPRY4,NGFR,SOSTDC1,UBE2D1,SPRY3,NOG,THBS1,LEMD3,HIPK2	c5_GO.Biological.Process	0.0173998	0.247719	0.352488	0.280481	1.5218	87	MIR200C,SPRY1,GPC1,MIR149,SMAD7,MIR195,NOTCH1,FZD1,MIR15A,MIR16-1,ABL1,UBE2D3,SPRY3,LEMD3,DAB2IP,FSTL3,MIR29B1,WNT4,MICOS10-NBL1,NGFR,FUZ,DAND5,MMRN2,EPN2,FGF2,HHEX,SMAD6,PDCD6,SKIL,NEDD4,NOG,MIR573,MIR26A1,EMILIN1,CFLAR,SPRY4	c5_GO.Biological.Process
GOBP_NEGATIVE_REGULATION_OF_FIBROBLAST_PROLIFERATION	0.00108841	0.0456055	0.45506	0.533373	2.00343	29	PARP10,FTH1,MED31,DAB2IP,KMT2A,MYC,TP53INP1,SOD2,BAX,LZTS2,TP53,CDC73,EMD,INCA1,PAWR,GSTP1,IFI30,NF1	c5_GO.Biological.Process	0.0143609	0.22908	0.38073	0.422212	1.71991	28	INCA1,BAX,SOD2,CAV1,MYC,B4GALT7,LZTS2,TP53,ING5,DAB2IP,NF1,GSTP1,MED25	c5_GO.Biological.Process
GOBP_RESPONSE_TO_INORGANIC_SUBSTANCE	0.001098	0.0457148	0.45506	0.249978	1.48449	366	AXL,SYT7,DPEP1,FBLN5,CAPN2,SLC38A2,EGFR,HAMP,PLEC,NFE2L2,FOSB,ERCC1,TNNT2,CARF,CAPN3,CDKN1B,KRT8,TFAP2A,CYP1B1,NT5E,ANXA11,D2HGDH,CSF2,STK24,CRIP1,BMP6,SLC25A23,LTA4H,PDCD6,P2RX4,PRKCD,ATP2B4,ABL1,KMT2A,MAPK8,CFLAR,KHK,STAT6,RELA,NEDD4,DLG4,NFATC2,VPS54,JUNB,MDM2,PRDX1,SYT5,MAPK9,SOD2,SYT17,PPP3CA,ITPR3,BAK1,SPHK1,BGLAP,JUN,NDRG1,TP53,SLC25A13,GIPR,ADD1,TNFSF4,DMTN,MT1E,FOS,ECT2,CALM3,DDI2,RUNX2,…	c5_GO.Biological.Process	0.544419	0.837593	0.0815265	-0.137897	-0.970311	370	KCNMB2,EGFR,RYR2,RAD51,BCL2,ITPKC,PTK2B,TXN,RUNX2,STAT1,HDAC6,SMPD3,PRKAA1,EZH2,ADSS2,SEC31A,MIR21,KCNMB4,OSER1,TNFAIP3,PRKN,PLSCR1,PPIF,HESX1,ABAT,MIR103A1,WNT5A,ADCY1,ATP7A,CDK1,HNRNPD,SLC1A1,PRKAA2,CAPN2,CASQ2,EIF2AK3,PIK3CA,MYB,CCNA2,SLC30A4,BLM,AQP3,PARP1,FYN,KCNJ10,PTGS2,BAK1,DHFR,CAMK2D,PARK7,CYP1B1,ITPKB,FOSL1,GUCA1A,STK39,ANKZF1,ABCB6,CLIC4,PAM,NLGN1,TLR9,BAP1,MT2A,CDKN1B,CCR7,KIT,CPS1,Z…	c5_GO.Biological.Process
WP_SMITH_MAGENIS_AND_POTOCKI_LUPSKI_SYNDROME_COPY_NUMBER_VARIATION	0.0010993	0.0705044	0.45506	0.33029	1.70152	124	MAEA,ARG2,BCL6,RMI1,GDI2,ETV5,MIGA2,ULK1,RELA,IFT25,MYC,SREBF1,MIR33B,FLCN,PLD6,MPRIP,TNFSF13,BAX,JUN,NR1H2,RB1CC1,TP53,RPTOR,IL1B,CFL2,FHOD1,RAI1,EFCAB2,RAB10,MYO16,CARM1,IFT80,RAB8A,TFEB,MLST8,WWTR1,ALKBH5,PARD6B,PRKCI,MAP3K14,COPS4,FOXA2,FOXA1,COPS5,CREB1,YAP1,RNF41,DENR,PER1,RHOA,TRAF3IP1,ATG101,GID4,ATPAF2,CLEC16A,NR1H3,IFT172,STAT3	c2_curated.Canonical.Pathways	0.201172	0.616257	0.135002	0.202402	1.17002	126	TNFSF13,CLUAP1,FHOD1,CLEC16A,GID4,ATPAF2,MIGA2,BAX,MAEA,MYC,RPTOR,COPS6,IFT81,BMAL1,ATG101,NR1H3,BCL2L11,TP53,APBB1,RAI1,CFL2,FOXA1,FNIP1,RNF41,RELA,FLCN,PLD6,USP8,CCDC65,ULK1,MLST8,CRY2	c2_curated.Canonical.Pathways
GOBP_EYE_PIGMENTATION	0.001103	0.0457148	0.45506	-0.921498	-1.81768	4	ATP6AP2,HPS4,SPNS2	c5_GO.Biological.Process	0.967347	0.989328	0.0481184	0.233302	0.570485	6	SPNS2,VHL,HPS4,GPR143	c5_GO.Biological.Process
GOBP_REGULATION_OF_APOPTOTIC_SIGNALING_PATHWAY	0.00113797	0.0469088	0.45506	0.266026	1.54166	305	BAD,LTBR,TRAF1,MAZ,NOL3,NFE2L2,BMP4,NR4A2,SYVN1,SKIL,RAD9A,HNRNPK,PML,CSF2,BMPR1B,TPT1,STK4,MIR15A,MIR16-1,DAB2IP,MEIS3,RPL26,FAF1,TP63,IVNS1ABP,BRCA1,PRKCD,MIR29B1,NACC2,CFLAR,PTTG1IP,PYCR1,RELA,MYC,MCL1,YBX3,RACK1,FLCN,PTPN1,MDM2,MAPK9,SOD2,TNFSF12,CTNNA1,TMC8,PLEKHF1,NGFR,SGMS1,MSX1,BAX,BAK1,RB1CC1,ENO1,TP53,TRAF7,BCAP31,SFPQ,IL1B,MIR26B,SERINC3,ADCY10,HTT,GCLC,MIR27B,NOG,MUC1,THBS1,DNM1L,INCA…	c5_GO.Biological.Process	0.0470163	0.387908	0.321776	0.192202	1.30847	303	MCL1,BCL2L12,TMBIM6,DEDD2,INHBA,BAD,RFFL,DDX3X,BMPR1B,RPS6KB1,INCA1,BRCA1,MIR195,CTSK,CTNNA1,BAX,SOD2,HTRA2,ELL3,CAV1,MARCHF7,USP47,ZNF385A,MYC,SFPQ,GCLC,FZD1,QARS1,MIR15A,MIR16-1,ADCY10,MADD,CSNK2A2,PSME3,BECN1,ARHGEF2,XBP1,BCL2L11,TNFSF12,CCAR2,TP53,ZMYND11,ING5,TMBIM1,GNAI2,MEIS3,MAZ,MIR26B,BMP4,TPT1,TXNDC12,DAB2IP,NF1,NONO,RELA,PRKCD,TRAF7,NACC2,CDKN2D,CX3CL1,NDUFA13,TNFRSF12A,FLCN,PTPMT1,NDU…	c5_GO.Biological.Process
GOBP_NEURON_APOPTOTIC_PROCESS	0.00114766	0.0470541	0.45506	0.28472	1.57565	206	AXL,DKK1,NR4A2,EGR1,NPR2,TFAP2A,AKT1S1,NSMF,SET,CLCF1,ERBB3,NLRP1,FOXB1,CLN3,TP63,CEBPB,UBE2M,SIGMAR1,ABL1,NR3C1,THRB,PYCR1,MCL1,GAPDH,CORO1A,VPS54,KRAS,CPEB4,SOD2,ATN1,STXBP1,NGFR,BAX,TP53,CCND1,TRAF7,RAD21,AGAP2,CASP8,MDK,ADCY10,AKT2,GCLC,ITGA1,MIR200A,NTF4,ATF4,HIPK2,PRKCG,NRP1,RIPK1,NTRK1,EGLN3,F2R,TMBIM6,MAP3K11,APOE,PPT1,MIR98,SLC25A27,EGLN2,IL6ST,MIR15B,PIGT,BDNF,PRKCI,DNAJC5,PCDHGC3,PCDHG…	c5_GO.Biological.Process	4.71031e-05	0.00853045	0.557332	0.283392	1.833	217	MAP2K7,MCL1,AXL,THAP11,CCND1,NR3C1,TMBIM6,MAP3K11,ADNP,CEBPB,MIR195,TFAP2A,NPR2,CLN3,BAX,ATN1,SOD2,HTRA2,MAG,GCLC,FZD1,BACE1,ADCY10,ATP13A2,ABL1,POU4F3,CITED1,NTF3,MDK,BCL2L11,SIX4,CASP3,TP53,SET,KDM2B,TYRO3,AKT2,NTF4,ARMCX5-GPRASP2,GPRASP3,NF1,NONO,TRAF7,NCSTN,GAPDH,AMBRA1,CX3CL1,PITX3,THRB,UCP2,FOXB1,MECP2,ADORA2A,NGFR,RETREG1,VPS54,AKT1S1,DNAJC5,NDNF,NRBP2,FZD9,UCN,CDC34,BRAF,NTRK1,ADAM8,NPPC,…	c5_GO.Biological.Process
Polypeptide.N.acetylgalactosaminyltransferases	0.0011511	0.124204	0.45506	-0.691221	-2.02166	11	GALNT3,GALNT16,GALNT18,GALNT14,GALNT6,GALNT12,GALNT2,GALNT4,GALNT8	HUGO.Genes.groups	0.460446	0.884917	0.0843144	0.342337	0.99838	10	GALNT18,GALNT16,GALNT6,GALNT4	HUGO.Genes.groups
Downstream signaling in na√Øve CD8+ T cells; datasource: pid;	0.0011616	0.104616	0.45506	0.474108	1.87843	36	TNFRSF18,CD247,EGR1,MAPK8,NRAS,NFATC2,KRAS,JUNB,MAPK9,JUN,FOS,CALM3,NFATC1,MAPK3,PRKCA,PRKCE,TNFRSF4	PathwayCommons11	0.613084	0.927952	0.0653834	0.20497	0.895896	34	NRAS,NFATC3,PTPN7,PRKCE,FOS,MAPK9,RAF1,BRAF,STAT4,MAPK3	PathwayCommons11
GOBP_CELLULAR_RESPONSE_TO_PEPTIDE_HORMONE_STIMULUS	0.0011725	0.0478154	0.45506	0.283508	1.5842	228	SCNN1A,CTSD,ZNF106,LYN,RHOQ,NFE2L2,SP1,NR4A2,IGF1R,SH2B2,CYP1B1,FUT7,TNS2,USF1,PTK2,BRIP1,MBD5,SOS2,JAK1,RAP1GDS1,PRKCD,SLC27A4,PKM,CAV2,TRIB3,CFLAR,SOCS2,STAT6,RELA,SLC9A1,SREBF1,PTPN1,ARID1B,MDM2,PPP3CA,GRB7,SHC1,GPT,PRKCZ,BGLAP,IRS1,PXN,NCOA5,ZNF592,PRKAR1A,ZBTB7B,ZFP36L1,IL1B,FOS,SMARCC1,BCAR1,CAPN10,AKT2,GCLC,NCOA2,RAB10,MAPK3,PRKCA,YWHAG,INPP5K,SYAP1,NAMPT,PIK3R3,ASS1,VWA2,PDPK1,CPEB2,NCK1,…	c5_GO.Biological.Process	0.61039	0.86213	0.0728939	-0.140744	-0.933376	235	PIK3R3,NR4A2,HDAC5,STAT1,SCNN1A,INSIG2,CDC6,IGF1R,NAMPT,PRKAA1,CSK,BAIAP2,VAMP2,YWHAG,APPL1,ARID1B,MIR103A1,SIK2,VWA2,NCL,NCOA2,ZDHHC7,SOS1,AHSG,SORBS1,PTPN1,PIK3CA,CCNA2,NKX6-1,PARP1,SORL1,SELENOS,GKAP1,PRKCQ,CYP1B1,GPR173,PRKCA,C2CD5,GPR21,PRKD1,EIF4EBP2,SMARCC1,ATP2B1	c5_GO.Biological.Process
GOBP_LUNG_MORPHOGENESIS	0.00118012	0.0478703	0.45506	0.467005	1.89005	41	BMP4,HOXA5,SOX9,TBX2,GRHL2,WNT7B,KRAS,NKX2-1,PLOD3,SEC24B,EXT1,SRF,NOG,HIPK2,FGFR2,MAPK3,NFIB,RDH10,CDC42,TNC,ESRP2,FOXA1,YAP1	c5_GO.Biological.Process	0.00120584	0.0643479	0.45506	0.419479	1.93032	41	SPRY1,HOXA5,SRSF6,WNT7B,LIF,STK40,WNT2B,GRHL2,TBX2,RDH10,FOXA1,BMP4,CELSR1,CDC42,TGFBR2,SEC24B,MAPK3,FGFR2,NOG,MAP2K2,DAG1,CTSZ	c5_GO.Biological.Process
PID_HNF3A_PATHWAY	0.00118482	0.0729582	0.45506	0.530582	2.01917	29	NRIP1,SP1,CDKN1B,CEBPB,BRCA1,ATP5PF,JUN,NCOA3,FOS,PRDM15,POU2F1,NR2F2,NFIB,EP300,FOXA2,FOXA1	c2_curated.Canonical.Pathways	0.181818	0.602293	0.143759	0.304302	1.24023	28	CEBPB,BRCA1,NDUFV3,XBP1,CREBBP,FOXA1,FOS,NFIC,EP300,NFIA	c2_curated.Canonical.Pathways
GOBP_NEGATIVE_REGULATION_OF_MEIOTIC_CELL_CYCLE_PHASE_TRANSITION	0.00119402	0.0481776	0.45506	0.913788	1.79532	4	CHFR,TTK,PKMYT1	c5_GO.Biological.Process	0.0278854	0.297302	0.352488	0.755503	1.57619	4	OVOL1,CHFR,PKMYT1	c5_GO.Biological.Process
WP_ALZHEIMER_39_S_DISEASE	0.00119786	0.0729582	0.45506	0.281097	1.57301	209	BAD,PLCB3,ADRM1,CAPN2,PIK3CD,TNFRSF1A,ATG14,KLC4,WNT5B,DKK1,MAPK10,CAPN1,GRIN2D,WNT10A,CACNA1D,FRAT2,PSMB7,FZD2,ULK1,MAPK8,DVL1,NRAS,RELA,IKBKB,GAPDH,WNT7B,KRAS,MAPK9,GRIN1,TUBA1B,PPP3CA,ITPR3,IRS1,RB1CC1,CSF1,APH1B,PSMB2,IL1B,PSMD4,CALM3,CASP8,ATP2A3,PSMD13,AKT2,ATF4,TUBB6,PSMC2,MAPK3,PSMD9,PIK3R3,ITPR2,PSMA5,WNT11,APOE,PSMC6,PSMA6,PLCB2,CSNK1E,PPIF,VDAC2,RAF1,PSMA4,IL1A,SLC25A5,PIK3R2,CALML3,PS…	c2_curated.Canonical.Pathways	8.04745e-05	0.00422826	0.538434	0.280247	1.78627	215	MAP2K7,DVL2,PSMC3,KLC4,PSMB6,BAD,PLCB3,CSNK2A3,TUBB6,NRBF2,NRAS,ATP2A1,LRP1,PSMD8,CSNK1A1,PSMD3,CACNA1D,KLC2,ATP2A2,WNT7B,FZD1,KLC1,BACE1,NOS2,CSNK1E,ATG101,CSNK2A2,PIK3R2,WNT5B,BECN1,XBP1,WNT10A,CAPN1,CASP3,WNT2B,KIF5B,PSMA1,TUBB4B,FZD2,APBB1,ITPR2,TUBA1C,AKT2,RELA,PSMA7,NCSTN,GAPDH,AMBRA1,WNT11,TUBA4A,WNT4,LRP5,MAPK9,ATG2A,PSMD4,ATG2B,ULK1,ADAM10,RAF1,MCU,APC2,FZD9,BRAF,PSMB1,ADAM17,MAPK3,CASP9…	c2_curated.Canonical.Pathways
PID_IGF1_PATHWAY	0.00120196	0.0729582	0.45506	0.533068	1.96418	26	BAD,IGF1R,PTK2,PRKCD,YWHAZ,RACK1,PTPN1,SHC1,PRKCZ,IRS1,PXN,BCAR1	c2_curated.Canonical.Pathways	0.362035	0.755422	0.0959207	0.264652	1.06936	27	BAD,SHC1,RPS6KB1,YWHAZ,PRKCD,PTPN11,RAF1,PXN,PRKCZ,BCAR1,CRK,RACK1,PDPK1	c2_curated.Canonical.Pathways
GOBP_PATTERN_SPECIFICATION_PROCESS	0.00120958	0.0485488	0.45506	0.260524	1.5263	339	BCOR,IFT122,GLI1,BMP4,HOXB6,HOXB7,HOXB8,HOXB9,DKK1,TASOR,HOXA9,HOXA10,HOXA11,HOXA3,HOXA7,SMAD3,HOXA4,HOXA5,HOXA6,HOXC13,BMPR1B,FKBP8,HOXA2,NEK8,MKKS,CITED2,CYP26B1,FOXB1,BHLHE41,TCAP,AIDA,ACVR2B,MEIS3,CRAMP1,IFT140,SATB2,NRARP,PRICKLE1,TP63,CELSR2,KMT2A,GRHL3,PCSK6,DVL1,TBX2,IFT25,WNT7B,PLD6,ANKS6,HOXB3,HOXB5,NKX2-1,FOXJ1,DNAAF3,HOXC5,HOXC6,HOXC9,HOXC4,HOXC8,HOXC10,TBX6,MSX1,ZEB1,SOSTDC1,IRX4,TP5…	c5_GO.Biological.Process	2.91179e-05	0.00701991	0.57561	0.251296	1.73126	358	DVL2,TDRKH,DPCD,SPRY1,CLUAP1,BMPR1B,FKBP8,HOXB6,HOXB7,HOXB8,HOXB9,PAX2,NEK8,LDB1,FOXC2,PCSK6,HOXA3,HOXA5,HOXA6,HOXA4,HOXA7,KAT2A,ACVR2B,HOXC13,TBX6,NOTCH1,ODAD4,LHX3,SOX18,PTCH1,WNT7B,HOXD3,HOXD4,POGLUT1,HOXC11,MKS1,RARG,FOXD1,CELSR2,TRA2B,WNT2B,MKKS,TP53,TBX2,PBX3,OVOL2,HOXC5,HOXC6,HOXC9,MEIS3,KDM2B,FOXA1,BMP4,TASOR,WDR77,PIERCE1,NTF4,HOXC4,HOXC8,HOXC10,BMP1,TBX1,ADGRG1,ZEB1,HOXA9,HOXA10,HOXA11,…	c5_GO.Biological.Process
REACTOME_EXTRA_NUCLEAR_ESTROGEN_SIGNALING	0.0012474	0.0729582	0.45506	0.404354	1.79685	59	GNG8,EGFR,CDKN1B,IGF1R,BTC,PTK2,CAV2,NRAS,KRAS,SHC1,PRKCZ,SPHK1,GNB1,CCND1,FOS,AKT2,SRF,GNB5,MAPK3,GNG7,PIK3R3,PDPK1,GNB2,MMP2,GNG3,PRMT1,ZDHHC7,PIK3R2,HSP90AA1,CREB1,XPO1,GNB3,GNAI2	c2_curated.Canonical.Pathways	0.137795	0.551395	0.166934	0.247695	1.25569	61	CCND1,PRMT1,GNG7,GNG12,SHC1,NRAS,MMP2,CAV1,PIK3R2,HSP90AA1,GNB2,GNG3,GNAI2,AKT2,XPO1,FOS	c2_curated.Canonical.Pathways
WP_WNT_SIGNALING_PATHWAY_AND_PLURIPOTENCY	0.00125225	0.0729582	0.45506	0.372386	1.76639	80	PTPA,CTBP1,FBXW2,PRKCH,WNT5B,MAPK10,WNT10A,FZD2,PRKCD,DVL1,MYC,WNT7B,MAPK9,PRKCZ,ZBTB33,JUN,RACGAP1,TP53,CCND1,PPM1J,TCF7,PRKCG,PRKCA,CCND2,PRKCE,WNT11,SOX2,NFYA,CSNK1E,TCF7L2,PRKCI,EP300	c2_curated.Canonical.Pathways	0.00816258	0.159995	0.38073	0.303439	1.66538	87	DVL2,CCND1,FOXD3,PAFAH1B1,CTBP1,MYC,WNT7B,FZD1,PRKCE,CSNK1E,WNT5B,PTPA,CTBP2,WNT10A,WNT2B,SOX2,TP53,FZD2,CREBBP,PRKCD,FZD4,WNT11,WNT4,LRP5,MAPK9,EP300,PPM1J,FZD9,PPP2CA,PRKCZ,MAP2K4,FZD3	c2_curated.Canonical.Pathways
REACTOME_TNFS_BIND_THEIR_PHYSIOLOGICAL_RECEPTORS	0.00125325	0.0729582	0.45506	0.637425	1.96285	15	TNFRSF18,EDAR,TNFRSF1A,TNFRSF25,CD27,TNFSF13,TNFSF4,TNFRSF6B,TNFRSF4,TNFSF8	c2_curated.Canonical.Pathways	0.179842	0.602072	0.144631	0.433373	1.29917	11	TNFSF13,TNFSF9,TNFRSF25,TNFRSF1A,CD27	c2_curated.Canonical.Pathways
Long.non.coding.RNAs..published.	0.00128757	0.125823	0.45506	0.301842	1.60275	167	HOTAIRM1,HOXA-AS3,HOXA-AS2,LINC00963,PAUPAR,IRAIN,LINC00857,HAS2-AS1,LINC00628,LINC00673,LINC00511,LINC00941,APTR,THORLNC,DLEU1,DLEU2,NKILA,CAMTA1-DT,PTENP1-AS,SATB2-AS1,LOXL1-AS1,PTCSC2,LUNAR1,SBF2-AS1,ROCR,CAHM,CASC11,B4GALT1-AS1,PCAT6,FOXD2-AS1,VPS9D1-AS1,NKX2-1-AS1,HOXC-AS1,LINC01089,FLICR,ZEB1-AS1,FBXL19-AS1,HOTAIR,LINC00887,AGAP2-AS1,LINC01138,TBILA,KCNQ1OT1,CCND2-AS1,SENCR,NCRUPAR	HUGO.Genes.groups	0.351039	0.83304	0.107972	-0.166311	-1.0502	171	CASC8,CASC11,CASC21,PRNCR1,CCAT2,PCAT1,LINC00887,FLICR,MALINC1,NEAT1,CAHM,HOTTIP,NRIR,LNCOC1,LINC00511,LINC00673,GASAL1,RB1-DT,HAR1B,HAR1A,PANCR,LINC00472,PACERR,ARLNC1	HUGO.Genes.groups
GOBP_ODONTOGENESIS	0.00132988	0.0528761	0.45506	0.375084	1.78342	83	BCOR,EDAR,ADM,BMP4,TFAP2A,NF2,PAX9,ITGB6,WNT10A,TUFT1,ACVR2B,TP63,JAG2,OSR2,CTNNA1,NGFR,MSX1,BAX,SNX10,SOSTDC1,CSF1,CSF3R,RUNX2,PDGFRA,FGFR2,HDAC2,LAMA5,ACVR2A,BSG,ZNF22,TNC,SLC4A2,TBX1,FOXC1,CNNM4,ROGDI,FST	c5_GO.Biological.Process	0.100386	0.499053	0.195789	0.232526	1.28438	94	INHBA,JAG2,TCIRG1,TFAP2A,PPARA,CTNNA1,BAX,ANKRD11,ACVR2B,BSG,WNT10A,BCL2L11,TUFT1,BMP4,CCDC154,TBX1,FAM20A,SMO,FOXC1,FOXI3,NGFR,CSF3R,HDAC2,STIM1,BMP7,LRP4,FGFR2	c5_GO.Biological.Process
GOBP_RHYTHMIC_PROCESS	0.00133126	0.0528761	0.45506	0.283052	1.58227	224	AXL,NRIP1,CIPC,SGPL1,ID2,KDM5A,SP1,MAPK10,EGR1,IGF1R,NPR2,NR1D1,CYP1B1,HAS2,PML,KDM2A,CSF2,BMPR1B,DDX5,BHLHE41,CAVIN3,KMT2A,MAPK8,PER2,SREBF1,RACK1,MTA1,KDM5B,MAPK9,NKX2-1,NGFR,ATF5,SRRD,PHLPP1,TP53,SFPQ,KAT5,CBX3,GPR176,RAI1,MDK,PDGFRA,KLF9,PTGDS,NCOA2,DNM1L,ATF4,KDM5C,PRKCG,NTRK1,LGR4,USP9X,PPP1CA,HEBP1,NAMPT,DHX9,DYRK1A,HDAC2,ASS1,CUL4A,HUWE1,HES7,PDE6B,NOTCH1,NFYA,MMP2,CSNK1E,EP300,CSNK1D,PER…	c5_GO.Biological.Process	0.0581818	0.406565	0.252961	0.198035	1.28701	224	AXL,RELB,PRMT5,USP7,INHBA,ADNP,GPR157,BMPR1B,NR2F6,PPARA,RBM4,GPR176,LGR4,PDE6B,NPR2,TOP1,NAGLU,MMP2,NOTCH1,TEF,SFPQ,IMPDH2,A2M,NOS2,CSNK1E,BMAL1,NR1H3,PTGDS,AGRP,NFKB2,MDK,CASP3,KDM2A,AMH,CCAR2,DBP,TP53,RAI1,CREBBP,TYRO3,ZFHX3,NONO,USP9X,ADORA1,FZD4,OPN4,MAPK9,STAT5B,SLC26A6,ADORA2A,NGFR,OGT,HTR7,EP300,CRY2,MYBBP1A,HDAC2,KDM5B,TOP2A,NCOR2,NTRK1,NPPC,NCOA1,HES7	c5_GO.Biological.Process
WP_HAIR_FOLLICLE_DEVELOPMENT_ORGANOGENESIS_PART_2_OF_3	0.00133834	0.0757024	0.45506	0.542565	2.02276	27	EDAR,GLI1,BMP4,PDGFA,TP63,MYC,CCND1,RUNX2,PDGFRA,FGFR2,PTCH1,CCND2,LAMA5	c2_curated.Canonical.Pathways	0.105675	0.504759	0.191892	0.324192	1.3496	30	CCND1,INHBA,PTCH1,MYC,FZD1,BMP4,CDH1,SMO,LRP5,FOXI3	c2_curated.Canonical.Pathways
WP_ANDROGEN_RECEPTOR_SIGNALING_PATHWAY	0.0013404	0.0757024	0.45506	0.383441	1.81525	77	DSTN,BUB1B-PAK6,PAK6,EGFR,SP1,RAD9A,SMAD3,TGFB1I1,PTK2,ETV5,TGIF1,BRCA1,RELA,RACK1,MDM2,PRDX1,RNF4,JUN,CCND1,NCOA3,ZNF318,KAT5,STUB1,LIMK2,RUNX2	c2_curated.Canonical.Pathways	0.226891	0.640188	0.131458	0.212429	1.14487	80	CCND1,NR2C2,TLE5,RNF4,PSMC3IP,BRCA1,CAV1,BAG1,PIK3R2,BUB1B-PAK6,PAK6,CREBBP,TGIF1,SMARCE1,RELA,CDC42,PIAS4,EP300,RAD9A,NCOR2,NCOA1,RAC1,KAT5,RNF6,PATZ1	c2_curated.Canonical.Pathways
GOBP_REGULATION_OF_RESPONSE_TO_EXTERNAL_STIMULUS	0.00135129	0.0532459	0.45506	0.218557	1.3738	710	CYP27B1,MMRN2,NT5C2,HEXIM1,TRAFD1,THBD,TNFRSF1A,CACTIN,HAMP,LYN,NFE2L2,MIR141,PTPN6,ANXA2,FLOT2,SEMA4B,CAPN3,ZDHHC5,INAVA,ARG2,TRIM65,IGF1R,NR1D1,NOP53,CHD8,CARD9,BCL6,NT5E,MET,PDGFA,SH2D1A,SEMA3B,SMAD3,FUT7,STK24,NLRP1,MGLL,TGFB1,RTN4R,USF1,PTK2,LACC1,MKKS,ISG15,VDR,MIR15A,MIR16-1,DAB2IP,BMP6,RPS6KA3,KLRD1,SH2B3,CLASP1,P2RX4,CEBPB,C5AR1,PRKCD,YTHDF2,SEC14L1,MAPK8,YWHAZ,UBE2K,LRIG2,EMILIN1,DVL1,M…	c5_GO.Biological.Process	0.0433333	0.372072	0.282013	0.16448	1.21657	697	IRF3,SERPINB9,MARK4,RNF26,MIR141,PTPN6,ISG15,KARS1,MKRN2,NT5C2,STX3,TBK1,MIR149,LACC1,TRIM41,ZFP36,DDX3X,SPATA2,CARD9,CEBPB,MGLL,ALOX12,MIR195,ARNT,PPARA,ZNF580,RBM14,LGR4,GAS6,SIGIRR,FUT7,NECTIN2,HEXIM1,BAX,NAGLU,AKIRIN1,TGFB1,USF1,CAV1,CSNK1A1,NOTCH1,PRKD2,YWHAZ,PDE2A,RABGEF1,ZDHHC1,SFPQ,MIR15A,MIR16-1,PRKCE,ZCCHC3,WNK1,HSPD1,A2M,BACE1,EPHA4,INAVA,MIR657,NR1H3,VEGFB,MIR6869,ASH1L,DUSP1,NMT1,SWA…	c5_GO.Biological.Process
GOBP_REGULATION_OF_CELLULAR_RESPONSE_TO_GROWTH_FACTOR_STIMULUS	0.00135568	0.0532459	0.45506	0.274482	1.55041	249	MMRN2,MEN1,HTRA4,FSTL3,SMAD7,WFIKKN1,MIR200C,BMP4,DKK1,BCL9L,SKOR1,SKIL,MIRLET7F1,SMAD3,FKBP8,TGFB1I1,TGFB1,CITED2,MIR15A,MIR16-1,DAB2IP,PMEPA1,STK11,PDCD6,ATP2B4,ABL1,MIR29B1,CAV2,CFLAR,ZBTB7A,PCSK6,EMILIN1,BRMS1,MIR26A1,NEDD4,FLCN,PTPN1,SPRY4,NKX2-1,NGFR,MSX1,ZEB1,SOSTDC1,DKK3,PRKD2,TP53,MIR10A,IL1B,STUB1,RUNX2,ARID4B,UBE2D1,SPRY3,PELO,MIR27B,NOG,THBS1,LEMD3,HIPK2,NRP1,KCNQ1OT1,FGF2,HDAC2,ENG,P…	c5_GO.Biological.Process	0.00471676	0.134981	0.407018	0.229144	1.51598	261	TGFBR3L,ZBTB7A,PRMT1,WFIKKN1,MIR200C,FAM89B,SPRY1,GPC1,MIR149,SMAD7,MIR195,MIR497,ARNT,FKBP8,PPARA,SNX25,WASF1,PCSK6,TGFB1,NOTCH1,PRKD2,FZD1,MIR15A,MIR16-1,MIR10B,PPP2R5B,IL17RD,MEN1,ABL1,FKBP1A,LTBP4,CITED1,FOXD1,UBE2D3,HSP90AB1,MIR1224,TP53,SPRY3,CREBBP,BMP4,LEMD3,JCAD,DAB2IP,FSTL3,ZNF703,ZEB1,CD109,FZD4,GLG1,STK11,MIR9-1,FLCN,MIR29B1,CIDEA,WNT4,MICOS10-NBL1,NGFR,FUZ,OGT,DAND5,EP300,MMRN2,EPN2,…	c5_GO.Biological.Process
GOBP_REGULATION_OF_SMALL_GTPASE_MEDIATED_SIGNAL_TRANSDUCTION	0.00136152	0.0532459	0.45506	0.285377	1.59077	220	MAPKAP1,GABARAP,PLEKHG6,EPS8L2,ARHGEF12,FGD3,FGD2,SH2B2,BCL6,MET,ARHGAP29,EPS8,PLEKHG3,ARHGAP32,STMN3,RTN4R,F11R,SOS2,DAB2IP,PSD2,MYO9A,TIAM2,SIPA1L1,ABL1,PLEKHG5,KRAS,FLCN,SPRY4,KITLG,RHOF,NUP62,CSF1,PLEKHG4,MAP4K4,RACGAP1,GPR35,SH3BP1,ECT2,ARHGAP26,ARHGAP35,ARHGAP4,RASIP1,CD2AP,SPATA13,SYDE2,SPRY3,GNA13,ARAP1,RAP1GAP2,CYTH2,IQSEC2,ADGRG1,NRP1,NTRK1,ALS2,FAM13A,ABCA1,F2R,CDON,SIPA1,ARF6,APOE,ARH…	c5_GO.Biological.Process	0.00573163	0.152397	0.407018	0.22719	1.4793	226	GABARAP,SIPA1,FGD1,SPRY1,OBSCN,PLEKHG1,ABCA1,ARHGAP30,F11R,NOTCH1,RHOF,RABGEF1,PLEKHG5,MADD,RASAL3,ABL1,ARHGEF2,ARHGAP8,SWAP70,VAV1,AKAP13,RALGAPA1,SPRY3,ARHGAP5,ARHGAP45,ARHGAP40,RALGAPB,MFN2,HEG1,RASGRP4,GMIP,LPAR2,RASGRP1,PLEKHG6,IQSEC1,ARAP1,ARFGAP1,KALRN,DAB2IP,NF1,ADGRG1,ARHGEF25,CUL3,EPS8L2,FLCN,PSD2,CDC42SE1,ARHGEF18,KANK2,OGT,MCF2L,RAF1,ARHGEF1,SH3BP1,ITGA3,PLEKHG4,KCTD13,ARFGEF2,ARHGDIA…	c5_GO.Biological.Process
Regulation of TP53 Activity through Acetylation; datasource: reactome;	0.00138432	0.120897	0.45506	0.566372	1.94996	21	CHD3,CHD4,PML,MTA2,BRPF3,TP53,AKT2,KAT6A,HDAC2,GATAD2A,MEAF6,EP300	PathwayCommons11	0.00726958	0.538184	0.407018	0.495629	1.85933	21	MTA2,CHD3,CHD4,BRPF1,TP53,ING5,BRD1,AKT2,GATAD2A,EP300,HDAC2,KAT6A	PathwayCommons11
KEGG_OLFACTORY_TRANSDUCTION	0.00138563	0.077106	0.45506	-0.467805	-1.889	33	CAMK2B,GUCA1A,OR52N1,OR51B2,OR51B4,OR52E8,OR52E6,OR52N5,OR52H1,OR51I1,OR51B5,PDE1C,CNGA4,CALM1	c2_curated.Canonical.Pathways	0.109312	0.508676	0.191892	-0.328722	-1.34213	29	CNGA4,CAMK2B,OR2A7,CAMK2D,PRKACB,GUCA1A,OR4F16,CALM1,GRK3,ARRB2,CALM3,PRKG1,PDE1C,OR2AE1,OR52N1,OR51B2,OR51B4,OR52E8,OR52E6,OR52N5,OR52H1,OR51I1,OR51B5	c2_curated.Canonical.Pathways
GOBP_CARDIAC_PACEMAKER_CELL_DIFFERENTIATION	0.00139902	0.054371	0.45506	-0.763997	-2.00115	8	BMPR1A,TBX3,BVES,SHOX2	c5_GO.Biological.Process	0.96063	0.988213	0.0467883	-0.20381	-0.549287	8	TBX3,BMPR1A,KCNJ8,MESP1,SHOX2,BVES,ISL1,NKX2-5	c5_GO.Biological.Process
Olfactory.receptors..family.51	0.00139933	0.125823	0.45506	-0.92672	-1.82667	4	OR51B2,OR51B4,OR51I1,OR51B5	HUGO.Genes.groups	0.266667	0.783033	0.11524	-0.579045	-1.20503	4	OR51B2,OR51B4,OR51I1,OR51B5	HUGO.Genes.groups
GOBP_CARTILAGE_DEVELOPMENT	0.00140455	0.054371	0.45506	0.319348	1.67124	144	FOSL2,TSKU,SMAD7,BMP4,WNT5B,BMP8B,NPR2,HMGA2,HOXA11,HOXA3,SMAD3,HOXA5,BMPR1B,TGFB1,MKKS,RARA,BMP6,SOX6,SATB2,SOX9,RUNX1,PBXIP1,NFATC2,WNT7B,WNT9A,OSR2,HOXB3,HOXC4,MSX1,ZEB1,ECM1,RFLNA,BMPR2,RUNX2,RARG,MDK,EXT1,SRF,NOG,THBS3,CHSY1,MAPK3,NFIB,FGF2,WNT11	c5_GO.Biological.Process	0.0149051	0.231181	0.38073	0.235419	1.44227	149	SMAD7,BMPR1B,CTSK,NPR2,COL27A1,HOXA3,HOXA5,KAT2A,TGFB1,WNT7B,HOXD3,RARB,WNT5B,RARG,PBXIP1,MDK,WNT2B,MKKS,BBS1,BBS2,BMP4,HOXC4,SOX6,BMP1,ZEB1,HOXA11,GLG1,WNT11,PTPN11,NKX3-2,SMAD1,MAPK14,DDRGK1,TGFBR2,SNORC,CHADL,ARID5A,MATN1,ITGB8,HOXB3,FGF2,NFIA,PTH1R,BMP7,NPPC,MAPK3,HIF1A,THBS3,FGFR3,COMP,BMPR2,MSX1,TSKU,NOG,SMAD5,LTBP3,RB1,WNT7A,SNAI1	c5_GO.Biological.Process
GOBP_ENDOLYSOSOMAL_TOLL_LIKE_RECEPTOR_SIGNALING_PATHWAY	0.00143186	0.0551484	0.45506	-0.456844	-1.85093	32	RSAD2,OAS1,TNFAIP3,HMGB1,HAVCR2,RTN4,SLC15A4,F2RL1,WDFY1,TRAF6,MAP3K7,EPG5,CAV1,GRAMD4,TNIP2	c5_GO.Biological.Process	0.34375	0.737595	0.0988903	-0.254135	-1.07769	31	UBQLN1,TNFAIP3,RSAD2,PELI1,PTPRS,WDFY1,EPG5,TLR9,MYD88,RTN4,HMGB1,IRAK4,F2RL1,SCARA3,SLC15A4	c5_GO.Biological.Process
GOBP_PROTEIN_DNA_COMPLEX_ORGANIZATION	0.00145591	0.0557927	0.45506	0.221415	1.38835	673	TBL1XR1,EEF1AKMT3,BCOR,MEN1,ANTKMT,UBR2,SMARCD2,ERCC6L2,BAZ2A,SMARCAD1,MECOM,H1-10,CHD3,PARP10,MTA3,GTF2A1,MED31,KDM5A,CHD4,METTL23,CAND1,PWWP2B,SMCHD1,CENPX,ACTB,RCCD1,BAZ1B,ZNF462,TASOR,HMGA2,SUPT16H,CHD8,BCL6,SET,BICRAL,KDM2A,H2AX,CFDP1,SETBP1,GRWD1,SPIN1,SETD1B,JADE2,USP3,VCPKMT,HDGFL2,ZMYND8,MACROH2A1,CHD9,SATB2,USP21,TP63,ATF7IP,KDM4B,BRCA1,KMT5B,NR3C1,ATXN7L3,SOX9,KMT2E,KMT2A,ZNF274,ZBTB7A…	c5_GO.Biological.Process	0.0466667	0.38624	0.271289	0.162925	1.20481	714	CENPT,KDM6B,NR3C1,ZBTB7A,PRMT1,RUVBL2,NFAT5,PKN1,ATXN7L3,PRMT5,H1-10,USP7,GSK3A,MTA2,CHD3,USP21,UHRF1,EMSY,ANTKMT,CFDP1,KMT2D,NAA60,CECR2,SIRT7,RNF4,CHD4,MED26,BRCA1,C17orf49,BRPF1,RBM14,KAT14,SART3,ZNF827,TOP1,TET3,MACROH2A1,RCOR1,INO80B,SPHK2,BANP,KAT2A,NTMT1,BAZ1B,BAZ2B,NSD1,MTA3,HDAC7,BRDT,KDM4B,L3MBTL1,RNF168,RSF1,HDGFL3,DPF1,DOT1L,MYC,ACTB,SFPQ,TSPYL5,PCGF1,H2AX,MED27,BICRAL,CDK2,UBR5,BUD23…	c5_GO.Biological.Process
REACTOME_SNRNP_ASSEMBLY	0.00146645	0.0804212	0.45506	-0.396829	-1.81345	51	NUP54,NUP155,TGS1,NUP210,SEH1L,DDX20,NUP35,CLNS1A,NUP43,NUP98,GEMIN5,POM121C,NCBP2,NUP58,SNRPF,GEMIN4,NUP133,SNRPB,NUP214,RAE1,GEMIN8,NUP42,SNRPD1,TPR,NDC1,RANBP2,SNRPD2,NUP37,NCBP1,NUP107	c2_curated.Canonical.Pathways	0.540594	0.838609	0.0745501	0.197295	0.951992	51	GEMIN7,SNUPN,PRMT5,GEMIN6,NUP50,NUP43,POM121,SNRPD3,WDR77	c2_curated.Canonical.Pathways
Other.Interleukin.Signaling	0.00150393	0.0124611	0.45506	0.343429	1.67519	100	PIK3CD,TNFRSF1A,LYN,LCN2,BCL6,CSF2,TGFB1,JAK1,SOCS2,STAT6,MYC,MCL1,JUNB,IL1R1,SOD2,SHC1,ZEB1,IRS1,CSF1,CSF3R,IL10RA,TP53,CCND1,IL1B,FOS,IL6R,MUC1,PIM1,PIK3R3,FGF2,SYK,LAMA5,HSP90B1,IL6ST,SOX2,IL20RB,IL1A,IL20RA,IL5,PIK3R2	NanoString_Genes	0.111324	0.451551	0.184706	0.232727	1.26896	92	MCL1,CCND1,SHC1,SOD2,STAT6,TGFB1,ITGB2,CD4,MYC,LIF,NOS2,PIK3R2,JAK3,CASP3,SOX2,TP53,ZEB1,FOS,PTPN11,SOCS1,STAT5B,IL34,CSF3R,SOCS2,FGF2,STAT4,HIF1A,MUC1,IL6ST,TNFRSF1A	NanoString_Genes
REACTOME_SIGNALING_BY_RECEPTOR_TYROSINE_KINASES	0.00150898	0.0804648	0.45506	0.24571	1.47527	405	AXL,CTSD,MAPKAP1,PTPN18,EGFR,LYN,ATP6V1E2,ID2,TNS3,FOSB,CHD4,PTPN6,ACTB,EGR1,IGF1R,SH2B2,MET,PDGFA,COL9A2,RALB,BTC,RRAD,ERBB3,FRS3,PTK2,LAMC1,RPS6KA3,FGF5,SH2B3,SHB,PRKCD,TRIB3,PCSK6,UBC,NRAS,STAT6,NEDD4,DLG4,MYC,NCKAP1,KRAS,VEGFB,GTF2F1,JUNB,GGA3,PTPN1,RPS6KA2,RICTOR,CTNNA1,KITLG,GRB7,ITPR3,SHC1,NCKAP1L,BAX,MAPK11,MAPK12,PRKCZ,SPHK1,IRS1,EPS15,PXN,ESRP1,APH1B,TIA1,PTBP1,POLR2B,PTK6,FGF17,FOS,BCA…	c2_curated.Canonical.Pathways	0.0146701	0.213419	0.38073	0.193334	1.34732	418	AXL,ADAP1,PTPN6,SPRY1,SHC1,ATP6V0C,CHD4,TCIRG1,NRAS,ESRP1,LAMB2,GTF2F1,TRIB3,COL27A1,CTNNA1,BAX,WASF1,GGA3,PCSK6,FLRT1,STAT6,CAV1,JUND,PDGFC,MXD4,MYC,ACTB,FOSB,PRKCE,POLR2E,VEGFB,PIK3R2,RRAD,ATP6V0D1,PRR5,MAPK11,MAPK12,HSP90AA1,VAV1,NTF3,MDK,DNM2,JAK3,MST1R,FGFR4,LYL1,CDC37,TIAL1,RPS6KA2,NCKAP1L,UBC,ITPR2,HGFAC,AKT2,LRIG1,RNF41,DLG4,NTF4,LAMC1,GRB7,PGF,PTBP1,FOS,PRKCD,NCSTN,CDC42,FGFRL1,ELMO2,EPN…	c2_curated.Canonical.Pathways
GOBP_REGULATION_OF_EPIDERMIS_DEVELOPMENT	0.00150993	0.0575738	0.45506	0.42697	1.84971	51	CYP27B1,KEAP1,BMP4,PRKCH,HOXA7,ETV4,VDR,MACROH2A1,TP63,GRHL2,SFN,ESRP1,NCOA3,ZFP36L1,NME2,MYCL,PTCH1,EXTL3,FGF2,ZFP36,NOTCH1,NAB2,MED1,FOXC1,SULT2B1,NAB1,OVOL2,NUMA1	c5_GO.Biological.Process	0.00874405	0.18535	0.38073	0.355146	1.69752	49	ETV4,ZFP36,MAFG,ESRP1,MACROH2A1,HOXA7,NOTCH1,SRSF6,PTCH1,EXTL3,GRHL2,OVOL2,BMP4,MED1,SULT2B1,CD109,FOXC1,ERRFI1,FGF2,CYP27B1,VDR,NME2,GRHL1,PTCH2,KEAP1,KDF1,ZFP36L1,MYCL	c5_GO.Biological.Process
KEGG_ACUTE_MYELOID_LEUKEMIA	0.001528	0.0804648	0.45506	0.450566	1.90841	46	BAD,PIK3CD,PML,RARA,SOS2,RUNX1,NRAS,RELA,IKBKB,MYC,KRAS,SPI1,CCND1,AKT2,TCF7,MAPK3,PIM1,PIK3R3,TCF7L2,RAF1,RPS6KB2,PIK3R2	c2_curated.Canonical.Pathways	0.190945	0.604768	0.1396	0.254113	1.21498	48	CCND1,RPS6KB2,BAD,RPS6KB1,NRAS,MYC,PIK3R2,EIF4EBP1,AKT2,RELA,STAT5A,STAT5B,RAF1,BRAF,MAPK3,CCNA1,CEBPA	c2_curated.Canonical.Pathways
WP_FOCAL_ADHESION_PI3K_AKT_MTOR_SIGNALING_PATHWAY	0.00153104	0.0804648	0.45506	0.276211	1.53165	203	BAD,GNG8,EGFR,PIK3CD,EFNA1,CDKN1B,IGF1R,AKT1S1,MET,PDGFA,ITGB6,PTK2,LAMC1,JAK1,STK11,ULK1,NRAS,IKBKB,SREBF1,KRAS,VEGFB,MDM2,KITLG,NGFR,GNB1,IRS1,CSF1,CSF3R,PHLPP1,ITGB5,RPTOR,FGF17,PDGFRA,EPOR,AKT2,LAMB3,IL6R,PELO,THBS3,THBS1,ATF4,RAB10,FGFR2,MAPK3,LAMC3,F2R,GNG7,PPP2R5D,FGF2,LAMC2,PDPK1,LPAR1,LAMA5,HSP90B1,RHEB,PPP2R3C,RAB8A,GNB2,TNC,MLST8,GNG3,RAF1,RPS6KB2,FOXA1,OSMR,PIK3R2,HSP90AA1,CREB1,STRAD…	c2_curated.Canonical.Pathways	0.00918718	0.174749	0.38073	0.228413	1.45418	219	GYS1,SLC2A1,GNG7,RPS6KB2,GYS2,GNG12,BAD,RPS6KB1,NRAS,LAMB2,ITGB2,EIF4B,PDGFC,ITGA10,ITGB4,ITGAE,CREB5,RPTOR,PPP2R5B,EPOR,NOS2,VEGFB,PIK3R2,HSP90AA1,GNB2,JAK3,HSP90AB1,FGFR4,CDC37,EFNA1,GNG3,EFNA4,PPP2R2D,FGF21,EIF4EBP1,LPAR2,FOXA1,AKT2,LAMC1,PGF,CHRM1,ITGA2B,STK11,STRADA,EPHA2,NGFR,ULK1,MLST8,RAF1,AKT1S1,PHLPP2,CSF3R,ITGA3,ITGB8,TSC1,FGF2,PPP2CA,FGF19,GNG10,MAPK3,CASP9,HIF1A,CRTC2,FGF22,FGFR2,EFN…	c2_curated.Canonical.Pathways
GOBP_REGULATION_OF_STRESS_ACTIVATED_PROTEIN_KINASE_SIGNALING_CASCADE	0.00156088	0.0591508	0.45506	0.312522	1.64789	148	LTBR,EDAR,MEN1,MAP4K2,EGFR,MECOM,LYN,BMP4,INAVA,IGF1R,CARD9,TAOK2,DAB2IP,AIDA,NBR1,TRAF4,MYC,CD27,WNT7B,TNIK,PRDX1,NOD1,SPI1,SEMA3A,SPHK1,DACT1,RB1CC1,MAP4K4,PHLPP1,MAP3K10,SEMA4C,IL1B,SASH1,HIPK2,RNF13,RIPK1,MAPK3,KLHL31,MAP3K11,STK3,MAPKBP1,UNC5CL,MIR181A2,KLHDC10,GSTP1,MBIP,PRMT1,TGFBR3,IL1A,TAOK1,COPS5,HIPK3,MAP2K7,DNAJA1,DUSP10,EIF2AK2,QARS1,PTPN22,TGFB2,PER1,DLG1,TRAF2	c5_GO.Biological.Process	0.811441	0.937423	0.0579755	-0.139397	-0.847462	146	EGFR,EIF2AK2,PTK2B,MIR92A1,MIR20A,IGF1R,PER1,GADD45A,MIR181B1,TNIK,PRKN,UNC5CL,WNT5A,CCN2,PHLPP1,PJA2,MAP4K4,CYLD,ULK4	c5_GO.Biological.Process
GOBP_SKIN_DEVELOPMENT	0.00156681	0.0591508	0.45506	0.2905	1.59113	193	CYP27B1,EDAR,FOSL2,EGFR,LSR,PLEC,PRKCH,DKK1,MET,JAG1,PDGFA,HOXA7,HOXC13,ITGB6,ETV4,WNT10A,VDR,STK4,CYP26B1,MACROH2A1,PTGES3,FOXE1,TP63,SLC27A4,ELOVL1,SOX9,ASPRV1,KRT7,KRT86,CFLAR,GRHL3,RELA,GRHL2,SHARPIN,SFN,NFKBIZ,PPP3CA,NGFR,ARRDC3,ERCC2,SOSTDC1,EVPL,GORAB,NCOA3,ZFP36L1,NME2,KRT17,EXT1,FOXN1,SRF,ASAH1,FGFR2,EXTL3,LGR4,ACVR1B,CYSRT1,HDAC2,ZFP36,IRF6,LAMA5,ALOXE3,NOTCH1,IL1A,MED1,KRT80,TXNIP,FUZ,…	c5_GO.Biological.Process	0.00378539	0.11986	0.431708	0.24193	1.55756	206	ALOX12B,ETV4,OVOL1,INHBA,KAZN,ZFP36,ALOX12,LGR4,LDB1,MACROH2A1,NAGLU,HOXA7,HOXC13,NOTCH1,SOX18,SRSF6,ITGB4,ASPRV1,ADAMTS2,CDH3,ASH1L,FOXE1,SOX21,ELOVL1,WNT10A,IRF6,CASP3,EXTL3,LSR,GRHL2,OVOL2,MED1,SHARPIN,NF1,RELA,ACER1,PALLD,CD109,SMO,FOXC1,TRADD,PTGES3,EPHA2,FOXI3,ERCC2,PIAS4,NGFR,FUZ,ERRFI1,HDAC2,ITGA3,ST14,CYP27B1,TRPC4AP,ALOXE3,LRP4,FGFR2,FOXQ1,PDGFA,FZD3,PPL,ACVR1B,COMP,EVPL,ZDHHC21,PIP5K1A…	c5_GO.Biological.Process
GOBP_CELLULAR_RESPONSE_TO_NITROGEN_COMPOUND	0.00158648	0.0595984	0.45506	0.23797	1.44802	475	SCNN1A,DPEP1,CTSD,UBR2,ZNF106,CAPN2,EGFR,LYN,RHOQ,NFE2L2,SP1,SESN1,ACTB,NR4A2,EGR1,IGF1R,NPR2,SH2B2,NSMF,CYP1B1,MIRLET7F1,RALB,FUT7,TNS2,RECQL5,USF1,PTK2,BRIP1,MBD5,LAMTOR1,SOS2,PPP1R1B,JAK1,RAP1GDS1,P2RX4,CEBPB,BRCA1,PRKCD,SLC27A4,GNAS,ATP2B4,ABL1,PKM,SOX9,CAV2,TRIB3,CFLAR,SOCS2,STAT6,RELA,SLC9A1,SREBF1,PTPN1,ARID1B,MDM2,CPEB4,GRIN1,NOD1,PPP3CA,CTNNA1,GRB7,SHC1,NGFR,MAVS,GPT,LAMTOR2,PRKCZ,ZEB1,B…	c5_GO.Biological.Process	0.0539629	0.398636	0.252961	0.173015	1.23966	489	RBX1,IRF3,PALM,PRMT5,GSK3A,INHBA,SHC1,TRIM41,ACHE,ZBTB7B,CEBPB,RPS6KB1,BRCA1,MIR195,AGRN,RBM4,TRIB3,NPR2,MIR455,ANO1,FUT7,CTNNA1,AGTRAP,FOXC2,MMP2,HTR1D,LRP1,STAT6,USF1,CAV1,PDGFC,GNRHR2,ZNF592,PDE2A,ACTB,GCLC,RPTOR,LAMTOR2,BCL11A,CHMP5,ZCCHC3,LARP1,BACE1,EPHA4,CDK2,ABL1,PIK3R2,INSRR,RPL23,ARHGEF2,TMEM38A,UBR2,ATP5F1A,XBP1,JAK3,CASP3,TP53,ADCY5,MYO5A,GNAS,FGF21,ATP1A3,SNX5,GNAI2,ITPR2,AKT2,RAPGEF…	c5_GO.Biological.Process
GOBP_REGULATION_OF_MYELOID_CELL_DIFFERENTIATION	0.00162009	0.0600012	0.45506	0.320367	1.66482	139	GPR137,LYN,FSTL3,ID2,HOXB8,HOXA9,JAG1,HOXA7,ZNF16,HOXA5,TGFB1,ISG15,RARA,CEBPB,GABPA,SMAP1,RUNX1,MYC,NFKBIA,P4HTM,PPP3CA,KITLG,SPI1,FOXP1,NCKAP1L,MAPK11,BGLAP,CSF1,CSF3R,ZFP36L1,RPTOR,CDC73,FOS,MEIS1,CASP8,RARG,HCLS1,RIPK1,PRKCA,ZBTB46,ACVR1B,ZFP36,CUL4A,PAF1,RCOR1,ACVR2A,HSPA9,PRMT1,MED1,IL5,PIAS3,NF1,CREB1,ITPKB,ACIN1,MEIS2,RNF41	c5_GO.Biological.Process	0.0123595	0.212792	0.38073	0.25116	1.52608	145	PRMT1,ACIN1,ISG15,INHBA,GPR137,ZFP36,HCLS1,CEBPB,ARNT,HOXB8,HAX1,LDB1,RCOR1,HOXA5,HOXA7,TGFB1,L3MBTL1,CD4,EIF6,MYC,RPTOR,LIF,PURB,MAPK11,RARG,ZFPM1,NCKAP1L,BRD1,MTURN,MED1,RNF41,NEDD9,NF1,TYROBP,FSTL3,HOXA9,FOS,MEIS1,MEIS2	c5_GO.Biological.Process
GOBP_POSITIVE_REGULATION_OF_EPIDERMIS_DEVELOPMENT	0.00162605	0.0600012	0.45506	0.5401	1.94304	26	CYP27B1,BMP4,PRKCH,ETV4,VDR,MACROH2A1,SFN,NCOA3,NME2,PTCH1,FGF2,NOTCH1,MED1,FOXC1,SULT2B1,OVOL2,NUMA1	c5_GO.Biological.Process	0.00426761	0.130069	0.407018	0.469876	1.85713	24	ETV4,MACROH2A1,NOTCH1,PTCH1,OVOL2,BMP4,MED1,SULT2B1,FOXC1,FGF2,CYP27B1,VDR,NME2,PTCH2	c5_GO.Biological.Process
VEGF signaling pathway ( VEGF signaling pathway ); datasource: inoh;	0.00163509	0.134737	0.45506	0.310407	1.63814	153	BAD,PAK6,MAP4K2,EGFR,PIK3CD,PRKCH,MAPK10,IGF1R,MET,BMPR1B,CDK3,PTK2,RPS6KA3,JAK1,ACVR2B,PRKCD,MAPK8,GRK6,IKBKB,VEGFB,MAPK9,RPS6KA2,NGFR,PLK3,MAPK11,MAPK12,PRKCZ,PRKAG1,PRKAR1A,MAP3K10,MKNK1,BMPR2,PDGFRA,AKT2,GRK4,PRKCG,FGFR2,RIPK1,NTRK1,MAPK3,PRKCA,PRKCE,ACVR1B,MAP3K11,PDPK1,SYK,MAPK13,ACVR2A,TGFBR1,PAK5,CSNK1E,RAF1,PRKCI,MAP3K14,RPS6KB2,CSNK1D,TEC,MAP2K7,MAP3K12	PathwayCommons11	0.153298	0.653238	0.149208	0.194484	1.17661	160	MAP2K7,WEE1,MAP3K11,MAPKAPK5,GSK3A,CDK3,PRKAG1,RPS6KB2,BAD,BMPR1B,RPS6KB1,PRKAR1B,ACVR2B,CSNK1A1,PRKCE,CSNK1E,CDK2,MAP4K2,VEGFB,MAPK11,MAPK12,JAK3,FGFR4,RPS6KA2,CAMK2G,PAK6,AKT2,PRKCD,MAPK9,MAPK14,IRAK1,TGFBR2,NGFR,RAF1,CSNK1G2,GRK6,LTK,BRAF,NTRK1,IKBKE,MAPK3,FGFR2,PRKCZ,PRKAB2,GRK4,BTK,MAP2K4,MAP3K5,ACVR1B,FGFR3,BMPR2,GRK2,IRAK2,RIPK1,MAP4K3,MTOR,CDK9,CSNK1D	PathwayCommons11
Huntington disease; datasource: panther;	0.00163629	0.134737	0.45506	0.355962	1.73006	88	CAPN2,RHOQ,SP1,CAPN3,ACTB,CAPN1,GRIN2D,TP63,TNFAIP8,DLG4,GAPDH,MAPK9,GRIN1,CAPNS1,RHOG,JUN,TP53,MAP3K10,FOS,CAPN10,CASP8,AKT2,HTT,WASL,TUBB6,GRIK4,ARF6,DNAH5,DYNLL2,GRIK5,CDC42,RAB8A,ARF5,BDNF,EP300,DYNLL1,AP2A1,MAP2K7,DCTN1,CYC1,APAF1,DNAL4	PathwayCommons11	0.00437127	0.538184	0.407018	0.307109	1.67089	91	MAP2K7,TUBB6,DYNC1LI2,ACTB,CAPN1,CASP3,CAPNS1,TP53,TUBB4B,GRIK5,ARF1,CREBBP,AKT2,DYNC1H1,DLG4,HAP1,KALRN,FOS,ARF5,CDC42,GAPDH,DYNLL2,MAPK9,DNAL4,ARF3,EP300,RHOQ,RHOG,CAPN5,TBP,GAPDHS,RAC1,HTT,TUBB2B,MAP2K4,ARPC1B,ARPC1A,ARL4D,HIP1,DNAH3,GRIK4,DCTN1,HIP1R,IFT57	PathwayCommons11
GOBP_REGULATION_OF_VOLTAGE_GATED_CALCIUM_CHANNEL_ACTIVITY	0.0016424	0.0600012	0.45506	0.561228	1.94048	22	AHNAK,MIR200C,CACNB3,STAC3,NOS1AP,CACNB4,GPR35,CALM3,NIPSNAP2,GNB5	c5_GO.Biological.Process	0.899408	0.967635	0.0498907	-0.169684	-0.677698	25	MIR93,NOS1AP,SRI,AHNAK	c5_GO.Biological.Process
GOBP_FAT_PAD_DEVELOPMENT	0.0016449	0.0600012	0.45506	0.783462	1.87435	7	TBL1XR1,FOSL2,ARRDC3,ARID5B	c5_GO.Biological.Process	0.343689	0.737595	0.09855	-0.41765	-1.08469	7	FOSL2,ARRDC3,UBB	c5_GO.Biological.Process
GOBP_INNER_DYNEIN_ARM_ASSEMBLY	0.00165181	0.0600012	0.45506	-0.634026	-1.99241	14	CFAP73,DNAI3,CCDC103,DNAH7,TEKT2,ZMYND10,DNAAF6,DNAAF5,CCDC39	c5_GO.Biological.Process	0.584677	0.855219	0.0714786	0.271166	0.895242	14	DNAH2,DNAAF5,TEKT2	c5_GO.Biological.Process
GOBP_REGULATION_OF_PHOSPHORUS_METABOLIC_PROCESS	0.00165197	0.0600012	0.45506	0.214435	1.36382	839	BAD,AXL,TNFRSF18,MEN1,MAP4K2,ANTKMT,HEXIM1,EEF1A1,CAPN2,MAPKAP1,PTPA,SMG7,EGFR,TNFRSF1A,CACTIN,PLXNB2,LYN,ATG14,SMAD7,TFAP4,EFNA1,PTPN6,BMP4,CDKN1B,DKK1,ACTB,PTPN13,IL11,TRIM65,EGR1,IGF1R,AKT1S1,NSMF,HMGA2,NOP53,SCARB1,MET,CBLC,PDGFA,CLCF1,ZNF16,NF2,RALB,ABCA2,CSF2,TAOK2,LMO4,ERBB3,FKBP8,CAPRIN2,TGFB1,PTK2,TESK1,LACC1,SPAG9,STK4,SMG6,MIR15A,DAB2IP,BMP6,PPP1R1B,AIDA,MACROH2A1,STK11,MOB3A,FGF5,PTGE…	c5_GO.Biological.Process	3.41498e-05	0.00704316	0.557332	0.200567	1.50935	848	MAP2K7,DVL2,AXL,CCND1,DLG3,MAP3K11,PKN1,PPP1R14B,GSK3A,PTPN6,TERF2IP,INHBA,ANTKMT,SPRY1,CACUL1,PRKAG1,TBK1,BAD,LACC1,NIBAN1,SMAD7,DDX3X,ADNP,LAT,HCLS1,NDUFS4,INCA1,PPP6R2,FKBP8,PPARA,MIDN,TRIB3,GAS6,CTDSP2,MERTK,CLN3,CREBL2,IL11,HAX1,DOK7,HEXIM1,BAX,LDB1,MACROH2A1,CHMP6,ABCA3,CCNF,PRKAR1B,SPHK2,ZFYVE28,TGFB1,CAV1,CCNT1,NSD1,ITGB2,PDGFC,NHLRC1,CNKSR3,ZNF592,CD4,RABGEF1,ACTB,RPTOR,FZD1,LIF,QARS1,MI…	c5_GO.Biological.Process
GOBP_L_ASPARTATE_IMPORT_ACROSS_PLASMA_MEMBRANE	0.00165227	0.0600012	0.45506	0.950977	1.69725	3	SLC1A5,SLC1A3	c5_GO.Biological.Process	0.562992	0.84805	0.0721798	-0.405054	-0.908965	5	SLC1A2,SLC1A1,SLC1A3	c5_GO.Biological.Process
GOBP_POSITIVE_REGULATION_OF_BIOMINERAL_TISSUE_DEVELOPMENT	0.0016678	0.060278	0.45506	0.485618	1.87817	35	BMP4,TFAP2A,SMAD3,BMPR1B,ISG15,VDR,BMP6,ACVR2B,CEBPB,OSR2,SLC20A2,RXRA,BMPR2,ANO6,ATF4	c5_GO.Biological.Process	0.0397537	0.357301	0.321776	0.349097	1.52407	34	ISG15,CEBPB,BMPR1B,TFAP2A,ACVR2B,BMP4,WNT4,FZD9,BMP7,ATF4,ADGRV1,BMPR2,VDR,ATRAID,OSR2,SLC20A2	c5_GO.Biological.Process
GOBP_ODONTOGENESIS_OF_DENTIN_CONTAINING_TOOTH	0.00168518	0.0606188	0.45506	0.403131	1.77897	59	EDAR,ADM,BMP4,NF2,ITGB6,WNT10A,ACVR2B,TP63,JAG2,CTNNA1,NGFR,MSX1,BAX,SOSTDC1,CSF1,CSF3R,RUNX2,PDGFRA,HDAC2,LAMA5,ACVR2A,BSG,TNC,SLC4A2,TBX1,FOXC1,CNNM4,ROGDI,FST	c5_GO.Biological.Process	0.01929	0.256449	0.352488	0.29927	1.54011	68	JAG2,TCIRG1,PPARA,CTNNA1,BAX,ANKRD11,ACVR2B,BSG,WNT10A,BCL2L11,BMP4,CCDC154,TBX1,FAM20A,SMO,FOXC1,FOXI3,NGFR,CSF3R,HDAC2,STIM1,BMP7,LRP4	c5_GO.Biological.Process
GOBP_STEROID_HORMONE_BIOSYNTHETIC_PROCESS	0.00170068	0.0608891	0.45506	0.539301	1.89602	24	ADM,H6PD,EGR1,BMP6,STARD3,NR3C1,ATP1A1,DKK3,LHB,DGKQ,CACNA1H	c5_GO.Biological.Process	0.641283	0.875739	0.0665892	0.223955	0.885155	24	NR3C1,CLCN2,HSD17B1,MED1,WNT4,STARD3	c5_GO.Biological.Process
WP_TGF_BETA_RECEPTOR_SIGNALING	0.00172136	0.0892278	0.45506	0.461457	1.8866	40	SMAD7,BMP4,SKIL,SMAD3,ITGB6,TGFB1,JAK1,TGIF1,MAPK9,JUN,FOS,RUNX2,NOG,THBS1,MAPK3,ENG,TGFBR1,SMAD2,FKBP1A,LEFTY1,EP300,TGFBR3	c2_curated.Canonical.Pathways	0.0968379	0.487152	0.202072	0.294772	1.35336	43	INHBA,SMAD7,TGFB1,LIF,FKBP1A,CREBBP,TGIF1,BMP4,FOS,MAPK9,SMAD1,TGFBR2,EP300,MAPK3,SMAD6,SKIL,NOG,LEFTY1,SMAD5	c2_curated.Canonical.Pathways
GOBP_REGULATION_OF_GLUCOCORTICOID_BIOSYNTHETIC_PROCESS	0.00172856	0.0614712	0.45506	0.780469	1.86719	7	H6PD,NR3C1,ATP1A1,DKK3,DGKQ	c5_GO.Biological.Process	0.350202	0.739655	0.0999277	0.404544	1.0899	8	NR3C1,WNT4	c5_GO.Biological.Process
GOBP_POSITIVE_REGULATION_OF_STRESS_ACTIVATED_PROTEIN_KINASE_SIGNALING_CASCADE	0.00173306	0.0614712	0.45506	0.360517	1.75656	93	LTBR,EDAR,MAP4K2,LYN,BMP4,INAVA,CARD9,TAOK2,DAB2IP,TRAF4,CD27,WNT7B,TNIK,NOD1,SPI1,SEMA3A,SPHK1,RB1CC1,MAP3K10,SEMA4C,IL1B,SASH1,HIPK2,RNF13,RIPK1,MAP3K11,STK3,MAPKBP1,UNC5CL,MIR181A2,KLHDC10,MBIP,PRMT1,IL1A,TAOK1	c5_GO.Biological.Process	0.821359	0.941491	0.0533478	0.148105	0.812748	92	MAP2K7,PRMT1,MAP3K11,CARD9,WNT7B,INAVA,MAP4K2,TRAF4,RASGRP1,SEMA4C,BMP4,MTURN,SH3RF3,DAB2IP,TAOK1,MAPK8IP1,LTBR,FGF19,MAP2K4,MAP3K5,RIPK1,ANKRD6,CRK,WNT7A,RB1CC1,MAPKBP1,CD27,STK3,IGFBP6,MAP3K10,APP	c5_GO.Biological.Process
GOBP_FACE_DEVELOPMENT	0.00177241	0.0625761	0.45506	0.466392	1.89874	42	SGPL1,DKK1,PAX9,ZFAND5,MKKS,RARA,PRICKLE1,ALDH1A3,GRHL2,HOXB3,MSX1,ARID5B,RARG,PDGFRA,SRF,NOG,MAPK3,RRAS,TIPARP,MMP2,NIPBL,RAF1,EP300,TBX1	c5_GO.Biological.Process	0.0218241	0.270035	0.352488	0.33969	1.59773	44	ARID5B,MMP2,ANKRD11,ALDH1A3,RARG,MKKS,GRHL2,RRAS,TBX1,PTPN11,RAF1,EP300,HOXB3,BRAF,MAPK3,BBS4,MSX1,NOG,TGFB3,NIPBL,COL1A1,MAP2K2	c5_GO.Biological.Process
GOBP_POSITIVE_REGULATION_OF_CATALYTIC_ACTIVITY	0.00180186	0.0633226	0.45506	0.220748	1.37929	655	CYP27B1,BAD,AXL,AGAP11,MAP4K2,ANTKMT,CTSD,MBP,PTPA,EGFR,LYN,ATG14,EFNA1,DKK1,EGR1,IGF1R,RGP1,PNKP,HMGA2,SCARB1,CARD9,MET,PDGFA,FNTA,ARHGAP29,ZNF16,SMAD3,RALB,TAOK2,LMO4,ERBB3,NLRP1,POLG2,TGFB1,RTN4R,NOS1AP,PTK2,VDR,SOS2,MIR15A,MIR16-1,DAB2IP,CACNA1D,STK11,RAP1GDS1,PTGES3,PDCD6,TBC1D17,C5AR1,PRKCD,SLC27A4,TIAM2,SIPA1L1,ATP2B4,ABL1,MIR29B1,CAV2,TRIB3,MAPK8,DOK7,TRAF4,DLG4,MYC,GRHL2,RACK1,PTPN1,FOXJ…	c5_GO.Biological.Process	0.0092425	0.191354	0.38073	0.178759	1.31593	669	MAP2K7,DVL2,AXL,CCND1,DLG3,MAP3K11,SIPA1,MAPKAPK5,SGSM2,GSK3A,UHRF1,UBE2L3,ANTKMT,CACUL1,PRKAG1,BAD,FZR1,DDX3X,LAT,CARD9,GSN,MIR195,AGRN,CTSK,ARHGEF16,TRIB3,LGR4,GAS6,RGP1,ISCU,MERTK,DOK7,BAX,HTRA2,TGFB1,CAV1,ITGB2,PDGFC,CACNA1D,FDX2,CD4,MYC,RPTOR,MIR15A,MIR16-1,COA8,RASGRP2,HSPE1,HSPD1,RGL3,NOS2,ANG,EPHA4,NR1H3,MAP4K2,ABL1,CDH3,INSRR,PSME3,ORAI1,PTPA,XRCC1,TBC1D8,SNX9,PLXNB1,MAPK12,HSP90AA1,NTF3…	c5_GO.Biological.Process
WP_CARDIOMYOCYTE_SIGNALING_PATHWAYS_CONVERGING_ON_TITIN	0.00181006	0.090952	0.45506	0.558801	1.95644	22	TCAP,NBR1,MDM2,NUP62,PRKAR1A,ANKRD23,SRF,TRIM55,CRYAB,PRKCA,ANKRD2,GUCD1,RAF1	c2_curated.Canonical.Pathways	0.706931	0.896771	0.0613026	0.223387	0.827893	21	NBR1,GUCD1,ANKRD23,RAF1,TCAP,FHL1,NPR1,MAP2K2,TRIM55	c2_curated.Canonical.Pathways
Apoptosis	0.00181319	0.014022	0.45506	0.353556	1.70612	94	BAD,TRAF1,CAPN2,PIK3CD,TNFRSF1A,ACTB,MAPK10,PSMB7,PRKCD,MAPK8,UBC,NRAS,RELA,IKBKB,NFKBIA,MCL1,KRAS,SFN,MAPK9,BAX,JUN,TP53,PSMB2,FOS,CASP8,AKT2,TNFRSF10D,CASP10,RIPK1,NTRK1,MAPK3,PIK3R3	NanoString_Genes	0.399232	0.759196	0.0891647	0.186826	1.02046	94	MCL1,BAD,NRAS,BAX,PSMB10,ACTB,PIK3R2,CASP3,TP53,UBC,TNFRSF10A,AKT2,C1QBP,RELA,FOS,PRKCD,TNFRSF10D,E2F1,CDH1,MAPK9,RAF1,NTRK1,MAPK3,CASP9,PSMB5,TNFRSF1A,BCL6B,MAP3K5,RIPK1,DSP,TRAF1,PIK3CD,BBC3,MAP2K2	NanoString_Genes
WP_8Q11_23_RB1CC1_COPY_NUMBER_VARIATION	0.00181553	0.090952	0.45506	0.648057	1.95603	14	GABARAPL2,GABARAP,PTK2,GABARAPL1,ULK1,RB1CC1,TP53	c2_curated.Canonical.Pathways	0.185404	0.602803	0.142057	0.380083	1.24666	14	GABARAP,ATG101,TP53,ULK1,MAP3K5,RB1,ATG13,RB1CC1,GABARAPL2	c2_curated.Canonical.Pathways
GOBP_EMBRYONIC_HEART_TUBE_LEFT_RIGHT_PATTERN_FORMATION	0.00182925	0.0638738	0.45506	0.898101	1.7645	4	IFT122,CITED2,MEGF8	c5_GO.Biological.Process	0.559055	0.844782	0.0725352	-0.405862	-0.910779	5	IFT122,PITX2	c5_GO.Biological.Process
GOBP_EPITHELIAL_CELL_APOPTOTIC_PROCESS	0.00183972	0.0638738	0.45506	0.350213	1.72052	99	NFE2L2,CDKN1B,KRT18,KRT8,IL11,IGF1R,MIR125A,BTC,TGFB1,STK4,MIR15A,DAB2IP,MIR101-1,ABL1,CFLAR,JAG2,NFKBIZ,BAX,ZFP36L1,TIA1,CAPN10,CASP6,MIR375,BMPR2,MDK,MIR24-1,ANO6,CAST,THBS1,ARF6,WNT11,ZFP36,PDPK1,CARM1,STK3,TCF7L2,MIR126,PRKCI	c5_GO.Biological.Process	0.0730337	0.434388	0.227987	0.228218	1.30002	103	JAG2,ZFP36,GSN,PPARA,GAS6,IL11,BAX,TGFB1,SRSF6,MIR15A,ABL1,KRT18,KRT8,MDK,CASP3,FGF21,MIR125A,DAB2IP,KRIT1,E2F1,WNT11,TGFBR2,ADAR,PIAS4,NDNF,GATA2,BRAF,NFE2L2,NKX2-5,MIR126,MIR590,CASP9,HMOX1,TIA1,MAP3K5,BMPR2,GPER1,RB1,NFKBIZ,CFLAR,NUPR1,STK3,PDPK1,MIR182	c5_GO.Biological.Process
GOBP_NEGATIVE_REGULATION_OF_CYTOKINE_PRODUCTION_INVOLVED_IN_IMMUNE_RESPONSE	0.00184267	0.0638738	0.45506	0.601607	1.96483	18	AXL,SMAD7,BCL6,TGFB1,NLRX1,APOA2,FOXP3,PRG2	c5_GO.Biological.Process	0.134576	0.564256	0.173748	0.398195	1.36954	17	AXL,SMAD7,TGFB1,RABGEF1,JAK3,BST2	c5_GO.Biological.Process
KEGG_TYPE_II_DIABETES_MELLITUS	0.0018853	0.090952	0.45506	0.491293	1.89851	31	PIK3CD,MAPK10,CACNA1D,PRKCD,PKM,MAPK8,SOCS2,IKBKB,MAPK9,PRKCZ,IRS1,MAPK3,PRKCE,PIK3R3	c2_curated.Canonical.Pathways	0.781925	0.918356	0.0561767	0.182826	0.790825	35	CACNA1D,PRKCE,PIK3R2,PRKCD,MAPK9,SOCS1,SOCS2,MAPK3,PRKCZ,MAFA,MTOR,PIK3CD,IRS4,CACNA1A,INS	c2_curated.Canonical.Pathways
GOBP_PROGESTERONE_BIOSYNTHETIC_PROCESS	0.00188607	0.0650635	0.45506	0.866551	1.84976	5	ADM,EGR1,STARD3,LHB,DGKQ	c5_GO.Biological.Process	0.769697	0.92936	0.0582216	-0.371314	-0.754082	4	ADM,DGKQ	c5_GO.Biological.Process
GOBP_MEIOTIC_CHROMOSOME_SEPARATION	0.00190222	0.0650635	0.45506	0.815079	1.86493	6	CHFR,TTK	c5_GO.Biological.Process	0.420408	0.781519	0.0897105	0.418489	1.02331	6	CHFR,NCAPH2,ESPL1	c5_GO.Biological.Process
GOBP_BIOMINERAL_TISSUE_DEVELOPMENT	0.00190259	0.0650635	0.45506	0.342494	1.69512	106	CYP27B1,BCOR,FOSL2,BMP4,TFAP2A,SMAD3,BMPR1B,ITGB6,TGFB1,ISG15,VDR,TUFT1,BMP6,ACVR2B,PRICKLE1,CEBPB,NBR1,SOX9,OSR2,SLC20A2,ERCC2,SNX10,BGLAP,ECM1,RFLNA,RXRA,BMPR2,ZBTB40,ANO6,TRPM4,ATF4,FGFR2,LGR4,WNT11,S1PR1,ACVR2A,IFT80,NOTCH1	c5_GO.Biological.Process	0.0115314	0.205038	0.38073	0.263314	1.51166	110	ZBTB40,ISG15,CEBPB,BMPR1B,TCIRG1,NBR1,TFAP2A,PPARA,LGR4,GAS6,TGFB1,ACVR2B,NOTCH1,TUFT1,BMP4,CCDC154,TBX1,FAM20A,WNT11,WNT4,ATG4B,ERCC2,STIM1,MATN1,FZD9,CYP27B1,PTH1R,BMP7,LOX,S1PR1,HIF1A,NOTUM,FGFR2,ATF4,ADGRV1,FGFR3,COMP,BMPR2,SBDS,VDR,LTBP3,TRPM4,COL1A1,WLS,MIR208A,ATRAID,OSR2,CLEC3B,SLC20A2	c5_GO.Biological.Process
KEGG_PROSTATE_CANCER	0.00190358	0.090952	0.45506	0.388274	1.79706	69	BAD,EGFR,PIK3CD,CDKN1B,IGF1R,PDGFA,SOS2,NRAS,RELA,IKBKB,NFKBIA,KRAS,MDM2,TP53,CCND1,PDGFRA,AKT2,TCF7,ATF4,FGFR2,MAPK3,PIK3R3,PDPK1,HSP90B1,GSTP1,TCF7L2,RAF1,EP300,PIK3R2,HSP90AA1,CREB1	c2_curated.Canonical.Pathways	0.410788	0.782044	0.0919686	0.190719	1.01203	75	CCND1,BAD,NRAS,PDGFC,CREB5,CDK2,PIK3R2,INSRR,HSP90AA1,HSP90AB1,TP53,CREBBP,AKT2,RELA,E2F1,GSTP1,RAF1,EP300,BRAF,MAPK3,CASP9,FGFR2,PDGFA,ATF4	c2_curated.Canonical.Pathways
GOBP_ENDODERM_DEVELOPMENT	0.00192209	0.0653145	0.45506	0.398134	1.77105	62	BMP4,DKK1,HMGA2,SMAD3,PAX9,LAMC1,MACROH2A1,KIF16B,TNRC6A,NKX2-1,MMP15,ITGB5,ZFP36L1,CDC73,HOXC11,EXT1,LAMB3,PELO,NOG,PAF1,SOX2,SMAD2,NOTCH1,SSBP3,MMP2,DUSP2,COL7A1,ARC,COL8A1	c5_GO.Biological.Process	0.79572	0.933884	0.0549074	0.158317	0.799513	62	INHBA,MACROH2A1,MMP2,NOTCH1,ITGB2,HOXC11,DUSP1,SOX2,BMP4,LAMC1,MED12	c5_GO.Biological.Process
KEGG_MAPK_SIGNALING_PATHWAY	0.0019229	0.090952	0.45506	0.286306	1.5704	197	MAP4K2,EGFR,MECOM,TNFRSF1A,CACNB3,RAC3,MAPK10,PDGFA,TAOK2,TGFB1,STK4,SOS2,CACNA1D,RPS6KA3,FGF5,MAPK8,CACNB4,NRAS,RELA,IKBKB,MYC,NFATC2,KRAS,MAPK9,RPS6KA2,IL1R1,PPP3CA,MAPK11,MAPK12,JUN,MAP4K4,TP53,FGF17,IL1B,FOS,MKNK1,CACNA1H,PPP5C,PDGFRA,AKT2,MAP3K20,SRF,RPS6KA4,NTF4,ATF4,PRKCG,FGFR2,NTRK1,MAPK3,PRKCA,MAP3K11,FGF2,MAPK13,HSPA8,STK3,RRAS,TGFBR1,PLA2G4B,JMJD7-PLA2G4B,CDC42,PLA2G2C,RRAS2,BDNF,RAF1,…	c2_curated.Canonical.Pathways	0.00420705	0.106102	0.407018	0.241988	1.51762	196	MAP2K7,RELB,MAP3K11,MAPKAPK5,ELK4,GNG12,NRAS,MKNK2,TGFB1,PTPN7,JUND,CACNA1D,MYC,RASGRP2,MAP4K2,RPS6KA4,DUSP1,MAPK11,MAPK12,NTF3,NFKB2,CASP3,FGFR4,TP53,RPS6KA2,FGF21,RASGRP4,RASGRP1,AKT2,NTF4,PPP5C,RRAS,NF1,RELA,FOS,RRAS2,CDC42,CACNB1,LAMTOR3,MAPK9,HSPA8,TAOK1,MAPK14,TGFBR2,RAF1,CACNG8,CACNG6,DUSP4,MAPK8IP1,FGF2,BRAF,FGF19,NTRK1,MAPK3,RAC1,CACNB4,FGF22,FGFR2,PDGFA,MAP2K4,TNFRSF1A,ATF4,MAP3K5,FGFR3…	c2_curated.Canonical.Pathways
REACTOME_SIGNALING_BY_TGFB_FAMILY_MEMBERS	0.00192317	0.090952	0.45506	0.328491	1.65173	109	MEN1,FSTL3,SMAD7,SP1,SKIL,SMAD3,BMPR1B,ITGB6,TGFB1,F11R,CGN,PMEPA1,ACVR2B,TGIF1,UBE2M,UBC,MYC,JUNB,PRKCZ,ZFYVE16,ITGB5,STUB1,LTBP2,BMPR2,CCNT2,UBE2D1,NOG,MAPK3,USP9X,PPP1CA,ACVR1B,ACVR2A,TGFBR1,SMAD2,FKBP1A,WWTR1,EP300,TGFBR3,XPO1,FST,FSTL1,PPM1A,STRAP,SMURF2,RNF111,TGFB2,ITGB3,RHOA,CDK8	c2_curated.Canonical.Pathways	0.0647104	0.425738	0.287805	0.247682	1.41245	111	INHBA,SMAD7,BMPR1B,TGFB1,F11R,ACVR2B,CCNT1,MYC,MEN1,FKBP1A,LTBP4,UBE2D3,AMH,CGN,UBC,TGIF1,XPO1,FSTL3,USP9X,SMAD1,TGFBR2,ARHGEF18,EP300,ITGB8,NCOR2,TGIF2,YBX1,WWTR1,MAPK3,SMAD6,PRKCZ,SKIL,DRAP1,E2F4,ITGB5,ACVR1B,BMPR2,NOG,SMAD5,TGFB3,LTBP3,CDK9,LTBP1,CDK8,STUB1	c2_curated.Canonical.Pathways
GOBP_RESPONSE_TO_MECHANICAL_STIMULUS	0.00192706	0.0653145	0.45506	0.314821	1.63889	142	BAD,KCNK4,LTBR,CAPN2,SLC38A2,TNFRSF1A,PLEC,FOSB,TMEM87A,IGF1R,F11R,PTK2,MKKS,CITED2,PIEZO1,BMP6,TCAP,XPA,SOX9,MAPK8,RELA,SLC9A1,NFKBIA,BAG3,BAK1,BGLAP,SUN1,ANKRD23,CNN2,IL1B,FOS,PHF24,CASP8,MDK,HTT,GCLC,THBS1,PTCH1,NTRK1,MAPK3,WHRN,FGF2,WNT11,ENG,CLCN6,ABHD12,STRBP,TNC,MMP2,CRADD,RAF1,MAP3K14	c5_GO.Biological.Process	0.2603	0.684475	0.113787	0.185114	1.11138	139	SLC2A1,BAD,KCNK4,GSN,RPS6KB1,MMP2,MAG,F11R,PTCH1,PDE2A,GCLC,FOSB,BACE1,XPA,CNN2,SUN1,NRXN2,MDK,PKD2L1,MKKS,HABP4,ANKRD23,TNFRSF10A,PIEZO1,RELA,FOS,MEIS2,PSPH,WNT11,MAPK14,SLC38A2,P2RX3,RAF1,TCAP,LTBR,UCN,FGF2,BAG3,NTRK1,MAPK3,HTT,MAP2K4,TNFRSF1A,PPL,ADGRV1,SLC9A1,CHEK1,STRBP,PKD2,KCNJ2,CHRNA10,CLCN6,COL1A1,TMEM120A	c5_GO.Biological.Process
PID_CD8_TCR_DOWNSTREAM_PATHWAY	0.00194227	0.090952	0.45506	0.47756	1.87732	35	TNFRSF18,CD247,EGR1,MAPK8,NRAS,NFATC2,KRAS,JUNB,MAPK9,PPP3CA,JUN,FOS,NFATC1,MAPK3,PRKCA,PRKCE,TNFRSF4	c2_curated.Canonical.Pathways	0.452	0.804966	0.0845557	0.233728	0.995034	33	NRAS,NFATC3,PTPN7,PRKCE,FOS,MAPK9,RAF1,BRAF,STAT4,MAPK3,CD8A,PPP3CB,MAP2K2,NFATC2,CD247	c2_curated.Canonical.Pathways
WP_EGFR_TYROSINE_KINASE_INHIBITOR_RESISTANCE	0.00194691	0.090952	0.45506	0.384259	1.78113	70	BAD,AXL,EGFR,PIK3CD,IGF1R,MET,PDGFA,ERBB3,SOS2,JAK1,NRAS,MYC,KRAS,SHC1,BAX,CCND1,PDGFRA,AKT2,IL6R,PRKCG,FGFR2,MAPK3,PRKCA,PIK3R3,FGF2,PDPK1,RRAS,RRAS2,RAF1,RPS6KB2,PIK3R2,NF1	c2_curated.Canonical.Pathways	0.114754	0.519343	0.188204	0.243101	1.28274	72	AXL,CCND1,RPS6KB2,BAD,SHC1,RPS6KB1,NRAS,GAS6,BAX,PDGFC,MYC,PIK3R2,BCL2L11,EIF4EBP1,AKT2,RRAS,NF1,RRAS2	c2_curated.Canonical.Pathways
GOBP_CELLULAR_RESPONSE_TO_HYDROPEROXIDE	0.00196838	0.0664198	0.431708	0.814499	1.8636	6	PRKCD,TP53INP1,OXR1	c5_GO.Biological.Process	0.285433	0.69857	0.111011	-0.523241	-1.17418	5	OXR1,PRKD1,TP53INP1,MGST1	c5_GO.Biological.Process
Formation of the beta-catenin:TCF transactivating complex; datasource: reactome;	0.00197192	0.143351	0.431708	0.511292	1.86205	25	MEN1,BCL9L,PYGO2,MYC,TLE1,TLE3,KMT2D,CDC73,KAT5,TCF7,TCF7L2,EP300	PathwayCommons11	0.407843	0.85252	0.0891647	0.258457	1.01754	25	KMT2D,PYGO2,MYC,MEN1,CREBBP,EP300,ASH2L,KAT5,TRRAP,SMARCA4,BCL9	PathwayCommons11
AP-1 transcription factor network; datasource: pid;	0.00200358	0.143351	0.431708	0.407898	1.74093	51	FOSL2,TRIP6,SP1,FOSB,CDKN1B,EGR1,CSF2,TGFB1,NR3C1,MYC,NFATC2,JUNB,JUN,TP53,CCND1,FOS,NFATC1,MT2A,ATF3,TCF7L2,JUND,EP300,COPS5,IL5,CREB1	PathwayCommons11	0.020401	0.572801	0.352488	0.336608	1.5551	45	CCND1,NR3C1,MAFG,NFATC3,TGFB1,JUND,ELF1,MYC,FOSB,BAG1,DUSP1,BCL2L11,TP53,TRIP6,FOS	PathwayCommons11
WP_VITAMIN_A_AND_CAROTENOID_METABOLISM	0.00200929	0.0921394	0.431708	0.569888	1.90524	19	SCARB1,RARA,CYP26B1,ALDH1A3,DHRS3,RXRA,RARG,RDH10,SULT2B1,BCO2	c2_curated.Canonical.Pathways	0.0456935	0.394654	0.321776	0.423896	1.55154	20	RARB,BCO2,ALDH1A3,RARG,RDH10,RBP7,SULT2B1,CRABP2	c2_curated.Canonical.Pathways
GOBP_ADRENAL_GLAND_DEVELOPMENT	0.00201172	0.0674646	0.431708	0.598014	1.9531	18	CYP1B1,SMAD3,CITED2,NR3C1,DKK3,ARID5B,MDK,PDGFRA,WNT11,SMAD2,NF1	c5_GO.Biological.Process	0.299197	0.708921	0.10925	0.305668	1.13452	20	NR3C1,ARID5B,MDK,NF1,WNT11,WNT4	c5_GO.Biological.Process
GOBP_LEUKOCYTE_CELL_CELL_ADHESION	0.00201704	0.0674646	0.431708	0.271326	1.53389	245	BAD,SMARCD2,LYN,SMAD7,MIR141,PTPN6,FLOT2,BMP4,AP3D1,ACTB,ARG2,BCL6,NT5E,FUT4,HAS2,MIRLET7E,MIR125A,FUT7,SOX12,F11R,DHPS,RARA,NRARP,SHB,CEBPB,RHOH,ABL1,RUNX1,RELA,CD27,CORO1A,ARID1B,TNFAIP8L2,FOXJ1,NFKBIZ,ARID1A,PPP3CA,KITLG,SOX13,NCKAP1L,FOXP3,IL4I1,PRKCZ,PRKAR1A,ZBTB7B,EFNB3,TNFSF4,KAT5,IL1B,SMARCC1,ARID2,MDK,PODXL2,EXT1,TNIP1,MADCAM1,LAG3,CCDC88B,NFAT5,ASS1,OLR1,PDPK1,CD24,SYK,PAWR,IL6ST,WNK1,N…	c5_GO.Biological.Process	0.0792453	0.451415	0.21925	0.189112	1.25185	258	NFAT5,MIR141,PTPN6,BAD,SMAD7,ZBTB7B,CEBPB,PPARA,FUT7,LOXL3,F11R,TNFSF9,CAV1,TNFRSF13C,MARCHF7,ITGB2,CD4,DHPS,ACTB,WNK1,HSPD1,AP3D1,STK10,RASAL3,FERMT3,ABL1,CCDC88B,CARD11,XBP1,VAV1,MDK,JAK3,CASP3,EFNB3,NCKAP1L,RASGRP1,BMP4,SMARCE1,MADCAM1,MIRLET7E,MIR125A,RELA,NFKBID,AMBRA1,CERCAM,FLOT2,PTPN11,CD47,SOCS1,STAT5B,IRAK1,SMARCD2,TGFBR2,ADORA2A,ACTL6B,SMARCA2,DLG1,SLC7A1,SCRIB,TNFAIP8L2,MALT1,ADAM8,BM…	c5_GO.Biological.Process
REACTOME_TRNA_PROCESSING_IN_THE_NUCLEUS	0.00202103	0.0921394	0.431708	-0.379518	-1.75057	54	NUP54,NUP155,RPP25,NUP210,SEH1L,TRNT1,NUP35,NUP43,NUP98,POM121C,CSTF2,NUP58,NUP133,ELAC2,C2orf49,NUP214,POP7,RAE1,NUP42,CPSF4,TPR,FAM98B,NDC1,RANBP2,POP1,NUP37,POP4,NUP107,TSEN15,POP5,NUP160,RPP30,RTRAF	c2_curated.Canonical.Pathways	0.0177371	0.234613	0.352488	-0.31693	-1.54475	54	NUP155,C2orf49,POP7,RAN,SEH1L,NUP35,NUP37,NUP210,TSEN2,FAM98B,NDC1,CSTF2,NUP54,TPR,NUP133,ZBTB8OS,NUP153,POP5,NUP88,CPSF4,TRNT1,RAE1,POP1,TSEN54,RPP30,RPP40	c2_curated.Canonical.Pathways
GOBP_PEPTIDYL_AMINO_ACID_MODIFICATION	0.00204864	0.0679315	0.431708	0.221591	1.39305	714	EEF1AKMT3,TNFRSF18,ANTKMT,CLK4,MAPKAP1,CPA4,SIRT5,EGFR,SAE1,TNFRSF1A,LYN,SMAD7,EFNA1,PTPN6,MAST4,PRKCH,CAPN3,DKK1,IL11,EGR1,IGF1R,BAZ1B,CBLC,PDGFA,SET,CLCF1,NF2,PML,CSF2,SETBP1,ERBB3,CAPRIN2,TGFB1,SETD1B,NOS1AP,PTK2,DHPS,STK4,VCPKMT,MIR15A,BMP6,RPS6KA3,JAK1,STK11,NDUFAF5,LOXL1,BRCA1,LRRK1,PRKCD,ATP2B4,ABL1,TTK,ULK1,SUMO2,TTC36,KMT2A,MAPK8,UBE2K,EHD4,SNTA1,METAP1,PPIL3,DOK7,RELA,IKBKB,DLG4,ZDHHC1,…	c5_GO.Biological.Process	3.04634e-07	0.000258296	0.674963	0.228026	1.6882	723	DMPK,CDC42BPG,PRMT1,DLG3,RUVBL2,MAPKAPK5,PKN1,SENP3,PRMT5,DPH1,GSK3A,PTPN6,P3H4,FKBP10,ANTKMT,RPS6KB2,TBK1,NAA60,TBC1D24,SMAD7,SIRT7,ADNP,HCLS1,NKTR,RPS6KB1,BRCA1,ARNT,SBK1,SUMO2,KAT14,MKNK2,PRDM12,TOP1,CREBL2,IL11,HAX1,DOK7,CDC42BPA,BAX,CHMP6,LOXL3,KAT2A,ZFYVE28,TGFB1,CAV1,NTMT1,GALNT16,BAZ1B,CSNK1A1,NSD1,DPY19L3,HDAC7,ITGB2,PDGFC,CNKSR3,SGK2,PRKD2,ZNF592,P3H3,CD4,MGAT5B,DOT1L,ZDHHC1,DHPS,TTLL11…	c5_GO.Biological.Process
GOBP_REGULATION_OF_LYMPHOCYTE_ACTIVATION	0.00204881	0.0679315	0.431708	0.249564	1.45276	324	BAD,AXL,SMARCD2,LYN,ID2,SMAD7,ZFP36L2,PTPN6,FLOT2,BMP4,AP3D1,ACTB,ARG2,BCL6,CLCF1,SOX12,TGFB1,DHPS,RARA,SOS2,CYP26B1,SHLD1,KLRD1,NRARP,EXOSC3,SHB,CEBPB,RHOH,KMT5B,ABL1,RUNX1,KMT5C,STAT6,CD22,CD27,NFATC2,CORO1A,JUNB,ARID1B,TNFAIP8L2,FOXJ1,NFKBIZ,ARID1A,TNFSF13,PPP3CA,KITLG,SOX13,SPI1,NCKAP1L,FOXP3,IL4I1,PRKCZ,ZEB1,RHBDD3,PRKAR1A,ZBTB7B,EFNB3,ZFP36L1,TNFSF4,KAT5,IL1B,SMARCC1,ARID2,MDK,AP1G1,TCF7,FO…	c5_GO.Biological.Process	0.139576	0.571533	0.156312	0.170673	1.16879	322	AXL,BLOC1S3,PKN1,TNFSF13,PTPN6,INHBA,BAD,SMAD7,ZBTB7B,LAT,CEBPB,CD320,GAS6,MERTK,LOXL3,STAT6,KAT2A,TGFB1,TNFSF9,CAV1,TNFRSF13C,MARCHF7,CD4,DHPS,ACTB,HSPD1,AP3D1,RASAL3,ABL1,CCDC88B,CARD11,XBP1,VAV1,MDK,JAK3,CASP3,EFNB3,NCKAP1L,RASGRP1,TYRO3,BMP4,SMARCE1,RNF41,NEDD9,TYROBP,NFKBID,ZEB1,AMBRA1,FLOT2,PTPN11,CD47,SOCS1,XRCC6,STAT5B,SMARCD2,TGFBR2,ADORA2A,ACTL6B,SMARCA2,ZFP36L2,MAPK8IP1,DLG1,RHBDD3,SLC…	c5_GO.Biological.Process
REACTOME_TRANSPORT_OF_THE_SLBP_DEPENDANT_MATURE_MRNA	0.00206126	0.092855	0.431708	-0.459875	-1.90246	35	NUP54,NUP155,NUP210,SEH1L,NUP35,NUP43,NUP98,POM121C,NCBP2,ALYREF,NUP58,SLBP,NUP133,NUP214,RAE1,NUP42,TPR,EIF4E,NDC1,RANBP2,NUP37,NCBP1,NUP107	c2_curated.Canonical.Pathways	0.0423898	0.374674	0.321776	-0.355933	-1.55545	35	NUP155,EIF4E,SEH1L,NUP35,NUP37,NUP210,NDC1,NUP54,TPR,NUP133,NUP153,SLBP,NUP88,RAE1,NUP160,NXF1,ALYREF,NUP188,NUP62,NUP214,NCBP2,NUP205,NCBP1,NUP58	c2_curated.Canonical.Pathways
mTOR signaling pathway; datasource: pid;	0.00209394	0.143351	0.431708	0.409614	1.7939	56	MAPKAP1,AKT1S1,PML,ULK1,YWHAZ,NRAS,IKBKB,SREBF1,KRAS,SFN,RICTOR,EIF4A1,IRS1,RB1CC1,RPTOR,MAPK3,PRKCA,YWHAG,YWHAQ,PDPK1,PRR5,RHEB,MLST8,RAF1	PathwayCommons11	0.172542	0.66216	0.142901	0.245255	1.20615	59	EIF4A1,RPS6KB1,NRAS,EIF4B,YWHAZ,RPTOR,CDK2,PRR5,EIF4EBP1,EEF2,RRAGD,ULK1,YY1,MLST8,RAF1,AKT1S1,TSC1,BRAF,MAPK3,POLDIP3,MTOR,ATG13,RB1CC1,MAP2K2,PDPK1,SREBF1,CLIP1,TSC2	PathwayCommons11
GOBP_VIRAL_TRANSCRIPTION	0.00211005	0.0696589	0.431708	0.447218	1.79686	40	HEXIM1,USF2,SP1,TFAP4,HMGA2,USF1,TRIM8,JUN,UBP1,CCNT2,TRIM11,INPP5K,DHX9,ZFP36,TRIM13,IFITM3,MID2,EP300,RSF1,TARBP2	c5_GO.Biological.Process	0.184739	0.618801	0.143759	0.262313	1.20709	41	PSMC3,TRIM8,ZFP36,HEXIM1,USF1,CCNT1,RSF1,USF2	c5_GO.Biological.Process
snRNP Assembly; datasource: reactome;	0.00211149	0.143351	0.431708	-0.391814	-1.77462	50	NUP54,NUP155,TGS1,NUP210,SEH1L,DDX20,NUP35,CLNS1A,NUP43,NUP98,GEMIN5,POM121C,NCBP2,NUP58,SNRPF,GEMIN4,NUP133,SNRPB,NUP214,RAE1,GEMIN8,SNRPD1,TPR,NDC1,RANBP2,SNRPD2,NUP37,NCBP1,NUP107	PathwayCommons11	0.507326	0.880694	0.0738053	0.200743	0.952407	50	GEMIN7,SNUPN,PRMT5,GEMIN6,NUP50,NUP43,POM121,SNRPD3,WDR77	PathwayCommons11
5'-Phospho-ribosyl-4-carboxamido-5-amino-imidazole + Pyrophosphate = 5-Amino-4-imidazole-carboxyamide + D-5-Phospho-ribosyl 1-diphosphate ( Purine nucleotides and Nucleosides metabolism ); datasource: inoh;	0.00212471	0.143351	0.431708	0.998087	1.32747	1	APRT	PathwayCommons11	0.16499	0.656756	0.153159	0.928419	1.22765	1	APRT	PathwayCommons11
adenine and adenosine salvage I; datasource: humancyc;	0.00212471	0.143351	0.431708	0.998087	1.32747	1	APRT	PathwayCommons11	0.16499	0.656756	0.153159	0.928419	1.22765	1	APRT	PathwayCommons11
IGF1 pathway; datasource: pid;	0.00212615	0.143351	0.431708	0.533068	1.97418	26	BAD,IGF1R,PTK2,PRKCD,YWHAZ,RACK1,PTPN1,SHC1,PRKCZ,IRS1,PXN,BCAR1	PathwayCommons11	0.339216	0.828451	0.0999277	0.264652	1.0709	27	BAD,SHC1,RPS6KB1,YWHAZ,PRKCD,PTPN11,RAF1,PXN,PRKCZ,BCAR1,CRK,RACK1,PDPK1	PathwayCommons11
GOBP_POSITIVE_REGULATION_OF_HORMONE_BIOSYNTHETIC_PROCESS	0.00212877	0.0699314	0.431708	0.741355	1.92663	9	ADM,EGR1,IGF1R,BMP6	c5_GO.Biological.Process	0.607803	0.861205	0.0704501	0.341308	0.877324	7	ARNT,WNT4,HIF1A	c5_GO.Biological.Process
REACTOME_PTEN_REGULATION	0.00213188	0.0949064	0.431708	0.32873	1.67226	118	MECOM,CHD3,MTA3,CHD4,EGR1,PML,MOV10,PHC3,LAMTOR1,PSMB7,UBC,NEDD4,TNRC6A,MAF1,MTA1,MTA2,ATN1,LAMTOR2,JUN,TP53,PSMB2,RPTOR,PSMD4,STUB1,MKRN1,PSMD13,AKT2,HDAC7,PSMC2,MAPK3,PSMD9,PSMA5,HDAC2,GATAD2A,SALL4,TNRC6C,PSMC6,RCOR1,RHEB,PSMA6,MLST8,PSMB10,PSMA4,PSMD1,CBX8	c2_curated.Canonical.Pathways	0.00540252	0.119519	0.407018	0.277763	1.5932	120	PSMC3,TNRC6B,USP7,MTA2,CHD3,PSMB6,MOV10,CHD4,ATN1,RCOR1,PSMD8,MTA3,HDAC7,PSMD3,PSMB10,RPTOR,LAMTOR2,CSNK2A2,PSME3,CBX4,TP53,PSMA1,UBC,AKT2,GATAD2A,MAF1,PSMA7,PSMD11,PSME4,LAMTOR3,PSMD4,RRAGD,MLST8,LAMTOR4,SCMH1,HDAC2,WWP2,PSMB1,MAPK3,PSMB5,PHC3	c2_curated.Canonical.Pathways
GOBP_PLATELET_ACTIVATION	0.00213664	0.0699314	0.431708	0.357123	1.71522	88	AXL,THBD,LYN,PTPN6,ACTB,DGKE,PDGFA,F11R,DGKG,SH2B3,PRKCD,GNAS,EMILIN1,METAP1,CSRP1,DGKH,STXBP1,DGKQ,DGKZ,PDGFRA,P2RX1,GNA13,SRF,MYH9,PRKCA,F2R,GP1BB,APOE,SYK,IL6ST,FUNDC2,TEC,TXK,CD9,MYL12A,WNT3A,SERPINE2,VWF	c5_GO.Biological.Process	0.24466	0.66768	0.120433	0.205861	1.1308	90	AXL,BLOC1S3,PTPN6,ALOX12,MERTK,ENTPD2,F11R,DGKE,GP1BB,ACTB,FERMT3,VAV1,DGKZ,GNAS,FCER1G,TYRO3,PRKCD,FUNDC2,MAPK14,METAP1	c5_GO.Biological.Process
JNK cascade ( CD4 T cell receptor signaling ); datasource: inoh;	0.00214387	0.143351	0.431708	0.695583	1.90741	10	FOSL2,FOSB,MAPK10,MAPK8,MAPK9,JUN,FOS	PathwayCommons11	0.855102	0.970544	0.0537873	-0.237908	-0.683501	10	FOSL2,FOSL1,JUN,MAP2K1,MAPK8,MAPK10	PathwayCommons11
EMT	0.00214514	0.0148673	0.431708	0.368986	1.6956	74	EGFR,SP1,GLI1,BMP4,LCN2,EGR1,IGF1R,HMGA2,MET,SMAD3,TGFB1,MCAM,STK11,RELA,MYC,KRAS,ZEB1,JUN,TP53,IL1B,L1CAM,MUC1,MAPK3,SOX2,SMAD2,NOTCH1	NanoString_Genes	0.792	0.850667	0.0564118	-0.152859	-0.812329	71	EGFR,ID1,IGF1R,LEF1,EZH2,ITGB1,WNT5A,PIK3CA,PTGS2,HMGA2,SMAD2	NanoString_Genes
Transport of the SLBP Dependant Mature mRNA; datasource: reactome;	0.00218856	0.143351	0.431708	-0.454436	-1.86082	34	NUP54,NUP155,NUP210,SEH1L,NUP35,NUP43,NUP98,POM121C,NCBP2,ALYREF,NUP58,SLBP,NUP133,NUP214,RAE1,TPR,EIF4E,NDC1,RANBP2,NUP37,NCBP1,NUP107	PathwayCommons11	0.0139468	0.564269	0.38073	-0.368804	-1.61889	34	NUP155,EIF4E,SEH1L,NUP35,NUP37,NUP210,NDC1,NUP54,TPR,NUP133,NUP153,SLBP,NUP88,RAE1,NUP160,NXF1,ALYREF,NUP188,NUP62,NUP214,NCBP2,NUP205,NCBP1,NUP58	PathwayCommons11
GOBP_REGULATION_OF_EPITHELIAL_CELL_APOPTOTIC_PROCESS	0.00219584	0.0715619	0.431708	0.379822	1.76206	76	NFE2L2,CDKN1B,IL11,IGF1R,MIR125A,BTC,TGFB1,STK4,MIR15A,MIR101-1,ABL1,CFLAR,BAX,ZFP36L1,TIA1,CAPN10,MIR375,MDK,MIR24-1,ANO6,CAST,THBS1,WNT11,ZFP36,PDPK1,CARM1,TCF7L2,MIR126,PRKCI	c5_GO.Biological.Process	0.194332	0.627401	0.140406	0.223389	1.1744	77	ZFP36,GSN,PPARA,GAS6,IL11,BAX,TGFB1,SRSF6,MIR15A,ABL1,MDK,FGF21,MIR125A,KRIT1,WNT11,ADAR,PIAS4,NDNF,GATA2,BRAF,NFE2L2,NKX2-5,MIR126,MIR590,HMOX1	c5_GO.Biological.Process
GOBP_ACTOMYOSIN_STRUCTURE_ORGANIZATION	0.00222057	0.0718472	0.431708	0.304314	1.60776	149	MYO18A,PLEC,FRMD3,TNNT2,SORBS3,CAPN3,KRT8,MET,NF2,SMAD3,F11R,TESK1,MKKS,EPB41L1,TCAP,CLASP1,ABL1,CFLAR,SLC9A1,CSRP1,BAG4,PXN,FHDC1,PRKAR1A,RACGAP1,EPB41L4B,ITGB5,ANKRD23,CNN2,RAPGEF3,CDC42BPB,PDLIM1,CFL2,ECT2,FHOD1,RHOC,PDGFRA,SRF,ARAP1,TTC8,KRT19,MYH9,PFN2,TPM1,NRP1,TACSTD2,INPP5K,WNT11,LPAR1,PFN1,S1PR1,TGFBR1,CDC42,NEBL,ALMS1,AKAP13	c5_GO.Biological.Process	0.00813932	0.182363	0.38073	0.24578	1.50659	150	CDC42BPG,MIR149,FHOD1,OBSCN,CDC42BPA,F11R,ELN,KRT19,PFN1,ABL1,PIK3R2,CNN2,KRT8,SIX4,AKAP13,MKKS,SORBS3,PPM1F,CFL2,ANKRD23,WAS,RAPGEF3,ARAP1,PFN2,CUL3,CDC42,LDB3,WNT11,CD47,WNT4,ARHGEF18,TMOD4,ADPRHL1,TCAP,KCTD13,RHOC,TSC1,TNNT2,RHPN1,BRAF,CDC42BPB,PXN,NKX2-5,RAC1,S1PR1,ITGB5,BBS4,MYO18A,CLASP2,SLC9A1,FRMD3,TGFB3,MTOR,IQGAP2,INPP5K,CFLAR	c5_GO.Biological.Process
GOBP_EMBRYONIC_ORGAN_MORPHOGENESIS	0.00222344	0.0718472	0.431708	0.275782	1.53288	217	HOXA1,ID2,PTK7,GLI1,EFNA1,BMP4,HOXB6,HOXB7,HOXB8,HOXB9,TFAP2A,HOXA9,HOXA11,HOXA3,HOXA7,SMAD3,HOXA4,HOXA5,HOXA2,MKKS,CITED2,TCAP,IFT140,FZD2,SATB2,FOXE1,ALDH1A3,SOX9,GRHL3,DVL1,TBX2,GRHL2,OSR2,HOXB3,HOXB5,HOXC9,HOXC4,NDST1,DYNC2I1,TBX6,TPRN,MSX1,ZEB1,HOXC11,HOXB4,SEC24B,RUNX2,RARG,PDGFRA,SRF,NOG,HIPK2,WDPCP,FGFR2,MYO6,MAPK3,WHRN,TRIOBP,WNT11,ENG,PLS1,RDH10,TGFBR1,SMAD2,NOTCH1,DLX6,MIB1,NIPBL	c5_GO.Biological.Process	9.64477e-05	0.0123528	0.538434	0.274309	1.7961	233	DVL2,PTK7,CLUAP1,TPRN,TFAP2A,HOXB6,HOXB7,HOXB8,HOXB9,PAX2,FOXC2,NAGLU,HOXA3,HOXA5,HOXA4,HOXA7,TBX6,NOTCH1,SOX18,HOXD3,HOXD4,MFAP2,RARB,HOXC11,FOXE1,POU4F3,HOXA1,ALDH1A3,RARG,SIX4,MKKS,GRHL2,TBX2,RDH10,EFNA1,FZD2,OVOL2,HOXC9,KDM2B,BMP4,SLC39A1,LRIG1,TRIOBP,HOXC4,TBX1,ZEB1,HOXA9,HOXA11,SETDB2,MED12,WNT11,NKX3-2,SMO,EPHA2,TGFBR2,HOXD10,FOXF2,FUZ,DLG1,SCRIB,GATA2,TCAP,HOXB3,HOXB4,HOXB5,MYO7A,MEGF8,SE…	c5_GO.Biological.Process
Leukemia	0.00223491	0.0148673	0.431708	0.366482	1.69173	75	BAD,MECOM,PIK3CD,CDKN1B,PML,SMAD3,CSF2,TGFB1,SOS2,ABL1,RUNX1,NRAS,RELA,IKBKB,MYC,NFKBIA,KRAS,MDM2,SHC1,BAX,TP53,CCND1,AKT2,TCF7,MAPK3,PIM1,PIK3R3,HDAC2	NanoString_Genes	0.128458	0.451551	0.173748	0.234854	1.24102	78	CCND1,BAD,SHC1,RPS6KB1,NRAS,BAX,TGFB1,MYC,ABL1,PIK3R2,DDB2,TP53,EIF4EBP1,AKT2,RELA,E2F1,PTPN11,STAT5B,TGFBR2,RAF1,HDAC2,BRAF,MAPK3,CCNA1,CEBPA,TGFB3,MTOR,SHC2,RB1,PIK3CD	NanoString_Genes
GOBP_C21_STEROID_HORMONE_METABOLIC_PROCESS	0.00224918	0.0723725	0.431708	0.590843	1.9602	19	ADM,EGR1,CYP46A1,BMP6,STARD3,DKK3,LHB,DGKQ,CACNA1H	c5_GO.Biological.Process	0.917969	0.972244	0.048506	-0.175041	-0.629258	18	AKR1D1,AKR1B1,ADM,DGKQ,REST,DKK3	c5_GO.Biological.Process
GOBP_MULTICELLULAR_ORGANISM_REPRODUCTION	0.00226911	0.0727069	0.431708	0.226185	1.40364	584	CYP27B1,AXL,TLE6,UBR2,NRIP1,CTDNEP1,SEPTIN7,SBF1,ACSL4,SGPL1,GMCL1,C2CD6,GLI1,ERCC1,BMP4,EGR1,IGF1R,NPR2,CYP1B1,HOXA9,HOXA10,HOXA11,BCL6,SKIL,PIWIL4,HAS2,SPACA6,H2AX,BMPR1B,SLC9A8,SPESP1,NOX5,SPIN1,ACOX1,SPATA46,TESK1,MKKS,BRIP1,ORC4,VDR,RARA,IMMP2L,CITED2,CYP26B1,ETV5,PPP1R1B,STK11,SPAG4,PAQR7,TP63,SHB,SPIN3,CATSPERZ,YTHDF2,ATP2B4,TTK,NR3C1,SOX9,QKI,THRB,SNRPA1,KIF18A,PYGO2,IFT25,TPPP3,CDK16,B4G…	c5_GO.Biological.Process	3.99655e-05	0.00790611	0.557332	0.219617	1.60495	592	RBX1,AXL,SIX5,NR3C1,TDRKH,NR2C2,DPCD,ZMYND15,PAFAH1B1,OVOL1,SBF1,INHBA,NR6A1,ACOX1,MKRN2,PRKAG1,KMT2D,PYGO2,CEP131,JAG2,DDX3X,SPATA2,ADNP,CTDNEP1,DAZAP1,TMEM203,BMPR1B,CALR3,RPS6KB1,CFAP97,LGR4,CCDC34,NPR2,MERTK,NECTIN2,BAX,ATN1,ZNF296,SOHLH1,MMP2,SNRPA1,ELL3,NOTCH1,BRDT,STC2,SEPTIN2,ZGLP1,PTCH1,PAQR7,TPPP3,ADAMTS2,LIF,EPOR,A2M,H2AX,ADCY10,ANG,IFT81,BMAL1,UBE2Q1,HEXB,BSG,CSNK2A2,PTGDS,ASH1L,STAU2…	c5_GO.Biological.Process
GOBP_POSITIVE_REGULATION_OF_CELL_DEVELOPMENT	0.00228077	0.0727748	0.431708	0.257198	1.49277	316	BAD,AXL,METRN,SMARCD2,PLXNB2,LYN,SRRT,ID2,SMAD7,CUL7,BMP4,PRKCH,AP3D1,HAPLN4,ACTB,CUX1,HOXA11,BCL6,ISLR2,SKIL,CLCF1,SOX12,CAPRIN2,TGFB1,F11R,RARA,RND2,ETV5,STK11,SHB,RHOH,TIAM2,ZNF488,RUNX1,RELA,CD27,KRAS,ARID1B,NFKBIZ,ARID1A,PPP3CA,KITLG,SOX13,SPI1,NCKAP1L,FOXP3,IL4I1,PRKCZ,PLXNB3,CSF1,ZBTB7B,ADD1,ZFP36L1,RPTOR,TNFSF4,KAT5,IL1B,FOS,SMARCC1,EPHA4,GJC2,ARID2,EIF4G2,BMPR2,CASP8,L1CAM,MDK,ADCY10,GSX…	c5_GO.Biological.Process	0.0265177	0.29392	0.352488	0.19753	1.35428	320	AXL,CAPRIN1,CUL7,PRMT5,PAFAH1B1,ACIN1,METRN,BAD,TBC1D24,SMAD7,ADNP,ZBTB7B,HCLS1,CLCN2,GAS6,HAX1,ELL3,MAG,TGFB1,F11R,TNFSF9,NOTCH1,CD4,IST1,ACTB,RPTOR,LIF,SPEN,PLXNB2,AP3D1,ADCY10,EPHA4,EIF4G2,STAU2,PLXNB1,XBP1,MDK,NCKAP1L,RASGRP1,BMP4,SMARCE1,HAP1,ARMCX5-GPRASP2,GPRASP3,NEDD9,RELA,TYROBP,NFKBID,GJC2,PLXNC1,HOXA11,FOS,SS18L1,FZD4,PLXNA2,AMBRA1,STK11,CX3CL1,SMO,DMRTA2,NCAN,SOCS1,XRCC6,STAT5B,MECP2,…	c5_GO.Biological.Process
WP_MAPK_SIGNALING_PATHWAY	0.00229992	0.101197	0.431708	0.289243	1.58678	191	MAP4K2,EGFR,TNFRSF1A,CACNB3,RAC3,MAPK10,PDGFA,TAOK2,TGFB1,STK4,SOS2,CACNA1D,RPS6KA3,FGF5,PRKCD,MAPK8,CACNB4,NRAS,RELA,IKBKB,MYC,KRAS,MAPK9,IL1R1,PPP3CA,MAPK11,MAPK12,JUN,MAP4K4,TP53,FGF17,IL1B,FOS,MKNK1,PPP5D1P,CACNA1H,PPP5C,AKT2,MAP3K20,SRF,RPS6KA4,NTF4,ATF4,PRKCG,FGFR2,NTRK1,NFATC1,MAPK3,PRKCA,MAP3K11,FGF2,MAPK13,HSPA8,STK3,RRAS,TGFBR1,PLA2G4B,CDC42,RRAS2,BDNF,RAF1,JUND,MAP3K14,PLA2G4E,IL1A,TAO…	c2_curated.Canonical.Pathways	0.000614523	0.0247313	0.477271	0.268592	1.67885	193	PLA2G4C,MAP2K7,RELB,MAP3K11,MAPKAPK5,PLA2G4D,ELK4,GNG12,NRAS,NFATC3,MKNK2,TGFB1,PTPN7,JUND,CACNA1D,MYC,RASGRP2,MAP4K2,RPS6KA4,DUSP1,MAPK11,MAPK12,NTF3,NFKB2,CASP3,FGFR4,TP53,FGF21,RASGRP4,RASGRP1,AKT2,NTF4,PPP5C,RRAS,NF1,RELA,FOS,PRKCD,RRAS2,CDC42,CACNB1,LAMTOR3,MAPK9,HSPA8,TAOK1,MAPK14,TGFBR2,RAF1,CACNG8,CACNG6,DUSP4,MAPK8IP1,FGF2,BRAF,FGF19,NTRK1,MAPK3,RAC1,CACNB4,FGF22,FGFR2,PDGFA,MAP2K4,TNFRS…	c2_curated.Canonical.Pathways
GOBP_POSITIVE_REGULATION_OF_LOCOMOTION	0.00230034	0.0730933	0.431708	0.239767	1.44283	417	TNFRSF18,RIN2,CLDN7,ATP5F1B,EGFR,PIK3CD,MAZ,LYN,TRIP6,NFE2L2,SP1,SEMA4B,BMP4,WNT5B,MYLK,IGF1R,NSMF,CYP1B1,SCARB1,MET,PDGFA,SEMA3B,FUT4,HAS2,MIRLET7F1,SMAD3,FUT7,CSF2,TGFB1,MIR151A,PTK2,MCAM,SPAG9,STK4,DAB2IP,MIR101-1,PDCD6,CLASP1,ZNF268,P2RX4,C5AR1,ABL1,MIR29A,MIR29B1,SOX9,MIR26A1,ZNF609,CORO1A,RACK1,BAG4,VEGFB,MDM2,CD151,IL1R1,SOD2,PPP3CA,KITLG,GRB7,KIF20B,SPI1,FOXP1,NCKAP1L,RAB25,SEMA3A,SPHK1,C…	c5_GO.Biological.Process	0.168096	0.594582	0.138805	0.159143	1.12198	422	PHPT1,CXCL16,FAM89B,STX3,TBC1D24,CLDN7,RPS6KB1,ZNF580,GAS6,FUT7,SOD2,FOXC2,MMP2,AKIRIN1,TGFB1,CAV1,CCAR1,HDAC7,NOTCH1,PDGFC,MCAM,PRKD2,PRKCE,RAB25,MIR10B,WNK1,TMSB15B,ZNF268,EPHA4,VEGFB,FERMT3,PFN1,ABL1,WNT5B,ARHGEF2,ATP5F1A,SWAP70,XBP1,NTF3,MDK,ARHGAP5,FUT1,NCKAP1L,PPM1F,GNAI2,MAZ,SEMA4C,BMP4,AKT2,TRIP6,C1QBP,MADCAM1,IQSEC1,NEDD9,GRB7,PGF,JCAD,RRAS,DAB2IP,ZNF703,FZD4,RRAS2,ITGA2B,CDC42,CX3CL1,SM…	c5_GO.Biological.Process
GOBP_RESPONSE_TO_LIPID	0.00231195	0.0731573	0.431708	0.221219	1.37267	601	CYP27B1,BAD,KCNK4,AXL,SCNN1A,ADM,CAPN2,NRIP1,FOSL2,EGFR,THBD,CACTIN,LYN,SPON2,PTK7,ZFP36L2,TFAP4,FOSB,WNT5B,CDKN1B,DKK1,UFM1,IGF1R,NR1D1,CPT1A,CYP1B1,SCARB1,CARD9,HOXA9,HOXA10,HOXA11,ABCA2,CSF2,HOXA2,DDX5,TGFB1,WDR83,VDR,RARA,SRR,DAB2IP,CYP26B1,PMEPA1,BMP6,RPS6KA3,HNRNPA0,STK11,PTGES3,LOXL1,PAQR7,TP63,CEBPB,BRCA1,ESRRA,ABL1,NR3C1,SOX9,MAPK8,PAPPA,CFLAR,ZBTB7A,KIF18A,SOCS2,TBX2,RELA,NEDD4,FFAR1,SR…	c5_GO.Biological.Process	0.148515	0.579251	0.145516	0.152179	1.11312	604	MAP2K7,AXL,NR3C1,ZBTB7A,IRF3,RUVBL2,PKN1,CD68,PTK7,OVCA2,GSK3A,INHBA,UBE2L3,KMT2D,BAD,KCNK4,TRIM41,ADCY3,ZFP36,CARD9,CEBPB,RPS6KB1,BRCA1,PAX2,OGG1,PPARA,SIGIRR,SOD2,SPON2,ABCA3,ABCG1,NAGLU,HTRA2,MMP2,SPHK2,ABCA1,TGFB1,CAV1,VPS18,NOTCH1,CNP,LANCL2,STC2,PTCH1,PAQR7,WDR83,WNT7B,FOSB,PRKCE,CHMP5,A2M,NOS2,BMAL1,UBR5,NR1H3,ABL1,MIR6869,PTGDS,WNT5B,TPCN2,ATP5F1A,CITED1,RARG,XBP1,NFKB2,BCL2L11,SLC39A9,CA…	c5_GO.Biological.Process
GOBP_REGULATION_OF_COLLAGEN_FIBRIL_ORGANIZATION	0.00233228	0.0732201	0.431708	0.807103	1.84667	6	EFEMP2,MIR29B1,EMILIN1	c5_GO.Biological.Process	0.275154	0.691144	0.116234	0.449804	1.15621	7	MIR29B1,CHADL,EFEMP2,RB1,EMILIN1	c5_GO.Biological.Process
GOBP_NEGATIVE_REGULATION_OF_CELLULAR_RESPONSE_TO_HYPOXIA	0.00233313	0.0732201	0.431708	0.735802	1.9122	9	NOL3,NFE2L2,DDAH1,ENO1,EPHA4,TMBIM6	c5_GO.Biological.Process	0.0894309	0.473264	0.213928	0.501137	1.41376	9	TMBIM6,EPHA4,NFE2L2,DDAH1,VHL,NOL3,PINK1	c5_GO.Biological.Process
amb2 Integrin signaling; datasource: pid;	0.00233893	0.149796	0.431708	-0.561983	-1.92236	18	TLN1,LRP1,HMGB1,RAP1B,RAP1A,ROCK1,SELP,PLAU,PLAUR,ITGAM,MST1,NFKB1	PathwayCommons11	0.159363	0.653265	0.155242	0.354482	1.26376	18	MMP2,LRP1,ITGB2,MST1R,MST1,PLAUR	PathwayCommons11
GOBP_UROGENITAL_SYSTEM_DEVELOPMENT	0.00235002	0.0734476	0.431708	0.417081	1.80687	51	GLI1,BMP4,CDKN1B,HOXA9,HOXA10,HOXA11,CRIP1,RARA,FOXB1,STK11,TP63,SOX9,OSR2,SMARCC1,RARG,EPHB3,NOG,FGFR2,PTCH1,WNT11,NOTCH1,TNC,MMP2,FOXA1	c5_GO.Biological.Process	0.082495	0.460175	0.222056	0.282053	1.35141	50	PAX2,MMP2,NOTCH1,PTCH1,RARG,AMH,EPHB3,FOXA1,BMP4,WDR77,HOXA9,HOXA10,HOXA11,STK11,WNT11,FOXB1,GATA2,BMP7,FRS2,FGFR2	c5_GO.Biological.Process
WP_HAIR_FOLLICLE_DEVELOPMENT_CYTODIFFERENTIATION_PART_3_OF_3	0.00235798	0.102559	0.431708	0.40457	1.76679	55	EGFR,FOSB,BMP4,DKK1,CUX1,BMP6,FOXE1,TP63,NR3C1,SOX9,DSC2,KITLG,MSX1,JUN,SOSTDC1,DKK3,FOS,FOXN1,KRT15,KRT19,NFATC1,SOX2,NOTCH1	c2_curated.Canonical.Pathways	0.26087	0.676725	0.11725	0.226376	1.127	58	NR3C1,KRT15,KRT19,NOTCH1,FZD1,FOSB,FOXE1,SOX2,BMP4,LRIG1,HOXC12,FOS,SMAD1,DSC2,ADAM17,CUX1,TCF3,FOXQ1	c2_curated.Canonical.Pathways
GOBP_CILIARY_BODY_MORPHOGENESIS	0.00236719	0.0736825	0.431708	0.945022	1.68662	3	TSKU,JAG1	c5_GO.Biological.Process	0.789899	0.932907	0.057006	-0.363178	-0.73756	4	JAG1	c5_GO.Biological.Process
GOBP_RESPONSE_TO_PEPTIDOGLYCAN	0.00239414	0.0742183	0.431708	0.696021	1.89063	10	INAVA,CARD9,C5AR1,RELA	c5_GO.Biological.Process	0.250513	0.674547	0.122679	0.457946	1.17714	7	CARD9,INAVA,RELA	c5_GO.Biological.Process
BCR.Signaling	0.00241376	0.0148673	0.431708	0.383637	1.68087	63	PIK3CD,LYN,RAC3,SOS2,PSMB7,UBC,NRAS,RELA,IKBKB,CD22,NFATC2,NFKBIA,KRAS,IFITM1,PPP3CA,JUN,PSMB2,FOS,AKT2,NFATC1,MAPK3,PIK3R3,SYK,PSMB10,RAF1	NanoString_Genes	0.480237	0.763004	0.0806388	0.197205	0.983714	61	NRAS,NFATC3,PSMB10,PIK3R2,CARD11,UBC,RASGRP1,AKT2,RELA,FOS,NFKBIE,RAF1,CD79A,SKP1,MAPK3,RAC1,PSMB5,BTK,PIK3CD,PPP3CB,MAP2K2,CUL1,NFATC2,CD81,PPP3CC,CD22,IKBKB,PPP3R1	NanoString_Genes
WP_CALCIUM_REGULATION_IN_CARDIAC_CELLS	0.00242773	0.104392	0.431708	0.334073	1.67122	106	PLCB3,GNG8,CACNB3,PRKCH,RGS20,CACNA1D,PRKCD,GNAS,YWHAZ,GRK6,ATP1B3,SFN,ADCY9,RGS6,RGS19,ITPR3,RGS2,ATP1B1,PRKCZ,GNB1,PRKAR1A,RGS9,GJC2,CALM3,ATP2A3,GRK4,ADCY7,GNB5,PRKCG,PRKCA,YWHAG,PRKCE,GNG7,ITPR2,ADRA1D,YWHAQ,KCNJ5,FKBP1A,GNB2,GNG3,ORAI1	c2_curated.Canonical.Pathways	0.312377	0.719351	0.105125	0.1889	1.07723	111	GNG7,GNG12,PLCB3,ADCY3,PRKAR1B,CACNA1D,YWHAZ,ATP2A2,PRKCE,FKBP1A,ORAI1,GNB2,ADCY5,GNAS,GNG3,CAMK2G,GNAI2,ITPR2,ADCY7,GJC2,PRKCD,CHRM1,ADCY6,CACNB1,GJB2	c2_curated.Canonical.Pathways
GOBP_POSITIVE_REGULATION_OF_TOR_SIGNALING	0.00243281	0.0751119	0.431708	0.407131	1.77713	55	GPR137,LAMTOR1,SIK3,WDR24,FLCN,RICTOR,NCKAP1L,LAMTOR2,OTUB1,WDR59,RPTOR,SRMS,PIM1,USP9X,SYK,RNF167,RHEB,TBK1,MLST8,EP300,CTNS,USP32,GOLPH3,PIH1D1,CLEC16A,STAMBPL1,LARS1	c5_GO.Biological.Process	0.000337781	0.0275926	0.498493	0.395057	1.95693	58	RBX1,TBK1,GPR137,RPS6KB1,CLEC16A,GAS6,CSNK1A1,RNF167,RPTOR,LAMTOR2,NCKAP1L,FNIP1,USP9X,CUL3,FLCN,LAMTOR3,OTUB1,RRAGD,SRMS,MLST8,EP300,LAMTOR4	c5_GO.Biological.Process
Estrogen.Signaling	0.00243517	0.0148673	0.431708	0.382807	1.7128	67	EGFR,PIK3CD,SP1,KRT18,STAG2,H2AX,SOS2,CXXC5,PRKCD,GNAS,RUNX1,NRAS,MYC,KRAS,SHC1,JUN,CCND1,FOS,RAD21,KRT17,AKT2,KRT19,MAPK3,SMC1A,PIK3R3,HSP90B1,RAF1,EP300,FOXA1,PIK3R2,CALML3,CREB1,CREB3L4,HSPA6,SHC3,HSPA2,GATA3,ESR2	NanoString_Genes	0.258317	0.625973	0.11725	0.220849	1.13719	68	CCND1,SHC1,NRAS,KRT19,CREB5,MYC,H2AX,PIK3R2,KRT18,GNAS,CREBBP,FOXA1,AKT2,FOS,PRKCD,CXXC5,RAF1,EP300	NanoString_Genes
GOBP_REGULATION_OF_EXTRACELLULAR_MATRIX_ASSEMBLY	0.00245125	0.0753759	0.431708	0.593048	1.93688	18	PHLDB1,HAS2,SMAD3,TGFB1,CLASP1,MIR29B1,SOX9,EMILIN1,MIR27B,MIR98,TGFBR1,NOTCH1	c5_GO.Biological.Process	0.637681	0.873477	0.0684715	0.247522	0.851319	17	TGFB1,NOTCH1,PHLDB1,MIR9-1,MIR29B1,CLASP2,EMILIN1,DAG1	c5_GO.Biological.Process
PID_ERBB1_DOWNSTREAM_PATHWAY	0.00247001	0.105017	0.431708	0.343684	1.68672	97	BAD,CAPN2,MAPKAP1,EGFR,PIK3CD,EGR1,EPS8,RPS6KA3,PRKCD,MAPK8,YWHAZ,RIN1,NRAS,SLC9A1,NCKAP1,KRAS,SFN,MAPK9,RICTOR,PRKCZ,RAB5A,JUN,MYL11,FOS,ARPC2,PPP5C,SRF,RPS6KA4,WASL,MAPK3,PRKCA,YWHAG,PIK3R3,ZFP36,YWHAQ,PDPK1,ARPC4,ACTR3,CDC42,MLST8,RAF1	c2_curated.Canonical.Pathways	0.450867	0.804954	0.0826646	-0.17904	-1.01806	99	EGFR,PIK3R3,RPS6,PLD1,STAT1,PPP2R2A,BAIAP2,YWHAG,SH2D2A,CAPN2,SOS1,EPS8,PIK3CA,DIAPH3,SFN,ABI1,DUSP6,PRKCA,WASF2,ARPC4,ELK1,JUN,PIK3CB,GRB2	c2_curated.Canonical.Pathways
GOBP_REGULATION_OF_NEURON_APOPTOTIC_PROCESS	0.00247053	0.0756636	0.431708	0.293226	1.5705	169	AXL,DKK1,NR4A2,EGR1,TFAP2A,AKT1S1,NSMF,SET,CLCF1,ERBB3,FOXB1,CLN3,CEBPB,UBE2M,SIGMAR1,ABL1,NR3C1,PYCR1,MCL1,CORO1A,VPS54,KRAS,CPEB4,SOD2,STXBP1,BAX,TP53,CCND1,TRAF7,RAD21,AGAP2,CASP8,MDK,ADCY10,GCLC,ITGA1,MIR200A,NTF4,ATF4,HIPK2,PRKCG,NRP1,RIPK1,NTRK1,EGLN3,F2R,MAP3K11,APOE,PPT1,MIR98,SLC25A27,EGLN2,IL6ST,MIR15B,BDNF,PRKCI,DNAJC5,PCDHGC3,PCDHGC5,PCDHGC4,NF1,MAP2K7,MAP3K12,NAE1,NONO,ARMCX5-GPRASP2…	c5_GO.Biological.Process	2.33071e-05	0.00613297	0.57561	0.308449	1.94077	180	MAP2K7,MCL1,AXL,THAP11,CCND1,NR3C1,MAP3K11,ADNP,CEBPB,MIR195,TFAP2A,CLN3,BAX,SOD2,HTRA2,MAG,GCLC,FZD1,BACE1,ADCY10,ATP13A2,ABL1,CITED1,NTF3,MDK,BCL2L11,SIX4,CASP3,TP53,SET,KDM2B,TYRO3,NTF4,ARMCX5-GPRASP2,GPRASP3,NF1,NONO,TRAF7,AMBRA1,CX3CL1,PITX3,UCP2,FOXB1,MECP2,ADORA2A,RETREG1,VPS54,AKT1S1,DNAJC5,NDNF,NRBP2,FZD9,UCN,CDC34,BRAF,NTRK1,ADAM8,NPPC,CLCF1,CASP9,HIF1A,AARS1,FOXQ1,SARM1,MIR200A,MAP2K4,…	c5_GO.Biological.Process
REACTOME_OLFACTORY_SIGNALING_PATHWAY	0.00252392	0.106117	0.431708	-0.520096	-1.95791	24	LDB1,EBF1,OR52N1,OR51B2,OR51B4,OR52E8,OR52E6,OR52N5,OR52H1,OR51I1,OR51B5,CNGA4	c2_curated.Canonical.Pathways	0.720792	0.900389	0.0603786	0.220842	0.818462	21	ADCY3,LDB1,OR1F1,GNAL	c2_curated.Canonical.Pathways
GOBP_SENSORY_PERCEPTION_OF_SMELL	0.00253207	0.0770938	0.431708	-0.439377	-1.80383	35	OR2B8P,SYT10,NAV2,OR52N1,OR51B2,OR51B4,OR52E8,OR52E6,OR52N5,OR52H1,OR51I1,OR51B5,CNGA4,OBP2A,CFAP69,ADCY3,GPR148	c5_GO.Biological.Process	0.383673	0.759183	0.0949752	0.245927	1.04848	32	ADCY3,OR1F2P,OR1F1,MKKS,BBS1,FZD2,PDE4A,CFAP69,UBR3	c5_GO.Biological.Process
GOBP_REPRODUCTIVE_SYSTEM_DEVELOPMENT	0.0025393	0.0770938	0.431708	0.275285	1.52684	208	AXL,NRIP1,RHOBTB3,SGPL1,GLI1,ERCC1,BMP4,CDKN1B,NPR2,RNF38,CYP1B1,HOXA9,HOXA10,HOXA11,CRIP1,BMPR1B,MKKS,BRIP1,RARA,IMMP2L,CITED2,BMP6,STK11,TP63,CEBPB,SOX9,KIF18A,TFAP2C,CSDE1,YBX3,KDM5B,NKX2-1,ATN1,CTNNA1,KITLG,BAX,BAK1,UBE2Q1,PLEKHA5,ANG,ARID5B,PPP1R9B,SMARCC1,LHB,RARG,H3-3B,ARID4B,PDGFRA,NOG,EIF2B4,ADGRG1,FGFR2,PTCH1,NTRK1,NR2F2,LGR4,ACVR2A,RDH10,TGFBR1,TIPARP,NOTCH1,TNC,MMP2,NIPBL,ARID4A,IL1A,…	c5_GO.Biological.Process	0.00414933	0.12803	0.407018	0.236157	1.52048	213	AXL,INHBA,SPATA2,CEBPB,BMPR1B,CSDE1,LGR4,NPR2,MERTK,CTNNA1,ARID5B,BAX,ATN1,MMP2,NOTCH1,PTCH1,A2M,ANG,UBE2Q1,ASH1L,SYCP2,RARG,BCL2L11,SIX4,EIF2B5,CASP3,WNT2B,MKKS,AMH,DHH,RDH10,ADAM15,ERCC1,FOXA1,TYRO3,BMP4,WDR77,FNDC3A,ZFX,ADGRG1,HOXA9,HOXA10,HOXA11,FZD4,STK11,PTPN11,FOXC1,WNT4,STAT5B,FOXF2,DLG1,RRM1,KDM5B,SOX15,BRIP1,PLEKHA5,H3-3B,NTRK1,BMP7,NPPC,NCOA1,DMC1,FRS2,EIF2B4,SDC1,BIK,FGFR2,SAFB2	c5_GO.Biological.Process
GOBP_V_D_J_RECOMBINATION	0.00254755	0.0770938	0.431708	-0.581192	-1.99984	17	DCLRE1C,HMGB1,ATM,DCAF1,RAG2,RAG1,XRCC4,CYREN,LIG3,YY1	c5_GO.Biological.Process	0.215264	0.641672	0.130106	-0.336675	-1.22661	19	HMGB2,LEF1,XRCC4,DCLRE1C,POLB,PRKDC,HMGB1,RAG2,LIG3,LIG4,ATM,DCAF1,RAG1	c5_GO.Biological.Process
GOBP_REGULATION_OF_RESPONSE_TO_BIOTIC_STIMULUS	0.00259501	0.0782194	0.431708	0.249114	1.46097	343	MMRN2,NT5C2,HEXIM1,TRAFD1,CACTIN,LYN,NFE2L2,PTPN6,FLOT2,ZDHHC5,INAVA,ARG2,NR1D1,NOP53,CARD9,SH2D1A,NLRP1,TGFB1,LACC1,ISG15,DAB2IP,BMP6,RPS6KA3,KLRD1,YTHDF2,SEC14L1,MAPK8,YWHAZ,UBE2K,EMILIN1,RELA,IKBKB,ZDHHC1,NFKBIA,NLRX1,PTPN1,NFKBIZ,NOD1,SPI1,FOXP1,TMEM126A,MAVS,FOXP3,IL4I1,NR1H2,TRIL,EVPL,NECTIN2,ANKRD17,SFPQ,IL1B,SASH1,CASP6,SLC15A3,MIR26B,TRIM41,CASP8,CYBA,PVR,AP1G1,TNIP1,ERAP1,LAG3,N4BP1,ZDH…	c5_GO.Biological.Process	0.233929	0.660907	0.117766	0.158699	1.08858	333	IRF3,SERPINB9,MARK4,RNF26,PTPN6,ISG15,NT5C2,TBK1,MIR149,LACC1,TRIM41,DDX3X,CARD9,RBM14,LGR4,SIGIRR,NECTIN2,HEXIM1,NAGLU,TGFB1,CAV1,CSNK1A1,YWHAZ,ZDHHC1,SFPQ,PRKCE,ZCCHC3,HSPD1,A2M,INAVA,NR1H3,HSP90AA1,VAV1,CDC37,DCST1,SMPDL3B,RASGRP1,CREBBP,MIR26B,TYRO3,CPTP,MED1,DHX33,C1QBP,DAB2IP,NONO,RELA,TYROBP,LRSAM1,CX3CL1,FLOT2,PTPN11,HSPA8,GRAMD4,RIGI,XRCC6,STAT5B,IRAK1,ADAR,BANF1,GIGYF2,OASL,EP300,NPLOC4…	c5_GO.Biological.Process
GOBP_CHROMATIN_REMODELING	0.00261178	0.078415	0.431708	0.230273	1.40251	485	EEF1AKMT3,BCOR,MEN1,ANTKMT,UBR2,SMARCD2,ERCC6L2,BAZ2A,SMARCAD1,MECOM,H1-10,CHD3,MTA3,KDM5A,CHD4,METTL23,PWWP2B,SMCHD1,ACTB,BAZ1B,TASOR,HMGA2,SUPT16H,CHD8,BCL6,SET,BICRAL,KDM2A,H2AX,CFDP1,SETBP1,GRWD1,SETD1B,JADE2,USP3,VCPKMT,HDGFL2,MACROH2A1,CHD9,SATB2,USP21,TP63,ATF7IP,KDM4B,BRCA1,KMT5B,SOX9,KMT2A,ZNF274,ZBTB7A,TFAP2C,PER2,KMT5C,KDM7A,MYC,BAHD1,MTA1,ARID1B,KDM5B,MTA2,NFKBIZ,ARID1A,KAT14,BRPF3,PC…	c5_GO.Biological.Process	0.08	0.453215	0.204295	0.163583	1.17857	518	KDM6B,ZBTB7A,PRMT1,RUVBL2,NFAT5,PKN1,PRMT5,H1-10,USP7,GSK3A,MTA2,CHD3,USP21,UHRF1,ANTKMT,CFDP1,KMT2D,NAA60,CECR2,SIRT7,CHD4,BRCA1,BRPF1,RBM14,KAT14,SART3,ZNF827,TOP1,TET3,MACROH2A1,INO80B,SPHK2,KAT2A,NTMT1,BAZ1B,BAZ2B,NSD1,MTA3,HDAC7,BRDT,KDM4B,L3MBTL1,RNF168,RSF1,HDGFL3,DPF1,DOT1L,MYC,ACTB,SFPQ,TSPYL5,PCGF1,H2AX,BICRAL,CDK2,UBR5,MEN1,RPS6KA4,ASH1L,BICRA,DPF2,UBR2,SETD1B,HDAC11,HDAC10,HDGFL2,HDAC…	c5_GO.Biological.Process
GOBP_POSITIVE_REGULATION_OF_CELL_CELL_ADHESION	0.00263044	0.0784205	0.431708	0.285001	1.5569	191	BAD,SMARCD2,LYN,FSTL3,SMAD7,PTPN6,FLOT2,AP3D1,ACTB,BCL6,FUT4,HAS2,FUT7,SOX12,F11R,DHPS,RARA,CITED2,PIEZO1,JAK1,SHB,RHOH,ABL1,EMILIN1,RUNX1,RELA,CD27,CORO1A,ARID1B,NFKBIZ,ARID1A,PPP3CA,KITLG,SOX13,NCKAP1L,FOXP3,IL4I1,PRKCZ,ZBTB7B,EFNB3,TNFSF4,KAT5,IL1B,SMARCC1,ARID2	c5_GO.Biological.Process	0.346789	0.739572	0.0946646	0.164278	1.05148	199	NFAT5,PTPN6,BAD,SMAD7,ZBTB7B,FUT7,F11R,TNFSF9,CAV1,TNFRSF13C,ITGB2,CD4,DHPS,ACTB,HSPD1,AP3D1,RASAL3,ABL1,CCDC88B,CARD11,XBP1,VAV1,MDK,SOX2,EFNB3,NCKAP1L,RASGRP1,FOXA1,SMARCE1,PIEZO1,RELA,NFKBID,FSTL3,AMBRA1,CX3CL1,FLOT2,PTPN11,CD47,SOCS1,STAT5B,IRAK1,SMARCD2,TGFBR2,ACTL6B,SMARCA2,SLC7A1,MALT1,ADAM8,BMP7,HSPH1,SHB,PRKCZ,KAT5,LGALS9,BTN2A2,IL6ST,PBRM1,PLAUR,CBFB,TFRC	c5_GO.Biological.Process
GOBP_GROWTH	0.00263253	0.0784205	0.431708	0.215665	1.3523	681	TBL1XR1,CYP27B1,PAK6,ADM,MAPKAP1,FOSL2,TSKU,EGFR,PLEC,SGPL1,SMAD7,PTK7,GLI1,PPP1R13L,ERCC1,SEMA4B,BMP4,CAPN3,BTG1,CDKN1B,CDK11B,CLSTN1,NPR2,HOXA11,BCL6,ISLR2,RMI1,SEMA3B,PML,SMAD3,HOXA5,TAOK2,TNS2,BMPR1B,FKBP8,CAPRIN2,ST7L,CDHR2,TGFB1,RTN4R,JADE2,MKKS,MBD5,SPAG9,STK4,LAMTOR1,RARA,CITED2,HDGFL2,RND2,RPS6KA3,ACVR2B,STK11,PRICKLE1,BRCA1,GNAS,ABL1,ULK1,MIR29B1,SOX9,CFLAR,IGFBP4,DVL1,RUNX1,SOCS2,TBX2,…	c5_GO.Biological.Process	0.0517529	0.396078	0.257206	0.162872	1.20455	705	SIPA1,PTK7,CXCL16,PAFAH1B1,GSK3A,INHBA,MYMX,SPRY1,KMT2D,CTC1,ST7L,NME6,PYGO2,SMAD7,DDX3X,ADNP,TLE5,BMPR1B,RPS6KB1,BRCA1,MIR195,AGRN,FKBP8,NAIF1,SLC25A25,CPNE9,PPARA,LAMB2,NPR2,COL27A1,ARID5B,WASF1,ATN1,FOXC2,HTRA2,FLRT1,AKIRIN1,HOXA5,SPHK2,MAG,KAT2A,TGFB1,ACVR2B,NOTCH1,USP47,STC2,SGK2,FKRP,CDKN2AIP,PTCH1,IST1,RPTOR,WNT7B,STK40,LAMTOR2,BCL11A,RASGRP2,ADCY10,LZTS2,RARB,EIF4G2,ABL1,MELTF,POU4F3,SPTB…	c5_GO.Biological.Process
Cytosolic iron-sulfur cluster assembly; datasource: reactome;	0.0026444	0.165678	0.431708	0.644693	1.96322	13	BRIP1,NDOR1,CIAO3,ERCC2,POLD1,NUBP1,NUBP2,RTEL1,MMS19	PathwayCommons11	0.384766	0.841675	0.0922597	0.325861	1.05795	13	NDOR1,CIAO3,ERCC2,BRIP1,CIAO2B,POLD1	PathwayCommons11
REACTOME_SIGNALING_BY_PTK6	0.00264842	0.110128	0.431708	0.414053	1.75794	47	EGFR,CDKN1B,BTC,ERBB3,NR3C1,UBC,NRAS,KRAS,PTPN1,PELP1,PXN,CCND1,SFPQ,PTK6,SRMS,BCAR1,ARHGAP35,ARAP1	c2_curated.Canonical.Pathways	0.324803	0.730222	0.102822	0.227236	1.08648	48	CCND1,NR3C1,NRAS,STAP2,SFPQ,CDK2,UBC,ARAP1,ELMO2,PTK6,SRMS,DOCK1,PXN,RAC1,HIF1A,BCAR1	c2_curated.Canonical.Pathways
GOBP_VESICLE_MEDIATED_CHOLESTEROL_TRANSPORT	0.00266309	0.0789848	0.431708	0.800318	1.83115	6	SYT7,VPS54,VPS51,PIP4K2A	c5_GO.Biological.Process	0.357143	0.746229	0.0992333	0.445394	1.0891	6	VPS51,TPCN2,VPS54	c5_GO.Biological.Process
GOBP_DIACYLGLYCEROL_METABOLIC_PROCESS	0.00267218	0.0789848	0.431708	0.55733	1.90888	21	PLB1,DGKE,DGKG,DGKH,PGS1,APOA2,ANG,DGKQ,PLA2G15,DGKZ,PNPLA2	c5_GO.Biological.Process	0.714859	0.906463	0.0614364	0.214754	0.816479	21	AVIL,DGKE,ANG,DGKZ,PNPLA2	c5_GO.Biological.Process
GOBP_REGULATION_OF_MIRNA_TRANSCRIPTION	0.00269312	0.0792962	0.431708	0.390122	1.72156	59	EGFR,BMP4,EGR1,SMAD3,DDX5,TGFB1,RARA,NR3C1,SOX9,MRTFA,RELA,MYC,SREBF1,SPI1,NGFR,JUN,NR1H2,ZNF512B,TP53,FOS,POU2F1,SRF,KLF5,NFIB,FGF2	c5_GO.Biological.Process	0.0769231	0.447094	0.227987	0.27481	1.36332	59	NR3C1,MRTFB,PPARA,NFATC3,TGFB1,MYC,ZNF512B,TP53,FOXA1,BMP4,RELA,FOS,SMAD1,NGFR,YY1,GATA2,NCOR2,FGF2,SMAD6,HIF1A,GNL3,NR1H2	c5_GO.Biological.Process
KEGG_B_CELL_RECEPTOR_SIGNALING_PATHWAY	0.00272352	0.110897	0.431708	0.400035	1.76325	58	PIK3CD,LYN,PTPN6,RAC3,SOS2,NRAS,RELA,IKBKB,CD22,NFATC2,NFKBIA,KRAS,IFITM1,PPP3CA,JUN,FOS,AKT2,NFAT5,NFATC1,MAPK3,PIK3R3,SYK	c2_curated.Canonical.Pathways	0.141199	0.556774	0.16318	0.255124	1.25655	54	NFAT5,PTPN6,NRAS,NFATC3,PIK3R2,CARD11,VAV1,AKT2,RELA,FOS,NFKBIE,RAF1,CD79A,MALT1,MAPK3,RAC1,BTK,PIK3CD,PPP3CB,MAP2K2,NFATC2,CD81,PPP3CC,CD72,CD22,IKBKB,PPP3R1	c2_curated.Canonical.Pathways
WP_ANGIOTENSIN_II_RECEPTOR_TYPE_1_PATHWAY	0.00272553	0.110897	0.431708	0.542908	1.8605	21	SP1,IL11,SMAD3,TGFB1,RACK1,IL11RA,IL6ST,ACE2,RRAS,TGFBR1,RAF1,JUND	c2_curated.Canonical.Pathways	0.102913	0.500409	0.193813	0.36078	1.36097	22	IL11,TGFB1,JUND,RRAS,PTPN11,TGFBR2,RAF1,F12,HIF1A,IL6ST,RACK1,COL1A1	c2_curated.Canonical.Pathways
GOBP_AMEBOIDAL_TYPE_CELL_MIGRATION	0.00274795	0.0805995	0.431708	0.242119	1.42699	356	MMRN2,RIN2,ATP5F1B,PIK3CD,PLEC,SGPL1,NFE2L2,SP1,EFNA1,MIR200C,SEMA4B,BMP4,MIR196A1,CYP1B1,SCARB1,MET,SEMA3B,HAS2,MIRLET7F1,PML,ZFAND5,TGFB1,PTK2,TESK1,MIR15A,MIR16-1,DAB2IP,MIR101-1,CLN3,PDCD6,CLASP1,P2RX4,ATP2B4,ABL1,MIR29A,SOX9,PLEKHG5,MIR26A1,CORO1A,BAG4,MTA2,PKN2,TNFSF12,MCC,KITLG,FOXP1,LAMTOR2,RAB25,SEMA3A,PXN,PRKD2,MAP4K4,EPB41L4B,SEMA4C,ARID5B,DMTN,PDLIM1,MIR10A,BCAR1,SH3BP1,SASH1,BMPR2,AR…	c5_GO.Biological.Process	0.204263	0.63629	0.126876	0.159538	1.10432	366	PKN1,PAFAH1B1,MIR200C,MTA2,CYGB,MIR149,RFFL,MIR497,MIR196A1,ZNF580,RADIL,AMOTL2,CLN3,ARID5B,FOXC2,TGFB1,HDAC7,NOTCH1,SOX18,PRKD2,ITGB4,MIR15A,MIR16-1,PRKCE,LAMTOR2,RAB25,MIR10B,PLEKHG5,PFN1,ABL1,PRCP,ATP5F1A,TNFSF12,ARHGAP5,EFNA1,FUT1,MIR152,PPM1F,OVOL2,CORO1B,SEMA4C,BMP4,MIR640,C1QBP,IQSEC1,JCAD,RRAS,DAB2IP,NF1,TBX1,PFN2,KRIT1,CDC42,WNT11,PTPN11,SMO,MIR29A,HAS1,LRP5,EPHA2,MAPK14,STAT5A,MECP2,TGF…	c5_GO.Biological.Process
GOBP_ELASTIC_FIBER_ASSEMBLY	0.00276233	0.080711	0.431708	0.799107	1.82838	6	FBLN5,THSD4,EFEMP2,EMILIN1	c5_GO.Biological.Process	0.936735	0.979887	0.0495902	0.24708	0.604175	6	EFEMP2,LOX,EMILIN1	c5_GO.Biological.Process
REACTOME_FOXO_MEDIATED_TRANSCRIPTION	0.00276868	0.111454	0.431708	0.4143	1.79669	53	BTG1,CDKN1B,BCL6,SMAD3,CITED2,STK11,NR3C1,YWHAZ,SREBF1,SFN,FBXO32,SOD2,RBL2,PCBP4,SIRT3,AKT2,YWHAG,HDAC2,YWHAQ,SMAD2,NFYA,EP300,FOXG1,TXNIP,NFYC,ATXN3,CCNG2	c2_curated.Canonical.Pathways	0.443564	0.802105	0.0850427	0.207818	1.00277	51	NR3C1,SOD2,CAV1,YWHAZ,AGRP,RBL2,BCL2L11,CREBBP,AKT2,FBXO32,ATXN3,STK11,EP300,HDAC2,FOXO4	c2_curated.Canonical.Pathways
GOBP_SMOOTH_MUSCLE_TISSUE_DEVELOPMENT	0.00278935	0.0811891	0.431708	0.589517	1.92535	18	FOSL2,BMP4,MYLK,NPR2,EFEMP2,ZFAND5,SOX9,SRF,PTCH1,ENG,TIPARP,NF1,DLG1,SIX1	c5_GO.Biological.Process	0.283644	0.696273	0.114751	0.33177	1.14108	17	NPR2,PTCH1,BMP4,NF1,SMO,DLG1,EFEMP2,PKD2	c5_GO.Biological.Process
Activation of anterior HOX genes in hindbrain development during early embryogenesis; datasource: reactome;	0.00279799	0.166123	0.431708	0.406247	1.77214	54	NCOA6,HOXA1,HOXA3,HOXA4,HOXA2,RARA,HOXB3,HOXC4,JUN,AJUBA,RXRA,KMT2D,NCOA3,POLR2B,HOXB4,MEIS1,RARG,PKNOX1	PathwayCommons11	0.0165152	0.564269	0.352488	0.326215	1.59934	58	KMT2D,HOXA3,HOXA4,HOXD3,HOXD4,POLR2E,RARB,HOXA1,RARG,WDR5,CREBBP,HOXC4,MEIS1,PKNOX1,YY1,EP300,HOXB3,HOXB4,HOXB2,POLR2G,POLR2F,ASH2L	PathwayCommons11
Endocytosis	0.00279918	0.0162352	0.431708	0.45713	1.76491	35	EGFR,ACTB,IGF1R,CBLC,PML,SMAD3,SMAP1,UBC,MDM2,SYT17,PDGFRA,FGFR2,TGFBR1,SMAD2,REPS1,HSPA6,RHOA,HSPA2,PLD1,CD4,IL2RB,ITCH,TFRC	NanoString_Genes	0.0892857	0.431548	0.2114	-0.314737	-1.36886	35	EGFR,PML,PLD1,IGF2R,IGF1R,WIPF1,WNT5A,UBB,SMAD2,RPS27A,ITCH,HSPA2,REPS1,RAB7A,MDM2,TGFBR1	NanoString_Genes
Drosophila Toll-like receptor signaling ( Drosophila Toll-like receptor signaling ); datasource: inoh;	0.00281247	0.166123	0.431708	0.280594	1.54002	195	PAK6,MAP4K2,EGFR,PRKCH,MAPK10,IGF1R,MET,BMPR1B,CDK3,PTK2,RPS6KA3,JAK1,PSMB7,ACVR2B,PRKCD,MAPK8,GRK6,IKBKB,RHBDL1,MAPK9,RPS6KA2,NGFR,PLK3,MAPK11,MAPK12,PRKCZ,PRKAG1,PRKAR1A,APH1B,PSMB2,MAP3K10,PSMD4,MKNK1,CASP6,BMPR2,CASP8,PDGFRA,PSMD13,AKT2,GRK4,CASP10,PRKCG,FGFR2,PSMC2,RIPK1,NTRK1,MAPK3,PRKCA,PRKCE,PSMD9,ACVR1B,MAP3K11,PSMA5,PDPK1,SYK,MAPK13,ACVR2A,TGFBR1,PSMA6,PAK5,CSNK1E,PSMB10,RAF1,PRKCI,MAP3…	PathwayCommons11	0.0103055	0.55283	0.38073	0.227272	1.42851	202	MAP2K7,PSMC3,WEE1,MAP3K11,MAPKAPK5,GSK3A,PSMB6,CDK3,PRKAG1,RPS6KB2,BMPR1B,RPS6KB1,PRKAR1B,PSMD8,ACVR2B,CSNK1A1,PSMD3,PSMB10,PRKCE,CSNK1E,CDK2,MAP4K2,MAPK11,MAPK12,JAK3,CASP3,FGFR4,PSMA1,RPS6KA2,CAMK2G,PAK6,AKT2,BMP1,PRKCD,PSMA7,NCSTN,PSMD11,MAPK9,PSMD4,MAPK14,IRAK1,TGFBR2,NGFR,ADAM10,RAF1,CSNK1G2,GRK6,LTK,BRAF,NTRK1,PSMB1,ADAM17,IKBKE,MAPK3,CASP9,PSMB5,FGFR2,PRKCZ,PRKAB2,GRK4,BTK,MAP2K4,MAP3K5,PS…	PathwayCommons11
GOBP_NEGATIVE_REGULATION_OF_VIRAL_TRANSCRIPTION	0.00282004	0.0817704	0.431708	0.656792	1.9074	13	HEXIM1,TRIM8,UBP1,TRIM11,ZFP36,TRIM13,IFITM3,MID2	c5_GO.Biological.Process	0.144309	0.574151	0.165657	0.426202	1.32834	12	TRIM8,ZFP36,HEXIM1,TRIM14,TRIM13,IFITM3,TRIM21	c5_GO.Biological.Process
JNK cascade ( CD4 T cell receptor signaling (JNK cascade) ); datasource: inoh;	0.00283618	0.166123	0.431708	0.657347	1.93541	12	FOSL2,FOSB,MAPK10,MAPK8,MAPK9,JUN,FOS,MAPK3	PathwayCommons11	0.944554	0.985636	0.04783	0.190166	0.593685	12	FOSB,FOS,MAPK9,MAPK3	PathwayCommons11
GOBP_RESPONSE_TO_OXYGEN_LEVELS	0.00283868	0.0819991	0.431708	0.26732	1.50716	246	BAD,ADM,CAPN2,FOSL2,NOL3,NFE2L2,CDKN1B,NR4A2,EGR1,NOP53,DDAH1,PML,SMAD3,HSPG2,TGFB1,SCFD1,USF1,WDR83,BRIP1,CITED2,CIAO3,CFLAR,MYC,SLC9A1,VEGFB,MDM2,CPEB4,SOD2,PLK3,ERCC2,NDRG1,AJUBA,ADO,ENO1,TP53,ZFP36L1,RPTOR,ANG,PDLIM1,FOS,RWDD3,RAD21,EPHA4,STUB1,CYGB,LIMD1,CCDC115,SRF,THBS1,ATF4,MIEF1,HIPK2,HILPDA,FGFR2,CRYAB,EGLN3,TIGAR,PLEKHN1,PRKCE,TMBIM6,ITPR2,HDAC2,CD24,MALAT1,LPAR1,EGLN2,HSP90B1,CPEB2,SO…	c5_GO.Biological.Process	0.0471618	0.388328	0.321776	0.20402	1.34122	246	TMBIM6,SLC2A1,SLC29A1,CYGB,BAD,ARNT,PPARA,USP19,AGTRAP,SOD2,MMP2,TGFB1,USF1,CAV1,NOTCH1,STC2,WDR83,MYC,RPTOR,LIF,PRKCE,NOS2,ANG,EPHA4,VEGFB,BECN1,SDHD,XRCC1,SCAP,ATP6V0D1,CASP3,CIAO3,SOX2,MIR34A,TP53,ADAM15,NDUFS2,CREBBP,ITPR2,PGF,NF1,NONO,TMEM199,SLC2A8,FOS,ADORA1,FZD4,TXNRD2,UCP2,IRAK1,MECP2,ERCC2,MIR762,P2RX3,MLST8,EP300,NDNF,HDAC2,MIR140,BRIP1,ATP6V1A,TSC1,ADAM8,ADAM17,NFE2L2,BMP7,NPPC,MIR126…	c5_GO.Biological.Process
GOBP_NEGATIVE_REGULATION_OF_LEUKOCYTE_ADHESION_TO_VASCULAR_ENDOTHELIAL_CELL	0.00286158	0.0823487	0.431708	0.796309	1.82198	6	MIR141,MIRLET7E,MIR125A	c5_GO.Biological.Process	0.398785	0.768856	0.0922597	0.388109	1.04562	8	MIR141,MIRLET7E,MIR125A	c5_GO.Biological.Process
tRNA processing in the nucleus; datasource: reactome;	0.00288476	0.166123	0.431708	-0.37478	-1.724	53	NUP54,NUP155,RPP25,NUP210,SEH1L,TRNT1,NUP35,NUP43,NUP98,POM121C,CSTF2,NUP58,NUP133,ELAC2,C2orf49,NUP214,POP7,RAE1,CPSF4,TPR,FAM98B,NDC1,RANBP2,POP1,NUP37,POP4,NUP107,TSEN15,POP5,NUP160,RPP30,RTRAF	PathwayCommons11	0.022929	0.572801	0.352488	-0.323436	-1.5837	53	NUP155,C2orf49,POP7,RAN,SEH1L,NUP35,NUP37,NUP210,TSEN2,FAM98B,NDC1,CSTF2,NUP54,TPR,NUP133,ZBTB8OS,NUP153,POP5,NUP88,CPSF4,TRNT1,RAE1,POP1,TSEN54,RPP30,RPP40	PathwayCommons11
GOBP_REGULATION_OF_LOCOMOTION	0.00289549	0.0830113	0.431708	0.214232	1.35366	766	TNFRSF18,MMRN2,DPEP1,RIN2,CLDN7,ATP5F1B,EGFR,PIK3CD,MAZ,PLXNB2,LYN,TRIP6,NFE2L2,SMAD7,SP1,EFNA1,MIR200C,SEMA4B,BMP4,WNT5B,CDKN1B,MIR196A1,RAC3,MYLK,IGF1R,TMSB10,NSMF,CYP1B1,SCARB1,MET,JAG1,PDGFA,HOXA7,SEMA3B,FUT4,HAS2,MIRLET7F1,NF2,SMAD3,FUT7,CSF2,MIR551A,STK24,LMO4,PLEKHG3,TGFB1,MIR151A,PTK2,MKKS,MCAM,SPAG9,STK4,CITED2,MIR15A,MIR16-1,DAB2IP,ZMYND8,MIR101-1,FGF5,CLN3,PDCD6,CLASP1,ZNF268,P2RX4,REC…	c5_GO.Biological.Process	0.0660066	0.425862	0.224966	0.158183	1.1783	772	PHPT1,PKN1,CXCL16,MIR200C,MTA2,FAM89B,CYGB,STX3,MIR149,TBC1D24,SMAD7,RFFL,CLDN7,RPS6KB1,MIR497,MIR196A1,ZNF580,AMOTL2,GAS6,FUT7,CLN3,CTNNA1,LDB1,SOD2,FOXC2,MMP2,HTR1D,AKIRIN1,HOXA7,LRP1,TGFB1,CAV1,CCAR1,HDAC7,NOTCH1,PDGFC,MCAM,PRKD2,TBCCD1,RABGEF1,MIR15A,MIR16-1,PRKCE,RAB25,MIR10B,PLXNB2,WNK1,SIN3B,TMSB15B,ZNF268,STK10,EPHA4,MIR338,VEGFB,FERMT3,PFN1,ABL1,WNT5B,ARHGEF2,PRCP,CNN2,DUSP1,PLXNB1,SPNS2…	c5_GO.Biological.Process
GOBP_POSITIVE_REGULATION_OF_NITRIC_OXIDE_MEDIATED_SIGNAL_TRANSDUCTION	0.00291215	0.0831762	0.431708	0.939962	1.67759	3	EGFR,NOS1AP,INS	c5_GO.Biological.Process	0.122047	0.541729	0.17822	-0.626853	-1.4067	5	EGFR,NOS1AP	c5_GO.Biological.Process
Heterotrimeric GPCR signaling pathway (through glutamate, G alpha q and PLC beta) ( GPCR GroupI metabotropic glutamate receptor signaling pathway ); datasource: inoh; ""	0.00293971	0.166123	0.431708	0.593144	1.87516	15	PRKCH,PRKCD,PRKCZ,GNB5,PRKCG,PRKCA,PRKCE,RAF1,PRKCI,GNB3	PathwayCommons11	0.507968	0.880694	0.0780892	-0.296962	-0.972701	14	PRKCH,GNAQ,PRKCQ,PRKCA,ARAF	PathwayCommons11
REACTOME_CYTOSOLIC_IRON_SULFUR_CLUSTER_ASSEMBLY	0.00294621	0.116339	0.431708	0.644693	1.89626	13	BRIP1,NDOR1,CIAO3,ERCC2,POLD1,NUBP1,NUBP2,RTEL1,MMS19	c2_curated.Canonical.Pathways	0.402344	0.778728	0.0897105	0.325861	1.04697	13	NDOR1,CIAO3,ERCC2,BRIP1,CIAO2B,POLD1	c2_curated.Canonical.Pathways
GOBP_JNK_CASCADE	0.00294999	0.0839427	0.431708	0.320438	1.63893	125	LTBR,EDAR,MEN1,MAP4K2,EGFR,MECOM,MAPK10,IGF1R,CARD9,SMAD3,TAOK2,DAB2IP,AIDA,MAPK8,TRAF4,CD27,WNT7B,TNIK,MAPK9,NOD1,SEMA3A,DACT1,RB1CC1,MAP4K4,PHLPP1,MAP3K10,IL1B,MAP3K20,HIPK2,RIPK1,KLHL31,MAP3K11,STK3,MAPKBP1,UNC5CL,GSTP1,MBIP,PRMT1,TGFBR3,IL1A,TAOK1,COPS5,HIPK3,MAP2K7,DNAJA1,MAP3K12,DUSP10	c5_GO.Biological.Process	0.469345	0.806617	0.0855357	-0.168314	-0.998214	126	EGFR,MAP3K13,PTK2B,SH2D3A,MIR92A1,IGF1R,MAP4K1,PER1,GADD45A,TNIK,PRKN,UNC5CL,WNT5A,CCN2,PHLPP1,PJA2,MAP4K4,CYLD,ULK4	c5_GO.Biological.Process
KEGG_MELANOMA	0.00295151	0.116339	0.431708	0.427129	1.79067	45	BAD,EGFR,PIK3CD,IGF1R,MET,PDGFA,FGF5,NRAS,KRAS,MDM2,TP53,CCND1,FGF17,PDGFRA,AKT2,MAPK3,PIK3R3,FGF2	c2_curated.Canonical.Pathways	0.291165	0.702472	0.111011	0.228541	1.08789	49	CCND1,BAD,NRAS,PDGFC,PIK3R2,TP53,FGF21,AKT2,E2F1,CDH1,RAF1,FGF2,BRAF,FGF19,MAPK3,FGF22,PDGFA	c2_curated.Canonical.Pathways
CD22 mediated BCR regulation; datasource: reactome;	0.00301028	0.166839	0.431708	0.901294	1.80685	4	LYN,PTPN6,CD22	PathwayCommons11	0.146045	0.650561	0.164406	0.666723	1.38625	4	PTPN6,CD79A,CD22,LYN	PathwayCommons11
MicroRNA.MIR10.100.family	0.00302976	0.25147	0.431708	0.849582	1.84525	5	MIR125A,MIR99B,MIR10A	HUGO.Genes.groups	0.0011597	0.13852	0.45506	0.81221	1.98037	6	MIR10B,MIR125A,MIR99B,MIR125B2,MIR99A,MIR10A	HUGO.Genes.groups
Melanoma	0.00303364	0.0167573	0.431708	0.418224	1.74413	47	BAD,EGFR,PIK3CD,IGF1R,MET,PDGFA,FGF5,NRAS,KRAS,MDM2,BAX,TP53,CCND1,FGF17,PDGFRA,AKT2,MAPK3,PIK3R3,FGF2	NanoString_Genes	0.0788955	0.431548	0.224966	0.294471	1.39887	50	CCND1,BAD,NRAS,BAX,PDGFC,PMEL,PIK3R2,DDB2,TP53,FGF21,AKT2,E2F1,CDH1,RAF1,FGF2,BRAF,FGF19,MAPK3,FGF22,PDGFA	NanoString_Genes
GOBP_NEGATIVE_REGULATION_OF_NITRIC_OXIDE_SYNTHASE_ACTIVITY	0.0030544	0.0861614	0.431708	0.848684	1.81162	5	NOSIP,ATP2B4,MIR26A1,MIR27B	c5_GO.Biological.Process	0.784466	0.932907	0.0554793	-0.28443	-0.738704	7	MIR27B	c5_GO.Biological.Process
GOBP_CARDIAC_PACEMAKER_CELL_DEVELOPMENT	0.0030711	0.0861614	0.431708	-0.781041	-1.93647	7	BMPR1A,TBX3,BVES,SHOX2	c5_GO.Biological.Process	0.929688	0.977196	0.0479259	-0.253629	-0.612625	6	TBX3,BMPR1A	c5_GO.Biological.Process
IL12 signaling mediated by STAT4; datasource: pid;	0.00307664	0.167299	0.431708	0.605563	1.94224	16	CD247,TGFB1,ETV5,MAPK8,NFATC2,MAPK9,JUN,FOS,IRF1,STAT3,IL18R1,CREBBP,CD4	PathwayCommons11	0.770916	0.954091	0.0574877	0.223531	0.768638	16	TGFB1,CD4,CREBBP,FOS,MAPK9,STAT4	PathwayCommons11
GOBP_HAIR_CELL_DIFFERENTIATION	0.00308185	0.0861614	0.431708	0.437206	1.7449	39	BMP4,JAG1,JAG2,TPRN,ERCC2,ESRP1,SEC24B,WDPCP,MYCL,MYO6,GSDME,WHRN,TRIOBP,FGF2,PLS1,NOTCH1,USH2A	c5_GO.Biological.Process	0.23494	0.661171	0.12564	0.254545	1.17134	41	PAFAH1B1,JAG2,TPRN,ESRP1,NOTCH1,POU4F3,BMP4,TRIOBP,ERCC2,SCRIB,FGF2,MYO7A,SEC24B	c5_GO.Biological.Process
GOBP_REGULATION_OF_HORMONE_LEVELS	0.00308628	0.0861614	0.431708	0.249814	1.44887	314	CYP27B1,RDH11,BAD,SYT7,SLC16A2,PLB1,SNAP23,ADM,H6PD,ACSL4,LYN,SGPL1,IL11,EGR1,IGF1R,NR1D1,CPT1A,CYP1B1,ECE1,RAB1A,CYP46A1,CYP26B1,CPLX3,BMP6,STARD3,ACVR2B,FOXE1,ALDH1A3,C2CD2L,NR3C1,PCSK6,PFKL,PER2,FFAR1,SREBF1,DHRS3,CDK16,KDM5B,ATP1A1,PPP3CA,SLC3A2,PCSK4,IL4I1,SELENOT,SERP1,IRS1,AIMP1,DKK3,PRKAR1A,STX1A,GIPR,UBE2Q1,RAB11FIP5,IL1B,LHB,CAPN10,MIDN,STUB1,DGKQ,MPC2,CACNA1H,PNPLA2,PDGFRA,SIRT3,PIM3,R…	c5_GO.Biological.Process	0.966957	0.989328	0.0408229	0.113945	0.782228	315	NR3C1,INHBA,BAD,ECE1,TCIRG1,CTSK,ARNT,CLCN2,MIDN,RBM4,ANO1,IL11,CYP2S1,HSD17B1,NAGLU,PCSK6,ACVR2B,BCAT2,STC2,LIF,PRKCE,ZBED6,NOS2,MPC2,BMAL1,UBE2Q1,ORAI1,FOXE1,BCO2,LTBP4,ALDH1A3,FOXD1,ADCY5,RDH10,BBS1,CAMK2G,NDST2,FOXA1,MED1,JAGN1,PCSK4,ADORA1,FZD4,BAIAP3,PTPN11,WNT4,LRP5,PNPLA2,UCP2,STAT5B,TFR2,ADAM10,RAF1,CRY2,MCU,GFI1,KDM5B,STARD3,CRABP2	c5_GO.Biological.Process
REACTOME_ARYL_HYDROCARBON_RECEPTOR_SIGNALLING	0.00308875	0.120493	0.431708	0.841008	1.80892	5	AIP,PTGES3,ARNT2,ARNT,AHR	c2_curated.Canonical.Pathways	0.0146055	0.213419	0.38073	0.73144	1.70216	5	ARNT,HSP90AB1,PTGES3,AIP	c2_curated.Canonical.Pathways
GOBP_ENDOPLASMIC_RETICULUM_PLASMA_MEMBRANE_TETHERING	0.00309315	0.0861614	0.431708	0.792882	1.81414	6	ESYT1,ESYT2,GRAMD2A,VAPA	c5_GO.Biological.Process	0.361224	0.748643	0.09855	0.44437	1.0866	6	VAPB,ESYT1,VAPA,GRAMD2A,ESYT3	c5_GO.Biological.Process
GOBP_RESPONSE_TO_MONOSACCHARIDE	0.00309576	0.0861614	0.431708	0.300561	1.57364	145	BAD,CDKN1B,EGR1,IGF1R,NR1D1,RMI1,MIR15A,MIR16-1,ACVR2B,C2CD2L,KHK,PFKL,SREBF1,CDK16,RACK1,SOD2,PPP3CA,APOA2,SELENOT,TWNK,MIR320E,GIPR,RAB11FIP5,KAT5,RUNX2,MPC2,PIM3,SRF,GCLC,THBS1,ANO1,TRPM4,EIF2B4,UNC13B,EXTL3,PRKCE,MIR320B2,NADK,UBTF,CLTRN,SMAD2,TCF7L2,RAF1,FOXA2,IL1A,TXNIP,SRI,RBM4,CCDC186,MAFA,VAMP2,GPX1,MIR320A,GLUL,PIH1D1,SIDT2,CFTR,SLC26A6,PRKAA2,KLF7,GCKR	c5_GO.Biological.Process	0.315197	0.723398	0.101714	0.176853	1.07458	145	SLC29A1,GYS2,BAD,RPS6KB1,PAX2,RBM4,GAS6,ANO1,SOD2,ACVR2B,NPTX1,GCLC,MIR15A,MIR16-1,PRKCE,ZBED6,MPC2,MIR320E,TWNK,XBP1,EIF2B5,CASP3,TRA2B,EXTL3,ADCY5,FGF21	c5_GO.Biological.Process
GOBP_INNER_EAR_AUDITORY_RECEPTOR_CELL_DIFFERENTIATION	0.00314719	0.0872745	0.431708	0.47097	1.80933	34	BMP4,JAG1,JAG2,TPRN,ESRP1,SEC24B,WDPCP,MYCL,MYO6,GSDME,WHRN,TRIOBP,FGF2,PLS1,NOTCH1,USH2A	c5_GO.Biological.Process	0.126482	0.550488	0.175204	0.291192	1.2828	35	PAFAH1B1,JAG2,TPRN,ESRP1,NOTCH1,POU4F3,BMP4,TRIOBP,SCRIB,FGF2,MYO7A,SEC24B	c5_GO.Biological.Process
GOBP_CIRCADIAN_REGULATION_OF_GENE_EXPRESSION	0.00318077	0.0877473	0.431708	0.397146	1.76034	60	NRIP1,ID2,KDM5A,EGR1,NR1D1,PML,KDM2A,BHLHE41,CAVIN3,KMT2A,PER2,MTA1,NGFR,RAI1,NCOA2,ATF4,LGR4,PPP1CA,NAMPT,HDAC2,HUWE1,CSNK1E,CSNK1D,PER3,RBM4,ZFHX3,GFPT1,PER1,SIRT1,NPAS2,PRMT5	c5_GO.Biological.Process	0.206226	0.638421	0.132846	0.23837	1.18078	58	RELB,PRMT5,PPARA,RBM4,LGR4,TOP1,CSNK1E,BMAL1,KDM2A,RAI1,ZFHX3,NGFR,OGT,CRY2,MYBBP1A,HDAC2	c5_GO.Biological.Process
GOBP_EPITHELIAL_TUBE_MORPHOGENESIS	0.00318725	0.0877473	0.431708	0.261623	1.47397	239	MMRN2,ADM,IFT122,PIK3CD,PLXNB2,PTK7,BMP4,HOXB7,HOXA11,MET,PML,SMAD3,HOXA5,LMO4,GZF1,TGFB1,MKKS,VDR,STK4,RARA,CITED2,MIR16-1,TCAP,FZD2,NRARP,PRICKLE1,ABL1,NR3C1,SOX9,GRHL3,DVL1,TBX2,MYC,GRHL2,LUZP1,KRAS,KDM5B,NKX2-1,KIF20B,FOXP1,TBX6,LZTS2,SOSTDC1,CSF1,PRKD2,SEMA4C,SEC24B,EPHA4,RARG,ARHGAP35,MDK,RASIP1,EXT1,GNA13,SRF,NOG,FGFR2,PTCH1,NRP1,TACSTD2,LGR4,PPP1CA,FGF2,WNT11,ENG,SALL4,SPINT1,SPINT2,PFN1,…	c5_GO.Biological.Process	0.00063233	0.0405488	0.477271	0.247825	1.6318	249	DVL2,NR3C1,PTK7,SPRY1,CLUAP1,CECR2,HOXB7,PAX2,LGR4,FOXC2,HOXA5,KAT2A,TGFB1,TBX6,NOTCH1,SOX18,PRKD2,PTCH1,MYC,FZD1,MIR16-1,PLXNB2,LZTS2,EPHA4,TMEM59L,PFN1,ABL1,MKS1,CITED1,RARG,FOXD1,MDK,SIX4,CASP3,WNT2B,MKKS,GRHL2,TBX2,RDH10,FZD2,OVOL2,VASP,KDM2B,FOXA1,SEMA4C,BMP4,MED1,CELSR1,HOXA11,SETDB2,MED12,WNT11,SMO,WNT4,LRP5,EPHA2,TGFBR2,HOXD11,FUZ,SPINT2,DLL4,LMO4,DLG1,MMRN2,HS3ST3B1,SCRIB,KDM5B,TCAP,ST14…	c5_GO.Biological.Process
WP_HIPPO_MERLIN_SIGNALING_DYSREGULATION	0.00318748	0.123076	0.431708	0.354975	1.68437	79	BUB1B-PAK6,PAK6,EGFR,IGF1R,TEAD3,MET,NF2,CDH16,ITGB6,PTK2,NRAS,MYC,KRAS,CTNNA1,NGFR,AJUBA,PRKAR1A,CCND1,ITGB5,CDH15,PDGFRA,ITGA1,FGFR2,NTRK1,PPP1CA,CUL4A,MIR98,STK3,PAK5,WWTR1,YAP1,CDH24,TEAD2,TEAD1,ITGB4,ITGB3	c2_curated.Canonical.Pathways	0.0631365	0.424634	0.257206	0.256859	1.39934	86	RBX1,CCND1,CDH24,NRAS,CTNNA1,PRKAR1B,ITGB2,ITGA10,ITGB4,ITGAE,MYC,CDH3,CDH16,FGFR4,BUB1B-PAK6,PAK6,ITGA2B,CDH1,EPHA2,NGFR,ITGA3,ITGB8,MST1,NTRK1,WWTR1,FGFR2,ITGB5,ITGA11,ITGA5,CUL4A,FGFR3,FOXM1,AJUBA	c2_curated.Canonical.Pathways
GOBP_CHOLESTEROL_EFFLUX	0.00320805	0.0880022	0.431708	0.416797	1.74554	46	TSKU,SCARB1,ABCA2,LAMTOR1,ABCA5,MIR26A1,MIR33B,NFKBIA,PLTP,APOA2,NR1H2,RXRA,ABCA7,MIR613,MIR27B,PTCH1,ABCA1,APOE	c5_GO.Biological.Process	0.301811	0.71062	0.10882	0.232192	1.11251	50	ABCA3,ABCG1,LRP1,ABCA1,CAV1,PTCH1,NR1H3,ABCA7,ZDHHC8,YJEFN3,STX12,MIR9-1	c5_GO.Biological.Process
GOBP_TUBE_FORMATION	0.00322949	0.0882728	0.431708	0.313846	1.59385	120	MMRN2,EDAR,ADM,IFT122,HOXA1,PIK3CD,PLXNB2,PTK7,BMP4,LMO4,TGFB1,STK4,RARA,CITED2,DAB2IP,TCAP,FZD2,PRICKLE1,ABL1,SOX9,GRHL3,DVL1,GRHL2,LUZP1,KIF20B,SEMA4C,SEC24B,RARG,ARHGAP35,NOG,FGFR2,PTCH1,NFIB,FGF2,SALL4,SPINT1,SPINT2,PFN1,STK3,MTHFR,TCTN1,NOTCH1	c5_GO.Biological.Process	0.00019137	0.0195038	0.518848	0.319871	1.86491	120	DVL2,PTK7,CLUAP1,CECR2,PAX2,KAT2A,TGFB1,NOTCH1,PTCH1,FZD1,PLXNB2,PFN1,ABL1,MKS1,HOXA1,RARG,BCL2L11,SIX4,CASP3,GRHL2,FZD2,OVOL2,VASP,KDM2B,SEMA4C,BMP4,CELSR1,DAB2IP,MED12,WNT4,FUZ,SPINT2,LMO4,MMRN2,SCRIB,TCAP,ST14,RET,TSC1,FGF2,SEC24B,BMP7,HIF1A,FGFR2,FZD3,BBS4,SPINT1,GLMN,NOG,TULP3,PIK3CD,MTHFR,STK3,HECTD1,DVL3,IFT57	c5_GO.Biological.Process
GOBP_NEGATIVE_REGULATION_OF_PRODUCTION_OF_MOLECULAR_MEDIATOR_OF_IMMUNE_RESPONSE	0.0032411	0.0882737	0.431708	0.536049	1.86269	23	AXL,SMAD7,BCL6,TGFB1,CD22,NLRX1,APOA2,FOXP3,PRG2,TMBIM6	c5_GO.Biological.Process	0.0354649	0.337145	0.321776	0.417419	1.60104	22	AXL,TMBIM6,SMAD7,TGFB1,RABGEF1,JAK3,BST2	c5_GO.Biological.Process
PID_MTOR_4PATHWAY	0.0032844	0.125537	0.431708	0.395126	1.74161	58	MAPKAP1,AKT1S1,PML,ULK1,YWHAZ,NRAS,IKBKB,SREBF1,KRAS,SFN,RICTOR,EIF4A1,IRS1,RB1CC1,PXN,RPTOR,MAPK3,PRKCA,YWHAG,YWHAQ,PDPK1,PRR5,RHEB,MLST8,RAF1	c2_curated.Canonical.Pathways	0.0964567	0.487152	0.202072	0.26477	1.34224	61	EIF4A1,RPS6KB1,NRAS,EIF4B,YWHAZ,RPTOR,CDK2,PRR5,EIF4EBP1,EEF2,RRAGD,ULK1,YY1,MLST8,RAF1,AKT1S1,TSC1,BRAF,PXN,MAPK3,RAC1,POLDIP3,MTOR,ATG13,RB1CC1,MAP2K2,PDPK1,SREBF1,CLIP1,TSC2	c2_curated.Canonical.Pathways
Heterotrimeric GPCR signaling pathway (through G alpha q, PLC beta and ERK cascade) ( GPCR signaling (G alpha q) ); datasource: inoh; ""	0.00328493	0.175318	0.431708	0.317561	1.60814	110	INHBC,INHBE,BMP4,PRKCH,WNT5B,BMP8B,OXT,IL11,JAG1,PDGFA,CSF2,BTC,WNT10A,TGFB1,BMP6,FGF5,FZD2,PRKCD,WNT7B,JAG2,VEGFB,WNT9A,KITLG,PRKCZ,FGF17,IL1B,LHB,NTF4,GNB5,PRKCG,PRKCA,PRKCE,FGF2,WNT11	PathwayCommons11	0.0637057	0.573152	0.287805	0.243167	1.38206	112	INHBA,JAG2,IL11,TGFB1,WNT7B,FZD1,LIF,PRKCE,VEGFB,WNT5B,WNT10A,NTF3,WNT2B,DHH,FZD2,FGF21,BMP4,NTF4,TXLNA,PRKCD,ADORA1,FZD4,WNT11,SMO,WNT4,ADORA2A,PYY,DLL4,RAF1,FZD9,FGF2,BRAF,FGF19,BMP7,GNB5,FGF22,PRKCZ,PDGFA,FZD3,GNB3	PathwayCommons11
REACTOME_CYTOKINE_SIGNALING_IN_IMMUNE_SYSTEM	0.0033647	0.126517	0.431708	0.224516	1.38349	541	LTBR,TNFRSF18,EDAR,PTPN18,PIK3CD,TNFRSF1A,LYN,SMAD7,PTPN6,ANXA2,CDKN1B,LCN2,CENPX,MAPK10,PTPN13,IL11,EGR1,BCL6,CLCF1,PML,SMAD3,CSF2,CAPZA1,TGFB1,AIP,ISG15,SOS2,RPS6KA3,JAK1,PSMB7,TALDO1,SH2B3,GBP6,UBE2M,PRKCD,UBE2V1,TNFRSF25,TRIM8,MAPK8,YWHAZ,SNRPA1,SOCS2,UBC,NRAS,STAT6,RELA,NEDD4,IKBKB,MYC,CD27,NFKBIA,MCL1,KRAS,JUNB,NLRX1,PTPN1,MAPK9,IL11RA,RPS6KA2,IL1R1,SOD2,NOD1,TUBA1B,EIF4A1,TNFSF13,TNFSF12,I…	c2_curated.Canonical.Pathways	0.0126389	0.202526	0.38073	0.182815	1.30776	529	RBX1,MAP2K7,MCL1,PSMC3,CCND1,RELB,IRF3,NKIRAS2,PTPN9,EIF4A1,TNFSF13,PTPN6,ISG15,PSMB6,CAPZA1,STX3,TBK1,TRIM8,SHC1,SMAD7,TUBB6,CIITA,KPNB1,NRAS,DUS2,SIGIRR,IL11,SOD2,MMP2,SNRPA1,STAT6,TGFB1,PSMD8,TNFSF9,TNFRSF13C,PTPN7,PSMD3,ITGB2,UBE2E1,CD4,YWHAZ,PSMB10,MYC,LIF,TNFRSF25,NOS2,NUP50,EIF4G2,PIK3R2,PSME3,BECN1,NUP43,POM121,CNN2,MAPK11,HSP90AA1,VAV1,NFKB2,IRF6,BCL2L11,JAK3,UBE2D3,CASP3,TNFSF12,SOX2,AR…	c2_curated.Canonical.Pathways
GOBP_REGULATORY_NCRNA_MEDIATED_GENE_SILENCING	0.00336901	0.0914129	0.431708	0.237065	1.41656	393	MIR190A,MIR192,MIR194-2,SRRT,MIR661,MIR141,MIR200C,MIR636,MIR3619,MIRLET7BHG,BMP4,MIR196A1,MIR196B,HOXA10-AS,MIR7-1,PIWIL4,MIRLET7A1,MIRLET7D,MIRLET7F1,MIRLET7E,MIR125A,MIR99B,SMAD3,MIR551A,DDX5,MOV10,TGFB1,MIR556,MIR151A,MIR1183,MIR15A,MIR16-1,MIR554,MIR101-1,MIR944,EXOSC3,ZC3H10,MIR29A,MIR29B1,MIRLET7I,MIR26A1,MIR1207,MIR1208,MIR324,TNRC6A,MIR33B,PLD6,DDX17,MIR365A,MIR193B,MIR569,XPO5,MIR196A2,…	c5_GO.Biological.Process	0.0115572	0.205038	0.38073	0.199777	1.39568	392	TDRKH,MIR192,MIR194-2,TNRC6B,MIR141,MIR200C,MOV10,MIR149,ZFP36,DDX3X,MIR195,MIR497,MIR196A1,MIR3619,MIRLET7BHG,RBM4,MIR455,MIR26A2,MIR203A,MIR671,PUS10,TGFB1,MIR938,MIR604,MIR1180,MIR139,EIF6,NCBP3,MIR648,MIR15A,MIR16-1,XPO5,MIR10B,MIR320E,MIR338,MIR657,MIR6869,MIR1237,MIR632,CNOT11,MIR589,MIR638,MIR1224,MIR191,MIR425,MIR1227,MIR34AHG,MIR34A,TP53,HELZ2,TIAL1,MIR152,MIR554,MIR196A2,MIR26B,BMP4,MIR…	c5_GO.Biological.Process
KEGG_MEDICUS_REFERENCE_RAD51_DSDNA_DESTABILIZATION	0.00337691	0.126517	0.431708	-0.684136	-1.93921	10	RAD51B,RAD51D,RAD51,XRCC2,RPA1,RAD51C,RFWD3	c2_curated.Canonical.Pathways	0.616601	0.864454	0.0678338	0.291876	0.874986	11	RAD51D,HELQ,RFWD3	c2_curated.Canonical.Pathways
GOBP_RESPONSE_TO_RETINOIC_ACID	0.00339186	0.0914129	0.431708	0.37802	1.73341	69	LYN,PTK7,WNT5B,DKK1,HOXA2,RARA,CYP26B1,BMP6,SOX9,TBX2,SREBF1,WNT7B,WNT9A,RXRA,PTK6,RARG,FGFR2,PTCH1,ABCA1,HDAC2,WNT11,ASXL1,TNC,MMP2,TBX1,CREB1,YAP1,WNT3A	c5_GO.Biological.Process	0.143434	0.573071	0.165657	0.237008	1.24167	76	PTK7,OVCA2,PAX2,HTRA2,MMP2,ABCA1,PTCH1,WNT7B,WNT5B,RARG,TBX2,TBX1,FZD4,CDKN2D,WNT11,NDUFA13,GJB2,PTK6,HDAC2,LTK,RET,NCOA1,FGFR2	c5_GO.Biological.Process
GOBP_POSITIVE_REGULATION_OF_JNK_CASCADE	0.00339232	0.0914129	0.431708	0.382361	1.72644	65	LTBR,EDAR,MAP4K2,CARD9,TAOK2,DAB2IP,TRAF4,CD27,WNT7B,TNIK,NOD1,SEMA3A,RB1CC1,MAP3K10,IL1B,HIPK2,RIPK1,MAP3K11,STK3,MAPKBP1,UNC5CL,MBIP,IL1A,TAOK1,MAP2K7	c5_GO.Biological.Process	0.459144	0.801146	0.0822055	0.195104	1.00254	65	MAP2K7,MAP3K11,CARD9,WNT7B,MAP4K2,TRAF4,RASGRP1,MTURN,SH3RF3,DAB2IP,TAOK1,MAPK8IP1,LTBR,FGF19,MAP2K4,MAP3K5,RIPK1,ANKRD6,CRK,WNT7A,RB1CC1,MAPKBP1,CD27,STK3,MAP3K10,APP	c5_GO.Biological.Process
KEGG_MEDICUS_REFERENCE_GF_RTK_PI3K_SIGNALING_PATHWAY	0.0034162	0.126734	0.431708	0.409722	1.76412	51	EGFR,PIK3CD,EFNA1,IGF1R,MET,PDGFA,ERBB3,FGF5,VEGFB,KITLG,NGFR,CSF1,FGF17,PDGFRA,AKT2,NTF4,FGFR2,NTRK1,PIK3R3,FGF2	c2_curated.Canonical.Pathways	0.228346	0.640827	0.126254	0.227743	1.15454	61	PDGFC,VEGFB,PIK3R2,NTF3,FGFR4,EFNA1,EFNA4,FGF21,AKT2,NTF4,PGF,EPHA2,NGFR,FGF2,FGF19,NTRK1,FGF22,FGFR2,EFNA3,PDGFA,FGFR3	c2_curated.Canonical.Pathways
MicroRNA.MIR141.200.family	0.00341954	0.260343	0.431708	0.846602	1.83878	5	MIR141,MIR200C,MIR200A,MIR200B,MIR429	HUGO.Genes.groups	0.00736998	0.416986	0.407018	0.777217	1.75831	5	MIR141,MIR200C,MIR200A,MIR200B,MIR429	HUGO.Genes.groups
GOBP_EPIDERMAL_CELL_DIFFERENTIATION	0.00343656	0.0922408	0.431708	0.296798	1.55394	145	CYP27B1,FOSL2,PLEC,KEAP1,GLI1,BMP4,PRKCH,JAG1,HOXA7,ETV4,VDR,STK4,CYP26B1,MACROH2A1,TP63,KRT7,KRT86,CFLAR,GRHL2,JAG2,SHARPIN,SFN,NFKBIZ,PPP3CA,TPRN,ERCC2,ESRP1,EVPL,NCOA3,ZFP36L1,NME2,SEC24B,KRT17,FOXN1,ASAH1,WDPCP,MYCL,MYO6,GSDME,PTCH1,EXTL3,WHRN,TRIOBP,FGF2,HDAC2,ZFP36,IRF6,PLS1,NOTCH1,USH2A,IL1A,MED1,KRT80,TXNIP,FOXC1,YAP1,SULT2B1	c5_GO.Biological.Process	0.0321972	0.316395	0.321776	0.22494	1.37807	149	ETV4,PAFAH1B1,OVOL1,KAZN,JAG2,ZFP36,MAFG,TPRN,ESRP1,MACROH2A1,HOXA7,NOTCH1,SRSF6,PTCH1,CDH3,POU4F3,IRF6,CASP3,EXTL3,GRHL2,OVOL2,BMP4,MED1,SULT2B1,TRIOBP,SHARPIN,ACER1,PALLD,CD109,FOXC1,EPHA2,FOXI3,ERCC2,ERRFI1,SCRIB,HDAC2,ST14,FGF2,MYO7A,CYP27B1,SEC24B,PPL,EVPL,PIP5K1A,VDR,NME2,GRHL1,NFKBIZ,CFLAR,DSP,KRT16,DLX3,PTCH2,PPHLN1,LORICRIN,WDPCP,KEAP1	c5_GO.Biological.Process
WP_HOST_PATHOGEN_INTERACTION_OF_HUMAN_CORONAVIRUSES_MAPK_SIGNALING	0.00347208	0.127557	0.431708	0.475579	1.85187	32	MAPK10,RPS6KA3,MAPK8,JUNB,MAPK9,RPS6KA2,IFITM2,IFITM1,MAPK11,MAPK12,JUN,MAP3K10,FOS,MAPK3,MAP3K11,MAPK13,IFITM3,RAF1,MAP2K7	c2_curated.Canonical.Pathways	0.348697	0.750441	0.0995791	0.249917	1.07074	34	MAP2K7,MAP3K11,MAPK11,MAPK12,RPS6KA2,BST2,FOS,MAPK9,MAPK14,RAF1,MAPK3,MAP2K4	c2_curated.Canonical.Pathways
GOBP_CALCIUM_ION_HOMEOSTASIS	0.00349748	0.0922408	0.431708	0.274093	1.50018	195	CYP27B1,PLCB3,NOL3,LYN,PTPN6,CAPN3,STOML2,NT5E,PML,TMEM165,TPT1,VDR,RAP1GDS1,CLN3,SLC25A23,ATP2B4,ABL1,CAV2,CACNB4,CORO1A,VPS54,PACS2,GRIN1,TNNI3,ITPR3,TMEM203,ATP1B1,BAX,SNX10,BAK1,ZNHIT1,CNGB1,BCAP31,GRID2IP,CALM3,ATP2A3,CYBA,P2RX1,HTT,HRC,ATF4,SLC8A2,ATG5,ATP7B,PRKCE,F2R,TMBIM6,GP1BB,ITPR2,FGF2,APOE,RMDN3,PDPK1,SLC25A27,HSP90B1,FKBP1A,S100A14,JSRP1,PLCB2,HERPUD1	c5_GO.Biological.Process	0.0192551	0.256432	0.352488	0.219855	1.40018	195	DMPK,TMBIM6,PTPN6,JSRP1,JPH4,SLC25A23,PLCB3,TMEM203,CHERP,TCIRG1,CLN3,BAX,ATP2A1,MCOLN1,GP1BB,CAV1,STC2,ATP2A2,PRKCE,HRC,TRPC3,ATP13A2,HEXB,ABL1,FKBP1A,TMEM38A,TPCN2,ATP2C2,ATP13A1,ITPR2,HAP1,TPT1,ATP2C1,VAPB,ATP7B,FAM20A,ADORA1,BNIP1,SLC8A2,TRPC1,CX3CL1,CCDC47,GSTM2,VPS54,SLC30A1,MCU,LIME1,CAV2,STIM1,MTLN,FZD9,FGF2,CYP27B1,PTH1R,NPPC,THADA,HERPUD1,CACNB4,BCAP31,HCRTR1,HTT,NPTN	c5_GO.Biological.Process
GOBP_LOCOMOTION	0.00350095	0.0922408	0.431708	0.205581	1.31363	863	TNFRSF18,MMRN2,DPEP1,RIN2,CLDN7,ATP5F1B,EGFR,PIK3CD,MAZ,PLXNB2,LYN,TRIP6,PLEC,NFE2L2,SMAD7,SP1,EFNA1,MIR200C,SEMA4B,BMP4,WNT5B,CDKN1B,HOXB9,MIR196A1,RAC3,MYLK,IGF1R,TMSB10,NSMF,CYP1B1,SCARB1,MET,JAG1,PDGFA,HOXA7,SEMA3B,FUT4,HAS2,MIRLET7F1,NF2,SMAD3,FUT7,CSF2,MIR551A,STK24,LMO4,PLEKHG3,CXCR5,TGFB1,MIR151A,PTK2,MKKS,MCAM,SPAG9,STK4,CITED2,MIR15A,MIR16-1,DAB2IP,ZMYND8,MIR101-1,FGF5,CLN3,PDCD6,CLASP1…	c5_GO.Biological.Process	0.0515298	0.395641	0.252961	0.156411	1.17979	869	PHPT1,PKN1,CXCL16,MIR200C,MTA2,FAM89B,CYGB,STX3,MIR149,TBC1D24,SMAD7,RFFL,CLDN7,RPS6KB1,MIR497,HOXB9,MIR196A1,ARHGEF16,ZNF580,AMOTL2,GAS6,FUT7,CLN3,CTNNA1,LDB1,SOD2,FOXC2,MMP2,HTR1D,AKIRIN1,HOXA7,LRP1,TGFB1,CAV1,CCAR1,HDAC7,NOTCH1,ITGB2,PDGFC,MCAM,PRKD2,TBCCD1,RABGEF1,PIP5K1C,MIR15A,MIR16-1,PRKCE,RAB25,MIR10B,PLEKHG5,PLXNB2,WNK1,SIN3B,TMSB15B,ZNF268,STK10,EPHA4,BSG,MIR338,VEGFB,FERMT3,PFN1,ABL1,W…	c5_GO.Biological.Process
GOBP_CHEMICAL_HOMEOSTASIS	0.00350695	0.0922408	0.431708	0.21471	1.34785	685	CYP27B1,BAD,PLCB3,SCNN1A,TMEM9,FOSL2,EHD1,ATP5F1B,TSKU,FBXL5,GLRX3,HAMP,USF2,NOL3,LYN,SLC12A9,FTH1,PTPN6,CAPN3,SLC34A3,STOML2,TM6SF2,IGF1R,NR1D1,SCARB1,NT5E,MED13,RMI1,HAS2,PML,ABCA2,FOXK2,ITGB6,SLC9A8,TMEM165,TPT1,ACOX1,USF1,LACC1,DHPS,TTC7A,MBD5,VDR,LAMTOR1,MIR15A,MIR16-1,ABCA5,BMP6,STK11,RAP1GDS1,CLN3,SLC9A2,SLC25A23,ATOX1,CIAO3,ATP2B4,ABL1,C2CD2L,CAV2,CACNB4,HECTD4,ATP1B3,RALY,FFAR1,MYC,SLC9A…	c5_GO.Biological.Process	0.0528053	0.398022	0.252961	0.162259	1.19978	684	DMPK,TMBIM6,EHD1,NKIRAS2,COX19,PTPN6,JSRP1,SLC29A1,ACOX1,JPH4,SLC25A23,BAD,PLCB3,LACC1,SLC9A5,ATP6V0C,DDX3X,ADNP,SPNS1,TMEM203,CHERP,TCIRG1,RNASEK,PAX2,RBM4,GAS6,ISCU,ANO1,CLN3,BAX,ATP2A1,SOD2,ABCA3,ABCG1,NAGLU,MCOLN1,TMEM9,ABCA1,USF1,GP1BB,CAV1,SLC34A3,NPTX1,STC2,PTCH1,KCTD7,ATP2A2,LCAT,DHPS,MYC,GCLC,WNT7B,MIR15A,MIR16-1,PRKCE,HRC,WNK1,TRPC3,ZBED6,MPC2,MIR320E,ATP13A2,TWNK,HEXB,NR1H3,ABL1,FKBP1A…	c5_GO.Biological.Process
GOBP_REGULATION_OF_PROTEIN_CONTAINING_COMPLEX_ASSEMBLY	0.00350887	0.0922408	0.431708	0.251666	1.46483	322	CDC42EP3,CLDN7,PRRT2,SPTB,CAND1,VPS39,TRABD2B,CDKN1B,DKK1,TRIM65,TMSB10,TRABD2A,NOP53,MET,EPS8,RALB,CSF2,CAMSAP1,LMO4,CAPZA1,TGFB1,MKKS,ISG15,ESAM,ANKRA2,DAB2IP,PIEZO1,AIDA,FAF1,CLASP1,ATF7IP,PRKCD,ABL1,ULK1,SOX9,MAPK8,SPTBN5,TPPP3,CORO1A,NCKAP1,RACK1,BAG4,MAPK9,RNF4,RICTOR,TMC8,STXBP1,NCKAP1L,MAVS,BAX,RANGRF,PRKCZ,BAK1,NR1H2,DACT1,HAUS4,AJUBA,HCFC1,STX1A,TP53,ADD1,SENP6,DMTN,ARPC2,STUB1,RHOC,RAS…	c5_GO.Biological.Process	4.32547e-05	0.00825191	0.557332	0.249042	1.70304	328	MARK4,NAPA,ISG15,CAPZA1,DDX3X,HCLS1,CLDN7,GSN,KANK3,RNF4,TPPP,ARL2,GBA2,AVIL,ZNF827,HAX1,BAX,CDC42EP3,ABCA3,ABCA1,TGFB1,ELN,VPS18,PLEKHG2,CSNK1A1,SVIL,CDC42EP1,FARP2,LCAT,TPPP3,RANGRF,PRKCE,PPP2R5B,TMSB15B,NCLN,PFN1,ABL1,PIK3R2,SNX9,SPTBN4,HSP90AA1,ARPC3,BCL2L11,CAPG,MKKS,TP53,ARHGAP40,NCKAP1L,ANKRA2,JMJD6,VASP,PRRT2,CPTP,DHX33,FNIP1,AKAP9,TRIOBP,PIEZO1,FCHSD1,DAB2IP,PFN2,STX1B,PRKCD,WARS1,CDC42,…	c5_GO.Biological.Process
GOBP_CELLULAR_RESPONSE_TO_OXYGEN_LEVELS	0.00350951	0.0922408	0.431708	0.305344	1.57685	134	BAD,NOL3,NFE2L2,CDKN1B,EGR1,NOP53,DDAH1,TGFB1,BRIP1,CITED2,CFLAR,MYC,SLC9A1,MDM2,CPEB4,PLK3,NDRG1,AJUBA,ADO,ENO1,TP53,ZFP36L1,RPTOR,FOS,RWDD3,EPHA4,STUB1,CCDC115,ATF4,MIEF1,HIPK2,HILPDA,FGFR2,EGLN3,TIGAR,PRKCE,TMBIM6,MALAT1,LPAR1,EGLN2,CPEB2,NOTCH1	c5_GO.Biological.Process	0.306818	0.717063	0.103958	0.183519	1.08686	131	TMBIM6,SLC29A1,BAD,USP19,TGFB1,CAV1,NOTCH1,STC2,MYC,RPTOR,PRKCE,EPHA4,SDHD,ATP6V0D1,MIR34A,TP53,NDUFS2,NONO,TMEM199,FOS,IRAK1,MLST8,NDNF,MIR140,BRIP1,ATP6V1A,TSC1,ADAM8,NFE2L2,BMP7,MIR126,HIF1A,HMOX1,FGFR2,HP1BP3,DDAH1,ATF4,MIEF1,NPEPPS,RWDD3,SLC9A1,AJUBA,MTOR,CFLAR,EGLN2,EPAS1,PHB2	c5_GO.Biological.Process
GOBP_REGULATION_OF_STEM_CELL_DIFFERENTIATION	0.00351681	0.0922408	0.431708	0.381406	1.72213	65	CHD3,MTA3,NFE2L2,ZFP36L2,CHD4,JAG1,SOX6,PRICKLE1,YTHDF2,ABL1,SOX9,MTA1,MTA2,OCIAD1,HOXB4,KAT5,PDGFRA,TACSTD2,FGF2,HDAC2,GATAD2A,ZFP36,NOTCH1,HSPA9,SETD1A,FOXC1,YAP1,NELFB,EIF2AK2,TEAD2,TGFB2	c5_GO.Biological.Process	0.346304	0.739572	0.0982123	0.208002	1.06882	65	MTA2,CHD3,ZFP36,CHD4,MTA3,NOTCH1,ABL1,N4BP2L2,NUDT21,GATAD2A,SOX6,FOXC1,ZFP36L2,SETD1A,HDAC2,HOXB4,FGF2,NFE2L2,NKX2-5,NELFB,KAT5,SLC4A11,MTA1,LBH,LTBP3,CDK12	c5_GO.Biological.Process
GOBP_REGULATION_OF_CELL_JUNCTION_ASSEMBLY	0.00352351	0.0922408	0.431708	-0.279512	-1.54857	134	VEGFA,LDB1,FAM107A,SEMA4D,PEAK1,S100A10,EPHB2,FARP1,COLQ,EPHA2,FMN1,VSTM5,IRX3,SETD5,RAC1,EPB41L5,EFNA5,FLRT3,PDLIM5,NPHP4,TLN1,IL1RAPL2,RAP1B,COL16A1,RAP1A,ARHGAP6,ADGRB1,GPRASP3,NECTIN1,MUSK,NTN1,ITGB1BP1,CORO1C,LIMCH1,RAPGEF1,SIX4,LRRN1,SYNDIG1,ROCK2,SDC4,CLDN1,PTPRJ,SNAP25,ROCK1,RAP2A	c5_GO.Biological.Process	0.952652	0.985561	0.0454059	0.123942	0.734021	131	ADNP,CHD4,AGRN,LDB1,F11R,CAV1,FZD1,ABL1,STAU2,CRB3,SIX4,EFNB3,PPM1F,EPHB3,ARMCX5-GPRASP2,GPRASP3,NLGN3,WNT4,EPHA2,OGT,MDGA1,ADGRB1,TSC1,NTRK1,RAC1,POLDIP2,ICAM5,LRFN4,CLASP2,LRRC24,SLC9A1,PEAK1,SLIT1,MYO1C,WNT7A,SNAI1	c5_GO.Biological.Process
GOBP_POSITIVE_REGULATION_OF_EXTRACELLULAR_MATRIX_ASSEMBLY	0.0035319	0.0922408	0.431708	0.669971	1.8841	11	PHLDB1,SMAD3,TGFB1,CLASP1,SOX9,EMILIN1	c5_GO.Biological.Process	0.591463	0.859372	0.0713053	0.307547	0.904411	10	TGFB1,PHLDB1,CLASP2,EMILIN1,DAG1	c5_GO.Biological.Process
Transport of the SLBP independent Mature mRNA; datasource: reactome;	0.00356714	0.186918	0.431708	-0.447296	-1.81624	33	NUP54,NUP155,NUP210,SEH1L,NUP35,NUP43,NUP98,POM121C,NCBP2,ALYREF,NUP58,NUP133,NUP214,RAE1,TPR,EIF4E,NDC1,RANBP2,NUP37,NCBP1,NUP107	PathwayCommons11	0.0307647	0.572801	0.352488	-0.360495	-1.57716	33	NUP155,EIF4E,SEH1L,NUP35,NUP37,NUP210,NDC1,NUP54,TPR,NUP133,NUP153,NUP88,RAE1,NUP160,NXF1,ALYREF,NUP188,NUP62,NUP214,NCBP2,NUP205,NCBP1,NUP58	PathwayCommons11
GOBP_MORPHOGENESIS_OF_EMBRYONIC_EPITHELIUM	0.00358502	0.0929911	0.431708	0.310209	1.5696	118	ADM,IFT122,PLXNB2,PTK7,BMP4,TFAP2A,LMO4,TGFB1I1,TGFB1,STK4,RARA,CITED2,FZD2,PRICKLE1,TP63,ALDH1A3,ABL1,SOX9,GRHL3,DVL1,GRHL2,LUZP1,WNT7B,JAG2,KIF20B,SEMA4C,SEC24B,RARG,ARHGAP35,NOG,FGFR2,PTCH1,SALL4,SPINT1,SPINT2,PFN1,LAMA5,RDH10,STK3,MTHFR,TCTN1,GRSF1	c5_GO.Biological.Process	0.000142735	0.0158317	0.518848	0.323006	1.88318	120	DVL2,PTK7,CLUAP1,JAG2,CECR2,TFAP2A,PAX2,KAT2A,TGFB1,PTCH1,WNT7B,FZD1,PLXNB2,PFN1,ABL1,MKS1,ALDH1A3,RARG,SIX4,CASP3,WNT2B,GRHL2,RDH10,FZD2,OVOL2,VASP,KDM2B,SEMA4C,BMP4,CELSR1,MED12,WNT4,FUZ,SPINT2,LMO4,SCRIB,ST14,RET,TSC1,SEC24B,BMP7,HIF1A,FGFR2,FZD3,BBS4,SPINT1	c5_GO.Biological.Process
GOBP_NEGATIVE_REGULATION_OF_EPITHELIAL_CELL_PROLIFERATION	0.00358502	0.0929911	0.431708	0.310299	1.57005	118	MMRN2,NKX2-8,BMP4,CDKN1B,TGFB1,VDR,STK4,MIR15A,MIR16-1,DAB2IP,STK11,MIR29B1,SOX9,CAV2,MIR26A1,B4GALT1,SFN,FLCN,MCC,NGFR,ZEB1,AIMP1,CDC73,KLF9,MIR24-1,THBS1,FGFR2,PTCH1,NR2F2,NFIB,APOE,MIR98,IRF6,SOX2,MIR15B,IFT80,STK3,TGFBR1,NOTCH1,WDR13,MIR126,MIR152,TGFBR3,MED1,NF1,DUSP10,DLL4,MIR30E,WDR77,TGFB2,DLG1,MIR149,GATA3,MIR2355,IFT172,PPARD,SYNJ2BP,MIR193A,EPPK1,PHB2	c5_GO.Biological.Process	0.329588	0.732758	0.0988903	0.184423	1.07522	120	OVOL1,MIR149,MIR497,TGFB1,CAV1,NOTCH1,PTCH1,MIR15A,MIR16-1,ATP5F1A,IRF6,SOX2,MIR34A,MIR152,BMP4,MED1,WDR77,DAB2IP,NF1,ZEB1,CD109,KRIT1,STK11,FLCN,MIR29B1,NGFR,MIR193A,DLL4,DLG1,MMRN2,CAV2	c5_GO.Biological.Process
Glutamate.ionotropic.receptor.NMDA.type.subunits	0.00361922	0.260343	0.431708	0.899545	1.80202	4	GRIN2D,GRIN3B,GRIN1	HUGO.Genes.groups	0.752033	0.964184	0.0596037	0.360132	0.754538	4	GRIN3B,GRIN2D	HUGO.Genes.groups
WP_NEUROINFLAMMATION_AND_GLUTAMATERGIC_SIGNALING	0.00363032	0.132088	0.431708	0.328	1.62867	104	PLCB3,SLC38A2,TNFRSF1A,SMAD7,NSMF,SMAD3,GRIN2D,TGFB1,SRR,GRIN3B,JAK1,STAT6,IL1R1,GRIN1,IRS1,IL10RA,GLS,IL1B,FOS,DAO,CAMKK1,IL6R,TRPM4,PRKCG,MAPK3,PRKCA,GRIK4,PPP1CA,FGF2,DLAT,IL6ST,GRIK5,TGFBR1,SMAD2,PLCB2,SLC38A5,BDNF,CFL1,TGFBR3,IL1A,LRRC8E,CAMKK2,CREB1	c2_curated.Canonical.Pathways	0.693642	0.889507	0.0609039	-0.155009	-0.881419	99	BCL2,GRM2,STAT1,CAMK2B,SLC1A2,DLD,IL12A,ADCY1,CFL1,SLC1A1,DAO,CAMK2D,GRM4,SMAD2,PRKCA,NOS1,SLC1A3,IL4R,LRRC8A,IFNGR1,GLS,LRRC8C,LRRC8D,CALM1,PSAT1,GOT1,DISC1,CNTF,TGFBR3,PDHA1,SOCS3,TGFBR1,PRKCG,IL13RA1,SLC2A3,SMAD4,GRIN2C	c2_curated.Canonical.Pathways
GOBP_REGULATION_OF_ENDOTHELIAL_CELL_DIFFERENTIATION	0.00365092	0.0943793	0.431708	0.456165	1.77409	36	TNFRSF1A,MIR200C,BMP4,BTG1,JAG1,MIR99B,F11R,BMP6,VEZF1,IKBKB,ZEB1,ETV2,ADD1,MIR10A,IL1B,APOLD1	c5_GO.Biological.Process	0.259794	0.684216	0.120433	0.265226	1.1378	33	MIR200C,F11R,NOTCH1,MIR34A,ETV2,BMP4,MIR99B,ZEB1,MIR10A,ADD1,TNFRSF1A,ZDHHC21,BTG1,VHL,S1PR3,VEZF1,IKBKB	c5_GO.Biological.Process
GOBP_NCRNA_TRANSCRIPTION	0.00370353	0.095416	0.431708	0.315133	1.58904	116	EGFR,ZC3H4,BMP4,EGR1,NOP53,ELL,SNAPC4,SNAPC5,SMAD3,DDX5,SPIN1,TGFB1,RARA,MACROH2A1,NR3C1,SOX9,MRTFA,RELA,MYC,NFATC2,SREBF1,SPI1,NGFR,ERCC2,JUN,NR1H2,SIRT7,ZNF512B,TP53,ANG,FOS,GTF3C6,POU2F1,SRF,KLF5,NFIB,ELL2,FGF2,USPL1,POLR1G	c5_GO.Biological.Process	0.0107828	0.202784	0.38073	0.27126	1.56991	116	NR3C1,SNAPC2,SIRT7,SNAPC4,MRTFB,GTF3C6,PPARA,NFATC3,MACROH2A1,IPPK,ELL3,TGFB1,MYC,ANG,ZNF512B,GTF3C1,MEPCE,TP53,FOXA1,BMP4,POLR1G,RELA,FOS,DEDD,SMAD1,ERCC2,NGFR,ZNF143,YY1,ZC3H4,GATA2,NCOR2,GTF3C2,FGF2,SMAD6,HIF1A,SNAPC1,POLR1E,POLR2F,GNL3,NR1H2,RPAP2,GTF2H5	c5_GO.Biological.Process
GOBP_REGULATION_OF_CATABOLIC_PROCESS	0.00372113	0.0955278	0.431708	0.204841	1.3089	863	QRICH2,GABARAPL2,METTL1,BAD,GPR137,TIMP2,EEF1A1,TMEM9,CHFR,DEPP1,GABARAP,MIR192,EGFR,FBXL5,HAMP,SERBP1,AMER1,ATP6V1E2,KEAP1,NFE2L2,ATG14,SMAD7,ZFP36L2,ANXA2,CDKN1B,SESN1,CAPN1,TRIM65,RGP1,CIRBP,CPT1A,NOP53,SCARB1,PHF23,MET,TMEM259,MIRLET7A1,MIRLET7E,MIR125A,PML,SMAD3,RALB,PKP1,ABCA2,FOXK2,FKBP8,TGFB1I1,PPP1R3D,MOV10,SCFD1,MIR151A,PTK2,STX5,DAB2IP,DCP1A,PACSIN3,HNRNPA0,STK11,CLN3,PRICKLE1,FAF1,EXO…	c5_GO.Biological.Process	0.000340612	0.0275926	0.498493	0.18938	1.42927	872	RBX1,MCL1,GABARAP,PHF23,PSMC3,ZBTB7A,MIR192,CAPRIN1,ERCC4,TNRC6B,USP7,GSK3A,OAZ1,PRKAG1,MOV10,TBK1,TRIM8,BAD,GPR137,USP5,MIR149,GOLGA2,FZR1,ATP6V0C,SMAD7,ZFP36,UBXN1,AZIN1,SAMD4A,TMEM259,RNFT1,MIR195,MIR497,CLEC16A,ZFAND2A,ARNT,CHFR,FKBP8,ARL2,DDA1,CSDE1,SUMO2,PPARA,USP19,CIRBP,TRIB3,FAM83D,RGP1,CLN3,HAX1,BAX,CHMP6,GGA3,HTRA2,TMEM9,BANP,LRP1,CAV1,CSNK1A1,MARCHF7,PSMD3,DCP1A,PAN2,RBM8A,EIF6,PSME3I…	c5_GO.Biological.Process
Transcription of E2F targets under negative control by p107 (RBL1) and p130 (RBL2) in complex with HDAC1; datasource: reactome;	0.00372233	0.188462	0.431708	-0.556371	-1.82151	16	E2F1,RBL1,CDK1,MYBL2,TFDP1	PathwayCommons11	0.0190002	0.572801	0.352488	-0.504156	-1.72361	16	TFDP2,LIN54,CDK1,TFDP1,E2F5,CCNA2,RBL1,RBBP4	PathwayCommons11
ErbB1 downstream signaling; datasource: pid;	0.00372739	0.188462	0.431708	0.323906	1.58681	96	BAD,CAPN2,MAPKAP1,EGFR,EGR1,EPS8,RPS6KA3,PRKCD,MAPK8,YWHAZ,RIN1,NRAS,SLC9A1,NCKAP1,KRAS,SFN,MAPK9,RICTOR,PRKCZ,RAB5A,JUN,FOS,ARPC2,CALM3,PPP5C,SRF,RPS6KA4,WASL,MAPK3,PRKCA,YWHAG,ZFP36,YWHAQ,PDPK1,ARPC4,ACTR3,CDC42,MLST8,RAF1	PathwayCommons11	0.464819	0.873225	0.08654	-0.174635	-0.992431	98	EGFR,RPS6,PLD1,STAT1,PPP2R2A,BAIAP2,YWHAG,SH2D2A,CAPN2,SOS1,EPS8,PIK3CA,DIAPH3,SFN,ABI1,DUSP6,PRKCA,WASF2,ARPC4,ELK1,JUN,PIK3CB,GRB2,CALM1	PathwayCommons11
GOBP_ALPHA_BETA_T_CELL_ACTIVATION	0.00373293	0.0955278	0.431708	0.324323	1.62768	110	CD247,MEN1,FOSL2,SMAD7,AP3D1,STOML2,ARG2,BCL6,FUT7,RARA,JAK1,SHB,ABL1,KMT2A,RUNX1,STAT6,JUNB,NFKBIZ,FOXP1,NCKAP1L,FOXP3,PRKCZ,ZBTB7B,TNFSF4,IL6R,NKG7	c5_GO.Biological.Process	0.564378	0.849293	0.0764767	-0.163403	-0.949186	118	BCL6,BCL2,FOSL2,FOXP3,IRF1,LEF1,PRR7,MIR21,KLHL25,RSAD2,IL18R1,IL18,IL12A,ATP7A,GLI3	c5_GO.Biological.Process
GOBP_REGULATION_OF_DEFENSE_RESPONSE	0.0037501	0.0956464	0.431708	0.22027	1.3511	522	MMRN2,NT5C2,HEXIM1,TRAFD1,TNFRSF1A,CACTIN,HAMP,LYN,NFE2L2,MIR141,PTPN6,FLOT2,ZDHHC5,INAVA,ARG2,TRIM65,NR1D1,NOP53,CARD9,BCL6,NT5E,SH2D1A,SMAD3,FUT7,NLRP1,MGLL,TGFB1,LACC1,ISG15,MIR15A,MIR16-1,DAB2IP,RPS6KA3,KLRD1,CEBPB,PRKCD,YTHDF2,SEC14L1,MAPK8,YWHAZ,UBE2K,EMILIN1,MIR26A1,RELA,IKBKB,ZDHHC1,NFKBIA,SHARPIN,NLRX1,PTPN1,TNFAIP8L2,IL1R1,RICTOR,NFKBIZ,NOD1,RHBDF2,C2CD4A,SPI1,FOXP1,TMEM126A,MAVS,FOXP3,…	c5_GO.Biological.Process	0.0737018	0.436322	0.213928	0.165653	1.19042	505	IRF3,SERPINB9,MARK4,RNF26,MIR141,PTPN6,ISG15,KARS1,MKRN2,NT5C2,TBK1,MIR149,LACC1,TRIM41,ZFP36,DDX3X,SPATA2,CARD9,CEBPB,MGLL,MIR195,ARNT,PPARA,RBM14,LGR4,FUT7,NECTIN2,HEXIM1,NAGLU,TGFB1,CAV1,CSNK1A1,YWHAZ,PDE2A,RABGEF1,ZDHHC1,SFPQ,MIR15A,MIR16-1,PRKCE,ZCCHC3,HSPD1,A2M,INAVA,MIR657,NR1H3,MIR6869,ASH1L,HSP90AA1,VAV1,MDK,WFDC1,EXTL3,HAMP,CDC37,GGT1,PSMA1,DCST1,SMPDL3B,RASGRP1,CREBBP,MIR26B,TYRO3,CPTP…	c5_GO.Biological.Process
REACTOME_C_TYPE_LECTIN_RECEPTORS_CLRS	0.00378703	0.133784	0.431708	0.322896	1.6249	107	LYN,CARD9,PSMB7,UBE2M,PRKCD,UBE2V1,UBC,NRAS,MUC12,MUC17,MUC3A,RELA,IKBKB,NFATC2,NFKBIA,KRAS,PPP3CA,ITPR3,ICAM3,PSMB2,IL1B,PSMD4,CASP8,UBE2D1,PSMD13,MUC1,PSMC2,NFATC1,PSMD9,ITPR2,PSMA5,PDPK1,SYK,PSMC6,PSMA6,PSMB10,RAF1,EP300,MAP3K14,PSMA4,UBE2D2	c2_curated.Canonical.Pathways	0.00431588	0.108126	0.407018	0.300827	1.69866	105	PSMC3,RELB,PSMB6,CARD9,NRAS,NFATC3,PSMD8,PSMD3,ICAM3,PSMB10,PSME3,CARD11,NFKB2,PSMA1,FCER1G,UBC,CREBBP,ITPR2,RELA,MUC12,MUC17,MUC3A,PRKCD,PSMA7,UBE2V1,PSMD11,PSME4,PSMD4,RAF1,EP300,MALT1,SKP1,CDC34,PSMB1,PSMB5,MUC1,PSMB4,PSMD1,TAB2,TAB1	c2_curated.Canonical.Pathways
WP_TGF_BETA_RECEPTOR_SIGNALING_IN_SKELETAL_DYSPLASIAS	0.00378771	0.133784	0.431708	0.427906	1.78744	43	SMAD7,BMP4,SKIL,SMAD3,ITGB6,TGFB1,JAK1,TGIF1,MAPK9,JUN,FOS,RUNX2,NOG,THBS1,MAPK3,ENG,TGFBR1,SMAD2,FKBP1A,LEFTY1,EP300,TGFBR3	c2_curated.Canonical.Pathways	0.0735586	0.446665	0.234393	0.291637	1.37111	46	INHBA,SMAD7,TGFB1,LIF,FKBP1A,CREBBP,TGIF1,BMP4,FOS,MAPK9,SMAD1,TGFBR2,EP300,MAPK3,SMAD6,SKIL,NOG,LEFTY1,SMAD5,LTBP3,LTBP1,ADAMTS10,ZNF423,FST	c2_curated.Canonical.Pathways
GOBP_B_CELL_RECEPTOR_SIGNALING_PATHWAY	0.00378771	0.0959211	0.431708	0.431974	1.73561	40	PIK3CD,LYN,PTPN6,PRKCH,SH2B2,ABL1,CD22,NFATC2,NFKBIA,NFKBIZ,FOXP1,NCKAP1L,BAX,BCAR1	c5_GO.Biological.Process	0.758	0.92534	0.0584693	-0.17914	-0.812184	39	BCL2,PRKCH,MIR19A,MIR18A,SOS1,BMX	c5_GO.Biological.Process
GOBP_HORMONE_BIOSYNTHETIC_PROCESS	0.00378771	0.0959211	0.431708	0.431494	1.73368	40	CYP27B1,ADM,H6PD,EGR1,IGF1R,BMP6,STARD3,NR3C1,ATP1A1,DKK3,LHB,DGKQ,CACNA1H	c5_GO.Biological.Process	0.50501	0.821232	0.0787114	-0.217067	-0.970487	37	DUOX1,HSD17B11,IGF1R,SRD5A3,HSD17B12,FDX1,AKR1B1,DIO1	c5_GO.Biological.Process
GOBP_ORGANISM_EMERGENCE_FROM_PROTECTIVE_STRUCTURE	0.00380119	0.0959211	0.431708	0.597165	1.86138	16	TBL1XR1,BCOR,SLC35E2B,STMN3	c5_GO.Biological.Process	0.75102	0.922575	0.0598603	0.21673	0.767393	18	SLC25A34,ZBED6,CCDC24	c5_GO.Biological.Process
WP_THERMOGENESIS	0.00380541	0.133784	0.431708	0.34403	1.64072	81	SMARCD2,ACSL4,ACTB,BMP8B,AKT1S1,CPT1A,MGLL,SOS2,RPS6KA3,GNAS,NRAS,KRAS,ADCY9,ARID1B,RPS6KA2,ARID1A,MAPK11,MAPK12,PRKAG1,RPTOR,SMARCC1,ADCY10,PNPLA2,KDM3B,ADCY7,SLC25A29,MAPK13,RHEB,SMARCC2,MLST8,CPT1C,RPS6KB2,ZNF516,CREB1,SMARCD1,TSC2,CREB3L4	c2_curated.Canonical.Pathways	0.0239312	0.275986	0.352488	0.281646	1.54577	87	PRKAG1,RPS6KB2,ADCY3,RPS6KB1,MGLL,NRAS,DPF1,CREB5,ACTB,RPTOR,ADCY10,MAPK11,MAPK12,ADCY5,GNAS,RPS6KA2,FGF21,SMARCE1,ADCY7,ADCY6,PNPLA2,MAPK14,SMARCD2,PLIN1,ACTL6B,SMARCA2,MLST8,AKT1S1,TSC1,CPT1C,SLC25A29,FRS2,PRKAB2,CPT2	c2_curated.Canonical.Pathways
GOBP_VIRAL_GENE_EXPRESSION	0.00381336	0.0959211	0.431708	0.351644	1.67173	84	HEXIM1,USF2,PARP10,SP1,TFAP4,HMGA2,USF1,MGAT1,ST6GALNAC2,ST6GALNAC4,TRIM8,MAN1B1,CSDE1,JUN,UBP1,PTBP1,EIF3A,CCNT2,EIF3B,TRIM11,ATG5,INPP5K,DHX9,FUT8,ZFP36,TRIM13,PARP16,IFITM3,MID2,EP300,PRMT1,ST3GAL2,RSF1,TARBP2,MGAT4A,GALNT1,DENR,GSK3A	c5_GO.Biological.Process	0.242063	0.666256	0.122679	0.210519	1.13635	85	PSMC3,PRMT1,GSK3A,TRIM8,ZFP36,CSDE1,HEXIM1,EIF3G,USF1,CCNT1,CSNK1A1,RSF1	c5_GO.Biological.Process
WP_RAS_SIGNALING	0.00381837	0.133784	0.431708	0.300092	1.57374	138	BAD,BUB1B-PAK6,PAK6,GNG8,EGFR,PIK3CD,RAC3,MAPK10,IGF1R,MET,RALB,STK4,SOS2,ABL1,MAPK8,RIN1,NRAS,RELA,IKBKB,KRAS,MAPK9,GRIN1,SHC1,NGFR,RAB5A,PLAAT3,GNB1,CALM3,PDGFRA,AKT2,RASSF5,GNB5,PRKCG,FGFR2,NTRK1,MAPK3,PRKCA,GNG7,PIK3R3,ARF6,RRAS,LAT,PLA2G4B,JMJD7-PLA2G4B,PAK5,CDC42,PLA2G2C,GNB2,RRAS2,GNG3,RAF1,PLA2G4E,PIK3R2,CALML3,NF1	c2_curated.Canonical.Pathways	0.00293229	0.0846783	0.431708	0.265971	1.5686	143	PLA2G4C,PLA2G4D,GNG7,GNG12,BAD,SHC1,LAT,NRAS,RAB5C,RASGRP2,RAB5B,RASAL3,ABL1,PIK3R2,GNB2,FGFR4,GNG3,PLAAT3,RASGRP4,RAB5A,BUB1B-PAK6,PAK6,RASGRP1,AKT2,RRAS,NF1,RELA,RRAS2,CDC42,PTPN11,MAPK9,EPHA2,BRAP,NGFR,TTBK1,RALGDS,HTR7,RAF1,GAB2,FOXO4,RIN1,NTRK1,GNG10,GNB5,MAPK3,RAC1,FGFR2,KSR1,ETS2,GNB3,FGFR3	c2_curated.Canonical.Pathways
GOBP_BEHAVIOR	0.00382376	0.0959211	0.431708	0.236046	1.40994	397	KCNK4,APRT,PAK6,CAPN2,GNG8,EGFR,HOXA1,ADM2,ID2,ADAM11,HOXB8,DKK1,NR4A2,EGR1,NR1D1,CPT1A,CHD8,KLK8,RMI1,EPS8,ABCA2,CSF2,GRIN2D,MKKS,MAN2B1,MBD5,FOXB1,PPP1R1B,SNCG,CLN3,P2RX4,ALDH1A3,ABL1,NR3C1,TTC36,KMT2A,CACNB4,THRB,DVL1,DLG4,VPS54,KRAS,MTA1,NKX2-1,GRIN1,SOD2,CIC,C12orf57,ITPR3,ARRDC3,PRKCZ,BGLAP,GLS,TRMT1L,EFNB3,TP53,UBE2Q1,ABCA7,RPTOR,PPP1R9B,RAPGEF3,FOS,EPHA4,MEIS1,DAB1,GPR176,MDK,P2RX1,ATXN1L…	c5_GO.Biological.Process	0.00103715	0.0573512	0.45506	0.218594	1.53434	411	NR3C1,PAFAH1B1,ADM2,GNG7,ADAM11,JPH4,KCNK4,ADCY3,MAFG,ADNP,GPR157,RPS6KB1,HOXB8,PPARA,GPR176,CLN3,C12orf57,SOD2,NAGLU,HTRA2,HTR1D,PRKAR1B,KAT2A,PEX13,SEPTIN5,CNP,ZNF385A,MAN2B1,ATXN1L,RPTOR,PRKCE,CSNK1E,UBE2Q1,EPHA4,HEXB,APRT,ABL1,PTGDS,ABCA7,AGRP,HOXA1,B4GALT2,NRXN2,SPTBN4,ALDH1A3,PCM1,NTF3,MDK,CASP3,MKKS,EFNB3,TP53,ADCY5,ZDHHC8,BBS1,PBX3,PAK6,BBS2,NEUROD2,FBXL20,DERL2,RAPGEF3,TPGS1,DLG4,NTF4,AR…	c5_GO.Biological.Process
GOBP_NEGATIVE_REGULATION_OF_GROWTH	0.00384534	0.0961461	0.431708	0.287034	1.55282	177	CYP27B1,SEMA4B,BTG1,CDKN1B,BCL6,SEMA3B,PML,SMAD3,CAPRIN2,ST7L,CDHR2,TGFB1,RTN4R,SPAG9,STK4,CITED2,STK11,BRCA1,ULK1,SOCS2,RACK1,SERTAD2,RGS2,FOXP1,MSX1,MAPK11,SEMA3A,WWC3,ENO1,TP53,SEMA4C,PPP1R9B,NDRG3,PTK6,MT1E,BMPR2,WWC1,RAI1,ARHGAP4,MIR873,NOG,MIR200B,CRYAB,PTCH1,NRP1,DCUN1D3,ACVR1B,SIPA1,TRIM46,MT2A,WNT11,PPT1,PRDM11,STK3,ST20,ING4,PLXNA3,TOMM70	c5_GO.Biological.Process	0.15342	0.583789	0.152145	0.187732	1.18265	183	SIPA1,GSK3A,INHBA,ST7L,NME6,DDX3X,BRCA1,NAIF1,PPARA,SPHK2,MAG,TGFB1,STC2,CDKN2AIP,PTCH1,BCL11A,MAPK11,WFDC1,CCAR2,TP53,ING5,ADAM15,BST2,RAI1,SEMA4C,BBS2,OSGIN1,CDKN2D,ST20,STK11,WNT11,NDUFA13,CDH1,NDUFS3,MECP2,PTK6,IP6K2,ULK1,SMARCA2,YY1,CCDC85B,SOCS2,CDKL3,PPP2CA,DACT3,CYP27B1,PLAC8,HIF1A,RNF6,MIR200B,PRDM11,DCUN1D3,TOMM70,FHL1,ACVR1B,FGFR3,BMPR2,MSX1,CAPRIN2,SEMA3B,NOG,SEMA6C,SLIT1,RB1,BTG1,TP5…	c5_GO.Biological.Process
GOBP_IMMUNE_EFFECTOR_PROCESS	0.00387635	0.0966047	0.431708	0.244345	1.44015	354	AXL,MEN1,SNAP23,MYO18A,PIK3CD,LYN,PLEC,SPON2,SMAD7,ERCC1,PTPN6,INAVA,CARD9,BCL6,JAG1,SH2D1A,CLCF1,FUT7,DYSF,TGFB1,PTK2,LACC1,RARA,JAK1,SHLD1,KLRD1,EXOSC3,SHB,PRKCD,KMT5B,ABL1,KMT2E,KMT2A,AIRE,KMT5C,STAT6,CD22,CD27,CORO1A,JUNB,NLRX1,PRDX1,IL1R1,FOXJ1,NFKBIZ,NOD1,TNFSF13,STXBP1,SPI1,APOA2,FOXP1,NCKAP1L,MAVS,FOXP3,IL4I1,PRKCZ,DNAJB9,RNF8,TRIL,EVPL,ZBTB7B,TP53,NECTIN2,ANKRD17,TNFSF4,IL1B,UNC13D,MDK,P…	c5_GO.Biological.Process	0.0659537	0.425862	0.234393	0.176212	1.21638	350	AXL,RELB,SERPINB9,TMBIM6,PKN1,TNFSF13,PTPN6,KARS1,LACC1,SMAD7,ZBTB7B,LAT,CARD9,TCIRG1,FUT7,NECTIN2,SPON2,LOXL3,CEBPG,SPHK2,LRP1,STAT6,TGFB1,C17orf99,ITGB2,PLEKHM2,RNF168,RABGEF1,PRKCE,HSPD1,A2M,NOS2,INAVA,MEN1,ABL1,PTGDS,SWAP70,XBP1,VAV1,MDK,JAK3,TP53,KIF5B,ZFPM1,TUBB4B,RAET1L,NCKAP1L,BST2,FCER1G,ERCC1,NDST2,RASGRP1,SLC11A1,WAS,C1QBP,JAGN1,TYROBP,NFKBID,ULBP2,PRKCD,STXBP2,CD47,RIGI,STAT5B,RNF8,DN…	c5_GO.Biological.Process
REACTOME_FORMATION_OF_THE_CORNIFIED_ENVELOPE	0.00388971	0.133806	0.431708	0.465423	1.83459	34	KRT18,KRT8,CAPN1,KLK8,PKP1,KRT7,KRT86,PCSK6,DSC2,CAPNS1,PKP2,EVPL,KRT17,PKP3,KRT15,KRT19	c2_curated.Canonical.Pathways	0.0313847	0.313267	0.321776	0.354786	1.55904	37	KAZN,PCSK6,KRT15,KRT19,KRT18,KRT8,CAPN1,KLK12,CAPNS1,DSG2,PKP4,DSC3,PKP3,ST14,DSC2,KLK8,PPL,EVPL,DSP,KRT16,LORICRIN	c2_curated.Canonical.Pathways
REACTOME_KERATINIZATION	0.00388971	0.133806	0.431708	0.465423	1.83459	34	KRT18,KRT8,CAPN1,KLK8,PKP1,KRT7,KRT86,PCSK6,DSC2,CAPNS1,PKP2,EVPL,KRT17,PKP3,KRT15,KRT19	c2_curated.Canonical.Pathways	0.0225907	0.267902	0.352488	0.337411	1.57612	45	KAZN,PCSK6,KRT15,KRT19,KRT18,KRT8,CAPN1,KLK12,CAPNS1,DSG2,PKP4,DSC3,PKP3,ST14,DSC2,KLK8,PPL,EVPL,DSP,KRT16,LORICRIN	c2_curated.Canonical.Pathways
GOBP_CD4_POSITIVE_ALPHA_BETA_T_CELL_DIFFERENTIATION	0.00392027	0.0973809	0.407018	0.388677	1.73644	63	MEN1,SMAD7,BCL6,FUT7,RARA,JAK1,SHB,KMT2A,RUNX1,STAT6,JUNB,NFKBIZ,FOXP1,NCKAP1L,FOXP3,PRKCZ,ZBTB7B,TNFSF4,IL6R	c5_GO.Biological.Process	0.57393	0.854085	0.0706196	0.184489	0.94696	66	RELB,SMAD7,ZBTB7B,FUT7,LOXL3,STAT6,MEN1,JAK3,ZFPM1,NCKAP1L,NFKBID,SOCS1,MALT1,BRAF,STAT4,SHB,PRKCZ,LGALS9,CBFB,NLRP3,MTOR,NFKBIZ,KMT2A,ENTPD7,IL6R,RUNX1,NKX2-3,RORA,BCL3,RC3H1,RUNX3,RC3H2,ZC3H12A	c5_GO.Biological.Process
Positive regulation of (Transcription of SOCS by STAT dimer) in JAK STAT pathway ( JAK-STAT pathway and regulation pathway Diagram ); datasource: inoh;	0.0039297	0.192732	0.407018	0.296481	1.56471	149	PAK6,MAP4K2,EGFR,PRKCH,MAPK10,IGF1R,MET,BMPR1B,CDK3,PTK2,RPS6KA3,JAK1,ACVR2B,PRKCD,MAPK8,GRK6,STAT6,IKBKB,MAPK9,RPS6KA2,NGFR,PLK3,MAPK11,MAPK12,PRKCZ,PRKAG1,PRKAR1A,MAP3K10,MKNK1,BMPR2,PDGFRA,AKT2,GRK4,PRKCG,FGFR2,RIPK1,NTRK1,MAPK3,PRKCA,PRKCE,ACVR1B,MAP3K11,PDPK1,SYK,MAPK13,ACVR2A,TGFBR1,PAK5,CSNK1E,RAF1,PRKCI,MAP3K14,RPS6KB2,CSNK1D,TEC,MAP2K7,MAP3K12	PathwayCommons11	0.0620438	0.572801	0.245042	0.212984	1.27683	156	MAP2K7,WEE1,MAP3K11,MAPKAPK5,GSK3A,CDK3,PRKAG1,RPS6KB2,BMPR1B,RPS6KB1,PRKAR1B,STAT6,ACVR2B,CSNK1A1,PRKCE,CSNK1E,CDK2,MAP4K2,MAPK11,MAPK12,JAK3,FGFR4,RPS6KA2,CAMK2G,PAK6,AKT2,PRKCD,MAPK9,MAPK14,STAT5A,STAT5B,IRAK1,TGFBR2,NGFR,RAF1,CSNK1G2,GRK6,LTK,BRAF,NTRK1,IKBKE,STAT4,MAPK3,FGFR2,PRKCZ,PRKAB2,GRK4,BTK,MAP2K4,MAP3K5,ACVR1B,FGFR3,BMPR2,GRK2,IRAK2,RIPK1,MAP4K3,MTOR,CDK9,CSNK1D	PathwayCommons11
Olfactory Signaling Pathway; datasource: reactome;	0.0039456	0.192732	0.407018	-0.477664	-1.80908	25	OR2B8P,OR52N1,OR51B2,OR51B4,OR52E8,OR52E6,OR52N5,OR52H1,OR51I1,OR51B5,GNGT1	PathwayCommons11	0.764479	0.954091	0.0564118	0.201956	0.788739	24	OR1F2P,OR1F1,GNAL,REEP4,REEP3,REEP6,REEP2,GNB1,REEP5,GNGT1,OR51B5,OR51I1,OR52H1,OR52N5,OR52E6,OR52E8,OR51B4,OR51B2,OR52N1,OR2AE1,REEP1	PathwayCommons11
GOBP_STEM_CELL_PROLIFERATION	0.00397875	0.0984837	0.407018	0.343128	1.66553	92	MECOM,HMGA2,HOXA3,NF2,TGFB1,MIR16-1,TP63,SHB,YTHDF2,MIR29B1,SOX9,RUNX1,WNT7B,SFN,OSR2,KITLG,ERCC2,TSC22D1,MIR320E,TP53,ZFP36L1,HOXB4,RUNX2,RARG,ATXN1L,PTCH1,PIM1,ETV6,NFIB,FGF2,WNT11,MIR320B2,IRF6,TGFBR1,NOTCH1,MIR181A2,NF1,YAP1,PDCD2,EIF2AK2	c5_GO.Biological.Process	0.109848	0.521302	0.184706	0.220546	1.25337	104	OVOL1,CTC1,SART3,ELL3,HOXA3,TGFB1,NOTCH1,SOX18,PTCH1,ATXN1L,WNT7B,MIR16-1,MIR320E,RARB,CITED1,RARG,IRF6,WNT2B,TP53,TIAL1,OVOL2,N4BP2L2,NF1,CD109,WNT11,YJEFN3,MIR29B1,ERCC2,TGFBR2	c5_GO.Biological.Process
GOBP_POSITIVE_REGULATION_OF_LIPID_METABOLIC_PROCESS	0.00400622	0.0984837	0.407018	0.333084	1.63165	96	ADM,CAPN2,CTDNEP1,ATG14,IGF1R,NR1D1,CPT1A,SCARB1,TGFB1,BMP6,PRKCD,MIR29B1,SREBF1,APOA2,IRS1,NR1H2,RPTOR,ABCD1,KAT5,IL1B,AGAP2,DGKZ,PNPLA2,PDGFRA,SIRT3,AKT2,MID1IP1,PRKCE,FGF2,APOE,RDH10,MLST8,SLC27A1,IL1A,CREBL2,CREB1	c5_GO.Biological.Process	0.103383	0.507344	0.190023	0.226651	1.27797	98	CTDNEP1,PPARA,CREBL2,ABCG1,SPHK2,TGFB1,RPTOR,PRKCE,NR1H3,SCAP,ABHD6,DGKZ,RDH10,FGF21,AKT2,MLYCD,PRKCD,ADORA1,AMBRA1,SLC27A1,MIR29B1,WNT4,PNPLA2,OGT,MLST8,MFSD2A,MTLN,FGF2,LDLRAP1,ABCD1,KAT5,NR1H2,FGFR3	c5_GO.Biological.Process
TH17.Differentiation	0.00400999	0.019457	0.407018	0.511643	1.83186	26	SMAD3,TGFB1,JAK1,IL1R1,FOXP3,MAPK11,MAPK12,IL1B,IL6R,IL6ST,TGFBR1,SMAD2	NanoString_Genes	0.670732	0.785908	0.0650878	0.220996	0.848517	24	TGFB1,MAPK11,MAPK12,JAK3,MAPK14,TGFBR2,HIF1A,IL6ST,MTOR	NanoString_Genes
Prostate.Cancer	0.00401321	0.019457	0.407018	0.383232	1.68638	64	BAD,EGFR,PIK3CD,CDKN1B,IGF1R,PDGFA,SOS2,NRAS,RELA,IKBKB,NFKBIA,KRAS,MDM2,ZEB1,TP53,CCND1,CMTM4,PDGFRA,AKT2,TCF7,FGFR2,MAPK3,PIK3R3,HSP90B1,RAF1,EP300,PIK3R2,CREB1	NanoString_Genes	0.602386	0.784528	0.0692836	0.179914	0.926349	70	CCND1,BAD,NRAS,PDGFC,CREB5,CDK2,PIK3R2,TP53,CREBBP,AKT2,RELA,ZEB1,E2F1,RAF1,EP300,BRAF,MAPK3,CASP9,FGFR2,PDGFA	NanoString_Genes
X7TM.orphan.receptors	0.00401458	0.270734	0.407018	0.935365	1.69283	3	GPR137,GPR107	HUGO.Genes.groups	0.00207862	0.171886	0.431708	0.879194	1.84206	4	GPR137,GPR157,GPR143,GPR107	HUGO.Genes.groups
GOBP_CELLULAR_RESPONSE_TO_GROWTH_HORMONE_STIMULUS	0.00401632	0.0984837	0.407018	0.591633	1.88582	17	LYN,PTK2,MBD5,JAK1,SOCS2,STAT6,PTPN1,PXN	c5_GO.Biological.Process	0.485944	0.813032	0.0808589	0.256977	0.977009	21	STAT6,JAK3,STAT5A,STAT5B,SOCS2,PXN	c5_GO.Biological.Process
GOBP_POSITIVE_REGULATION_OF_KERATINOCYTE_DIFFERENTIATION	0.00401632	0.0984837	0.407018	0.590822	1.88324	17	CYP27B1,PRKCH,ETV4,VDR,MACROH2A1,NCOA3,NME2,NOTCH1,MED1,FOXC1,OVOL2,NUMA1	c5_GO.Biological.Process	0.0403147	0.357454	0.321776	0.494635	1.63301	14	ETV4,MACROH2A1,NOTCH1,OVOL2,MED1,FOXC1,CYP27B1,VDR,NME2	c5_GO.Biological.Process
TGF.beta.Signaling	0.00402558	0.019457	0.407018	0.390327	1.68509	60	MEN1,HAMP,FSTL3,ID2,SP1,BMP4,SMAD3,BMPR1B,TGFB1,BMP6,UBC,MYC,JUNB,NOG,THBS1,MAPK3,ACVR1B,ACVR2A,TGFBR1,SMAD2,LEFTY1,EP300	NanoString_Genes	0.00928598	0.146332	0.38073	0.328406	1.62154	59	RBX1,INHBA,BMPR1B,RPS6KB1,TGFB1,MYC,MEN1,AMH,HAMP,UBC,CREBBP,BMP4,FSTL3,TGFBR2,EP300,RGMB,SKP1,BMP7,MAPK3,LRRC32,E2F4,ACVR1B,NOG,LEFTY1,SMAD5,TGFB3,LTBP1,CUL1,ID4	NanoString_Genes
HALLMARK_IL2_STAT5_SIGNALING	0.00404804	0.0819569	0.407018	0.28545	1.50376	154	AHNAK,TNFRSF18,TRAF1,SLC1A5,PLEC,ANXA4,NOP2,PRKCH,CAPN3,IGF1R,NT5E,CSF2,ETV4,GABARAPL1,IKZF4,P2RX4,RHOH,SOCS2,MYC,DHRS3,SPRY4,NFKBIZ,LCLAT1,ECM1,NDRG1,CSF1,IL10RA,FAH,GPX4,NCOA3,BMPR2,POU2F1,SNX14,MUC1,HIPK2,PTCH1,NRP1,PIM1,CCND2,CKAP4,HOPX,TNFRSF4,HUWE1,IRF6,ETFBKMT,ENO3	h.Hallmark.Gene.Sets	0.568085	0.836968	0.0756946	-0.157591	-0.953095	144	NCS1,BCL2,PRKCH,IGF2R,SMPDL3A,ARL4A,CDC6,IGF1R,BHLHE40,PIM1,PLSCR1,TNFSF10,IL1RL1,IL18R1,TIAM1,AHNAK,CD48,CCNE1,PTGER2,MAFF,CISH,PHTF2,PTRH2,IL4R,HK2,SLC29A2,AMACR,TWSG1,FURIN,IFNGR1,RABGAP1L,LRRC8C	h.Hallmark.Gene.Sets
GOBP_REGULATION_OF_CELL_PROLIFERATION_INVOLVED_IN_KIDNEY_DEVELOPMENT	0.00404855	0.0989558	0.407018	0.645593	1.87487	13	BMP4,EGR1,PDGFA,MIR125A,CFLAR,MYC,FLCN,IL6R	c5_GO.Biological.Process	0.00228505	0.0944988	0.431708	0.606543	1.96283	13	MYC,BMP4,MIR125A,FLCN,BMP7,PDGFA,CFLAR,IL6R,WT1	c5_GO.Biological.Process
REACTOME_SIGNALING_BY_INTERLEUKINS	0.00405072	0.13809	0.407018	0.245526	1.45066	329	PTPN18,PIK3CD,TNFRSF1A,LYN,PTPN6,ANXA2,LCN2,MAPK10,PTPN13,IL11,BCL6,CLCF1,SMAD3,CSF2,CAPZA1,TGFB1,AIP,SOS2,RPS6KA3,JAK1,PSMB7,TALDO1,UBE2V1,MAPK8,YWHAZ,SNRPA1,SOCS2,UBC,STAT6,RELA,IKBKB,MYC,NFKBIA,MCL1,JUNB,NLRX1,MAPK9,IL11RA,RPS6KA2,IL1R1,SOD2,NOD1,SHC1,NKIRAS1,MAPK11,ZEB1,JUN,IRS1,CSF1,CSF3R,IL10RA,STX1A,TP53,PSMB2,CCND1,CNN2,IL1B,FOS,PSMD4,HNRNPA2B1,CASP8,PSMD13,POU2F1,IL6R,PELI2,N4BP1,MUC1,PS…	c2_curated.Canonical.Pathways	0.0490909	0.406551	0.276501	0.193489	1.29845	325	RBX1,MAP2K7,MCL1,PSMC3,CCND1,NKIRAS2,PTPN9,PTPN6,PSMB6,CAPZA1,STX3,TBK1,SHC1,SIGIRR,IL11,SOD2,MMP2,SNRPA1,STAT6,TGFB1,PSMD8,PTPN7,PSMD3,ITGB2,CD4,YWHAZ,PSMB10,MYC,LIF,NOS2,PIK3R2,PSME3,CNN2,MAPK11,HSP90AA1,VAV1,NFKB2,JAK3,CASP3,SOX2,TP53,IL17RC,PSMA1,RPS6KA2,ARF1,UBC,RELA,TXLNA,ZEB1,FOS,PSMA7,STXBP2,INPPL1,UBE2V1,CDC42,PSMD11,PSME4,PTPN11,MAPK9,HSPA8,PSMD4,PTPN14,SOCS1,MAPK14,STAT5A,STAT5B,IRAK1,…	c2_curated.Canonical.Pathways
Circadian Clock; datasource: reactome;	0.00405565	0.193445	0.407018	0.396612	1.70743	52	TBL1XR1,NRIP1,NCOA6,NR1D1,BHLHE41,CHD9,NR3C1,PER2,UBC,RXRA,RAI1,NCOA2,PPP1CA,CARM1,CSNK1E,EP300,MED1,CSNK1D,CREB1,RBM4,PER1,SIRT1,NPAS2,CLOCK,CREBBP,CRY1	PathwayCommons11	0.30127	0.806573	0.102449	0.226234	1.09171	52	NR3C1,PPARA,RBM4,CSNK1E,HELZ2,UBC,RAI1,CREBBP,MED1,USP46,EP300,CRY2,SKP1,NCOA1,HIF1A,CRTC2	PathwayCommons11
GOBP_CARDIAC_VENTRICLE_MORPHOGENESIS	0.00408338	0.0992593	0.407018	0.406356	1.74287	50	SMAD7,PPP1R13L,TNNT2,BMP4,JAG1,TGFB1,GRHL2,TNNI3,MYBPC3,PKP2,NOG,FGFR2,TPM1,ENG,TGFBR1,NOTCH1,FKBP1A,TGFBR3,MED1,FOXC1,ZFPM2,HEY1,DLL4,NAGLU,TGFB2,GSK3A,MYL3,GATA3	c5_GO.Biological.Process	0.0358652	0.337509	0.321776	0.306176	1.50135	55	GSK3A,SMAD7,FOXC2,NAGLU,TGFB1,NOTCH1,FKBP1A,GRHL2,HEG1,PPP1R13L,BMP4,MED1,FOXC1,TGFBR2,DLL4,TNNT2,CPE,MYL3,NKX2-5,HIF1A,FGFR2	c5_GO.Biological.Process
PID_TAP63_PATHWAY	0.00409711	0.138424	0.407018	0.403359	1.71254	47	SP1,FLOT2,JAG1,PML,VDR,TP63,PRKCD,ABL1,SPATA18,TFAP2C,TRAF4,IKBKB,DHRS3,MDM2,BAX,EVPL	c2_curated.Canonical.Pathways	0.807229	0.929038	0.0557104	0.167091	0.795376	49	OGG1,BAX,ITGB4,ABL1,DST,TRAF4,PRKCD,FLOT2,SSRP1,EP300,ITGA3,TP53I3	c2_curated.Canonical.Pathways
GOBP_TOLL_LIKE_RECEPTOR_9_SIGNALING_PATHWAY	0.00410178	0.0992593	0.407018	-0.578889	-1.8708	15	RSAD2,HMGB1,HAVCR2,RTN4,SLC15A4,EPG5,GRAMD4,TNIP2	c5_GO.Biological.Process	0.266798	0.685647	0.115734	-0.34976	-1.14357	14	RSAD2,PTPRS,EPG5,TLR9,RTN4,HMGB1,IRAK4,SLC15A4	c5_GO.Biological.Process
GOBP_SMALL_GTPASE_MEDIATED_SIGNAL_TRANSDUCTION	0.00411772	0.0992593	0.407018	0.23774	1.4144	379	CDC42EP3,MAPKAP1,RIN2,GABARAP,PLEKHG6,EPS8L2,RHOQ,ARHGEF12,FGD3,FGD2,RAC3,SH2B2,BCL6,MET,ARHGAP29,EPS8,RALB,GDI2,RRAD,PLEKHG3,ARHGAP32,STMN3,RTN4R,F11R,SOS2,RND2,DAB2IP,PSD2,G3BP1,MYO9A,RHOH,TIAM2,SIPA1L1,ABL1,PLEKHG5,NRAS,NCKAP1,KRAS,FLCN,RHOT2,SPRY4,RGS19,KITLG,RHOV,NGFR,NKIRAS1,RHOF,RHOG,RANGRF,NUP62,GNB1,CSF1,PLEKHG4,MAP4K4,RACGAP1,TP53,RAPGEF3,CCDC88C,GPR35,SH3BP1,ECT2,RAP2C,ARHGAP26,DAB1,AR…	c5_GO.Biological.Process	0.00058121	0.0385671	0.477271	0.22302	1.55418	383	GABARAP,SIPA1,NKIRAS2,MAPKAPK5,FGD1,SPRY1,LAT,KPNB1,NRAS,RHOV,OBSCN,WASF1,CDC42EP3,PLEKHG1,ABCA1,ARHGAP30,F11R,DOK4,NOTCH1,RHOF,CDC42EP1,FARP2,RABGEF1,RANGRF,PLEKHG5,RASGRP2,RGL3,RAB9B,CDK2,MADD,RASAL3,ABL1,RRAD,ARHGEF2,RAB30,ARHGAP8,SWAP70,VAV1,AKAP13,RALGAPA1,TP53,SPRY3,ARHGAP5,ARHGAP45,ARHGAP40,RALGAPB,MFN2,TAX1BP3,HEG1,RASGRP4,GMIP,LPAR2,RASGRP1,PLEKHG6,RAB33B,WAS,RAPGEF3,RAPGEF6,IQSEC1,CELSR…	c5_GO.Biological.Process
GOBP_NEGATIVE_REGULATION_OF_WNT_SIGNALING_PATHWAY	0.00412464	0.0992593	0.407018	0.305272	1.5722	131	TLE6,TSKU,AMER1,GLI1,TRABD2B,DKK1,EGR1,TRABD2A,CHD8,STK4,RNF213,DAB2IP,STK11,PRICKLE1,G3BP1,MIR29B1,SOX9,HIC1,IGFBP4,RACK1,MCC,SOX13,TLE1,TLE3,LZTS2,SOSTDC1,DACT1,DKK3,CCDC88C,EMD,MDK,LIMD1,TMEM88,NOG,KREMEN1,WNT11,APOE,SOX2,IFT80,STK3,NOTCH1,CSNK1E,WWTR1,TCF7L2	c5_GO.Biological.Process	0.180451	0.61084	0.140406	0.1973	1.17192	132	RBX1,TMEM88,RUVBL2,GSK3A,CBY1,TLE5,LRP1,CAV1,CSNK1A1,NOTCH1,SDHAF2,FZD1,CSNK1E,LZTS2,CITED1,MDK,SOX2,LMBR1L,TAX1BP3,DAB2IP,CHD8,STK11,WNT11,MIR29B1,MAPK14,FUZ,C12orf43,HMGXB4,APC2,RNF213,DACT3,G3BP1,WWTR1,NKX2-5,LRP4,NOTUM,CCDC88C,PFDN5,TSKU,NOG,LIMD1,ANKRD6,HIC1,ISL1,RACK1,STK3,IGFBP6,LATS2,TSC2,AMFR,TLE6	c5_GO.Biological.Process
GOBP_NEGATIVE_REGULATION_OF_T_CELL_MEDIATED_IMMUNITY	0.00412604	0.0992593	0.407018	0.662246	1.86237	11	SMAD7,KLRD1,NCKAP1L,FOXP3,IL4I1,IL20RB	c5_GO.Biological.Process	0.825203	0.942825	0.0552496	0.247451	0.727686	10	SMAD7,NCKAP1L,IL20RB,PPP3CB	c5_GO.Biological.Process
GOBP_WOUND_HEALING	0.0041469	0.0994473	0.407018	0.246079	1.41568	285	AXL,SYT7,AHNAK,TSKU,THBD,LYN,PLEC,NFE2L2,PTK7,PTPN6,ANXA2,ACTB,MYLK,NPR2,DGKE,SCARB1,PDGFA,SMAD3,ERBB3,ITGB6,TGFB1,F11R,USF1,PTK2,MCAM,CHMP7,DGKG,SH2B3,CLASP1,PRKCD,GNAS,MIR29A,MRTFA,CFLAR,CHMP1B,GRHL3,EMILIN1,METAP1,CSRP1,B4GALT1,DGKH,SFTA3,CD151,PPP3CA,STXBP1,FKBP10,AJUBA,EVPL,EPB41L4B,CNN2,DMTN,AK3,DGKQ,ARHGAP35,RHOC,DGKZ,PDGFRA,P2RX1,EXT1,GNA13,SRF,ANO6,NOG,THBS1,MIR200B,MYH9,PROCR,TPM1,NFATC…	c5_GO.Biological.Process	0.0707965	0.433974	0.224966	0.182672	1.24104	296	AXL,BLOC1S3,PTK7,PTPN6,FKBP10,ALOX12,PPARA,GAS6,NPR2,MERTK,ENTPD2,CHMP6,FOXC2,TGFB1,F11R,USF1,DGKE,GP1BB,CAV1,MCAM,SRSF6,ACTB,PRKCE,CHMP5,FERMT3,PRCP,CNN2,DST,XBP1,VAV1,DGKZ,WFDC1,MIR34A,GNAS,LMAN1,CHMP1B,FCER1G,CORO1B,SLC11A1,TYRO3,HGFAC,WAS,NF1,PRKCD,CD109,CX3CL1,TNFRSF12A,MIR29A,WNT4,CD151,F8,FUNDC2,MAPK14,METAP1,ADORA2A,JMJD1C,RAF1,NDNF,FIBP,SCRIB,F12,GATA2,RHOC,HPS6,FGF2,ADAM17,NFE2L2,HIF1A,…	c5_GO.Biological.Process
Keratinization; datasource: reactome;	0.00418573	0.193445	0.407018	0.532171	1.83221	21	KRT18,KRT8,PKP1,KRT7,KRT86,DSC2,PKP2,KRT17,PKP3,KRT15,KRT19	PathwayCommons11	0.316699	0.811161	0.102822	0.256363	1.09095	31	KRT15,KRT19,KRT18,KRT8,DSG2,PKP4,DSC3,PKP3,DSC2	PathwayCommons11
KEGG_MEDICUS_REFERENCE_EGF_EGFR_RAS_PI3K_SIGNALING_PATHWAY	0.00419595	0.13931	0.407018	0.651941	1.86278	12	BAD,EGFR,PIK3CD,SOS2,NRAS,KRAS,AKT2	c2_curated.Canonical.Pathways	0.423077	0.786243	0.0888945	-0.338683	-1.03904	12	EGFR,SOS1,PIK3CA,PIK3CB,GRB2	c2_curated.Canonical.Pathways
WP_VEGFA_VEGFR2_SIGNALING	0.00419698	0.13931	0.407018	0.236253	1.39916	358	PLCB3,MMRN2,CAPN2,MAPKAP1,ACP1,PTPN6,VPS39,TFCP2,DKK1,NR4A2,RCN1,EGR1,TMSB10,AKT1S1,CCDC124,JAG1,SET,TAOK2,TMEM170A,MOV10,PTK2,RPL26,NRARP,FAF1,SHB,PRKCD,ABL1,TNFRSF25,MAPK8,QKI,PBXIP1,STAT6,RELA,NFATC2,NFKBIA,CSRP1,GAPDH,RACK1,CRIP2,PTPN1,MDM2,MAPK9,RICTOR,SOD2,PPP3CA,CTNNA1,RBM39,SHC1,PTMA,MAPK12,PRKCZ,RAB5A,JUN,EPS15,NDRG1,PXN,DNAJB9,PLOD3,PRKD2,EWSR1,CCND1,ITGB5,PRDX6,CDC42BPB,ZNF555,PSMD4,BC…	c2_curated.Canonical.Pathways	0.0115687	0.192202	0.38073	0.198428	1.36115	375	MAP2K7,CCND1,FMNL3,MAPKAPK5,PTPN9,NAPA,PTPN6,TMEM170A,MOV10,PLCB3,GPC1,SHC1,FHOD1,EIF2A,RPS6KB1,ARNT,SLC25A25,ZNF555,CTNNA1,UBAP2L,WASF1,SOD2,MMP2,STAT6,CAV1,HDAC7,CNP,PRKD2,SLC25A11,PRKCE,TNFRSF25,TRPC3,BSG,EIF4G2,PFN1,ABL1,PIK3R2,TPCN2,ATP6V0D1,RBM39,MAPK12,HSP90AA1,PBXIP1,PTMA,LMAN1,RPL7,ZC3H15,SET,FUT1,FAM120A,CCT7,RAB5A,USP10,CREBBP,TUBA1C,PGF,RELA,FJX1,CCDC124,PRKCD,CDC42,GAPDH,TRPC1,EPN1,P…	c2_curated.Canonical.Pathways
GOBP_REGULATION_OF_TRANSMEMBRANE_RECEPTOR_PROTEIN_SERINE_THREONINE_KINASE_SIGNALING_PATHWAY	0.00421216	0.100411	0.407018	0.272785	1.51906	214	MEN1,HTRA4,FSTL3,SMAD7,WFIKKN1,BMP4,DKK1,BCL9L,SKOR1,SKIL,MIRLET7F1,SMAD3,FKBP8,TGFB1I1,TGFB1,CITED2,PMEPA1,BMP6,ACVR2B,STK11,ABL1,MIR29B1,CAV2,ZBTB7A,PCSK6,EMILIN1,BRMS1,MIR26A1,FLCN,NKX2-1,MSX1,ZEB1,SOSTDC1,DACT1,DKK3,TP53,STUB1,BMPR2,MIR26B,ARID4B,UBE2D1,PELO,MIR27B,NOG,SH2B1,THBS1,LEMD3,HIPK2,KCNQ1OT1,ACVR1B,HDAC2,ENG,PDPK1,MIR98,SAP30L,FAM89B,ACVR2A,MIR15B,TGFBR1,SMAD2,NOTCH1,FKBP1A,RASL11B,…	c5_GO.Biological.Process	0.0727273	0.434388	0.224966	0.193954	1.26048	224	TGFBR3L,ZBTB7A,PRMT1,WFIKKN1,INHBA,FAM89B,SPRY1,SMAD7,MIR195,MIR497,FKBP8,PPARA,SNX25,PCSK6,LRP1,TGFB1,ACVR2B,NOTCH1,FZD1,IL17RD,MEN1,ABL1,FKBP1A,LTBP4,CITED1,FOXD1,UBE2D3,HSP90AB1,AMH,TP53,CREBBP,MIR26B,BMP4,LEMD3,FSTL3,ZNF703,ZEB1,CD109,GLG1,STK11,MIR9-1,FLCN,MIR29B1,CIDEA,MICOS10-NBL1,TGFBR2,OGT,DAND5,EP300,HDAC2,CAV2,MIR140,ITGA3,BRMS1,ADAM17,MAGI2,BMP7,LOX,SMAD6,TET1	c5_GO.Biological.Process
GOBP_LENS_FIBER_CELL_DIFFERENTIATION	0.0042188	0.100411	0.407018	0.505832	1.87695	28	HSF4,WNT5B,CDKN1B,SKIL,NF2,SMAD3,BFSP1,WNT7B,KDM5B,PLAAT3,ATF4,FGF2	c5_GO.Biological.Process	0.0513347	0.395641	0.287857	0.354782	1.45771	29	SPRY1,FZR1,WNT7B,WNT5B,PLAAT3,PITX3,HSF4,EPHA2,KDM5B,FGF2,FRS2,SPRED2,SKIL,ATF4,WNT7A,TBC1D20	c5_GO.Biological.Process
GOBP_INFLAMMATORY_RESPONSE	0.00422658	0.100411	0.407018	0.224919	1.37807	515	AXL,DPEP1,SNAP23,ADM,FOSL2,PIK3CD,TNFRSF1A,HAMP,LYN,NFE2L2,MIR141,PTPN6,TRIM65,NR1D1,CARD9,BCL6,NT5E,FUT4,MIR125A,SMAD3,FUT7,HSPG2,BMPR1B,ITGB6,NLRP1,MGLL,TGFB1,F11R,LACC1,WDR83,TSPAN18,MIR15A,MIR16-1,DAB2IP,CYP26B1,BMP6,HNRNPA0,CEBPB,C5AR1,PRKCD,NR3C1,POMT2,MAPK8,PBXIP1,MIR26A1,RELA,IKBKB,MIR324,NFKBIA,B4GALT1,SHARPIN,VPS54,NLRX1,MAPK9,TNFAIP8L2,IL1R1,RICTOR,NFKBIZ,NOD1,NDST1,CD68,RHBDF2,C2CD4A,…	c5_GO.Biological.Process	0.00802498	0.181717	0.38073	0.189728	1.3594	500	PLA2G4C,AXL,KDM6B,NR3C1,RELB,IRF3,MARK4,NKIRAS2,CD68,MIR141,PTPN6,KARS1,MKRN2,TBK1,MIR149,LACC1,ZFP36,DDX3X,SPATA2,LAT,CARD9,FASN,CEBPB,BMPR1B,TCIRG1,MGLL,MIR195,ARNT,PPARA,ZNF580,NFATC3,SIGIRR,FUT7,MIR203A,NAGLU,LOXL3,LRP1,TGFB1,F11R,CSNK1A1,NOTCH1,ITGB2,PDE2A,RABGEF1,WDR83,MIR15A,MIR16-1,A2M,NOS2,MIR338,MIR657,NR1H3,MIR6869,RPS6KA4,ASH1L,PRCP,PBXIP1,NFKB2,MDK,WFDC1,EXTL3,HAMP,GGT1,IL17RC,PSMA1,…	c5_GO.Biological.Process
WP_FACTORS_AND_PATHWAYS_AFFECTING_INSULIN_LIKE_GROWTH_FACTOR_IGF1_AKT_SIGNALING	0.0042527	0.139932	0.407018	0.496643	1.82996	26	MAPKAP1,TNFRSF1A,IGF1R,AKT1S1,SMAD3,ACVR2B,FBXO32,RICTOR,IRS1,RPTOR,WASL,SMAD2,MLST8	c2_curated.Canonical.Pathways	0.58871	0.851985	0.0711327	-0.228113	-0.922369	28	PLD1,IGF1R,IGFBP5,ITGB1,EIF4E,PRKAB1,SMAD2	c2_curated.Canonical.Pathways
GOBP_REGULATION_OF_HEMATOPOIETIC_PROGENITOR_CELL_DIFFERENTIATION	0.00426329	0.100459	0.407018	0.462675	1.78944	35	NFE2L2,RARA,SOS2,YTHDF2,ABL1,FLCN,KITLG,SPI1,ZNHIT1,DPF2,KAT5,ZFP36,PCID2,NOTCH1,HSPA9,SETD1A,FOXC1,PDCD2,EIF2AK2	c5_GO.Biological.Process	0.300589	0.709715	0.107554	0.247383	1.10166	36	ZFP36,NOTCH1,ABL1,DPF2,N4BP2L2,NUDT21,FNIP1,FOXC1,FLCN,SETD1A,GATA2,NFE2L2,KAT5,PCID2	c5_GO.Biological.Process
GOBP_SENSORY_ORGAN_DEVELOPMENT	0.00427329	0.100459	0.407018	0.237421	1.4156	386	TMEM231,IFT122,GNG8,TSKU,EGFR,HOXA1,HSF4,PTK7,PPP1R13L,FSCN2,BMP4,WNT5B,CDKN1B,SMCHD1,RCN1,TULP1,TFAP2A,CYP1B1,ECE1,JAG1,SKIL,NF2,SMAD3,HOXC13,BMPR1B,FKBP8,HOXA2,WNT10A,RARA,CITED2,FAT3,CYP26B1,BMP6,TCAP,ACVR2B,MEIS3,IFT140,FZD2,PRICKLE1,ALDH1A3,BFSP1,ATP2B4,SOX9,THRB,GRHL3,DVL1,TBX2,PYGO2,GRHL2,WNT7B,JAG2,WNT9A,OSR2,KDM5B,C12orf57,TPRN,MSX1,BAX,BAK1,ZEB1,PLAAT3,GNB1,PI4KB,ESRP1,SEC24B,EPHA4,MEIS…	c5_GO.Biological.Process	3.4095e-05	0.00704316	0.557332	0.237148	1.66537	413	DVL2,SIX5,BLOC1S3,PTK7,PAFAH1B1,INHBA,SPRY1,FZR1,PYGO2,JAG2,FSCN2,CECR2,ACHE,ECE1,TPRN,BMPR1B,TCIRG1,FKBP8,TFAP2A,SLC25A25,PAX2,ESRP1,CLCN2,LAMB2,PDE6B,MERTK,BAX,C12orf57,FOXC2,NAGLU,ACVR2B,HOXC13,NOTCH1,ZHX2,LHX3,B9D1,CRYGS,WNT7B,MFAP2,EPHA4,RARB,MKS1,WNT5B,CABP4,STAU2,POU4F3,HOXA1,ALDH1A3,RARG,WNT10A,BCL2L11,SIX4,WNT2B,SOX2,SCO2,GRHL2,TBX2,RDH10,SH3PXD2B,FZD2,PLAAT3,MFN2,PBX3,PPP1R13L,JMJD6,MEI…	c5_GO.Biological.Process
GOBP_CALCITONIN_FAMILY_RECEPTOR_SIGNALING_PATHWAY	0.00427884	0.100459	0.407018	0.977575	1.51408	2	ADM,SCN11A	c5_GO.Biological.Process	0.925101	0.97412	0.0497903	0.267521	0.610802	5	RAMP1,SCN11A,RAMP2	c5_GO.Biological.Process
GOBP_POSITIVE_REGULATION_OF_CATABOLIC_PROCESS	0.00428249	0.100459	0.407018	0.225324	1.36665	473	BAD,CHFR,GABARAP,MIR192,FBXL5,HAMP,AMER1,KEAP1,NFE2L2,SMAD7,ZFP36L2,CDKN1B,SESN1,TRIM65,CPT1A,NOP53,TMEM259,MIRLET7A1,MIRLET7E,MIR125A,RALB,ABCA2,TGFB1I1,MOV10,MIR151A,PTK2,STX5,DAB2IP,DCP1A,PACSIN3,STK11,PRICKLE1,FAF1,EXOSC3,DDA1,PRKCD,YTHDF2,ULK1,SUMO2,SOX9,WDR24,TRIM8,TRIB3,DVL1,CSDE1,NEDD4,TNRC6A,CDK16,TP53INP1,RACK1,LSM1,GGA3,FLCN,PTPN1,BAG3,MDM2,MAPK9,NOD1,TNFSF12,PLEKHF1,APOA2,PLK3,PAN2,GA…	c5_GO.Biological.Process	0.00694658	0.167386	0.407018	0.191631	1.36437	472	RBX1,GABARAP,PSMC3,MIR192,CAPRIN1,TNRC6B,GSK3A,OAZ1,MOV10,TBK1,TRIM8,BAD,USP5,MIR149,FZR1,SMAD7,ZFP36,SAMD4A,TMEM259,RNFT1,MIR195,MIR497,ZFAND2A,ARNT,CHFR,DDA1,CSDE1,SUMO2,PPARA,TRIB3,BAX,GGA3,LRP1,CAV1,CSNK1A1,DCP1A,PAN2,GCLC,RPTOR,PRKCE,LARP1,ADCY10,CSNK1E,ATG101,BECN1,CNOT11,SNX9,HSP90AA1,OAZ3,TNFSF12,MIR191,HAMP,ARIH1,FGF21,NPRL3,MIR26B,AKT2,PACSIN3,CERS1,RNF41,CNOT2,MIRLET7E,MIR125A,SH3RF3,S…	c5_GO.Biological.Process
GOBP_NEUTRAL_AMINO_ACID_TRANSPORT	0.00430873	0.100459	0.407018	0.452313	1.72408	33	SLC38A2,SLC1A5,SLC3A2,RGS2,SLC25A13,SERINC3,SFXN2,SLC6A19,SLC6A18,CLTRN,ACE2,LLGL2,SLC38A5,CTNS,MFSD12	c5_GO.Biological.Process	0.379032	0.756379	0.0949752	-0.241636	-1.05605	35	SLC6A6,SLC1A2,SLC3A2,SLC38A9,SLC1A1,MFSD12,SLC36A4,SLC1A3,SFXN1,SLC3A1,SFXN2,SLC7A5,SLC43A1,LLGL2,SLC25A38	c5_GO.Biological.Process
Activation of the AP-1 family of transcription factors; datasource: reactome;	0.00430892	0.193445	0.407018	0.671222	1.84061	10	MAPK10,MAPK8,MAPK9,MAPK11,JUN,FOS,MAPK3	PathwayCommons11	0.228516	0.721304	0.12564	0.405771	1.19081	10	MAPK11,FOS,MAPK9,MAPK14,MAPK3	PathwayCommons11
GOBP_REGULATION_OF_NITRIC_OXIDE_SYNTHASE_ACTIVITY	0.00431967	0.100459	0.407018	0.535138	1.79575	20	EGFR,NOSIP,SCARB1,NOS1AP,ATP2B4,MIR26A1,IL1B,MIR27B,APOE,IL1A,TERF2,DHFR	c5_GO.Biological.Process	0.297619	0.707517	0.10882	-0.297165	-1.1231	21	EGFR,MIR27B,NOS1AP,DHFR	c5_GO.Biological.Process
GOBP_MAINTENANCE_OF_PRESYNAPTIC_ACTIVE_ZONE_STRUCTURE	0.00432081	0.100459	0.407018	-0.852755	-1.85771	5	ERC1,CTBP2	c5_GO.Biological.Process	0.310204	0.719941	0.107972	0.463656	1.13376	6	CTBP2,ERC1,BSN	c5_GO.Biological.Process
Validated transcriptional targets of AP1 family members Fra1 and Fra2; datasource: pid;	0.00433181	0.193445	0.407018	0.48139	1.81356	28	FOSL2,THBD,USF2,SP1,NFATC2,JUNB,BGLAP,JUN,CCND1,ATF4,NFATC1,MMP2,JUND,EP300	PathwayCommons11	0.132296	0.650561	0.169571	0.327588	1.31245	26	CCND1,NFATC3,MMP2,JUND,ITGB4,LIF,USF2,EP300,HMOX1,ATF4,PLAUR	PathwayCommons11
GOBP_REGULATION_OF_ISOTYPE_SWITCHING_TO_IGE_ISOTYPES	0.00435114	0.100857	0.407018	0.744842	1.78196	7	BCL6,CLCF1,STAT6,FOXP3,TNFSF4	c5_GO.Biological.Process	0.177734	0.607657	0.144631	-0.539694	-1.3036	6	BCL6,FOXP3	c5_GO.Biological.Process
GOBP_REGULATION_OF_CD4_POSITIVE_ALPHA_BETA_T_CELL_ACTIVATION	0.00440301	0.101481	0.407018	0.402492	1.71885	48	SMAD7,ARG2,BCL6,RARA,SHB,RUNX1,JUNB,NFKBIZ,NCKAP1L,FOXP3,PRKCZ,ZBTB7B,TNFSF4	c5_GO.Biological.Process	0.901408	0.967651	0.0507028	0.148882	0.713343	50	SMAD7,ZBTB7B,LOXL3,CARD11,JAK3,NCKAP1L,NFKBID,SOCS1,TGFBR2,MALT1,SHB,PRKCZ,LGALS9,CBFB,NLRP3,NFKBIZ	c5_GO.Biological.Process
GOBP_CARDIAC_CHAMBER_MORPHOGENESIS	0.00440468	0.101481	0.407018	0.341871	1.65677	91	SMAD7,PPP1R13L,TNNT2,BMP4,JAG1,TGFB1,CITED2,FZD2,TBX2,GRHL2,DHRS3,MDM2,TNNI3,MYBPC3,PKP2,TP53,BMPR2,SRF,NOG,FGFR2,TPM1,NRP1,WNT11,ENG,TGFBR1,NOTCH1,FKBP1A,TGFBR3,MED1,TBX1,FOXC1,ADGRG6,ZFPM2,MKS1,HEY1,DLL4,SLIT2,NSD2,OVOL2,NAGLU,TGFB2,GSK3A,MYL3	c5_GO.Biological.Process	0.0281397	0.298657	0.352488	0.268814	1.51882	100	GSK3A,SMAD7,FOXC2,NAGLU,TGFB1,NOTCH1,FZD1,FKBP1A,MKS1,TP53,ZFPM1,GRHL2,TBX2,FZD2,HEG1,PPP1R13L,OVOL2,BMP4,MED1,TBX1,FGFRL1,WNT11,SMO,FOXC1,TGFBR2,DLL4,ADPRHL1,TNNT2,CPE,MYL3,BMP7,NKX2-5,SMAD6,HIF1A,FGFR2	c5_GO.Biological.Process
Validated targets of C-MYC transcriptional repression; datasource: pid;	0.00440745	0.193445	0.407018	0.388427	1.65782	51	PTPA,FTH1,ID2,SP1,CDKN1B,DKK1,SMAD3,BRCA1,CFLAR,CSDE1,MYC,SPI1,TMEM126A,NDRG1,CCND1,ZFP36L1,SMAD2,NFYA,EP300,SLC11A1,GFI1,CREB1,NFYC,TSC2,ITGB4	PathwayCommons11	0.684502	0.940467	0.059476	0.179662	0.866786	53	CCND1,BRCA1,CSDE1,MXD4,ITGB4,MYC,PTPA,ZBTB17,SLC11A1	PathwayCommons11
WP_HEAD_AND_NECK_SQUAMOUS_CELL_CARCINOMA	0.00441337	0.141588	0.407018	0.376767	1.68917	61	MAPKAP1,EGFR,KEAP1,NFE2L2,SESN1,IGF1R,STK11,TP63,NRAS,RELA,KRAS,RICTOR,AJUBA,TP53,CCND1,RPTOR,CASP8,AKT2,FGFR2,PDPK1,IRF6,RHEB,NOTCH1,FKBP1A,MLST8,RPS6KB2,PIK3R2	c2_curated.Canonical.Pathways	0.250497	0.663628	0.120433	0.22222	1.14762	64	CCND1,RPS6KB2,NRAS,NOTCH1,RPTOR,FKBP1A,PIK3R2,NFKB2,IRF6,TP53,EIF4EBP1,AKT2,RELA,CUL3,E2F1,STK11,TGFBR2,MLST8,MIRLET7C,TSC1,NFE2L2,FGFR2,FGFR3,AJUBA,MTOR,RB1,KEAP1,PDPK1,FAT1,TSC2	c2_curated.Canonical.Pathways
KEGG_ERBB_SIGNALING_PATHWAY	0.0044146	0.141588	0.407018	0.36252	1.71127	75	BAD,PAK6,EGFR,PIK3CD,CDKN1B,MAPK10,CBLC,BTC,ERBB3,PTK2,SOS2,ABL1,MAPK8,NRAS,MYC,KRAS,MAPK9,SHC1,JUN,AKT2,PRKCG,MAPK3,PRKCA,PIK3R3,NCK1,PAK5,CBLB,RAF1,RPS6KB2,PIK3R2,MAP2K7	c2_curated.Canonical.Pathways	0.572614	0.846328	0.0739901	0.176213	0.935057	75	MAP2K7,RPS6KB2,BAD,SHC1,RPS6KB1,NRAS,MYC,ABL1,PIK3R2,EIF4EBP1,CAMK2G,PAK6,AKT2,MAPK9,STAT5A,STAT5B,RAF1	c2_curated.Canonical.Pathways
WP_NCRNAS_INVOLVED_IN_STAT3_SIGNALING_IN_HEPATOCELLULAR_CARCINOMA	0.00442163	0.141588	0.407018	0.587883	1.86014	16	MIR200C,IL11,JAK1,RELA,IL11RA,ZEB1,IL6R,MIR200A,MIR200B,IL6ST	c2_curated.Canonical.Pathways	0.11546	0.519343	0.183024	0.395338	1.35758	16	MIR200C,IL11,JAK3,RELA,ZEB1,MIR200A,MIR200B,IL6ST	c2_curated.Canonical.Pathways
GOBP_POSITIVE_REGULATION_OF_CELL_JUNCTION_ASSEMBLY	0.00443198	0.101731	0.407018	-0.346777	-1.65324	62	VEGFA,SEMA4D,S100A10,EPHB2,EPHA2,FMN1,VSTM5,IRX3,RAC1,EPB41L5,EFNA5,FLRT3,NPHP4,COL16A1,ADGRB1,GPRASP3,ITGB1BP1,LRRN1,SYNDIG1,SDC4,CLDN1,PTPRJ,ROCK1,SFRP1,CAV1	c5_GO.Biological.Process	0.0788955	0.4503	0.224966	0.273478	1.35672	59	ADNP,AGRN,CAV1,ABL1,STAU2,CRB3,PPM1F,EPHB3,ARMCX5-GPRASP2,GPRASP3,NLGN3,WNT4,EPHA2,ADGRB1,TSC1,NTRK1,RAC1,POLDIP2,LRRC24	c5_GO.Biological.Process
GOBP_BODY_MORPHOGENESIS	0.00444294	0.101731	0.407018	0.429385	1.70071	38	PHLDB1,IFT122,SGPL1,DKK1,PAX9,PRICKLE1,CLASP1,MSX1,ARID5B,PDGFRA,NOG,CDON,RRAS,TIPARP,SSBP3,MMP2,NIPBL,EP300,TBX1,FUZ	c5_GO.Biological.Process	0.639113	0.87429	0.0670513	0.195055	0.900925	42	ARID5B,MMP2,ANKRD11,RRAS,TBX1,PHLDB1,PTPN11,FUZ,EP300,BRAF,CLASP2,MSX1,NOG,TGFB3,NIPBL,COL1A1,DAG1	c5_GO.Biological.Process
Angiogenesis; datasource: panther;	0.00444997	0.193445	0.407018	0.311244	1.60201	121	PIK3CD,PRKCH,WNT5B,JAG1,PDGFA,TGFB1I1,FRS3,WNT10A,PTK2,SOS2,JAK1,FZD2,PRKCD,MAPK8,DVL1,NRAS,WNT7B,JAG2,GRB7,SHC1,PRKCZ,SPHK1,JUN,PXN,PRKD2,FOS,RHOC,EPHB3,PDGFRA,AKT2,TCF7,PRKCG,CRYAB,MAPK3,PRKCA,PRKCE,F2R,PIK3R3,PRR5,ARHGAP8,NCK1,NOTCH1,PLA2G4B,PRKD3,TCF7L2,RAF1,PRKCI	PathwayCommons11	0.118492	0.63427	0.172324	0.21179	1.23734	129	PLA2G4C,DVL2,PLA2G4D,SHC1,JAG2,NRAS,SPHK2,NOTCH1,PDGFC,PRKD2,WNT7B,FZD1,PRKCE,PIK3R2,WNT5B,ARHGAP8,PRR5,WNT10A,WNT2B,FZD2,EPHB3,AKT2,GRB7,FOS,PRKCD,MAPK14,DLL4,RAF1,APC2,RHOC,BRAF,PXN,MAPK3,FRS2,CASP9,HIF1A,PRKCZ,PDGFA,MAP2K4,FZD3,F7,NCK1,SHC2,CRK,WNT7A,PIK3CD,ARHGAP1,PLA2G4B,MAP2K2,DVL3	PathwayCommons11
GOBP_POSITIVE_REGULATION_OF_CELL_ADHESION	0.00445555	0.101731	0.407018	0.24724	1.43434	310	BAD,TNFRSF18,SMARCD2,RIN2,PLEKHA2,LYN,FSTL3,SMAD7,PTPN6,FLOT2,AP3D1,RAC3,ACTB,BCL6,FUT4,HAS2,SMAD3,FUT7,SOX12,EFEMP2,F11R,TESK1,LAMC1,DHPS,STK4,RARA,CITED2,PIEZO1,JAK1,SHB,RHOH,ABL1,EMILIN1,RUNX1,RELA,CD27,CORO1A,BAG4,FLCN,ARID1B,NFKBIZ,ARID1A,PPP3CA,KITLG,SOX13,NCKAP1L,FOXP3,IL4I1,PRKCZ,CSF1,PRKD2,MAP4K4,ZBTB7B,EFNB3,EPB41L4B,TNFSF4,KAT5,IL1B,SMARCC1,ARPC2,UNC13D,EPHA4,ARID2,MDK,CCDC88B,MIR27B,N…	c5_GO.Biological.Process	0.15937	0.589485	0.144631	0.166439	1.14122	314	NFAT5,PTPN6,STX3,BAD,SMAD7,ZBTB7B,ARL2,LAMB2,FUT7,LDB1,FOXC2,F11R,TNFSF9,CAV1,TNFRSF13C,ITGB2,PRKD2,CD4,DHPS,ACTB,LIF,PRKCE,HSPD1,AP3D1,EPHA4,RASAL3,ABL1,PIK3R2,CCDC88B,CARD11,XBP1,VAV1,MDK,SOX2,EFNB3,FUT1,NCKAP1L,PPM1F,RASGRP1,FOXA1,SMARCE1,C1QBP,TRIOBP,LAMC1,ZFHX3,NEDD9,PIEZO1,RRAS,RELA,NFKBID,FSTL3,ADGRG1,CDC42,AMBRA1,CX3CL1,FLOT2,PTPN11,FLCN,CD47,WNT4,SOCS1,STAT5B,IRAK1,SMARCD2,TGFBR2,ACTL6B,…	c5_GO.Biological.Process
WP_ANTIVIRAL_AND_ANTI_INFLAMMATORY_EFFECTS_OF_NRF2_ON_SARS_COV_2_PATHWAY	0.00447206	0.141588	0.407018	0.566445	1.85236	18	KEAP1,NFE2L2,RELA,IKBKB,NFKBIA,RXRA,IL1B,GCLC,ACE2,IRF3	c2_curated.Canonical.Pathways	0.545631	0.839383	0.0730744	0.259934	0.928355	18	IRF3,GCLC,RELA,NFE2L2,HMOX1,GUCY1A1,KEAP1	c2_curated.Canonical.Pathways
IL-4 signaling pathway(JAK1 JAK3 STAT6) ( IL-4 signaling(JAK1 JAK3 STAT6) ); datasource: inoh;	0.00447719	0.193445	0.407018	0.822427	1.78508	5	PTPN6,JAK1,STAT6	PathwayCommons11	0.0332441	0.572801	0.321776	0.724583	1.63253	5	PTPN6,STAT6,JAK3	PathwayCommons11
REACTOME_REGULATION_OF_TP53_ACTIVITY_THROUGH_ACETYLATION	0.00449012	0.141588	0.407018	0.513911	1.87279	25	CHD3,CHD4,PML,MTA2,BRPF3,TP53,AKT2,KAT6A,HDAC2,GATAD2A,MEAF6,EP300	c2_curated.Canonical.Pathways	0.0189955	0.244845	0.352488	0.415645	1.65317	26	MTA2,CHD3,CHD4,BRPF1,TP53,ING5,BRD1,AKT2,GATAD2A,EP300,HDAC2,KAT6A,PIP4K2C,BRPF3	c2_curated.Canonical.Pathways
thyroid hormone biosynthesis; datasource: humancyc;	0.00449715	0.193445	0.407018	0.995947	1.32463	1	CTSD	PathwayCommons11	0.756539	0.954091	0.0588438	0.619506	0.819172	1	CTSD	PathwayCommons11
T.cells	0.00449808	0.0208711	0.407018	0.440651	1.7189	37	TNFRSF18,CD247,IL11,EGR1,CXCR5,AIRE,STAT6,CD27,FOXP3,TP53,LAG3,ITGA1,TFEB,BLVRA,IL5,IRF1	NanoString_Genes	0.136821	0.466801	0.169571	-0.292755	-1.27544	36	LAG3,FOXP3,IRF1,IL18R1,IL18,IL12A,CD1D,ITGA1,TFEB,IL4R,CD276	NanoString_Genes
GOBP_ENDOPLASMIC_RETICULUM_LOCALIZATION	0.00454644	0.103283	0.407018	0.674251	1.83149	10	TLE6,ESYT1,ESYT2,GRAMD2A,VAPA	c5_GO.Biological.Process	0.800813	0.934576	0.0566484	0.251889	0.740735	10	VAPB,ESYT1,VAPA,TLE6,GRAMD2A	c5_GO.Biological.Process
GOBP_ENDOTHELIAL_CELL_PROLIFERATION	0.00455861	0.103283	0.407018	0.302211	1.57046	139	MMRN2,PIK3CD,SP1,MIR200C,BMP4,SCARB1,POLD4,HSPG2,NOX5,MIR15A,MIR16-1,BMP6,MIR101-1,NRARP,PDCD6,MIR29A,CAV2,NRAS,MIR26A1,VEGFB,RICTOR,TNFSF12,NGFR,ECM1,AIMP1,PLXNB3,PRKD2,RPTOR,ANG,MIR10A,BMPR2,MDK,MIR24-1,MIR27B,THAP1,THBS1,NRP1,PRKCA,NR2F2,FGF2,APOE,PDPK1,MIR98,MIR15B,TGFBR1,ZNF580,MIR126,EGFL7,MIR152,PDCL3,NR4A1,NF1,MIR135B,DLL4,MIR30E	c5_GO.Biological.Process	0.0172301	0.246707	0.352488	0.238906	1.43433	139	MIR200C,MIR149,MIR497,ARNT,NRAS,ZNF580,CAV1,PRKD2,RPTOR,MIR15A,MIR16-1,MIR10B,ANG,VEGFB,ATP5F1A,MDK,SLC39A9,TNFSF12,MIR34A,MYDGF,FUT1,MIR152,BMP4,PGF,JCAD,NF1,KRIT1,MIR29A,EPHA2,STAT5A,NGFR,MIR193A,DLL4,DLG1,MMRN2,CAV2,GATA2,MIR10A,FGF2,ADAM17,MIR126,EGFL7,POLD4,PDCD6,HIF1A,HMOX1	c5_GO.Biological.Process
GOBP_RESPONSE_TO_METAL_ION	0.00456419	0.103283	0.407018	0.258418	1.46023	244	SYT7,DPEP1,EGFR,HAMP,NFE2L2,FOSB,ERCC1,TNNT2,CARF,CAPN3,CDKN1B,TFAP2A,ANXA11,D2HGDH,CRIP1,BMP6,SLC25A23,LTA4H,PDCD6,P2RX4,KMT2A,MAPK8,KHK,NEDD4,DLG4,NFATC2,VPS54,JUNB,MDM2,SYT5,MAPK9,SOD2,SYT17,PPP3CA,ITPR3,BGLAP,JUN,NDRG1,SLC25A13,GIPR,ADD1,DMTN,MT1E,FOS,ECT2,CALM3,CASP8,CACNA1H,PPP5C,TESMIN,GCLC,THBS1,ATF4,ADCY7,ATG5,MAPK3,TIGAR,ATP7B,PPP1CA,MT2A,ASS1,ITPKA,NEUROD2,HSP90B1,CPNE7,BSG,KCNMB4,CPNE…	c5_GO.Biological.Process	0.711575	0.904402	0.0589694	0.138072	0.90965	248	GSK3A,SLC25A23,SLC30A3,TCIRG1,TFAP2A,CPNE9,OGG1,SOD2,HSD17B1,MCOLN1,CAV1,JUND,NPTX1,GCLC,FOSB,RASGRP2,TRPC3,BACE1,ATP13A2,BSG,BECN1,CASP3,HAMP,ERCC1,SLC11A1,NEUROD2,ADCY7,DLG4,PPP5C,CPNE1,ACER1,ATP7B,FOS,NCSTN,TRPC1,CDH1,CYBRD1,MAPK9,UCP2,MECP2,TFR2,SYT17,VPS54,SLC30A1,STIM1,DDX19A,DLG2,TNNT2,PPP2CA,BRAF,NFE2L2,MAPK3,CASP9,PDCD6,HIF1A,HMOX1,SDC1,ADD1,NEDD4,ATF1,CEBPA,ATP5F1D,ATF4,KCNIP2,ADGRV1,TF…	c5_GO.Biological.Process
PID_AR_TF_PATHWAY	0.00457185	0.142838	0.407018	0.440464	1.7769	38	EGR1,NR3C1,MAPK8,RACK1,MDM2,JUN,RXRA,KAT5,SMARCC1,POU2F1,NCOA2,HDAC7,SENP1,CARM1,ZMIZ2,EP300,HSP90AA1,DNAJA1	c2_curated.Canonical.Pathways	0.0257277	0.284584	0.352488	0.354365	1.61356	42	NR3C1,NR2C2,PKN1,HDAC7,HSP90AA1,CREBBP,SMARCE1,ZMIZ2,APPBP2,MAPK14,SMARCA2,EP300,GATA2,NCOA1,KAT5,MAP2K4,CEBPA	c2_curated.Canonical.Pathways
Butirosin and neomycin biosynthesis; datasource: kegg;	0.00458285	0.194232	0.407018	-0.877756	-1.79382	4	HK2,HKDC1,HK1	PathwayCommons11	0.0707269	0.583294	0.237794	-0.703855	-1.4622	4	HKDC1,HK1,HK2	PathwayCommons11
GOBP_POSITIVE_REGULATION_OF_PROTEOLYSIS	0.00460367	0.10364	0.407018	0.25034	1.44151	277	BAD,CTSD,MBP,CHFR,GABARAP,LYN,KEAP1,NFE2L2,SMAD7,EFNA1,ANXA2,CAPN3,NOP53,CARD9,TMEM259,SMAD3,NLRP1,TGFB1I1,PTK2,MIR15A,DAB2IP,PACSIN3,PRICKLE1,PDCD6,DDA1,SUMO2,MIR29B1,TRIB3,DVL1,MYC,RACK1,MDM2,MAPK9,GRIN1,NOD1,NGFR,PLK3,BAX,MAPK12,RNF144B,BAK1,RNF217,ENO1,APH1B,TRAF7,BCAP31,IL1B,EPHA4,STUB1,CASP8,MTCH1,ATP2A3,IST1,TNIP1,GCLC,MIR27B,MYH9,BCL2L10,CASP10,PSMC2,EGLN3,F2R,CDC20,SENP1,CTSV,HDAC2,APOE,…	c5_GO.Biological.Process	0.015971	0.241057	0.352488	0.20581	1.37287	278	RBX1,GABARAP,PSMC3,GSK3A,BAD,USP5,FZR1,SMAD7,DDX3X,CARD9,GSN,TMEM259,RNFT1,ZFAND2A,CTSK,CHFR,DDA1,SUMO2,TRIB3,BAX,HTRA2,CAV1,CSNK1A1,IST1,MYC,GCLC,MIR15A,HSPE1,HSPD1,CSNK1E,EPHA4,PSME3,MELTF,SNX9,MAPK12,FGFR4,ARIH1,AURKAIP1,EFNA1,PPM1F,PACSIN3,SH3RF3,DAB2IP,TRAF7,NCSTN,RCN3,ATXN3,ST20,NDUFA13,MIR29B1,RNF180,MAPK9,GRAMD4,FBXO22,DDRGK1,NGFR,ZER1,TTBK1,TAF1,OGT,SGTA,HDAC2,F12,MALT1,ADAM8,NFE2L2,KHDC…	c5_GO.Biological.Process
WP_ONCOSTATIN_M_SIGNALING_PATHWAY	0.00460525	0.142838	0.407018	0.410594	1.74875	49	PRKCH,CDKN1B,EGR1,JAK1,CEBPB,PRKCD,MAPK8,RELA,NFKBIA,KRAS,JUNB,MAPK9,RICTOR,SHC1,IRS1,PXN,FOS,MAPK3,PRKCA,PRKCE,IL6ST,RAF1,JUND,OSMR,PIAS3,CREB1	c2_curated.Canonical.Pathways	0.184	0.602803	0.143759	0.249472	1.2116	52	SHC1,CEBPB,JUND,PRKCE,CDK2,JAK3,CASP3,RELA,FOS,PRKCD,PTPN11,MAPK9,MAPK14,STAT5B,RAF1,PXN,MAPK3,HIF1A,IL6ST	c2_curated.Canonical.Pathways
GOBP_CELL_CELL_JUNCTION_ORGANIZATION	0.00460819	0.10364	0.407018	0.298306	1.55291	142	TLN2,CLDN7,ARVCF,LSR,PLEC,SMAD7,PRKCH,ACTB,INAVA,FBF1,NF2,SMAD3,PKP1,TGFB1,F11R,ESAM,KIFC3,BMP6,MICALL2,IKBKB,GRHL2,FLCN,PKN2,CTNNA1,PKP2,ADD1,IL1B,EPHA4,CNTNAP1,ECT2,CDH15,PKP3,RHOC,EXT1,SRF,CLDN9,HDAC7,MYADM,PRKCA,WHRN,F2R,WNT11,HOPX,LIMS1,ACE2,TGFBR1,CDC42,PARD6B,PRKCI,CD9,AJM1,HIPK1,CDH24,CAMSAP3,NUMBL,JUP,TGFB2,DLG1,NPHP1,RHOA,PKP4	c5_GO.Biological.Process	0.097561	0.492386	0.195789	0.207267	1.25938	145	AJM1,CDH24,FBF1,SMAD7,CLDN7,ARL2,CTNNA1,TGFB1,F11R,CAV1,HDAC7,ACTB,PIP5K1C,ARVCF,EPHA4,INAVA,CDH3,SLC39A9,LSR,GRHL2,HEG1,DSG2,ZNF703,CDC42,UGT8,WNT11,CDH1,GJB2,FLCN,PKP4,EPHA2,FSCN1,ADAM10,PKP3	c5_GO.Biological.Process
GOBP_TRACHEA_DEVELOPMENT	0.00462073	0.10364	0.407018	0.615047	1.84767	14	BMP4,HOXA5,RARA,SOX9,WNT7B,RARG,SRF,MAPK3	c5_GO.Biological.Process	0.277433	0.693829	0.116234	0.334097	1.14908	17	HOXA5,WNT7B,RARG,BMP4,TGFBR2,MAPK3	c5_GO.Biological.Process
REACTOME_CD22_MEDIATED_BCR_REGULATION	0.00468388	0.143562	0.407018	0.901294	1.80429	4	LYN,PTPN6,CD22	c2_curated.Canonical.Pathways	0.11245	0.516259	0.188204	0.666723	1.40043	4	PTPN6,CD79A,CD22,LYN	c2_curated.Canonical.Pathways
WP_TROP2_REGULATORY_SIGNALING	0.00470448	0.143562	0.407018	0.45385	1.78412	35	CLDN7,EGFR,CDKN1B,IGF1R,PTK2,PRKCD,RACK1,BAX,JUN,CCND1,MDK,PRKCA,TACSTD2	c2_curated.Canonical.Pathways	0.256048	0.672194	0.119888	-0.256923	-1.13129	36	EGFR,BCL2,IGF2R,STAT1,IGF1R,ITGB1,CCNE1,PRKCA,CDKN1B,PTK2,JUN,VIM	c2_curated.Canonical.Pathways
Heterotrimeric GPCR signaling pathway (through G alpha s ACs Epac BRaf and ERKcascade) ( GPCR signaling (G alpha s, Epac and ERK) ); datasource: inoh; ""	0.00471193	0.196809	0.407018	0.310712	1.5554	106	INHBC,INHBE,BMP4,WNT5B,BMP8B,OXT,IL11,JAG1,PDGFA,CSF2,BTC,WNT10A,TGFB1,BMP6,FGF5,FZD2,GNAS,WNT7B,JAG2,ADCY9,VEGFB,WNT9A,KITLG,FGF17,IL1B,LHB,ADCY10,NTF4,ADCY7,GNB5	PathwayCommons11	0.00927021	0.545976	0.38073	0.285938	1.61602	108	INHBA,JAG2,ADCY3,IL11,TGFB1,WNT7B,FZD1,LIF,ADCY10,VEGFB,WNT5B,WNT10A,NTF3,WNT2B,ADCY5,GNAS,DHH,FZD2,FGF21,BMP4,ADCY7,NTF4,TXLNA,ADORA1,FZD4,ADCY6,WNT11,SMO,WNT4,ADORA2A,PYY,DLL4,FZD9,FGF2,FGF19,BMP7,GNB5,FGF22,PDGFA,FZD3,GNB3	PathwayCommons11
GOBP_GLUCAN_METABOLIC_PROCESS	0.00477976	0.106867	0.407018	0.379028	1.67261	59	NR1D1,PPP1R3D,GABARAPL1,PTGES3,KHK,PER2,PHKA2,PPP1R3E,UGP2,PPP1R3F,IRS1,RB1CC1,PHKG2,PYGL,ADCY10,AKT2,GYG1,DYRK2,INPP5K,PPP1CA,PFKM,IL6ST,MIR15B,PHKA1,LEPR	c5_GO.Biological.Process	0.13215	0.557734	0.170932	0.25604	1.27021	59	GYS1,PYGB,GSK3A,GYS2,MIR195,NHLRC1,STK40,PYGM,ADCY10,PPP1R2,GYG1,PPP1R3E,AKT2	c5_GO.Biological.Process
GOBP_DEFENSE_RESPONSE	0.00479262	0.106867	0.407018	0.202136	1.3063	1035	CYP27B1,AXL,MMRN2,DPEP1,NT5C2,MAP4K2,HEXIM1,SNAP23,ADM,FOSL2,TRAFD1,PIK3CD,TNFRSF1A,CACTIN,HAMP,LYN,SPON2,NFE2L2,MIR141,PTPN6,FLOT2,ZDHHC5,LCN2,INAVA,ARG2,TRIM65,FAU,NR1D1,NOP53,RAB2B,CARD9,BCL6,NT5E,SH2D1A,RAB1A,FUT4,MIR125A,PML,SMAD3,FUT7,HSPG2,BMPR1B,ITGB6,NLRP1,MGLL,MOV10,NOX5,TGFB1,F11R,LACC1,ISG15,WDR83,TSPAN18,MIR15A,MIR16-1,RNF213,DAB2IP,CYP26B1,BMP6,RPS6KA3,JAK1,HNRNPA0,KLRD1,G3BP1,GBP6,…	c5_GO.Biological.Process	0.000363914	0.0286291	0.498493	0.184716	1.41261	1021	PLA2G4C,AXL,KDM6B,NR3C1,RELB,IRF3,SERPINB9,MARK4,NKIRAS2,RNF26,CD68,CXCL16,PPP1R14B,MIR141,PTPN6,ISG15,KARS1,INHBA,GNG7,MKRN2,NT5C2,MOV10,TBK1,TRIM8,MIR149,LACC1,SHC1,TRIM41,ZFP36,DDX3X,SPATA2,LAT,CARD9,FASN,CEBPB,GSN,BMPR1B,TCIRG1,RPS6KB1,MGLL,TMEM106A,MIR195,CIITA,ARNT,PPARA,ZNF580,RBM14,LGR4,NFATC3,DUS2,SIGIRR,FUT7,MIR203A,NECTIN2,HEXIM1,RNF166,SPON2,NAGLU,LOXL3,CEBPG,LRP1,STAT6,TGFB1,F11R,CAV…	c5_GO.Biological.Process
Transport of glycerol from adipocytes to the liver by Aquaporins; datasource: reactome;	0.00479948	0.197601	0.407018	0.995492	1.32402	1	AQP7	PathwayCommons11
SDK interactions; datasource: reactome;	0.00488258	0.198192	0.407018	-0.995355	-1.3398	1	SDK1	PathwayCommons11	0.00119704	0.42944	0.45506	-0.984183	-1.57168	2	SDK1,SDK2	PathwayCommons11
GOBP_POSITIVE_REGULATION_OF_ENDOTHELIAL_CELL_DIFFERENTIATION	0.00489866	0.108913	0.407018	0.612004	1.83853	14	MIR200C,BMP4,BTG1,MIR99B,BMP6,VEZF1,ETV2,NOTCH1,MIR181A2	c5_GO.Biological.Process	0.0674603	0.430426	0.245042	0.465295	1.50574	13	MIR200C,NOTCH1,MIR34A,ETV2,BMP4,MIR99B	c5_GO.Biological.Process
PID_AP1_PATHWAY	0.00491021	0.147199	0.407018	0.398037	1.71891	52	FOSL2,TRIP6,SP1,FOSB,CDKN1B,EGR1,CSF2,TGFB1,NR3C1,MYC,NFATC2,JUNB,JUN,TP53,CCND1,FOS,NFATC1,MT2A,ATF3,TCF7L2,JUND,EP300,COPS5,IL5,CREB1	c2_curated.Canonical.Pathways	0.0511117	0.410148	0.321776	0.328184	1.54294	46	CCND1,NR3C1,MAFG,NFATC3,TGFB1,JUND,ELF1,MYC,FOSB,BAG1,DUSP1,BCL2L11,TP53,TRIP6,FOS	c2_curated.Canonical.Pathways
HALLMARK_ADIPOGENESIS	0.00491741	0.0819569	0.407018	0.28154	1.50265	169	PHLDB1,CRAT,BAZ2A,SLC1A5,APLP2,MYLK,SCARB1,BCL6,MGLL,RAB34,BCKDHA,ACOX1,COL15A1,SSPN,TALDO1,SNCG,MIGA2,ESYT1,ESRRA,PFKL,UBC,ATP1B3,VEGFB,CD151,REEP6,CS,NKIRAS1,AGPAT3,COX8A,DNAJB9,STOM,FAH,GPX4,COQ5,PIM3,ETFB,ATL2,NDUFB7,SAMM50,ABCA1,YWHAG,APOE,RMDN3,HIBCH,GPD2,DLAT,REEP5,COQ3,PHYH,SLC27A1,DBT,ABCB8,CYC1,PGM1,DNAJC15,MGST3,RREB1,POR,CCNG2,AK2	h.Hallmark.Gene.Sets	0.730038	0.936101	0.057853	0.145292	0.891762	170	SLC1A5,ACOX1,ACLY,MGLL,SOWAHC,MIGA2,RAB34,ABCA1,BCKDHA,CS,AGPAT3,VEGFB,SAMM50,NMT1,PEX14,ADIG,UBC,JAGN1,ME1,PHLDB1,FZD4,ADCY6,SLC27A1,NDUFS3,CIDEA,CD151,UCP2,COX8A,ALDH2,STAT5A,ESYT1,PHYH,TKT,CRAT,BAZ2A	h.Hallmark.Gene.Sets
REACTOME_NUCLEAR_IMPORT_OF_REV_PROTEIN	0.00492402	0.147199	0.407018	-0.43089	-1.73993	33	NUP54,NUP155,NUP210,SEH1L,NUP35,KPNB1,NUP43,NUP98,POM121C,NUP58,NUP133,NUP214,RAE1,NUP42,TPR,NDC1,RANBP2,NUP37,NUP107,NUP160,NPM1	c2_curated.Canonical.Pathways	0.0536094	0.411345	0.321776	-0.345138	-1.49518	33	NUP155,RAN,SEH1L,NUP35,NUP37,NUP210,NDC1,NUP54,TPR,NUP133,RCC1,NUP153	c2_curated.Canonical.Pathways
WP_NRXN1_DELETION_SYNDROME	0.00494034	0.147199	0.407018	0.76445	1.86919	7	GRIN2D,GRIN3B,DLG4,GRIN1	c2_curated.Canonical.Pathways	0.353535	0.751176	0.0992333	0.412824	1.07299	7	GRIN3B,DLG4,NLGN3	c2_curated.Canonical.Pathways
GOBP_REGULATION_OF_OSTEOBLAST_DIFFERENTIATION	0.00496378	0.109879	0.407018	0.322967	1.59809	104	MEN1,GLI1,MIR200C,BMP4,JAG1,SMAD3,BMPR1B,HOXA2,DDX5,PTK2,ZHX3,BMP6,ACVR2B,TP63,CEBPB,NBR1,SOX9,WNT7B,IFITM1,PPP3CA,BMPR2,RUNX2,IL6R,LIMD1,MIR24-1,NOG,TRPM4,ATF4,HDAC7,FGFR2,PTCH1,FGF2,MIR98,IL6ST,ACVR2A,NOTCH1,WWTR1,JUND	c5_GO.Biological.Process	0.118143	0.536958	0.188204	-0.220219	-1.25846	104	MIR24-1,FBXO5,RUNX2,YAP1,MIR20A,MIR18A,MIR17,MIR93,MIR205,DNAI3,IGFBP5,MIR21,BAMBI,CDK6,JAG1,MIR30B,GLI3,CTNNBIP1,TP63	c5_GO.Biological.Process
GOBP_NEGATIVE_REGULATION_OF_CARDIOCYTE_DIFFERENTIATION	0.00497232	0.109879	0.407018	0.639686	1.82995	12	EGFR,DKK1,SOX6,PRICKLE1,MIR200B	c5_GO.Biological.Process	0.292157	0.70241	0.10925	-0.364392	-1.13728	12	EGFR,PRICKLE1	c5_GO.Biological.Process
GOBP_NEGATIVE_REGULATION_OF_CELL_ACTIVATION	0.00499449	0.109879	0.407018	0.305253	1.57034	132	AXL,THBD,LYN,ID2,SMAD7,PTPN6,BMP4,ARG2,NR1D1,BCL6,PDGFA,MIR125A,NRARP,SH2B3,CEBPB,PRKCD,EMILIN1,RUNX1,TNFAIP8L2,FOXJ1,SPI1,NCKAP1L,FOXP3,IL4I1,RHBDD3,PRKAR1A,ZBTB7B,TNFSF4,MDK,PDGFRA,CYGB,RASSF5,GCLC,LAG3,ZBTB46,APOE,PAWR,TBC1D10C,PIBF1,IL20RB,MARCHF7,CBLB	c5_GO.Biological.Process	0.0958647	0.487695	0.197822	0.212934	1.26478	132	AXL,PKN1,PTPN6,INHBA,CYGB,SMAD7,ZBTB7B,CEBPB,ALOX12,MERTK,LOXL3,MARCHF7,RABGEF1,GCLC,NR1H3,MDK,JAK3,CASP3,NCKAP1L,TYRO3,BMP4,MIR125A,TYROBP,PRKCD,CX3CL1,SOCS1,ADORA2A,DLG1,RHBDD3,SCRIB,TNFAIP8L2,LRRC32,LGALS9,BTK,BTN2A2,PDGFA,PRDX2,CBFB,NRARP,GLMN,GPER1	c5_GO.Biological.Process
GOBP_REGULATION_OF_LIPID_METABOLIC_PROCESS	0.00499974	0.109879	0.407018	0.261613	1.46806	233	TBL1XR1,CYP27B1,ADM,CAPN2,CTDNEP1,MIR192,H6PD,ATG14,ID2,TM6SF2,EGR1,IGF1R,NR1D1,CPT1A,SCARB1,PDGFA,ABCA2,TGFB1,RNF213,BMP6,MACROH2A1,BRCA1,PRKCD,NR3C1,MIR29B1,SOX9,TRIB3,FMC1,ACADVL,SREBF1,ATP1A1,APOA2,SPHK1,BGLAP,IRS1,NR1H2,DKK3,ABCA7,RPTOR,ABCD1,KAT5,IL1B,AGAP2,STUB1,DGKQ,DGKZ,PNPLA2,PDGFRA,SIRT3,AKT2,MID1IP1,NCOA2,ASAH1,PRKCE,ACACB,FGF2,APOE,MIR98,ETFBKMT	c5_GO.Biological.Process	0.0614507	0.414387	0.321776	0.199344	1.31285	244	NR3C1,MIR192,CTDNEP1,BRCA1,CLCN2,PPARA,TRIB3,AVIL,CREBL2,MACROH2A1,ABCA3,ABCG1,SPHK2,TGFB1,CAV1,EIF6,RPTOR,LONP2,PRKCE,NR1H3,ABCA7,SCAP,ABHD6,DGKZ,FGFR4,MTMR1,DHH,RDH10,FGF21,AKT2,ACADVL,ACER1,MLYCD,PRKCD,ADORA1,AMBRA1,SLC27A1,MIR9-1,MIR29B1,CIDEA,WNT4,PNPLA2,STAT5B,BSCL2,OGT,MLST8,TYSND1,GFI1,MFSD2A,MTLN,RNF213,FGF2,FGF19,CYP27B1,TM6SF2,LDLRAP1,ABCD1,DCAF5,FMO5,KAT5,MBTPS1,PDGFA,BBS4,PDE8B,GNB3,…	c5_GO.Biological.Process
GOBP_MECHANORECEPTOR_DIFFERENTIATION	0.00501908	0.109987	0.407018	0.40583	1.77388	53	TSKU,BMP4,JAG1,FZD2,JAG2,TPRN,ESRP1,SEC24B,TTC8,NTF4,WDPCP,MYCL,MYO6,GSDME,NTRK1,WHRN,TRIOBP,FGF2,PLS1,NOTCH1,USH2A,ATP8B1,MKS1	c5_GO.Biological.Process	0.101145	0.500558	0.193813	0.271954	1.33354	55	PAFAH1B1,JAG2,CECR2,TPRN,ESRP1,NAGLU,NOTCH1,MKS1,POU4F3,FZD2,BMP4,NTF4,TRIOBP,SCRIB,FGF2,MYO7A,NTRK1,SEC24B	c5_GO.Biological.Process
TFAP2 (AP-2) family regulates transcription of other transcription factors; datasource: reactome;	0.00507974	0.203331	0.407018	0.927043	1.67093	3	TFAP2A,CITED2,TFAP2C	PathwayCommons11	0.732252	0.950259	0.0607719	0.373884	0.777379	4	TFAP2A	PathwayCommons11
GOBP_REGULATION_OF_DNA_TEMPLATED_TRANSCRIPTION_IN_RESPONSE_TO_STRESS	0.00508005	0.111004	0.407018	0.457989	1.75946	34	NFE2L2,EGR1,CITED2,RPS6KA3,CEBPB,RELA,BAG3,JUN,TP53,MUC1,ATF4,ANKRD2,TMBIM6,ATF3,NCK1	c5_GO.Biological.Process	0.49503	0.816762	0.0793435	0.218509	0.953956	34	TMBIM6,CEBPB,ARNT,TP53,RELA,BAG3,NFE2L2,HIF1A,HMOX1,MUC1,ATF4,NCK1,EPAS1,VHL	c5_GO.Biological.Process
Notch.Signaling	0.00512052	0.0228454	0.407018	0.384927	1.66177	60	TBL1XR1,EGFR,JAG1,SMAD3,H2AX,PSMB7,RUNX1,UBC,MYC,JAG2,HDAC11,HDAC10,JUN,TP53,APH1B,PSMB2,CCND1,HDAC2,NOTCH1,MIB1,PSMB10,NOTCH3,EP300,CREB1,HEY1,DLL4,NUMBL,DTX4,LFNG,DTX3	NanoString_Genes	0.0885827	0.431548	0.2114	0.266681	1.34432	63	RBX1,CCND1,NOTCH3,JAG2,NOTCH1,ATP2A2,PSMB10,MYC,H2AX,HDAC11,HDAC10,TP53,UBC,CREBBP,DTX3,E2F1,DLL4,EP300,HDAC2,SKP1,PSMB5,HIF1A	NanoString_Genes
GOBP_NEGATIVE_REGULATION_OF_CELL_ADHESION	0.00514077	0.11201	0.407018	0.276345	1.51827	199	MBP,CLDN7,MIR192,ATP5F1B,PLXNB2,SMAD7,MIR141,PTPN6,BMP4,ARG2,CYP1B1,BCL6,JAG1,HOXA7,NF2,MIRLET7E,MIR125A,HSPG2,ERBB3,TGFB1,PTK2,CD164,BMP6,NRARP,SH2B3,CEBPB,PRKCD,YTHDF2,ABL1,RUNX1,SPRY4,TNFAIP8L2,FOXJ1,SPI1,NCKAP1L,FOXP3,IL4I1,PLXNB3,MAP4K4,PRKAR1A,ZBTB7B,TNFSF4,DMTN,MIR10A,EPHA4,DAB1,MDK,LAG3,MUC1,THBS1,MYADM,TACSTD2,SIPA1,ASS1,PAWR,SPINT2,WNK1,IL20RB,NOTCH1,MARCHF7,TNC,PLXNA3,MMP2,CBLB	c5_GO.Biological.Process	0.0196997	0.260084	0.352488	0.217782	1.39797	202	MIR192,SIPA1,MIR141,PTPN6,SMAD7,ZBTB7B,CLDN7,CEBPB,ALOX12,PPARA,LOXL3,MMP2,HOXA7,TGFB1,MARCHF7,NOTCH1,PLXNB2,WNK1,EPHA4,ABL1,MELTF,DUSP1,PLXNB1,SWAP70,MDK,JAK3,CASP3,ADAM15,NCKAP1L,PPM1F,BMP4,MIRLET7E,MIR125A,NF1,PLXNC1,ZNF703,PRKCD,FZD4,PLXNA2,CX3CL1,CDH1,PTPN11,MIR9-1,SOCS1,ADORA2A,ADAM10,SPINT2,ATP5F1B,DLG1,SCRIB,TNFAIP8L2,MIR10A,FXYD5,LRRC32,MUC1,B4GALNT2,LGALS9,BTN2A2,PRDX2,CBFB,NRARP,CLASP2…	c5_GO.Biological.Process
PID_PI3K_PLC_TRK_PATHWAY	0.00517307	0.152929	0.407018	0.457862	1.76932	31	BAD,EGR1,EPB41L1,PRKCD,YWHAZ,NRAS,KRAS,SFN,SHC1,CCND1,AGAP2,NTRK1,YWHAG,YWHAQ,PDPK1	c2_curated.Canonical.Pathways	0.192678	0.605134	0.137251	0.286744	1.2108	31	CCND1,BAD,SHC1,NRAS,YWHAZ,TRPC3	c2_curated.Canonical.Pathways
GOBP_EPITHELIAL_TUBE_BRANCHING_INVOLVED_IN_LUNG_MORPHOGENESIS	0.00517307	0.112273	0.407018	0.529177	1.81246	21	BMP4,HOXA5,SOX9,TBX2,KRAS,NKX2-1,EXT1,FGFR2,RDH10,TNC,ESRP2,FOXA1,YAP1	c5_GO.Biological.Process	0.042568	0.368431	0.321776	0.433763	1.64914	21	SPRY1,HOXA5,WNT2B,TBX2,RDH10,FOXA1,BMP4,CELSR1	c5_GO.Biological.Process
GOBP_ALCOHOL_CATABOLIC_PROCESS	0.00518229	0.112273	0.407018	0.532043	1.83957	22	MIOX,SCARB1,CYP46A1,TPI1,NUDT3,SNX17,APOE,GPD2,CYP39A1	c5_GO.Biological.Process	0.327309	0.731336	0.103576	0.297352	1.10365	20	MIOX,TPI1,NUDT3,ALDH2,ALDH3B2,SNX17,ALDH3B1,SULT1A2,SULT1A1	c5_GO.Biological.Process
ATP.binding.cassette.subfamily.A	0.00519483	0.315596	0.407018	0.702966	1.83459	9	ABCA2,ABCA10,ABCA5,ABCA7,ABCA1,ABCA17P,ABCA3	HUGO.Genes.groups	0.110891	0.691153	0.188204	0.522457	1.43737	8	ABCA3,ABCA17P,ABCA1,ABCA7	HUGO.Genes.groups
GOBP_TOR_SIGNALING	0.00523015	0.112815	0.407018	0.295992	1.54087	142	GPR137,UBR2,MAPKAP1,SESN1,AKT1S1,MIRLET7F1,LAMTOR1,STK11,PDCD6,SIK3,WDR24,YWHAZ,KPTN,FLCN,RICTOR,TSSK1B,NCKAP1L,LAMTOR2,OTUB1,TBCK,WDR59,RPTOR,SRMS,FBXO9,DGKQ,UBE2D1,MAPK3,PIM1,YWHAG,USP9X,SYAP1,ITFG2,SYK,RNF167,PRR5,RHEB,TBK1,MLST8,ARMH4,EP300,RPS6KB2,CTNS,USP32,ENDOG,ATXN3,USP7,TSSK3,TSC2,GOLPH3,GSK3A,PIH1D1,UBR1,CLEC16A,SPAAR,GATA3,STAMBPL1,LARS1,SIRT1,PRKAA2,PINK1,CSNK1A1,DYRK3,LARP1	c5_GO.Biological.Process	0.00420383	0.128833	0.407018	0.268986	1.63439	145	RBX1,MAPKAPK5,KPTN,USP7,GSK3A,RPS6KB2,TBK1,GPR137,RFFL,RPS6KB1,CLEC16A,FAM83D,GAS6,CSNK1A1,YWHAZ,RNF167,RPTOR,LAMTOR2,LARP1,BMAL1,UBE2W,CARD11,UBR2,PRR5,NCKAP1L,EIF4EBP1,NPRL3,FNIP1,USP9X,CUL3,ATXN3,STK11,TSSK6,FLCN,LAMTOR3,OTUB1,RRAGD,SRMS,MLST8,AKT1S1,EP300,LAMTOR4	c5_GO.Biological.Process
GOBP_REGULATION_OF_STEROID_HORMONE_BIOSYNTHETIC_PROCESS	0.00524548	0.112815	0.407018	0.635736	1.84625	13	H6PD,IGF1R,BMP6,NR3C1,ATP1A1,DKK3,DGKQ	c5_GO.Biological.Process	0.317073	0.723398	0.106323	0.357444	1.11404	12	NR3C1,CLCN2,WNT4,PDE8B	c5_GO.Biological.Process
GOBP_NEGATIVE_REGULATION_OF_PROTEIN_METABOLIC_PROCESS	0.00525166	0.112815	0.407018	0.208929	1.31532	739	QRICH2,GABARAPL2,TIMP2,DPEP1,MEN1,HEXIM1,PTPA,MIR192,EGFR,INPP5E,CACTIN,SERBP1,NOL3,LYN,PARP10,ATG14,SMAD7,ZFP36L2,TFAP4,EFNA1,MIR200C,PTPN6,ANXA2,FLOT2,CAPN3,CDKN1B,DKK1,PTPN13,RGP1,CIRBP,AKT1S1,NOP53,CBLC,SET,MIRLET7A1,NF2,MIRLET7E,MIR125A,PML,SMAD3,FKBP8,CAPRIN2,MOV10,TGFB1,MIR151A,TESK1,ISG15,SPAG9,RARA,MIR15A,MIR16-1,DAB2IP,DCP1A,RPS6KA3,PPP1R1B,AIDA,MIR101-1,MACROH2A1,CLN3,EXOSC3,IVNS1ABP,R…	c5_GO.Biological.Process	0.00239757	0.0945544	0.431708	0.184444	1.36847	733	BCL2L12,SERPINB9,MIR192,CAPRIN1,PKN1,TNRC6B,USP7,MIR200C,PTPN6,ISG15,TERF2IP,SPRY1,MOV10,MIR149,NIBAN1,TBC1D24,SMAD7,ZFP36,RFFL,DDX3X,UBXN1,SIRT7,ADNP,AZIN1,SAMD4A,INCA1,BRCA1,MIR195,MIR497,TPPP,FKBP8,PAX2,CSDE1,U2AF2,CIRBP,RBM4,TRIB3,GAS6,RGP1,MIR455,CTDSP2,CLN3,HEXIM1,BAX,MACROH2A1,CHMP6,GGA3,PRKAR1B,BANP,LRP1,ZFYVE28,TGFB1,CAV1,MARCHF7,USP47,DCP1A,NHLRC1,PAN2,CNKSR3,RABGEF1,EIF6,PSME3IP1,GCLC,…	c5_GO.Biological.Process
Sterile.alpha.motif.domain.containing.MicroRNA.protein.coding.host.genes	0.00526481	0.315596	0.407018	-0.974149	-1.51979	2	PHC2	HUGO.Genes.groups	0.892495	0.978287	0.0515309	0.388632	0.637174	2	STIM1,PHC2	HUGO.Genes.groups
GOBP_PROTEOLYSIS	0.00530476	0.113521	0.407018	0.194475	1.26517	1181	QRICH2,TBL1XR1,GABARAPL2,BAD,LDLRAD3,ADRM1,TIMP2,HM13,DPEP1,CTSD,MBP,PRSS27,UBR2,CAPN2,CHFR,RHOBTB3,UBE2R2,CPA4,HTRA4,GABARAP,FBXL18,THBD,FBXL5,NOL3,LYN,KEAP1,MAEA,TINAGL1,NFE2L2,SMAD7,CUL7,KLHDC2,EFNA1,ABHD17B,MAST4,SCRN3,ANXA2,FBXW2,ADAM11,CAPN3,TRABD2B,STOML2,CAPN1,USP40,TRABD2A,SYVN1,NR1D1,NOP53,CARD9,ECE1,KLK8,KLK9,CBLC,TMEM259,PML,SMAD3,NLRP1,TGFB1I1,TGFB1,PTK2,NGLY1,ISG15,FBXL22,USP3,CHMP7…	c5_GO.Biological.Process	8.26007e-06	0.00315163	0.593325	0.191646	1.48668	1180	RBX1,GABARAP,PSMC3,BCL2L12,SERPINB9,RNF26,SENP3,UBE2R2,CUL7,ATXN7L3,USP7,GSK3A,SPPL2B,USP21,ISG15,UHRF1,PSMB6,RHBDD2,UBE2L3,DPP9,MKRN2,CACUL1,SPSB3,DNAJB12,ADAM11,BAD,USP5,FZR1,SMAD7,RFFL,DDX3X,UBXN1,SPATA2,ECE1,CARD9,GSN,RNF4,TMEM259,CALR3,RNFT1,MIR195,ZFAND2A,CTSK,TPSG1,TPSB2,CHFR,PAX2,DDA1,TRIM9,SUMO2,USP19,TRIB3,GAS6,NPEPL1,GID4,CLN3,MMP23B,RNF166,BAX,MAEA,PCNP,RNPEPL1,CHMP6,CCNF,NAGLU,HTRA2,…	c5_GO.Biological.Process
WP_APOPTOSIS_MODULATION_AND_SIGNALING	0.00531242	0.1555	0.407018	0.344532	1.63482	79	BAD,TNFRSF1A,PTPN13,MIR29B1,TNFRSF25,MAPK8,CFLAR,IKBKB,NFKBIA,MCL1,ADAMTSL4-AS1,BAG3,IL1R1,CAPNS1,BAX,BAK1,JUN,TP53,FOS,CASP6,CASP8,TNFRSF10D,BCL2L10,CASP10,RIPK1,MAPK3,TNFRSF6B	c2_curated.Canonical.Pathways	0.192229	0.604994	0.142057	0.220346	1.17735	77	MCL1,ADAMTSL4-AS1,BAD,BAX,HTRA2,TNFRSF25,MADD,BCL2L11,CASP3,CAPNS1,DFFA,TP53,TNFRSF10A,FOS,TNFRSF10D,MIR29B1,TRADD,IRAK1,BAG3,MAPK3,CASP9,BIK,TNFRSF1A,DIABLO,MAP3K5	c2_curated.Canonical.Pathways
GOBP_ESTABLISHMENT_OF_SKIN_BARRIER	0.00531432	0.113521	0.407018	0.50155	1.80435	26	LSR,PLEC,MET,CYP26B1,TP63,ELOVL1,GRHL3,SFN,NFKBIZ,SRF,CYSRT1,ALOXE3	c5_GO.Biological.Process	0.496016	0.816762	0.0793435	0.241589	0.969684	26	ALOX12B,ALOX12,ELOVL1,LSR,ALOXE3,GRHL1,NFKBIZ,KRT16	c5_GO.Biological.Process
WP_KLEEFSTRA_SYNDROME	0.00534224	0.1555	0.407018	0.506276	1.84496	25	NCOA6,SMARCD2,MBD5,ARID1B,ARID1A,EHMT1,RXRA,SMARCC1,H3-3B,ASXL1,SMARCC2,SMARCD1,KDM6A	c2_curated.Canonical.Pathways	0.910387	0.968753	0.0508054	-0.173378	-0.690617	27	ARID1B,ARID1A,SMARCC1,BAP1,ASXL1,PAXIP1,H3-3A	c2_curated.Canonical.Pathways
GOBP_CELLULAR_RESPONSE_TO_INSULIN_STIMULUS	0.00534952	0.113954	0.407018	0.280502	1.50077	166	CTSD,ZNF106,RHOQ,SP1,IGF1R,SH2B2,FUT7,TNS2,USF1,SOS2,PRKCD,SLC27A4,PKM,CAV2,TRIB3,CFLAR,RELA,SLC9A1,SREBF1,PTPN1,GRB7,SHC1,GPT,PRKCZ,BGLAP,IRS1,NCOA5,ZNF592,ZBTB7B,ZFP36L1,IL1B,SMARCC1,BCAR1,CAPN10,AKT2,GCLC,NCOA2,RAB10,MAPK3,YWHAG,INPP5K,SYAP1,NAMPT,PIK3R3,VWA2,PDPK1,CPEB2,NCK1,MIR15B,RAB8A,RAF1,PRKCI,SLC27A1,ZDHHC7,PIK3R2,HDAC9,RBM4,SNX5,SIK2,TSC2,GNAI2,GSK3A,VAMP2,PHIP,MIR107,C2CD5,GPR21,SIRT1…	c5_GO.Biological.Process	0.625	0.867412	0.0714786	-0.148835	-0.936334	170	PIK3R3,HDAC5,STAT1,INSIG2,IGF1R,NAMPT,PRKAA1,BAIAP2,VAMP2,YWHAG,APPL1,MIR103A1,SIK2,VWA2,NCL,NCOA2,ZDHHC7,SOS1,AHSG,SORBS1,PTPN1,PIK3CA,PARP1,SORL1,SELENOS,GKAP1,PRKCQ,C2CD5,GPR21,EIF4EBP2,SMARCC1,ATP2B1	c5_GO.Biological.Process
PDGF signaling pathway; datasource: panther;	0.0053635	0.211748	0.407018	0.318169	1.58759	105	PIK3CD,USF2,MAPK10,PDGFA,SOS2,RPS6KA3,JAK1,GABPA,MAPK8,NRAS,STAT6,IKBKB,MYC,RPS6KA2,PKN2,ITPR3,SHC1,JUN,FOS,MKNK1,ARHGAP26,ARHGAP4,PDGFRA,AKT2,SRF,RPS6KA4,MAPK3,PRKCA,FLI1,SRGAP1,PIK3R3,ITPR2,PDPK1,ARHGAP8,NCK1,ARHGAP12,MAPK6,RAF1,RPS6KB2,ELF4,PIK3R2,MKNK2,ARHGAP1	PathwayCommons11	0.122905	0.638905	0.172324	0.220277	1.23948	107	ERF,GSK3A,RPS6KB2,ELK4,SHC1,RPS6KB1,NRAS,MKNK2,STAT6,ELF1,MYC,PIK3R2,RPS6KA4,ARHGAP8,VAV1,JAK3,USF2,ARHGAP5,RPS6KA2,MAPK6,ITPR2,AKT2	PathwayCommons11
GOBP_NEGATIVE_REGULATION_OF_INTERLEUKIN_6_MEDIATED_SIGNALING_PATHWAY	0.00543048	0.115183	0.407018	0.734472	1.75715	7	MIRLET7A1,MIRLET7E,MIR125A,MIR26A1,MIR98	c5_GO.Biological.Process	0.062753	0.418226	0.257206	0.566276	1.52563	8	MIRLET7E,MIR125A,MIRLET7C,MIR99A,MIR26A1,MIR98,PTPN2	c5_GO.Biological.Process
KEGG_MEDICUS_REFERENCE_KINETOCHORE_MICROTUBULE_ATTACHMENT	0.00544232	0.157204	0.407018	0.614702	1.80805	13	BUB1B,TUBA1B,TUBB6,CENPE,TUBA4A,TUBB4B,TUBA1C	c2_curated.Canonical.Pathways	0.0634921	0.424634	0.252961	0.438165	1.46415	15	TUBB6,TUBB4B,BUB1B,TUBA1C,TUBA4A,CENPE,TUBB2B	c2_curated.Canonical.Pathways
GOBP_PULMONARY_VALVE_DEVELOPMENT	0.00545453	0.115183	0.407018	0.606445	1.82183	14	TNFRSF1A,BMP4,JAG1,BMPR2,NFATC1,SMAD2,NOTCH1,HEY1,SLIT2,TGFB2,TNFRSF1B	c5_GO.Biological.Process	0.805395	0.935305	0.0538979	-0.206349	-0.731041	17	JAG1,SMAD2,RBPJ,HEYL	c5_GO.Biological.Process
GOBP_REGULATION_OF_CELL_CYCLE_G1_S_PHASE_TRANSITION	0.00545925	0.115183	0.407018	0.284629	1.51454	161	SMARCD2,EGFR,ID2,GLI1,PTPN6,CDKN1B,ACTB,PML,MIR15A,MIR16-1,RPL26,ATP2B4,MIR29A,MIR29B1,NACC2,KMT2E,CACNB4,MBLAC1,TBX2,CTDSPL,MIR26A1,ARID1B,MDM2,ARID1A,RBL2,FBXO31,PLK3,DACT1,TP53,CCND1,DPF2,RPTOR,ANKRD17,CDC73,MIR10A,SMARCC1,GJC2,ARID2,CTDSP1,MIR873,MUC1,PLK5,CCND2,DCUN1D3,CUL4A,PAF1,MYO16,TRIAP1,SOX2,SDE2,MIR15B,SMARCC2	c5_GO.Biological.Process	0.0182143	0.249989	0.352488	0.233528	1.45992	168	CCND1,WEE1,PTPN6,INHBA,DDX3X,FAM83D,CTDSP2,DPF1,ACTB,RPTOR,MIR15A,MIR16-1,GTSE1,CDK2,RFWD3,PSME3,DPF2,RBL2,MIR638,SOX2,MEPCE,TP53,TBX2,APBB1,CTDSP1,SMARCE1,BCL7B,GJC2,NACC2,CDKN2D,E2F1,AMBRA1,MIR29A,MIR29B1,SMARCD2,DDRGK1,KANK2,GIGYF2,ACTL6B,SMARCA2,MIR193A,TAF1,DLG1,PLK5,RRM1,MTBP,MIR10A,RPL26,GFI1B,PPP2CA,PRAP1,ADAM17,CACNB4,MUC1,BTN2A2,DCUN1D3,KMT2E,PBRM1,FBXW7,FHL1,CUL4A,PAGR1	c5_GO.Biological.Process
GOBP_NEURAL_TUBE_FORMATION	0.00546767	0.115183	0.407018	0.339789	1.62838	87	ADM,IFT122,PLXNB2,PTK7,BMP4,LMO4,TGFB1,STK4,RARA,CITED2,FZD2,PRICKLE1,ABL1,GRHL3,DVL1,GRHL2,LUZP1,KIF20B,SEMA4C,SEC24B,RARG,ARHGAP35,NOG,PTCH1,SALL4,SPINT1,SPINT2,PFN1,STK3,MTHFR,TCTN1,MIB1,FUZ,MKS1,APAF1,TEAD2,OVOL2,TSC2,TGFB2,KDM2B	c5_GO.Biological.Process	0.000398821	0.0301138	0.498493	0.3383	1.85828	90	DVL2,PTK7,CLUAP1,CECR2,PAX2,KAT2A,TGFB1,PTCH1,FZD1,PLXNB2,PFN1,ABL1,MKS1,RARG,CASP3,GRHL2,FZD2,OVOL2,VASP,KDM2B,SEMA4C,BMP4,CELSR1,MED12,FUZ,SPINT2,LMO4,SCRIB,ST14,TSC1,SEC24B,BMP7,HIF1A,FZD3,BBS4,SPINT1,GLMN,NOG,TULP3,MTHFR,STK3,HECTD1,DVL3,IFT57,TSC2	c5_GO.Biological.Process
AndrogenReceptor; datasource: netpath;	0.00549201	0.213891	0.407018	0.28864	1.51386	140	PAK6,NRIP1,NCOA6,EGFR,SP1,RAC3,CDK11B,SMAD3,PA2G4,TGFB1I1,DDX5,PTK2,ETV5,TGIF1,BRCA1,NR3C1,RUNX1,GAPDH,RACK1,GTF2F1,MDM2,PRDX1,RNF4,PELP1,ERCC2,JUN,PXN,CCND1,NCOA3,KAT5,SMARCC1,STUB1,RUNX2,CASP8,POU2F1,NCOA2,HDAC7,PPP1CA,SENP1,HSP90B1,IL6ST,ZMIZ2,HSPA8,EP300,PRMT1,DBT,FOXA1,PIK3R2,HIPK3,PIAS3,HSP90AA1,CREB1,PATZ1,NSD1,NONO,NSD2,UBE2I	PathwayCommons11	0.11032	0.624034	0.17822	0.207407	1.22331	143	CCND1,NR3C1,NR2C2,PRMT1,GSN,RNF4,PSMC3IP,BRCA1,ARNT,GTF2F1,TOP1,CAV1,NSD1,HDAC7,SVIL,BAG1,PIK3R2,HSP90AA1,CASP3,CDC37,PAK6,CREBBP,TGIF1,FOXA1,SMARCE1,NONO,ZMIZ2,GAPDH,HSPA8,XRCC6,ERCC2,PIAS4,EP300,NCOR2,PXN,NCOA1,SLC25A4,KAT5,RNF6,IL6ST,NELFCD,PATZ1,CEBPA	PathwayCommons11
REACTOME_NUCLEAR_PORE_COMPLEX_NPC_DISASSEMBLY	0.00550972	0.157945	0.407018	-0.431128	-1.78354	35	NUP54,NUP155,NUP210,SEH1L,NUP35,CDK1,NUP43,NUP98,POM121C,NEK6,NUP58,NUP133,NUP214,RAE1,NUP42,TPR,NDC1,RANBP2,NUP37,CCNB2,CCNB1,NUP107	c2_curated.Canonical.Pathways	0.0533683	0.411186	0.321776	-0.345816	-1.51123	35	NUP155,CDK1,SEH1L,NUP35,NUP37,NUP210,NDC1,NUP54,TPR,NUP133,NUP153,NEK6,NUP88	c2_curated.Canonical.Pathways
GOBP_POSITIVE_REGULATION_OF_MACROPHAGE_DIFFERENTIATION	0.00552712	0.116115	0.407018	0.634201	1.84179	13	ID2,TGFB1,CSF1,CASP8,HCLS1,RIPK1,PRKCA	c5_GO.Biological.Process	0.535714	0.834293	0.0751182	0.281832	0.912035	13	HCLS1,TGFB1,LIF,IL34,RIPK1,RB1	c5_GO.Biological.Process
GOBP_NEGATIVE_REGULATION_OF_CELL_CYCLE_G1_S_PHASE_TRANSITION	0.00558273	0.116576	0.407018	0.35292	1.6532	78	CDKN1B,PML,MIR15A,MIR16-1,RPL26,MIR29A,MIR29B1,NACC2,CACNB4,CTDSPL,MIR26A1,MDM2,RBL2,FBXO31,PLK3,DACT1,TP53,CCND1,CDC73,MIR10A,GJC2,CTDSP1,MIR873,MUC1,DCUN1D3,MYO16,TRIAP1,SOX2,SDE2,MIR15B,CRADD,PIDD1,CTDSP2	c5_GO.Biological.Process	0.0103054	0.198564	0.38073	0.301402	1.60279	80	CCND1,WEE1,INHBA,CTDSP2,MIR15A,MIR16-1,GTSE1,CDK2,RFWD3,RBL2,MIR638,SOX2,TP53,APBB1,CTDSP1,GJC2,NACC2,CDKN2D,MIR29A,MIR29B1,KANK2,GIGYF2,MIR193A,DLG1,MIR10A,RPL26,GFI1B,PRAP1,CACNB4,MUC1,BTN2A2,DCUN1D3,FHL1,PKD2,CTDSPL,MIR26A1,RB1	c5_GO.Biological.Process
GOBP_RESPIRATORY_SYSTEM_DEVELOPMENT	0.00558553	0.116576	0.407018	0.287547	1.52787	156	GNG8,NKX2-8,FOSL2,PTK7,GLI1,BMP4,SMCHD1,PDGFA,HOXA5,ITGB6,RARA,ACVR2B,PTGES3,LTA4H,ALDH1A3,SOX9,THRB,TBX2,IFT25,GRHL2,SREBF1,WNT7B,KRAS,NKX2-1,FOXJ1,NKIRAS1,MSX1,PLOD3,SEC24B,BMPR2,RARG,PDGFRA,ATXN1L,EXT1,SRF,NOG,HIPK2,WDPCP,FGFR2,MAPK3,PPP1CA,NFIB,FGF2,WNT11,ASS1,HOPX,LAMA5,ASXL1,RDH10,SMAD2,NOTCH1,CDC42,TNC,ESRP2,SIM2,EP300	c5_GO.Biological.Process	0.0169183	0.246625	0.352488	0.234131	1.45637	164	NKIRAS2,PTK7,SPRY1,CLCN2,ABCA3,LOXL3,HOXA5,ACVR2B,NOTCH1,ODAD4,LHX3,SRSF6,ATXN1L,ADAMTS2,WNT7B,LIF,STK40,ALDH1A3,RARG,SIX4,WNT2B,GRHL2,TBX2,RDH10,HEG1,JMJD6,FOXA1,BMP4,CELSR1,CDC42,RCN3,FGFRL1,WNT11,THRB,PTGES3,MECP2,TGFBR2,ERRFI1,EP300,ITGA3,FGF2,SEC24B,MAPK3,LOX,FGFR2,PDGFA,CEBPA,FBXW7,BMPR2,TAB1,SLC23A1,MSX1,TIMELESS,LTA4H,NOG,MAN1A2,TULP3,TGFB3,DNAAF1,LTBP3,GNG8,EPAS1,WDPCP,MAP2K2,SREBF1,DAG1…	c5_GO.Biological.Process
GOBP_TRANSMEMBRANE_RECEPTOR_PROTEIN_TYROSINE_KINASE_SIGNALING_PATHWAY	0.00559491	0.116576	0.407018	0.227309	1.37384	453	AXL,MMRN2,CTSD,ZNF106,PTPN18,EGFR,PIK3CD,LYN,RHOQ,SGPL1,EFNA1,ERCC1,MIR200C,IGF1R,NPR2,AKT1S1,SH2B2,MET,CBLC,PDGFA,RALB,FUT7,TNS2,BTC,ERBB3,FRS3,ZFAND5,TGFB1,PTK2,MBD5,SOS2,MIR16-1,DAB2IP,JAK1,KIF16B,FGF5,PRICKLE1,SH2B3,PDCD6,PRKCD,SLC27A4,SIPA1L1,ABL1,MIR29A,SOX9,CAV2,LRIG2,IGFBP4,EMILIN1,SOCS2,TBX2,STAT6,MIR26A1,RELA,NEDD4,SREBF1,GPRC5A,VEGFB,PTPN1,SPRY4,NDST1,RHBDF2,GRB7,SHC1,NGFR,ERCC2,NUP62,…	c5_GO.Biological.Process	6.82009e-05	0.00981964	0.538434	0.227059	1.62386	479	AXL,GSK3A,MIR200C,SPRY1,GPC1,MIR149,SHC1,ZBTB7B,RPS6KB1,MIR195,ARNT,EPHA10,RBM4,NPR2,MERTK,FUT7,ARID5B,WASF1,CHMP6,FOXC2,MMP2,FLRT1,LRP1,STAT6,ZFYVE28,TGFB1,DOK4,PDGFC,MVB12B,PRKD2,ZNF592,CD4,RABGEF1,FAM83C,MIR16-1,MIR10B,PPP2R5B,EPHA4,VEGFB,ABL1,CDH3,PIK3R2,INSRR,CHURC1,SHKBP1,VAV1,NTF3,MIR638,JAK3,SH2D6,MST1R,CASP3,MIR1224,FGFR4,PILRB,EFNB3,SPRY3,TBX2,EFNA1,EFNA4,FGF21,MVB12A,ERCC1,RASGRP4,SNX5…	c5_GO.Biological.Process
PID_FRA_PATHWAY	0.00561437	0.159735	0.407018	0.48139	1.80422	28	FOSL2,THBD,USF2,SP1,NFATC2,JUNB,BGLAP,JUN,CCND1,ATF4,NFATC1,MMP2,JUND,EP300	c2_curated.Canonical.Pathways	0.13189	0.547082	0.170932	0.327588	1.30294	26	CCND1,NFATC3,MMP2,JUND,ITGB4,LIF,USF2,EP300,HMOX1,ATF4,PLAUR	c2_curated.Canonical.Pathways
GOBP_POSITIVE_REGULATION_OF_LYMPHOCYTE_ACTIVATION	0.00563102	0.117009	0.407018	0.269656	1.49925	212	BAD,AXL,SMARCD2,LYN,PTPN6,FLOT2,AP3D1,ACTB,BCL6,CLCF1,SOX12,TGFB1,DHPS,RARA,SHLD1,EXOSC3,SHB,RHOH,KMT5B,ABL1,RUNX1,KMT5C,STAT6,CD27,NFATC2,CORO1A,ARID1B,NFKBIZ,ARID1A,TNFSF13,PPP3CA,KITLG,SOX13,SPI1,NCKAP1L,FOXP3,IL4I1,PRKCZ,ZBTB7B,EFNB3,TNFSF4,KAT5,IL1B,SMARCC1,ARID2,MDK,AP1G1,CCDC88B,IL15RA,TOX,HMCES,PDPK1,PCID2,CD24,TNFRSF4,SYK,IL6ST,NCK1,SMARCC2	c5_GO.Biological.Process	0.344383	0.737595	0.095288	0.161807	1.04658	217	AXL,BLOC1S3,TNFSF13,PTPN6,BAD,ZBTB7B,CD320,GAS6,STAT6,TGFB1,TNFSF9,CAV1,TNFRSF13C,CD4,DHPS,ACTB,HSPD1,AP3D1,RASAL3,ABL1,CCDC88B,CARD11,XBP1,VAV1,MDK,EFNB3,NCKAP1L,RASGRP1,SMARCE1,TYROBP,NFKBID,AMBRA1,FLOT2,PTPN11,CD47,SOCS1,XRCC6,STAT5B,SMARCD2,TGFBR2,ACTL6B,SMARCA2,SLC7A1,KMT5C,MALT1,KMT5B,ADAM8,HSPH1,CLCF1,EXOSC6,EXOSC3,SHB,PRKCZ,KAT5,LGALS9,BTK,BTN2A2,IL6ST,PBRM1,PCID2,CBFB,TFRC,AP1G1,NLRP3,RI…	c5_GO.Biological.Process
GOBP_MUSCLE_ORGAN_MORPHOGENESIS	0.00566606	0.117417	0.407018	0.398249	1.74402	56	SMAD7,TNNT2,BMP4,MYLK,EFEMP2,TGFB1,TCAP,FZD2,TNNI3,MYBPC3,PKP2,SERP1,MYL11,ARID5B,NOG,FGFR2,TPM1,ENG,S1PR1,TGFBR1,NOTCH1,FKBP1A,TGFBR3,MED1,TBX1,FOXC1,ZFPM2,DLL4,NAGLU,TGFB2,MYL3	c5_GO.Biological.Process	0.00378281	0.11986	0.431708	0.348593	1.72677	58	SMAD7,MIR195,ARID5B,FOXC2,NAGLU,TGFB1,NOTCH1,FZD1,LIF,FKBP1A,ZFPM1,FZD2,HEG1,BMP4,MED1,TBX1,FOXC1,DLL4,TCAP,TNNT2,MYL3,EFEMP2,NKX2-5,MYL11,S1PR1,FGFR2,ADARB1,NOG,DSP,ISL1,MYH6	c5_GO.Biological.Process
RAF/MAP kinase cascade; datasource: reactome;	0.00568602	0.216575	0.407018	0.348925	1.61698	72	EGFR,SPTB,MET,PDGFA,CSF2,BTC,ERBB3,FRS3,GRIN2D,PTK2,JAK1,FGF5,SPTBN5,NRAS,DLG4,KRAS,GRIN1,KITLG,SHC1,IRS1,FGF17,PDGFRA,FGFR2,MAPK3,FGF2	PathwayCommons11	0.64794	0.93409	0.0628004	0.173431	0.905247	77	DLG3,SHC1,LAT,NRAS,SPTBN4,JAK3,FGFR4,RASGRP4,RASGRP1,DLG4,DLG1,DLG2,RET,FGF2,FGF19,MAPK3,FRS2,FGF22,FGFR2,SPTAN1,PDGFA,FGFR3,RANBP9	PathwayCommons11
GOBP_NEGATIVE_REGULATION_OF_INTRACELLULAR_SIGNAL_TRANSDUCTION	0.0057148	0.118106	0.407018	0.223986	1.35772	463	MEN1,UBR2,MAPKAP1,MECOM,CACTIN,NOL3,LYN,NFE2L2,SMAD7,EFNA1,MIR200C,PTPN6,SESN1,IGF1R,SYVN1,AKT1S1,NR1D1,NOP53,BCL6,MET,CBLC,MIRLET7F1,NF2,STMN3,TPT1,HAPSTR1,MGRN1,MIR15A,MIR16-1,DAB2IP,PMEPA1,DGKG,AIDA,STK11,SH2B3,PDCD6,IVNS1ABP,RHOH,PRKCD,CAVIN3,ATP2B4,ABL1,MIR29A,MIR29B1,WDR24,YWHAZ,KPTN,EMILIN1,PTTG1IP,PYCR1,MIR26A1,RELA,CD22,MYC,YBX3,RACK1,FLCN,NLRX1,NHERF4,PTPN1,MDM2,SPRY4,SOD2,TSSK1B,SPI1,R…	c5_GO.Biological.Process	0.0561224	0.403066	0.248911	0.174171	1.23923	453	PRMT1,TMBIM6,MAPKAPK5,KPTN,USP7,PAFAH1B1,GSK3A,MIR200C,PTPN6,FAM89B,SPRY1,MKRN2,TBK1,MIR149,SMAD7,RFFL,DDX3X,MIR195,MIR497,PPARA,SOD2,HTRA2,ELL3,LRP1,CAV1,MARCHF7,HDAC7,USP47,CNKSR3,ZNF385A,YWHAZ,PDE2A,RABGEF1,MYC,RNF167,FZD1,LIF,QARS1,MIR15A,MIR16-1,BMAL1,EPHA4,MEN1,RASAL3,ABL1,PIK3R2,ASH1L,ARHGEF2,UBE2W,ABCA7,PSCA,DUSP1,UBR2,XBP1,CCAR2,MIR34A,SPRY3,ZMYND11,EFNA1,MFN2,HAPSTR1,HEG1,NPRL3,USP10,MI…	c5_GO.Biological.Process
GOBP_EPIDERMIS_MORPHOGENESIS	0.00579709	0.119052	0.407018	0.497043	1.76556	25	WNT10A,FOXE1,TP63,NGFR,SOSTDC1,PLOD3,GORAB,KRT17,EXT1,FGFR2,NOTCH1,FST,NAGLU,TGFB2,FOXQ1,SNAI1	c5_GO.Biological.Process	0.428008	0.783244	0.086795	-0.251166	-1.0347	28	KRT17,BCL2,IGFBP5,ATP7A,TP63	c5_GO.Biological.Process
GOBP_CARDIAC_CHAMBER_DEVELOPMENT	0.00584306	0.119052	0.407018	0.307273	1.56813	121	SMAD7,PTK7,PPP1R13L,TNNT2,BMP4,IGF1R,JAG1,LMO4,TGFB1,CITED2,FZD2,TBX2,GRHL2,DHRS3,LUZP1,MDM2,TNNI3,NDST1,MYBPC3,PKP2,TP53,BMPR2,SRF,NOG,SNX17,FGFR2,TPM1,NRP1,WNT11,ENG,SALL4,TGFBR1,NOTCH1,FKBP1A,TGFBR3,MED1,TBX1,FOXC1,ADGRG6,ZFPM2,MKS1,HEY1,DLL4,SLIT2,NSD2,MDM4,OVOL2,NAGLU,TGFB2,GSK3A,MYL3,TAB1,GATA3,RBM15,MATR3,ZFPM1	c5_GO.Biological.Process	0.0212319	0.270035	0.352488	0.243372	1.44557	132	PTK7,GSK3A,SMAD7,FOXC2,NAGLU,TGFB1,NOTCH1,PDE2A,FZD1,FKBP1A,MKS1,TP53,ZFPM1,CRELD1,GRHL2,TBX2,FZD2,HEG1,NPRL3,PPP1R13L,OVOL2,BMP4,MED1,TBX1,FGFRL1,WNT11,SMO,FOXC1,TGFBR2,DLL4,DAND5,LMO4,ADPRHL1,TNNT2,CPE,MYL3,BMP7,NKX2-5,SMAD6,FRS2,HIF1A,SNX17,FGFR2	c5_GO.Biological.Process
Nuclear Pore Complex (NPC) Disassembly; datasource: reactome;	0.00584999	0.216575	0.407018	-0.424841	-1.73964	34	NUP54,NUP155,NUP210,SEH1L,NUP35,CDK1,NUP43,NUP98,POM121C,NEK6,NUP58,NUP133,NUP214,RAE1,TPR,NDC1,RANBP2,NUP37,CCNB2,CCNB1,NUP107	PathwayCommons11	0.0203428	0.572801	0.352488	-0.354783	-1.55734	34	NUP155,CDK1,SEH1L,NUP35,NUP37,NUP210,NDC1,NUP54,TPR,NUP133,NUP153,NEK6,NUP88	PathwayCommons11
GOBP_RESPONSE_TO_NITROGEN_COMPOUND	0.00585304	0.119052	0.407018	0.207159	1.31291	785	HM13,SCNN1A,DPEP1,CTSD,UBR2,ZNF106,ADM,CAPN2,FOSL2,EGFR,THBD,LYN,RHOQ,NFE2L2,SP1,FOSB,MIR200C,CDKN1B,SESN1,ACTB,NR4A2,INAVA,EGR1,IGF1R,NPR2,SYVN1,SH2B2,NSMF,CPT1A,CYP1B1,CARD9,NT5E,JAG1,TMEM259,MIRLET7F1,RALB,FUT7,TNS2,RECQL5,NLRP1,TGFB1,USF1,PTK2,NGLY1,BRIP1,MBD5,LAMTOR1,SOS2,PPP1R1B,JAK1,STK11,RAP1GDS1,FAF1,LTA4H,P2RX4,CEBPB,BRCA1,C5AR1,PRKCD,SLC27A4,GNAS,ATP2B4,ABL1,PKM,SOX9,CAV2,UBE4A,TRIB3,M…	c5_GO.Biological.Process	0.0725806	0.434388	0.2114	0.154724	1.15921	803	RBX1,IRF3,TMBIM6,PALM,CD68,PRMT5,GSK3A,MIR200C,SLC2A1,INHBA,RHBDD2,DNAJB12,SHC1,TRIM41,UBXN1,ACHE,ZBTB7B,CARD9,CEBPB,NDUFS4,TMEM259,CALR3,RNFT1,RPS6KB1,BRCA1,MIR195,AGRN,CTSK,OGG1,PPARA,USP19,RBM4,TRIB3,NPR2,MIR455,ANO1,FUT7,CTNNA1,AGTRAP,FOXC2,AUP1,MMP2,HTR1D,LRP1,STAT6,ABCA1,TGFB1,USF1,CAV1,NOTCH1,ITGB2,PDGFC,STC2,SRSF6,GNRHR2,ZNF592,PDE2A,EIF6,ACTB,GCLC,RPTOR,FOSB,PRKCE,LAMTOR2,BCL11A,CHMP5,ZC…	c5_GO.Biological.Process
GOBP_REGULATION_OF_GLUCOCORTICOID_METABOLIC_PROCESS	0.00585306	0.119052	0.407018	0.698522	1.81531	9	H6PD,NR3C1,ATP1A1,DKK3,STUB1,DGKQ	c5_GO.Biological.Process	0.394309	0.765693	0.0931455	0.358875	1.05535	10	NR3C1,WNT4,GAL,STUB1	c5_GO.Biological.Process
GOBP_REGULATION_OF_INTERLEUKIN_6_MEDIATED_SIGNALING_PATHWAY	0.00585306	0.119052	0.407018	0.698142	1.81432	9	MIRLET7A1,MIRLET7E,MIR125A,MIR26A1,RIPK1,MIR98,GFI1,PTPN2	c5_GO.Biological.Process	0.0220458	0.270035	0.352488	0.583858	1.71697	10	MIRLET7E,MIR125A,GFI1,MIRLET7C,MIR99A,RIPK1,MIR26A1,MIR98,PTPN2	c5_GO.Biological.Process
GOBP_HEAD_DEVELOPMENT	0.00585929	0.119052	0.407018	0.22276	1.36841	535	AXL,MBP,NCOA6,MAPKAP1,SLC38A2,TSKU,EGFR,SEC16A,PLXNB2,SGPL1,ID2,GLI1,ZSWIM6,BMP4,DKK1,RAC3,ACTB,NR4A2,UFM1,IGF1R,TRABD2A,CHD8,HOOK3,POU6F1,NF2,HSPG2,H2AX,PAX9,HOXA2,ZFAND5,GRIN2D,RTN4R,MKKS,RARA,IMMP2L,DAB2IP,FOXB1,SOX6,MEIS3,PRICKLE1,CELSR2,KDM4B,ALDH1A3,ATP5PF,ATP2B4,ABL1,POMT2,SOX9,PYGO2,KDM7A,GRHL2,WNT7B,KRAS,OSR2,HOXB3,NKX2-1,IL11RA,FOXJ1,GRIN1,UGP2,NDST1,CIC,C12orf57,FOXP1,MSX1,BAX,ATF5,SEM…	c5_GO.Biological.Process	0.0102904	0.198564	0.38073	0.185467	1.34516	560	AXL,KDM6B,DPCD,NAPA,PAFAH1B1,SLC2A1,INHBA,NOTCH3,PYGO2,NDUFS4,PAX2,TACC1,ARID5B,BAX,LDB1,C12orf57,NAGLU,HTRA2,MMP2,ANKRD11,SPHK2,KAT2A,PEX13,VPS51,NOTCH1,CNP,ODAD4,LHX3,KDM4B,TRAPPC9,FKRP,PTCH1,ATXN1L,ACTB,WNT7B,FZD1,QARS1,PLXNB2,EPOR,H2AX,CSNK1E,UFC1,RARB,AATK,DNAJC30,CSNK2A2,ABL1,MKS1,XRCC1,SUN1,B4GALT2,CITED1,ALDH1A3,RARG,PCM1,ANAPC7,MDK,CELSR2,EIF2B5,CASP3,TRA2B,WNT2B,MKKS,SOX2,TP53,GRHL2,SEC…	c5_GO.Biological.Process
JAK.STAT.Signaling	0.00586234	0.0251864	0.407018	0.348845	1.60304	74	EGFR,PIK3CD,IL11,PDGFA,CSF2,SOS2,JAK1,SOCS2,STAT6,MYC,MCL1,IL11RA,CSF3R,IL10RA,CCND1,PDGFRA,EPOR,AKT2,IL6R,PIM1,CCND2,IL15RA,PIK3R3,IL6ST,IL20RB,RAF1,EP300,LEPR,IL20RA,IL5,PIK3R2	NanoString_Genes	0.495108	0.763004	0.0785029	0.188018	0.981578	74	MCL1,CCND1,IL11,STAT6,MYC,LIF,EPOR,PIK3R2,JAK3,CREBBP,AKT2,PTPN11,SOCS1,STAT5B,PIAS4,RAF1,EP300,CSF3R,SOCS2,STAT4,PDGFA,IL6ST	NanoString_Genes
GOBP_ENDOCARDIAL_CUSHION_DEVELOPMENT	0.00586984	0.119052	0.407018	0.422009	1.68425	39	BMP4,DKK1,JAG1,ERBB3,TGFB1,CITED2,SOX9,TBX2,MDM2,MSX1,BMPR2,NOG,ENG,TGFBR1,SMAD2,NOTCH1	c5_GO.Biological.Process	0.865462	0.956533	0.0524828	0.15903	0.731806	41	TGFB1,NOTCH1,CRELD1,TBX2,BMP4,TGFBR2,BMP7,BMPR2,MSX1,NOG,TGFB3,SNAI1,ISL1	c5_GO.Biological.Process
GOBP_CELLULAR_RESPONSE_TO_LIPID	0.00589928	0.119105	0.407018	0.231423	1.38506	400	CYP27B1,BAD,KCNK4,AXL,SCNN1A,CAPN2,NRIP1,EGFR,CACTIN,LYN,SPON2,PTK7,ZFP36L2,TFAP4,WNT5B,UFM1,IGF1R,NR1D1,CPT1A,CYP1B1,SCARB1,CSF2,HOXA2,DDX5,VDR,RARA,DAB2IP,CYP26B1,PMEPA1,BMP6,PTGES3,PAQR7,TP63,BRCA1,ESRRA,ABL1,NR3C1,SOX9,MAPK8,CFLAR,ZBTB7A,KIF18A,RELA,NEDD4,SREBF1,NFKBIA,WNT7B,VPS54,WNT9A,DDX17,FBXO32,DDX54,NFKBIZ,ARID1A,CD68,ATP1A1,SPI1,FOXP1,BGLAP,GNB1,IRS1,LCOR,RXRA,KMT2D,NCOA3,ZFP36L1,PPP1R…	c5_GO.Biological.Process	0.215929	0.643061	0.122679	0.156849	1.09537	397	MAP2K7,AXL,NR3C1,ZBTB7A,IRF3,RUVBL2,PKN1,CD68,PTK7,GSK3A,INHBA,UBE2L3,KMT2D,BAD,KCNK4,TRIM41,ADCY3,ZFP36,RPS6KB1,BRCA1,PAX2,PPARA,SIGIRR,SPON2,HTRA2,MMP2,SPHK2,ABCA1,VPS18,LANCL2,PTCH1,PAQR7,WNT7B,PRKCE,CHMP5,NOS2,BMAL1,UBR5,NR1H3,ABL1,MIR6869,WNT5B,ATP5F1A,RARG,XBP1,BCL2L11,SLC39A9,ADCY5,ADAM15,ATP1A3,FOXA1,MED1,CNOT2,FBXO32,DAB2IP,RELA,ZNF703,TBX1,FOS,FZD4,ADCY6,CX3CL1,WNT11,NDUFA13,GJB2,SMO,DD…	c5_GO.Biological.Process
Direct p53 effectors; datasource: pid;	0.0059012	0.216575	0.407018	0.303558	1.54712	113	CTSD,EGFR,SP1,SESN1,DKK1,BCL6,MET,SH2D1A,PML,DDX5,VDR,TP63,HIC1,MCL1,TP53INP1,SFN,MDM2,PLK3,BAX,RNF144B,BAK1,JUN,NDRG1,MAP4K4,TP53,PCBP4,CASP6,PPM1J,TNFRSF10D,HTT,CASP10,TIGAR,HDAC2,ATF3,CARM1,TRIAP1,NFYA,MMP2,EP300,PRMT1,PIDD1,FOXA1,APAF1,NFYC,IGFBP3,RRM2B,PMS2,TSC2,ZNF385A,S100A2,GPX1	PathwayCommons11	0.10262	0.616786	0.206588	-0.216693	-1.26955	119	EGFR,TP73,BCL6,PML,BCL2,GADD45A,PCBP4,CCNG1,NFYA,MLH1,SESN1,NFYC,TP63,MAP4K4,TFDP1,CEBPZ,DROSHA,PRKAB1,BAK1,SFN,PERP,RRM2B,S100A2,E2F3,ATF3,DDIT4,NFYB,IGFBP3,STEAP3,RNF144B,MSH2,JUN,DGCR8,DUSP5,PCNA,TGFA	PathwayCommons11
[truncated: 14,902 more rows]

## Sheet: KYSE
	KYSE	KYSE	KYSE	KYSE	KYSE	KYSE	KYSE	KYSE
pathway	pval	padj	log2err	ES	NES	size	leadingEdge	gene_set
[truncated: 15,525 more rows]
